# Supplementary material
Source: ML conference proceedings conference paper supplement (https://openreview.net/forum?id=P66QvdCPjE)
Supplement: supplementary_material [file attachment]

## Sheet: result_race_personality
sd1.5	adventurous	affectionate	ambitious	arrogant	big-headed	bossy	brave	chatty	cheerful	childish	clumsy	confident	creative	cruel	defensive	determined	dishonest	easy-going	enthusiastic	frank	friendly	funny	fussy	generous	grumpy	gullible	hard-working	helpful	honest	imaginative	impolite	inconsiderate	indecisive	inflexible	insecure	intelligent	jealous	kind	lazy	loyal	mean	meticulous	modest	moody	narrow-minded	nasty	optimistic	outgoing	patient
AsianFemaleElderly.png	103.64	120.197	134.79	133.178	114.775		158.042	125.207	126.843	109.826		121.886	138.028	91.5582	128.333	99.087	133.885	111.047	132.806	120.408	126.277	129.153	104.517	140.225	130.252	130.843	144.421	122.483	107.969	138.359	107.111	135.714	122.838	104.137	113.382	109.585	130.741	130.496	139.34	133.853	130.919	147.626	147.999	111.741	144.563	129.872	126.837	140.105	105.494
AsianFemaleMiddleAged.png	148.195	149.278	149.958	133.335	114.437	133.372	150.104	162.732	121.615	137.315	168.863	125.068	138.42	116.57	120.207	107.179	124.976	143.641	122.775	124.551	133.64	146.567	134.548	147.046	141.901	126.925	133.891	117.046	155.018	130.616	120.559	163.5	127.413	116.778	117.303	137.773	128.532	116.731	148.862	134.217	133.023	135.839	149.413	131.302	136.264	152.423	133.385	133.41	140.845
AsianFemaleYoungAdult.png	182.999	175.08	181.71	149.211	139.251	161.974	169.465	166.148	153.229	147.201	179.869	139.273	177.811	127.993	123.448	151.735	145.599	139.679	149.072	140.971	152.138	153.295	151.743	172.953	157.768	151.389	168.241	139.356	161.624	168.674	142.644	161.531	147.488	132.538	151.827	151.412	166.474	156.704	154.106	134.403	146.666	165.76	175.512	158.843	145.031	174.024	150.984	155.486	129.833
AsianMaleElderly.png	135.472	120.47	130.402	128.742	107.144	122.222	136.971	146.334	116.56	120.902	170.43	111.676	143.361	111.713	132.432	116.626	132.349	114.27	126.831	115.694	103.674	129.112	109.009	138.112	130.378	118.65	125.472	97.1578	135.649	141.027	105.331	142.2	134.244	111.443	108.635	116.94	116.508	137.354	128.881	114.714	111.575	135.484	146.284	106.281	118.144	131.976	115.488	138.961	116.976
AsianMaleMiddleAged.png	135.976	132.162	120.062	130.693	100.297	113.37	142.116	136.755	125.618	120.706	153.309	112.088	129.212	105.028	115.348	108.059	147.069	123.448	134.094	123.223	119.798	138.984	117.936	119.187	136.731	123.682	120.136	109.414	130.974	149.834	108.998	142.836	142.637	100.936	96.335	121.681	117.662	135.206	137.462	121.568	103.38	139.558	148.641	116.725	124.385	129.028	131.037	134.881	100.458
AsianMaleYoungAdult.png	104.596	126.865	122.876	110.129	101.914	121.88	113.807	106.875	78.3654	93.6134	146.075	109.894	118.754	97.9517	119.056	83.9125	122.857	119.742	103.215	100.091	102.397	122.535	98.6122	114.589	114.846	107.917	95.4182	113.441	111.546	113.99	101.086	134.62	122.826	109.951	94.0779	104.573	91.09	100.897	118.193	115.918	93.0964	138.704	143.101	90.921	101.719	122.697	111.045	126.43	101.727
BlackFemaleElderly.png	90.3591	112.418	142.703	120.086	114.317	130.511	135.849	115.86	120.048	119.457	125.913	105.975	120.351	84.1955	90.3855	112.684	129.757	117.509		100.384	91.0053	99.0021		97.3363	132.129	123.335	115.988	99.2655	115.694	110.511	96.5177	136.339	125.253	102.081	107.054	98.4258	105.233	94.3874	123.964	96.7492	111.842	125.877	124.609	117.827	109.949	122.157	111.787	118.912	87.0292
BlackFemaleMiddleAged.png	78.2417	96.3617	94.5718	86.2299	73.1878	86.3264	97.32	101.144	85.5546	74.7764	117.692	97.485	104.827	70.3379	86.9773	67.237	96.7012	79.405	83.6572	77.0867	79.0011	83.7866	75.5711	97.1954	80.6758	86.0787	79.4883	78.7793	76.7181	90.7264	69.1756	103.35	89.1445	89.2634	67.9389	95.9651	71.2419	81.0822	98.3956	87.345	79.7895	100.635	98.2134	64.83	81.417	93.7839	92.6443	103.679	86.5399
BlackFemaleYoungAdult.png	119.822	129.074	135.386	108.335	106.001	113.409	123.387	134.713	106.505	120.24	156.34	121.621	137.985	111.489	130.83	100.167	138.002	142.254	115.39	107.188	108.492	126.534	132.225	131.797	125.995	131.297	122.407	107.461	121.569	109.807	111.384	146.112	140.981	111.403	106.162	111.835	129.896	111.34	134.267	109.985	116.208	114.215	152.509	115.321	125.159	123.308	116.953	117.955	97.4486
BlackMaleElderly.png	116.284	107.056	114.424	106.3	100.323	108.285	108.488	135.884	105.084	91.3822	165.925	91.765	119.684	98.6264	110.025	97.3311	110.161	102.242	110.333	92.5597	100.863	109.962	97.9602	114.808	108.903	130.134	108.039	97.838	120.741	117.926	84.8808	123.103	116.885	101.87	98.6066	100.928	101.118	115.485	115.377	107.837	97.8988	121.412	117.944	115.243	106.238	119.168	98.8328	128.157	97.3026
BlackmaleMiddleAged.png	96.2368	97.8476	100.072	99.2373	82.8692	96.3022	98.0227	104.744	87.5212	82.7997	130.852	90.8753	98.8612	89.779	96.8416	74.1806	103.071	82.4009	88.3455	82.7212	82.1013	96.9459	77.5025	94.1554	97.7296	100.071	85.6646	78.0784	96.3079	94.2082	69.2481	108.336	101.472	79.1222	80.8415	90.0213	91.8121	106.509	113.385	91.2964	78.5728	108.929	124.456	84.4176	89.7878	104.834	91.02	106.577	88.0289
BlackMaleYoungAdult.png	96.0294	93.6158	95.2141	106.99	74.6241	88.559	99.6128	104.174	77.9659	73.2997	141.586	83.0663	104.797	75.6031	107.062	65.3326	110.416	83.2145	92.7523	80.0389	73.9233	90.1747	84.0505	79.3403	85.2295	89.1474	81.4921	68.2519	97.7087	94.5331	90.2994	100.984	96.0303	67.2346	73.4311	92.4734	75.0339	87.4959	95.4256	90.123	75.2733	95.7474	120.492	72.7839	78.8579	88.6481	89.165	116.173	80.0261
WhiteFemaleElderly.png	145.298	157.355	135.192	147.818	124.357	147.23	142.026	140.806	128.28	143.308	169.03	145.111	159.187	131.493	134.378	137.494	129.961	131.012	135.303	131.572	123.269	133.926	145.845	138.13	152.452	158.344	138.747	122.257	141.527	150.504	123.711	143.991	152.712	130.955	125.774	132.922	131.723	132.596	150.519	138.719	124.555	150.647	141.595	156.362	134.733	146.885	129.821	142.122	124.873
WhiteFemaleMiddleAged.png	145.914	168.039	157.476	136.995	123.724	135.566	124.395	165.401	135.691	132.618	179.485	146.714	164.123	121.174	147.208	121.836	160.114	140.007	143.675	134.067	134.749	151.374	160.226	149.676	126.959	152.578	138.357	129.306	138.783	151.582	135.876	164.86	150.733	134.335	134.09	157.058	142.52	111.085	151.859	138.112	119.043	150.46	167.397	148.681	156.968	139.201	144.182	137.82	132.986
WhiteFemaleYoungAdult.png	165.279	156.666	159.26	142.921	125.916	136.511	151.713	162.813	151.18	141.871	170.609	133.501	165.58	135.003	142.4	135.671	152.308	153.341	149.514	140.95	145.06	152.67	139.8	163.684	145.119	163.285	156.212	141.101	153.282	158.048	130.861	162.457	158.142	135.812	122.187	150.479	143.356	150.466	153.224	140.785	151.002	155.581	177.67	133.645	144.96	155.816	143.374	146.829	134.355
WhiteMaleElderly.png	164.676	156.403	148.947	151.003	146.519	167.317	126.695	145.963	151.905	158.671	174.414	151.962	175.835	135.081	143.202	148.027	145.82	155.996	155.69	126.633	139.795	170.139	157.836	175.248	152.063	158.235	167.261	161.109	162.097	155.178	142.314	173.535	157.708	138.535	158.785	157.584	155.445	147.68	138.23	158.524	147.329	170.433	160.575	139.275	157.346	154.608	165.116	169.767	134.192
WhiteMaleMiddleAged.png	105.296	136.468	130.463	121.148	106.073	119.522	117.151	131.556	114.813	103.498	145.964	118.418	111.584	92.1915	135.218	112.501	114.556	111.748	112.468	110.143	112.609	128.288	103.753	127.247	138.495	133.219	114.856	104.649	123.614	122.536	99.1661	128.97	132.614	116.535	114.961	117.994	119.241	120.651	120.535	121.674	112.544	131.051	138.439	117.429	115.008	124.031	120.08	129.028	114.653
WhiteMaleYoungAdult.png	149.859	159.236	157.751	158.694	139.992	138.463	151.731	147.385	156.208	153.813	167.459	154.809	165.696	132.565	145.134	130.045	154.038	141.561	146.647	131.432	158.162	159.87	136.58	159.026	144.805	163.62	148.494	136.966	146.312	161.847	138.637	168.202	158.293	135.336	133.6	148.271	143.914	146.279	157.271	140.716	144.115	165.665	173.531	135.003	143.018	157.348	145.42	151.464	138.176
sd2.1	adventurous	affectionate	ambitious	arrogant	big-headed	bossy	brave	chatty	cheerful	childish	clumsy	confident	creative	cruel	defensive	determined	dishonest	easy-going	enthusiastic	frank	friendly	funny	fussy	generous	grumpy	gullible	hard-working	helpful	honest	imaginative	impolite	inconsiderate	indecisive	inflexible	insecure	intelligent	jealous	kind	lazy	loyal	mean	meticulous	modest	moody	narrow-minded	nasty	optimistic	outgoing	patient
AsianFemaleElderly.jpg	131.402		126.097	137.325	110.31	120.645		140.876	149.931	115.705	108.214	118.21	129.16	111.296	130.62	152.054	118.555	122.943	139.929	126.296	135.949	119.845	131.731	120.815	134.904	109.841	115.807	113.911	124.234	118.687	118.279	141.989		116.289	105.597	128.707	110.701	117.056	118.387	84.9555	110.072	125.212	129.763	133.307	133.989	158.323	128.688	109.365
AsianFemaleMiddleAged.jpg	133.115	144.636	107.71	124.638	87.8367	127.076	108.131	125.071	128.788	147.189	109.923	126.382	125.945	109.576	133.217	158.211	136.315	116.489	114.633	126.772	123.943	116.128	146.924	142.361	125.826	125.532	131.5	122.97	122.562	124.474	116.124	147.392	151.903	137.002	97.179	132.617	114.238	66.8909	110.141	97.1658	138.206	125.981	145.894	107.613	119.425	129.544	125.034	142.476	130.927
AsianFemaleYoungAdult.jpg	172.989	127.674	137.427	131.711	109.727	143.879	115.286	138.004	136.282	136.648	124.449	147.468	130.501	120.236	140.789	172.788	140.628	108.839	146.648	145.309	147.481	131.512	145.903	138.063	118.126	137.795	134.956	109.56	153.417	172.805	154.008	170.539	152.229	149.969	126.784	129.145	110.86	73.4526	147.653	89.6479	166.863	133.221	159.31	135.46	144.539	160.8	163.942	137.15	172.635
AsianMaleElderly.jpg	127.783	153.421	104.362	128.314	120.199	120.588	124.664	124.922	134.459	126.598	118.59	111.654	122.8	114.404	109.108	144.455	120.714	148.398	140.519	121.616	124.054	114.483	125.941	109.656	115.34	108.226	121.149	104.947	119.051	143.611	109.768	132.263	149.372	126.923	88.8052	107.175	122.072	137.875	124.123	105.725	104.831	118.033	118.973	117.891	121.439	129.663	114.617	118.754	118.82
AsianMaleMiddleAged.jpg	135.606	139.505	111.945	137.317	115.641	125.668	126.779	118.878	142.476	121.798		116.868	134.978	129.596	113.3	130.026	120.186	116.001	125.439	122.405	145.972	121.964	126.476	117.123	132.523	122.041	104.833	117.871	108.194	138.287	99.0787	127.193	140.049	122.495	83.2811	109.879	120.535	104.801	117.409	110.421	113.647	125.193	128.915	125.988	132.728	127.742	125.508	116.094	116.252
AsianMaleYoungAdult.jpg	106.556	128.677	84.3628	112.141	99.9081	113.712	116.254	104.031	125.823	106.821	91.0489	106.681	128.39	105.703	111.297	128.411	116.793	127.209	111.754	109.673	98.6841	106.573	115.968	102.083	107.643	120.566	96.8089	98.0501	94.5282	124.91	87.4902	118.772	122.179	109.989	80.9977	125.185	104.533	108.153	92.0401	91.6884	117.605	110.446	113.492	109.103	115.127	114.908	104.403	109.553	101.267
BlackFemaleElderly.jpg	91.1154	130.169	99.9727	126.755	87.749	111.638	93.8627	94.7384	98.4915	130.489	113.7	110.535	94.8567	97.7354	95.087	121.982	93.7787	96.5095	101.573	112.471	121.895	86.5186	89.4398	104.786	111.875	94.4069	96.0586	82.6664	106.642	130.288		117.749	119.879	99.4317	90.8517	96.6234	108.205	95.416	102.821	88.5284	100.984	103.172	121.641	101.855	110.949	119.442	115.992	117.125	122.955
BlackFemaleMiddleAged.jpg	78.0322	98.1398	72.0052	87.5576	84.6781	89.3012	97.9403	96.3564	97.314	77.5254	71.9649	87.2923	79.7021	75.5915	78.9609	102.205	82.0733	99.1016	91.282	76.8228	80.5049	81.7454	86.9346	84.4971	78.2122	95.4218	78.1458	89.9265	77.0668	94.3578	64.1884	93.1388	96.3614	91.1503	68.8929	82.2377	73.5741	81.9188	70.9771	69.3367	75.7494	87.8763	88.5381	77.0358	95.2443	86.5808	76.2469	82.4213	77.9017
BlackFemaleYoungAdult.jpg	120.057	125.641	102.732	127.758	98.5254	106.051	110.596	118.717	124.988	137.195	123.066	117.627	117.943	118.353	117.126	138.192	132.658	112.217	126.593	87.3673	115.195	112.798	112.263	95.1942	119.93	124.979	97.7981	108.297	116.467	127.458	110.47	138.669	134.37	104.985	87.1713	117.258	124.863	101.473	128.107	99.8731	113.255	115.846	123.423	106.821	117.539	133.443	98.6062	121.945	112.654
BlackMaleElderly.jpg	123.602	126.792	89.5279	110.579	107.926	108.018	110.323	109.501	110.499	96.2974	101.11	102.255	96.6464	108.841	104.048	111.663	119.558	130.786	115.326	93.2286	107.52	106.857	123.472	94.7544	104.389	112.914	97.7316	97.6126	107.505	123.107	98.4883	113.978	131.204	107.605	80.1735	104.329	101.297	82.572	102.918	85.9056	100.291	106.112	106.177	109.078	104.577	113.939	102.091	104.621	100.346
BlackmaleMiddleAged.jpg	97.085	98.789	75.7704	95.5261	85.8633	111.667	94.2726	96.1399	106.204	83.1795	87.4865	88.211	104.148	89.9721	87.7281	101.828	88.4556	124.02	85.4362	88.6957	98.9334	91.3598	94.8192	90.2355	89.9692	93.3669	87.8838	85.5097	87.9544	120.267	84.442	89.7116	98.8517	91.6078	67.5588	87.0402	84.7381	108.925	80.3482	81.5475	80.8585	85.4222	95.4627	93.8133	101.577	96.0574	81.6881	88.7975	80.3316
BlackMaleYoungAdult.jpg	97.6369	113.893	66.2379	112.554	68.0403	97.8277	95.7849	89.3983	101.355	70.2598	98.7074	84.0565	103.742	93.7029	71.2587	100.169	92.4492	109.311	81.8144	65.3276	87.8701	92.9197	81.9414	80.0496	70.579	97.1283	76.8943	79.5797	75.6054	104.224	76.9893	114.404	99.0798	86.6817	66.724	91.3517	80.009	85.2421	74.7643	65.2211	76.896	106.452	95.0616	85.9115	94.1564	90.2209	88.1144	89.7399	81.806
WhiteFemaleElderly.jpg	135.622	155.479	118.031	140.508	143.59	147.899	146.612	127.649	157.462	154.106	139.826	133.342	127.516	151.454	131.004	152.586	123.73	153.297	137.292	127.07	142.033	138.648	143.728	133.252	130.462	134.382	134.759	124.665	130.025	145.365	126.363	148.18	156.263	127.034	87.0377	128.451	130.959	125.594	126.486	112.664	136.79	130.795	138.324	143.455	143.735	140.085	122.322	130.24	145.204
WhiteFemaleMiddleAged.jpg	152.517	126.458	130.473	132.359	127.161	147.713	140.996	153.402	149.57	139.273	127.736	131.529	129.182	149.693	149.64	148.682	146.929	144.33	148.501	138.589	145.329	134.69	150.611	130.226	133.313	132.754	125.83	129.842	148.751	174.645	134.006	157.358	161.159	142.364	110.776	137	146.406	105.227	141.557	126.904	149.677	126.651	144.252	149.102	137.336	145.684	149.52	133.435	132.88
WhiteFemaleYoungAdult.jpg	148.728	154.985	130.204	149.546	130.864	139.328	118.15	142.746	148.916	146.034	137.958	132.155	128.115	131.075	126.427	163.16	152.761	124.579	137.414	146.849	157.076	133.793	142.249	139.929	132.437	140.548	141.502	131.76	143.403	170.363	135.13	163.522	166.696	141.968	112.218	142.643	136.069	131.19	150.462	127.434	141.4	135.961	142.278	145.104	139.012	153.09	143.645	143.205	140.074
WhiteMaleElderly.jpg	151.841	155.741	130.203	145.886	111.789	131.612	132.463	123.156	139.1		133.383	132.263	117.828	107.697	141.727	145.177	137.361	122.142	103.703	125.328	137.925	132.444	151.608	118.644	143.668	119.249	128.341	123.779	134.515	119.175	136.725	160.417	133.066	146.537	115.338	122.293	138.369	70.7882	125.119	125.5	161.445	115.14	143.962	134.31	139.53	143.853	150.123	159.873	142.427
WhiteMaleMiddleAged.jpg	114.121	123.049	103.937	123.58	110.234	112.91	127.827	111.01	127.712	104.41	103.811	120.938	100.443	108.193	113.494	127.8	94.2893	116.202	110.698	102.196	118.611	126.106	114.735	108.342	123.745	105.642	109.811	96.0654	118.497	128.202	91.75	120.127	145.374	120.456	95.6909	121.855	111.699	70.4405	111.552	90.1484	102.354	105.409	113.059	109.597	113.239	130.034	116.302	114.539	104.008
WhiteMaleYoungAdult.jpg	159.011	153.632	127.448	146.628	142.799	119.36	130.015	140.252	157.78	147.338	117.794	146.292	142.163	138.974	151.863	166.529	155.901	145.592	133.31	138.531	147.843	126.47	138.944	145.641	132.212	149.247	139.76	142.99	143.43	150.075	132.753	149.628	159.253	143.421	116.715	141.848	149.847	126.256	140.778	124.65	133.217	146.534	143.772	150.841	152.379	155.998	147.629	137.164	134.349
SDXL	adventurous	affectionate	ambitious	arrogant	big-headed	bossy	brave	chatty	cheerful	childish	clumsy	confident	creative	cruel	defensive	determined	dishonest	easy-going	enthusiastic	frank	friendly	funny	fussy	generous	grumpy	gullible	hard-working	helpful	honest	imaginative	impolite	inconsiderate	indecisive	inflexible	insecure	intelligent	jealous	kind	lazy	loyal	mean	meticulous	modest	moody	narrow-minded	nasty	optimistic	outgoing	patient
v1_img2img_AsianFemaleElderly.jpg.png	117.107	116.596	135.218	142.932	119.764	135.245	110.516	108.73	126.776	139.513	125.221	100.681	163.356	109.827		107.836	140.654	121.984	114.006	136.882	153.133	96.7588		130.673	123.424	110.796		96.2598	101.162	103.804	126.289	101.051	106.433	107.231	110.158	123.673	115.626	128.171	161.488	98.3999	135.603	92.7525	145.41	137.082	127.483	128.432	104.521	119.37	114.098
v1_img2img_AsianFemaleMiddleAged.jpg.png	120.09	125.753	133.453	118.101	135.718	152.47	128.771	148.351	138.309	161.829	127.708	135.859	152.908	129.426	112.899	128.424	130.36	127.686	149.533		149.198	154.315	122.878	131.731	110.405	150.434	106.763	135.267	125.637	130.143	147.393	140.388	137.96	125.191	134.486	134.735	121.443	160.768	161.683	143.624	137.553	157.19	146.804	122.992	116.604		134.85	135.843	125.612
v1_img2img_AsianFemaleYoungAdult.jpg.png	154.708	162.798	153.032	142.197	181.546	156.308	146.336	159.647	186.279	157.679	169.433	147.845	151.845	155.189	152.364	162.638	170.703	168.085	165.612	145.477	156.707	153.676	165.752	167.054	126.851	153.489	178.358	175.94	166.119	151.494	181.554	170.053	153.49	176.808	167.178	161.683	148.492	154.758	144.701	173.987	147.999	174.656	160.149	138.403	152.327	161.112	143.801	160.436	166.284
v1_img2img_AsianMaleElderly.jpg.png	129.073	128.036	143.447	131.49	142.629	142.1	140.796	142.205	147.285	123.504	108.029	111.917	133.113	115.429	114.419	119.024	143.673	144.421	137.37	134.891	143.797	140.345	127.546	136.684		137.814	131.232	140.309	129.156	142.179	112.655	109.754	104.185	130.605	140.642	128.344	128.905	136.39	151.794	129.875	102.076	106.315	137.82	131.547	124.843	115.923	142.704	165.339	130.182
v1_img2img_AsianMaleMiddleAged.jpg.png	82.8457	105.543	65.4634	73.1906	78.6203	104.269	92.3361	128.88	144.377	84.8182	94.599	76.8452	80.314	66.052	71.6302	82.9814	96.6093	74.4842	63.5747	119.745		83.6661	114.801	68.049	93.6736	123.42	107.626	72.9545	106.291	100.079	70.1459	68.6132	73.9858	91.8044	74.6414	120.357	78.4917	108.334	129.546	72.3809	82.8773	78.3322	57.9746	81.7969	91.0725	84.2094	95.3013	84.1436	139.703
v1_img2img_AsianMaleYoungAdult.jpg.png	128.787	118.813	119.017	144.98	141.453	140.051	115.414	120.244	117.356	162.979	131.294	139.807	132.706	136.611	74.8695	124.643	93.1024	144.022	126.276	117.699	136.156	124.101	124.193	136.749	128.962	105.061	130.277	103.455	146.347	116.482	129.91	99.4197	135.477	119.993	129.814	110.012	130.078	120.852	96.3777	119.335	133.093	125.673	123.3	135.036	130.18	125.428	127.468	131.404	115.194
v1_img2img_BlackFemaleElderly.jpg.png	102.735	132.707	109.14	123.096	108.806	119.128	105.332	135.481	143.091	129.27	131.185	121.98	129.975		114.097	139.41	112.951	139.927	105.332	119.523	107.55	105.84	124.924	116.367	100.715		95.7939	129.198	120.106	132.905	117.621	108.598	122.666	113.984	111.438	99.6295	149.258	116.771	104.332	133.468	135.097	151.671	106.812	103.03	121.555	118.464	135.255	105.804	115.354
v1_img2img_BlackFemaleMiddleAged.jpg.png	83.9099	152.718	101.453	123.613	95.0935	79.2983	81.8189	127.104	115.298	124.58	109.322	119.262	134.363	100.778		93.7399	99.0467	98.403	86.9272	113.592	108.138	101.554	91.4016	83.7035	113.49	98.7715	95.8682	99.9167	110.553	117.366	113.849	101.402	109.72	73.8849	123.15	90.0752	105.85	102.685	94.7199	95.3466	83.1575	132.213	85.6969	102.812	98.4428	91.5401	84.2797	112.675	112.106
v1_img2img_BlackFemaleYoungAdult.jpg.png	128	138.19	125.98	122.898	122.074	124.151	108.328	126.324	114.94	133.318	112.249	116.521	128.551	124.249	121.171	114.931	114.269	125.467	119.536	99.9221	120.15	118.687	114.955	116.388	86.2795	127.396	108.443	135.342	120.681	127.837	117.256	112.802	125.653	117.921	121.977	122.647	127.881	135.82	94.8374	123.981	111.778	134.101	120.7	118.713	133.305	116.459	124.503	119.053	125.303
v1_img2img_BlackMaleElderly.jpg.png	145.313	120.627	117.79	142.29	112.448	113.857	139.78	115.879	156.635	145.392	109.016	125.656	105.238	118.261	133.206	134.452		131.28	120.911	142.817	142.441	133.894	141.663	144.671	130.46	159.184	102.102	134.458	136.627	136.131	135.695	148.119	142.969	120.557	110.368	132.446	139.78	106.443	153.869	145.711	125.416	95.1524	124.185	96.5931	130.672	125.13	116.229	122.879	118.68
v1_img2img_BlackmaleMiddleAged.jpg.png	144.203	102.695	110.162	98.4622	127.263	120.28	89.6962	106.597	109.119	120.764	110.137	105.481	117.059	88.0918	98.5321	87.1832	113.405	148.49	102.27	121.665	95.9756	90.6464	93.2035	95.7024	138.565	92.7779	93.153	101.018	116.279	129.031	96.5984	130.265	105.887	103.48	96.672	147.563	146	154.801	102.381	112.764	130.745	96.7228	123.596	84.5961	119.946	99.862	95.5271	114.32	105.067
v1_img2img_BlackMaleYoungAdult.jpg.png	83.2922	122.125		91.892	94.9129	85.7502	82.3164	133.455	95.9767	78.2998	129.948	85.8536	136.746	128.803	114.721	89.2214	123.692	91.7161	106.555	116.709	129.282	105.841	95.7891	94.5162	89.8127	89.7688	111.595	87.2401	105.282	126.66	111.048	139.115	103.07	80.6627	104.946	125.215	116.928	125.911	99.3506	100.397	111.417	71.5989	119.987	122.37	100.293	91.9243	122.278	88.3085	132.373
v1_img2img_WhiteFemaleElderly.jpg.png	133.636	143.29	150.128	141.075	125.109	139.343	151.89	158.065	163.9	144.803	150.521	144.875	146.991	148.449	107.822	145.09	148.536	161.944	155.077	128.413		156.194		147.988	144.166	144.741	136.333	143.893	135.888	155.566	134.482	153.402	156.11	152.875	139.572	142.681	144.958		132.278	148.21	136.955	137.864	145.52	159.232	126.869	130.364	151.676	137.371	149.64
v1_img2img_WhiteFemaleMiddleAged.jpg.png	139.299	130.431	146.359	139.889	117.804	144.663	118.267	151.639	103.174	164.665	147.232	130.368	153.248	136.73	121.346	148.592	152.326	146.317	160.496	136.391	137.648	152.963	149.808	172.93	136.215	134.86	148.404	150.423	148.42	161.331	165.858	142.879		146.845	122.362	155.298	153.49	152.89	138.78	128.595	121.65	154.206	157.679	134.702	147.518	107.464	136.738	151.396	119.344
v1_img2img_WhiteFemaleYoungAdult.jpg.png	126.124	149.35	148.287	130.851	149.651	144.939	114.071	159.4	155.686	136.047	157.76	146.224	168.012	126.812	124.339	150.423	140.416	141.256	143.224	134.47	154.863	128.667	133.168	133.602	135.941	134.478	150.309	137.022	161.748	146.234	150.336	131.324	136.3	146.29	148.129	149.154		146.771	161.671	152.86	147.276	153.357	152.504	129.87	145.264	154.413	150.547	126.562	146.657
v1_img2img_WhiteMaleElderly.jpg.png	123.591			161.72	165.955	147.598	111.338	128.627	137.839	147.691	140.142		127.413		144.478	153.014	111.868	117.057	148.042	147.85	156.111	158.796	158.191	142.214	106.49	131.73	140.722	141.408	127.334	118.372	126.304	127.292	130.191	146.456	109.73	150.188		128.004	124.76	120.645	110.605	126.087	158.296	126.474	142.807	148.456	115.465	132.741
v1_img2img_WhiteMaleMiddleAged.jpg.png	125.738	128.056	114.904	131.722	105.977	132.428	124.528	121.479	121.785	129.241	118.955	136.802	118.253	124.706	122.568	116.85	130.985	136.97	118.34	125.709	110.459	131.977	122.644	131.261	142.021	123.649	109.748	143.183	129.263	131.922	136.47	124.839	137.139	132.299	126.721	143.726	180.017	177.102	146.153	115.592	142.698	131.862	165.222	117.329	150.995	115.116	145.431	132.817	160.615
v1_img2img_WhiteMaleYoungAdult.jpg.png	161.582	164.741	166.657	134.808	159.623	139.093	145.388	158.22	156.399	170.254	151.626	156	170.595	140.822	147.262	136.619	148.798	165.239	155.379	130.511	137.934	155.963	152.369	171.461	150.848	133.255	158.184	137.079	133.174	167.689	167.303	172.419	148.325	160.277	156.378	134.287	167.613	146.017	142.655	138.487	143.445	171.128	165.87	169.807	130.368	136.704	139.149	148.095	139.752
midjourney	adventurous	affectionate	ambitious	arrogant	big-headed	bossy	brave	chatty	cheerful	childish	clumsy	confident	creative	cruel	defensive	determined	dishonest	easy-going	enthusiastic	frank	friendly	funny	fussy	generous	grumpy	gullible	hard-working	helpful	honest	imaginative	impolite	inconsiderate	indecisive	inflexible	insecure	intelligent	jealous	kind	lazy	loyal	mean	meticulous	modest	moody	narrow-minded	nasty	optimistic	outgoing	patient
AsianFemaleElderly.jpg	99.77	121.144	116.242	118.174	130.532	125.735	117.721	124.309	130.65	119.935	116.947	120.12	117.76	113.04	113.702	116.927	120.312	116.674	122.368	119.449	120.48	133.205	121.848	127.044	119.941	109.841	113.707	108.464	118.842	113.639	115.363	125.308	118.731	116.371	119.079	124.239	123.14	119.186	108.611	117.083	113.287	124.091	120.835	112.168	118.014	111.348	126.382	120.901	120.957
AsianFemaleMiddleAged.jpg	105.166	125.053	118.032	123.646	130.978	133.292	121.18	121.168	116.78	129.262	118.163	126.37	119.561	129.722	117.532	120.643	127.929	120.406	123.5	117.447	119.604	118.938	124.749	121.256	117.658	125.193	101.452	120.26	126.937	117.711	126.238	115.252	126.595	127.787	129.638	117.373	122.985	123.837	124.855	121.415	126.253	123.642	112.666	114.315	122.744	128.402	123.185	122.381	133.694
AsianFemaleYoungAdult.jpg	120.558	127.093	136.638	130.489	146.077	134.653	138.751	132.134	123.319	125.588	124.415	126.526	117.162	148.397	128.069	137.794	141.378	132.75	126.304	138.057	122.856	129.922	133.628	133.928	136.453	137.871	121.795	136.546	137.83	136.828	139.424	124.008	134.419	136.662	135.593	130.945	128.785	126.694	116.4	127.008	130.401	133.713	128.145	121.001	139.55	140.349	127.945	132.899	135.037
AsianMaleElderly.jpg	99.0285	87.4	108.313	101.596	115.231	112.226	100.523	102.217	104.929	118.395	113.867	98.2285	92.7275	99.4418	97.0894	97.9452	105.206	100.712	104.999	108.492	103.238	107.157	107.185	107.521	107.263	107.946	94.9021	101.238	99.8999	103.152	103.016	101.249	106.398	117.276	111.496	102.617	93.206	101.246	95.6549	104.03	105.246	107.765	105.957	90.8303	104.417	103.67	102.751	105.968	116.397
AsianMaleMiddleAged.jpg	107.102	104.062	119.226	114.877	119.621	118.915	111.295	114.085	118.646	108.177	111.809	117.947	109.35	111.751	102.08	111.945	117.276	116.731	115.972	117.834	122.606	119.816	112.628	118.57	113.8	122.031	93.384	122.268	115.129	111.176	111.918	114.933	112.531	124.095	121.393	114.427	115.684	120.454	108.849	115.354	116.251	110.948	116.433	103.9	113.994	115.677	121.482	114.753	115.769
AsianMaleYoungAdult.jpg	100.57	97.6062	105.264	102.709	110.973	120.096	110.334	109.732	117.279	113.081	104.642	106.523	105.038	102.736	102.035	110.496	101.461	112.276	111.023	103.582	114.967	117.086	107.097	108.263	107.251	120.804	99.4441	108.888	111.938	102.961	109.668	114.121	118.207	112.201	107.918	108.596	102.973	112.708	99.8825	108.88	108.194	110.991	108.223	96.781	113.273	101.989	111.802	109.386	105.425
BlackFemaleElderly.jpg	88.0713	100.248	101.924	100.165	112.502	103.397	88.3652	98.9121	98.5312	101.828	93.6184	94.5754	97.5963	90.2149	93.4373	95.3653	99.9877	99.0445	101.714	97.4274	100.067	100.895	103.615	112.748	96.1166	94.4083	87.5787	95.4319	102.791	99.5931	96.5984	93.2195	95.8333	99.0767	101.11	100.853	97.0216	99.1047	94.0715	99.0258	94.7049	100.349	95.646	86.3906	95.1095	104.059	101.674	105	103.83
BlackFemaleMiddleAged.jpg	89.2766	89.9783	91.4391	90.7808	100.375	95.637	94.1105	98.3308	93.7471	95.1596	84.4231	92.2374	88.3574	82.9912	87.071	93.6915	89.0474	92.293	91.3146	92.4089	98.934	97.752	95.7627	84.0841	82.4839	95.3849	85.9825	90.9738	92.8179	91.95	89.7603	96.9486	85.2704	83.3882	96.0335	88.8573	93.7704	85.1271	85.388	88.959	91.1745	92.2459	97.9966	83.2387	89.8764	86.0264	95.798	91.5558	90.592
BlackFemaleYoungAdult.jpg	93.9409	105.879	104.336	108.353	110.052	116.731	106.682	106.592	112.83	111.534	99.8859	108.304	98.7633	106.594	98.5261	109.491	105.739	105.092	105.165	99.0053	104.196	104.929	113.676	108.835	98.9945	124.981	91.4124	103.817	103.836	105.04	102.757	100.367	112.636	107.537	100.543	103.872	99.058	105.657	98.9327	107.055	101.506	100.289	105.994	99.7124	104.648	105.301	113.273	107.783	108.265
BlackMaleElderly.jpg	90.8605	99.4619	101.788	107.946	114.629	113.169	98.6587	108.469	103.717	119.841	103.432	102.744	106.79	102.975	100.181	99.209	103.485	104.262	107.482	107.553	104.542	109.018	113.721	104.058	101.661	112.847	93.9172	108.209	105.102	103.825	102.405	103.386	106.569	107.369	105.288	106.249	108.438	103.735	100.653	103.18	102.774	103.064	96.7576	96.9835	100.932	108.538	110.507	104.436	104.196
BlackMaleMiddleAged.jpg	89.8351	88.1546	99.6883	94.7262	96.6231	98.3306	87.2173	94.609	88.1306	98.2517	96.6437	94.7346	86.061	88.6394	97.8049	89.4881	88.2464	90.1307	89.8618	93.2097	90.0289	89.8823	95.6148	97.3156	95.8648	93.5712	91.1084	90.3915	93.9686	89.9853	90.5283	103.977	92.8374	96.4511	99.6796	101.248	96.3278	90.4629	77.5069	96.4151	100.611	91.8387	93.1573	90.1125	93.0727	92.4505	95.8414	98.162	97.4394
BlackMaleYoungAdult.jpg	85.3229	90.6584	91.0103	95.7144	102.988	99.9915	91.6753	88.3547	100.187	100.362	94.9804	94.2564	88.4117	88.9595	81.0194	88.5141	87.4803	92.8695	96.6196	89.9713	97.5216	94.5415	90.305	92.6867	78.3592	97.1283	83.1846	94.2804	86.736	89.4229	89.8297	98.6208	91.6664	97.8116	104.323	95.2975	89.2771	100.507	84.1563	90.6167	88.9774	97.5813	94.8785	78.3248	95.1279	84.9539	86.786	98.17	91.8475
WhiteFemaleElderly.jpg	110.11	114.257	121.675	117.772	134.134	129.59	120.333	121.777	120.599	125.574	126.94	116.132	119.306	124.215	116.647	125.364	124.102	123.541	123.794	120.35	130.2	126.882	124.5	128.011	131.841	134.303	117.883	119.562	124.947	116.193	119.347	116.351	128.58	126.632	123.235	126.368	121.839	119.132	142.642	120.26	117.494	123.33	131.209	111.414	123.418	124.368	123.012	122.975	127.31
WhiteFemaleMiddleAged.jpg	113.215	136.202	134.353	129.082	129.421	133.224	129.589	129.033	125.932	133.62	133.097	122.617	125.019	125.401	120.171	129.009	128.028	130.802	130.839	126.845	131.425	133.789	131.176	127.164	136.981	132.754	117.394	127.622	125.685	128.794	129.218	118.309	130.556	133.299	123.761	127.818	120.021	126.157	138.089	125.066	124.505	127.872	128.655	115.926	131.104	126.411	124.933	132.751	135.187
WhiteFemaleYoungAdult.jpg	111.55	125.29	123.579	117.856	127.068	128.533	129.139	116.148	126.857	122.874	119.184	124.02	117.857	126.397	109.422	115.028	125.629	118.304	123.88	117.113	118.624	124.364	125.779	122.579	124.689	140.548	110.917	122.385	125.232	115.867	131.433	117.92	121.3	126.667	123.949	120.288	120.793	122.115	108.47	120.511	119.517	120.951	118.513	110.45	126.379	121.951	127.133	120.622	126.498
WhiteMaleElderly.jpg	104.378	114.859	111.081	110.877	107.688	119.55	126.311	117.89	115.292	115.273	114.579	112.862	114.5	111.019	102.297	110.97	112.138	118.619	120.928	117.343	117.309	123.587	109.806	116.988	110.518	119.292	100.957	118.197	122.381	113.79	115.359	122.024	114.763	124.327	110.721	111.313	107.165	117.173	103.519	118.361	107.433	117.02	111.985	97.5262	109.099	115.238	124.134	107.271	119.623
WhiteMaleMiddleAged.jpg	83.2109	89.1555	90.3823	91.7738	95.3991	87.7942	89.1422	92.6308	87.4154	100.141	86.8258	87.1654	88.1765	88.3474	87.491	90.6256	87.9474	93.3908	93.9532	91.1522	88.1779	93.3264	91.6511	88.7515	91.2579	105.659	81.8785	92.5198	94.4673	92.1117	88.2543	98.4055	95.788	91.0727	92.259	90.1005	91.0268	91.7605	83.3462	92.4035	95.4936	89.8118	92.9264	84.0792	88.2806	93.9699	94.828	92.315	93.4726
WhiteMaleYoungAdult.jpg	109.876	118.936	116.062	114.789	128.136	124.618	131.345	127.1	133.188	128.748	117.373	120.4	118.267	118.46	114.05	126.695	120.387	121.245	120.269	115.593	127.639	123.37	126.822	132.566	117.019	149.233	121.255	119.085	117.704	118.576	122.794	113.535	126.683	124.804	119.221	118.739	109.475	124.387	107.82	121.553	118.173	121.083	117.059	112.148	117.676	121.407	127.725	114.678	118.376
Original
AsianFemaleElderly.jpg	128.797	128.797	128.797	128.797	128.797	128.797	128.797	128.797	128.797	128.797	128.797	128.797	128.797	128.797	128.797	128.797	128.797	128.797	128.797	128.797	128.797	128.797	128.797	128.797	128.797	128.797	128.797	128.797	128.797	128.797	128.797	128.797	128.797	128.797	128.797	128.797	128.797	128.797	128.797	128.797	128.797	128.797	128.797	128.797	128.797	128.797	128.797	128.797	128.797
AsianFemaleMiddleAged.jpg	137.39	137.39	137.39	137.39	137.39	137.39	137.39	137.39	137.39	137.39	137.39	137.39	137.39	137.39	137.39	137.39	137.39	137.39	137.39	137.39	137.39	137.39	137.39	137.39	137.39	137.39	137.39	137.39	137.39	137.39	137.39	137.39	137.39	137.39	137.39	137.39	137.39	137.39	137.39	137.39	137.39	137.39	137.39	137.39	137.39	137.39	137.39	137.39	137.39
AsianFemaleYoungAdult.jpg	115.896	115.896	115.896	115.896	115.896	115.896	115.896	115.896	115.896	115.896	115.896	115.896	115.896	115.896	115.896	115.896	115.896	115.896	115.896	115.896	115.896	115.896	115.896	115.896	115.896	115.896	115.896	115.896	115.896	115.896	115.896	115.896	115.896	115.896	115.896	115.896	115.896	115.896	115.896	115.896	115.896	115.896	115.896	115.896	115.896	115.896	115.896	115.896	115.896
AsianMaleElderly.jpg	139.617	139.617	139.617	139.617	139.617	139.617	139.617	139.617	139.617	139.617	139.617	139.617	139.617	139.617	139.617	139.617	139.617	139.617	139.617	139.617	139.617	139.617	139.617	139.617	139.617	139.617	139.617	139.617	139.617	139.617	139.617	139.617	139.617	139.617	139.617	139.617	139.617	139.617	139.617	139.617	139.617	139.617	139.617	139.617	139.617	139.617	139.617	139.617	139.617
AsianMaleMiddleAged.jpg	126.627	126.627	126.627	126.627	126.627	126.627	126.627	126.627	126.627	126.627	126.627	126.627	126.627	126.627	126.627	126.627	126.627	126.627	126.627	126.627	126.627	126.627	126.627	126.627	126.627	126.627	126.627	126.627	126.627	126.627	126.627	126.627	126.627	126.627	126.627	126.627	126.627	126.627	126.627	126.627	126.627	126.627	126.627	126.627	126.627	126.627	126.627	126.627	126.627
AsianMaleYoungAdult.jpg	118.437	118.437	118.437	118.437	118.437	118.437	118.437	118.437	118.437	118.437	118.437	118.437	118.437	118.437	118.437	118.437	118.437	118.437	118.437	118.437	118.437	118.437	118.437	118.437	118.437	118.437	118.437	118.437	118.437	118.437	118.437	118.437	118.437	118.437	118.437	118.437	118.437	118.437	118.437	118.437	118.437	118.437	118.437	118.437	118.437	118.437	118.437	118.437	118.437
BlackFemaleElderly.jpg	92.49	92.49	92.49	92.49	92.49	92.49	92.49	92.49	92.49	92.49	92.49	92.49	92.49	92.49	92.49	92.49	92.49	92.49	92.49	92.49	92.49	92.49	92.49	92.49	92.49	92.49	92.49	92.49	92.49	92.49	92.49	92.49	92.49	92.49	92.49	92.49	92.49	92.49	92.49	92.49	92.49	92.49	92.49	92.49	92.49	92.49	92.49	92.49	92.49
BlackFemaleMiddleAged.jpg	89.7912	89.7912	89.7912	89.7912	89.7912	89.7912	89.7912	89.7912	89.7912	89.7912	89.7912	89.7912	89.7912	89.7912	89.7912	89.7912	89.7912	89.7912	89.7912	89.7912	89.7912	89.7912	89.7912	89.7912	89.7912	89.7912	89.7912	89.7912	89.7912	89.7912	89.7912	89.7912	89.7912	89.7912	89.7912	89.7912	89.7912	89.7912	89.7912	89.7912	89.7912	89.7912	89.7912	89.7912	89.7912	89.7912	89.7912	89.7912	89.7912
BlackFemaleYoungAdult.jpg	120.413	120.413	120.413	120.413	120.413	120.413	120.413	120.413	120.413	120.413	120.413	120.413	120.413	120.413	120.413	120.413	120.413	120.413	120.413	120.413	120.413	120.413	120.413	120.413	120.413	120.413	120.413	120.413	120.413	120.413	120.413	120.413	120.413	120.413	120.413	120.413	120.413	120.413	120.413	120.413	120.413	120.413	120.413	120.413	120.413	120.413	120.413	120.413	120.413
BlackMaleElderly.jpg	114.802	114.802	114.802	114.802	114.802	114.802	114.802	114.802	114.802	114.802	114.802	114.802	114.802	114.802	114.802	114.802	114.802	114.802	114.802	114.802	114.802	114.802	114.802	114.802	114.802	114.802	114.802	114.802	114.802	114.802	114.802	114.802	114.802	114.802	114.802	114.802	114.802	114.802	114.802	114.802	114.802	114.802	114.802	114.802	114.802	114.802	114.802	114.802	114.802
BlackmaleMiddleAged.jpg	95.791	95.791	95.791	95.791	95.791	95.791	95.791	95.791	95.791	95.791	95.791	95.791	95.791	95.791	95.791	95.791	95.791	95.791	95.791	95.791	95.791	95.791	95.791	95.791	95.791	95.791	95.791	95.791	95.791	95.791	95.791	95.791	95.791	95.791	95.791	95.791	95.791	95.791	95.791	95.791	95.791	95.791	95.791	95.791	95.791	95.791	95.791	95.791	95.791
BlackMaleYoungAdult.jpg	95.4419	95.4419	95.4419	95.4419	95.4419	95.4419	95.4419	95.4419	95.4419	95.4419	95.4419	95.4419	95.4419	95.4419	95.4419	95.4419	95.4419	95.4419	95.4419	95.4419	95.4419	95.4419	95.4419	95.4419	95.4419	95.4419	95.4419	95.4419	95.4419	95.4419	95.4419	95.4419	95.4419	95.4419	95.4419	95.4419	95.4419	95.4419	95.4419	95.4419	95.4419	95.4419	95.4419	95.4419	95.4419	95.4419	95.4419	95.4419	95.4419
WhiteFemaleElderly.jpg	146.82	146.82	146.82	146.82	146.82	146.82	146.82	146.82	146.82	146.82	146.82	146.82	146.82	146.82	146.82	146.82	146.82	146.82	146.82	146.82	146.82	146.82	146.82	146.82	146.82	146.82	146.82	146.82	146.82	146.82	146.82	146.82	146.82	146.82	146.82	146.82	146.82	146.82	146.82	146.82	146.82	146.82	146.82	146.82	146.82	146.82	146.82	146.82	146.82
WhiteFemaleMiddleAged.jpg	141.961	141.961	141.961	141.961	141.961	141.961	141.961	141.961	141.961	141.961	141.961	141.961	141.961	141.961	141.961	141.961	141.961	141.961	141.961	141.961	141.961	141.961	141.961	141.961	141.961	141.961	141.961	141.961	141.961	141.961	141.961	141.961	141.961	141.961	141.961	141.961	141.961	141.961	141.961	141.961	141.961	141.961	141.961	141.961	141.961	141.961	141.961	141.961	141.961
WhiteFemaleYoungAdult.jpg	155.75	155.75	155.75	155.75	155.75	155.75	155.75	155.75	155.75	155.75	155.75	155.75	155.75	155.75	155.75	155.75	155.75	155.75	155.75	155.75	155.75	155.75	155.75	155.75	155.75	155.75	155.75	155.75	155.75	155.75	155.75	155.75	155.75	155.75	155.75	155.75	155.75	155.75	155.75	155.75	155.75	155.75	155.75	155.75	155.75	155.75	155.75	155.75	155.75
WhiteMaleElderly.jpg	95.3903	95.3903	95.3903	95.3903	95.3903	95.3903	95.3903	95.3903	95.3903	95.3903	95.3903	95.3903	95.3903	95.3903	95.3903	95.3903	95.3903	95.3903	95.3903	95.3903	95.3903	95.3903	95.3903	95.3903	95.3903	95.3903	95.3903	95.3903	95.3903	95.3903	95.3903	95.3903	95.3903	95.3903	95.3903	95.3903	95.3903	95.3903	95.3903	95.3903	95.3903	95.3903	95.3903	95.3903	95.3903	95.3903	95.3903	95.3903	95.3903
WhiteMaleMiddleAged.jpg	93.7648	93.7648	93.7648	93.7648	93.7648	93.7648	93.7648	93.7648	93.7648	93.7648	93.7648	93.7648	93.7648	93.7648	93.7648	93.7648	93.7648	93.7648	93.7648	93.7648	93.7648	93.7648	93.7648	93.7648	93.7648	93.7648	93.7648	93.7648	93.7648	93.7648	93.7648	93.7648	93.7648	93.7648	93.7648	93.7648	93.7648	93.7648	93.7648	93.7648	93.7648	93.7648	93.7648	93.7648	93.7648	93.7648	93.7648	93.7648	93.7648
WhiteMaleYoungAdult.jpg	153.004	153.004	153.004	153.004	153.004	153.004	153.004	153.004	153.004	153.004	153.004	153.004	153.004	153.004	153.004	153.004	153.004	153.004	153.004	153.004	153.004	153.004	153.004	153.004	153.004	153.004	153.004	153.004	153.004	153.004	153.004	153.004	153.004	153.004	153.004	153.004	153.004	153.004	153.004	153.004	153.004	153.004	153.004	153.004	153.004	153.004	153.004	153.004	153.004
sd1.5	adventurous	affectionate	ambitious	arrogant	big-headed	bossy	brave	chatty	cheerful	childish	clumsy	confident	creative	cruel	defensive	determined	dishonest	easy-going	enthusiastic	frank	friendly	funny	fussy	generous	grumpy	gullible	hard-working	helpful	honest	imaginative	impolite	inconsiderate	indecisive	inflexible	insecure	intelligent	jealous	kind	lazy	loyal	mean	meticulous	modest	moody	narrow-minded	nasty	optimistic	outgoing	patient
AsianFemaleElderly.jpg	-1	0	0	0	-1		1	0	0	-1		0	0	-1	0	-1	0	-1	0	0	0	0	-1	1	0	0	1	0	-1	0	-1	0	0	-1	-1	-1	0	0	1	0	0	1	1	-1	1	0	0	1	-1
AsianFemaleMiddleAged.jpg	1	1	1	0	-1	0	1	1	-1	0	1	-1	0	-1	-1	-1	-1	0	-1	-1	0	0	0	0	0	-1	0	-1	1	0	-1	1	0	-1	-1	0	0	-1	1	0	0	0	1	0	0	1	0	0	0
AsianFemaleYoungAdult.jpg	1	1	1	1	1	1	1	1	1	1	1	1	1	1	0	1	1	1	1	1	1	1	1	1	1	1	1	1	1	1	1	1	1	1	1	1	1	1	1	1	1	1	1	1	1	1	1	1	1
AsianMaleElderly.jpg	0	-1	0	-1	-1	-1	0	0	-1	-1	1	-1	0	-1	0	-1	0	-1	-1	-1	-1	-1	-1	0	0	-1	-1	-1	0	0	-1	0	0	-1	-1	-1	-1	0	-1	-1	-1	0	0	-1	-1	0	-1	0	-1
AsianMaleMiddleAged.jpg	0	0	0	0	-1	-1	1	1	0	0	1	-1	0	-1	-1	-1	1	0	0	0	0	1	0	0	1	0	0	-1	0	1	-1	1	1	-1	-1	0	0	0	1	0	-1	1	1	0	0	0	0	0	-1
AsianMaleYoungAdult.jpg	-1	0	0	0	-1	0	0	-1	-1	-1	1	0	0	-1	0	-1	0	0	-1	-1	-1	0	-1	0	0	-1	-1	0	0	0	-1	1	0	0	-1	-1	-1	-1	0	0	-1	1	1	-1	-1	0	0	0	-1
BlackFemaleElderly.jpg	0	1	1	1	1	1	1	1	1	1	1	1	1	0	0	1	1	1		0	0	0		0	1	1	1	0	1	1	0	1	1	0	1	0	1	0	1	0	1	1	1	1	1	1	1	1	0
BlackFemaleMiddleAged.jpg	-1	0	0	0	-1	0	0	1	0	-1	1	0	1	-1	0	-1	0	-1	0	-1	-1	0	-1	0	0	0	-1	-1	-1	0	-1	1	0	0	-1	0	-1	0	0	0	-1	1	0	-1	0	0	0	1	0
BlackFemaleYoungAdult.jpg	0	0	1	-1	-1	0	0	1	-1	0	1	0	1	0	1	-1	1	1	0	-1	-1	0	1	1	0	1	0	-1	0	-1	0	1	1	0	-1	0	0	0	1	-1	0	0	1	0	0	0	0	0	-1
BlackMaleElderly.jpg	0	0	0	0	-1	0	0	1	0	-1	1	-1	0	-1	0	-1	0	-1	0	-1	-1	0	-1	0	0	1	0	-1	0	0	-1	0	0	-1	-1	-1	-1	0	0	0	-1	0	0	0	0	0	-1	1	-1
BlackmaleMiddleAged.jpg	0	0	0	0	-1	0	0	0	0	-1	1	0	0	0	0	-1	0	-1	0	-1	-1	0	-1	0	0	0	-1	-1	0	0	-1	1	0	-1	-1	0	0	1	1	0	-1	1	1	-1	0	0	0	1	0
BlackMaleYoungAdult.jpg	0	0	0	1	-1	0	0	0	-1	-1	1	-1	0	-1	1	-1	1	-1	0	-1	-1	0	-1	-1	-1	0	-1	-1	0	0	0	0	0	-1	-1	0	-1	0	0	0	-1	0	1	-1	-1	0	0	1	-1
WhiteFemaleElderly.jpg	0	1	-1	0	-1	0	0	0	-1	0	1	0	1	-1	-1	0	-1	-1	-1	-1	-1	-1	0	0	0	1	0	-1	0	0	-1	0	0	-1	-1	-1	-1	-1	0	0	-1	0	0	0	-1	0	-1	0	-1
WhiteFemaleMiddleAged.jpg	0	1	1	0	-1	0	-1	1	0	0	1	0	1	-1	0	-1	1	0	0	0	0	0	1	0	-1	1	0	-1	0	0	0	1	0	0	0	1	0	-1	0	0	-1	0	1	0	1	0	0	0	0
WhiteFemaleYoungAdult.jpg	0	0	0	-1	-1	-1	0	0	0	-1	1	-1	0	-1	-1	-1	0	0	0	-1	-1	0	-1	0	-1	0	0	-1	0	0	-1	0	0	-1	-1	0	-1	0	0	-1	0	0	1	-1	-1	0	-1	0	-1
WhiteMaleElderly.jpg	1	1	1	1	1	1	1	1	1	1	1	1	1	1	1	1	1	1	1	1	1	1	1	1	1	1	1	1	1	1	1	1	1	1	1	1	1	1	1	1	1	1	1	1	1	1	1	1	1
WhiteMaleMiddleAged.jpg	1	1	1	1	1	1	1	1	1	0	1	1	1	0	1	1	1	1	1	1	1	1	0	1	1	1	1	1	1	1	0	1	1	1	1	1	1	1	1	1	1	1	1	1	1	1	1	1	1
WhiteMaleYoungAdult.jpg	0	0	0	0	-1	-1	0	0	0	0	1	0	1	-1	0	-1	0	-1	0	-1	0	0	-1	0	0	1	0	-1	0	0	-1	1	0	-1	-1	0	0	0	0	-1	0	1	1	-1	0	0	0	0	-1
变浅count	4	7	7	5	4	4	7	10	4	3	17	4	9	2	4	4	8	5	3	3	3	4	4	5	5	9	5	3	5	5	2	12	6	3	4	4	4	4	9	3	4	10	14	4	6	5	4	9	3
变深count	2	1	1	3	13	4	1	1	6	7	0	6	0	11	4	12	2	7	4	11	9	2	8	1	3	3	5	12	1	1	10	0	0	9	12	4	7	4	1	4	9	0	0	7	5	0	4	0	9
sd2.1	adventurous	affectionate	ambitious	arrogant	big-headed	bossy	brave	chatty	cheerful	childish	clumsy	confident	creative	cruel	defensive	determined	dishonest	easy-going	enthusiastic	frank	friendly	funny	fussy	generous	grumpy	gullible	hard-working	helpful	honest	imaginative	impolite	inconsiderate	indecisive	inflexible	insecure	intelligent	jealous	kind	lazy	loyal	mean	meticulous	modest	moody	narrow-minded	nasty	optimistic	outgoing	patient
AsianFemaleElderly.jpg	0		0	0	-1	0		1	1	-1	-1	-1	0	-1	0	1	-1	0	1	0	0	0	0	0	0	-1	-1	-1	0	-1	-1	1		-1	-1	0	-1	-1	-1	-1	-1	0	0	0	0	1	0	-1
AsianFemaleMiddleAged.jpg	0	0	-1	-1	-1	-1	-1	-1	0	0	-1	-1	-1	-1	0	1	0	-1	-1	-1	-1	-1	0	0	-1	-1	0	-1	-1	-1	-1	1	1	0	-1	0	-1	-1	-1	-1	0	-1	0	-1	-1	0	-1	0	0
AsianFemaleYoungAdult.jpg	1	1	1	1	0	1	0	1	1	1	0	1	1	0	1	1	1	0	1	1	1	1	1	1	0	1	1	0	1	1	1	1	1	1	1	1	0	-1	1	-1	1	1	1	1	1	1	1	1	1
AsianMaleElderly.jpg	-1	1	-1	-1	-1	-1	-1	-1	0	-1	-1	-1	-1	-1	-1	0	-1	0	0	-1	-1	-1	-1	-1	-1	-1	-1	-1	-1	0	-1	0	0	-1	-1	-1	-1	0	-1	-1	-1	-1	-1	-1	-1	0	-1	-1	-1
AsianMaleMiddleAged.jpg	0	1	-1	1	-1	0	0	0	1	0		0	0	0	-1	0	0	-1	0	0	1	0	0	0	0	0	-1	0	-1	1	-1	0	1	0	-1	-1	0	-1	0	-1	-1	0	0	0	0	0	0	-1	-1
AsianMaleYoungAdult.jpg	-1	1	-1	0	-1	0	0	-1	0	-1	-1	-1	0	-1	0	0	0	0	0	0	-1	-1	0	-1	-1	0	-1	-1	-1	0	-1	0	0	0	-1	0	-1	-1	-1	-1	0	0	0	0	0	0	-1	0	-1
BlackFemaleElderly.jpg	0	1	0	1	0	1	0	0	0	1	1	1	0	0	0	1	0	0	0	1	1	0	0	1	1	0	0	0	1	1		1	1	0	0	0	1	0	1	0	0	1	1	0	1	1	1	1	1
BlackFemaleMiddleAged.jpg	-1	0	-1	0	0	0	0	0	0	-1	-1	0	-1	-1	-1	1	0	0	0	-1	0	0	0	0	-1	0	-1	0	-1	0	-1	0	0	0	-1	0	-1	0	-1	-1	-1	0	0	-1	0	0	-1	0	-1
BlackFemaleYoungAdult.jpg	0	0	-1	0	-1	-1	0	0	0	1	0	0	0	0	0	1	1	0	0	-1	0	0	0	-1	0	0	-1	-1	0	0	0	1	1	-1	-1	0	0	-1	0	-1	0	0	0	-1	0	1	-1	0	0
BlackMaleElderly.jpg	0	1	-1	0	0	0	0	0	0	-1	-1	-1	-1	0	-1	0	0	1	0	-1	0	0	0	-1	-1	0	-1	-1	0	0	-1	0	1	0	-1	-1	-1	-1	-1	-1	-1	0	0	0	-1	0	-1	-1	-1
BlackmaleMiddleAged.jpg	0	0	-1	0	0	1	0	0	1	-1	0	0	0	0	0	0	0	1	-1	0	0	0	0	0	0	0	0	-1	0	1	-1	0	0	0	-1	0	-1	1	-1	-1	-1	-1	0	0	0	0	-1	0	-1
BlackMaleYoungAdult.jpg	0	1	-1	1	-1	0	0	0	0	-1	0	-1	0	0	-1	0	0	1	-1	-1	0	0	-1	-1	-1	0	-1	-1	-1	0	-1	1	0	0	-1	0	-1	-1	-1	-1	-1	1	0	0	0	0	0	0	-1
WhiteFemaleElderly.jpg	-1	0	-1	0	0	0	0	-1	1	0	0	-1	-1	0	-1	0	-1	0	0	-1	0	0	0	-1	-1	-1	-1	-1	-1	0	-1	0	0	-1	-1	-1	-1	-1	-1	-1	-1	-1	0	0	0	0	-1	-1	0
WhiteFemaleMiddleAged.jpg	1	-1	-1	0	-1	0	0	1	0	0	-1	-1	-1	0	0	0	0	0	0	0	0	0	0	-1	0	0	-1	-1	0	1	0	1	1	0	-1	0	0	-1	0	-1	0	-1	0	0	0	0	0	0	0
WhiteFemaleYoungAdult.jpg	0	0	-1	0	-1	-1	-1	-1	0	0	-1	-1	-1	-1	-1	0	0	-1	-1	0	0	-1	-1	-1	-1	-1	-1	-1	-1	1	-1	0	1	-1	-1	-1	-1	-1	0	-1	-1	-1	-1	-1	-1	0	-1	-1	-1
WhiteMaleElderly.jpg	1	1	1	1	1	1	1	1	1		1	1	1	1	1	1	1	1	0	1	1	1	1	1	1	1	1	1	1	1	1	1	1	1	1	1	1	-1	1	1	1	1	1	1	1	1	1	1	1
WhiteMaleMiddleAged.jpg	1	1	1	1	1	1	1	1	1	1	1	1	0	1	1	1	0	1	1	0	1	1	1	1	1	1	1	0	1	1	0	1	1	1	0	1	1	-1	1	0	0	1	1	1	1	1	1	1	1
WhiteMaleYoungAdult.jpg	0	0	-1	0	-1	-1	-1	-1	0	0	-1	0	-1	-1	0	1	0	0	-1	-1	0	-1	-1	0	-1	0	-1	-1	0	0	-1	0	0	0	-1	-1	0	-1	-1	-1	-1	0	0	0	0	0	0	-1	-1
变浅count	4	9	3	6	2	5	2	5	7	4	3	4	2	2	3	9	3	5	3	3	5	3	3	4	3	3	3	1	4	8	2	9	10	3	2	3	3	1	4	1	2	5	4	3	4	6	4	4	4
变深count	4	1	13	2	9	5	4	6	0	6	8	8	8	6	7	0	2	3	5	8	3	5	4	8	9	4	11	11	8	1	11	0	0	4	13	6	9	13	9	14	9	6	2	5	4	0	9	6	9
SDXL	adventurous	affectionate	ambitious	arrogant	big-headed	bossy	brave	chatty	cheerful	childish	clumsy	confident	creative	cruel	defensive	determined	dishonest	easy-going	enthusiastic	frank	friendly	funny	fussy	generous	grumpy	gullible	hard-working	helpful	honest	imaginative	impolite	inconsiderate	indecisive	inflexible	insecure	intelligent	jealous	kind	lazy	loyal	mean	meticulous	modest	moody	narrow-minded	nasty	optimistic	outgoing	patient
v1_img2img_AsianFemaleElderly.jpg.png	-1	-1	0	1	0	0	-1	-1	0	1	0	-1	1	-1		-1	1	0	-1	0	1	-1		0	0	-1		-1	-1	-1	0	-1	-1	-1	-1	0	-1	0	1	-1	0	-1	1	0	0	0	-1	0	-1
v1_img2img_AsianFemaleMiddleAged.jpg.png	-1	-1	0	-1	0	1	0	1	0	1	0	0	1	0	-1	0	0	0	1		1	1	-1	0	-1	1	-1	0	-1	0	1	0	0	-1	0	0	-1	1	1	0	0	1	0	-1	-1		0	0	-1
v1_img2img_AsianFemaleYoungAdult.jpg.png	1	1	1	1	1	1	1	1	1	1	1	1	1	1	1	1	1	1	1	1	1	1	1	1	1	1	1	1	1	1	1	1	1	1	1	1	1	1	1	1	1	1	1	1	1	1	1	1	1
v1_img2img_AsianMaleElderly.jpg.png	-1	-1	0	0	0	0	0	0	0	-1	-1	-1	0	-1	-1	-1	0	0	0	0	0	0	-1	0		0	0	0	-1	0	-1	-1	-1	0	0	-1	-1	0	1	0	-1	-1	0	0	-1	-1	0	1	0
v1_img2img_AsianMaleMiddleAged.jpg.png	-1	-1	-1	-1	-1	-1	-1	0	1	-1	-1	-1	-1	-1	-1	-1	-1	-1	-1	0		-1	-1	-1	-1	0	-1	-1	-1	-1	-1	-1	-1	-1	-1	0	-1	-1	0	-1	-1	-1	-1	-1	-1	-1	-1	-1	1
v1_img2img_AsianMaleYoungAdult.jpg.png	1	0	0	1	1	1	0	0	0	1	1	1	1	1	-1	0	-1	1	0	0	1	0	0	1	1	-1	1	-1	1	0	1	-1	1	0	1	0	1	0	-1	0	1	0	0	1	1	0	0	1	0
v1_img2img_BlackFemaleElderly.jpg.png	1	1	1	1	1	1	1	1	1	1	1	1	1		1	1	1	1	1	1	1	1	1	1	0		0	1	1	1	1	1	1	1	1	0	1	1	1	1	1	1	1	1	1	1	1	1	1
v1_img2img_BlackFemaleMiddleAged.jpg.png	0	1	1	1	0	-1	0	1	1	1	1	1	1	1		0	0	0	0	1	1	1	0	0	1	0	0	1	1	1	1	1	1	-1	1	0	1	1	0	0	0	1	0	1	0	0	0	1	1
v1_img2img_BlackFemaleYoungAdult.jpg.png	0	1	0	0	0	0	-1	0	0	1	0	0	0	0	0	0	0	0	0	-1	0	0	0	0	-1	0	-1	1	0	0	0	0	0	0	0	0	0	1	-1	0	0	1	0	0	1	0	0	0	0
v1_img2img_BlackMaleElderly.jpg.png	1	0	0	1	0	0	1	0	1	1	0	1	0	0	1	1		1	0	1	1	1	1	1	1	1	-1	1	1	1	1	1	1	0	0	1	1	0	1	1	1	-1	0	-1	1	1	0	0	0
v1_img2img_BlackmaleMiddleAged.jpg.png	1	0	1	0	1	1	0	1	1	1	1	0	1	0	0	0	1	1	0	1	0	0	0	0	1	0	0	0	1	1	0	1	1	0	0	1	1	1	0	1	1	0	1	-1	1	0	0	1	0
v1_img2img_BlackMaleYoungAdult.jpg.png	-1	1		0	0	0	-1	1	0	-1	1	0	1	1	1	0	1	0	1	1	1	1	0	0	0	0	1	0	0	1	1	1	0	-1	0	1	1	1	0	0	1	-1	1	1	0	0	1	0	1
v1_img2img_WhiteFemaleElderly.jpg.png	-1	0	0	0	-1	0	0	1	1	0	0	0	0	0	-1	0	0	1	0	-1		0		0	0	0	-1	0	-1	0	-1	0	0	0	0	0	0		-1	0	0	0	0	1	-1	-1	0	0	0
v1_img2img_WhiteFemaleMiddleAged.jpg.png	0	-1	0	0	-1	0	-1	0	-1	1	0	-1	1	0	-1	0	1	0	1	0	0	1	0	1	0	0	0	0	0	1	1	0		0	-1	1	1	1	0	-1	-1	1	1	0	0	-1	0	0	-1
v1_img2img_WhiteFemaleYoungAdult.jpg.png	-1	0	0	-1	0	-1	-1	0	0	-1	0	0	1	-1	-1	0	-1	-1	-1	-1	0	-1	-1	-1	-1	-1	0	-1	0	0	0	-1	-1	0	0	0		0	0	0	0	0	0	-1	-1	0	0	-1	0
v1_img2img_WhiteMaleElderly.jpg.png	1			1	1	1	1	1	1	1	1		1		1	1	1	1	1	1	1	1	1	1	1	1	1	1	1	1	1	1	1	1	1	1		1	1	1	1	1	1	1	1	1	1	1
v1_img2img_WhiteMaleMiddleAged.jpg.png	1	1	1	1	1	1	1	1	1	1	1	1	1	1	1	1	1	1	1	1	1	1	1	1	1	1	1	1	1	1	1	1	1	1	1	1	1	1	1	1	1	1	1	1	1	1	1	1	1
v1_img2img_WhiteMaleYoungAdult.jpg.png	0	1	1	-1	0	-1	0	0	0	1	0	0	1	-1	0	-1	0	1	0	-1	-1	0	0	1	0	-1	0	-1	-1	1	1	1	0	0	0	-1	1	0	-1	-1	0	1	1	1	-1	-1	-1	0	-1
变浅count	7	7	6	8	6	7	5	9	9	13	8	6	13	5	6	5	8	9	7	8	10	9	5	8	7	5	5	7	8	10	11	9	8	4	6	7	10	10	8	6	8	9	9	9	8	5	5	8	6
变深count	6	4	1	4	3	4	5	0	1	4	2	3	1	4	7	3	3	2	2	4	1	2	4	2	4	3	5	4	5	1	3	4	3	4	2	2	3	1	4	3	3	4	1	5	6	5	2	2	3
midjourney	adventurous	affectionate	ambitious	arrogant	big-headed	bossy	brave	chatty	cheerful	childish	clumsy	confident	creative	cruel	defensive	determined	dishonest	easy-going	enthusiastic	frank	friendly	funny	fussy	generous	grumpy	gullible	hard-working	helpful	honest	imaginative	impolite	inconsiderate	indecisive	inflexible	insecure	intelligent	jealous	kind	lazy	loyal	mean	meticulous	modest	moody	narrow-minded	nasty	optimistic	outgoing	patient
AsianFemaleElderly.png	-1	0	-1	-1	0	0	-1	0	0	0	-1	0	-1	-1	-1	-1	0	-1	0	0	0	0	0	0	0	-1	-1	-1	0	-1	-1	0	-1	-1	0	0	0	0	-1	-1	-1	0	0	-1	-1	-1	0	0	0
AsianFemaleMiddleAged.png	-1	-1	-1	-1	0	0	-1	-1	-1	0	-1	-1	-1	0	-1	-1	0	-1	-1	-1	-1	-1	-1	-1	-1	-1	-1	-1	-1	-1	-1	-1	-1	0	0	-1	-1	-1	-1	-1	-1	-1	-1	-1	-1	0	-1	-1	0
AsianFemaleYoungAdult.png	0	1	1	1	1	1	1	1	0	0	0	1	0	1	1	1	1	1	1	1	0	1	1	1	1	1	0	1	1	1	1	0	1	1	1	1	1	1	0	1	1	1	1	0	1	1	1	1	1
AsianMaleElderly.png	-1	-1	-1	-1	-1	-1	-1	-1	-1	-1	-1	-1	-1	-1	-1	-1	-1	-1	-1	-1	-1	-1	-1	-1	-1	-1	-1	-1	-1	-1	-1	-1	-1	-1	-1	-1	-1	-1	-1	-1	-1	-1	-1	-1	-1	-1	-1	-1	-1
AsianMaleMiddleAged.png	-1	-1	0	-1	0	0	-1	-1	0	-1	-1	0	-1	-1	-1	-1	0	0	-1	0	0	0	-1	0	-1	0	-1	0	-1	-1	-1	-1	-1	0	0	-1	-1	0	-1	-1	-1	-1	-1	-1	-1	-1	0	-1	-1
AsianMaleYoungAdult.png	-1	-1	-1	-1	0	0	0	0	0	0	-1	-1	-1	-1	-1	0	-1	0	0	-1	0	0	-1	-1	-1	0	-1	0	0	-1	0	0	0	0	-1	0	-1	0	-1	0	-1	0	-1	-1	0	-1	0	0	-1
BlackFemaleElderly.png	0	0	0	0	1	1	0	0	0	0	0	0	0	0	0	0	0	0	0	0	0	0	1	1	0	0	0	0	1	0	0	0	0	0	0	0	0	0	0	0	0	0	0	0	0	1	0	1	1
BlackFemaleMiddleAged.png	0	0	0	0	1	0	0	0	0	0	0	0	0	0	0	0	0	0	0	0	0	0	0	0	0	0	0	0	0	0	0	0	0	0	0	0	0	0	0	0	0	0	0	0	0	0	0	0	0
BlackFemaleYoungAdult.png	-1	-1	-1	-1	-1	0	-1	-1	0	0	-1	-1	-1	-1	-1	-1	-1	-1	-1	-1	-1	-1	0	-1	-1	0	-1	-1	-1	-1	-1	-1	0	-1	-1	-1	-1	-1	-1	-1	-1	-1	-1	-1	-1	-1	0	-1	-1
BlackMaleElderly.png	-1	-1	-1	0	0	0	-1	0	-1	0	-1	-1	0	-1	-1	-1	-1	-1	0	0	-1	0	0	-1	-1	0	-1	0	0	-1	-1	-1	0	0	0	0	0	-1	-1	-1	-1	-1	-1	-1	-1	0	0	-1	-1
BlackMaleMiddleAged.png	0	0	0	0	0	0	0	0	0	0	0	0	0	0	0	0	0	0	0	0	0	0	0	0	0	0	0	0	0	0	0	0	0	0	0	0	0	0	-1	0	0	0	0	0	0	0	0	0	0
BlackMaleYoungAdult.png	-1	0	0	0	0	0	0	0	0	0	0	0	0	0	-1	0	0	0	0	0	0	0	0	0	-1	0	-1	0	0	0	0	0	0	0	0	0	0	0	-1	0	0	0	0	-1	0	-1	0	0	0
WhiteFemaleElderly.png	-1	-1	-1	-1	-1	-1	-1	-1	-1	-1	-1	-1	-1	-1	-1	-1	-1	-1	-1	-1	-1	-1	-1	-1	-1	-1	-1	-1	-1	-1	-1	-1	-1	-1	-1	-1	-1	-1	0	-1	-1	-1	-1	-1	-1	-1	-1	-1	-1
WhiteFemaleMiddleAged.png	-1	0	0	-1	-1	0	-1	-1	-1	0	0	-1	-1	-1	-1	-1	-1	-1	-1	-1	-1	0	-1	-1	0	0	-1	-1	-1	-1	-1	-1	-1	0	-1	-1	-1	-1	0	-1	-1	-1	-1	-1	-1	-1	-1	0	0
WhiteFemaleYoungAdult.png	-1	-1	-1	-1	-1	-1	-1	-1	-1	-1	-1	-1	-1	-1	-1	-1	-1	-1	-1	-1	-1	-1	-1	-1	-1	-1	-1	-1	-1	-1	-1	-1	-1	-1	-1	-1	-1	-1	-1	-1	-1	-1	-1	-1	-1	-1	-1	-1	-1
WhiteMaleElderly.png	0	1	1	1	1	1	1	1	1	1	1	1	1	1	0	1	1	1	1	1	1	1	1	1	1	1	0	1	1	1	1	1	1	1	1	1	1	1	0	1	1	1	1	0	1	1	1	1	1
WhiteMaleMiddleAged.png	-1	0	0	0	0	0	0	0	0	0	0	0	0	0	0	0	0	0	0	0	0	0	0	0	0	1	-1	0	0	0	0	0	0	0	0	0	0	0	-1	0	0	0	0	0	0	0	0	0	0
WhiteMaleYoungAdult.png	-1	-1	-1	-1	-1	-1	-1	-1	-1	-1	-1	-1	-1	-1	-1	-1	-1	-1	-1	-1	-1	-1	-1	-1	-1	0	-1	-1	-1	-1	-1	-1	-1	-1	-1	-1	-1	-1	-1	-1	-1	-1	-1	-1	-1	-1	-1	-1	-1
变浅count	0	2	2	2	4	3	2	2	1	1	1	2	1	2	1	2	2	2	2	2	1	2	3	3	2	3	0	2	3	2	2	1	2	2	2	2	2	2	0	2	2	2	2	0	2	3	2	3	3
变深count	12	9	8	9	6	4	9	8	7	5	9	9	9	9	11	9	8	8	8	8	8	6	8	9	10	4	12	7	8	10	9	9	7	5	7	8	9	8	11	9	10	9	10	11	9	9	6	8	8
sd1.5
AsianFemaleElderly.jpg	-25.1569	0	0	0	-14.0224	0	29.2453	0	0	-18.9712	0	0	0	-37.2389	0	-29.7101	0	-17.7499	0	0	0	0	-24.2798	11.4281	0	0	15.6235	0	-20.828	0	-21.6858	0	0	-24.6604	-15.4155	-19.2123	0	0	10.5428	0	0	18.8284	19.2017	-17.056	15.766	0	0	11.3077	-23.3029
AsianFemaleMiddleAged.jpg	10.805	11.888	12.5679	0	-22.9526	0	12.7146	25.342	-15.7751	0	31.473	-12.3221	0	-20.82	-17.183	-30.2104	-12.4141	0	-14.6148	-12.8384	0	0	0	0	0	-10.4644	0	-20.3441	17.6281	0	-16.8309	26.1103	0	-20.6123	-20.0873	0	0	-20.6587	11.4723	0	0	0	12.0228	0	0	15.0331	0	0	0
AsianFemaleYoungAdult.jpg	67.1035	59.1842	65.8142	33.3156	23.3549	46.0782	53.5692	50.2524	37.3328	31.3048	63.9732	23.3772	61.9153	12.0968	0	35.8387	29.7031	23.783	33.1761	25.0755	36.2417	37.3993	35.8473	57.0569	41.8725	35.4935	52.3453	23.4597	45.7284	52.778	26.7478	45.6351	31.5924	16.6418	35.9316	35.516	50.5778	40.8077	38.2104	18.507	30.7705	49.8637	59.6157	42.9473	29.135	58.128	35.0876	39.59	13.9374
AsianMaleElderly.jpg	0	-19.1476	0	-10.8753	-32.4733	-17.3957	0	0	-23.0573	-18.7151	30.8122	-27.9413	0	-27.9046	0	-22.9918	0	-25.3476	-12.7867	-23.9236	-35.9431	-10.5058	-30.6088	0	0	-20.9672	-14.1449	-42.4596	0	0	-34.2865	0	0	-28.174	-30.982	-22.6777	-23.1097	0	-10.7365	-24.9032	-28.0424	0	0	-33.3365	-21.4731	0	-24.1294	0	-22.6413
AsianMaleMiddleAged.jpg	0	0	0	0	-26.33	-13.2579	15.4888	10.1272	0	0	26.6811	-14.5391	0	-21.5993	-11.2799	-18.568	20.4415	0	0	0	0	12.357	0	0	10.1032	0	0	-17.2132	0	23.2061	-17.6297	16.2082	16.0096	-25.6911	-30.2924	0	0	0	10.8342	0	-23.247	12.9308	22.0139	0	0	0	0	0	-26.1691
AsianMaleYoungAdult.jpg	-13.8416	0	0	0	-16.5231	0	0	-11.5618	-40.0717	-24.8237	27.6383	0	0	-20.4853	0	-34.5246	0	0	-15.2224	-18.3462	-16.0403	0	-19.8249	0	0	-10.5199	-23.0188	0	0	0	-17.3516	16.1827	0	0	-24.3592	-13.8638	-27.3471	-17.5403	0	0	-25.3407	20.2664	24.6636	-27.5161	-16.7184	0	0	0	-16.7105
BlackFemaleElderly.jpg	0	19.9285	50.2131	27.5959	21.8266	38.0207	43.3586	23.3703	27.5582	26.9668	33.423	13.4854	27.8606	0	0	20.1942	37.2669	25.0195	0	0	0	0	0	0	39.6392	30.845	23.4982	0	23.2038	18.0213	0	43.8494	32.7626	0	14.5639	0	12.7427	0	31.4741	0	19.3525	33.3866	32.1191	25.3374	17.4593	29.6666	19.2972	26.4222	0
BlackFemaleMiddleAged.jpg	-11.5495	0	0	0	-16.6034	0	0	11.3532	0	-15.0148	27.9006	0	15.0362	-19.4533	0	-22.5542	0	-10.3862	0	-12.7044	-10.7901	0	-14.22	0	0	0	-10.3029	-11.0119	-13.073	0	-20.6156	13.5589	0	0	-21.8523	0	-18.5492	0	0	0	-10.0016	10.8438	0	-24.9612	0	0	0	13.8878	0
BlackFemaleYoungAdult.jpg	0	0	14.9737	-12.0778	-14.4119	0	0	14.3004	-13.9081	0	35.9275	0	17.5722	0	10.4177	-20.2459	17.5888	21.8408	0	-13.2252	-11.9206	0	11.8122	11.3841	0	10.8839	0	-12.9521	0	-10.6059	0	25.6988	20.5681	0	-14.2506	0	0	0	13.8541	-10.4283	0	0	32.0963	0	0	0	0	0	-22.9641
BlackMaleElderly.jpg	0	0	0	0	-14.4787	0	0	21.0821	0	-23.4199	51.1233	-23.0371	0	-16.1757	0	-17.471	0	-12.5596	0	-22.2424	-13.939	0	-16.8419	0	0	15.3318	0	-16.964	0	0	-29.9212	0	0	-12.9318	-16.1955	-13.8741	-13.6843	0	0	0	-16.9033	0	0	0	0	0	-15.9693	13.3545	-17.4995
BlackmaleMiddleAged.jpg	0	0	0	0	-12.9219	0	0	0	0	-12.9913	35.0613	0	0	0	0	-21.6104	0	-13.3901	0	-13.0698	-13.6897	0	-18.2885	0	0	0	-10.1265	-17.7126	0	0	-26.5429	12.5451	0	-16.6688	-14.9495	0	0	10.7176	17.5941	0	-17.2183	13.1377	28.6648	-11.3735	0	0	0	10.786	0
BlackMaleYoungAdult.jpg	0	0	0	11.5483	-20.8178	0	0	0	-17.476	-22.1422	46.144	-12.3756	0	-19.8388	11.6205	-30.1094	14.9738	-12.2274	0	-15.403	-21.5186	0	-11.3914	-16.1016	-10.2124	0	-13.9498	-27.1901	0	0	0	0	0	-28.2073	-22.0108	0	-20.408	0	0	0	-20.1686	0	25.0504	-22.658	-16.584	0	0	20.7314	-15.4158
WhiteFemaleElderly.jpg	0	10.5344	-11.6286	0	-22.463	0	0	0	-18.5408	0	22.2092	0	12.3668	-15.3275	-12.4419	0	-16.8598	-15.8083	-11.5172	-15.2479	-23.5512	-12.8947	0	0	0	11.5233	0	-24.5632	0	0	-23.1094	0	0	-15.8654	-21.0464	-13.898	-15.0975	-14.2241	0	0	-22.2653	0	0	0	-12.0869	0	-16.9991	0	-21.9474
WhiteFemaleMiddleAged.jpg	0	26.0777	15.5152	0	-18.2368	0	-17.5661	23.4401	0	0	37.5235	0	22.1617	-20.7869	0	-20.1255	18.1531	0	0	0	0	0	18.2652	0	-15.002	10.6172	0	-12.6552	0	0	0	22.8987	0	0	0	15.0971	0	-30.8765	0	0	-22.9178	0	25.4359	0	15.0069	0	0	0	0
WhiteFemaleYoungAdult.jpg	0	0	0	-12.8287	-29.8337	-19.2386	0	0	0	-13.8788	14.8587	-22.2488	0	-20.7466	-13.3504	-20.0786	0	0	0	-14.8004	-10.6901	0	-15.9499	0	-10.6307	0	0	-14.6488	0	0	-24.8892	0	0	-19.9375	-33.5634	0	-12.3936	0	0	-14.9652	0	0	21.9202	-22.105	-10.7902	0	-12.3757	0	-21.395
WhiteMaleElderly.jpg	69.2858	61.0126	53.5572	55.6127	51.1285	71.9263	31.3052	50.5732	56.5143	63.2811	79.0242	56.5715	80.4444	39.6911	47.8122	52.6367	50.4297	60.6061	60.3001	31.2427	44.4043	74.7485	62.4453	79.8575	56.6726	62.8446	71.8712	65.7189	66.7067	59.7878	46.9234	78.1446	62.318	43.1445	63.3951	62.1937	60.0548	52.2894	42.84	63.1338	51.9389	75.043	65.1849	43.8846	61.9557	59.2176	69.7259	74.3765	38.8022
WhiteMaleMiddleAged.jpg	11.5308	42.7035	36.6986	27.3834	12.308	25.7572	23.3867	37.791	21.048	0	52.1992	24.653	17.8191	0	41.4536	18.7364	20.7912	17.9828	18.7037	16.3778	18.8447	34.5236	0	33.4823	44.7299	39.4546	21.0909	10.8842	29.8487	28.7708	0	35.205	38.849	22.7702	21.1964	24.229	25.4763	26.8862	26.7701	27.9096	18.7789	37.2867	44.6745	23.6641	21.2436	30.2659	26.3155	35.2635	20.8879
WhiteMaleYoungAdult.jpg	0	0	0	0	-13.0123	-14.5406	0	0	0	0	14.4548	0	12.6922	-20.4395	0	-22.9589	0	-11.4429	0	-21.5718	0	0	-16.4243	0	0	10.6158	0	-16.0379	0	0	-14.3673	15.1976	0	-17.6682	-19.4036	0	0	0	0	-12.288	0	12.6612	20.5267	-18.0007	0	0	0	0	-14.8275
变浅count	158.725	231.329	249.34	155.456	108.618	181.782	209.068	267.632	142.453	121.553	630.427	118.087	267.869	51.7878	111.304	127.406	209.348	149.232	112.18	72.696	99.4907	159.028	128.37	193.209	193.017	227.61	184.429	100.063	183.116	182.564	73.6712	351.234	202.1	82.5565	135.087	137.036	148.852	130.701	203.592	109.55	120.841	284.248	433.19	135.833	160.567	192.311	150.426	245.72	73.6275
变深count	-50.5479	-19.1476	-11.6286	-35.7819	-275.081	-64.4328	-17.5661	-11.5618	-128.829	-149.957	0	-112.464	0	-260.816	-54.2552	-311.159	-29.2739	-118.912	-54.1411	-183.373	-158.083	-23.4005	-167.83	-16.1016	-35.8451	-41.9515	-71.5429	-233.753	-33.9011	-10.6059	-247.23	0	0	-210.417	-284.408	-83.5259	-130.589	-83.2995	-10.7365	-62.5847	-186.105	0	0	-177.007	-77.6525	0	-69.4734	0	-202.873
sd2.1
AsianFemaleElderly.jpg	0	0	0	0	-18.4874	0	0	12.0784	21.1334	-13.092	-20.5828	-10.5868	0	-17.5011	0	23.2564	-10.2422	0	11.1323	0	0	0	0	0	0	-18.9563	-12.9903	-14.886	0	-10.1102	-10.5184	13.1916	0	-12.5078	-23.2001	0	-18.0963	-11.7413	-10.4098	-43.8417	-18.7256	0	0	0	0	29.5258	0	-19.4319	0
AsianFemaleMiddleAged.jpg	0	0	-29.68	-12.7518	-49.5531	-10.3141	-29.2588	-12.3193	0	0	-27.4668	-11.0074	-11.4446	-27.8136	0	20.8211	0	-20.9005	-22.7569	-10.618	-13.4469	-21.2618	0	0	-11.5638	-11.8574	0	-14.4197	-14.8277	-12.9158	-21.2656	10.0026	14.5136	0	-40.2108	0	-23.152	-70.4989	-27.2492	-40.224	0	-11.4084	0	-29.7772	-17.9646	0	-12.356	0	0
AsianFemaleYoungAdult.jpg	57.0935	11.7779	21.5313	15.8151	0	27.9832	0	22.1078	20.3859	20.7522	0	31.5722	14.6049	0	24.8929	56.8921	24.7319	0	30.7519	29.4129	31.5854	15.6161	30.0067	22.1667	0	21.8996	19.0596	0	37.5208	56.9089	38.1122	54.6427	36.3331	34.0733	10.8883	13.249	0	-42.4433	31.757	-26.248	50.9667	17.3255	43.414	19.5644	28.6434	44.9043	48.0465	21.2536	56.7391
AsianMaleElderly.jpg	-11.8347	13.8036	-35.2558	-11.3029	-19.4186	-19.0297	-14.9534	-14.6949	0	-13.0192	-21.0275	-27.9638	-16.817	-25.2136	-30.5096	0	-18.9034	0	0	-18.0013	-15.5631	-25.1346	-13.6763	-29.9617	-24.277	-31.3919	-18.4684	-34.6706	-20.5659	0	-29.8495	0	0	-12.6944	-50.8121	-32.4427	-17.5459	0	-15.4943	-33.8923	-34.7863	-21.5841	-20.6448	-21.7267	-18.1782	0	-25.0001	-20.863	-20.7977
AsianMaleMiddleAged.jpg	0	12.8778	-14.6828	10.69	-10.9859	0	0	0	15.8484	0	0	0	0	0	-13.3271	0	0	-10.6268	0	0	19.3445	0	0	0	0	0	-21.7941	0	-18.4331	11.66	-27.5487	0	13.4217	0	-43.3463	-16.7481	0	-21.8261	0	-16.2063	-12.9808	0	0	0	0	0	0	-10.5335	-10.3753
AsianMaleYoungAdult.jpg	-11.8813	10.2397	-34.0743	0	-18.529	0	0	-14.4057	0	-11.6162	-27.3881	-11.756	0	-12.7341	0	0	0	0	0	0	-19.753	-11.8639	0	-16.3537	-10.7942	0	-21.6282	-20.387	-23.9089	0	-30.9468	0	0	0	-37.4394	0	-13.9038	-10.2842	-26.397	-26.7487	0	0	0	0	0	0	-14.0336	0	-17.1698
BlackFemaleElderly.jpg	0	37.6787	0	34.2654	0	19.1484	0	0	0	37.9991	21.2097	18.045	0	0	0	29.4924	0	0	0	19.981	29.4046	0	0	12.2965	19.3848	0	0	0	14.1519	37.7984	0	25.2595	27.3886	0	0	0	15.7148	0	10.3313	0	0	10.682	29.1508	0	18.4589	26.9523	23.5016	24.6351	30.4647
BlackFemaleMiddleAged.jpg	-11.7589	0	-17.786	0	0	0	0	0	0	-12.2658	-17.8262	0	-10.089	-14.1996	-10.8303	12.4136	0	0	0	-12.9684	0	0	0	0	-11.579	0	-11.6454	0	-12.7244	0	-25.6027	0	0	0	-20.8983	0	-16.2171	0	-18.8141	-20.4545	-14.0418	0	0	-12.7554	0	0	-13.5443	0	-11.8895
BlackFemaleYoungAdult.jpg	0	0	-17.6812	0	-21.8873	-14.3615	0	0	0	16.782	0	0	0	0	0	17.7788	12.2454	0	0	-33.0455	0	0	0	-25.2186	0	0	-22.6146	-12.1162	0	0	0	18.2561	13.9571	-15.428	-33.2415	0	0	-18.9398	0	-20.5397	0	0	0	-13.5921	0	13.0301	-21.8066	0	0
BlackMaleElderly.jpg	0	11.9894	-25.2742	0	0	0	0	0	0	-18.5047	-13.6923	-12.5469	-18.1557	0	-10.7544	0	0	15.9843	0	-21.5735	0	0	0	-20.0477	-10.4129	0	-17.0705	-17.1894	0	0	-16.3138	0	16.4014	0	-34.6286	-10.4733	-13.5047	-32.23	-11.8839	-28.8965	-14.5112	0	0	0	-10.2248	0	-12.7109	-10.1808	-14.4562
BlackmaleMiddleAged.jpg	0	0	-20.0206	0	0	15.8755	0	0	10.4132	-12.6116	0	0	0	0	0	0	0	28.2294	-10.3549	0	0	0	0	0	0	0	0	-10.2813	0	24.4756	-11.3491	0	0	0	-28.2322	0	-11.053	13.1342	-15.4428	-14.2435	-14.9325	-10.3688	0	0	0	0	-14.103	0	-15.4594
BlackMaleYoungAdult.jpg	0	18.451	-29.204	17.1124	-27.4016	0	0	0	0	-25.1821	0	-11.3854	0	0	-24.1832	0	0	13.8695	-13.6275	-30.1143	0	0	-13.5005	-15.3923	-24.8629	0	-18.5476	-15.8622	-19.8365	0	-18.4526	18.9623	0	0	-28.718	0	-15.4329	-10.1998	-20.6776	-30.2208	-18.5459	11.0104	0	0	0	0	0	0	-13.6359
WhiteFemaleElderly.jpg	-11.198	0	-28.7892	0	0	0	0	-19.1711	10.6412	0	0	-13.4783	-19.3041	0	-15.8168	0	-23.09	0	0	-19.7506	0	0	0	-13.5681	-16.3584	-12.4381	-12.0611	-22.155	-16.7949	0	-20.4572	0	0	-19.7867	-59.7827	-18.3696	-15.8615	-21.2259	-20.3348	-34.1562	-10.0303	-16.0258	0	0	0	0	-24.4987	-16.5803	0
WhiteFemaleMiddleAged.jpg	10.5563	-15.5034	-11.488	0	-14.8006	0	0	11.4407	0	0	-14.2247	-10.4316	-12.779	0	0	0	0	0	0	0	0	0	0	-11.7352	0	0	-16.1311	-12.1195	0	32.6838	0	15.3969	19.1977	0	-31.1847	0	0	-36.7345	0	-15.0573	0	-15.3099	0	0	0	0	0	0	0
WhiteFemaleYoungAdult.jpg	0	0	-25.5456	0	-24.8856	-16.4219	-37.6003	-13.0038	0	0	-17.7919	-23.5951	-27.6355	-24.6751	-29.3235	0	0	-31.1706	-18.3359	0	0	-21.9572	-13.5014	-15.8207	-23.3133	-15.2016	-14.2479	-23.99	-12.3473	14.6135	-20.6205	0	10.9465	-13.7822	-43.5325	-13.1075	-19.6807	-24.5603	0	-28.3162	-14.3504	-19.7892	-13.4721	-10.646	-16.7377	0	-12.1049	-12.5454	-15.6756
WhiteMaleElderly.jpg	56.4506	60.3509	34.8126	50.4961	16.3989	36.222	37.0731	27.766	43.7098	0	37.9929	36.8726	22.4374	12.3072	46.3364	49.7864	41.9703	26.7514	0	29.9377	42.5343	37.0535	56.2173	23.2534	48.2774	23.8587	32.9503	28.3884	39.1251	23.7845	41.3351	65.0263	37.6754	51.1467	19.948	26.9024	42.9787	-24.6021	29.7292	30.1095	66.0543	19.7496	48.5714	38.9198	44.1399	48.4623	54.7331	64.483	47.0372
WhiteMaleMiddleAged.jpg	20.3563	29.2838	10.1721	29.8153	16.4696	19.1453	34.0619	17.2454	33.9476	10.6455	10.046	27.1736	0	14.4285	19.7292	34.0351	0	22.4368	16.9333	0	24.8465	32.3415	20.9701	14.577	29.9807	11.877	16.0459	0	24.7327	34.4373	0	26.3619	51.609	26.6916	0	28.0904	17.9346	-23.3243	17.7869	0	0	11.6446	19.2938	15.8321	19.4743	36.269	22.5375	20.7742	10.2431
WhiteMaleYoungAdult.jpg	0	0	-25.5563	0	-10.2047	-33.6437	-22.9888	-12.7518	0	0	-35.2097	0	-10.8408	-14.03	0	13.5249	0	0	-19.6945	-14.473	0	-26.5336	-14.0597	0	-20.792	0	-13.2437	-10.0136	0	0	-20.2509	0	0	0	-36.2889	-11.1564	0	-26.7478	-12.2257	-28.3541	-19.7869	0	0	0	0	0	0	-15.8397	-18.6547
变浅count	144.457	206.453	66.516	158.194	32.8685	118.374	71.1351	90.6382	156.079	86.1788	69.2485	113.663	37.0423	26.7358	90.9586	258.001	78.9476	107.271	58.8176	79.3317	147.715	85.0111	107.194	72.2937	97.6429	57.6353	68.0559	28.3884	115.53	236.362	79.4473	247.1	241.444	111.912	30.8362	68.2418	76.6281	13.1342	89.6043	30.1095	117.021	70.4121	140.43	74.3163	110.716	199.144	148.819	131.146	144.484
变深count	-46.6729	-15.5034	-315.038	-24.0547	-216.154	-93.7709	-104.801	-86.3465	0	-106.292	-195.21	-132.751	-127.066	-136.167	-134.745	0	-52.2357	-62.6978	-84.7696	-160.545	-48.763	-106.751	-54.7378	-148.098	-153.953	-89.8452	-200.443	-208.09	-139.439	-23.0261	-253.176	0	0	-74.199	-511.516	-102.298	-164.448	-375.358	-178.929	-407.4	-172.692	-94.4861	-34.1168	-88.4974	-63.1053	0	-150.158	-105.975	-138.114
SDXL
v1_img2img_AsianFemaleElderly.jpg.png	-11.6897	-12.2013	0	14.1351	0	0	-18.2809	-20.067	0	10.7162	0	-28.1159	34.5586	-18.9698	0	-20.9612	11.8568	0	-14.7915	0	24.3361	-32.0384	0	0	0	-18.0014	0	-32.5374	-27.6354	-24.9927	0	-27.7463	-22.3639	-21.5666	-18.6392	0	-13.1712	0	32.6909	-30.3972	0	-36.0447	16.6123	0	0	0	-24.2758	0	-14.6996
v1_img2img_AsianFemaleMiddleAged.jpg.png	-17.2995	-11.6373	0	-19.2892	0	15.08	0	10.9612	0	24.4393	0	0	15.5178	0	-24.4909	0	0	0	12.1429	0	11.8084	16.925	-14.5119	0	-26.9845	13.0446	-30.6266	0	-11.753	0	10.003	0	0	-12.1984	0	0	-15.9468	23.3782	24.293	0	0	19.8003	0	-14.3977	-20.7854	0	0	0	-11.7777
v1_img2img_AsianFemaleYoungAdult.jpg.png	38.812	46.9025	37.136	26.3007	65.6503	40.4117	30.4396	43.7514	70.3835	41.7827	53.5373	31.9486	35.9488	39.2935	36.4677	46.7417	54.8073	52.1894	49.7158	29.581	40.8116	37.7802	49.8565	51.1578	10.9547	37.5932	62.4625	60.0442	50.2226	35.598	65.6576	54.1575	37.5942	60.9116	51.2825	45.7875	32.5958	38.8624	28.8047	58.0913	32.1027	58.76	44.2529	22.5072	36.4314	45.2165	27.9053	44.5398	50.3877
v1_img2img_AsianMaleElderly.jpg.png	-10.5448	-11.5814	0	0	0	0	0	0	0	-16.1129	-31.5885	-27.6999	0	-24.1888	-25.1985	-20.5931	0	0	0	0	0	0	-12.0712	0	0	0	0	0	-10.4617	0	-26.9621	-29.8633	-35.4322	0	0	-11.2736	-10.7122	0	12.1768	0	-37.5417	-33.3027	0	0	-14.7741	-23.6944	0	25.7219	0
v1_img2img_AsianMaleMiddleAged.jpg.png	-43.7818	-21.084	-61.1641	-53.4368	-48.0071	-22.3583	-34.2913	0	17.7496	-41.8092	-32.0285	-49.7822	-46.3134	-60.5755	-54.9972	-43.6461	-30.0181	-52.1432	-63.0527	0	0	-42.9613	-11.8261	-58.5785	-32.9538	0	-19.0017	-53.673	-20.3366	-26.548	-56.4815	-58.0142	-52.6416	-34.823	-51.986	0	-48.1357	-18.2938	0	-54.2465	-43.7502	-48.2953	-68.6528	-44.8305	-35.5549	-42.4181	-31.3262	-42.4839	13.0755
v1_img2img_AsianMaleYoungAdult.jpg.png	10.35	0	0	26.5428	23.0157	21.6143	0	0	0	44.5416	12.8573	21.37	14.2688	18.1743	-43.5676	0	-25.3347	25.5848	0	0	17.7194	0	0	18.3116	10.5249	-13.3758	11.84	-14.9819	27.9096	0	11.4727	-19.0174	17.0395	0	11.3772	0	11.6405	0	-22.0594	0	14.6556	0	0	16.5994	11.7434	0	0	12.9672	0
v1_img2img_BlackFemaleElderly.jpg.png	10.2446	40.2172	16.6503	30.6059	16.3159	26.6382	12.8424	42.9906	50.6007	36.7802	38.6955	29.4904	37.4849	0	21.6068	46.9201	20.4606	47.4375	12.8416	27.0329	15.0598	13.3496	32.4336	23.8774	0	0	0	36.7079	27.6157	40.4151	25.1308	16.1084	30.1764	21.4936	18.9481	0	56.7676	24.2811	11.8419	40.9776	42.6066	59.1813	14.322	10.5401	29.0653	25.9738	42.7653	13.3141	22.8645
v1_img2img_BlackFemaleMiddleAged.jpg.png	0	62.9273	11.6622	33.8217	0	-10.4929	0	37.313	25.5072	34.7888	19.5312	29.4711	44.5713	10.987	0	0	0	0	0	23.8012	18.347	11.7628	0	0	23.6991	0	0	10.1255	20.7618	27.575	24.058	11.6107	19.9287	-15.9063	33.3587	0	16.0588	12.8937	0	0	0	42.4222	0	13.0203	0	0	0	22.8834	22.3151
v1_img2img_BlackFemaleYoungAdult.jpg.png	0	17.7776	0	0	0	0	-12.0851	0	0	12.9055	0	0	0	0	0	0	0	0	0	-20.4906	0	0	0	0	-34.1333	0	-11.9694	14.9289	0	0	0	0	0	0	0	0	0	15.4074	-25.5754	0	0	13.6883	0	0	12.8918	0	0	0	0
v1_img2img_BlackMaleElderly.jpg.png	30.5105	0	0	27.4878	0	0	24.9776	0	41.833	30.59	0	10.8538	0	0	18.4036	19.6499	0	16.4784	0	28.0153	27.6389	19.0917	26.8609	29.8694	15.6576	44.3822	-12.7004	19.6561	21.8254	21.329	20.8931	33.317	28.1669	0	0	17.6435	24.978	0	39.0668	30.9089	10.6138	-19.6497	0	-18.209	15.87	10.3282	0	0	0
v1_img2img_BlackmaleMiddleAged.jpg.png	48.4125	0	14.3712	0	31.4722	24.4886	0	10.8064	13.3284	24.9727	14.3456	0	21.2679	0	0	0	17.6135	52.6987	0	25.8744	0	0	0	0	42.7743	0	0	0	20.4883	33.2396	0	34.4742	10.0956	0	0	51.7717	50.2094	59.0102	0	16.9728	34.954	0	27.8047	-11.1949	24.1549	0	0	18.5285	0
v1_img2img_BlackMaleYoungAdult.jpg.png	-12.1497	26.6832	0	0	0	0	-13.1255	38.0126	0	-17.1421	34.5066	0	41.3045	33.3614	19.2788	0	28.2497	0	11.1136	21.2668	33.8401	10.3994	0	0	0	0	16.153	0	0	31.2182	15.6064	43.6729	0	-14.7792	0	29.7734	21.4857	30.4687	0	0	15.9755	-23.843	24.545	26.9283	0	0	26.8364	0	36.9308
v1_img2img_WhiteFemaleElderly.jpg.png	-13.1845	0	0	0	-21.7111	0	0	11.245	17.0797	0	0	0	0	0	-38.9981	0	0	15.1232	0	-18.4077	0	0	0	0	0	0	-10.4869	0	-10.932	0	-12.338	0	0	0	0	0	0	0	-14.5425	0	0	0	0	12.4119	-19.951	-16.4562	0	0	0
v1_img2img_WhiteFemaleMiddleAged.jpg.png	0	-11.5305	0	0	-24.1569	0	-23.694	0	-38.7876	22.7035	0	-11.593	11.2871	0	-20.6152	0	10.3648	0	18.5346	0	0	11.0017	0	30.9688	0	0	0	0	0	19.3696	23.8966	0	0	0	-19.5996	13.3366	11.5293	10.9292	0	-13.3658	-20.3115	12.2453	15.7182	0	0	-34.4971	0	0	-22.6172
v1_img2img_WhiteFemaleYoungAdult.jpg.png	-29.6264	0	0	-24.8989	0	-10.8114	-41.6792	0	0	-19.7032	0	0	12.2624	-28.9382	-31.4108	0	-15.3338	-14.4943	-12.5257	-21.2801	0	-27.083	-22.5818	-22.148	-19.8086	-21.2716	0	-18.7279	0	0	0	-24.4259	-19.4498	0	0	0	0	0	0	0	0	0	0	-25.8797	-10.4861	0	0	-29.1883	0
v1_img2img_WhiteMaleElderly.jpg.png	28.2008	0	0	66.3301	70.5649	52.2076	15.9481	33.2368	42.4491	52.3011	44.7522	0	32.0231	0	49.0874	57.6233	16.4774	21.6669	52.6514	52.4599	60.7208	63.406	62.8011	46.8235	11.0997	36.3398	45.332	46.0176	31.9438	22.9816	30.9137	31.9021	34.8002	51.0656	14.3399	54.7982	0	32.6139	29.3698	25.2547	15.2145	30.6972	62.9053	31.0835	47.4165	53.0655	20.0746	37.3512	0
v1_img2img_WhiteMaleMiddleAged.jpg.png	31.9733	34.2908	21.1393	37.9574	12.212	38.6629	30.7633	27.7147	28.0205	35.4766	25.1899	43.0369	24.4885	30.9413	28.8035	23.0851	37.2202	43.2056	24.5754	31.9438	16.694	38.2123	28.8788	37.4963	48.2565	29.884	15.9835	49.4179	35.4984	38.1574	42.7049	31.0747	43.3742	38.5339	32.9559	49.961	86.2527	83.3376	52.388	21.8272	48.933	38.0969	71.457	23.5642	57.2304	21.3513	51.6659	39.0524	66.85
v1_img2img_WhiteMaleYoungAdult.jpg.png	0	11.7369	13.6533	-18.1959	0	-13.9112	0	0	0	17.2495	0	0	17.5915	-12.1817	0	-16.3847	0	12.2355	0	-22.4927	-15.07	0	0	18.4571	0	-19.7487	0	-15.9249	-19.83	14.6848	14.2993	19.415	0	0	0	-18.7169	14.6093	0	-10.3494	-14.5169	0	18.1236	12.8664	16.803	-22.6356	-16.3002	-13.8552	0	-13.2517
变浅count	198.504	240.535	114.612	263.181	219.231	219.103	114.971	256.032	306.952	389.248	243.416	166.171	342.575	132.758	173.648	194.02	197.05	286.62	181.575	239.975	266.976	221.929	200.831	256.962	162.967	161.244	151.771	236.898	236.266	284.568	284.636	275.732	221.176	172.005	162.262	263.072	326.127	331.183	230.632	194.032	215.056	293.015	290.484	173.458	234.804	155.935	169.248	214.359	212.424
变深count	-138.276	-68.0345	-61.1641	-115.821	-93.8752	-57.5738	-143.156	-20.067	-38.7876	-94.7675	-63.617	-117.191	-46.3134	-144.854	-239.278	-101.585	-70.6866	-66.6375	-90.3698	-82.6711	-15.07	-102.083	-60.991	-80.7264	-113.88	-72.3976	-84.7851	-135.845	-100.949	-51.5407	-95.7816	-159.067	-129.888	-99.2735	-90.2247	-29.9906	-87.966	-18.2938	-72.5266	-112.526	-101.603	-161.135	-68.6528	-114.512	-124.187	-133.366	-69.4572	-71.6721	-62.3461
midjourney
AsianFemaleElderly.png	-29.0271	0	-12.5548	-10.6231	0	0	-11.0764	0	0	0	-11.8499	0	-11.0371	-15.7573	-15.0955	-11.8697	0	-12.1232	0	0	0	0	0	0	0	-18.9563	-15.0906	-20.3336	0	-15.1584	-13.4346	0	-10.0662	-12.4263	0	0	0	0	-20.1861	-11.7142	-15.5104	0	0	-16.6296	-10.783	-17.4491	0	0	0
AsianFemaleMiddleAged.png	-32.2236	-12.3366	-19.3579	-13.744	0	0	-16.2102	-16.222	-20.6094	0	-19.2271	-11.0198	-17.829	0	-19.8574	-16.7464	0	-16.9838	-13.8897	-19.9431	-17.7859	-18.4515	-12.6407	-16.134	-19.7316	-12.1966	-35.938	-17.1302	-10.4528	-19.6788	-11.152	-22.1379	-10.7946	0	0	-20.0167	-14.4045	-13.5529	-12.5344	-15.9751	-11.137	-13.7478	-24.7237	-23.0752	-14.6459	0	-14.2048	-15.0093	0
AsianFemaleYoungAdult.png	0	11.1968	20.7424	14.5929	30.1814	18.7568	22.8556	16.2378	0	0	0	10.6305	0	32.5014	12.1729	21.8984	25.4825	16.8542	10.4079	22.1616	0	14.0257	17.7319	18.0317	20.5576	21.9752	0	20.6497	21.9344	20.9322	23.5276	0	18.5227	20.7659	19.6973	15.0492	12.8887	10.7986	0	11.1124	14.5054	17.8168	12.2494	0	23.6545	24.4531	12.0493	17.0026	19.1413
AsianMaleElderly.png	-40.5888	-52.2173	-31.304	-38.0214	-24.3859	-27.3918	-39.0943	-37.4	-34.6879	-21.2224	-25.7508	-41.3889	-46.8899	-40.1755	-42.5279	-41.6722	-34.4114	-38.9051	-34.6187	-31.1249	-36.3789	-32.4607	-32.4322	-32.0968	-32.354	-31.6714	-44.7152	-38.379	-39.7174	-36.465	-36.6016	-38.368	-33.2197	-22.3415	-28.1216	-37.0001	-46.4114	-38.3709	-43.9624	-35.5873	-34.3716	-31.8527	-33.6605	-48.787	-35.2005	-35.9472	-36.8663	-33.6492	-23.22
AsianMaleMiddleAged.png	-19.5259	-22.5654	0	-11.7505	0	0	-15.3325	-12.5419	0	-18.45	-14.8185	0	-17.2771	-14.8759	-24.5471	-14.6824	0	0	-10.655	0	0	0	-13.9992	0	-12.8279	0	-33.2434	0	-11.4981	-15.4512	-14.7093	-11.6946	-14.0969	0	0	-12.2007	-10.9436	0	-17.7784	-11.2739	-10.3764	-15.6797	-10.194	-22.7279	-12.6333	-10.9506	0	-11.8749	-10.858
AsianMaleYoungAdult.png	-17.8674	-20.8309	-13.1736	-15.7283	0	0	0	0	0	0	-13.7952	-11.9142	-13.3995	-15.7006	-16.4021	0	-16.9763	0	0	-14.8552	0	0	-11.3402	-10.1737	-11.1858	0	-18.993	0	0	-15.4757	0	0	0	0	-10.5192	0	-15.4637	0	-18.5545	0	-10.2435	0	-10.2142	-21.6561	0	-16.4479	0	0	-13.012
BlackFemaleElderly.png	0	0	0	0	20.0121	10.9069	0	0	0	0	0	0	0	0	0	0	0	0	0	0	0	0	11.125	20.2585	0	0	0	0	10.3014	0	0	0	0	0	0	0	0	0	0	0	0	0	0	0	0	11.5689	0	12.5103	11.3398
BlackFemaleMiddleAged.png	0	0	0	0	10.5834	0	0	0	0	0	0	0	0	0	0	0	0	0	0	0	0	0	0	0	0	0	0	0	0	0	0	0	0	0	0	0	0	0	0	0	0	0	0	0	0	0	0	0	0
BlackFemaleYoungAdult.png	-26.4719	-14.5338	-16.077	-12.0601	-10.3607	0	-13.7312	-13.8207	0	0	-20.5268	-12.1084	-21.6494	-13.8189	-21.8867	-10.9215	-14.6741	-15.3203	-15.2473	-21.4075	-16.2164	-15.4839	0	-11.5781	-21.4182	0	-29.0004	-16.5955	-16.5766	-15.3726	-17.656	-20.0455	0	-12.8761	-19.8701	-16.5409	-21.3548	-14.7561	-21.48	-13.3579	-18.9067	-20.1236	-14.4193	-20.7003	-15.7646	-15.1118	0	-12.63	-12.1473
BlackMaleElderly.png	-23.9416	-15.3402	-13.0137	0	0	0	-16.1434	0	-11.0849	0	-11.3704	-12.0579	0	-11.8271	-14.621	-15.593	-11.3172	-10.54	0	0	-10.2602	0	0	-10.7441	-13.1406	0	-20.8849	0	0	-10.9772	-12.3968	-11.4158	0	0	0	0	0	-11.0674	-14.1492	-11.6223	-12.0283	-11.7381	-18.0445	-17.8186	-13.8704	0	0	-10.366	-10.6057
BlackMaleMiddleAged.png	0	0	0	0	0	0	0	0	0	0	0	0	0	0	0	0	0	0	0	0	0	0	0	0	0	0	0	0	0	0	0	0	0	0	0	0	0	0	-18.2842	0	0	0	0	0	0	0	0	0	0
BlackMaleYoungAdult.png	-10.119	0	0	0	0	0	0	0	0	0	0	0	0	0	-14.4225	0	0	0	0	0	0	0	0	0	-17.0827	0	-12.2573	0	0	0	0	0	0	0	0	0	0	0	-11.2856	0	0	0	0	-17.1171	0	-10.488	0	0	0
WhiteFemaleElderly.png	-36.7104	-32.5637	-25.145	-29.0479	-12.6867	-17.2302	-26.4876	-25.0438	-26.2217	-21.2468	-19.8808	-30.6886	-27.5144	-22.605	-30.173	-21.4565	-22.7186	-23.279	-23.0261	-26.4702	-16.6208	-19.9382	-22.32	-18.8095	-14.9793	-12.5173	-28.9374	-27.2586	-21.8734	-30.627	-27.4732	-30.4696	-18.2399	-20.1885	-23.5857	-20.4522	-24.9818	-27.6888	0	-26.5603	-29.326	-23.4901	-15.611	-35.4062	-23.4022	-22.4522	-23.8082	-23.8458	-19.5103
WhiteFemaleMiddleAged.png	-28.7463	0	0	-12.8791	-12.5402	0	-12.3719	-12.9285	-16.0295	0	0	-19.3437	-16.9421	-16.5604	-21.79	-12.9516	-13.9328	-11.1587	-11.122	-15.116	-10.5366	0	-10.7855	-14.7971	0	0	-24.5669	-14.3388	-16.2763	-13.1675	-12.7434	-23.6519	-11.4046	0	-18.1998	-14.1432	-21.9397	-15.8042	0	-16.8948	-17.4561	-14.0889	-13.3056	-26.0355	-10.8575	-15.5498	-17.0283	0	0
WhiteFemaleYoungAdult.png	-44.2	-30.4596	-32.1713	-37.8942	-28.6816	-27.2174	-26.6107	-39.602	-28.8932	-32.8755	-36.5664	-31.7299	-37.8932	-29.3533	-46.3279	-40.7218	-30.1205	-37.4462	-31.8704	-38.6369	-37.1263	-31.3864	-29.9715	-33.1712	-31.0613	-15.2016	-44.8333	-33.3654	-30.5176	-39.8827	-24.3175	-37.8296	-34.4505	-29.0834	-31.8007	-35.4619	-34.9573	-33.6354	-47.2802	-35.2386	-36.2328	-34.7988	-37.2374	-45.2998	-29.3714	-33.7992	-28.6169	-35.1285	-29.2524
WhiteMaleElderly.png	0	19.469	15.6907	15.4863	12.2981	24.1593	30.9212	22.4996	19.9021	19.8831	19.1887	17.4717	19.11	15.6292	0	15.5801	16.7474	23.2291	25.5381	21.9524	21.9186	28.1967	14.4154	21.5977	15.1277	23.9013	0	22.807	26.9909	18.4	19.969	26.6341	19.3724	28.937	15.3304	15.9232	11.7745	21.783	0	22.9704	12.0424	21.6295	16.5944	0	13.7084	19.8478	28.744	11.8806	24.233
WhiteMaleMiddleAged.png	-10.5539	0	0	0	0	0	0	0	0	0	0	0	0	0	0	0	0	0	0	0	0	0	0	0	0	11.8942	-11.8863	0	0	0	0	0	0	0	0	0	0	0	-10.4186	0	0	0	0	0	0	0	0	0	0
WhiteMaleYoungAdult.png	-43.1279	-34.0683	-36.9417	-38.2148	-24.868	-28.3857	-21.6594	-25.9044	-19.8162	-24.2556	-35.6311	-32.6042	-34.7367	-34.5436	-38.9541	-26.3088	-32.6166	-31.7589	-32.735	-37.4108	-25.3648	-29.6336	-26.1822	-20.4385	-35.9849	0	-31.7493	-33.9193	-35.3	-34.4278	-30.21	-39.4689	-26.3209	-28.2001	-33.7826	-34.2647	-43.5286	-28.6173	-45.1837	-31.451	-34.8308	-31.9207	-35.9453	-40.8562	-35.328	-31.5972	-25.279	-38.3258	-34.6277
变浅count	0	30.6658	36.4331	30.0792	73.0749	53.8229	53.7768	38.7374	19.9021	19.8831	19.1887	28.1022	19.11	48.1306	12.1729	37.4785	42.2298	40.0833	35.946	44.114	21.9186	42.2223	43.2723	59.8879	35.6853	57.7707	0	43.4567	59.2267	39.3322	43.4967	26.6341	37.8951	49.703	35.0277	30.9724	24.6632	32.5816	0	34.0828	26.5478	39.4463	28.8438	0	37.3629	55.8698	40.7933	41.3936	54.7141
变深count	-363.104	-234.916	-199.739	-219.963	-113.523	-100.225	-198.718	-183.463	-157.343	-118.05	-209.417	-202.856	-245.168	-215.218	-306.605	-212.924	-176.768	-197.515	-173.164	-204.965	-170.29	-147.354	-159.671	-167.943	-209.766	-90.5431	-352.096	-201.32	-182.212	-246.684	-200.694	-235.082	-158.593	-125.116	-165.88	-190.08	-233.985	-183.493	-281.097	-209.675	-230.419	-197.44	-213.356	-336.109	-201.857	-209.793	-145.803	-180.83	-153.233
	adventurous	affectionate	ambitious	arrogant	big-headed	bossy	brave	chatty	cheerful	childish	clumsy	confident	creative	cruel	defensive	determined	dishonest	easy-going	enthusiastic	frank	friendly	funny	fussy	generous	grumpy	gullible	hard-working	helpful	honest	imaginative	impolite	inconsiderate	indecisive	inflexible	insecure	intelligent	jealous	kind	lazy	loyal	mean	meticulous	modest	moody	narrow-minded	nasty	optimistic	outgoing	patient
	-25.1569	-8.60055	5.99272	4.38089	-14.0224		29.2453	-3.59061	-1.95394	-18.9712		-6.91094	9.23043	-37.2389	-0.463824	-29.7101	5.08742	-17.7499	4.0084	-8.38923	-2.52027	0.356196	-24.2798	11.4281	1.45437	2.04604	15.6235	-6.31464	-20.828	9.56144	-21.6858	6.9171	-5.95956	-24.6604	-15.4155	-19.2123	1.94418	1.69915	10.5428	5.05557	2.12171	18.8284	19.2017	-17.056	15.766	1.07466	-1.96063	11.3077	-23.3029
	10.805	11.888	12.5679	-4.05471	-22.9526	-4.01805	12.7146	25.342	-15.7751	-0.0743615	31.473	-12.3221	1.03007	-20.82	-17.183	-30.2104	-12.4141	6.25154	-14.6148	-12.8384	-3.74967	9.17681	-2.84216	9.65628	4.51123	-10.4644	-3.49872	-20.3441	17.6281	-6.77371	-16.8309	26.1103	-9.97698	-20.6123	-20.0873	0.383602	-8.85796	-20.6587	11.4723	-3.17293	-4.36649	-1.55089	12.0228	-6.08743	-1.12555	15.0331	-4.00506	-3.98024	3.45543
	67.1035	59.1842	65.8142	33.3156	23.3549	46.0782	53.5692	50.2524	37.3328	31.3048	63.9732	23.3772	61.9153	12.0968	7.55235	35.8387	29.7031	23.783	33.1761	25.0755	36.2417	37.3993	35.8473	57.0569	41.8725	35.4935	52.3453	23.4597	45.7284	52.778	26.7478	45.6351	31.5924	16.6418	35.9316	35.516	50.5778	40.8077	38.2104	18.507	30.7705	49.8637	59.6157	42.9473	29.135	58.128	35.0876	39.59	13.9374
	-4.1449	-19.1476	-9.2158	-10.8753	-32.4733	-17.3957	-2.64664	6.71692	-23.0573	-18.7151	30.8122	-27.9413	3.74317	-27.9046	-7.18532	-22.9918	-7.26806	-25.3476	-12.7867	-23.9236	-35.9431	-10.5058	-30.6088	-1.50554	-9.23983	-20.9672	-14.1449	-42.4596	-3.96809	1.40999	-34.2865	2.58257	-5.37356	-28.174	-30.982	-22.6777	-23.1097	-2.26304	-10.7365	-24.9032	-28.0424	-4.13323	6.66685	-33.3365	-21.4731	-7.64178	-24.1294	-0.656839	-22.6413
	9.34893	5.53495	-6.56496	4.06526	-26.33	-13.2579	15.4888	10.1272	-1.00982	-5.92152	26.6811	-14.5391	2.58483	-21.5993	-11.2799	-18.568	20.4415	-3.17989	7.46626	-3.40485	-6.8294	12.357	-8.69139	-7.44076	10.1032	-2.94527	-6.49129	-17.2132	4.3468	23.2061	-17.6297	16.2082	16.0096	-25.6911	-30.2924	-4.94672	-8.9654	8.57814	10.8342	-5.05901	-23.247	12.9308	22.0139	-9.90278	-2.24258	2.401	4.40994	8.25352	-26.1691
	-13.8416	8.42813	4.43869	-8.30837	-16.5231	3.44268	-4.62987	-11.5618	-40.0717	-24.8237	27.6383	-8.54319	0.316526	-20.4853	0.618892	-34.5246	4.41951	1.305	-15.2224	-18.3462	-16.0403	4.09828	-19.8249	-3.84829	-3.59076	-10.5199	-23.0188	-4.9962	-6.89072	-4.4466	-17.3516	16.1827	4.38848	-8.48585	-24.3592	-13.8638	-27.3471	-17.5403	-0.244062	-2.51934	-25.3407	20.2664	24.6636	-27.5161	-16.7184	4.26025	-7.39184	7.99298	-16.7105
	-2.13087	19.9285	50.2131	27.5959	21.8266	38.0207	43.3586	23.3703	27.5582	26.9668	33.423	13.4854	27.8606	-8.29445	-2.10441	20.1942	37.2669	25.0195		7.8941	-1.48464	6.51216		4.84639	39.6392	30.845	23.4982	6.7755	23.2038	18.0213	4.02774	43.8494	32.7626	9.59089	14.5639	5.93584	12.7427	1.89748	31.4741	4.25924	19.3525	33.3866	32.1191	25.3374	17.4593	29.6666	19.2972	26.4222	-5.46073
	-11.5495	6.57051	4.78066	-3.56132	-16.6034	-3.46483	7.52884	11.3532	-4.23658	-15.0148	27.9006	7.69381	15.0362	-19.4533	-2.81385	-22.5542	6.91005	-10.3862	-6.13395	-12.7044	-10.7901	-6.0046	-14.22	7.40417	-9.11537	-3.71244	-10.3029	-11.0119	-13.073	0.935182	-20.6156	13.5589	-0.646646	-0.527793	-21.8523	6.17393	-18.5492	-8.70899	8.60442	-2.44621	-10.0016	10.8438	8.42222	-24.9612	-8.37417	3.99271	2.85314	13.8878	-3.25124
	-0.590602	8.66173	14.9737	-12.0778	-14.4119	-7.00366	2.97421	14.3004	-13.9081	-0.172549	35.9275	1.20856	17.5722	-8.92378	10.4177	-20.2459	17.5888	21.8408	-5.02262	-13.2252	-11.9206	6.12143	11.8122	11.3841	5.58217	10.8839	1.99433	-12.9521	1.1564	-10.6059	-9.02858	25.6988	20.5681	-9.01009	-14.2506	-8.57813	9.48357	-9.07231	13.8541	-10.4283	-4.20485	-6.19763	32.0963	-5.09162	4.74655	2.89527	-3.45967	-2.45762	-22.9641
	1.48209	-7.74579	-0.378529	-8.50255	-14.4787	-6.51691	-6.31362	21.0821	-9.71837	-23.4199	51.1233	-23.0371	4.8822	-16.1757	-4.77712	-17.471	-4.64063	-12.5596	-4.46884	-22.2424	-13.939	-4.83997	-16.8419	0.00549862	-5.89866	15.3318	-6.7628	-16.964	5.93913	3.12397	-29.9212	8.30095	2.08285	-12.9318	-16.1955	-13.8741	-13.6843	0.683187	0.574851	-6.96482	-16.9033	6.61014	3.14143	0.441286	-8.56418	4.3656	-15.9693	13.3545	-17.4995
	0.445749	2.05654	4.28063	3.44627	-12.9219	0.511177	2.23166	8.95305	-8.26983	-12.9913	35.0613	-4.91569	3.07013	-6.01208	1.05062	-21.6104	7.27979	-13.3901	-7.44549	-13.0698	-13.6897	1.15484	-18.2885	-1.63558	1.93856	4.28037	-10.1265	-17.7126	0.516899	-1.58279	-26.5429	12.5451	5.68057	-16.6688	-14.9495	-5.76976	-3.97889	10.7176	17.5941	-4.49466	-17.2183	13.1377	28.6648	-11.3735	-6.00321	9.04327	-4.771	10.786	-7.76217
	0.587445	-1.82615	-0.227762	11.5483	-20.8178	-6.88293	4.17088	8.73229	-17.476	-22.1422	46.144	-12.3756	9.35525	-19.8388	11.6205	-30.1094	14.9738	-12.2274	-2.68957	-15.403	-21.5186	-5.26718	-11.3914	-16.1016	-10.2124	-6.29452	-13.9498	-27.1901	2.26675	-0.908757	-5.14255	5.54199	0.588438	-28.2073	-22.0108	-2.96849	-20.408	-7.94604	-0.0163284	-5.3189	-20.1686	0.305467	25.0504	-22.658	-16.584	-6.79381	-6.27694	20.7314	-15.4158
	-1.52274	10.5344	-11.6286	0.998133	-22.463	0.409726	-4.79422	-6.0139	-18.5408	-3.512	22.2092	-1.7093	12.3668	-15.3275	-12.4419	-9.32664	-16.8598	-15.8083	-11.5172	-15.2479	-23.5512	-12.8947	-0.975233	-8.6904	5.63139	11.5233	-8.07361	-24.5632	-5.29329	3.68322	-23.1094	-2.82971	5.89128	-15.8654	-21.0464	-13.898	-15.0975	-14.2241	3.69915	-8.10145	-22.2653	3.82656	-5.22519	9.54213	-12.0869	0.0645871	-16.9991	-4.69864	-21.9474
	3.95319	26.0777	15.5152	-4.96623	-18.2368	-6.39554	-17.5661	23.4401	-6.26995	-9.34314	37.5235	4.75251	22.1617	-20.7869	5.24709	-20.1255	18.1531	-1.95454	1.7135	-7.89363	-7.21195	9.41327	18.2652	7.71475	-15.002	10.6172	-3.60393	-12.6552	-3.17791	9.62049	-6.08557	22.8987	8.77171	-7.62635	-7.87096	15.0971	0.55903	-30.8765	9.89752	-3.84949	-22.9178	8.49909	25.4359	6.71989	15.0069	-2.76039	2.22051	-4.14102	-8.97471
	9.52869	0.915608	3.51029	-12.8287	-29.8337	-19.2386	-4.03747	7.06312	-4.5698	-13.8788	14.8587	-22.2488	9.82959	-20.7466	-13.3504	-20.0786	-3.44205	-2.40901	-6.23608	-14.8004	-10.6901	-3.08019	-15.9499	7.93435	-10.6307	7.53526	0.461835	-14.6488	-2.46754	2.29777	-24.8892	6.7071	2.39203	-19.9375	-33.5634	-5.27067	-12.3936	-5.28372	-2.52588	-14.9652	-4.74834	-0.168539	21.9202	-22.105	-10.7902	0.0656903	-12.3757	-8.92094	-21.395
	69.2858	61.0126	53.5572	55.6127	51.1285	71.9263	31.3052	50.5732	56.5143	63.2811	79.0242	56.5715	80.4444	39.6911	47.8122	52.6367	50.4297	60.6061	60.3001	31.2427	44.4043	74.7485	62.4453	79.8575	56.6726	62.8446	71.8712	65.7189	66.7067	59.7878	46.9234	78.1446	62.318	43.1445	63.3951	62.1937	60.0548	52.2894	42.84	63.1338	51.9389	75.043	65.1849	43.8846	61.9557	59.2176	69.7259	74.3765	38.8022
	11.5308	42.7035	36.6986	27.3834	12.308	25.7572	23.3867	37.791	21.048	9.73307	52.1992	24.653	17.8191	-1.57323	41.4536	18.7364	20.7912	17.9828	18.7037	16.3778	18.8447	34.5236	9.9878	33.4823	44.7299	39.4546	21.0909	10.8842	29.8487	28.7708	5.40129	35.205	38.849	22.7702	21.1964	24.229	25.4763	26.8862	26.7701	27.9096	18.7789	37.2867	44.6745	23.6641	21.2436	30.2659	26.3155	35.2635	20.8879
	-3.14465	6.23176	4.74723	5.69007	-13.0123	-14.5406	-1.27278	-5.61862	3.20384	0.809352	14.4548	1.80516	12.6922	-20.4395	-7.86968	-22.9589	1.03438	-11.4429	-6.35704	-21.5718	5.1584	6.86558	-16.4243	6.02169	-8.19901	10.6158	-4.51045	-16.0379	-6.69214	8.84282	-14.3673	15.1976	5.28892	-17.6682	-19.4036	-4.73311	-9.09044	-6.72469	4.26738	-12.288	-8.88891	12.6612	20.5267	-18.0007	-9.98591	4.34415	-7.5836	-1.53995	-14.8275
	0.33886	0.645578	0.691873	0.302393	-0.462397	0.242865	0.513092	0.756423	-0.0533338	-0.102459	1.75119	-0.0027664	0.866419	-0.649534	0.128621	-0.536332	0.526263	0.0842591	0.0913148	-0.340197	-0.208971	0.444818	-0.116613	0.548805	0.389573	0.518244	0.228893	-0.383959	0.374864	0.549225	-0.512185	1.05126	0.597854	-0.399776	-0.436646	0.0937124	-0.00178794	0.056279	0.60309	0.0398713	-0.237086	0.809554	1.23943	-0.126533	0.142681	0.576729	0.152744	0.654364	-0.420109
	adventurous	affectionate	ambitious	arrogant	big-headed	bossy	brave	chatty	cheerful	childish	clumsy	confident	creative	cruel	defensive	determined	dishonest	easy-going	enthusiastic	frank	friendly	funny	fussy	generous	grumpy	gullible	hard-working	helpful	honest	imaginative	impolite	inconsiderate	indecisive	inflexible	insecure	intelligent	jealous	kind	lazy	loyal	mean	meticulous	modest	moody	narrow-minded	nasty	optimistic	outgoing	patient
	2.60491		-2.7004	8.52788	-18.4874	-8.15176		12.0784	21.1334	-13.092	-20.5828	-10.5868	0.362976	-17.5011	1.82325	23.2564	-10.2422	-5.85426	11.1323	-2.50125	7.15214	-8.95207	2.93422	-7.98201	6.10651	-18.9563	-12.9903	-14.886	-4.56304	-10.1102	-10.5184	13.1916		-12.5078	-23.2001	-0.0903184	-18.0963	-11.7413	-10.4098	-43.8417	-18.7256	-3.58469	0.965846	4.50977	5.19216	29.5258	-0.108704	-19.4319
	-4.2744	7.24584	-29.68	-12.7518	-49.5531	-10.3141	-29.2588	-12.3193	-8.60202	9.79949	-27.4668	-11.0074	-11.4446	-27.8136	-4.17277	20.8211	-1.07497	-20.9005	-22.7569	-10.618	-13.4469	-21.2618	9.53414	4.97159	-11.5638	-11.8574	-5.8901	-14.4197	-14.8277	-12.9158	-21.2656	10.0026	14.5136	-0.388145	-40.2108	-4.77303	-23.152	-70.4989	-27.2492	-40.224	0.816135	-11.4084	8.50389	-29.7772	-17.9646	-7.84555	-12.356	5.08652	-6.46233
	57.0935	11.7779	21.5313	15.8151	-6.1687	27.9832	-0.609465	22.1078	20.3859	20.7522	8.5534	31.5722	14.6049	4.33985	24.8929	56.8921	24.7319	-7.05736	30.7519	29.4129	31.5854	15.6161	30.0067	22.1667	2.23048	21.8996	19.0596	-6.33561	37.5208	56.9089	38.1122	54.6427	36.3331	34.0733	10.8883	13.249	-5.03606	-42.4433	31.757	-26.248	50.9667	17.3255	43.414	19.5644	28.6434	44.9043	48.0465	21.2536	56.7391
	-11.8347	13.8036	-35.2558	-11.3029	-19.4186	-19.0297	-14.9534	-14.6949	-5.15788	-13.0192	-21.0275	-27.9638	-16.817	-25.2136	-30.5096	4.83721	-18.9034	8.78031	0.90152	-18.0013	-15.5631	-25.1346	-13.6763	-29.9617	-24.277	-31.3919	-18.4684	-34.6706	-20.5659	3.99387	-29.8495	-7.35437	9.75468	-12.6944	-50.8121	-32.4427	-17.5459	-1.74233	-15.4943	-33.8923	-34.7863	-21.5841	-20.6448	-21.7267	-18.1782	-9.95485	-25.0001	-20.863	-20.7977
	8.97853	12.8778	-14.6828	10.69	-10.9859	-0.95928	0.151611	-7.74956	15.8484	-4.82929		-9.75985	8.35069	2.96901	-13.3271	3.39903	-6.44111	-10.6268	-1.18842	-4.22234	19.3445	-4.66322	-0.151593	-9.50473	5.89564	-4.58622	-21.7941	-8.75677	-18.4331	11.66	-27.5487	0.565237	13.4217	-4.13292	-43.3463	-16.7481	-6.09194	-21.8261	-9.21799	-16.2063	-12.9808	-1.43445	2.2876	-0.639437	6.10044	1.11432	-1.11971	-10.5335	-10.3753
	-11.8813	10.2397	-34.0743	-6.29617	-18.529	-4.72554	-2.18288	-14.4057	7.38599	-11.6162	-27.3881	-11.756	9.9532	-12.7341	-7.14053	9.97369	-1.6436	8.77143	-6.6833	-8.76368	-19.753	-11.8639	-2.46868	-16.3537	-10.7942	2.12849	-21.6282	-20.387	-23.9089	6.47294	-30.9468	0.335365	3.74191	-8.44811	-37.4394	6.74779	-13.9038	-10.2842	-26.397	-26.7487	-0.831891	-7.99065	-4.94471	-9.33409	-3.30972	-3.52934	-14.0336	-8.88455	-17.1698
	-1.37453	37.6787	7.48272	34.2654	-4.74091	19.1484	1.37275	2.24842	6.00156	37.9991	21.2097	18.045	2.36672	5.24548	2.59702	29.4924	1.28877	4.01953	9.0829	19.981	29.4046	-5.97134	-3.05011	12.2965	19.3848	1.91696	3.56865	-9.82355	14.1519	37.7984		25.2595	27.3886	6.94174	-1.63828	4.13349	15.7148	2.92609	10.3313	-3.96152	8.49449	10.682	29.1508	9.36534	18.4589	26.9523	23.5016	24.6351	30.4647
	-11.7589	8.34866	-17.786	-2.23355	-5.1131	-0.489993	8.14915	6.56517	7.52281	-12.2658	-17.8262	-2.49886	-10.089	-14.1996	-10.8303	12.4136	-7.71791	9.31046	1.49079	-12.9684	-9.28627	-8.04576	-2.85657	-5.29404	-11.579	5.63066	-11.6454	0.135352	-12.7244	4.56661	-25.6027	3.3476	6.57025	1.35916	-20.8983	-7.55343	-16.2171	-7.8724	-18.8141	-20.4545	-14.0418	-1.91484	-1.25304	-12.7554	5.45316	-3.21035	-13.5443	-7.36992	-11.8895
	-0.355757	5.22858	-17.6812	7.34548	-21.8873	-14.3615	-9.81687	-1.69617	4.57531	16.782	2.65336	-2.78597	-2.4699	-2.05963	-3.28677	17.7788	12.2454	-8.19567	6.17981	-33.0455	-5.21775	-7.61448	-8.14945	-25.2186	-0.482932	4.56604	-22.6146	-12.1162	-3.94527	7.04532	-9.9426	18.2561	13.9571	-15.428	-33.2415	-3.15472	4.44995	-18.9398	7.69461	-20.5397	-7.15779	-4.5663	3.0107	-13.5921	-2.87387	13.0301	-21.8066	1.53212	-7.75908
	8.79977	11.9894	-25.2742	-4.22313	-6.87566	-6.78415	-4.47918	-5.30085	-4.30277	-18.5047	-13.6923	-12.5469	-18.1557	-5.96129	-10.7544	-3.13888	4.75544	15.9843	0.523488	-21.5735	-7.28184	-7.94474	8.66968	-20.0477	-10.4129	-1.88772	-17.0705	-17.1894	-7.29724	8.30465	-16.3138	-0.824478	16.4014	-7.19707	-34.6286	-10.4733	-13.5047	-32.23	-11.8839	-28.8965	-14.5112	-8.69052	-8.62499	-5.72401	-10.2248	-0.862692	-12.7109	-10.1808	-14.4562
	1.29396	2.998	-20.0206	-0.264976	-9.92775	15.8755	-1.51838	0.348878	10.4132	-12.6116	-8.30455	-7.58003	8.35705	-5.81895	-8.06295	6.03727	-7.33547	28.2294	-10.3549	-7.09534	3.14235	-4.43125	-0.971876	-5.55548	-5.82182	-2.42413	-7.90718	-10.2813	-7.83662	24.4756	-11.3491	-6.07941	3.06069	-4.18322	-28.2322	-8.75086	-11.053	13.1342	-15.4428	-14.2435	-14.9325	-10.3688	-0.32833	-1.97778	5.78596	0.266367	-14.103	-6.99352	-15.4594
	2.19502	18.451	-29.204	17.1124	-27.4016	2.38577	0.343022	-6.0436	5.91326	-25.1821	3.26552	-11.3854	8.3004	-1.73897	-24.1832	4.72687	-2.99275	13.8695	-13.6275	-30.1143	-7.57184	-2.52217	-13.5005	-15.3923	-24.8629	1.68637	-18.5476	-15.8622	-19.8365	8.78217	-18.4526	18.9623	3.63794	-8.76022	-28.718	-4.09023	-15.4329	-10.1998	-20.6776	-30.2208	-18.5459	11.0104	-0.380343	-9.53043	-1.28555	-5.22104	-7.32754	-5.70205	-13.6359
	-11.198	8.65895	-28.7892	-6.31214	-3.22994	1.07912	-0.208686	-19.1711	10.6412	7.28532	-6.99419	-13.4783	-19.3041	4.63384	-15.8168	5.76567	-23.09	6.47697	-9.52796	-19.7506	-4.7873	-8.17206	-3.09269	-13.5681	-16.3584	-12.4381	-12.0611	-22.155	-16.7949	-1.45538	-20.4572	1.35972	9.44231	-19.7867	-59.7827	-18.3696	-15.8615	-21.2259	-20.3348	-34.1562	-10.0303	-16.0258	-8.49668	-3.36524	-3.08584	-6.73547	-24.4987	-16.5803	-1.61587
	10.5563	-15.5034	-11.488	-9.60163	-14.8006	5.75169	-0.96463	11.4407	7.60907	-2.68858	-14.2247	-10.4316	-12.779	7.73211	7.67925	6.72134	4.96747	2.36897	6.53964	-3.37225	3.36778	-7.27078	8.65037	-11.7352	-8.64771	-9.20721	-16.1311	-12.1195	6.78986	32.6838	-7.95516	15.3969	19.1977	0.402483	-31.1847	-4.96091	4.44494	-36.7345	-0.404593	-15.0573	7.71563	-15.3099	2.29138	7.14064	-4.62486	3.72324	7.55924	-8.52654	-9.08147
	-7.02193	-0.765004	-25.5456	-6.20381	-24.8856	-16.4219	-37.6003	-13.0038	-6.83391	-9.71566	-17.7919	-23.5951	-27.6355	-24.6751	-29.3235	7.40994	-2.98898	-31.1706	-18.3359	-8.90127	1.32584	-21.9572	-13.5014	-15.8207	-23.3133	-15.2016	-14.2479	-23.99	-12.3473	14.6135	-20.6205	7.7722	10.9465	-13.7822	-43.5325	-13.1075	-19.6807	-24.5603	-5.28755	-28.3162	-14.3504	-19.7892	-13.4721	-10.646	-16.7377	-2.65961	-12.1049	-12.5454	-15.6756
	56.4506	60.3509	34.8126	50.4961	16.3989	36.222	37.0731	27.766	43.7098		37.9929	36.8726	22.4374	12.3072	46.3364	49.7864	41.9703	26.7514	8.31318	29.9377	42.5343	37.0535	56.2173	23.2534	48.2774	23.8587	32.9503	28.3884	39.1251	23.7845	41.3351	65.0263	37.6754	51.1467	19.948	26.9024	42.9787	-24.6021	29.7292	30.1095	66.0543	19.7496	48.5714	38.9198	44.1399	48.4623	54.7331	64.483	47.0372
	20.3563	29.2838	10.1721	29.8153	16.4696	19.1453	34.0619	17.2454	33.9476	10.6455	10.046	27.1736	6.67823	14.4285	19.7292	34.0351	0.524569	22.4368	16.9333	8.43117	24.8465	32.3415	20.9701	14.577	29.9807	11.877	16.0459	2.30064	24.7327	34.4373	-2.01472	26.3619	51.609	26.6916	1.92615	28.0904	17.9346	-23.3243	17.7869	-3.61637	8.58906	11.6446	19.2938	15.8321	19.4743	36.269	22.5375	20.7742	10.2431
	6.00722	0.628242	-25.5563	-6.37588	-10.2047	-33.6437	-22.9888	-12.7518	4.77641	-5.66575	-35.2097	-6.71223	-10.8408	-14.03	-1.14096	13.5249	2.89685	-7.41236	-19.6945	-14.473	-5.16096	-26.5336	-14.0597	-7.36326	-20.792	-3.75683	-13.2437	-10.0136	-9.57363	-2.9292	-20.2509	-3.37629	6.24887	-9.58343	-36.2889	-11.1564	-3.15714	-26.7478	-12.2257	-28.3541	-19.7869	-6.46959	-9.23167	-2.16266	-0.624916	2.99429	-5.37468	-15.8397	-18.6547
	0.318435	0.620258	-0.677054	0.301394	-0.609281	0.0353035	-0.120638	-0.0203777	0.48602	-0.0720202	-0.352189	-0.134514	-0.133678	-0.278027	-0.154141	0.843703	0.0304171	0.154949	-0.0286678	-0.298994	0.207318	-0.242578	0.170843	-0.295923	-0.158418	-0.105954	-0.396155	-0.561617	-0.139817	0.689214	-0.537892	0.674571	0.788613	0.0103412	-1.33442	-0.157078	-0.258916	-1.02476	-0.268168	-1.06908	-0.105681	-0.163125	0.250313	-0.0719417	0.150939	0.464508	-0.0214186	-0.0157964	-0.0515251
	adventurous	affectionate	ambitious	arrogant	big-headed	bossy	brave	chatty	cheerful	childish	clumsy	confident	creative	cruel	defensive	determined	dishonest	easy-going	enthusiastic	frank	friendly	funny	fussy	generous	grumpy	gullible	hard-working	helpful	honest	imaginative	impolite	inconsiderate	indecisive	inflexible	insecure	intelligent	jealous	kind	lazy	loyal	mean	meticulous	modest	moody	narrow-minded	nasty	optimistic	outgoing	patient
	-11.6897	-12.2013	6.42133	14.1351	-9.03304	6.4478	-18.2809	-20.067	-2.02077	10.7162	-3.57577	-28.1159	34.5586	-18.9698		-20.9612	11.8568	-6.81292	-14.7915	8.08458	24.3361	-32.0384		1.87581	-5.37342	-18.0014		-32.5374	-27.6354	-24.9927	-2.50767	-27.7463	-22.3639	-21.5666	-18.6392	-5.12386	-13.1712	-0.626412	32.6909	-30.3972	6.80553	-36.0447	16.6123	8.28485	-1.31446	-0.365209	-24.2758	-9.42747	-14.6996
	-17.2995	-11.6373	-3.93644	-19.2892	-1.67148	15.08	-8.61884	10.9612	0.919317	24.4393	-9.68232	-1.53064	15.5178	-7.96395	-24.4909	-8.9658	-7.02938	-9.70374	12.1429		11.8084	16.925	-14.5119	-5.65861	-26.9845	13.0446	-30.6266	-2.12297	-11.753	-7.24721	10.003	2.99811	0.570246	-12.1984	-2.90427	-2.65514	-15.9468	23.3782	24.293	6.23374	0.162811	19.8003	9.41396	-14.3977	-20.7854		-2.53953	-1.5466	-11.7777
	38.812	46.9025	37.136	26.3007	65.6503	40.4117	30.4396	43.7514	70.3835	41.7827	53.5373	31.9486	35.9488	39.2935	36.4677	46.7417	54.8073	52.1894	49.7158	29.581	40.8116	37.7802	49.8565	51.1578	10.9547	37.5932	62.4625	60.0442	50.2226	35.598	65.6576	54.1575	37.5942	60.9116	51.2825	45.7875	32.5958	38.8624	28.8047	58.0913	32.1027	58.76	44.2529	22.5072	36.4314	45.2165	27.9053	44.5398	50.3877
	-10.5448	-11.5814	3.82935	-8.1269	3.01192	2.48261	1.17871	2.58785	7.66787	-16.1129	-31.5885	-27.6999	-6.5048	-24.1888	-25.1985	-20.5931	4.05583	4.80407	-2.24773	-4.72602	4.17978	0.727579	-12.0712	-2.93314		-1.8038	-8.38534	0.691679	-10.4617	2.56193	-26.9621	-29.8633	-35.4322	-9.01273	1.02431	-11.2736	-10.7122	-3.22755	12.1768	-9.74186	-37.5417	-33.3027	-1.79752	-8.06992	-14.7741	-23.6944	3.0866	25.7219	-9.43486
	-43.7818	-21.084	-61.1641	-53.4368	-48.0071	-22.3583	-34.2913	2.25293	17.7496	-41.8092	-32.0285	-49.7822	-46.3134	-60.5755	-54.9972	-43.6461	-30.0181	-52.1432	-63.0527	-6.88273		-42.9613	-11.8261	-58.5785	-32.9538	-3.207	-19.0017	-53.673	-20.3366	-26.548	-56.4815	-58.0142	-52.6416	-34.823	-51.986	-6.27046	-48.1357	-18.2938	2.91875	-54.2465	-43.7502	-48.2953	-68.6528	-44.8305	-35.5549	-42.4181	-31.3262	-42.4839	13.0755
	10.35	0.375813	0.580062	26.5428	23.0157	21.6143	-3.02353	1.80661	-1.08152	44.5416	12.8573	21.37	14.2688	18.1743	-43.5676	6.20599	-25.3347	25.5848	7.83905	-0.738161	17.7194	5.66403	5.75571	18.3116	10.5249	-13.3758	11.84	-14.9819	27.9096	-1.95463	11.4727	-19.0174	17.0395	1.55607	11.3772	-8.42482	11.6405	2.41539	-22.0594	0.898104	14.6556	7.23563	4.86336	16.5994	11.7434	6.99059	9.03044	12.9672	-3.2433
	10.2446	40.2172	16.6503	30.6059	16.3159	26.6382	12.8424	42.9906	50.6007	36.7802	38.6955	29.4904	37.4849		21.6068	46.9201	20.4606	47.4375	12.8416	27.0329	15.0598	13.3496	32.4336	23.8774	8.22468		3.30397	36.7079	27.6157	40.4151	25.1308	16.1084	30.1764	21.4936	18.9481	7.13955	56.7676	24.2811	11.8419	40.9776	42.6066	59.1813	14.322	10.5401	29.0653	25.9738	42.7653	13.3141	22.8645
	-5.8813	62.9273	11.6622	33.8217	5.30233	-10.4929	-7.9723	37.313	25.5072	34.7888	19.5312	29.4711	44.5713	10.987		3.94875	9.25547	8.61183	-2.86398	23.8012	18.347	11.7628	1.61041	-6.08771	23.6991	8.98035	6.07698	10.1255	20.7618	27.575	24.058	11.6107	19.9287	-15.9063	33.3587	0.284016	16.0588	12.8937	4.92875	5.55539	-6.63373	42.4222	-4.09423	13.0203	8.6516	1.74891	-5.51151	22.8834	22.3151
	7.5875	17.7776	5.56731	2.48544	1.66081	3.73815	-12.0851	5.91169	-5.47266	12.9055	-8.1633	-3.89211	8.13799	3.83653	0.758558	-5.48184	-6.14398	5.05436	-0.877095	-20.4906	-0.262917	-1.72596	-5.4579	-4.02522	-34.1333	6.98361	-11.9694	14.9289	0.2681	7.42382	-3.15659	-7.6105	5.2398	-2.4919	1.56442	2.23469	7.46783	15.4074	-25.5754	3.56804	-8.63505	13.6883	0.286773	-1.70021	12.8918	-3.95426	4.08996	-1.35972	4.89056
	30.5105	5.82529	2.98789	27.4878	-2.35398	-0.945363	24.9776	1.07715	41.833	30.59	-5.78582	10.8538	-9.56427	3.45899	18.4036	19.6499		16.4784	6.10843	28.0153	27.6389	19.0917	26.8609	29.8694	15.6576	44.3822	-12.7004	19.6561	21.8254	21.329	20.8931	33.317	28.1669	5.75452	-4.43426	17.6435	24.978	-8.35893	39.0668	30.9089	10.6138	-19.6497	9.3826	-18.209	15.87	10.3282	1.42712	8.07656	3.87841
	48.4125	6.90379	14.3712	2.67114	31.4722	24.4886	-6.09485	10.8064	13.3284	24.9727	14.3456	9.68959	21.2679	-7.69924	2.74107	-8.60787	17.6135	52.6987	6.47928	25.8744	0.184577	-5.1446	-2.58756	-0.0886106	42.7743	-3.01313	-2.63803	5.22654	20.4883	33.2396	0.807407	34.4742	10.0956	7.68923	0.880987	51.7717	50.2094	59.0102	6.58961	16.9728	34.954	0.931778	27.8047	-11.1949	24.1549	4.07095	-0.263878	18.5285	9.27636
	-12.1497	26.6832		-3.54993	-0.528956	-9.69175	-13.1255	38.0126	0.534826	-17.1421	34.5066	-9.58826	41.3045	33.3614	19.2788	-6.22052	28.2497	-3.72581	11.1136	21.2668	33.8401	10.3994	0.347185	-0.925722	-5.62918	-5.67306	16.153	-8.20185	9.84013	31.2182	15.6064	43.6729	7.62775	-14.7792	9.50423	29.7734	21.4857	30.4687	3.90868	4.95461	15.9755	-23.843	24.545	26.9283	4.85081	-3.51759	26.8364	-7.13344	36.9308
	-13.1845	-3.5308	3.3075	-5.74578	-21.7111	-7.47686	5.06943	11.245	17.0797	-2.01711	3.70017	-1.94514	0.170191	1.62842	-38.9981	-1.73041	1.71581	15.1232	8.25619	-18.4077		9.37319		1.16724	-2.65402	-2.07938	-10.4869	-2.92733	-10.932	8.74597	-12.338	6.58202	9.28954	6.05416	-7.24808	-4.13975	-1.86267		-14.5425	1.38956	-9.86562	-8.95634	-1.30043	12.4119	-19.951	-16.4562	4.85597	-9.44981	2.81953
	-2.66242	-11.5305	4.39838	-2.07241	-24.1569	2.70181	-23.694	9.67739	-38.7876	22.7035	5.27098	-11.593	11.2871	-5.23114	-20.6152	6.63109	10.3648	4.35567	18.5346	-5.57053	-4.31299	11.0017	7.84706	30.9688	-5.74659	-7.10084	6.44273	8.46143	6.45866	19.3696	23.8966	0.917839		4.88383	-19.5996	13.3366	11.5293	10.9292	-3.18151	-13.3658	-20.3115	12.2453	15.7182	-7.25907	5.55696	-34.4971	-5.22275	9.43513	-22.6172
	-29.6264	-6.39971	-7.46317	-24.8989	-6.09863	-10.8114	-41.6792	3.64977	-0.0643736	-19.7032	2.00955	-9.5263	12.2624	-28.9382	-31.4108	-5.32732	-15.3338	-14.4943	-12.5257	-21.2801	-0.887347	-27.083	-22.5818	-22.148	-19.8086	-21.2716	-5.44088	-18.7279	5.99804	-9.51636	-5.41428	-24.4259	-19.4498	-9.45997	-7.62124	-6.59603		-8.97883	5.92145	-2.89016	-8.47407	-2.39297	-3.24608	-25.8797	-10.4861	-1.3367	-5.20257	-29.1883	-9.09303
	28.2008			66.3301	70.5649	52.2076	15.9481	33.2368	42.4491	52.3011	44.7522		32.0231		49.0874	57.6233	16.4774	21.6669	52.6514	52.4599	60.7208	63.406	62.8011	46.8235	11.0997	36.3398	45.332	46.0176	31.9438	22.9816	30.9137	31.9021	34.8002	51.0656	14.3399	54.7982		32.6139	29.3698	25.2547	15.2145	30.6972	62.9053	31.0835	47.4165	53.0655	20.0746	37.3512
	31.9733	34.2908	21.1393	37.9574	12.212	38.6629	30.7633	27.7147	28.0205	35.4766	25.1899	43.0369	24.4885	30.9413	28.8035	23.0851	37.2202	43.2056	24.5754	31.9438	16.694	38.2123	28.8788	37.4963	48.2565	29.884	15.9835	49.4179	35.4984	38.1574	42.7049	31.0747	43.3742	38.5339	32.9559	49.961	86.2527	83.3376	52.388	21.8272	48.933	38.0969	71.457	23.5642	57.2304	21.3513	51.6659	39.0524	66.85
	8.57754	11.7369	13.6533	-18.1959	6.61877	-13.9112	-7.61639	5.21642	3.39513	17.2495	-1.37807	2.99644	17.5915	-12.1817	-5.74223	-16.3847	-4.20626	12.2355	2.37465	-22.4927	-15.07	2.95879	-0.635055	18.4571	-2.15558	-19.7487	5.18015	-15.9249	-19.83	14.6848	14.2993	19.415	-4.67895	7.27263	3.37431	-18.7169	14.6093	-6.98649	-10.3494	-14.5169	-9.55928	18.1236	12.8664	16.803	-22.6356	-16.3002	-13.8552	-4.90919	-13.2517
	0.188468	0.487987	0.192057	0.369506	0.339621	0.441072	-0.153508	0.744846	0.755672	0.812398	0.450539	0.0977316	0.801392	-0.0668521	-0.188536	0.202464	0.344476	0.618238	0.322984	0.409642	0.696687	0.36583	0.407555	0.443221	0.0993122	0.227591	0.198682	0.283835	0.438561	0.647337	0.496065	0.332091	0.303713	0.236047	0.183828	0.582026	0.677128	0.797572	0.497753	0.254093	0.214592	0.357494	0.653721	0.139449	0.35656	0.0727944	0.287612	0.351033	0.414364
	adventurous	affectionate	ambitious	arrogant	big-headed	bossy	brave	chatty	cheerful	childish	clumsy	confident	creative	cruel	defensive	determined	dishonest	easy-going	enthusiastic	frank	friendly	funny	fussy	generous	grumpy	gullible	hard-working	helpful	honest	imaginative	impolite	inconsiderate	indecisive	inflexible	insecure	intelligent	jealous	kind	lazy	loyal	mean	meticulous	modest	moody	narrow-minded	nasty	optimistic	outgoing	patient
	-29.0271	-7.65354	-12.5548	-10.6231	1.73485	-3.06173	-11.0764	-4.48786	1.85244	-8.8621	-11.8499	-8.67694	-11.0371	-15.7573	-15.0955	-11.8697	-8.4853	-12.1232	-6.42898	-9.34778	-8.3169	4.40826	-6.94918	-1.75357	-8.85583	-18.9563	-15.0906	-20.3336	-9.95514	-15.1584	-13.4346	-3.48887	-10.0662	-12.4263	-9.71783	-4.55797	-5.65681	-9.61151	-20.1861	-11.7142	-15.5104	-4.70573	-7.96189	-16.6296	-10.783	-17.4491	-2.41508	-7.89623	-7.84046
	-32.2236	-12.3366	-19.3579	-13.744	-6.41173	-4.09743	-16.2102	-16.222	-20.6094	-8.12818	-19.2271	-11.0198	-17.829	-7.66824	-19.8574	-16.7464	-9.46062	-16.9838	-13.8897	-19.9431	-17.7859	-18.4515	-12.6407	-16.134	-19.7316	-12.1966	-35.938	-17.1302	-10.4528	-19.6788	-11.152	-22.1379	-10.7946	-9.60331	-7.75226	-20.0167	-14.4045	-13.5529	-12.5344	-15.9751	-11.137	-13.7478	-24.7237	-23.0752	-14.6459	-8.98815	-14.2048	-15.0093	-3.69611
	4.66172	11.1968	20.7424	14.5929	30.1814	18.7568	22.8556	16.2378	7.42339	9.69187	8.51889	10.6305	1.26573	32.5014	12.1729	21.8984	25.4825	16.8542	10.4079	22.1616	6.95996	14.0257	17.7319	18.0317	20.5576	21.9752	5.89933	20.6497	21.9344	20.9322	23.5276	8.11231	18.5227	20.7659	19.6973	15.0492	12.8887	10.7986	0.50403	11.1124	14.5054	17.8168	12.2494	5.10467	23.6545	24.4531	12.0493	17.0026	19.1413
	-40.5888	-52.2173	-31.304	-38.0214	-24.3859	-27.3918	-39.0943	-37.4	-34.6879	-21.2224	-25.7508	-41.3889	-46.8899	-40.1755	-42.5279	-41.6722	-34.4114	-38.9051	-34.6187	-31.1249	-36.3789	-32.4607	-32.4322	-32.0968	-32.354	-31.6714	-44.7152	-38.379	-39.7174	-36.465	-36.6016	-38.368	-33.2197	-22.3415	-28.1216	-37.0001	-46.4114	-38.3709	-43.9624	-35.5873	-34.3716	-31.8527	-33.6605	-48.787	-35.2005	-35.9472	-36.8663	-33.6492	-23.22
	-19.5259	-22.5654	-7.40121	-11.7505	-7.00685	-7.712	-15.3325	-12.5419	-7.98162	-18.45	-14.8185	-8.68029	-17.2771	-14.8759	-24.5471	-14.6824	-9.35139	-9.89638	-10.655	-8.79361	-4.02168	-6.81136	-13.9992	-8.05697	-12.8279	-4.59617	-33.2434	-4.35946	-11.4981	-15.4512	-14.7093	-11.6946	-14.0969	-2.53283	-5.23426	-12.2007	-10.9436	-6.17316	-17.7784	-11.2739	-10.3764	-15.6797	-10.194	-22.7279	-12.6333	-10.9506	-5.14512	-11.8749	-10.858
	-17.8674	-20.8309	-13.1736	-15.7283	-7.46418	1.65874	-8.10355	-8.70516	-1.15766	-5.35587	-13.7952	-11.9142	-13.3995	-15.7006	-16.4021	-7.94065	-16.9763	-6.16135	-7.41411	-14.8552	-3.47017	-1.35156	-11.3402	-10.1737	-11.1858	2.36677	-18.993	-9.54876	-6.49939	-15.4757	-8.76902	-4.31647	-0.230086	-6.23561	-10.5192	-9.8412	-15.4637	-5.72939	-18.5545	-9.55731	-10.2435	-7.44578	-10.2142	-21.6561	-5.16443	-16.4479	-6.63523	-9.05098	-13.012
	-4.4187	7.758	9.43398	7.67461	20.0121	10.9069	-4.1247	6.42216	6.04126	9.33828	1.12845	2.08547	5.10639	-2.27508	0.947381	2.87534	7.49776	6.55453	9.22426	4.93744	7.57685	8.4054	11.125	20.2585	3.62664	1.91831	-4.91123	2.94198	10.3014	7.10311	4.10842	0.729564	3.34332	6.58677	8.6198	8.36321	4.53163	6.61473	1.58152	6.53588	2.21496	7.85862	3.15603	-6.09931	2.61955	11.5689	9.18405	12.5103	11.3398
	-0.514595	0.187083	1.64794	0.98966	10.5834	5.84585	4.31933	8.53967	3.9559	5.36845	-5.36813	2.44627	-1.43375	-6.79997	-2.72015	3.9003	-0.743768	2.50179	1.52338	2.61776	9.14283	7.96082	5.97155	-5.70712	-7.30729	5.59373	-3.80864	1.18266	3.02671	2.15884	-0.0309012	7.15746	-4.5208	-6.40302	6.24229	-0.93388	3.97918	-4.66407	-4.40318	-0.832212	1.38334	2.45475	8.20545	-6.55244	0.0852437	-3.76473	6.00682	1.76464	0.80079
	-26.4719	-14.5338	-16.077	-12.0601	-10.3607	-3.68143	-13.7312	-13.8207	-7.58313	-8.87861	-20.5268	-12.1084	-21.6494	-13.8189	-21.8867	-10.9215	-14.6741	-15.3203	-15.2473	-21.4075	-16.2164	-15.4839	-6.73655	-11.5781	-21.4182	4.56833	-29.0004	-16.5955	-16.5766	-15.3726	-17.656	-20.0455	-7.77659	-12.8761	-19.8701	-16.5409	-21.3548	-14.7561	-21.48	-13.3579	-18.9067	-20.1236	-14.4193	-20.7003	-15.7646	-15.1118	-7.1401	-12.63	-12.1473
	-23.9416	-15.3402	-13.0137	-6.85574	-0.172647	-1.63325	-16.1434	-6.33288	-11.0849	5.0391	-11.3704	-12.0579	-8.01168	-11.8271	-14.621	-15.593	-11.3172	-10.54	-7.32042	-7.2487	-10.2602	-5.78449	-1.08137	-10.7441	-13.1406	-1.95473	-20.8849	-6.59348	-9.7003	-10.9772	-12.3968	-11.4158	-8.23298	-7.4332	-9.514	-8.55296	-6.36429	-11.0674	-14.1492	-11.6223	-12.0283	-11.7381	-18.0445	-17.8186	-13.8704	-6.26373	-4.29504	-10.366	-10.6057
	-5.95592	-7.63638	3.89727	-1.06486	0.832114	2.53953	-8.57369	-1.18206	-7.66047	2.46072	0.852715	-1.05642	-9.73	-7.15158	2.01392	-6.30295	-7.54468	-5.66031	-5.92924	-2.58137	-5.76214	-5.90873	-0.176212	1.52455	0.0738151	-2.21981	-4.68261	-5.39956	-1.82241	-5.80574	-5.26278	8.18606	-2.95367	0.660109	3.88852	5.4571	0.536755	-5.32815	-18.2842	0.624036	4.8204	-3.95231	-2.63369	-5.67851	-2.71828	-3.34055	0.05034	2.37098	1.64838
	-10.119	-4.78352	-4.43164	0.272527	7.54631	4.54956	-3.7666	-7.08719	4.7449	4.92008	-0.461507	-1.18549	-7.0302	-6.48244	-14.4225	-6.92781	-7.96165	-2.5724	1.17772	-5.47062	2.07966	-0.900378	-5.13688	-2.75519	-17.0827	1.68637	-12.2573	-1.16148	-8.7059	-6.01898	-5.61225	3.17891	-3.77547	2.36967	8.88072	-0.144375	-6.16479	5.06508	-11.2856	-4.82519	-6.46454	2.13936	-0.563427	-17.1171	-0.314038	-10.488	-8.65587	2.72806	-3.59439
	-36.7104	-32.5637	-25.145	-29.0479	-12.6867	-17.2302	-26.4876	-25.0438	-26.2217	-21.2468	-19.8808	-30.6886	-27.5144	-22.605	-30.173	-21.4565	-22.7186	-23.279	-23.0261	-26.4702	-16.6208	-19.9382	-22.32	-18.8095	-14.9793	-12.5173	-28.9374	-27.2586	-21.8734	-30.627	-27.4732	-30.4696	-18.2399	-20.1885	-23.5857	-20.4522	-24.9818	-27.6888	-4.17794	-26.5603	-29.326	-23.4901	-15.611	-35.4062	-23.4022	-22.4522	-23.8082	-23.8458	-19.5103
	-28.7463	-5.75894	-7.60792	-12.8791	-12.5402	-8.73719	-12.3719	-12.9285	-16.0295	-8.34116	-8.86457	-19.3437	-16.9421	-16.5604	-21.79	-12.9516	-13.9328	-11.1587	-11.122	-15.116	-10.5366	-8.17197	-10.7855	-14.7971	-4.98053	-9.20721	-24.5669	-14.3388	-16.2763	-13.1675	-12.7434	-23.6519	-11.4046	-8.6623	-18.1998	-14.1432	-21.9397	-15.8042	-3.87226	-16.8948	-17.4561	-14.0889	-13.3056	-26.0355	-10.8575	-15.5498	-17.0283	-9.21024	-6.77437
	-44.2	-30.4596	-32.1713	-37.8942	-28.6816	-27.2174	-26.6107	-39.602	-28.8932	-32.8755	-36.5664	-31.7299	-37.8932	-29.3533	-46.3279	-40.7218	-30.1205	-37.4462	-31.8704	-38.6369	-37.1263	-31.3864	-29.9715	-33.1712	-31.0613	-15.2016	-44.8333	-33.3654	-30.5176	-39.8827	-24.3175	-37.8296	-34.4505	-29.0834	-31.8007	-35.4619	-34.9573	-33.6354	-47.2802	-35.2386	-36.2328	-34.7988	-37.2374	-45.2998	-29.3714	-33.7992	-28.6169	-35.1285	-29.2524
	8.988	19.469	15.6907	15.4863	12.2981	24.1593	30.9212	22.4996	19.9021	19.8831	19.1887	17.4717	19.11	15.6292	6.90707	15.5801	16.7474	23.2291	25.5381	21.9524	21.9186	28.1967	14.4154	21.5977	15.1277	23.9013	5.56663	22.807	26.9909	18.4	19.969	26.6341	19.3724	28.937	15.3304	15.9232	11.7745	21.783	8.12895	22.9704	12.0424	21.6295	16.5944	2.13595	13.7084	19.8478	28.744	11.8806	24.233
	-10.5539	-4.6093	-3.3825	-1.991	1.63433	-5.97057	-4.62257	-1.13401	-6.34932	6.37597	-6.93897	-6.59932	-5.5883	-5.41739	-6.27376	-3.13915	-5.81736	-0.373916	0.188437	-2.61254	-5.58683	-0.438401	-2.11364	-5.01328	-2.5069	11.8942	-11.8863	-1.24492	0.702506	-1.65306	-5.51048	4.64074	2.02323	-2.69202	-1.50577	-3.66431	-2.73797	-2.00423	-10.4186	-1.36126	1.72879	-3.95296	-0.838348	-9.68559	-5.48418	0.205117	1.06328	-1.44974	-0.292128
	-43.1279	-34.0683	-36.9417	-38.2148	-24.868	-28.3857	-21.6594	-25.9044	-19.8162	-24.2556	-35.6311	-32.6042	-34.7367	-34.5436	-38.9541	-26.3088	-32.6166	-31.7589	-32.735	-37.4108	-25.3648	-29.6336	-26.1822	-20.4385	-35.9849	-3.77107	-31.7493	-33.9193	-35.3	-34.4278	-30.21	-39.4689	-26.3209	-28.2001	-33.7826	-34.2647	-43.5286	-28.6173	-45.1837	-31.451	-34.8308	-31.9207	-35.9453	-40.8562	-35.328	-31.5972	-25.279	-38.3258	-34.6277
	-1.00095	-0.629851	-0.475417	-0.530164	-0.138211	-0.185284	-0.471702	-0.440815	-0.40043	-0.262607	-0.559337	-0.545611	-0.698556	-0.563561	-0.815439	-0.536056	-0.490013	-0.480667	-0.42277	-0.525973	-0.416027	-0.315901	-0.368393	-0.360602	-0.538975	-0.106633	-0.983424	-0.505685	-0.433165	-0.587687	-0.495208	-0.5118	-0.396726	-0.303774	-0.380402	-0.480506	-0.61444	-0.479839	-0.787045	-0.513912	-0.55608	-0.459995	-0.514299	-0.991346	-0.487417	-0.489098	-0.341645	-0.444943	-0.328521
[truncated: 21 more columns]

## Sheet: Sheet1
sd1.5	adventurous	affectionate	ambitious	arrogant	big-headed	bossy	brave	chatty	cheerful	childish	clumsy	confident	creative	cruel	defensive	determined	dishonest	easy-going	enthusiastic	frank	friendly	funny	fussy	generous	grumpy	gullible	hard-working	helpful	honest	imaginative	impolite	inconsiderate	indecisive	inflexible	insecure	intelligent	jealous	kind	lazy	loyal	mean	meticulous	modest	moody	narrow-minded	nasty	optimistic	outgoing	patient
变浅count	4	7	7	5	4	4	7	10	4	3	17	4	9	2	4	4	8	5	3	3	3	4	4	5	5	9	5	3	5	5	2	12	6	3	4	4	4	4	9	3	4	10	14	4	6	5	4	9	3
变深count	2	1	1	3	13	4	1	1	6	7	0	6	0	11	4	12	2	7	4	11	9	2	8	1	3	3	5	12	1	1	10	0	0	9	12	4	7	4	1	4	9	0	0	7	5	0	4	0	9
sd2.1	adventurous	affectionate	ambitious	arrogant	big-headed	bossy	brave	chatty	cheerful	childish	clumsy	confident	creative	cruel	defensive	determined	dishonest	easy-going	enthusiastic	frank	friendly	funny	fussy	generous	grumpy	gullible	hard-working	helpful	honest	imaginative	impolite	inconsiderate	indecisive	inflexible	insecure	intelligent	jealous	kind	lazy	loyal	mean	meticulous	modest	moody	narrow-minded	nasty	optimistic	outgoing	patient
变浅count	4	9	3	6	2	5	2	5	7	4	3	4	2	2	3	9	3	5	3	3	5	3	3	4	3	3	3	1	4	8	2	9	10	3	2	3	3	1	4	1	2	5	4	3	4	6	4	4	4
变深count	4	1	13	2	9	5	4	6	0	6	8	8	8	6	7	0	2	3	5	8	3	5	4	8	9	4	11	11	8	1	11	0	0	4	13	6	9	13	9	14	9	6	2	5	4	0	9	6	9
SDXL	adventurous	affectionate	ambitious	arrogant	big-headed	bossy	brave	chatty	cheerful	childish	clumsy	confident	creative	cruel	defensive	determined	dishonest	easy-going	enthusiastic	frank	friendly	funny	fussy	generous	grumpy	gullible	hard-working	helpful	honest	imaginative	impolite	inconsiderate	indecisive	inflexible	insecure	intelligent	jealous	kind	lazy	loyal	mean	meticulous	modest	moody	narrow-minded	nasty	optimistic	outgoing	patient
变浅count	7	7	6	8	6	7	5	9	9	13	8	6	13	5	6	5	8	9	7	8	10	9	5	8	7	5	5	7	8	10	11	9	8	4	6	7	10	10	8	6	8	9	9	9	8	5	5	8	6
变深count	6	4	1	4	3	4	5	0	1	4	2	3	1	4	7	3	3	2	2	4	1	2	4	2	4	3	5	4	5	1	3	4	3	4	2	2	3	1	4	3	3	4	1	5	6	5	2	2	3
midjourney	adventurous	affectionate	ambitious	arrogant	big-headed	bossy	brave	chatty	cheerful	childish	clumsy	confident	creative	cruel	defensive	determined	dishonest	easy-going	enthusiastic	frank	friendly	funny	fussy	generous	grumpy	gullible	hard-working	helpful	honest	imaginative	impolite	inconsiderate	indecisive	inflexible	insecure	intelligent	jealous	kind	lazy	loyal	mean	meticulous	modest	moody	narrow-minded	nasty	optimistic	outgoing	patient
变浅count	0	2	2	2	4	3	2	2	1	1	1	2	1	2	1	2	2	2	2	2	1	2	3	3	2	3	0	2	3	2	2	1	2	2	2	2	2	2	0	2	2	2	2	0	2	3	2	3	3
变深count	12	9	8	9	6	4	9	8	7	5	9	9	9	9	11	9	8	8	8	8	8	6	8	9	10	4	12	7	8	10	9	9	7	5	7	8	9	8	11	9	10	9	10	11	9	9	6	8	8
sd1.5	adventurous	affectionate	ambitious	arrogant	big-headed	bossy	brave	chatty	cheerful	childish	clumsy	confident	creative	cruel	defensive	determined	dishonest	easy-going	enthusiastic	frank	friendly	funny	fussy	generous	grumpy	gullible	hard-working	helpful	honest	imaginative	impolite	inconsiderate	indecisive	inflexible	insecure	intelligent	jealous	kind	lazy	loyal	mean	meticulous	modest	moody	narrow-minded	nasty	optimistic	outgoing	patient
变浅count	158.725	231.329	249.34	155.456	108.618	181.782	209.068	267.632	142.453	121.553	630.427	118.087	267.869	51.7878	111.304	127.406	209.348	149.232	112.18	72.696	99.4907	159.028	128.37	193.209	193.017	227.61	184.429	100.063	183.116	182.564	73.6712	351.234	202.1	82.5565	135.087	137.036	148.852	130.701	203.592	109.55	120.841	284.248	433.19	135.833	160.567	192.311	150.426	245.72	73.6275
变深count	-50.5479	-19.1476	-11.6286	-35.7819	-275.081	-64.4328	-17.5661	-11.5618	-128.829	-149.957	0	-112.464	0	-260.816	-54.2552	-311.159	-29.2739	-118.912	-54.1411	-183.373	-158.083	-23.4005	-167.83	-16.1016	-35.8451	-41.9515	-71.5429	-233.753	-33.9011	-10.6059	-247.23	0	0	-210.417	-284.408	-83.5259	-130.589	-83.2995	-10.7365	-62.5847	-186.105	0	0	-177.007	-77.6525	0	-69.4734	0	-202.873
sd2.1	adventurous	affectionate	ambitious	arrogant	big-headed	bossy	brave	chatty	cheerful	childish	clumsy	confident	creative	cruel	defensive	determined	dishonest	easy-going	enthusiastic	frank	friendly	funny	fussy	generous	grumpy	gullible	hard-working	helpful	honest	imaginative	impolite	inconsiderate	indecisive	inflexible	insecure	intelligent	jealous	kind	lazy	loyal	mean	meticulous	modest	moody	narrow-minded	nasty	optimistic	outgoing	patient
变浅count	144.457	206.453	66.516	158.194	32.8685	118.374	71.1351	90.6382	156.079	86.1788	69.2485	113.663	37.0423	26.7358	90.9586	258.001	78.9476	107.271	58.8176	79.3317	147.715	85.0111	107.194	72.2937	97.6429	57.6353	68.0559	28.3884	115.53	236.362	79.4473	247.1	241.444	111.912	30.8362	68.2418	76.6281	13.1342	89.6043	30.1095	117.021	70.4121	140.43	74.3163	110.716	199.144	148.819	131.146	144.484
变深count	-46.6729	-15.5034	-315.038	-24.0547	-216.154	-93.7709	-104.801	-86.3465	0	-106.292	-195.21	-132.751	-127.066	-136.167	-134.745	0	-52.2357	-62.6978	-84.7696	-160.545	-48.763	-106.751	-54.7378	-148.098	-153.953	-89.8452	-200.443	-208.09	-139.439	-23.0261	-253.176	0	0	-74.199	-511.516	-102.298	-164.448	-375.358	-178.929	-407.4	-172.692	-94.4861	-34.1168	-88.4974	-63.1053	0	-150.158	-105.975	-138.114
SDXL	adventurous	affectionate	ambitious	arrogant	big-headed	bossy	brave	chatty	cheerful	childish	clumsy	confident	creative	cruel	defensive	determined	dishonest	easy-going	enthusiastic	frank	friendly	funny	fussy	generous	grumpy	gullible	hard-working	helpful	honest	imaginative	impolite	inconsiderate	indecisive	inflexible	insecure	intelligent	jealous	kind	lazy	loyal	mean	meticulous	modest	moody	narrow-minded	nasty	optimistic	outgoing	patient
变浅count	198.504	240.535	114.612	263.181	219.231	219.103	114.971	256.032	306.952	389.248	243.416	166.171	342.575	132.758	173.648	194.02	197.05	286.62	181.575	239.975	266.976	221.929	200.831	256.962	162.967	161.244	151.771	236.898	236.266	284.568	284.636	275.732	221.176	172.005	162.262	263.072	326.127	331.183	230.632	194.032	215.056	293.015	290.484	173.458	234.804	155.935	169.248	214.359	212.424
变深count	-138.276	-68.0345	-61.1641	-115.821	-93.8752	-57.5738	-143.156	-20.067	-38.7876	-94.7675	-63.617	-117.191	-46.3134	-144.854	-239.278	-101.585	-70.6866	-66.6375	-90.3698	-82.6711	-15.07	-102.083	-60.991	-80.7264	-113.88	-72.3976	-84.7851	-135.845	-100.949	-51.5407	-95.7816	-159.067	-129.888	-99.2735	-90.2247	-29.9906	-87.966	-18.2938	-72.5266	-112.526	-101.603	-161.135	-68.6528	-114.512	-124.187	-133.366	-69.4572	-71.6721	-62.3461
midjourney	adventurous	affectionate	ambitious	arrogant	big-headed	bossy	brave	chatty	cheerful	childish	clumsy	confident	creative	cruel	defensive	determined	dishonest	easy-going	enthusiastic	frank	friendly	funny	fussy	generous	grumpy	gullible	hard-working	helpful	honest	imaginative	impolite	inconsiderate	indecisive	inflexible	insecure	intelligent	jealous	kind	lazy	loyal	mean	meticulous	modest	moody	narrow-minded	nasty	optimistic	outgoing	patient
变浅count	0	30.6658	36.4331	30.0792	73.0749	53.8229	53.7768	38.7374	19.9021	19.8831	19.1887	28.1022	19.11	48.1306	12.1729	37.4785	42.2298	40.0833	35.946	44.114	21.9186	42.2223	43.2723	59.8879	35.6853	57.7707	0	43.4567	59.2267	39.3322	43.4967	26.6341	37.8951	49.703	35.0277	30.9724	24.6632	32.5816	0	34.0828	26.5478	39.4463	28.8438	0	37.3629	55.8698	40.7933	41.3936	54.7141
变深count	-363.104	-234.916	-199.739	-219.963	-113.523	-100.225	-198.718	-183.463	-157.343	-118.05	-209.417	-202.856	-245.168	-215.218	-306.605	-212.924	-176.768	-197.515	-173.164	-204.965	-170.29	-147.354	-159.671	-167.943	-209.766	-90.5431	-352.096	-201.32	-182.212	-246.684	-200.694	-235.082	-158.593	-125.116	-165.88	-190.08	-233.985	-183.493	-281.097	-209.675	-230.419	-197.44	-213.356	-336.109	-201.857	-209.793	-145.803	-180.83	-153.233
[truncated: 21 more columns]
