# Supplementary material
Source: ML conference proceedings conference paper supplement (https://openreview.net/forum?id=P66QvdCPjE)
Supplement: supplementary_material [file result_age_behavior.xlsx]

## Sheet: result_age_behavior
sd1.5	bathing	bowing	buying	clapping	climbing	cooking	crawling	crying	dancing	digging	diving	dreaming	drinking	eating	fighting	giving	hugging	jumping	kissing	knitting	laughing	listening	painting	playing	reading	riding	sewing	singing	sitting	skiing	sleeping	smelling	snoring	standing	talking	thinking	waiting	washing	writing
AsianFemaleElderly.png	11	6	66	21	48	42	54	60	45	72	14	5	46	5	5	6	73	43	32	78	23	36	24	16	28	20	73	22	68	19	47	21	20	40	44	37	59	4	71
AsianFemaleMiddleAged.png	26	25	25	20	36	25	26	35	23	31	42	23	31	30	6	21	22	47	58	64	32	50	33	25	38	46	57	32	27	29	26	29	37	28	31	33	38	30	31
AsianFemaleYoungAdult.png	41	23	26	25	4	50	35	48	20	47	33	30	27	31	25	25	41	36	49	32	24	34	47	8	41	53	60	40	31	56	33	29	27	44	39	32	32	36	64
AsianMaleElderly.png	43	21	29	33	21	27	20	37	28	35	19	38	36	29	24	25	30	22	23	26	27	50	41	22	35	49	75	39	26	33	37	23	23	33	27	28	48	30	49
AsianMaleMiddleAged.png	23	15	42	54	25	32	7	60	26	43	25	28	22	30	20	33	43	21	28	76	27	60	64	11	54	35	41	26	14	37	13	32	42	28	29	28	64	17	39
AsianMaleYoungAdult.png	25		44	43	25	14	13	66	28	44	27	19	24	29	6	8	20	36	27	64	28	75	24	25	54	33	67	21	38	46	20	20	28	29	38	47	64	21	29
BlackFemaleElderly.png	31		27	30	26	42	43	55	26	24	31	27	23	29	32	60	64, 26	41	25	67	31	67	58	9	15	14	56	29	66	54	21	28	36	30	42	23	71	28
BlackFemaleMiddleAged.png	26	24	28	33	22	24	50	53	30	54	23	24	48	24	22	40	26	24	29	44	36	66	45	25	63	22	61	32	66	31	39	31	41	23	60	29	55	34	41
BlackFemaleYoungAdult.png	36	46	26	27	21	30	22	68	23	40	19	26	42	33	23	29	29	29	23	32	30	29	30	26	37	36	29	25	21	36	24	27	33	27	25	27	32	30	34
BlackMaleElderly.png	27		25	23	29	39	25	53	32	25	20	23	31	24	19	30	27	30	26	62	20	31	28	49	37	27	23	25	30	26	24	31	23	29	23	27	59	38	30
BlackmaleMiddleAged.png	26	38	29	21	27	27	24	38	26	23	19	24	25	28	24	47	23	28	21	49	26	35	22	33	32	44	28	28	24	32	24	27	25	23	26	25	25	34	25
BlackMaleYoungAdult.png	23	16	32	24	27	21	18	42	25	22	28	20	30	25	19	24	26	25	21	25	28	24	26	21	23	15	63	21	11	56	27	28	46	22	30	27	23	25	37
WhiteFemaleElderly.png	8		6	3	6	23	4	36	5	3	7	9	63	8	16	43	26, 31	22	21, 41	7	22	78	58	5	29	3	42	54	3	24	5	23	58	4	74	52	75	5	61
WhiteFemaleMiddleAged.png	35	29	24	28	20	37	32	55	27	43	43	21	51	36	7	22	24	40	44	66	33	55	53	29	40	34	51	45	22	47	24	25	36	27	33	25	42	27	36
WhiteFemaleYoungAdult.png	30	9	20	22	37	34	26	56	31	53	20	24	47	44	21	52	43	30	34	46	30	42	48	28	46	49	46	30	29	37	31	38	28	43	29	35	28	50	48
WhiteMaleElderly.png	14	46	20	74	18	51	30	26	28	57	66	65		4	71		63	49	28	7	27	68	25	62	74	63	71	57	72	60	19	31	59	69	64	13	68	39	3
WhiteMaleMiddleAged.png	25	30	21	22	21	23	31	37	21	28	10	27	31	24	23	22	23	20	24	39	23	23	32	28	41	23	86	21	23	28	19	26	34	28	24	22	53	21	23
WhiteMaleYoungAdult.png	47	41	28	23	32	29	34	40	23	27	21	26	29	25	21	26	25	29, 4	22	57	21	27	28	28	23	21	41	26	24	38	24	25	30	29	24	24	38	25	22
sd2.1	bathing	bowing	buying	clapping	climbing	cooking	crawling	crying	dancing	digging	diving	dreaming	drinking	eating	fighting	giving	hugging	jumping	kissing	knitting	laughing	listening	painting	playing	reading	riding	sewing	singing	sitting	skiing	sleeping	smelling	snoring	standing	talking	thinking	waiting	washing	writing
AsianFemaleElderly.png	20	46	4	8	44	46	31	31	33	33	16	49	34	25	4	3	35	33	42	28	55	81	6	30	43	67	32	44	22	18	75	37	59	33	72	39	43	43	41
AsianFemaleMiddleAged.png	26		5	26	30	7	37	49	42		47	29	32	41	36	28			30		79	51	76	26		47		41	42	49	23	36	37	25	70	37		29	29
AsianFemaleYoungAdult.png	23	76	7	36		51	12	38	46	39	23	36			43		27	28	33	20	69	83	37	46	46, 29	50	57	25	31	35	54	70	60	66	53			32	22
AsianMaleElderly.png		69	52	72	50		33	35	33	39	3	52	30	49	33	33		31	28	49	75	80	45	33	30	80		30	73	46	43			78	74	38		38	37
AsianMaleMiddleAged.png	79	37	2	29	46	6	14	58	83	78	24		84		56	3	71	31	33		78	61	77	41	31	80	40	71	83	78	34	80	50	21	67	75	70	32	57
AsianMaleYoungAdult.png	29	24	9	47	41	19	27		21	43	36			32	32	3			29	36	60	35	22	24		53	28	53	25		20	22	49		30	36	56	43	33
BlackFemaleElderly.png	3		4	85		50			70		42	29			43				28	38	3	58	80		25	77			40	32	27	33		61	74			33	50
BlackFemaleMiddleAged.png	16	73	9	13	33	52	30	40	32	34	28	14	21	43	24		45	16	28	28	11	74	23	27	78	22	45	24	29	19	37	25	28	17	62	25	38	35	25
BlackFemaleYoungAdult.png	66	38	36	7	37	58	40	31	43	45	32	31	45		56	22		50	33		7	71	25	27	32	57	49	39, 50	39	65	54	26	77	68	72	38	37	38	58
BlackMaleElderly.png	43	51	56		39	35	30	47	34	50	40	26	30	35	29	5	52	34	42	32	28	30	41	56	22		28	49	40		26	37	78	64	52	26	49	62	38
BlackmaleMiddleAged.png	38	60	32	32	39	43	38	50	33	39	29	30	36	47	40	37	35	43	29	35	30	32	29	43	45	37	28	22	39		30	28	62	35	24	29	43	33	33
BlackMaleYoungAdult.png	29	52	25	28		30	30	36	24	36	26	26	22	32	32		33		25	41	49	23	39, 13	14	39	57			34	22	25	26	25		64	23	25	29	26
WhiteFemaleElderly.png	4		4	76		73	24	39	76	30	8		30		59	6			56		10	5	3		47	12	36		66		37	4	51	22	67	22	23	17	35
WhiteFemaleMiddleAged.png		38		41	42	67	12	28	59	32	50	24	30	34	68	3	28	56	26	60	63	73	34	70	72	79	31	62	76	6	41	60	66	67	39	28		60	28
WhiteFemaleYoungAdult.png	12	81	21	15	65	58	33	30	76	41	35	47	52	84	70	3	2	60	31	41	65	73	48	41	26	70	32	42	76	25	65	31	58	60	71	29	62	35	51
WhiteMaleElderly.png		73	66		75	53	23		78	76		30	39	27	54			73		40	79	69	32		83	70		77	75	35			55	73	67			84	77
WhiteMaleMiddleAged.png	10	86	24	14	52	38	27		19	38	33	24	42	6	37	8	66	28	21		23	67	29	28	39	45		37	36	28	25	20		4	39	49	78	23	44
WhiteMaleYoungAdult.png		84	23	7	25	67	40	38		53	22		7	21	21	14	37	31	43	25	74	46	26	56	8	59	52	20	27	57	32	24		53	72	37	29	82	17
SDXL	bathing	bowing	buying	clapping	climbing	cooking	crawling	crying	dancing	digging	diving	dreaming	drinking	eating	fighting	giving	hugging	jumping	kissing	knitting	laughing	listening	painting	playing	reading	riding	sewing	singing	sitting	skiing	sleeping	smelling	snoring	standing	talking	thinking	waiting	washing	writing
v1_img2img_AsianFemaleElderly.jpg.png	4	60	77	5		38	65	67	64	81	66	83	70	8	45	15	21		31	77	30	26	77	5	29			23	8	35	38	30	23		74	59	79	5	74
v1_img2img_AsianFemaleMiddleAged.jpg.png	48	74	60	76		79	62	75	91	83	71	61	86	75	74	83	61	62	22	72	47	42	74	71	78	73	66	36	66	48	60	58	45	73	67	78	69	68	86
v1_img2img_AsianFemaleYoungAdult.jpg.png	20	9	22	6	33	6	7	4	18		20	20	21	17	21	13	19	21	28	19	80	20	7	5	45	18	32	22	19	19	21	23	22	21	20	38	25	21	10
v1_img2img_AsianMaleElderly.jpg.png	37	76	44	30		47		98	23	58	80	56	31	71	94	64			5	49	51	67	26	76	75	83	52	25	43	21	23	29		66	58		76	51	71
v1_img2img_AsianMaleMiddleAged.jpg.png		83	63	81	72	64	4	74	70	79	19	79	67	59	51	87			25	73	30	64	71	7	77	51	74	74	86	62	80	45	76	75	87	40	75	6	72
v1_img2img_AsianMaleYoungAdult.jpg.png			72	8		50	33	72	41	75	76	20	22	65	54	75	40	73	12	76	64	44	78	7	27	65	23	85	47	46	72	78	33	81	64	78	25
v1_img2img_BlackFemaleElderly.jpg.png	22		60	21			21	76	24		46	46	72	6		65	48	27	20	75	26	77	78	23	72		16	76	80	38	96	51	43	75	24	32	55	13	76
v1_img2img_BlackFemaleMiddleAged.jpg.png	22		42	80	24	77		57			47	62	80	8	59		66	37		59	47	38	67	81	26	75	62	24	74	43	73	20	40	58	58	45	27	79	80
v1_img2img_BlackFemaleYoungAdult.jpg.png	19	20	19	25	43	18	26	56	20	24	20	20	18	20	19	22	25	39		27	50	24	35	26	20	21	26	21	19	39	19	27	44	23	22	23	25	20	50
v1_img2img_BlackMaleElderly.jpg.png	36	41	74	71	38	70	39	72	28	40	38	74	30	10	28	69	59		25	39	29	29	61	9	35	36	67	39	47	34	45	27	28	30	62	47	36	5	36
v1_img2img_BlackmaleMiddleAged.jpg.png	79	84	29	38	44	80	44	78	62	57	53	77	48	75	70	75	45	58	29	81	29	76	76	35	39	36	36	45	75	39	25	21	49	68	77	73	72	77	31
v1_img2img_BlackMaleYoungAdult.jpg.png	19	8	74	53			42	71	24	8	23	18	28	12	34	23	47		25	24	32	29	39	23	20		13	21	21	28	70	23	53	28	81	27	75		28
v1_img2img_WhiteFemaleElderly.jpg.png			80	80		9	84	79		84	32	9	41	7	82	83	30, 38			87	89	69	76	75	69		27	78	76	44	70	24	72		75	75		38	62
v1_img2img_WhiteFemaleMiddleAged.jpg.png	17	25	25	26	32	24	24	68	24	72	22	21	23	21	20	23	30	43	21	36	35	19	4	21	20	40	23	24	26	28	34	20	34	23	54	40	23	22	37
v1_img2img_WhiteFemaleYoungAdult.jpg.png	33	66	24	23	21	50	9	34	20	20	28	26	20	12	68	17	34	28		21	20	29	19	22	28	25	24	20	27	31	20	19	31	46	53	19	69	41	22
v1_img2img_WhiteMaleElderly.jpg.png		72	73			63	83	80	71	78	24	79	83	48						73	30	75	88		23	80	24	76	27	68	78	76	70	77	83	36	89		75
v1_img2img_WhiteMaleMiddleAged.jpg.png	24	75	28	21	43	21	8	82	6	74	24	69		17	80	20	39	35	24	20	25	39	39	66	30	65	20	31	34	33	70	23	32	69	77	69	75	76	39
v1_img2img_WhiteMaleYoungAdult.jpg.png	67	75	6	65	22	71	33	69	37	74	79	52	63	20	71	16	69	51	23	72	56	29	58	60	61	46	70	4	34	45	65	24	43	76	59	65	71	28	69
midjourney	bathing	bowing	buying	clapping	climbing	cooking	crawling	crying	dancing	digging	diving	dreaming	drinking	eating	fighting	giving	hugging	jumping	kissing	knitting	laughing	listening	painting	playing	reading	riding	sewing	singing	sitting	skiing	sleeping	smelling	snoring	standing	talking	thinking	waiting	washing	writing
AsianFemaleElderly.jpg	65, 58, 55, 56	63, 76, 76, 74	82, 76, 46, 74	71, 59, 76, 76	63, 64, 47, 46	65, 79, 69, 76	69, 63, 66, 64	36, 68, 34, 42	71, 64, 66, 65	62, 58, 66, 60	62, 66, 58, 63	47, 54, 52, 37	83, 77, 77, 73	61, 75, 47, 70	71, 52, 66, 46	78, 67, 66, 29	75, 73, 78, 76	51, 71, 69, 56	59, 62, 58, 56	74, 73, 77, 79	47, 78, 70, 76	77, 74, 72, 79	76, 68, 67, 57	79, 75, 85, 82	76, 73, 72, 72	35, 48, 40, 55	73, 72, 63, 56	71, 48, 72, 61	74, 71, 75, 79	54, 67, 52, 64	59, 53, 62, 29	79, 76, 32, 67	43, 32, 57, 53	78, 86, 57, 73	78, 87, 81, 77	44, 70, 73, 73	74, 74, 73, 68	75, 71, 74, 81	61, 66, 66, 70
AsianFemaleMiddleAged.jpg	78, 69, 68, 69	71, 47, 42, 54	80, 78, 77, 82	78, 77, 75, 71	68, 72, 55, 58	72, 61, 66, 65	73, 72, 65, 75	76, 72, 66, 27	53, 62, 65, 67	66, 56, 57, 58	64, 62, 64, 73	72, 56, 67, 61	81, 75, 80, 75	74, 39, 39, 49	48, 69, 78, 51	54, 54, 70, 65, 44	75, 83, 63, 64	41, 53, 43, 34	64, 68, 64, 73	81, 70, 77, 82	81, 71, 74, 63	79, 64, 73, 82	81, 78, 68, 72	88, 78, 70, 83	69, 78, 79, 60	50, 66, 57, 50	75, 74, 76, 82	79, 73, 67, 79	78, 93, 76, 79	67, 68, 45, 61	66, 73, 61, 23	74, 71, 76, 68	68, 53, 61, 68	72, 52, 51, 46	83, 75, 79, 81	67, 81, 78, 42	73, 73, 73, 74	77, 78, 69, 59	62, 72, 63, 70
AsianFemaleYoungAdult.jpg	24, 21, 24, 22	33, 28, 27, 24	21, 23, 22, 35	24, 38, 22, 19	24, 24, 22, 24	20, 25, 24, 23	34, 31, 33, 31	21, 22, 33, 21	21, 23, 21, 23	22, 25, 20, 24	23, 20	18, 18, 22, 19	26, 20, 35, 36	20, 20, 23, 24	24, 21, 24, 20	20, 22, 22, 21	19, 22, 22, 23	25, 21, 24, 25	20, 21, 22, 22	30, 23, 26, 23	26, 24, 19, 21	22, 26, 26, 29	29, 23, 54, 27	27, 29, 30, 33	25, 37, 26, 25	21, 22, 25, 21	27, 29, 25, 29	20, 23, 22, 37	29, 41, 33, 25	35, 34, 38, 27	19, 21, 20, 23	28, 21, 20, 22	19, 20, 18, 19	30, 22, 27, 22	33, 34, 38, 21	23, 38, 24, 27	35, 23, 24, 32	32, 36, 38, 34	26, 34, 26, 24
AsianMaleElderly.jpg	71, 73, 67, 70		76, 28, 68, 58	79, 67, 76, 72	60, 55, 75, 66	77, 73, 76	74, 70, 74, 70	73, 61, 78, 40	69, 66, 73, 70	72, 50, 51	63, 48	71, 49, 60, 72	75, 81, 79, 81	75, 76, 79, 80	64, 59, 61, 65	79, 75, 85, 81, 27	76, 64, 40, 60	54, 64, 65, 71	67, 66, 69, 49	75, 77, 78, 83	72, 75, 79, 68	76, 77, 92, 80	74, 75, 42, 34	76, 77, 74, 81	69, 76, 76, 72	51, 63, 51, 52	81, 80, 90, 75	50, 76, 75, 88	78, 70, 76, 73	77, 63, 59, 60	71, 28, 69, 31	76, 84, 86, 74	60, 62, 75, 67	76, 65, 36, 58	84, 81, 81, 80	76, 81, 77, 80	60, 68, 77, 72	69, 44, 29, 58	72, 71
AsianMaleMiddleAged.jpg	68, 77, 73, 62	70, 75, 72, 74	50, 48, 85, 37	81, 75, 73, 45	89, 77, 52, 68	78, 78, 78, 78	74, 71, 67, 71	76, 69, 67, 38	74, 73, 65, 69	61, 61, 59, 76	66, 56, 64, 60	69, 57, 71, 58	76, 80, 80, 81	52, 64, 82, 79	83, 63, 68, 61	91, 86, 69, 73	91, 71, 81, 65, 49	38, 55, 53, 54	68, 70, 71, 74	77, 76, 83, 71	77, 74, 78, 75	74, 74, 66, 80	75, 78, 72, 70	72, 79, 81, 75	75, 77, 80, 82	63, 47, 58, 60	76, 76, 84, 76	76, 80, 43, 76	77, 86, 88, 74	52, 63, 50, 57	71, 72, 44, 66	81, 65, 33, 35	56, 78, 58, 57	75, 75, 52, 55	79, 83, 74, 81	79, 76, 76, 70	73, 71, 74, 74	78, 69, 76, 54	80, 78, 83, 78
AsianMaleYoungAdult.jpg	35, 34, 42, 34	50, 34, 53, 42	56, 48, 44, 54	49, 47, 55, 49	53, 41, 65, 34	27, 44, 50, 47	37, 39, 37, 42	34, 24, 25, 32	37, 37, 31, 42	53, 26, 29, 28	29, 41, 34, 36	32, 21, 28, 27	42, 52, 43, 48	27, 39, 48, 33	50, 48, 47, 32	32, 35, 47, 49, 23	56, 47, 35, 36, 23	27, 26, 37, 31	37, 38, 26, 43	45, 47, 45, 46	38, 55, 24, 55	52, 56, 50, 55	37, 49, 55, 43	56, 51, 47, 45	54, 58, 53, 49	20, 23, 22, 26	47, 44, 30, 34	61, 31, 59, 46	56, 47, 44, 51	40, 36, 30, 25	50, 36, 18, 38	35, 55, 39, 21	41, 39, 26, 47	56, 24, 57, 33	51, 61, 53, 54	49, 58, 51, 49	51, 47, 49, 44	47, 47, 48, 49	43, 50, 30, 31
BlackFemaleElderly.jpg	69, 72, 66, 62	62	78, 69, 45, 52	70, 78, 69, 78	74, 63, 52, 38	76, 64, 68, 72	73, 71, 76, 69	28, 66, 52, 45	65, 64, 64, 68	64, 61, 57, 66	54, 69	72, 63, 71, 72	64, 74, 86, 79	59, 82, 82, 53	49, 54, 65, 79	57, 61, 67, 66, 72	64, 68, 45, 50, 66	62, 66, 59, 65	71, 70, 71, 68	61, 81, 77, 75	73, 68, 65, 65	79, 73, 79, 73	68, 38, 71, 71	76, 74, 81, 79	83, 77, 82, 78	30, 55, 54, 54	76, 72, 70, 73	46, 61, 74, 44	77, 78, 71, 75	51, 63, 49	71, 71, 74, 45	71, 73, 71, 42	27, 58, 71, 64	71, 55, 74, 30	76, 78, 79, 71	60, 73, 77, 70	67, 78, 69, 72	75, 67, 39, 70	74, 74, 76, 62
BlackFemaleMiddleAged.jpg	51, 54, 58, 44	63, 60, 52, 63	50, 57, 70, 40, 52	68, 66, 69, 67, 39	53, 48, 51, 64	67, 69, 67, 66	49, 51, 54, 54	51, 30, 54, 61	62, 58, 55, 52	53, 63, 47, 61	55, 60, 62, 53	71, 74, 59, 57	62, 72, 69, 58	55, 64, 74, 41	55, 48, 57, 32	43, 50, 51, 71, 47	48, 55, 60, 55	57, 37, 50, 40	49, 59, 64, 60	60, 69, 69, 70	58, 55, 35, 52	65, 74, 71, 73	65, 52, 76, 70	35, 72, 74, 70	59, 63, 68, 66	43, 34, 29, 34	69, 68, 65, 60	46, 63, 72, 66	69, 66, 65, 67	44, 58, 60, 48	25, 62, 63, 35	57, 71, 37, 31	61, 61, 68, 65	69, 67, 52, 50	74, 71, 74, 66	57, 75, 59, 79	67, 68, 70, 69	34, 42, 33, 58	40, 64, 61, 62, 59
BlackFemaleYoungAdult.jpg	55, 50, 51, 40	41, 54, 49, 56	45, 31, 55, 34	39, 43, 56, 62	44, 40, 45, 38	62, 50, 55, 51	48, 43, 47, 45	33, 42, 33, 47	45, 45, 37, 51	33, 44, 46, 34	40, 38, 49, 41	29, 58, 51, 51	51, 64, 62, 54	55, 63, 60, 34	35, 45, 52, 33	40, 32, 34, 36, 40	38, 59, 55, 49	35, 34, 31, 49	48, 50, 49, 39	60, 61, 55, 57	38, 46, 39, 43	59, 55, 51, 35	52, 43, 51, 59	62, 45, 65, 47	47, 51, 49, 48	28, 29, 34, 37	33, 45, 48, 55	46, 31, 43, 27	59, 65, 61, 60	38, 38, 42, 46	52, 49, 46, 49	33, 44, 57, 23	33, 51, 50, 51	64, 64, 35, 66	61, 44, 49, 68	58, 30, 56, 32	49, 35, 57, 47	61, 56, 45, 48	36, 40, 44, 39
BlackMaleElderly.jpg	65, 58, 66, 72	55, 57	85, 45, 54, 46	80, 74, 81, 81	80, 75, 76, 58	77, 72, 80, 82	74, 78, 73, 80	53, 65, 29, 35	64, 74, 79, 65	44, 78, 54, 64	36, 50, 35	57, 40, 48, 32	67, 72, 77, 78	77, 43, 41, 81	37, 66, 82, 82	81, 82, 88, 81, 54	82, 35, 80, 27, 44	49, 48, 70, 63	58, 57, 79, 55	91, 82, 79, 85	80, 82, 83, 60	77, 54, 78, 78	77, 86, 83, 69	79, 77, 82, 76	80, 83, 87, 86	59, 35, 52, 28	87, 82, 80, 85	53, 83, 70, 82	73, 82, 79, 80	64, 57, 71, 50	72, 78, 79, 30	57, 63, 79, 35	32, 80, 75, 56	93, 74, 26, 78, 40	86, 83, 79, 79	81, 78, 43, 79	75, 78, 76, 81	86, 86, 81, 21	76, 77, 77, 65
BlackMaleMiddleAged.jpg	34, 43, 39, 38	47, 43, 40	48, 47, 63, 41, 52	37, 37, 45, 37	50, 37, 37, 37	43, 33, 42, 45	39, 32, 42, 42	34, 45, 35, 23	41, 42, 48, 38	50, 34, 37, 42	40, 46, 31, 44	36, 33, 30, 35	49, 48, 53, 46	29, 28, 24, 39	39, 36, 37, 41	38, 45, 40, 32, 22	47, 44, 48, 26, 30	40, 34, 27, 32	33, 30, 39, 42	36, 45, 39, 40	31, 36, 38, 48	35, 41, 43, 53	37, 28, 47, 34	49, 50, 44, 53	40, 49, 53, 58	26, 30, 36, 30	41, 40, 46, 46	39, 33, 28, 30	62, 61, 62, 61	35, 42, 39, 45	49, 46, 40, 45	37, 47, 28, 37	28, 25, 42, 50	32, 48, 55, 39	43, 45, 53, 51	51, 50, 36, 43	40, 40, 57, 52	48, 50, 47, 47	39, 30, 31, 30
BlackMaleYoungAdult.jpg	29, 25, 23, 25	23, 25, 28	59, 21, 18, 30, 27	44, 21, 37, 28	35, 28, 23, 25	33, 32, 38, 37	23, 33, 34, 31	23, 38, 21, 26	23, 27, 27, 23	35, 27, 29, 28	29, 35, 26	21, 28, 22, 22	53, 54, 55, 59	64, 21, 37, 21	33, 81, 27, 43	25, 29, 37, 30, 20	45, 47, 56, 58	22, 28, 23, 25	27, 27, 26, 26	54, 42, 31, 43	43, 59, 34, 40	61, 65, 47, 69	55, 60, 20, 46	46, 21, 61, 32	41, 49, 53, 53	19, 24, 21, 22	38, 36, 48, 40	44, 32, 40, 57	65, 52, 57, 51	43, 27, 25, 25	47, 48, 45, 19	31, 50, 19, 27	45, 30, 34, 28	31, 46, 24, 22	77, 60, 61, 62	52, 36, 32, 25	35, 54, 30, 27	44, 46, 41, 21	28, 38, 42, 27
WhiteFemaleElderly.jpg	65, 60, 63, 63	77, 61, 75, 59	75, 78, 43, 48	72, 76, 66, 42	50, 63, 48, 58	75, 70, 66, 72	69, 68, 72, 67	37, 61, 70, 48	55, 60, 64, 65	59, 68, 57, 56	56, 50, 57, 48	54, 61, 50, 52	71, 73, 67, 65	73, 48, 70, 74	66, 49, 68, 57	75, 63, 66, 74, 73	63, 71, 48, 48	39, 31, 48, 40	61, 61, 60, 65	75, 77, 75, 79	74, 79, 75, 70	75, 65, 73, 63	66, 67, 72, 70	82, 75, 76, 34	78, 72, 70, 66	47, 28, 52, 42	77, 79, 82, 75	39, 78, 76, 60	68, 65, 65, 32	48, 50, 51, 51	71, 58, 56, 86	69, 68, 39, 23	63, 56, 64, 53	39, 58, 75, 33, 70	69, 70, 71, 72	66, 73, 75, 67	70, 69, 59, 71	74, 76, 65, 72	77, 79, 76, 53
WhiteFemaleMiddleAged.jpg	44, 41, 53, 46	63, 34, 45, 52	44, 35, 33, 31, 50	56, 62, 61, 62	72, 70, 50, 52	43, 52, 36, 59	68, 51, 42, 53	54, 40, 43, 26	42, 48, 43, 49	38, 38, 48, 58	63, 39, 41, 43	34, 41, 47, 43	58, 57, 65, 51	51, 61, 57, 64	54, 50, 52, 62	45, 46, 29, 58	51, 59, 39, 60	49, 50, 47, 40	58, 44, 45, 48	53, 62, 65, 66	48, 45, 52, 56	56, 62, 57, 59	57, 58, 48, 29	64, 64, 53, 61	65, 58, 68, 57	31, 38, 35, 39	57, 65, 60, 58	51, 69, 62, 61	71, 58, 67, 58	49, 46, 48, 54	51, 45, 46, 36	51, 46, 51, 29	56, 53, 47, 55	60, 62, 57, 45	62, 54, 58, 64	52, 58, 64, 61	55, 54, 42, 45	63, 40, 47, 44	63, 67, 44, 42
WhiteFemaleYoungAdult.jpg	25, 32, 29, 30	26, 36, 24, 34	35, 24, 36, 49	69, 50, 60, 60	27, 49, 39, 33	45, 45, 38, 46	42, 50, 42, 39	23, 55, 24, 20	29, 25, 28, 31	42, 23, 26, 25	24, 27, 24, 22	19, 20, 19, 19	63, 57, 39, 41	61, 49, 48, 43	42, 27, 28, 23	23, 25, 34, 28	47, 32, 23, 21	27, 26, 24, 26	30, 29, 28, 26	61, 52, 51, 45	52, 51, 30, 65	64, 49, 50, 51	50, 43, 41, 33	52, 62, 58, 37	47, 49, 37, 44	21, 27, 29, 23	49, 44, 39, 37	43, 64, 37, 30	36, 51, 48, 43	70, 44, 41, 28	19, 44, 38, 26	33, 52, 28, 24	50, 18, 43, 32	58, 58, 22, 23	65, 54, 63, 52	43, 43, 37, 22	34, 47, 33, 41	45, 35, 39, 44	39, 37, 40, 50
WhiteMaleElderly.jpg	90, 74, 77, 76	41	77, 57, 70, 66, 66	77, 81, 78, 60, 54	71, 80, 71, 75	79, 68, 84, 72	77, 80, 86, 83	86, 79, 75, 75	84, 75, 74, 78	87, 89, 60, 77	80, 71	65, 65, 63, 72	88, 74, 79, 70	81, 79, 87, 78	63, 70, 74, 69	80, 78, 80, 82	45, 87, 88, 75	73, 71	66, 73, 68, 72	87, 81, 82, 75	97, 80, 93, 77	79, 91, 86, 87	82, 80, 79, 42	83, 85, 81	68, 76, 77	68, 44, 60, 70	84, 84, 85, 78	67, 86, 84, 73	81, 81, 74, 82	67, 68, 71	52, 71, 79	72, 75, 79, 82	84, 84, 76, 77	79, 66, 80, 77	84, 82, 80, 91	75, 71, 67	83, 86, 84, 83	85, 86, 80, 81	76, 82, 81
WhiteMaleMiddleAged.jpg	49, 48, 54, 51	41	69, 67, 70, 46	63, 76, 70, 68	68, 76, 70, 60	69, 69, 61, 70	53, 53, 61, 55	59, 78, 45, 50	56, 50, 54, 55	52, 61, 64, 55	49, 57	56, 50, 45, 47	74, 66, 70, 80	63, 68, 50, 79	45, 70, 68, 47	71, 58, 55, 69	62, 52, 47, 49, 58	53, 59, 65, 49	53, 49, 38, 50	72, 59, 70, 67	70, 68, 62, 71	70, 62, 67, 61	78, 61, 59, 74	69, 52, 57, 67	62, 68, 69, 60	47, 45, 54, 46	66, 61, 57, 70	81, 79, 71, 76	72, 69, 46, 62	44, 51, 50, 49	46, 53, 62, 57	48, 46, 54, 58	50, 59, 56, 58	51, 51, 51, 47	68, 79, 73, 63	66, 71, 63	55, 75, 63, 55	67, 75, 72, 50	65, 65, 65
WhiteMaleYoungAdult.jpg	25, 21, 26, 26	27, 34, 31, 27	27, 44, 44, 39	40, 39, 58, 62, 37	49, 26, 33, 21	29, 43, 44, 39	36, 38, 34, 31	39, 35, 20, 37	24, 27, 27, 26	29, 46, 26, 28	31, 23, 26, 27	20, 27, 20, 20	35, 35, 43, 48	39, 21, 32, 33	26, 33, 30, 25	28, 44, 28, 52, 28	40, 34, 26, 47	44, 47, 47, 40	25, 28, 30, 22	42, 44, 46, 43	47, 46, 64, 61	37, 42, 49, 50	49, 43, 20, 23	42, 44, 45, 47	40, 40, 40, 45	24, 20, 24, 24	43, 44, 30, 34	50, 45, 41, 43	49, 38, 49, 56	29, 30, 37, 23	38, 45, 22, 42	40, 28, 31, 20	22, 36, 36, 26	45, 41, 45, 35	48, 42, 52, 38	30, 47, 43, 46	50, 43, 27, 30	47, 37, 47, 29	26, 29, 34, 42
midjourney	bathing	bowing	buying	clapping	climbing	cooking	crawling	crying	dancing	digging	diving	dreaming	drinking	eating	fighting	giving	hugging	jumping	kissing	knitting	laughing	listening	painting	playing	reading	riding	sewing	singing	sitting	skiing	sleeping	smelling	snoring	standing	talking	thinking	waiting	washing	writing
AsianFemaleElderly.jpg	58.5	72.25	69.5	70.5	55	72.25	65.5	45	66.5	61.5	62.25	47.5	77.5	63.25	58.75	60	75.5	61.75	58.75	75.75	67.75	75.5	67	80.25	73.25	44.5	66	63	74.75	59.25	50.75	63.5	46.25	73.5	80.75	65	72.25	75.25	65.75
AsianFemaleMiddleAged.jpg	71	53.5	79.25	75.25	63.25	66	71.25	60.25	61.75	59.25	65.75	64	77.75	50.25	61.5		71.25	42.75	67.25	77.5	72.25	74.5	74.75	79.75	71.5	55.75	76.75	74.5	81.5	60.25	55.75	72.25	62.5	55.25	79.5	67	73.25	70.75	66.75
AsianFemaleYoungAdult.jpg	22.75	28	25.25	25.75	23.5	23	32.25	24.25	22	22.75		19.25	29.25	21.75	22.25	21.25	21.5	23.75	21.25	25.5	22.5	25.75	33.25	29.75	28.25	22.25	27.5	25.5	32	33.5	20.75	22.75	19	25.25	31.5	28	28.5	35	27.5
AsianMaleElderly.jpg	70.25		57.5	73.5	64		72	63	69.5			63	79	77.5	62.25		60	63.5	62.75	78.25	73.5	81.25	56.25	77	73.25	54.25	81.5	72.25	74.25	64.75	49.75	80	66	58.75	81.5	78.5	69.25	50
AsianMaleMiddleAged.jpg	70	72.75	55	68.5	71.5	78	70.75	62.5	70.25	64.25	61.5	63.75	79.25	69.25	68.75	79.75		50	70.75	76.75	76	73.5	73.75	76.75	78.5	57	78	68.75	81.25	55.5	63.25	53.5	62.25	64.25	79.25	75.25	73	69.25	79.75
AsianMaleYoungAdult.jpg	36.25	44.75	50.5	50	48.25	42	38.75	28.75	36.75	34	35	27	46.25	36.75	44.25			30.25	36	45.75	43	53.25	46	49.75	53.5	22.75	38.75	49.25	49.5	32.75	35.5	37.5	38.25	42.5	54.75	51.75	47.75	47.75	38.5
BlackFemaleElderly.jpg	67.25		61	73.75	56.75	70	72.25	47.75	65.25	62		69.5	75.75	69	61.75			63	70	73.5	67.75	76	62	77.5	80	48.25	72.75	56.25	75.25		65.25	64.25	55	57.5	76	70	71.5	62.75	71.5
BlackFemaleMiddleAged.jpg	51.75	59.5			54	67.25	52	49	56.75	56	57.5	65.25	65.25	58.5	48		54.5	46	58	67	50	70.75	65.75	62.75	64	35	65.5	61.75	66.75	52.5	46.25	49	63.75	59.5	71.25	67.5	68.5	41.75
BlackFemaleYoungAdult.jpg	49	50	41.25	50	41.75	54.5	45.75	38.75	44.5	39.25	42	47.25	57.75	53	41.25		50.25	37.25	46.5	58.25	41.5	50	51.25	54.75	48.75	32	45.25	36.75	61.25	41	49	39.25	46.25	57.25	55.5	44	47	52.5	39.75
BlackMaleElderly.jpg	65.25		57.5	79	72.25	77.75	76.25	45.5	70.5	60		44.25	73.5	60.5	66.75			57.5	62.25	84.25	76.25	71.75	78.75	78.5	84	43.5	83.5	72	78.5	60.5	64.75	58.5	60.75		81.75	70.25	77.5	68.5	73.75
BlackMaleMiddleAged.jpg	38.5			39	40.25	40.75	38.75	34.25	42.25	40.75	40.25	33.5	49	30	38.25			33.25	36	40	38.25	43	36.5	49	50	30.5	43.25	32.5	61.5	40.25	45	37.25	36.25	43.5	48	45	47.25	48	32.5
BlackMaleYoungAdult.jpg	25.5			32.5	27.75	35	30.25	27	25	29.75		23.25	55.25	35.75	46		51.5	24.5	26.5	42.5	44	60.5	45.25	40	49	21.5	40.5	43.25	56.25	30	39.75	31.75	34.25	30.75	65	36.25	36.5	38	33.75
WhiteFemaleElderly.jpg	62.75	68	61	64	54.75	70.75	69	54	61	60	52.75	54.25	69	66.25	60		57.5	39.5	61.75	76.5	74.5	69	68.75	66.75	71.5	42.25	78.25	63.25	57.5	50	67.75	49.75	59		70.5	70.25	67.25	71.75	71.25
WhiteFemaleMiddleAged.jpg	46	48.5		60.25	61	47.5	53.5	40.75	45.5	45.5	46.5	41.25	57.75	58.25	54.5	44.5	52.25	46.5	48.75	61.5	50.25	58.5	48	60.5	62	35.75	60	60.75	63.5	49.25	44.5	44.25	52.75	56	59.5	58.75	49	48.5	54
WhiteFemaleYoungAdult.jpg	29	30	36	59.75	37	43.5	43.25	30.5	28.25	29	24.25	19.25	50	50.25	30	27.5	30.75	25.75	28.25	52.25	49.5	53.5	41.75	52.25	44.25	25	42.25	43.5	44.5	45.75	31.75	34.25	35.75	40.25	58.5	36.25	38.75	40.75	41.5
WhiteMaleElderly.jpg	79.25				74.25	75.75	81.5	78.75	77.75	78.25		66.25	77.75	81.25	69	80	73.75		69.75	81.25	86.75	85.75	70.75			60.5	82.75	77.5	79.5			77	80.25	75.5	84.25		84	83
WhiteMaleMiddleAged.jpg	50.5		63	69.25	68.5	67.25	55.5	58	53.75	58		49.5	72.5	65	57.5	63.25		56.5	47.5	67	67.75	65	68	61.25	64.75	48	63.5	76.75	62.25	48.5	54.5	51.5	55.75	50	70.75		62	66
WhiteMaleYoungAdult.jpg	24.5	29.75	38.5		32.25	38.75	34.75	32.75	26	32.25	26.75	21.75	40.25	31.25	28.5		36.75	44.5	26.25	43.75	54.5	44.5	33.75	44.5	41.25	23	37.75	44.75	48	29.75	36.75	29.75	30	41.5	45	41.5	37.5	40	32.75
pix2pix	bathing	bowing	buying	clapping	climbing	cooking	crawling	crying	dancing	digging	diving	dreaming	drinking	eating	fighting	giving	hugging	jumping	kissing	knitting	laughing	listening	painting	playing	reading	riding	sewing	singing	sitting	skiing	sleeping	smelling	snoring	standing	talking	thinking	waiting	washing	writing
AsianFemaleElderly.jpg	58	17	64		39	28	63	64			52	20	64	49	65	67			63	73	30	65	65	69	67	25	46	56	57	37		64	28	64	64	63	64	64	42
AsianFemaleMiddleAged.jpg	35		23		27		39	27			25	53	46	27	23	26	29		30	62	27	57	55	29			75	25	29			57	46	45	49	26	22	30	30
AsianFemaleYoungAdult.jpg	29		26	55			37	40				20	24	35	22	29	38, 22		24		30	40	25	30	24		26	25	25			22	21	35	29	22	27	27
AsianMaleElderly.jpg	59	25		41		43	71	66	64		55	74	62	56	24	66	32		28		32	73	65	60	74			66	27			51	63	54	63	48	68	48	37
AsianMaleMiddleAged.jpg	54		64			45	46	61				26	25	50	28	72	80		28	34	57	74	60	64	72		50	30	63			36	29		57	59	63	58	23
AsianMaleYoungAdult.jpg	24		24	35		31		23			28	23	26	20	23	27	25		21	77	21	23	24	23	67		30	17	26			26		28	27	23	27
BlackFemaleElderly.jpg	58		61			62	64					19	63	66	62	64	33		34		62	33	67					62	62			27		70	62	77		61
BlackFemaleMiddleAged.jpg	25	61	29		26	37	36	30		53	24	24	22	24	26	33	63		28	74	26	41	33	26	28		58	25	55		19	52	61	25	25	20	27	23	44
BlackFemaleYoungAdult.jpg	31	34	30	65		23	62	47		73	37	32	25	31	22	32	29		24	34	21	46	28	41	25			27	34	34	22	26	41	36	29	31	36		30
BlackMaleElderly.jpg	29	23	63	61		55		73			33	27	32		54	63	62		69	33	63	37	61	63	35		43	42	28			35	59	53	64	58	46	60	55
BlackmaleMiddleAged.jpg	24		26	44	34		30	36				24	23	29	20	30	27		24		29	58	30	35	22		55	21	27	35		29		36	25	25	30	34	14
BlackMaleYoungAdult.jpg	25				26		31	28				21	24	27		28	25		18		33	21	33	27			30	27	28			31		28	28	27	29	31
WhiteFemaleElderly.jpg	61	34	62		56	64	58	74		69		20		54	55	62	24, 25		26		56	67	63	64	76	60	66	40	62	35		51	38	56	62	63	67	43	36
WhiteFemaleMiddleAged.jpg	34	23	34	53	37		43	45			43	18	39	30	29	33	32		25	37	29	28	41	31	40		67	29	40			37	15	30	29	30	40	37
WhiteFemaleYoungAdult.jpg	22	36	24	48	33	35	35	29		52	38	19	25	28	24	21	25		23	20	22	22	22	23	21			24	24		24	28	28	24	22	20	23	23	28
WhiteMaleElderly.jpg	77		37			49		30				60	73		78	87	29				77	79	76			47	45	41	26					76	65	74	76	79
WhiteMaleMiddleAged.jpg	24		24	40	48	23	54	68				41	33	50	35	35	23		23	66	46	55	55	55	50		44	21	50			45	45	43	54	53	44	54	38
WhiteMaleYoungAdult.jpg	45	22	39	63		51		33	43			18	26	44	28	36	27		21	34	24	32	35	25	20		64	26	20			51	38	30	29	19	24	43	24
original	age
	58	58	58	58	58	58	58	58	58	58	58	58	58	58	58	58	58	58	58	58	58	58	58	58	58	58	58	58	58	58	58	58	58	58	58	58	58	58	58
	62	62	62	62	62	62	62	62	62	62	62	62	62	62	62	62	62	62	62	62	62	62	62	62	62	62	62	62	62	62	62	62	62	62	62	62	62	62	62
	36	36	36	36	36	36	36	36	36	36	36	36	36	36	36	36	36	36	36	36	36	36	36	36	36	36	36	36	36	36	36	36	36	36	36	36	36	36	36
	64	64	64	64	64	64	64	64	64	64	64	64	64	64	64	64	64	64	64	64	64	64	64	64	64	64	64	64	64	64	64	64	64	64	64	64	64	64	64
	59	59	59	59	59	59	59	59	59	59	59	59	59	59	59	59	59	59	59	59	59	59	59	59	59	59	59	59	59	59	59	59	59	59	59	59	59	59	59
	22	22	22	22	22	22	22	22	22	22	22	22	22	22	22	22	22	22	22	22	22	22	22	22	22	22	22	22	22	22	22	22	22	22	22	22	22	22	22
	64	64	64	64	64	64	64	64	64	64	64	64	64	64	64	64	64	64	64	64	64	64	64	64	64	64	64	64	64	64	64	64	64	64	64	64	64	64	64
	40	40	40	40	40	40	40	40	40	40	40	40	40	40	40	40	40	40	40	40	40	40	40	40	40	40	40	40	40	40	40	40	40	40	40	40	40	40	40
	31	31	31	31	31	31	31	31	31	31	31	31	31	31	31	31	31	31	31	31	31	31	31	31	31	31	31	31	31	31	31	31	31	31	31	31	31	31	31
	77	77	77	77	77	77	77	77	77	77	77	77	77	77	77	77	77	77	77	77	77	77	77	77	77	77	77	77	77	77	77	77	77	77	77	77	77	77	77
	38	38	38	38	38	38	38	38	38	38	38	38	38	38	38	38	38	38	38	38	38	38	38	38	38	38	38	38	38	38	38	38	38	38	38	38	38	38	38
	26	26	26	26	26	26	26	26	26	26	26	26	26	26	26	26	26	26	26	26	26	26	26	26	26	26	26	26	26	26	26	26	26	26	26	26	26	26	26
	61	61	61	61	61	61	61	61	61	61	61	61	61	61	61	61	61	61	61	61	61	61	61	61	61	61	61	61	61	61	61	61	61	61	61	61	61	61	61
	38	38	38	38	38	38	38	38	38	38	38	38	38	38	38	38	38	38	38	38	38	38	38	38	38	38	38	38	38	38	38	38	38	38	38	38	38	38	38
	29	29	29	29	29	29	29	29	29	29	29	29	29	29	29	29	29	29	29	29	29	29	29	29	29	29	29	29	29	29	29	29	29	29	29	29	29	29	29
	78	78	78	78	78	78	78	78	78	78	78	78	78	78	78	78	78	78	78	78	78	78	78	78	78	78	78	78	78	78	78	78	78	78	78	78	78	78	78
	53	53	53	53	53	53	53	53	53	53	53	53	53	53	53	53	53	53	53	53	53	53	53	53	53	53	53	53	53	53	53	53	53	53	53	53	53	53	53
	28	28	28	28	28	28	28	28	28	28	28	28	28	28	28	28	28	28	28	28	28	28	28	28	28	28	28	28	28	28	28	28	28	28	28	28	28	28	28
sd1.5 older
AsianFemaleElderly.jpg	0	0	0	0	0	0	0	0	0	0	0	0	0	0	0	0	0	0	0	0	0	0	0	0	0	0	0	0	0	0	0	0	0	0	0	0	0	0	0
AsianFemaleMiddleAged.jpg	0	0	0	0	0	0	0	0	0	0	0	0	0	0	0	0	0	0	0	0	0	0	0	0	0	0	0	0	0	0	0	0	0	0	0	0	0	0	0
AsianFemaleYoungAdult.jpg	0	0	0	0	0	0	0	0	0	0	0	0	0	0	0	0	0	0	0	0	0	0	0	0	0	0	1	0	0	0	0	0	0	0	0	0	0	0	1
AsianMaleElderly.jpg	0	0	0	0	0	0	0	0	0	0	0	0	0	0	0	0	0	0	0	0	0	0	0	0	0	0	0	0	0	0	0	0	0	0	0	0	0	0	0
AsianMaleMiddleAged.jpg	0	0	0	0	0	0	0	0	0	0	0	0	0	0	0	0	0	0	0	0	0	0	0	0	0	0	0	0	0	0	0	0	0	0	0	0	0	0	0
AsianMaleYoungAdult.jpg	0		1	1	0	0	0	1	0	1	0	0	0	0	0	0	0	0	0	1	0	1	0	0	1	0	1	0	0	1	0	0	0	0	0	1	1	0	0
BlackFemaleElderly.jpg	0		0	0	0	0	0	0	0	0	0	0	0	0	0	0	0	0	0	0	0	0	0	0	0	0	0	0	0	0	0	0	0	0	0	0	0	0
BlackFemaleMiddleAged.jpg	0	0	0	0	0	0	0	0	0	0	0	0	0	0	0	0	0	0	0	0	0	1	0	0	1	0	1	0	1	0	0	0	0	0	0	0	0	0	0
BlackFemaleYoungAdult.jpg	0	0	0	0	0	0	0	1	0	0	0	0	0	0	0	0	0	0	0	0	0	0	0	0	0	0	0	0	0	0	0	0	0	0	0	0	0	0	0
BlackMaleElderly.jpg	0		0	0	0	0	0	0	0	0	0	0	0	0	0	0	0	0	0	0	0	0	0	0	0	0	0	0	0	0	0	0	0	0	0	0	0	0	0
BlackmaleMiddleAged.jpg	0	0	0	0	0	0	0	0	0	0	0	0	0	0	0	0	0	0	0	0	0	0	0	0	0	0	0	0	0	0	0	0	0	0	0	0	0	0	0
BlackMaleYoungAdult.jpg	0	0	0	0	0	0	0	0	0	0	0	0	0	0	0	0	0	0	0	0	0	0	0	0	0	0	1	0	0	1	0	0	0	0	0	0	0	0	0
WhiteFemaleElderly.jpg	0		0	0	0	0	0	0	0	0	0	0	0	0	0	0	0	0	0	0	0	0	0	0	0	0	0	0	0	0	0	0	0	0	0	0	0	0	0
WhiteFemaleMiddleAged.jpg	0	0	0	0	0	0	0	0	0	0	0	0	0	0	0	0	0	0	0	1	0	0	0	0	0	0	0	0	0	0	0	0	0	0	0	0	0	0	0
WhiteFemaleYoungAdult.jpg	0	0	0	0	0	0	0	1	0	1	0	0	0	0	0	1	0	0	0	0	0	0	0	0	0	0	0	0	0	0	0	0	0	0	0	0	0	1	0
WhiteMaleElderly.jpg	0	0	0	0	0	0	0	0	0	0	0	0		0	0		0	0	0	0	0	0	0	0	0	0	0	0	0	0	0	0	0	0	0	0	0	0	0
WhiteMaleMiddleAged.jpg	0	0	0	0	0	0	0	0	0	0	0	0	0	0	0	0	0	0	0	0	0	0	0	0	0	0	1	0	0	0	0	0	0	0	0	0	0	0	0
WhiteMaleYoungAdult.jpg	0	0	0	0	0	0	0	0	0	0	0	0	0	0	0	0	0	0	0	1	0	0	0	0	0	0	0	0	0	0	0	0	0	0	0	0	0	0	0
1.5 BiggerSum	0	0	1	1	0	0	0	3	0	2	0	0	0	0	0	1	0	0	0	3	0	2	0	0	2	0	5	0	1	2	0	0	0	0	0	1	1	1	1
sd2.1 older
AsianFemaleElderly.jpg	0	0	0	0	0	0	0	0	0	0	0	0	0	0	0	0	0	0	0	0	0	1	0	0	0	0	0	0	0	0	0	0	0	0	0	0	0	0	0
AsianFemaleMiddleAged.jpg	0		0	0	0	0	0	0	0		0	0	0	0	0	0			0		0	0	0	0		0		0	0	0	0	0	0	0	0	0		0	0
AsianFemaleYoungAdult.jpg	0	1	0	0		0	0	0	0	0	0	0			0		0	0	0	0	1	1	0	0	0	0	1	0	0	0	0	1	1	1	0			0	0
AsianMaleElderly.jpg		0	0	0	0		0	0	0	0	0	0	0	0	0	0		0	0	0	0	0	0	0	0	0		0	0	0	0			0	0	0		0	0
AsianMaleMiddleAged.jpg	0	0	0	0	0	0	0	0	1	0	0		1		0	0	0	0	0		0	0	0	0	0	1	0	0	1	0	0	1	0	0	0	0	0	0	0
AsianMaleYoungAdult.jpg	0	0	0	1	0	0	0		0	1	0			0	0	0			0	0	1	0	0	0		1	0	1	0		0	0	1		0	0	1	1	0
BlackFemaleElderly.jpg	0		0	1		0			0		0	0			0				0	0	0	0	0		0	0			0	0	0	0		0	0			0	0
BlackFemaleMiddleAged.jpg	0	1	0	0	0	0	0	0	0	0	0	0	0	0	0		0	0	0	0	0	1	0	0	1	0	0	0	0	0	0	0	0	0	1	0	0	0	0
BlackFemaleYoungAdult.jpg	1	0	0	0	0	1	0	0	0	0	0	0	0		1	0		0	0		0	1	0	0	0	1	0	0	0	1	1	0	1	1	1	0	0	0	1
BlackMaleElderly.jpg	0	0	0		0	0	0	0	0	0	0	0	0	0	0	0	0	0	0	0	0	0	0	0	0		0	0	0		0	0	0	0	0	0	0	0	0
BlackmaleMiddleAged.jpg	0	1	0	0	0	0	0	0	0	0	0	0	0	0	0	0	0	0	0	0	0	0	0	0	0	0	0	0	0		0	0	1	0	0	0	0	0	0
BlackMaleYoungAdult.jpg	0	1	0	0		0	0	0	0	0	0	0	0	0	0		0		0	0	1	0	0	0	0	1			0	0	0	0	0		1	0	0	0	0
WhiteFemaleElderly.jpg	0		0	0		0	0	0	0	0	0		0		0	0			0		0	0	0		0	0	0		0		0	0	0	0	0	0	0	0	0
WhiteFemaleMiddleAged.jpg		0		0	0	1	0	0	1	0	0	0	0	0	1	0	0	0	0	1	1	1	0	1	1	1	0	1	1	0	0	1	1	1	0	0		1	0
WhiteFemaleYoungAdult.jpg	0	1	0	0	1	1	0	0	1	0	0	0	1	1	1	0	0	1	0	0	1	1	0	0	0	1	0	0	1	0	1	0	1	1	1	0	1	0	1
WhiteMaleElderly.jpg		0	0		0	0	0		0	0		0	0	0	0			0		0	0	0	0		0	0		0	0	0			0	0	0			0	0
WhiteMaleMiddleAged.jpg	0	1	0	0	0	0	0		0	0	0	0	0	0	0	0	0	0	0		0	0	0	0	0	0		0	0	0	0	0		0	0	0	1	0	0
WhiteMaleYoungAdult.jpg		1	0	0	0	1	0	0		1	0		0	0	0	0	0	0	0	0	1	0	0	1	0	1	1	0	0	1	0	0		1	1	0	0	1	0
2.1BIGGERSUM	1	7	0	2	1	4	0	0	3	2	0	0	2	1	3	0	0	1	0	1	6	6	0	2	2	7	2	2	3	2	2	3	6	5	5	0	3	3	2
SDXL older
v1_img2img_AsianFemaleElderly.jpg.png	0	0	0	0		0	0	0	0	1	0	1	0	0	0	0	0		0	0	0	0	0	0	0			0	0	0	0	0	0		0	0	1	0	0
v1_img2img_AsianFemaleMiddleAged.jpg.png	0	0	0	0		0	0	0	1	1	0	0	1	0	0	1	0	0	0	0	0	0	0	0	0	0	0	0	0	0	0	0	0	0	0	0	0	0	1
v1_img2img_AsianFemaleYoungAdult.jpg.png	0	0	0	0	0	0	0	0	0		0	0	0	0	0	0	0	0	0	0	1	0	0	0	0	0	0	0	0	0	0	0	0	0	0	0	0	0	0
v1_img2img_AsianMaleElderly.jpg.png	0	0	0	0		0		1	0	0	0	0	0	0	1	0			0	0	0	0	0	0	0	0	0	0	0	0	0	0		0	0		0	0	0
v1_img2img_AsianMaleMiddleAged.jpg.png		1	0	1	0	0	0	0	0	0	0	0	0	0	0	1			0	0	0	0	0	0	0	0	0	0	1	0	1	0	0	0	1	0	0	0	0
v1_img2img_AsianMaleYoungAdult.jpg.png			1	0		1	0	1	0	1	1	0	0	1	1	1	0	1	0	1	1	1	1	0	0	1	0	1	1	1	1	1	0	1	1	1	0
v1_img2img_BlackFemaleElderly.jpg.png	0		0	0			0	0	0		0	0	0	0		0	0	0	0	0	0	0	0	0	0		0	0	0	0	1	0	0	0	0	0	0	0	0
v1_img2img_BlackFemaleMiddleAged.jpg.png	0		0	1	0	1		0			0	1	1	0	0		1	0		0	0	0	1	1	0	1	1	0	1	0	1	0	0	0	0	0	0	1	1
v1_img2img_BlackFemaleYoungAdult.jpg.png	0	0	0	0	0	0	0	1	0	0	0	0	0	0	0	0	0	0		0	0	0	0	0	0	0	0	0	0	0	0	0	0	0	0	0	0	0	0
v1_img2img_BlackMaleElderly.jpg.png	0	0	0	0	0	0	0	0	0	0	0	0	0	0	0	0	0		0	0	0	0	0	0	0	0	0	0	0	0	0	0	0	0	0	0	0	0	0
v1_img2img_BlackmaleMiddleAged.jpg.png	1	1	0	0	0	1	0	1	1	0	0	1	0	1	1	1	0	0	0	1	0	1	1	0	0	0	0	0	1	0	0	0	0	1	1	1	1	1	0
v1_img2img_BlackMaleYoungAdult.jpg.png	0	0	1	1			0	1	0	0	0	0	0	0	0	0	1		0	0	0	0	0	0	0		0	0	0	0	1	0	1	0	1	0	1		0
v1_img2img_WhiteFemaleElderly.jpg.png			0	0		0	1	0		1	0	0	0	0	1	1	0			1	1	0	0	0	0		0	0	0	0	0	0	0		0	0		0	0
v1_img2img_WhiteFemaleMiddleAged.jpg.png	0	0	0	0	0	0	0	1	0	1	0	0	0	0	0	0	0	0	0	0	0	0	0	0	0	0	0	0	0	0	0	0	0	0	0	0	0	0	0
v1_img2img_WhiteFemaleYoungAdult.jpg.png	0	1	0	0	0	1	0	0	0	0	0	0	0	0	1	0	0	0		0	0	0	0	0	0	0	0	0	0	0	0	0	0	0	1	0	1	0	0
v1_img2img_WhiteMaleElderly.jpg.png		0	0			0	0	0	0	0	0	0	0	0						0	0	0	0		0	0	0	0	0	0	0	0	0	0	0	0	0		0
v1_img2img_WhiteMaleMiddleAged.jpg.png	0	1	0	0	0	0	0	1	0	1	0	0		0	1	0	0	0	0	0	0	0	0	0	0	0	0	0	0	0	0	0	0	0	1	0	1	1	0
v1_img2img_WhiteMaleYoungAdult.jpg.png	1	1	0	1	0	1	0	1	0	1	1	1	1	0	1	0	1	1	0	1	1	0	1	1	1	0	1	0	0	0	1	0	0	1	1	1	1	0	1
SDXL bigger	2	5	2	4	0	5	1	8	2	7	2	4	3	2	7	5	3	2	0	4	4	2	4	2	1	2	2	1	4	1	6	1	1	3	7	3	6	3	3
Midjourney older
AsianFemaleElderly.png	0	0	0	0	0	0	0	0	0	0	0	0	0	0	0	0	0	0	0	0	0	0	0	1	0	0	0	0	0	0	0	0	0	0	1	0	0	0	0
AsianFemaleMiddleAged.png	0	0	0	0	0	0	0	0	0	0	0	0	0	0	0		0	0	0	0	0	0	0	0	0	0	0	0	0	0	0	0	0	0	0	0	0	0	0
AsianFemaleYoungAdult.png	0	0	0	0	0	0	0	0	0	0		0	0	0	0	0	0	0	0	0	0	0	0	0	0	0	0	0	0	0	0	0	0	0	0	0	0	0	0
AsianMaleElderly.png	0		0	0	0		0	0	0			0	0	0	0		0	0	0	0	0	0	0	0	0	0	0	0	0	0	0	0	0	0	0	0	0	0
AsianMaleMiddleAged.png	0	0	0	0	0	0	0	0	0	0	0	0	1	0	0	1		0	0	0	0	0	0	0	0	0	0	0	1	0	0	0	0	0	1	0	0	0	1
AsianMaleYoungAdult.png	0	1	1	1	1	0	0	0	0	0	0	0	1	0	1			0	0	1	1	1	1	1	1	0	0	1	1	0	0	0	0	1	1	1	1	1	0
BlackFemaleElderly.png	0		0	0	0	0	0	0	0	0		0	0	0	0			0	0	0	0	0	0	0	0	0	0	0	0		0	0	0	0	0	0	0	0	0
BlackFemaleMiddleAged.png	0	0			0	1	0	0	0	0	0	1	1	0	0		0	0	0	1	0	1	1	1	1	0	1	1	1	0	0	0	1	0	1	1	1	0
BlackFemaleYoungAdult.png	0	0	0	0	0	1	0	0	0	0	0	0	1	1	0		0	0	0	1	0	0	1	1	0	0	0	0	1	0	0	0	0	1	1	0	0	1	0
BlackMaleElderly.png	0		0	0	0	0	0	0	0	0		0	0	0	0			0	0	0	0	0	0	0	0	0	0	0	0	0	0	0	0		0	0	0	0	0
BlackMaleMiddleAged.png	0			0	0	0	0	0	0	0	0	0	0	0	0			0	0	0	0	0	0	0	0	0	0	0	1	0	0	0	0	0	0	0	0	0	0
BlackMaleYoungAdult.png	0			0	0	0	0	0	0	0		0	1	0	0		1	0	0	0	0	1	0	0	1	0	0	0	1	0	0	0	0	0	1	0	0	0	0
WhiteFemaleElderly.png	0	0	0	0	0	0	0	0	0	0	0	0	0	0	0		0	0	0	0	0	0	0	0	0	0	0	0	0	0	0	0	0		0	0	0	0	0
WhiteFemaleMiddleAged.png	0	0		1	1	0	0	0	0	0	0	0	0	1	0	0	0	0	0	1	0	1	0	1	1	0	1	1	1	0	0	0	0	0	1	1	0	0	0
WhiteFemaleYoungAdult.png	0	0	0	1	0	0	0	0	0	0	0	0	1	1	0	0	0	0	0	1	1	1	0	1	0	0	0	0	0	0	0	0	0	0	1	0	0	0	0
WhiteMaleElderly.png	0				0	0	0	0	0	0		0	0	0	0	0	0		0	0	0	0	0			0	0	0	0			0	0	0	0		0	0
WhiteMaleMiddleAged.png	0		0	0	0	0	0	0	0	0		0	0	0	0	0		0	0	0	0	0	0	0	0	0	0	1	0	0	0	0	0	0	0		0	0
WhiteMaleYoungAdult.png	0	0	0		0	0	0	0	0	0	0	0	0	0	0		0	0	0	0	1	0	0	0	0	0	0	0	0	0	0	0	0	0	0	0	0	0	0
	0	1	1	3	2	2	0	0	0	0	0	1	6	3	1	1	1	0	0	5	3	5	3	6	4	0	2	4	7	0	0	0	1	2	8	3	2	2	1
pix2pix older
AsianFemaleElderly.png	0	0	0		0	0	0	0			0	0	0	0	0	0			0	0	0	0	0	0	0	0	0	0	0	0		0	0	0	0	0	0	0	0
AsianFemaleMiddleAged.png	0		0		0		0	0			0	0	0	0	0	0	0		0	0	0	0	0	0			0	0	0			0	0	0	0	0	0	0	0
AsianFemaleYoungAdult.png	0		0	0			0	0				0	0	0	0	0	0		0		0	0	0	0	0		0	0	0			0	0	0	0	0	0	0
AsianMaleElderly.png	0	0		0		0	0	0	0		0	0	0	0	0	0	0		0		0	0	0	0	0			0	0			0	0	0	0	0	0	0	0
AsianMaleMiddleAged.png	0		0			0	0	0				0	0	0	0	0	1		0	0	0	0	0	0	0		0	0	0			0	0		0	0	0	0	0
AsianMaleYoungAdult.png	0		0	0		0		0			0	0	0	0	0	0	0		0	1	0	0	0	0	1		0	0	0			0		0	0	0	0
BlackFemaleElderly.png	0		0			0	0					0	0	0	0	0	0		0		0	0	0					0	0			0		0	0	0		0
BlackFemaleMiddleAged.png	0	1	0		0	0	0	0		0	0	0	0	0	0	0	1		0	1	0	0	0	0	0		0	0	0		0	0	1	0	0	0	0	0	0
BlackFemaleYoungAdult.png	0	0	0	1		0	1	0		1	0	0	0	0	0	0	0		0	0	0	0	0	0	0			0	0	0	0	0	0	0	0	0	0		0
BlackMaleElderly.png	0	0	0	0		0		0			0	0	0		0	0	0		0	0	0	0	0	0	0		0	0	0			0	0	0	0	0	0	0	0
BlackMaleMiddleAged.png	0		0	0	0		0	0				0	0	0	0	0	0		0		0	0	0	0	0		0	0	0	0		0		0	0	0	0	0	0
BlackMaleYoungAdult.png	0				0		0	0				0	0	0		0	0		0		0	0	0	0			0	0	0			0		0	0	0	0	0
WhiteFemaleElderly.png	0	0	0		0	0	0	0		0		0		0	0	0	0		0		0	0	0	0	0	0	0	0	0	0		0	0	0	0	0	0	0	0
WhiteFemaleMiddleAged.png	0	0	0	0	0		0	0			0	0	0	0	0	0	0		0	0	0	0	0	0	0		1	0	0			0	0	0	0	0	0	0
WhiteFemaleYoungAdult.png	0	0	0	0	0	0	0	0		1	0	0	0	0	0	0	0		0	0	0	0	0	0	0			0	0		0	0	0	0	0	0	0	0	0
WhiteMaleElderly.png	0		0			0		0				0	0		0	0	0				0	0	0			0	0	0	0					0	0	0	0	0
WhiteMaleMiddleAged.png	0		0	0	0	0	0	0				0	0	0	0	0	0		0	0	0	0	0	0	0		0	0	0			0	0	0	0	0	0	0	0
WhiteMaleYoungAdult.png	0	0	0	1		1		0	0			0	0	0	0	0	0		0	0	0	0	0	0	0		1	0	0			1	0	0	0	0	0	0	0
	0	1	0	2	0	1	1	0	0	2	0	0	0	0	0	0	2	0	0	2	0	0	0	0	1	0	2	0	0	0	0	1	1	0	0	0	0	0	0
sd1.5 smaller
AsianFemaleElderly.jpg	1	1	0	1	0	0	0	0	0	0	1	1	0	1	1	1	0	0	1	0	1	1	1	1	1	1	0	1	0	1	0	1	1	0	0	1	0	1	0
AsianFemaleMiddleAged.jpg	1	1	1	1	1	1	1	1	1	1	0	1	1	1	1	1	1	0	0	0	1	0	1	1	1	0	0	1	1	1	1	1	1	1	1	1	1	1	1
AsianFemaleYoungAdult.jpg	0	0	0	0	1	0	0	0	0	0	0	0	0	0	0	0	0	0	0	0	0	0	0	1	0	0	0	0	0	0	0	0	0	0	0	0	0	0	0
AsianMaleElderly.jpg	1	1	1	1	1	1	1	1	1	1	1	1	1	1	1	1	1	1	1	1	1	0	1	1	1	0	0	1	1	1	1	1	1	1	1	1	0	1	0
AsianMaleMiddleAged.jpg	1	1	0	0	1	1	1	0	1	0	1	1	1	1	1	1	0	1	1	0	1	0	0	1	0	1	0	1	1	1	1	1	0	1	1	1	0	1	0
AsianMaleYoungAdult.jpg	0		0	0	0	0	0	0	0	0	0	0	0	0	0	0	0	0	0	0	0	0	0	0	0	0	0	0	0	0	0	0	0	0	0	0	0	0	0
BlackFemaleElderly.jpg	1		1	1	1	1	1	0	1	1	1	1	1	1	1	0	0	1	1	0	1	0	0	1	1	1	0	1	0	0	1	1	1	1	1	1	0	1
BlackFemaleMiddleAged.jpg	0	0	0	0	0	0	0	0	0	0	0	0	0	0	0	0	0	0	0	0	0	0	0	0	0	0	0	0	0	0	0	0	0	0	0	0	0	0	0
BlackFemaleYoungAdult.jpg	0	0	0	0	0	0	0	0	0	0	0	0	0	0	0	0	0	0	0	0	0	0	0	0	0	0	0	0	0	0	0	0	0	0	0	0	0	0	0
BlackMaleElderly.jpg	1		1	1	1	1	1	1	1	1	1	1	1	1	1	1	1	1	1	0	1	1	1	1	1	1	1	1	1	1	1	1	1	1	1	1	0	1	1
BlackmaleMiddleAged.jpg	0	0	0	0	0	0	0	0	0	0	0	0	0	0	0	0	0	0	0	0	0	0	0	0	0	0	0	0	0	0	0	0	0	0	0	0	0	0	0
BlackMaleYoungAdult.jpg	0	0	0	0	0	0	0	0	0	0	0	0	0	0	0	0	0	0	0	0	0	0	0	0	0	0	0	0	0	0	0	0	0	0	0	0	0	0	0
WhiteFemaleElderly.jpg	1		1	1	1	1	1	1	1	1	1	1	0	1	1	0	0	1	0	1	1	0	0	1	1	1	0	0	1	1	1	1	0	1	0	0	0	1	0
WhiteFemaleMiddleAged.jpg	0	0	0	0	0	0	0	0	0	0	0	0	0	0	1	0	0	0	0	0	0	0	0	0	0	0	0	0	0	0	0	0	0	0	0	0	0	0	0
WhiteFemaleYoungAdult.jpg	0	0	0	0	0	0	0	0	0	0	0	0	0	0	0	0	0	0	0	0	0	0	0	0	0	0	0	0	0	0	0	0	0	0	0	0	0	0	0
WhiteMaleElderly.jpg	1	1	1	0	1	1	1	1	1	1	0	0		1	0		0	1	1	1	1	0	1	0	0	0	0	1	0	0	1	1	0	0	0	1	0	1	1
WhiteMaleMiddleAged.jpg	1	1	1	1	1	1	1	0	1	1	1	1	1	1	1	1	1	1	1	0	1	1	1	1	0	1	0	1	1	1	1	1	0	1	1	1	0	1	1
WhiteMaleYoungAdult.jpg	0	0	0	0	0	0	0	0	0	0	0	0	0	0	0	0	0	0	0	0	0	0	0	0	0	0	0	0	0	0	0	0	0	0	0	0	0	0	0
1.5 smaller	9	6	7	7	9	8	8	5	8	7	7	8	6	9	9	6	4	7	7	3	9	3	6	9	6	6	1	8	6	7	8	9	5	7	6	8	1	9	4
sd2.1
AsianFemaleElderly.jpg	1	0	1	1	0	0	1	1	1	1	1	0	1	1	1	1	1	1	0	1	0	0	1	1	0	0	1	0	1	1	0	1	0	1	0	0	0	0	0
AsianFemaleMiddleAged.jpg	1		1	1	1	1	1	0	0		0	1	1	1	1	1			1		0	0	0	1		0		1	0	0	1	1	1	1	0	1		1	1
AsianFemaleYoungAdult.jpg	0	0	1	0		0	1	0	0	0	0	0			0		0	0	0	0	0	0	0	0	0	0	0	0	0	0	0	0	0	0	0			0	0
AsianMaleElderly.jpg		0	0	0	0		1	1	1	1	1	0	1	0	1	1		1	1	0	0	0	0	1	1	0		1	0	0	1			0	0	1		1	1
AsianMaleMiddleAged.jpg	0	1	1	1	0	1	1	0	0	0	1		0		0	1	0	1	1		0	0	0	0	1	0	0	0	0	0	1	0	0	1	0	0	0	1	0
AsianMaleYoungAdult.jpg	0	0	0	0	0	0	0		0	0	0			0	0	0			0	0	0	0	0	0		0	0	0	0		0	0	0		0	0	0	0	0
BlackFemaleElderly.jpg	1		1	0		0			0		1	1			1				1	1	1	0	0		1	0			1	1	1	1		0	0			1	0
BlackFemaleMiddleAged.jpg	1	0	1	1	0	0	0	0	0	0	0	1	0	0	0		0	1	0	0	1	0	0	0	0	0	0	0	0	1	0	0	0	1	0	0	0	0	0
BlackFemaleYoungAdult.jpg	0	0	0	1	0	0	0	0	0	0	0	0	0		0	0		0	0		1	0	0	0	0	0	0	0	0	0	0	0	0	0	0	0	0	0	0
BlackMaleElderly.jpg	1	1	1		1	1	1	1	1	1	1	1	1	1	1	1	1	1	1	1	1	1	1	1	1		1	1	1		1	1	0	0	1	1	1	0	1
BlackmaleMiddleAged.jpg	0	0	0	0	0	0	0	0	0	0	0	0	0	0	0	0	0	0	0	0	0	0	0	0	0	0	0	0	0		0	0	0	0	0	0	0	0	0
BlackMaleYoungAdult.jpg	0	0	0	0		0	0	0	0	0	0	0	0	0	0		0		0	0	0	0	0	0	0	0			0	0	0	0	0		0	0	0	0	0
WhiteFemaleElderly.jpg	1		1	0		0	1	1	0	1	1		1		0	1			0		1	1	1		0	1	1		0		1	1	0	1	0	1	1	1	1
WhiteFemaleMiddleAged.jpg		0		0	0	0	1	0	0	0	0	0	0	0	0	1	0	0	0	0	0	0	0	0	0	0	0	0	0	1	0	0	0	0	0	0		0	0
WhiteFemaleYoungAdult.jpg	0	0	0	0	0	0	0	0	0	0	0	0	0	0	0	1	1	0	0	0	0	0	0	0	0	0	0	0	0	0	0	0	0	0	0	0	0	0	0
WhiteMaleElderly.jpg		0	0		0	1	1		0	0		1	1	1	1			0		1	0	0	1		0	0		0	0	1			1	0	0			0	0
WhiteMaleMiddleAged.jpg	1	0	1	1	0	0	1		1	0	0	1	0	1	0	1	0	1	1		1	0	1	1	0	0		0	0	1	1	1		1	0	0	0	1	0
WhiteMaleYoungAdult.jpg		0	0	1	0	0	0	0		0	0		1	0	0	0	0	0	0	0	0	0	0	0	0	0	0	0	0	0	0	0		0	0	0	0	0	0
2.1smaller	7	2	9	7	2	4	10	4	4	4	6	6	7	5	6	9	3	6	6	4	6	2	5	5	4	1	3	3	3	6	7	6	2	6	1	4	2	6	4
SDXL
v1_img2img_AsianFemaleElderly.jpg.png	1	0	0	1		0	0	0	0	0	0	0	0	1	0	1	1		1	0	1	1	0	1	1			1	1	1	0	1	1		0	0	0	1	0
v1_img2img_AsianFemaleMiddleAged.jpg.png	0	0	0	0		0	0	0	0	0	0	0	0	0	0	0	0	0	1	0	0	0	0	0	0	0	0	1	0	0	0	0	0	0	0	0	0	0	0
v1_img2img_AsianFemaleYoungAdult.jpg.png	0	1	0	1	0	1	1	1	0		0	0	0	0	0	1	0	0	0	0	0	0	1	1	0	0	0	0	0	0	0	0	0	0	0	0	0	0	1
v1_img2img_AsianMaleElderly.jpg.png	1	0	0	1		0		0	1	0	0	0	1	0	0	0			1	0	0	0	1	0	0	0	0	1	1	1	1	1		0	0		0	0	0
v1_img2img_AsianMaleMiddleAged.jpg.png		0	0	0	0	0	1	0	0	0	1	0	0	0	0	0			1	0	1	0	0	1	0	0	0	0	0	0	0	0	0	0	0	0	0	1	0
v1_img2img_AsianMaleYoungAdult.jpg.png			0	0		0	0	0	0	0	0	0	0	0	0	0	0	0	0	0	0	0	0	0	0	0	0	0	0	0	0	0	0	0	0	0	0
v1_img2img_BlackFemaleElderly.jpg.png	1		0	1			1	0	1		0	0	0	1		0	0	1	1	0	1	0	0	1	0		1	0	0	1	0	0	1	0	1	1	0	1	0
v1_img2img_BlackFemaleMiddleAged.jpg.png	0		0	0	0	0		0			0	0	0	1	0		0	0		0	0	0	0	0	0	0	0	0	0	0	0	0	0	0	0	0	0	0	0
v1_img2img_BlackFemaleYoungAdult.jpg.png	0	0	0	0	0	0	0	0	0	0	0	0	0	0	0	0	0	0		0	0	0	0	0	0	0	0	0	0	0	0	0	0	0	0	0	0	0	0
v1_img2img_BlackMaleElderly.jpg.png	1	1	0	0	1	0	1	0	1	1	1	0	1	1	1	0	0		1	1	1	1	0	1	1	1	0	1	1	1	1	1	1	1	0	1	1	1	1
v1_img2img_BlackmaleMiddleAged.jpg.png	0	0	0	0	0	0	0	0	0	0	0	0	0	0	0	0	0	0	0	0	0	0	0	0	0	0	0	0	0	0	0	0	0	0	0	0	0	0	0
v1_img2img_BlackMaleYoungAdult.jpg.png	0	0	0	0			0	0	0	0	0	0	0	0	0	0	0		0	0	0	0	0	0	0		0	0	0	0	0	0	0	0	0	0	0		0
v1_img2img_WhiteFemaleElderly.jpg.png			0	0		1	0	0		0	1	1	0	1	0	0	0			0	0	0	0	0	0		1	0	0	0	0	1	0		0	0		1	0
v1_img2img_WhiteFemaleMiddleAged.jpg.png	1	0	0	0	0	0	0	0	0	0	0	0	0	0	0	0	0	0	0	0	0	0	1	0	0	0	0	0	0	0	0	0	0	0	0	0	0	0	0
v1_img2img_WhiteFemaleYoungAdult.jpg.png	0	0	0	0	0	0	0	0	0	0	0	0	0	0	0	0	0	0		0	0	0	0	0	0	0	0	0	0	0	0	0	0	0	0	0	0	0	0
v1_img2img_WhiteMaleElderly.jpg.png		0	0			0	0	0	0	0	1	0	0	1						0	1	0	0		1	0	1	0	1	0	0	0	0	0	0	1	0		0
v1_img2img_WhiteMaleMiddleAged.jpg.png	1	0	1	1	0	1	1	0	1	0	1	0		1	0	1	0	0	1	1	1	0	0	0	1	0	1	1	0	0	0	1	1	0	0	0	0	0	0
v1_img2img_WhiteMaleYoungAdult.jpg.png	0	0	1	0	0	0	0	0	0	0	0	0	0	0	0	0	0	0	0	0	0	0	0	0	0	0	0	1	0	0	0	0	0	0	0	0	0	0	0
SDXLsmaller	6	2	2	5	1	3	5	1	4	1	5	1	2	7	1	3	1	1	7	2	6	2	3	5	4	1	4	6	4	4	2	5	4	1	1	3	1	5	2
midjourney smaller
AsianFemaleElderly.png	0	0	0	0	0	0	0	0	0	0	0	0	0	0	0	0	0	0	0	0	0	0	0	0	0	0	0	0	0	0	0	0	0	0	0	0	0	0	0
AsianFemaleMiddleAged.png	0	0	0	0	0	0	0	0	0	0	0	0	0	0	0		0	0	0	0	0	0	0	0	0	0	0	0	0	0	0	0	0	0	0	0	0	0	0
AsianFemaleYoungAdult.png	0	0	0	0	0	0	0	0	0	0		0	0	0	0	0	0	0	0	0	0	0	0	0	0	0	0	0	0	0	0	0	0	0	0	0	0	0	0
AsianMaleElderly.png	0		0	0	0		0	0	0			0	0	0	0		0	0	0	0	0	0	0	0	0	0	0	0	0	0	0	0	0	0	0	0	0	0
AsianMaleMiddleAged.png	0	0	0	0	0	0	0	0	0	0	0	0	0	0	0	0		0	0	0	0	0	0	0	0	0	0	0	0	0	0	0	0	0	0	0	0	0	0
AsianMaleYoungAdult.png	0	0	0	0	0	0	0	0	0	0	0	0	0	0	0			0	0	0	0	0	0	0	0	0	0	0	0	0	0	0	0	0	0	0	0	0	0
BlackFemaleElderly.png	0		0	0	0	0	0	0	0	0		0	0	0	0			0	0	0	0	0	0	0	0	0	0	0	0		0	0	0	0	0	0	0	0	0
BlackFemaleMiddleAged.png	0	0			0	0	0	0	0	0	0	0	0	0	0		0	0	0	0	0	0	0	0	0	0	0	0	0	0	0	0	0	0	0	0	0	0
BlackFemaleYoungAdult.png	0	0	0	0	0	0	0	0	0	0	0	0	0	0	0		0	0	0	0	0	0	0	0	0	0	0	0	0	0	0	0	0	0	0	0	0	0	0
BlackMaleElderly.png	0		0	0	0	0	0	1	0	0		1	0	0	0			0	0	0	0	0	0	0	0	1	0	0	0	0	0	0	0		0	0	0	0	0
BlackMaleMiddleAged.png	0			0	0	0	0	0	0	0	0	0	0	0	0			0	0	0	0	0	0	0	0	0	0	0	0	0	0	0	0	0	0	0	0	0	0
BlackMaleYoungAdult.png	0			0	0	0	0	0	0	0		0	0	0	0		0	0	0	0	0	0	0	0	0	0	0	0	0	0	0	0	0	0	0	0	0	0	0
WhiteFemaleElderly.png	0	0	0	0	0	0	0	0	0	0	0	0	0	0	0		0	1	0	0	0	0	0	0	0	0	0	0	0	0	0	0	0		0	0	0	0	0
WhiteFemaleMiddleAged.png	0	0		0	0	0	0	0	0	0	0	0	0	0	0	0	0	0	0	0	0	0	0	0	0	0	0	0	0	0	0	0	0	0	0	0	0	0	0
WhiteFemaleYoungAdult.png	0	0	0	0	0	0	0	0	0	0	0	0	0	0	0	0	0	0	0	0	0	0	0	0	0	0	0	0	0	0	0	0	0	0	0	0	0	0	0
WhiteMaleElderly.png	0				0	0	0	0	0	0		0	0	0	0	0	0		0	0	0	0	0			0	0	0	0			0	0	0	0		0	0
WhiteMaleMiddleAged.png	0		0	0	0	0	0	0	0	0		0	0	0	0	0		0	0	0	0	0	0	0	0	0	0	0	0	0	0	0	0	0	0		0	0
WhiteMaleYoungAdult.png	0	0	0		0	0	0	0	0	0	0	0	0	0	0		0	0	0	0	0	0	0	0	0	0	0	0	0	0	0	0	0	0	0	0	0	0	0
midjourney smaller	0	0	0	0	0	0	0	1	0	0	0	1	0	0	0	0	0	1	0	0	0	0	0	0	0	1	0	0	0	0	0	0	0	0	0	0	0	0	0
pix2pix smaller
AsianFemaleElderly.png	0	1	0		0	1	0	0			0	1	0	0	0	0			0	0	1	0	0	0	0	1	0	0	0	1		0	1	0	0	0	0	0	0
AsianFemaleMiddleAged.png	1		1		1		1	1			1	0	0	1	1	1	1		1	0	1	0	0	1			0	1	1			0	0	0	0	1	1	1	1
AsianFemaleYoungAdult.png	0		0	0			0	0				0	0	0	0	0	0		0		0	0	0	0	0		0	0	0			0	0	0	0	0	0	0
AsianMaleElderly.png	0	1		1		1	0	0	0		0	0	0	0	1	0	1		1		1	0	0	0	0			0	1			0	0	0	0	0	0	0	1
AsianMaleMiddleAged.png	0		0			0	0	0				1	1	0	1	0	0		1	1	0	0	0	0	0		0	1	0			1	1		0	0	0	0	1
AsianMaleYoungAdult.png	0		0	0		0		0			0	0	0	0	0	0	0		0	0	0	0	0	0	0		0	0	0			0		0	0	0	0
BlackFemaleElderly.png	0		0			0	0					1	0	0	0	0	1		1		0	1	0					0	0			1		0	0	0		0
BlackFemaleMiddleAged.png	0	0	0		0	0	0	0		0	0	0	0	0	0	0	0		0	0	0	0	0	0	0		0	0	0		1	0	0	0	0	0	0	0	0
BlackFemaleYoungAdult.png	0	0	0	0		0	0	0		0	0	0	0	0	0	0	0		0	0	0	0	0	0	0			0	0	0	0	0	0	0	0	0	0		0
BlackMaleElderly.png	1	1	0	0		1		0			1	1	1		1	0	0		0	1	0	1	0	0	1		1	1	1			1	0	1	0	0	1	0	1
BlackMaleMiddleAged.png	0		0	0	0		0	0				0	0	0	0	0	0		0		0	0	0	0	0		0	0	0	0		0		0	0	0	0	0	1
BlackMaleYoungAdult.png	0				0		0	0				0	0	0		0	0		0		0	0	0	0			0	0	0			0		0	0	0	0	0
WhiteFemaleElderly.png	0	1	0		0	0	0	0		0		1		0	0	0	0		1		0	0	0	0	0	0	0	1	0	1		0	1	0	0	0	0	0	1
WhiteFemaleMiddleAged.png	0	0	0	0	0		0	0			0	0	0	0	0	0	0		0	0	0	0	0	0	0		0	0	0			0	1	0	0	0	0	0
WhiteFemaleYoungAdult.png	0	0	0	0	0	0	0	0		0	0	0	0	0	0	0	0		0	0	0	0	0	0	0			0	0		0	0	0	0	0	0	0	0	0
WhiteMaleElderly.png	0		1			1		1				0	0		0	0	1				0	0	0			1	1	1	1					0	0	0	0	0
WhiteMaleMiddleAged.png	1		1	0	0	1	0	0				0	0	0	0	0	1		1	0	0	0	0	0	0		0	1	0			0	0	0	0	0	0	0	0
WhiteMaleYoungAdult.png	0	0	0	0		0		0	0			0	0	0	0	0	0		0	0	0	0	0	0	0		0	0	0			0	0	0	0	0	0	0	0
	3	4	3	1	1	5	1	2	0	0	2	5	2	1	4	1	5	0	6	2	3	2	0	1	1	2	2	6	4	2	1	3	4	1	0	1	2	1	6
	-47	-52	8	-37	-10	-16	-4	2	-13	14	-44	-53	-12	-53	-53	-52	15	-15	-26	20	-35	-22	-34	-42	-30	-38	15	-36	10	-39	-11	-37	-38	-18	-14	-21	1	-54	13
	-36	-37	-37	-42	-26	-37	-36	-27	-39	-31	-20	-39	-31	-32	-56	-41	-40	-15	-4	2	-30	-12	-29	-37	-24	-16	-5	-30	-35	-33	-36	-33	-25	-34	-31	-29	-24	-32	-31
	5	-13	-10	-11	-32	14	-1	12	-16	11	-3	-6	-9	-5	-11	-11	5	0	13	-4	-12	-2	11	-28	5	17	24	4	-5	20	-3	-7	-9	8	3	-4	-4	0	28
	-21	-43	-35	-31	-43	-37	-44	-27	-36	-29	-45	-26	-28	-35	-40	-39	-34	-42	-41	-38	-37	-14	-23	-42	-29	-15	11	-25	-38	-31	-27	-41	-41	-31	-37	-36	-16	-34	-15
	-36	-44	-17	-5	-34	-27	-52	1	-33	-16	-34	-31	-37	-29	-39	-26	-16	-38	-31	17	-32	1	5	-48	-5	-24	-18	-33	-45	-22	-46	-27	-17	-31	-30	-31	5	-42	-20
	3	-22	22	21	3	-8	-9	44	6	22	5	-3	2	7	-16	-14	-2	14	5	42	6	53	2	3	32	11	45	-1	16	24	-2	-2	6	7	16	25	42	-1	7
	-33	-64	-37	-34	-38	-22	-21	-9	-38	-40	-33	-37	-41	-35	-32	-4	#VALUE!	-23	-39	3	-33	3	-6	-55	-49	-50	-8	-35	2	-10	-43	-36	-28	-34	-22	-41	7	-36	-64
	-14	-16	-12	-7	-18	-16	10	13	-10	14	-17	-16	8	-16	-18	0	-14	-16	-11	4	-4	26	5	-15	23	-18	21	-8	26	-9	-1	-9	1	-17	20	-11	15	-6	1
	5	15	-5	-4	-10	-1	-9	37	-8	9	-12	-5	11	2	-8	-2	-2	-2	-8	1	-1	-2	-1	-5	6	5	-2	-6	-10	5	-7	-4	2	-4	-6	-4	1	-1	3
	-50	-77	-52	-54	-48	-38	-52	-24	-45	-52	-57	-54	-46	-53	-58	-47	-50	-47	-51	-15	-57	-46	-49	-28	-40	-50	-54	-52	-47	-51	-53	-46	-54	-48	-54	-50	-18	-39	-47
	-12	0	-9	-17	-11	-11	-14	0	-12	-15	-19	-14	-13	-10	-14	9	-15	-10	-17	11	-12	-3	-16	-5	-6	6	-10	-10	-14	-6	-14	-11	-13	-15	-12	-13	-13	-4	-13
	-3	-10	6	-2	1	-5	-8	16	-1	-4	2	-6	4	-1	-7	-2	0	-1	-5	-1	2	-2	0	-5	-3	-11	37	-5	-15	30	1	2	20	-4	4	1	-3	-1	11
	-53	-61	-55	-58	-55	-38	-57	-25	-56	-58	-54	-52	2	-53	-45	-18	#VALUE!	-39	#VALUE!	-54	-39	17	-3	-56	-32	-58	-19	-7	-58	-37	-56	-38	-3	-57	13	-9	14	-56	0
	-3	-9	-14	-10	-18	-1	-6	17	-11	5	5	-17	13	-2	-31	-16	-14	2	6	28	-5	17	15	-9	2	-4	13	7	-16	9	-14	-13	-2	-11	-5	-13	4	-11	-2
	1	-20	-9	-7	8	5	-3	27	2	24	-9	-5	18	15	-8	23	14	1	5	17	1	13	19	-1	17	20	17	1	0	8	2	9	-1	14	0	6	-1	21	19
	-64	-32	-58	-4	-60	-27	-48	-52	-50	-21	-12	-13	-78	-74	-7	-78	-15	-29	-50	-71	-51	-10	-53	-16	-4	-15	-7	-21	-6	-18	-59	-47	-19	-9	-14	-65	-10	-39	-75
	-28	-23	-32	-31	-32	-30	-22	-16	-32	-25	-43	-26	-22	-29	-30	-31	-30	-33	-29	-14	-30	-30	-21	-25	-12	-30	33	-32	-30	-25	-34	-27	-19	-25	-29	-31	0	-32	-30
	19	13	0	-5	4	1	6	12	-5	-1	-7	-2	1	-3	-7	-2	-3	#VALUE!	-6	29	-7	-1	0	0	-5	-7	13	-2	-4	10	-4	-3	2	1	-4	-4	10	-3	-6
	-38	-12	-54	-50	-14	-12	-27	-27	-25	-25	-42	-9	-24	-33	-54	-55	-23	-25	-16	-30	-3	23	-52	-28	-15	9	-26	-14	-36	-40	17	-21	1	-25	14	-19	-15	-15	-17
	-36	-62	-57	-36	-32	-55	-25	-13	-20	-62	-15	-33	-30	-21	-26	-34	-62	-62	-32	-62	17	-11	14	-36	-62	-15	-62	-21	-20	-13	-39	-26	-25	-37	8	-25	-62	-33	-33
	-13	40	-29	0	-36	15	-24	2	10	3	-13	0	-36	-36	7	-36	-9	-8	-3	-16	33	47	1	10	#VALUE!	14	21	-11	-5	-1	18	34	24	30	17	-36	-36	-4	-14
	-64	5	-12	8	-14	-64	-31	-29	-31	-25	-61	-12	-34	-15	-31	-31	-64	-33	-36	-15	11	16	-19	-31	-34	16	-64	-34	9	-18	-21	-64	-64	14	10	-26	-64	-26	-27
	20	-22	-57	-30	-13	-53	-45	-1	24	19	-35	-59	25	-59	-3	-56	12	-28	-26	-59	19	2	18	-18	-28	21	-19	12	24	19	-25	21	-9	-38	8	16	11	-27	-2
	7	2	-13	25	19	-3	5	-22	-1	21	14	-22	-22	10	10	-19	-22	-22	7	14	38	13	0	2	-22	31	6	31	3	-22	-2	0	27	-22	8	14	34	21	11
	-61	-64	-60	21	-64	-14	-64	-64	6	-64	-22	-35	-64	-64	-21	-64	-64	-64	-36	-26	-61	-6	16	-64	-39	13	-64	-64	-24	-32	-37	-31	-64	-3	10	-64	-64	-31	-14
	-24	33	-31	-27	-7	12	-10	0	-8	-6	-12	-26	-19	3	-16	-40	5	-24	-12	-12	-29	34	-17	-13	38	-18	5	-16	-11	-21	-3	-15	-12	-23	22	-15	-2	-5	-15
	35	7	5	-24	6	27	9	0	12	14	1	0	14	-31	25	-9	-31	19	2	-31	-24	40	-6	-4	1	26	18	#VALUE!	8	34	23	-5	46	37	41	7	6	7	27
	-34	-26	-21	-77	-38	-42	-47	-30	-43	-27	-37	-51	-47	-42	-48	-72	-25	-43	-35	-45	-49	-47	-36	-21	-55	-77	-49	-28	-37	-77	-51	-40	1	-13	-25	-51	-28	-15	-39
	0	22	-6	-6	1	5	0	12	-5	1	-9	-8	-2	9	2	-1	-3	5	-9	-3	-8	-6	-9	5	7	-1	-10	-16	1	-38	-8	-10	24	-3	-14	-9	5	-5	-5
	3	26	-1	2	-26	4	4	10	-2	10	0	0	-4	6	6	-26	7	-26	-1	15	23	-3	#VALUE!	-12	13	31	-26	-26	8	-4	-1	0	-1	-26	38	-3	-1	3	0
	-57	-61	-57	15	-61	12	-37	-22	15	-31	-53	-61	-31	-61	-2	-55	-61	-61	-5	-61	-51	-56	-58	-61	-14	-49	-25	-61	5	-61	-24	-57	-10	-39	6	-39	-38	-44	-26
	-38	0	-38	3	4	29	-26	-10	21	-6	12	-14	-8	-4	30	-35	-10	18	-12	22	25	35	-4	32	34	41	-7	24	38	-32	3	22	28	29	1	-10	-38	22	-10
	-17	52	-8	-14	36	29	4	1	47	12	6	18	23	55	41	-26	-27	31	2	12	36	44	19	12	-3	41	3	13	47	-4	36	2	29	31	42	0	33	6	22
	-78	-5	-12	-78	-3	-25	-55	-78	0	-2	-78	-48	-39	-51	-24	-78	-78	-5	-78	-38	1	-9	-46	-78	5	-8	-78	-1	-3	-43	-78	-78	-23	-5	-11	-78	-78	6	-1
	-43	33	-29	-39	-1	-15	-26	-53	-34	-15	-20	-29	-11	-47	-16	-45	13	-25	-32	-53	-30	14	-24	-25	-14	-8	-53	-16	-17	-25	-28	-33	-53	-49	-14	-4	25	-30	-9
	-28	56	-5	-21	-3	39	12	10	-28	25	-6	-28	-21	-7	-7	-14	9	3	15	-3	46	18	-2	28	-20	31	24	-8	-1	29	4	-4	-28	25	44	9	1	54	-11
	-54	2	19	-53	-58	-20	7	9	6	23	8	25	12	-50	-13	-43	-37	-58	-27	19	-28	-32	19	-53	-29	-58	-58	-35	-50	-23	-20	-28	-35	-58	16	1	21	-53	16
	-14	12	-2	14	-62	17	0	13	29	21	9	-1	24	13	12	21	-1	0	-40	10	-15	-20	12	9	16	11	4	-26	4	-14	-2	-4	-17	11	5	16	7	6	24
	-16	-27	-14	-30	-3	-30	-29	-32	-18	-36	-16	-16	-15	-19	-15	-23	-17	-15	-8	-17	44	-16	-29	-31	9	-18	-4	-14	-17	-17	-15	-13	-14	-15	-16	2	-11	-15	-26
	-27	12	-20	-34	-64	-17	-64	34	-41	-6	16	-8	-33	7	30	0	-64	-64	-59	-15	-13	3	-38	12	11	19	-12	-39	-21	-43	-41	-35	-64	2	-6	-64	12	-13	7
	-59	24	4	22	13	5	-55	15	11	20	-40	20	8	0	-8	28	-59	-59	-34	14	-29	5	12	-52	18	-8	15	15	27	3	21	-14	17	16	28	-19	16	-53	13
	-22	-22	50	-14	-22	28	11	50	19	53	54	-2	0	43	32	53	18	51	-10	54	42	22	56	-15	5	43	1	63	25	24	50	56	11	59	42	56	3	-22	-22
	-42	-64	-4	-43	-64	-64	-43	12	-40	-64	-18	-18	8	-58	-64	1	-16	-37	-44	11	-38	13	14	-41	8	-64	-48	12	16	-26	32	-13	-21	11	-40	-32	-9	-51	12
	-18	-40	2	40	-16	37	-40	17	-40	-40	7	22	40	-32	19	-40	26	-3	-40	19	7	-2	27	41	-14	35	22	-16	34	3	33	-20	0	18	18	5	-13	39	40
	-12	-11	-12	-6	12	-13	-5	25	-11	-7	-11	-11	-13	-11	-12	-9	-6	8	-31	-4	19	-7	4	-5	-11	-10	-5	-10	-12	8	-12	-4	13	-8	-9	-8	-6	-11	19
	-41	-36	-3	-6	-39	-7	-38	-5	-49	-37	-39	-3	-47	-67	-49	-8	-18	-77	-52	-38	-48	-48	-16	-68	-42	-41	-10	-38	-30	-43	-32	-50	-49	-47	-15	-30	-41	-72	-41
	41	46	-9	0	6	42	6	40	24	19	15	39	10	37	32	37	7	20	-9	43	-9	38	38	-3	1	-2	-2	7	37	1	-13	-17	11	30	39	35	34	39	-7
	-7	-18	48	27	-26	-26	16	45	-2	-18	-3	-8	2	-14	8	-3	21	-26	-1	-2	6	3	13	-3	-6	-26	-13	-5	-5	2	44	-3	27	2	55	1	49	-26	2
	-61	-61	19	19	-61	-52	23	18	-61	23	-29	-52	-20	-54	21	22	#VALUE!	-61	-61	26	28	8	15	14	8	-61	-34	17	15	-17	9	-37	11	-61	14	14	-61	-23	1
	-21	-13	-13	-12	-6	-14	-14	30	-14	34	-16	-17	-15	-17	-18	-15	-8	5	-17	-2	-3	-19	-34	-17	-18	2	-15	-14	-12	-10	-4	-18	-4	-15	16	2	-15	-16	-1
	4	37	-5	-6	-8	21	-20	5	-9	-9	-1	-3	-9	-17	39	-12	5	-1	-29	-8	-9	0	-10	-7	-1	-4	-5	-9	-2	2	-9	-10	2	17	24	-10	40	12	-7
	-78	-6	-5	-78	-78	-15	5	2	-7	0	-54	1	5	-30	-78	-78	-78	-78	-78	-5	-48	-3	10	-78	-55	2	-54	-2	-51	-10	0	-2	-8	-1	5	-42	11	-78	-3
	-29	22	-25	-32	-10	-32	-45	29	-47	21	-29	16	-53	-36	27	-33	-14	-18	-29	-33	-28	-14	-14	13	-23	12	-33	-22	-19	-20	17	-30	-21	16	24	16	22	23	-14
	39	47	-22	37	-6	43	5	41	9	46	51	24	35	-8	43	-12	41	23	-5	44	28	1	30	32	33	18	42	-24	6	17	37	-4	15	48	31	37	43	0	41
	0.5	14.25	11.5	12.5	-3	14.25	7.5	-13	8.5	3.5	4.25	-10.5	19.5	5.25	0.75	2	17.5	3.75	0.75	17.75	9.75	17.5	9	22.25	15.25	-13.5	8	5	16.75	1.25	-7.25	5.5	-11.75	15.5	22.75	7	14.25	17.25	7.75
	9	-8.5	17.25	13.25	1.25	4	9.25	-1.75	-0.25	-2.75	3.75	2	15.75	-11.75	-0.5	#VALUE!	9.25	-19.25	5.25	15.5	10.25	12.5	12.75	17.75	9.5	-6.25	14.75	12.5	19.5	-1.75	-6.25	10.25	0.5	-6.75	17.5	5	11.25	8.75	4.75
	-13.25	-8	-10.75	-10.25	-12.5	-13	-3.75	-11.75	-14	-13.25	#VALUE!	-16.75	-6.75	-14.25	-13.75	-14.75	-14.5	-12.25	-14.75	-10.5	-13.5	-10.25	-2.75	-6.25	-7.75	-13.75	-8.5	-10.5	-4	-2.5	-15.25	-13.25	-17	-10.75	-4.5	-8	-7.5	-1	-8.5
	6.25	#VALUE!	-6.5	9.5	0	#VALUE!	8	-1	5.5	#VALUE!	#VALUE!	-1	15	13.5	-1.75	#VALUE!	-4	-0.5	-1.25	14.25	9.5	17.25	-7.75	13	9.25	-9.75	17.5	8.25	10.25	0.75	-14.25	16	2	-5.25	17.5	14.5	5.25	-14	#VALUE!
	11	13.75	-4	9.5	12.5	19	11.75	3.5	11.25	5.25	2.5	4.75	20.25	10.25	9.75	20.75	#VALUE!	-9	11.75	17.75	17	14.5	14.75	17.75	19.5	-2	19	9.75	22.25	-3.5	4.25	-5.5	3.25	5.25	20.25	16.25	14	10.25	20.75
	14.25	22.75	28.5	28	26.25	20	16.75	6.75	14.75	12	13	5	24.25	14.75	22.25	#VALUE!	#VALUE!	8.25	14	23.75	21	31.25	24	27.75	31.5	0.75	16.75	27.25	27.5	10.75	13.5	15.5	16.25	20.5	32.75	29.75	25.75	25.75	16.5
	3.25	#VALUE!	-3	9.75	-7.25	6	8.25	-16.25	1.25	-2	#VALUE!	5.5	11.75	5	-2.25	#VALUE!	#VALUE!	-1	6	9.5	3.75	12	-2	13.5	16	-15.75	8.75	-7.75	11.25	#VALUE!	1.25	0.25	-9	-6.5	12	6	7.5	-1.25	7.5
	11.75	19.5	#VALUE!	#VALUE!	14	27.25	12	9	16.75	16	17.5	25.25	25.25	18.5	8	#VALUE!	14.5	6	18	27	10	30.75	25.75	22.75	24	-5	25.5	21.75	26.75	12.5	6.25	9	23.75	19.5	31.25	27.5	28.5	1.75	#VALUE!
	18	19	10.25	19	10.75	23.5	14.75	7.75	13.5	8.25	11	16.25	26.75	22	10.25	#VALUE!	19.25	6.25	15.5	27.25	10.5	19	20.25	23.75	17.75	1	14.25	5.75	30.25	10	18	8.25	15.25	26.25	24.5	13	16	21.5	8.75
	-11.75	#VALUE!	-19.5	2	-4.75	0.75	-0.75	-31.5	-6.5	-17	#VALUE!	-32.75	-3.5	-16.5	-10.25	#VALUE!	#VALUE!	-19.5	-14.75	7.25	-0.75	-5.25	1.75	1.5	7	-33.5	6.5	-5	1.5	-16.5	-12.25	-18.5	-16.25	#VALUE!	4.75	-6.75	0.5	-8.5	-3.25
	0.5	#VALUE!	#VALUE!	1	2.25	2.75	0.75	-3.75	4.25	2.75	2.25	-4.5	11	-8	0.25	#VALUE!	#VALUE!	-4.75	-2	2	0.25	5	-1.5	11	12	-7.5	5.25	-5.5	23.5	2.25	7	-0.75	-1.75	5.5	10	7	9.25	10	-5.5
	-0.5	#VALUE!	#VALUE!	6.5	1.75	9	4.25	1	-1	3.75	#VALUE!	-2.75	29.25	9.75	20	#VALUE!	25.5	-1.5	0.5	16.5	18	34.5	19.25	14	23	-4.5	14.5	17.25	30.25	4	13.75	5.75	8.25	4.75	39	10.25	10.5	12	7.75
	1.75	7	0	3	-6.25	9.75	8	-7	0	-1	-8.25	-6.75	8	5.25	-1	#VALUE!	-3.5	-21.5	0.75	15.5	13.5	8	7.75	5.75	10.5	-18.75	17.25	2.25	-3.5	-11	6.75	-11.25	-2	#VALUE!	9.5	9.25	6.25	10.75	10.25
	8	10.5	#VALUE!	22.25	23	9.5	15.5	2.75	7.5	7.5	8.5	3.25	19.75	20.25	16.5	6.5	14.25	8.5	10.75	23.5	12.25	20.5	10	22.5	24	-2.25	22	22.75	25.5	11.25	6.5	6.25	14.75	18	21.5	20.75	11	10.5	16
	0	1	7	30.75	8	14.5	14.25	1.5	-0.75	0	-4.75	-9.75	21	21.25	1	-1.5	1.75	-3.25	-0.75	23.25	20.5	24.5	12.75	23.25	15.25	-4	13.25	14.5	15.5	16.75	2.75	5.25	6.75	11.25	29.5	7.25	9.75	11.75	12.5
	1.25	#VALUE!	#VALUE!	#VALUE!	-3.75	-2.25	3.5	0.75	-0.25	0.25	#VALUE!	-11.75	-0.25	3.25	-9	2	-4.25	#VALUE!	-8.25	3.25	8.75	7.75	-7.25	#VALUE!	#VALUE!	-17.5	4.75	-0.5	1.5	#VALUE!	#VALUE!	-1	2.25	-2.5	6.25	#VALUE!	6	5	#VALUE!
	-2.5	#VALUE!	10	16.25	15.5	14.25	2.5	5	0.75	5	#VALUE!	-3.5	19.5	12	4.5	10.25	#VALUE!	3.5	-5.5	14	14.75	12	15	8.25	11.75	-5	10.5	23.75	9.25	-4.5	1.5	-1.5	2.75	-3	17.75	#VALUE!	9	13	#VALUE!
	-3.5	1.75	10.5	#VALUE!	4.25	10.75	6.75	4.75	-2	4.25	-1.25	-6.25	12.25	3.25	0.5	#VALUE!	8.75	16.5	-1.75	15.75	26.5	16.5	5.75	16.5	13.25	-5	9.75	16.75	20	1.75	8.75	1.75	2	13.5	17	13.5	9.5	12	4.75
	0	0	0	0	0	0	0	0	0	0	0	0	0	0	0	0	0	0	0	0	0	0	0	0	0	0	0	0	0	0	0	0	0	0	0	0	0	0	0

## Sheet: Sheet1
sd1.5	bathing	bowing	buying	clapping	climbing	cooking	crawling	crying	dancing	digging	diving	dreaming	drinking	eating	fighting	giving	hugging	jumping	kissing	knitting	laughing	listening	painting	playing	reading	riding	sewing	singing	sitting	skiing	sleeping	smelling	snoring	standing	talking	thinking	waiting	washing	writing
older	5	2	3	1	4	3	2	10	2	7	3	0	8	3	0	2	5	4	5	11	3	7	6	1	6	5	10	3	4	7	2	2	5	4	5	3	9	1	7
smaller	13	11	14	17	14	15	16	7	16	11	15	18	9	15	18	14	12	13	13	7	15	11	10	16	12	13	8	15	13	11	16	16	13	14	12	15	8	16	9
	-8	-9	-11	-16	-10	-12	-14	3	-14	-4	-12	-18	-1	-12	-18	-12	-7	-9	-8	4	-12	-4	-4	-15	-6	-8	2	-12	-9	-4	-14	-14	-8	-10	-7	-12	1	-15	-2
sd2.1	bathing	bowing	buying	clapping	climbing	cooking	crawling	crying	dancing	digging	diving	dreaming	drinking	eating	fighting	giving	hugging	jumping	kissing	knitting	laughing	listening	painting	playing	reading	riding	sewing	singing	sitting	skiing	sleeping	smelling	snoring	standing	talking	thinking	waiting	washing	writing
older	4	10	1	6	5	9	5	5	7	8	4	1	3	5	7	0	5	5	4	4	10	11	6	6	7	11	6	5	9	3	6	4	8	6	14	4	7	7	3
smaller	9	4	16	9	9	8	11	7	9	8	12	10	12	8	11	13	6	8	13	9	8	7	11	9	9	6	6	10	9	11	11	10	6	10	4	10	5	11	14
	-5	6	-15	-3	-4	1	-6	-2	-2	0	-8	-9	-9	-3	-4	-13	-1	-3	-9	-5	2	4	-5	-3	-2	5	0	-5	0	-8	-5	-6	2	-4	10	-6	2	-4	-11
SDXL	bathing	bowing	buying	clapping	climbing	cooking	crawling	crying	dancing	digging	diving	dreaming	drinking	eating	fighting	giving	hugging	jumping	kissing	knitting	laughing	listening	painting	playing	reading	riding	sewing	singing	sitting	skiing	sleeping	smelling	snoring	standing	talking	thinking	waiting	washing	writing
older	3	8	6	6	3	7	7	16	6	9	7	7	9	4	10	6	7	5	0	9	7	8	12	6	9	8	5	5	8	8	8	1	8	11	13	11	11	5	10
smaller	11	6	12	10	7	9	8	2	10	5	11	11	7	13	6	9	8	5	13	9	11	9	6	11	9	6	12	13	10	10	9	17	8	5	5	6	6	9	7
	-8	2	-6	-4	-4	-2	-1	14	-4	4	-4	-4	2	-9	4	-3	-1	0	-13	0	-4	-1	6	-5	0	2	-7	-8	-2	-2	-1	-16	0	6	8	5	5	-4	3
Midjourney	bathing	bowing	buying	clapping	climbing	cooking	crawling	crying	dancing	digging	diving	dreaming	drinking	eating	fighting	giving	hugging	jumping	kissing	knitting	laughing	listening	painting	playing	reading	riding	sewing	singing	sitting	skiing	sleeping	smelling	snoring	standing	talking	thinking	waiting	washing	writing
older	12	9	7	14	11	15	16	10	10	11	8	7	15	14	11	5	8	7	10	17	16	16	13	16	16	2	17	13	16	10	12	11	12	10	17	14	17	14	11
smaller	5	2	5	1	6	2	2	8	7	5	3	11	3	4	7	2	4	10	8	1	2	2	5	1	1	16	1	5	2	6	5	7	6	6	1	2	1	4	3
	7	7	2	13	5	13	14	2	3	6	5	-4	12	10	4	3	4	-3	2	16	14	14	8	15	15	-14	16	8	14	4	7	4	6	4	16	12	16	10	8

## Sheet: 拉threshold之后
sd1.5	bathing	bowing	buying	clapping	climbing	cooking	crawling	crying	dancing	digging	diving	dreaming	drinking	eating	fighting	giving	hugging	jumping	kissing	knitting	laughing	listening	painting	playing	reading	riding	sewing	singing	sitting	skiing	sleeping	smelling	snoring	standing	talking	thinking	waiting	washing	writing
older	0	0	1	1	0	0	0	3	0	2	0	0	0	0	0	1	0	0	0	3	0	2	0	0	2	0	5	0	1	2	0	0	0	0	0	1	1	1	1
smaller	9	6	7	7	9	8	8	5	8	7	7	8	6	9	9	6	4	7	7	3	9	3	6	9	6	6	1	8	6	7	8	9	5	7	6	8	1	9	4
	-9	-6	-6	-6	-9	-8	-8	-2	-8	-5	-7	-8	-6	-9	-9	-5	-4	-7	-7	0	-9	-1	-6	-9	-4	-6	4	-8	-5	-5	-8	-9	-5	-7	-6	-7	0	-8	-3
sd2.1	bathing	bowing	buying	clapping	climbing	cooking	crawling	crying	dancing	digging	diving	dreaming	drinking	eating	fighting	giving	hugging	jumping	kissing	knitting	laughing	listening	painting	playing	reading	riding	sewing	singing	sitting	skiing	sleeping	smelling	snoring	standing	talking	thinking	waiting	washing	writing
older	1	7	0	2	1	4	0	0	3	2	0	0	2	1	3	0	0	1	0	1	6	6	0	2	2	7	2	2	3	2	2	3	6	5	5	0	3	3	2
smaller	7	2	9	7	2	4	10	4	4	4	6	6	7	5	6	9	3	6	6	4	6	2	5	5	4	1	3	3	3	6	7	6	2	6	1	4	2	6	4
	-6	5	-9	-5	-1	0	-10	-4	-1	-2	-6	-6	-5	-4	-3	-9	-3	-5	-6	-3	0	4	-5	-3	-2	6	-1	-1	0	-4	-5	-3	4	-1	4	-4	1	-3	-2
SDXL	bathing	bowing	buying	clapping	climbing	cooking	crawling	crying	dancing	digging	diving	dreaming	drinking	eating	fighting	giving	hugging	jumping	kissing	knitting	laughing	listening	painting	playing	reading	riding	sewing	singing	sitting	skiing	sleeping	smelling	snoring	standing	talking	thinking	waiting	washing	writing
older	2	5	2	4	0	5	1	8	2	7	2	4	3	2	7	5	3	2	0	4	4	2	4	2	1	2	2	1	4	1	6	1	1	3	7	3	6	3	3
smaller	6	2	2	5	1	3	5	1	4	1	5	1	2	7	1	3	1	1	7	2	6	2	3	5	4	1	4	6	4	4	2	5	4	1	1	3	1	5	2
	-4	3	0	-1	-1	2	-4	7	-2	6	-3	3	1	-5	6	2	2	1	-7	2	-2	0	1	-3	-3	1	-2	-5	0	-3	4	-4	-3	2	6	0	5	-2	1
Midjourney	bathing	bowing	buying	clapping	climbing	cooking	crawling	crying	dancing	digging	diving	dreaming	drinking	eating	fighting	giving	hugging	jumping	kissing	knitting	laughing	listening	painting	playing	reading	riding	sewing	singing	sitting	skiing	sleeping	smelling	snoring	standing	talking	thinking	waiting	washing	writing
older	0	1	1	3	2	2	0	0	0	0	0	1	6	3	1	1	1	0	0	5	3	5	3	6	4	0	2	4	7	0	0	0	1	2	8	3	2	2	1
smaller	0	0	0	0	0	0	0	1	0	0	0	1	0	0	0	0	0	1	0	0	0	0	0	0	0	1	0	0	0	0	0	0	0	0	0	0	0	0	0
	0	1	1	3	2	2	0	-1	0	0	0	0	6	3	1	1	1	-1	0	5	3	5	3	6	4	-1	2	4	7	0	0	0	1	2	8	3	2	2	1
pix2pix	bathing	bowing	buying	clapping	climbing	cooking	crawling	crying	dancing	digging	diving	dreaming	drinking	eating	fighting	giving	hugging	jumping	kissing	knitting	laughing	listening	painting	playing	reading	riding	sewing	singing	sitting	skiing	sleeping	smelling	snoring	standing	talking	thinking	waiting	washing	writing
older	0	1	0	2	0	1	1	0	0	2	0	0	0	0	0	0	2	0	0	2	0	0	0	0	1	0	2	0	0	0	0	1	1	0	0	0	0	0	0
smaller	3	4	3	1	1	5	1	2	0	0	2	5	2	1	4	1	5	0	6	2	3	2	0	1	1	2	2	6	4	2	1	3	4	1	0	1	2	1	6
	-3	-3	-3	1	-1	-4	0	-2	0	2	-2	-5	-2	-1	-4	-1	-3	0	-6	0	-3	-2	0	-1	0	-2	0	-6	-4	-2	-1	-2	-3	-1	0	-1	-2	-1	-6

## Sheet: 新soft
bathing	bowing	buying	clapping	climbing	cooking	crawling	crying	dancing	digging	diving	dreaming	drinking	eating	fighting	giving	hugging	jumping	kissing	knitting	laughing	listening	painting	playing	reading	riding	sewing	singing	sitting	skiing	sleeping	smelling	snoring	standing	talking	thinking	waiting	washing	writing
-47	-52	8	-37	-10	-16	-4	2	-13	14	-44	-53	-12	-53	-53	-52	15	-15	-26	20	-35	-22	-34	-42	-30	-38	15	-36	10	-39	-11	-37	-38	-18	-14	-21	1	-54	13
-36	-37	-37	-42	-26	-37	-36	-27	-39	-31	-20	-39	-31	-32	-56	-41	-40	-15	-4	2	-30	-12	-29	-37	-24	-16	-5	-30	-35	-33	-36	-33	-25	-34	-31	-29	-24	-32	-31
5	-13	-10	-11	-32	14	-1	12	-16	11	-3	-6	-9	-5	-11	-11	5	0	13	-4	-12	-2	11	-28	5	17	24	4	-5	20	-3	-7	-9	8	3	-4	-4	0	28
-21	-43	-35	-31	-43	-37	-44	-27	-36	-29	-45	-26	-28	-35	-40	-39	-34	-42	-41	-38	-37	-14	-23	-42	-29	-15	11	-25	-38	-31	-27	-41	-41	-31	-37	-36	-16	-34	-15
-36	-44	-17	-5	-34	-27	-52	1	-33	-16	-34	-31	-37	-29	-39	-26	-16	-38	-31	17	-32	1	5	-48	-5	-24	-18	-33	-45	-22	-46	-27	-17	-31	-30	-31	5	-42	-20
3	-22	22	21	3	-8	-9	44	6	22	5	-3	2	7	-16	-14	-2	14	5	42	6	53	2	3	32	11	45	-1	16	24	-2	-2	6	7	16	25	42	-1	7
-33	-64	-37	-34	-38	-22	-21	-9	-38	-40	-33	-37	-41	-35	-32	-4	0	-23	-39	3	-33	3	-6	-55	-49	-50	-8	-35	2	-10	-43	-36	-28	-34	-22	-41	7	-36	-64
-14	-16	-12	-7	-18	-16	10	13	-10	14	-17	-16	8	-16	-18	0	-14	-16	-11	4	-4	26	5	-15	23	-18	21	-8	26	-9	-1	-9	1	-17	20	-11	15	-6	1
5	15	-5	-4	-10	-1	-9	37	-8	9	-12	-5	11	2	-8	-2	-2	-2	-8	1	-1	-2	-1	-5	6	5	-2	-6	-10	5	-7	-4	2	-4	-6	-4	1	-1	3
-50	-77	-52	-54	-48	-38	-52	-24	-45	-52	-57	-54	-46	-53	-58	-47	-50	-47	-51	-15	-57	-46	-49	-28	-40	-50	-54	-52	-47	-51	-53	-46	-54	-48	-54	-50	-18	-39	-47
-12	0	-9	-17	-11	-11	-14	0	-12	-15	-19	-14	-13	-10	-14	9	-15	-10	-17	11	-12	-3	-16	-5	-6	6	-10	-10	-14	-6	-14	-11	-13	-15	-12	-13	-13	-4	-13
-3	-10	6	-2	1	-5	-8	16	-1	-4	2	-6	4	-1	-7	-2	0	-1	-5	-1	2	-2	0	-5	-3	-11	37	-5	-15	30	1	2	20	-4	4	1	-3	-1	11
-53	-61	-55	-58	-55	-38	-57	-25	-56	-58	-54	-52	2	-53	-45	-18	0	-39	0	-54	-39	17	-3	-56	-32	-58	-19	-7	-58	-37	-56	-38	-3	-57	13	-9	14	-56	0
-3	-9	-14	-10	-18	-1	-6	17	-11	5	5	-17	13	-2	-31	-16	-14	2	6	28	-5	17	15	-9	2	-4	13	7	-16	9	-14	-13	-2	-11	-5	-13	4	-11	-2
1	-20	-9	-7	8	5	-3	27	2	24	-9	-5	18	15	-8	23	14	1	5	17	1	13	19	-1	17	20	17	1	0	8	2	9	-1	14	0	6	-1	21	19
-64	-32	-58	-4	-60	-27	-48	-52	-50	-21	-12	-13	-78	-74	-7	-78	-15	-29	-50	-71	-51	-10	-53	-16	-4	-15	-7	-21	-6	-18	-59	-47	-19	-9	-14	-65	-10	-39	-75
-28	-23	-32	-31	-32	-30	-22	-16	-32	-25	-43	-26	-22	-29	-30	-31	-30	-33	-29	-14	-30	-30	-21	-25	-12	-30	33	-32	-30	-25	-34	-27	-19	-25	-29	-31	0	-32	-30
19	13	0	-5	4	1	6	12	-5	-1	-7	-2	1	-3	-7	-2	-3	0	-6	29	-7	-1	0	0	-5	-7	13	-2	-4	10	-4	-3	2	1	-4	-4	10	-3	-6
-20.3889	-27.5	-19.2222	-18.7778	-23.2778	-16.3333	-20.5556	0.0555556	-22.0556	-10.7222	-22.0556	-22.5	-14.3333	-22.5556	-26.6667	-19.5	-11.1667	-16.2778	-16.0556	-1.27778	-20.8889	-0.777778	-9.88889	-23	-8.55556	-15.3889	5.88889	-16.1667	-14.9444	-9.72222	-22.6111	-20.5556	-13.2222	-17.1111	-11.2222	-18.3333	0.555556	-20.5556	-12.2778
bathing	bowing	buying	clapping	climbing	cooking	crawling	crying	dancing	digging	diving	dreaming	drinking	eating	fighting	giving	hugging	jumping	kissing	knitting	laughing	listening	painting	playing	reading	riding	sewing	singing	sitting	skiing	sleeping	smelling	snoring	standing	talking	thinking	waiting	washing	writing
-38	-12	-54	-50	-14	-12	-27	-27	-25	-25	-42	-9	-24	-33	-54	-55	-23	-25	-16	-30	-3	23	-52	-28	-15	9	-26	-14	-36	-40	17	-21	1	-25	14	-19	-15	-15	-17
-36	-62	-57	-36	-32	-55	-25	-13	-20	-62	-15	-33	-30	-21	-26	-34	-62	-62	-32	-62	17	-11	14	-36	-62	-15	-62	-21	-20	-13	-39	-26	-25	-37	8	-25	-62	-33	-33
-13	40	-29	0	-36	15	-24	2	10	3	-13	0	-36	-36	7	-36	-9	-8	-3	-16	33	47	1	10	0	14	21	-11	-5	-1	18	34	24	30	17	-36	-36	-4	-14
-64	5	-12	8	-14	-64	-31	-29	-31	-25	-61	-12	-34	-15	-31	-31	-64	-33	-36	-15	11	16	-19	-31	-34	16	-64	-34	9	-18	-21	-64	-64	14	10	-26	-64	-26	-27
20	-22	-57	-30	-13	-53	-45	-1	24	19	-35	-59	25	-59	-3	-56	12	-28	-26	-59	19	2	18	-18	-28	21	-19	12	24	19	-25	21	-9	-38	8	16	11	-27	-2
7	2	-13	25	19	-3	5	-22	-1	21	14	-22	-22	10	10	-19	-22	-22	7	14	38	13	0	2	-22	31	6	31	3	-22	-2	0	27	-22	8	14	34	21	11
-61	-64	-60	21	-64	-14	-64	-64	6	-64	-22	-35	-64	-64	-21	-64	-64	-64	-36	-26	-61	-6	16	-64	-39	13	-64	-64	-24	-32	-37	-31	-64	-3	10	-64	-64	-31	-14
-24	33	-31	-27	-7	12	-10	0	-8	-6	-12	-26	-19	3	-16	-40	5	-24	-12	-12	-29	34	-17	-13	38	-18	5	-16	-11	-21	-3	-15	-12	-23	22	-15	-2	-5	-15
35	7	5	-24	6	27	9	0	12	14	1	0	14	-31	25	-9	-31	19	2	-31	-24	40	-6	-4	1	26	18	0	8	34	23	-5	46	37	41	7	6	7	27
-34	-26	-21	-77	-38	-42	-47	-30	-43	-27	-37	-51	-47	-42	-48	-72	-25	-43	-35	-45	-49	-47	-36	-21	-55	-77	-49	-28	-37	-77	-51	-40	1	-13	-25	-51	-28	-15	-39
0	22	-6	-6	1	5	0	12	-5	1	-9	-8	-2	9	2	-1	-3	5	-9	-3	-8	-6	-9	5	7	-1	-10	-16	1	-38	-8	-10	24	-3	-14	-9	5	-5	-5
3	26	-1	2	-26	4	4	10	-2	10	0	0	-4	6	6	-26	7	-26	-1	15	23	-3	0	-12	13	31	-26	-26	8	-4	-1	0	-1	-26	38	-3	-1	3	0
-57	-61	-57	15	-61	12	-37	-22	15	-31	-53	-61	-31	-61	-2	-55	-61	-61	-5	-61	-51	-56	-58	-61	-14	-49	-25	-61	5	-61	-24	-57	-10	-39	6	-39	-38	-44	-26
-38	0	-38	3	4	29	-26	-10	21	-6	12	-14	-8	-4	30	-35	-10	18	-12	22	25	35	-4	32	34	41	-7	24	38	-32	3	22	28	29	1	-10	-38	22	-10
-17	52	-8	-14	36	29	4	1	47	12	6	18	23	55	41	-26	-27	31	2	12	36	44	19	12	-3	41	3	13	47	-4	36	2	29	31	42	0	33	6	22
-78	-5	-12	-78	-3	-25	-55	-78	0	-2	-78	-48	-39	-51	-24	-78	-78	-5	-78	-38	1	-9	-46	-78	5	-8	-78	-1	-3	-43	-78	-78	-23	-5	-11	-78	-78	6	-1
-43	33	-29	-39	-1	-15	-26	-53	-34	-15	-20	-29	-11	-47	-16	-45	13	-25	-32	-53	-30	14	-24	-25	-14	-8	-53	-16	-17	-25	-28	-33	-53	-49	-14	-4	25	-30	-9
-28	56	-5	-21	-3	39	12	10	-28	25	-6	-28	-21	-7	-7	-14	9	3	15	-3	46	18	-2	28	-20	31	24	-8	-1	29	4	-4	-28	25	44	9	1	54	-11
-25.8889	1.33333	-26.9444	-18.2222	-13.6667	-6.16667	-21.2778	-17.4444	-3.44444	-8.77778	-20.5556	-23.1667	-18.3333	-21.5556	-7.05556	-38.6667	-24.0556	-19.4444	-17.0556	-21.7222	-0.333333	8.22222	-11.3889	-16.7778	-11.5556	5.44444	-22.5556	-13.1111	-0.611111	-19.3889	-12	-16.9444	-6.05556	-6.5	11.3889	-18.5	-17.2778	-6.44444	-9.05556
bathing	bowing	buying	clapping	climbing	cooking	crawling	crying	dancing	digging	diving	dreaming	drinking	eating	fighting	giving	hugging	jumping	kissing	knitting	laughing	listening	painting	playing	reading	riding	sewing	singing	sitting	skiing	sleeping	smelling	snoring	standing	talking	thinking	waiting	washing	writing
-54	2	19	-53	-58	-20	7	9	6	23	8	25	12	-50	-13	-43	-37	-58	-27	19	-28	-32	19	-53	-29	-58	-58	-35	-50	-23	-20	-28	-35	-58	16	1	21	-53	16
-14	12	-2	14	-62	17	0	13	29	21	9	-1	24	13	12	21	-1	0	-40	10	-15	-20	12	9	16	11	4	-26	4	-14	-2	-4	-17	11	5	16	7	6	24
-16	-27	-14	-30	-3	-30	-29	-32	-18	-36	-16	-16	-15	-19	-15	-23	-17	-15	-8	-17	44	-16	-29	-31	9	-18	-4	-14	-17	-17	-15	-13	-14	-15	-16	2	-11	-15	-26
-27	12	-20	-34	-64	-17	-64	34	-41	-6	16	-8	-33	7	30	0	-64	-64	-59	-15	-13	3	-38	12	11	19	-12	-39	-21	-43	-41	-35	-64	2	-6	-64	12	-13	7
-59	24	4	22	13	5	-55	15	11	20	-40	20	8	0	-8	28	-59	-59	-34	14	-29	5	12	-52	18	-8	15	15	27	3	21	-14	17	16	28	-19	16	-53	13
-22	-22	50	-14	-22	28	11	50	19	53	54	-2	0	43	32	53	18	51	-10	54	42	22	56	-15	5	43	1	63	25	24	50	56	11	59	42	56	3	-22	-22
-42	-64	-4	-43	-64	-64	-43	12	-40	-64	-18	-18	8	-58	-64	1	-16	-37	-44	11	-38	13	14	-41	8	-64	-48	12	16	-26	32	-13	-21	11	-40	-32	-9	-51	12
-18	-40	2	40	-16	37	-40	17	-40	-40	7	22	40	-32	19	-40	26	-3	-40	19	7	-2	27	41	-14	35	22	-16	34	3	33	-20	0	18	18	5	-13	39	40
-12	-11	-12	-6	12	-13	-5	25	-11	-7	-11	-11	-13	-11	-12	-9	-6	8	-31	-4	19	-7	4	-5	-11	-10	-5	-10	-12	8	-12	-4	13	-8	-9	-8	-6	-11	19
-41	-36	-3	-6	-39	-7	-38	-5	-49	-37	-39	-3	-47	-67	-49	-8	-18	-77	-52	-38	-48	-48	-16	-68	-42	-41	-10	-38	-30	-43	-32	-50	-49	-47	-15	-30	-41	-72	-41
41	46	-9	0	6	42	6	40	24	19	15	39	10	37	32	37	7	20	-9	43	-9	38	38	-3	1	-2	-2	7	37	1	-13	-17	11	30	39	35	34	39	-7
-7	-18	48	27	-26	-26	16	45	-2	-18	-3	-8	2	-14	8	-3	21	-26	-1	-2	6	3	13	-3	-6	-26	-13	-5	-5	2	44	-3	27	2	55	1	49	-26	2
-61	-61	19	19	-61	-52	23	18	-61	23	-29	-52	-20	-54	21	22	0	-61	-61	26	28	8	15	14	8	-61	-34	17	15	-17	9	-37	11	-61	14	14	-61	-23	1
-21	-13	-13	-12	-6	-14	-14	30	-14	34	-16	-17	-15	-17	-18	-15	-8	5	-17	-2	-3	-19	-34	-17	-18	2	-15	-14	-12	-10	-4	-18	-4	-15	16	2	-15	-16	-1
4	37	-5	-6	-8	21	-20	5	-9	-9	-1	-3	-9	-17	39	-12	5	-1	-29	-8	-9	0	-10	-7	-1	-4	-5	-9	-2	2	-9	-10	2	17	24	-10	40	12	-7
-78	-6	-5	-78	-78	-15	5	2	-7	0	-54	1	5	-30	-78	-78	-78	-78	-78	-5	-48	-3	10	-78	-55	2	-54	-2	-51	-10	0	-2	-8	-1	5	-42	11	-78	-3
-29	22	-25	-32	-10	-32	-45	29	-47	21	-29	16	-53	-36	27	-33	-14	-18	-29	-33	-28	-14	-14	13	-23	12	-33	-22	-19	-20	17	-30	-21	16	24	16	22	23	-14
39	47	-22	37	-6	43	5	41	9	46	51	24	35	-8	43	-12	41	23	-5	44	28	1	30	32	33	18	42	-24	6	17	37	-4	15	48	31	37	43	0	41
-23.1667	-5.33333	0.444444	-8.61111	-27.3333	-5.38889	-15.5556	19.3333	-13.3889	2.38889	-5.33333	0.444444	-3.38889	-17.3889	0.333333	-6.33333	-11.1111	-21.6667	-31.8889	6.44444	-5.22222	-3.77778	6.05556	-14	-5	-8.33333	-11.6111	-7.77778	-3.05556	-9.05556	5.27778	-13.6667	-7	1.38889	12.8333	-1.11111	5.66667	-17.4444	3
bathing	bowing	buying	clapping	climbing	cooking	crawling	crying	dancing	digging	diving	dreaming	drinking	eating	fighting	giving	hugging	jumping	kissing	knitting	laughing	listening	painting	playing	reading	riding	sewing	singing	sitting	skiing	sleeping	smelling	snoring	standing	talking	thinking	waiting	washing	writing
0.5	14.25	11.5	12.5	-3	14.25	7.5	-13	8.5	3.5	4.25	-10.5	19.5	5.25	0.75	2	17.5	3.75	0.75	17.75	9.75	17.5	9	22.25	15.25	-13.5	8	5	16.75	1.25	-7.25	5.5	-11.75	15.5	22.75	7	14.25	17.25	7.75
9	-8.5	17.25	13.25	1.25	4	9.25	-1.75	-0.25	-2.75	3.75	2	15.75	-11.75	-0.5	0	9.25	-19.25	5.25	15.5	10.25	12.5	12.75	17.75	9.5	-6.25	14.75	12.5	19.5	-1.75	-6.25	10.25	0.5	-6.75	17.5	5	11.25	8.75	4.75
-13.25	-8	-10.75	-10.25	-12.5	-13	-3.75	-11.75	-14	-13.25	0	-16.75	-6.75	-14.25	-13.75	-14.75	-14.5	-12.25	-14.75	-10.5	-13.5	-10.25	-2.75	-6.25	-7.75	-13.75	-8.5	-10.5	-4	-2.5	-15.25	-13.25	-17	-10.75	-4.5	-8	-7.5	-1	-8.5
6.25	0	-6.5	9.5	0	0	8	-1	5.5	0	0	-1	15	13.5	-1.75	0	-4	-0.5	-1.25	14.25	9.5	17.25	-7.75	13	9.25	-9.75	17.5	8.25	10.25	0.75	-14.25	16	2	-5.25	17.5	14.5	5.25	-14	0
11	13.75	-4	9.5	12.5	19	11.75	3.5	11.25	5.25	2.5	4.75	20.25	10.25	9.75	20.75	0	-9	11.75	17.75	17	14.5	14.75	17.75	19.5	-2	19	9.75	22.25	-3.5	4.25	-5.5	3.25	5.25	20.25	16.25	14	10.25	20.75
14.25	22.75	28.5	28	26.25	20	16.75	6.75	14.75	12	13	5	24.25	14.75	22.25	0	0	8.25	14	23.75	21	31.25	24	27.75	31.5	0.75	16.75	27.25	27.5	10.75	13.5	15.5	16.25	20.5	32.75	29.75	25.75	25.75	16.5
3.25	0	-3	9.75	-7.25	6	8.25	-16.25	1.25	-2	0	5.5	11.75	5	-2.25	0	0	-1	6	9.5	3.75	12	-2	13.5	16	-15.75	8.75	-7.75	11.25	0	1.25	0.25	-9	-6.5	12	6	7.5	-1.25	7.5
11.75	19.5	0	0	14	27.25	12	9	16.75	16	17.5	25.25	25.25	18.5	8	0	14.5	6	18	27	10	30.75	25.75	22.75	24	-5	25.5	21.75	26.75	12.5	6.25	9	23.75	19.5	31.25	27.5	28.5	1.75	0
18	19	10.25	19	10.75	23.5	14.75	7.75	13.5	8.25	11	16.25	26.75	22	10.25	0	19.25	6.25	15.5	27.25	10.5	19	20.25	23.75	17.75	1	14.25	5.75	30.25	10	18	8.25	15.25	26.25	24.5	13	16	21.5	8.75
-11.75	0	-19.5	2	-4.75	0.75	-0.75	-31.5	-6.5	-17	0	-32.75	-3.5	-16.5	-10.25	0	0	-19.5	-14.75	7.25	-0.75	-5.25	1.75	1.5	7	-33.5	6.5	-5	1.5	-16.5	-12.25	-18.5	-16.25	0	4.75	-6.75	0.5	-8.5	-3.25
0.5	0	0	1	2.25	2.75	0.75	-3.75	4.25	2.75	2.25	-4.5	11	-8	0.25	0	0	-4.75	-2	2	0.25	5	-1.5	11	12	-7.5	5.25	-5.5	23.5	2.25	7	-0.75	-1.75	5.5	10	7	9.25	10	-5.5
-0.5	0	0	6.5	1.75	9	4.25	1	-1	3.75	0	-2.75	29.25	9.75	20	0	25.5	-1.5	0.5	16.5	18	34.5	19.25	14	23	-4.5	14.5	17.25	30.25	4	13.75	5.75	8.25	4.75	39	10.25	10.5	12	7.75
1.75	7	0	3	-6.25	9.75	8	-7	0	-1	-8.25	-6.75	8	5.25	-1	0	-3.5	-21.5	0.75	15.5	13.5	8	7.75	5.75	10.5	-18.75	17.25	2.25	-3.5	-11	6.75	-11.25	-2	0	9.5	9.25	6.25	10.75	10.25
8	10.5	0	22.25	23	9.5	15.5	2.75	7.5	7.5	8.5	3.25	19.75	20.25	16.5	6.5	14.25	8.5	10.75	23.5	12.25	20.5	10	22.5	24	-2.25	22	22.75	25.5	11.25	6.5	6.25	14.75	18	21.5	20.75	11	10.5	16
0	1	7	30.75	8	14.5	14.25	1.5	-0.75	0	-4.75	-9.75	21	21.25	1	-1.5	1.75	-3.25	-0.75	23.25	20.5	24.5	12.75	23.25	15.25	-4	13.25	14.5	15.5	16.75	2.75	5.25	6.75	11.25	29.5	7.25	9.75	11.75	12.5
1.25	0	0	0	-3.75	-2.25	3.5	0.75	-0.25	0.25	0	-11.75	-0.25	3.25	-9	2	-4.25	0	-8.25	3.25	8.75	7.75	-7.25	0	0	-17.5	4.75	-0.5	1.5	0	0	-1	2.25	-2.5	6.25	0	6	5	0
-2.5	0	10	16.25	15.5	14.25	2.5	5	0.75	5	0	-3.5	19.5	12	4.5	10.25	0	3.5	-5.5	14	14.75	12	15	8.25	11.75	-5	10.5	23.75	9.25	-4.5	1.5	-1.5	2.75	-3	17.75	0	9	13	0
-3.5	1.75	10.5	0	4.25	10.75	6.75	4.75	-2	4.25	-1.25	-6.25	12.25	3.25	0.5	0	8.75	16.5	-1.75	15.75	26.5	16.5	5.75	16.5	13.25	-5	9.75	16.75	20	1.75	8.75	1.75	2	13.5	17	13.5	9.5	12	4.75
0	0	0	0	0	0	0	0	0	0	0	0	0	0	0	0	0	0	0	0	0	0	0	0	0	0	0	0	0	0	0	0	0	0	0	0	0	0	0
3	5.16667	2.84722	9.61111	4.55556	9.44444	7.73611	-2.40278	3.29167	1.80556	2.69444	-2.45833	14.9306	6.31944	3.06944	1.40278	4.69444	-2.20833	1.90278	14.625	10.6667	14.8889	8.75	14.1667	13.9861	-9.01389	12.2083	8.79167	15.7778	1.75	1.94444	1.77778	2.22222	5.84722	18.2917	9.56944	10.375	8.08333	5.55556
