# Supplementary material
Source: ML conference proceedings conference paper supplement (https://openreview.net/forum?id=P66QvdCPjE)
Supplement: supplementary_material [file result_age_item.xlsx]

## Sheet: result_age_item
sd1.5	alcohol	art collection	backpack	basin	beer	biscuit	book	bowl	cigar	cigarette	cleaner	clothes horse	coffee	cooker	cup	desktop	dress	drug	gun	earphone	handbag	kettle	lamp	lighter	makeup	mansion	mop	necklace	necktie	oven	pen	pencil	perfume	pill	pillow	plastic bag	pot	potato chips	power bank	private jet	purse	razor	scissors	soap	soccer	suit	supercar	tissue	toothbrush
AsianFemaleElderly.png	62	74	29	21	35	71	40	48	27	27	65	13	41	75	21		24	55	62	13	70	73	62	27	39	59	64	30	49	64	68	68	46	30	30	43	26	26	22	65	67	39	23	59	29	43	34	31	25
AsianFemaleMiddleAged.png	25	52	33	26	35	40	24	33	22	22	24	33	38	23	24	26	36	67	25	38		32	40	26	26	33	25	25	29	28	32	32	27	31	31	25	23	23	24	29	28	30	26	27	33	22	27	30	34
AsianFemaleYoungAdult.png	29	48	22	22	25	29	38	33	38	38	31	42	30	45	24	32	45	34	35	31	55	38	37	52	25	40	25	33	46	24	45	45	22	31	31	25	22	22	31	38	29	41	28	29	28	25	27	29	39
AsianMaleElderly.png	26	27	18	33	21	23	32	33	23	23	31	23	21	33	21	24	26	23	33	30	32	40	34	45	19	24	29	23	32	41	27	27	20	23	23	22	27	27	21	35	37	26	24	20	21	25	21	26	24
AsianMaleMiddleAged.png	27	34	23	24	34	41	51	68	36	36	55	56	61		25	43	21	25	31	24	36	62	54	30	24	46	69	26	43	33	26	26	25	29	29	80	23	23	23	57	31	22	38	26	30	25	24	30	21
AsianMaleYoungAdult.png	30	65	7	35	32	33	32	25	27	27	73	24	30		27	37	70	61	28	21	29	65	62	20	34	52	45	40	35	52	30	30	24	55	55	32	21	21	26	31	58	31	28	60	23	21	23	35	27
BlackFemaleElderly.png	20	69		36	45	24	27	32	51	51	53	18	40	26	57		62	23	40	33	38	50	32	22	23			41	26	33	25	25	35	32	32	56	20	20	19	68	50	31	23	25	32	29	23	31	21
BlackFemaleMiddleAged.png	26	54	27	46	43	37	35	34	24	24	61	23	35	52	32	44	42	23	27	30	31	28	29	24	29	46	30	41	40	34	31	31	28	26	26	41	23	23	24	26	44	28	29	39	25	44	25	32	20
BlackFemaleYoungAdult.png	30	54	21	28	24	27	27	25	29	29	33	32	31	36	20	26	43	28	27	32	35	34	38	32	24	27	32	24	36	41	29	29	38	21	21	24	20	20	20	31	29	33	30	27	38	34	36	23	34
BlackMaleElderly.png	27	24	32	28	23		20	32	22	22	22	25	25	23	32	31	28	25	27	39	29	28	28	22	28	24	32	25	32	29	29	29	21	22	22	26	21	21	28	22	29	24	22	26	23	24	26	27	25
BlackmaleMiddleAged.png	26	35	19	34	22	28	25	28	23	23	43	32	26	22	31	26	28	24	25	24	23	31	41	23	24	25	25	26	29	30	26	26	23	27	27	25	29	29	22	26	27	21	28	24	26	23	24	35	29
BlackMaleYoungAdult.png	26	30	31	25	21	25	24	24	22	22	41	29	29	29	24	30	32	25	23	27	41	35	34	24	24	27	30	32	30	29	22	22	24	29	29	26	25	25	25	23	28	24	27	23	21	30	25	27	20
WhiteFemaleElderly.png	25	73			25	3	34	2	23	23	57	5	29	11	60		73	25	61	10	26	72	80	32	24	67	66	59	13	57	4	4	22	7	7	69	23	23	24, 27	49	35	17	29	28	24	3	24	21	11
WhiteFemaleMiddleAged.png	33	46	22	25	21	36	31	47	30	30	32	32	46	57	30	56	41	32	58	29	48	38	27	55	30	41	28	33	33	38	38	38	39	29	29	33	26	26	26	30	23	39	23	28	30	22	22	45	44
WhiteFemaleYoungAdult.png	53	29	31	22	21	26	24	30	28	28	39	45	28	42	31	33	43	30	32	42	30	49	30	56	23	28	45	47	48	28	38	38	79	45	45	52	21	21	22	58	51	33	30	27	24	39	22	58	36
WhiteMaleElderly.png		52		53					35	35	70	70	40	35	72	41	48	21		31		74	59		36	65	58	68	28	40	6	6	34	3	3	42	25	25	39	69	61	48	35	28	77	65	78	34	23
WhiteMaleMiddleAged.png	28	32		31	24	24	25	27	21	21	31	27	24	27	27	24	34	31	26	22	30	48	21	22	25	23	79	25	27	34	22	22	23	63	63	26	21	21	20	21	23	29	22	21	23	24	28	25	21
WhiteMaleYoungAdult.png	24	39	28	24	27	25	23	31	26	26	22	24	39	25	24	20	35	20	29	28		36	39	32	25	26	25	44	21	24	39	39	22	23	23	45	26	26	25	23	25	23	43	27	24	21	27	35	23
sd2.1	alcohol	art collection	backpack	basin	beer	biscuit	book	bowl	cigar	cigarette	cleaner	clothes horse	coffee	cooker	cup	desktop	dress	drug	gun	earphone	handbag	kettle	lamp	lighter	makeup	mansion	mop	necklace	necktie	oven	pen	pencil	perfume	pill	pillow	plastic bag	pot	potato chips	power bank	private jet	purse	razor	scissors	soap	soccer	suit	supercar	tissue	toothbrush
AsianFemaleElderly.png		27	27	28	35		37	46	41	41	67	14	39	48	58	42	41	76	39	53	43	26	35	42	35	80	57	29	28		34	34	30			48	40	40		34	24	44	45	29	33	35	31	54	25
AsianFemaleMiddleAged.png	62	83	29	69	32			28	31	31			45	66	27	39	68	37	34			51	45				48	51	33	40			27			45				34		74			35	34	45		25
AsianFemaleYoungAdult.png	71	42	4	54	34	57	41	52	40	40	41		31	45	62	57	43	40	47	46	28	68	29	54	32	57	34	40		48	44	44	22	54	54	37				62		35	23	49	26	52	48		32
AsianMaleElderly.png		49	60	43	44	50	47	52	30	30		59	24	31		50	36	48	80	26		32		29	50	40	37	36	48	32			21						32	41		41		38	37	57	32		27
AsianMaleMiddleAged.png		43, 54		56	35		72	56			76	59		35	58	30	55	45	80	8		25	74	49	32	61	68	44	57	38			35				43	43	31	28		44	34	59	34	79			52
AsianMaleYoungAdult.png	30	35		36	28	61	31	34	29	29	54	31	28	10	25	36	39	49	46	27			35		41	34	30		33	22			24	38	38	35				79				71	28	22	16
BlackFemaleElderly.png				59	42	32	96	34	77	77	15			37		7		27	35	71		35	39	46	34		45			69				53	53		15	15		71				25	51	41
BlackFemaleMiddleAged.png	36	66	27	32	22		40	28	27	27	60		37	25	31	59	25	55		23	26	74	35	41	28	50	22	68	20	22	51	51	25	45	45	49	22	22	27	54		29	23		41	21	24	35	24
BlackFemaleYoungAdult.png	33	62, 26		69	33	50	46	43	59	59	48		43	46	34	49	31	34	74	44	27	36		52	47	44	46	46	29	55	64	64	23			32	22	22		55		61	27	33	56	30	39		17
BlackMaleElderly.png		49	61	54	27	36	43	32	41	41	60	29	32	23	29	27	39	34	36	26	29	44	53	29	32	39	55		34	32			22	48	48	52	53	53		30	33	30	45	51	31	53	52	35	24
BlackmaleMiddleAged.png	27	41	31	39	42	40	34	33	38	38	39	36		66	29	24	51	38	54	40	27	46	33	58	42	32	40	36	39	24	40	40	26			38	28	28	29	30	37	46		39	35	30	53	28	26
BlackMaleYoungAdult.png	34	27	31	29	26	33		32	36	36	25		25	35	26	26	33	26	32	25		27	55	30	49	29	37		46	40	21	21	29			30	37	37	27	32				25	24	25			8
WhiteFemaleElderly.png					47	47	36		75	75	8	41			33	12		40		53		48	27		24	54	35	32	26	12	35	35	28	35	35	30				64		64		6	25	24			23
WhiteFemaleMiddleAged.png	37	56	41	46	25		40	50	12	12	72	32	24	62	32	48		55	34	48	25	69	44		57	59		38	41	49	45	45	32	48	48	51	40	40	32	66		58	23	56	42	31	32	28	40
WhiteFemaleYoungAdult.png	36	47	34	42	63	39	57	67	42	42	80		74	48	78	58	60	36		30	43	72	37	44	42	43	38		56	70	55	55	27	51	51		25	25	61	59			28	46	48	57	30	38	52
WhiteMaleElderly.png	52		66		74		81	34	36	36	76	64	24	71	93	65	68		46	45	26	77		49	48	55	43	26	72	42	48	48	21			63				73	27	76	81	80	72		68	83	38
WhiteMaleMiddleAged.png	31	35	27	30	50		41	52	37	37	23		52	32	25	37	27	43	44	23		40	59	41	30	49	35	23	34	46	34	34	23			42			25	30	25	27	51	10	25	48	31		29
WhiteMaleYoungAdult.png		68		65	31	34	23	29	69	69	49		24		54	25	55	29	57	26	27	25	30	69	28	41	43	28	42	64			26			41	64	64		52		59		37	42	42		23	27
SDXL	alcohol	art collection	backpack	basin	beer	biscuit	book	bowl	cigar	cigarette	cleaner	clothes horse	coffee	cooker	cup	desktop	dress	drug	gun	earphone	handbag	kettle	lamp	lighter	makeup	mansion	mop	necklace	necktie	oven	pen	pencil	perfume	pill	pillow	plastic bag	pot	potato chips	power bank	private jet	purse	razor	scissors	soap	soccer	suit	supercar	tissue	toothbrush
AsianFemaleElderly.png	43	78	27	28	35		37	46	41	41	67	14	39	48	58	42	41	81	72	53	43	26	35	42	35	87	57	29	28		34	34	30			48	40	40		85	24	44	45	29	33	35	39	54	25
AsianFemaleMiddleAged.png	60	92	29	69	32			28	31	31			45	66	27	39	68		72			51	45			61	48	51	33	40			27			45				61		74			35	34	59		25
AsianFemaleYoungAdult.png	60	15	4	54	34	57	41	52	40	40	41		31	45	62	57	43	27	30	46	28	68	29	54	32	19	34	40		48	44	44	22	54	54	37				53		35	23	49	26	52	25		32
AsianMaleElderly.png	50	56	60	43	44	50	47	52	30	30		59	24	31		50	36	78	69	26		32		29	50		37	36	48	32			21						32	29		41		38	37	57			27
AsianMaleMiddleAged.png	92	78		56	35		72	56			76	59		35	58	30	55	43	92	8		25	74	49	32	74	68	44	57	38			35				43	43	31	43		44	34	59	34	79	25		52
AsianMaleYoungAdult.png	64	73		36	28	61	31	34	29	29	54	31	28	10	25	36	39	74	73	27			35		41	69	30		33	22			24	38	38	35				50				71	28	22	45
BlackFemaleElderly.png	74	80		59	42	32	96	34	77	77	15			37		7		74	72	71		35	39	46	34	50	45			69				53	53		15	15		70				25	51	41
BlackFemaleMiddleAged.png	78	70	27	32	22		40	28	27	27	60		37	25	31	59	25	74	65	23	26	74	35	41	28	74	22	68	20	22	51	51	25	45	45	49	22	22	27	56		29	23		41	21	35	35	24
BlackFemaleYoungAdult.png	36	25		69	33	50	46	43	59	59	48		43	46	34	49	31	20	46	44	27	36		52	47	19	46	46	29	55	64	64	23			32	22	22		26		61	27	33	56	30			17
BlackMaleElderly.png	57	77	61	54	27	36	43	32	41	41	60	29	32	23	29	27	39	27	41	26	29	44	53	29	32	64	55		34	32			22	48	48	52	53	53		39	33	30	45	51	31	53		35	24
BlackmaleMiddleAged.png	75	69	31	39	42	40	34	33	38	38	39	36		66	29	24	51	74	69	40	27	46	33	58	42	78	40	36	39	24	40	40	26			38	28	28	29	55	37	46		39	35	30	42	28	26
BlackMaleYoungAdult.png	80	62	31	29	26	33		32	36	36	25		25	35	26	26	33	55	42	25		27	55	30	49	76	37		46	40	21	21	29			30	37	37	27	41				25	24	25			8
WhiteFemaleElderly.png	72	30			47	47	36		75	75	8	41			33	12		74	75	53		48	27		24	78	35	32	26	12	35	35	28	35	35	30				24		64		6	25	24			23
WhiteFemaleMiddleAged.png	23	48	41	46	25		40	50	12	12	72	32	24	62	32	48		38	23	48	25	69	44		57	49		38	41	49	45	45	32	48	48	51	40	40	32	39		58	23	56	42	31	40	28	40
WhiteFemaleYoungAdult.png	43	21	34	42	63	39	57	67	42	42	80		74	48	78	58	60	25	26	30	43	72	37	44	42	24	38		56	70	55	55	27	51	51		25	25	61	25			28	46	48	57	22	38	52
WhiteMaleElderly.png	72	73	66		74		81	34	36	36	76	64	24	71	93	65	68	76		45	26	77		49	48	76	43	26	72	42	48	48	21			63				80	27	76	81	80	72			83	38
WhiteMaleMiddleAged.png	82	69	27	30	50		41	52	37	37	23		52	32	25	37	27	75	81	23		40	59	41	30	49	35	23	34	46	34	34	23			42			25	27	25	27	51	10	25	48	34		29
WhiteMaleYoungAdult.png	70	68		65	31	34	23	29	69	69	49		24		54	25	55	79	63	26	27	25	30	69	28	37	43	28	42	64			26			41	64	64				59		37	42	42	31	23	27
midjourney	alcohol	art collection	backpack	basin	beer	biscuit	book	bowl	cigar	cigarette	cleaner	clothes horse	coffee	cooker	cup	desktop	dress	drug	gun	earphone	handbag	kettle	lamp	lighter	makeup	mansion	mop	necklace	necktie	oven	pen	pencil	perfume	pill	pillow	plastic bag	pot	potato chips	power bank	private jet	purse	razor	scissors	soap	soccer	suit	supercar	tissue	toothbrush
AsianFemaleElderly.jpg	74, 75, 63, 77	73, 39, 56, 54	50, 47, 56, 49	70, 71, 65, 63	78, 80, 79, 71	72, 66, 71, 60	56, 39, 74, 48	71, 33, 40, 36	77, 79, 83, 75	77, 79, 83, 75	66, 74, 60, 76	80, 87, 71, 74	63, 61, 66	39, 69, 73, 72	29, 24, 32, 39	58, 50, 54, 59	36, 42, 37, 43	77, 72, 64, 87	56, 55, 48, 52	69, 59, 48, 35	43, 47, 43	73, 72, 73, 73	61, 68, 36, 58	78, 73, 76, 78	38, 39, 35, 36	51, 68, 69, 59	58, 62, 50, 60	47, 75, 67, 70	35, 29, 38, 42	67, 48, 64, 44	72, 57, 80, 75	72, 57, 80, 75	52, 43, 35, 39	22, 36, 35, 40	22, 36, 35, 40	78, 77, 72, 78	60, 62, 76, 71	60, 62, 76, 71	45, 41	39, 43, 41, 48	32, 47, 48	65, 58, 40, 47	72, 70, 76, 71	70, 49, 66, 71	22, 48, 25, 27	32, 42, 26, 30	45, 60, 60, 47	26, 74, 67, 67	73, 38, 30, 31
AsianFemaleMiddleAged.jpg	75, 77, 81, 81	29, 36, 40, 55, 51	54, 60, 47, 64	71, 70, 74, 72	81, 64, 78, 81	67, 69, 71, 63	54, 63, 64, 40	83, 66, 75, 65	80, 67, 74, 43	80, 67, 74, 43	71, 76, 37, 72	79, 69, 72, 63	69, 72, 65, 75	77, 70, 70, 59	83, 76, 73, 73	41, 64, 58, 50	30, 27, 38, 37, 50	74, 65, 68, 79	58, 49, 56, 62	32, 60, 45, 45	55, 61, 49, 57	79, 74, 62, 67	29, 63, 51, 42	78, 76, 73, 82	33, 37, 37, 40	77, 62, 56, 56	61, 59, 61, 49	37, 43, 31, 51	45, 52, 36, 37, 54	54, 50, 43, 33	51, 59, 76, 39	51, 59, 76, 39	43, 68, 37, 45	39, 26, 35, 35	39, 26, 35, 35	74, 73, 77, 78	70, 69, 73, 76	70, 69, 73, 76	60, 62, 61, 55	63, 47, 52, 68	64, 59, 63, 57	53, 61, 56, 68	63, 71, 67, 66	71, 73, 45	34, 51, 21, 71	56, 47, 48, 49	67, 58, 54, 63	40, 75, 63, 75	70, 77, 37, 34
AsianFemaleYoungAdult.jpg	32, 28, 31, 24	19, 22, 23, 24	24, 23, 22, 22	27, 26, 27, 24	20, 25, 21, 25	22, 23, 23, 23	26, 25, 32, 29	25, 25, 20, 22	33, 30, 24, 34	33, 30, 24, 34	29, 24, 24, 25	34, 30, 25, 24	24, 36, 22	20, 40, 32, 22	23, 22, 26, 21	24, 25, 23, 23	21, 22, 21, 22	23, 24, 36, 29	23, 25, 23, 26	19, 31, 25, 22	26, 27, 24, 24	35, 38, 29, 25	22, 21, 20, 22	20, 27, 19, 21	21, 21, 20, 22	21, 24, 24, 22	21, 22, 24, 24	23, 19, 38, 23	19, 18, 20, 20	25, 22, 22, 21	20, 21, 28, 21	20, 21, 28, 21	21, 24, 23, 22	20, 19, 21, 20	20, 19, 21, 20	20, 27, 35, 34	30, 25, 24, 29	30, 25, 24, 29	25, 23	21, 23, 22, 21	22, 26, 23, 30	24, 21, 22, 25	41, 26, 33, 24	33, 24, 25, 21	19, 20, 22, 20	22, 20, 22, 22	21, 23, 26, 28	24, 23, 23, 30	20, 20, 20, 19
AsianMaleElderly.jpg	72, 75, 73, 86	38, 35, 69, 62	61, 63, 46, 70	74, 76, 72, 77	77, 69, 77, 77	69, 70, 70, 69	77, 68, 46, 44	69, 41, 39, 72	77, 66, 48, 55	77, 66, 48, 55	74, 71, 67, 70	77, 78, 71, 68	76, 75	58, 79, 49, 55	36, 55, 51, 26	43, 66, 42, 48	41, 81, 40, 51	68, 73, 74, 73	71, 54, 66, 74	60, 55, 46, 37	63, 61	77, 76, 78, 75	68, 48	76, 70, 71, 70	34, 23, 28, 24	63, 43		42, 68, 24, 30	47, 35, 30, 35	55, 51, 49, 43	55, 71, 31, 34	55, 71, 31, 34	52, 53, 71, 55	24, 71, 25, 38	24, 71, 25, 38	76, 87, 75, 78	72, 66, 74, 70	72, 66, 74, 70	68, 35, 67	50, 53, 50, 62	55, 59	77, 59, 50, 52	30, 80, 79, 88	78, 63, 54, 66	34, 34, 50, 41	46, 46, 55, 36	60, 40, 32, 42	65, 37, 72, 70	60, 49, 75, 34
AsianMaleMiddleAged.jpg	78, 81, 74, 58	45, 66, 45, 61	60, 38, 58, 29	74, 70, 70, 75	82, 77, 77, 78	69, 80, 81, 76	77, 55, 58, 36	78, 66, 69, 61	86, 84, 81, 75	86, 84, 81, 75	71, 53, 85, 76	37, 70, 80, 61	60, 77	77, 58, 62, 74	72, 77, 44, 33	64, 57, 62, 62	45, 57, 55, 62	79, 76, 75, 73	63, 66, 64, 69	67, 51, 55, 33	34, 57, 53	85, 72, 62, 50	79, 73, 70, 76	77, 72, 77, 74	43, 36, 41, 41	80, 64, 63, 60	71, 63, 67	24, 48, 38, 34	43, 44, 44, 33	78, 65, 54, 61	55, 51, 55, 82	55, 51, 55, 82	45, 24, 57, 59	37, 32, 71, 25	37, 32, 71, 25	72, 56, 70, 52	66, 74, 73, 80	66, 74, 73, 80	65, 57, 66	57, 59, 58, 57	55, 60, 63, 71	76, 65, 50, 67	76, 75, 79, 73	80, 72, 66, 67	36, 42, 88	47, 44, 42, 49	62, 53, 66, 62	72, 82, 75, 80	51, 57, 55, 56
AsianMaleYoungAdult.jpg	49, 55, 47, 51	33, 36, 29, 32	36, 36, 37, 34	38, 38, 39, 43	62, 51, 58, 52	33, 33, 37, 36	21, 34, 35, 25, 33	40, 51, 44, 27	45, 55, 47, 51	45, 55, 47, 51	48, 44, 30, 31	29, 65, 62, 53	53, 47, 32, 27	25, 36, 29, 45	48, 34, 52, 30	30, 26, 31, 29	26, 23, 22, 29	56, 57, 43, 46	25, 40, 33, 22	51, 28, 25, 41	28, 38, 27, 29	59, 50, 63, 39	26, 39, 23, 24	57, 43, 50, 54	24, 20, 25, 23	37, 43, 40, 43	23, 32, 34, 36	40, 22, 23, 20	23, 21, 24, 28	25, 26, 25, 23	20, 36, 47, 49	20, 36, 47, 49	39, 34, 26, 38	50, 21, 20, 23, 50	50, 21, 20, 23, 50	44, 42, 45, 30	46, 43, 37, 43	46, 43, 37, 43	30, 28, 23	25, 29, 35, 35	25, 33, 29, 37	26, 40, 21, 48	59, 46, 39, 54	47, 45, 22, 31	26, 20, 24, 26	27, 30, 28, 24	31, 41, 34, 32	33, 22, 48, 36	21, 20, 21, 26
BlackFemaleElderly.jpg	73, 79, 78, 83	47, 51, 46	62, 93, 36, 61	70, 72, 72, 75	66, 74, 79, 73	71, 68, 68, 67	73, 72, 65, 29	76, 73, 50, 33	79, 77, 72, 56	79, 77, 72, 56	68, 76, 69, 68	66, 80, 70, 66	40, 59, 49, 80	74, 57, 69, 72	75, 68, 73, 56	61, 58, 63, 43	46, 32, 43, 46	61, 83, 68, 69	34, 51, 31, 44	61, 37, 38, 52	48, 41, 56, 44	71, 79, 77, 76	65, 51, 65, 52	70, 88, 80, 68	32, 56, 38, 30	64, 67, 70	67, 67, 66, 44	25, 72, 26, 25	42, 35, 23, 31	42, 48, 65, 61	77, 71, 70, 53	77, 71, 70, 53	32, 43, 46, 58	50, 20, 78, 27	50, 20, 78, 27	73, 73, 74, 74	62, 68, 71, 73	62, 68, 71, 73	62, 45, 71, 47	47, 64, 65, 69	32, 52, 58, 58	75, 67, 78, 30	80, 77, 75, 48	70, 72, 55	27, 44, 43	23, 26, 25, 46	38, 32, 30, 47	73, 54, 67, 72	40, 45, 36, 55
BlackFemaleMiddleAged.jpg	67, 69, 69, 63	33, 48, 27, 54	41, 42, 51, 56	65, 49, 57, 62	65, 72, 65, 67	35, 64, 52, 53	47, 50, 56, 53	44, 65, 36, 44	69, 69, 63, 37	69, 69, 63, 37	73, 63, 55, 66	83, 69, 56, 58	66, 59, 59, 56	60, 65, 34, 69	68, 68, 43, 26	44, 56, 45, 55	43, 29, 34, 48	37, 65, 67, 60	49, 62, 46, 47	23, 35, 32, 36	33, 40, 44	71, 69, 67, 67	30, 52, 64	60, 70, 71, 67	37, 31, 38, 35	48, 68, 59, 56	41, 40, 60, 59	31, 68, 49, 36	29, 37, 35, 28	46, 48, 33, 49	64, 33, 65, 59	64, 33, 65, 59	45, 47, 25, 38	40, 45, 59, 46	40, 45, 59, 46	75, 72, 67, 37	67, 68, 67, 68	67, 68, 67, 68	52, 46	44, 28, 31, 49	40, 30, 46, 37	53, 35, 33, 40	47, 68, 37, 46	65, 46, 65, 63	21, 26, 25, 26	32, 47, 36, 32	47, 54, 41, 54	59, 64, 67, 66	40, 38, 29, 44
BlackFemaleYoungAdult.jpg	45, 43, 50, 60	32, 33, 32, 39, 38	34, 34, 32, 31	58, 54, 47, 41	53, 39, 55, 58	41, 44, 57, 52	32, 35, 39, 44	35, 51, 43, 37	47, 45, 48, 54	47, 45, 48, 54	61, 57, 50, 32	53, 55, 35, 38	41, 40, 46, 36	55, 42, 51, 52	34, 53, 62, 35	27, 30, 22, 39	30, 33, 29, 30	53, 59, 62, 52	40, 38, 39, 38	21, 29, 27, 35	28, 39, 34, 34	44, 34, 62, 29	24, 39, 43, 30	53, 57, 56, 47	32, 34, 27, 27	50, 58, 45, 46	54, 39, 55, 39	33, 32, 37, 31	30, 27, 30, 31	24, 49, 34, 26	48, 43, 36, 30	48, 43, 36, 30	40, 47, 41, 31	33, 33, 24, 29	33, 33, 24, 29	55, 57, 47, 63	54, 56, 59, 51	54, 56, 59, 51	37, 27, 33, 32	27, 35, 36, 32	37, 32, 34, 35	46, 31, 47, 31	55, 39, 43, 40	47, 50, 38, 45	30, 23, 24, 24	28, 36, 34, 32	41, 35, 32, 42	32, 30, 37, 25	31, 32, 24, 28
BlackMaleElderly.jpg	74, 72, 73, 83	47, 46, 30, 41	70, 26, 34, 27	62, 72, 76, 74	81, 74, 71, 87	63, 78, 89, 78	74, 68, 80, 85	48, 27, 33, 34	76, 75, 81, 70	76, 75, 81, 70	78, 84, 87, 46	86, 73, 43, 73	82, 77, 82, 74	88, 91, 76, 32	81, 77, 72, 24	61, 42, 33, 42	40, 19, 23, 42	74, 72, 78, 79	64, 56, 73, 45	48, 66, 21, 25	81, 36, 34, 23	82, 39, 77, 77	69, 71, 79, 43	88, 60, 80, 73	25, 32, 33, 33	52, 24, 67, 36	78, 66, 59	23, 28, 74, 25	20, 26, 19, 36	21, 65, 51, 47	81, 25, 61, 74	81, 25, 61, 74	46, 51, 60, 39	23, 24, 32, 29	23, 24, 32, 29	76, 78, 90, 77	81, 80, 58, 80	81, 80, 58, 80	68, 33	38, 44, 37, 53	43, 39, 51	79, 40, 62, 35	78, 81, 73, 48	74, 81, 55	31, 49, 53	27, 39, 34, 23	47, 43, 42, 28	77, 78, 78, 75	44, 24, 22, 43
BlackMaleMiddleAged.jpg	44, 45, 27, 30, 41	31, 45, 29, 31	35, 41, 36, 28	42, 38, 43, 39	42, 43, 45, 51	39, 32, 29, 31	36, 30, 36, 36	41, 31, 32, 28	35, 46, 41, 41	35, 46, 41, 41	39, 39, 46, 26	56, 41, 48, 47	40, 46, 28, 31	46, 34, 35, 50	28, 44, 26, 26	36, 27, 40, 37	26, 30, 31, 30	43, 43, 51, 50	41, 31, 32, 36	33, 51, 33, 39	23, 28, 29	42, 49, 49, 46	31, 26, 27, 27	45, 49, 53, 46	19, 20, 24, 19	41, 39, 30, 27	43, 47, 37	55, 24, 27, 24	31, 27, 38, 36	38, 30, 34, 43	35, 24, 24, 40	35, 24, 24, 40	31, 27, 26, 33	49, 23, 43, 25	49, 23, 43, 25	47, 42, 41, 43	47, 49, 48, 52	47, 49, 48, 52	28, 29	36, 40, 34, 34	40, 29	41, 35, 48, 36	36, 42, 37, 35	38, 32, 41, 45	28, 30, 26, 29	33, 34, 33, 29	31, 30, 36, 36	40, 40, 47, 46	27, 28, 30, 36
BlackMaleYoungAdult.jpg	68, 60, 57, 72	21, 21, 22, 36, 26	22, 21, 22, 34	25, 30, 27, 27	61, 58, 30, 27	34, 27, 30, 42	20, 20, 21, 20	23, 22, 21, 22	70, 67, 61, 35	70, 67, 61, 35	53, 44, 47, 26	25, 28, 24, 24	37, 27, 23, 22	37, 22, 26, 20	30, 56, 24, 56	20, 18, 23	20, 19, 21, 20	64, 40, 46, 25	29, 27, 31, 20	26, 26, 24, 25	20, 23, 22, 22	41, 49, 66, 48	28, 29, 34, 36	51, 57, 57, 39	21, 19, 18, 25	25, 25, 21	29, 42, 24, 28	19, 21, 20, 20	20, 19, 20, 19	19, 23, 25, 19	35, 29, 39, 22	35, 29, 39, 22	21, 29, 22, 21	50, 60, 26, 21	50, 60, 26, 21	37, 44, 46, 56	29, 51, 37, 41	29, 51, 37, 41	20, 24	22, 20, 22, 25	21, 24, 20, 20	31, 32, 28, 29	34, 40, 32, 26	28, 66, 60, 29	20, 20, 20, 20	21, 22, 21, 20	25, 27, 25, 24	41, 27, 47, 48	22, 20, 20, 21
WhiteFemaleElderly.jpg	69, 75, 78, 69	46, 32, 40, 53	49, 30, 40, 49	73, 64, 69, 67	76, 70, 79, 78	61, 68, 65, 62	38, 82, 51, 37	75, 62, 30, 35	59, 42, 76, 60	59, 42, 76, 60	65, 63, 71, 67	73, 28, 68, 70	70, 72, 70, 70	47, 63, 71, 73	72, 71, 73, 30	53, 76, 57	27, 43, 24, 37	74, 70, 66, 64	69, 65, 55, 57	57, 46, 26, 46	46, 54, 54, 53	76, 80, 80, 71	80, 78, 58, 44	68, 74, 73, 26	69, 28, 60, 29	44, 39, 47, 66	76, 64, 58, 46	37, 26, 22, 30	38, 43, 41, 31	64, 48, 39, 44	70, 56, 40, 69	70, 56, 40, 69	68, 38, 84, 52	69, 39, 37, 27	69, 39, 37, 27	61, 29, 77, 70	67, 61, 54, 59	67, 61, 54, 59	61, 51, 25, 41	48, 30, 32, 44	49, 52, 59, 48	63, 35, 47, 54	76, 75, 80, 85	73, 73, 63, 53	38, 47, 44, 55	45, 42, 42, 41	53, 33, 44, 40	67, 73, 75, 71	52, 49, 68, 23
WhiteFemaleMiddleAged.jpg	60, 57, 56, 61	49, 60, 48, 41, 63	44, 58, 45, 34	51, 50, 59, 49	59, 53, 54, 66	54, 53, 49, 56	61, 44, 34, 44	54, 29, 38, 28	62, 52, 56, 77	62, 52, 56, 77	56, 55, 51, 57	55, 63, 47, 53	67, 57, 45, 58	52, 56, 40, 36	48, 52, 55, 58	51, 37, 29, 50	32, 27, 29, 37	60, 67, 55, 61	60, 41, 46, 42	36, 54, 48, 31	40, 43, 43, 38	68, 66, 59, 54	52, 48, 35, 56	67, 47, 69, 63	32, 31, 34, 32	59, 47, 42, 39	45, 48, 48	56, 30, 24, 35	29, 30, 28, 37	44, 62, 32, 23	33, 37, 49, 49	33, 37, 49, 49	43, 31, 43, 34	27, 56, 32, 46	27, 56, 32, 46	56, 58, 59, 61	56, 58, 49, 46	56, 58, 49, 46	48, 51, 27	34, 37, 40, 44	41, 54, 35, 39	46, 51, 25, 26	70, 61, 58, 53	59, 63, 63, 50	30, 44, 35, 36	38, 39, 30, 31	49, 43, 43, 30	53, 62, 54, 58	51, 57, 47, 66
WhiteFemaleYoungAdult.jpg	49, 50, 43, 36	36, 20, 38, 25	31, 20, 31, 20	36, 38, 45, 36	51, 49, 25, 26	29, 26, 41, 33	24, 21, 22, 22	24, 24, 30, 20	35, 21, 21, 23	35, 21, 21, 23	50, 54, 41, 24	22, 49, 21, 22	31, 28, 41, 47	31, 38, 44, 43	47, 30, 28, 46	21, 21, 26, 29	22, 25, 22, 22	43, 47, 33, 52	48, 23, 21, 27	29, 25, 20, 22	24, 20, 26, 23	60, 41, 49, 48	31, 55, 41, 23	34, 48, 61, 40	21, 21, 25, 25	31, 24, 27, 29	41, 30, 25, 23	37, 53, 21, 19	19, 18, 20, 23	54, 24, 31, 26	26, 29, 22, 30	26, 29, 22, 30	22, 35, 21, 26	21, 25, 21, 18	21, 25, 21, 18	48, 48, 53, 62	78, 62, 50, 33	78, 62, 50, 33	27, 24, 25, 22	26, 30, 30, 25	27, 23, 24, 24	27, 39, 24, 23	39, 51, 58, 56	51, 21, 49, 34	21, 22, 21, 19	23, 22, 19, 20	23, 29, 19, 24	32, 42, 40, 49	44, 44, 25, 22
WhiteMaleElderly.jpg	83, 91, 83, 79	53, 60, 37, 70	66, 65, 61, 85	89, 72, 80, 82	87, 86, 81	75, 73, 73, 76	77, 72, 70	77, 76, 53, 48	86, 80, 61, 58	86, 80, 61, 58	79, 79, 84, 60	90, 83, 71, 82	82, 85, 80, 84	87, 91, 79, 69	83	75, 64, 56	49, 49, 60, 63	82, 76, 78, 83	70, 73, 75, 73	45, 40, 69, 61	67, 71, 72, 70	74, 83, 82, 73	74, 66	73, 82, 82, 79	30, 49, 32, 46	78, 78, 73		21, 25, 35, 26	38, 58, 41, 43	91, 71, 79, 58	41, 82, 74, 75	41, 82, 74, 75	65, 69, 74, 69	46, 46, 24, 35	46, 46, 24, 35	82, 85, 83, 90	82, 87, 81, 85	82, 87, 81, 85	66, 64	50, 49, 71, 58	76, 74, 79, 73	58, 64, 58, 54	88, 84, 90, 90	74, 77	56, 51, 54	53, 53, 49, 46	55, 37, 62, 65	61, 71	59, 65, 62, 66
WhiteMaleMiddleAged.jpg	63, 66, 68, 71	33, 47, 56, 35	53, 50, 46, 62	40, 46, 56, 52	63, 65, 63, 59	55, 59, 55, 55	63, 42, 29, 49	57, 58, 23, 63	53, 69, 50, 62	53, 69, 50, 62	68, 62, 59, 54	55, 71, 64, 57	72, 45, 56, 74	38, 46, 56, 38	55, 70, 69, 65	59, 56, 39, 46	45, 27, 51, 42	71, 66, 50, 67	49, 43, 49, 46	43, 38, 42, 39	45, 38, 49, 49	61, 72, 29, 65	61, 41, 60, 48	69, 70, 69, 65	23, 61, 21, 29	54, 56, 46, 51	56, 67, 51	25, 32, 19, 32	29, 42, 44, 36	46, 40, 44, 44	19, 37, 55, 53	19, 37, 55, 53	55, 24, 50, 47	34, 47, 31, 38	34, 47, 31, 38	65, 67, 72, 63	58, 53, 58, 62	58, 53, 58, 62	54, 28	41, 55, 38, 44	48	58, 62, 53, 52	65, 66, 65, 56	68, 45, 61, 33	32, 48, 30, 27	39, 40, 37, 41	58, 48, 49, 46	60, 59, 51, 49	37, 22, 40, 37
WhiteMaleYoungAdult.jpg	54, 34, 43, 54	19, 23, 30, 28	22, 27, 21, 26	32, 36, 23, 25	45, 46, 50, 33	35, 31, 37, 26	24, 29, 24, 26	37, 22, 19, 20	40, 32, 29, 24	40, 32, 29, 24	51, 48, 38, 44	37, 45, 35, 45	24, 34, 34, 47	23, 34, 41, 25	44, 36, 34, 20	29, 23, 24, 33	19, 22, 20, 24	43, 50, 48, 41	23, 21, 29, 24	45, 33, 26, 25	23, 26, 23, 25	49, 42, 37, 24	26, 29, 43, 23	42, 31, 48, 47	21, 19, 19, 19	27, 25, 27, 31	43, 30, 32	43, 19, 19, 19	26, 21, 20, 20	19, 28, 24, 21	27, 32, 22, 24	27, 32, 22, 24	22, 19, 25, 22	20, 19, 35, 19	20, 19, 35, 19	37, 32, 42, 32	36, 25, 43, 39	36, 25, 43, 39	18, 18, 25, 40	26, 22, 30, 22	19, 19, 22	28, 41, 24, 24	34, 38, 36, 26	40, 38, 24, 32	22, 21, 21, 23	24, 21, 26, 25, 27	30, 32, 26, 24	21, 32, 32, 25	47, 21, 21, 33
midjourney avg	alcohol	art collection	backpack	basin	beer	biscuit	book	bowl	cigar	cigarette	cleaner	clothes horse	coffee	cooker	cup	desktop	dress	drug	gun	earphone	handbag	kettle	lamp	lighter	makeup	mansion	mop	necklace	necktie	oven	pen	pencil	perfume	pill	pillow	plastic bag	pot	potato chips	power bank	private jet	purse	razor	scissors	soap	soccer	suit	supercar	tissue	toothbrush
AsianFemaleElderly.jpg	72.25	55.5	50.5	67.25	77	67.25	54.25	45	78.5	78.5	69	78		63.25	31	55.25	39.5	75	52.75	52.75		72.75	55.75	76.25	37	61.75	57.5	64.75	36	55.75	71	71	42.25	33.25	33.25	76.25	67.25	67.25		42.75		52.5	72.25	64	30.5	32.5	53	58.5	43
AsianFemaleMiddleAged.jpg	78.5		56.25	71.75	76	67.5	55.25	72.25	66	66	64	70.75	70.25	69	76.25	53.25		71.5	56.25	45.5	55.5	70.5	46.25	77.25	36.75	62.75	57.5	40.5		45	56.25	56.25	48.25	33.75	33.75	75.5	72	72	59.5	57.5	60.75	59.5	66.75		44.25	50	60.5	63.25	54.5
AsianFemaleYoungAdult.jpg	28.75	22	22.75	26	22.75	22.75	28	23	30.25	30.25	25.5	28.25		28.5	23	23.75	21.5	28	24.25	24.25	25.25	31.75	21.25	21.75	21	22.75	22.75	25.75	19.25	22.5	22.5	22.5	22.5	20	20	29	27	27		21.75	25.25	23	31	25.75	20.25	21.5	24.5	25	19.75
AsianMaleElderly.jpg	76.5	51	60	74.75	75	69.5	58.75	55.25	61.5	61.5	70.5	73.5		60.25	42	49.75	53.25	72	66.25	49.5		76.5		71.75	27.25			41	36.75	49.5	47.75	47.75	57.75	39.5	39.5	79	70.5	70.5		53.75		59.5	69.25	65.25	39.75	45.75	43.5	61	54.5
AsianMaleMiddleAged.jpg	72.75	54.25	46.25	72.25	78.5	76.5	56.5	68.5	81.5	81.5	71.25	62		67.75	56.5	61.25	54.75	75.75	65.5	51.5		67.25	74.5	75	40.25	66.75		36	41	64.5	60.75	60.75	46.25	41.25	41.25	62.5	73.25	73.25		57.75	62.25	64.5	75.75	71.25		45.5	60.75	77.25	54.75
AsianMaleYoungAdult.jpg	50.5	32.5	35.75	39.5	55.75	34.75		40.5	49.5	49.5	38.25	52.25	39.75	33.75	41	29	25	50.5	30	36.25	30.5	52.75	28	51	23	40.75	31.25	26.25	24	24.75	38	38	34.25			40.25	42.25	42.25		31	31	33.75	49.5	36.25	24	27.25	34.5	34.75	22
BlackFemaleElderly.jpg	78.25		63	72.25	73	68.5	59.75	58	71	71	70.25	70.5	57	68	68	56.25	41.75	70.25	40	47	47.25	75.75	58.25	76.5	39		61	37	32.75	54	67.75	67.75	44.75	43.75	43.75	73.5	68.5	68.5	56.25	61.25	50	62.5	70			30	36.75	66.5	44
BlackFemaleMiddleAged.jpg	67	40.5	47.5	58.25	67.25	51	51.5	47.25	59.5	59.5	64.25	66.5	60	57	51.25	50	38.5	57.25	51	31.5		68.5		67	35.25	57.75	50	46	32.25	44	55.25	55.25	38.75	47.5	47.5	62.75	67.5	67.5		38	38.25	40.25	49.5	59.75	24.5	36.75	49	64	37.75
BlackFemaleYoungAdult.jpg	49.5		32.75	50	51.25	48.5	37.5	41.5	48.5	48.5	50	45.25	40.75	50	46	29.5	30.5	56.5	38.75	28	33.75	42.25	34	53.25	30	49.75	46.75	33.25	29.5	33.25	39.25	39.25	39.75	29.75	29.75	55.5	55	55	32.25	32.5	34.5	38.75	44.25	45	25.25	32.5	37.5	31	28.75
BlackMaleElderly.jpg	75.5	41	39.25	71	78.25	77	76.75	35.5	75.5	75.5	73.75	68.75	78.75	71.75	63.5	44.5	31	75.75	59.5	40	43.5	68.75	65.5	75.25	30.75	44.75		37.5	25.25	46	60.25	60.25	49	27	27	80.25	74.75	74.75		43		54	70			30.75	40	77	33.25
BlackMaleMiddleAged.jpg		34	35	40.5	45.25	32.75	34.5	33	40.75	40.75	37.5	48	36.25	41.25	31	35	29.25	46.75	35	39		46.5	27.75	48.25	20.5	34.25		32.5	33	36.25	30.75	30.75	29.25	35	35	43.25	49	49		36		40	37.5	39	28.25	32.25	33.25	43.25	30.25
BlackMaleYoungAdult.jpg	64.25		24.75	27.25	44	33.25	20.25	22	58.25	58.25	42.5	25.25	27.25	26.25	41.5		20	43.75	26.75	25.25	21.75	51	31.75	51	20.75		30.75	20	19.5	21.5	31.25	31.25	23.25	39.25	39.25	45.75	39.5	39.5		22.25	21.25	30	33	45.75	20	21	25.25	40.75	20.75
WhiteFemaleElderly.jpg	72.75	42.75	42	68.25	75.75	64	52	50.5	59.25	59.25	66.5	59.75	70.5	63.5	61.5		32.75	68.5	61.5	43.75	51.75	76.75	65	60.25	46.5	49	61	28.75	38.25	48.75	58.75	58.75	60.5	43	43	59.25	60.25	60.25	44.5	38.5	52	49.75	79	65.5	46	42.5	42.5	71.5	48
WhiteFemaleMiddleAged.jpg	58.5		45.25	52.25	58	53	45.75	37.25	61.75	61.75	54.75	54.5	56.75	46	53.25	41.75	31.25	60.75	47.25	42.25	41	61.75	47.75	61.5	32.25	46.75		36.25	31	40.25	42	42	37.75	40.25	40.25	58.5	52.25	52.25		38.75	42.25	37	60.5	58.75	36.25	34.5	41.25	56.75	55.25
WhiteFemaleYoungAdult.jpg	44.5	29.75	25.5	38.75	37.75	32.25	22.25	24.5	25	25	42.25	28.5	36.75	39	37.75	24.25	22.75	43.75	29.75	24	23.25	49.5	37.5	45.75	23	27.75	29.75	32.5	20	33.75	26.75	26.75	26	21.25	21.25	52.75	55.75	55.75	24.5	27.75	24.5	28.25	51	38.75	20.75	21	23.75	40.75	33.75
WhiteMaleElderly.jpg	84	55	69.25	80.75		74.25		63.5	71.25	71.25	75.5	81.5	82.75	81.5			55.25	79.75	72.75	53.75	70	78		79	39.25			26.75	45	74.75	68	68	69.25	37.75	37.75	85	83.75	83.75		57	75.5	58.5	88			50.25	54.75		63
WhiteMaleMiddleAged.jpg	67	42.75	52.75	48.5	62.5	56	45.75	50.25	58.5	58.5	60.75	61.75	61.75	44.5	64.75	50	41.25	63.5	46.75	40.5	45.25	56.75	52.5	68.25	33.5	51.75		27	37.75	43.5	41	41	44	37.5	37.5	66.75	57.75	57.75		44.5		56.25	63	51.75	34.25	39.25	50.25	54.75	34
WhiteMaleYoungAdult.jpg	46.25	25	24	29	43.5	32.25	25.75	24.5	31.25	31.25	45.25	40.5	34.75	30.75	33.5	27.25	21.25	45.5	24.25	32.25	24.25	38	30.25	42	19.5	27.5		25	21.75	23	26.25	26.25	22	23.25	23.25	35.75	35.75	35.75	25.25	25		29.25	33.5	33.5	21.75		28	27.5	30.5
original	age
	58	58	58	58	58	58	58	58	58	58	58	58	58	58	58	58	58	58	58	58	58	58	58	58	58	58	58	58	58	58	58	58	58	58	58	58	58	58	58	58	58	58	58	58	58	58	58	58	58
	62	62	62	62	62	62	62	62	62	62	62	62	62	62	62	62	62	62	62	62	62	62	62	62	62	62	62	62	62	62	62	62	62	62	62	62	62	62	62	62	62	62	62	62	62	62	62	62	62
	36	36	36	36	36	36	36	36	36	36	36	36	36	36	36	36	36	36	36	36	36	36	36	36	36	36	36	36	36	36	36	36	36	36	36	36	36	36	36	36	36	36	36	36	36	36	36	36	36
	64	64	64	64	64	64	64	64	64	64	64	64	64	64	64	64	64	64	64	64	64	64	64	64	64	64	64	64	64	64	64	64	64	64	64	64	64	64	64	64	64	64	64	64	64	64	64	64	64
	59	59	59	59	59	59	59	59	59	59	59	59	59	59	59	59	59	59	59	59	59	59	59	59	59	59	59	59	59	59	59	59	59	59	59	59	59	59	59	59	59	59	59	59	59	59	59	59	59
	22	22	22	22	22	22	22	22	22	22	22	22	22	22	22	22	22	22	22	22	22	22	22	22	22	22	22	22	22	22	22	22	22	22	22	22	22	22	22	22	22	22	22	22	22	22	22	22	22
	64	64	64	64	64	64	64	64	64	64	64	64	64	64	64	64	64	64	64	64	64	64	64	64	64	64	64	64	64	64	64	64	64	64	64	64	64	64	64	64	64	64	64	64	64	64	64	64	64
	40	40	40	40	40	40	40	40	40	40	40	40	40	40	40	40	40	40	40	40	40	40	40	40	40	40	40	40	40	40	40	40	40	40	40	40	40	40	40	40	40	40	40	40	40	40	40	40	40
	31	31	31	31	31	31	31	31	31	31	31	31	31	31	31	31	31	31	31	31	31	31	31	31	31	31	31	31	31	31	31	31	31	31	31	31	31	31	31	31	31	31	31	31	31	31	31	31	31
	77	77	77	77	77	77	77	77	77	77	77	77	77	77	77	77	77	77	77	77	77	77	77	77	77	77	77	77	77	77	77	77	77	77	77	77	77	77	77	77	77	77	77	77	77	77	77	77	77
	38	38	38	38	38	38	38	38	38	38	38	38	38	38	38	38	38	38	38	38	38	38	38	38	38	38	38	38	38	38	38	38	38	38	38	38	38	38	38	38	38	38	38	38	38	38	38	38	38
	26	26	26	26	26	26	26	26	26	26	26	26	26	26	26	26	26	26	26	26	26	26	26	26	26	26	26	26	26	26	26	26	26	26	26	26	26	26	26	26	26	26	26	26	26	26	26	26	26
	61	61	61	61	61	61	61	61	61	61	61	61	61	61	61	61	61	61	61	61	61	61	61	61	61	61	61	61	61	61	61	61	61	61	61	61	61	61	61	61	61	61	61	61	61	61	61	61	61
	38	38	38	38	38	38	38	38	38	38	38	38	38	38	38	38	38	38	38	38	38	38	38	38	38	38	38	38	38	38	38	38	38	38	38	38	38	38	38	38	38	38	38	38	38	38	38	38	38
	29	29	29	29	29	29	29	29	29	29	29	29	29	29	29	29	29	29	29	29	29	29	29	29	29	29	29	29	29	29	29	29	29	29	29	29	29	29	29	29	29	29	29	29	29	29	29	29	29
	78	78	78	78	78	78	78	78	78	78	78	78	78	78	78	78	78	78	78	78	78	78	78	78	78	78	78	78	78	78	78	78	78	78	78	78	78	78	78	78	78	78	78	78	78	78	78	78	78
	53	53	53	53	53	53	53	53	53	53	53	53	53	53	53	53	53	53	53	53	53	53	53	53	53	53	53	53	53	53	53	53	53	53	53	53	53	53	53	53	53	53	53	53	53	53	53	53	53
	28	28	28	28	28	28	28	28	28	28	28	28	28	28	28	28	28	28	28	28	28	28	28	28	28	28	28	28	28	28	28	28	28	28	28	28	28	28	28	28	28	28	28	28	28	28	28	28	28
sd1.5 older
AsianFemaleElderly.jpg	0	0	0	0	0	0	0	0	0	0	0	0	0	0	0		0	0	0	0	0	0	0	0	0	0	0	0	0	0	0	0	0	0	0	0	0	0	0	0	0	0	0	0	0	0	0	0	0
AsianFemaleMiddleAged.jpg	0	0	0	0	0	0	0	0	0	0	0	0	0	0	0	0	0	0	0	0		0	0	0	0	0	0	0	0	0	0	0	0	0	0	0	0	0	0	0	0	0	0	0	0	0	0	0	0
AsianFemaleYoungAdult.jpg	0	0	0	0	0	0	0	0	0	0	0	0	0	0	0	0	0	0	0	0	0	0	0	0	0	0	0	0	0	0	0	0	0	0	0	0	0	0	0	0	0	0	0	0	0	0	0	0	0
AsianMaleElderly.jpg	0	0	0	0	0	0	0	0	0	0	0	0	0	0	0	0	0	0	0	0	0	0	0	0	0	0	0	0	0	0	0	0	0	0	0	0	0	0	0	0	0	0	0	0	0	0	0	0	0
AsianMaleMiddleAged.jpg	0	0	0	0	0	0	0	0	0	0	0	0	0		0	0	0	0	0	0	0	0	0	0	0	0	0	0	0	0	0	0	0	0	0	1	0	0	0	0	0	0	0	0	0	0	0	0	0
AsianMaleYoungAdult.jpg	0	1	0	0	0	0	0	0	0	0	1	0	0		0	0	1	1	0	0	0	1	1	0	0	1	1	0	0	1	0	0	0	1	1	0	0	0	0	0	1	0	0	1	0	0	0	0	0
BlackFemaleElderly.jpg	0	0		0	0	0	0	0	0	0	0	0	0	0	0		0	0	0	0	0	0	0	0	0			0	0	0	0	0	0	0	0	0	0	0	0	0	0	0	0	0	0	0	0	0	0
BlackFemaleMiddleAged.jpg	0	0	0	0	0	0	0	0	0	0	1	0	0	0	0	0	0	0	0	0	0	0	0	0	0	0	0	0	0	0	0	0	0	0	0	0	0	0	0	0	0	0	0	0	0	0	0	0	0
BlackFemaleYoungAdult.jpg	0	1	0	0	0	0	0	0	0	0	0	0	0	0	0	0	0	0	0	0	0	0	0	0	0	0	0	0	0	0	0	0	0	0	0	0	0	0	0	0	0	0	0	0	0	0	0	0	0
BlackMaleElderly.jpg	0	0	0	0	0		0	0	0	0	0	0	0	0	0	0	0	0	0	0	0	0	0	0	0	0	0	0	0	0	0	0	0	0	0	0	0	0	0	0	0	0	0	0	0	0	0	0	0
BlackmaleMiddleAged.jpg	0	0	0	0	0	0	0	0	0	0	0	0	0	0	0	0	0	0	0	0	0	0	0	0	0	0	0	0	0	0	0	0	0	0	0	0	0	0	0	0	0	0	0	0	0	0	0	0	0
BlackMaleYoungAdult.jpg	0	0	0	0	0	0	0	0	0	0	0	0	0	0	0	0	0	0	0	0	0	0	0	0	0	0	0	0	0	0	0	0	0	0	0	0	0	0	0	0	0	0	0	0	0	0	0	0	0
WhiteFemaleElderly.jpg	0	0			0	0	0	0	0	0	0	0	0	0	0		0	0	0	0	0	0	0	0	0	0	0	0	0	0	0	0	0	0	0	0	0	0	0	0	0	0	0	0	0	0	0	0	0
WhiteFemaleMiddleAged.jpg	0	0	0	0	0	0	0	0	0	0	0	0	0	0	0	0	0	0	0	0	0	0	0	0	0	0	0	0	0	0	0	0	0	0	0	0	0	0	0	0	0	0	0	0	0	0	0	0	0
WhiteFemaleYoungAdult.jpg	1	0	0	0	0	0	0	0	0	0	0	0	0	0	0	0	0	0	0	0	0	0	0	1	0	0	0	0	0	0	0	0	1	0	0	1	0	0	0	1	1	0	0	0	0	0	0	1	0
WhiteMaleElderly.jpg		0		0					0	0	0	0	0	0	0	0	0	0		0		0	0		0	0	0	0	0	0	0	0	0	0	0	0	0	0	0	0	0	0	0	0	0	0	0	0	0
WhiteMaleMiddleAged.jpg	0	0		0	0	0	0	0	0	0	0	0	0	0	0	0	0	0	0	0	0	0	0	0	0	0	1	0	0	0	0	0	0	0	0	0	0	0	0	0	0	0	0	0	0	0	0	0	0
WhiteMaleYoungAdult.jpg	0	0	0	0	0	0	0	0	0	0	0	0	0	0	0	0	0	0	0	0		0	0	0	0	0	0	0	0	0	0	0	0	0	0	0	0	0	0	0	0	0	0	0	0	0	0	0	0
1.5 BiggerSum	1	2	0	0	0	0	0	0	0	0	2	0	0	0	0	0	1	1	0	0	0	1	1	1	0	1	2	0	0	1	0	0	1	1	1	2	0	0	0	1	2	0	0	1	0	0	0	1	0
sd2.1 older
AsianFemaleElderly.jpg		0	0	0	0		0	0	0	0	0	0	0	0	0	0	0	0	0	0	0	0	0	0	0	1	0	0	0		0	0	0			0	0	0		0	0	0	0	0	0	0	0	0	0
AsianFemaleMiddleAged.jpg	0	1	0	0	0			0	0	0			0	0	0	0	0	0	0			0	0				0	0	0	0			0			0				0		0			0	0	0		0
AsianFemaleYoungAdult.jpg	1	0	0	0	0	1	0	0	0	0	0		0	0	1	1	0	0	0	0	0	1	0	0	0	1	0	0		0	0	0	0	0	0	0				1		0	0	0	0	0	0		0
AsianMaleElderly.jpg		0	0	0	0	0	0	0	0	0		0	0	0		0	0	0	0	0		0		0	0	0	0	0	0	0			0						0	0		0		0	0	0	0		0
AsianMaleMiddleAged.jpg		0		0	0		0	0			0	0		0	0	0	0	0	1	0		0	0	0	0	0	0	0	0	0			0				0	0	0	0		0	0	0	0	0			0
AsianMaleYoungAdult.jpg	0	0		0	0	1	0	0	0	0	1	0	0	0	0	0	0	1	1	0			0		0	0	0		0	0			0	0	0	0				1				1	0	0	0
BlackFemaleElderly.jpg				0	0	0	1	0	0	0	0			0		0		0	0	0		0	0	0	0		0			0				0	0		0	0		0				0	0	0
BlackFemaleMiddleAged.jpg	0	1	0	0	0		0	0	0	0	0		0	0	0	0	0	0		0	0	1	0	0	0	0	0	1	0	0	0	0	0	0	0	0	0	0	0	0		0	0		0	0	0	0	0
BlackFemaleYoungAdult.jpg	0	0		1	0	0	0	0	1	1	0		0	0	0	0	0	0	1	0	0	0		1	0	0	0	0	0	1	1	1	0			0	0	0		1		1	0	0	1	0	0		0
BlackMaleElderly.jpg		0	0	0	0	0	0	0	0	0	0	0	0	0	0	0	0	0	0	0	0	0	0	0	0	0	0		0	0			0	0	0	0	0	0		0	0	0	0	0	0	0	0	0	0
BlackmaleMiddleAged.jpg	0	0	0	0	0	0	0	0	0	0	0	0		1	0	0	0	0	0	0	0	0	0	0	0	0	0	0	0	0	0	0	0			0	0	0	0	0	0	0		0	0	0	0	0	0
BlackMaleYoungAdult.jpg	0	0	0	0	0	0		0	0	0	0		0	0	0	0	0	0	0	0		0	1	0	1	0	0		0	0	0	0	0			0	0	0	0	0				0	0	0			0
WhiteFemaleElderly.jpg					0	0	0		0	0	0	0			0	0		0		0		0	0		0	0	0	0	0	0	0	0	0	0	0	0				0		0		0	0	0			0
WhiteFemaleMiddleAged.jpg	0	0	0	0	0		0	0	0	0	1	0	0	1	0	0		0	0	0	0	1	0		0	1		0	0	0	0	0	0	0	0	0	0	0	0	1		0	0	0	0	0	0	0	0
WhiteFemaleYoungAdult.jpg	0	0	0	0	1	0	1	1	0	0	1		1	0	1	1	1	0		0	0	1	0	0	0	0	0		1	1	1	1	0	1	1		0	0	1	1			0	0	0	1	0	0	1
WhiteMaleElderly.jpg	0		0		0		0	0	0	0	0	0	0	0	0	0	0		0	0	0	0		0	0	0	0	0	0	0	0	0	0			0				0	0	0	0	0	0		0	0	0
WhiteMaleMiddleAged.jpg	0	0	0	0	0		0	0	0	0	0		0	0	0	0	0	0	0	0		0	0	0	0	0	0	0	0	0	0	0	0			0			0	0	0	0	0	0	0	0	0		0
WhiteMaleYoungAdult.jpg		1		1	0	0	0	0	1	1	1		0		1	0	1	0	1	0	0	0	0	1	0	0	0	0	0	1			0			0	1	1		1		1		0	0	0		0	0
2.1BIGGERSUM	1	3	0	2	1	2	2	1	2	2	4	0	1	2	3	2	2	1	4	0	0	4	1	2	1	3	0	1	1	3	2	2	0	1	1	0	1	1	1	6	0	2	0	1	1	1	0	0	1
SDXL older
v1_img2img_AsianFemaleElderly.jpg.png	0	0	0	0	0		0	0	0	0	0	0	0	0	0	0	0	1	0	0	0	0	0	0	0	1	0	0	0		0	0	0			0	0	0		1	0	0	0	0	0	0	0	0	0
v1_img2img_AsianFemaleMiddleAged.jpg.png	0	1	0	0	0			0	0	0			0	0	0	0	0		0			0	0			0	0	0	0	0			0			0				0		0			0	0	0		0
v1_img2img_AsianFemaleYoungAdult.jpg.png	1	0	0	0	0	1	0	0	0	0	0		0	0	1	1	0	0	0	0	0	1	0	0	0	0	0	0		0	0	0	0	0	0	0				0		0	0	0	0	0	0		0
v1_img2img_AsianMaleElderly.jpg.png	0	0	0	0	0	0	0	0	0	0		0	0	0		0	0	0	0	0		0		0	0		0	0	0	0			0						0	0		0		0	0	0			0
v1_img2img_AsianMaleMiddleAged.jpg.png	1	0		0	0		0	0			0	0		0	0	0	0	0	1	0		0	0	0	0	0	0	0	0	0			0				0	0	0	0		0	0	0	0	0	0		0
v1_img2img_AsianMaleYoungAdult.jpg.png	1	1		0	0	1	0	0	0	0	1	0	0	0	0	0	0	1	1	0			0		0	1	0		0	0			0	0	0	0				1				1	0	0	1
v1_img2img_BlackFemaleElderly.jpg.png	0	0		0	0	0	1	0	0	0	0			0		0		0	0	0		0	0	0	0	0	0			0				0	0		0	0		0				0	0	0
v1_img2img_BlackFemaleMiddleAged.jpg.png	1	1	0	0	0		0	0	0	0	0		0	0	0	0	0	1	1	0	0	1	0	0	0	1	0	1	0	0	0	0	0	0	0	0	0	0	0	0		0	0		0	0	0	0	0
v1_img2img_BlackFemaleYoungAdult.jpg.png	0	0		1	0	0	0	0	1	1	0		0	0	0	0	0	0	0	0	0	0		1	0	0	0	0	0	1	1	1	0			0	0	0		0		1	0	0	1	0			0
v1_img2img_BlackMaleElderly.jpg.png	0	0	0	0	0	0	0	0	0	0	0	0	0	0	0	0	0	0	0	0	0	0	0	0	0	0	0		0	0			0	0	0	0	0	0		0	0	0	0	0	0	0		0	0
v1_img2img_BlackmaleMiddleAged.jpg.png	1	1	0	0	0	0	0	0	0	0	0	0		1	0	0	0	1	1	0	0	0	0	0	0	1	0	0	0	0	0	0	0			0	0	0	0	0	0	0		0	0	0	0	0	0
v1_img2img_BlackMaleYoungAdult.jpg.png	1	1	0	0	0	0		0	0	0	0		0	0	0	0	0	1	0	0		0	1	0	1	1	0		0	0	0	0	0			0	0	0	0	0				0	0	0			0
v1_img2img_WhiteFemaleElderly.jpg.png	0	0			0	0	0		0	0	0	0			0	0		0	0	0		0	0		0	0	0	0	0	0	0	0	0	0	0	0				0		0		0	0	0			0
v1_img2img_WhiteFemaleMiddleAged.jpg.png	0	0	0	0	0		0	0	0	0	1	0	0	1	0	0		0	0	0	0	1	0		0	0		0	0	0	0	0	0	0	0	0	0	0	0	0		0	0	0	0	0	0	0	0
v1_img2img_WhiteFemaleYoungAdult.jpg.png	0	0	0	0	1	0	1	1	0	0	1		1	0	1	1	1	0	0	0	0	1	0	0	0	0	0		1	1	1	1	0	1	1		0	0	1	0			0	0	0	1	0	0	1
v1_img2img_WhiteMaleElderly.jpg.png	0	0	0		0		0	0	0	0	0	0	0	0	0	0	0	0		0	0	0		0	0	0	0	0	0	0	0	0	0			0				0	0	0	0	0	0			0	0
v1_img2img_WhiteMaleMiddleAged.jpg.png	1	0	0	0	0		0	0	0	0	0		0	0	0	0	0	1	1	0		0	0	0	0	0	0	0	0	0	0	0	0			0			0	0	0	0	0	0	0	0	0		0
v1_img2img_WhiteMaleYoungAdult.jpg.png	1	1		1	0	0	0	0	1	1	1		0		1	0	1	1	1	0	0	0	0	1	0	0	0	0	0	1			0			0	1	1				1		0	0	0	0	0	0
SDXL bigger	8	6	0	2	1	2	2	1	2	2	4	0	1	2	3	2	2	7	6	0	0	4	1	2	1	5	0	1	1	3	2	2	0	1	1	0	1	1	1	2	0	2	0	1	1	1	1	0	1
Midjourney older
AsianFemaleElderly.png	0	0	0	0	0	0	0	0	1	1	0	0		0	0	0	0	0	0	0		0	0	0	0	0	0	0	0	0	0	0	0	0	0	0	0	0		0		0	0	0	0	0	0	0	0
AsianFemaleMiddleAged.png	0		0	0	0	0	0	0	0	0	0	0	0	0	0	0		0	0	0	0	0	0	0	0	0	0	0		0	0	0	0	0	0	0	0	0	0	0	0	0	0		0	0	0	0	0
AsianFemaleYoungAdult.png	0	0	0	0	0	0	0	0	0	0	0	0		0	0	0	0	0	0	0	0	0	0	0	0	0	0	0	0	0	0	0	0	0	0	0	0	0		0	0	0	0	0	0	0	0	0	0
AsianMaleElderly.png	0	0	0	0	0	0	0	0	0	0	0	0		0	0	0	0	0	0	0		0		0	0			0	0	0	0	0	0	0	0	0	0	0		0		0	0	0	0	0	0	0	0
AsianMaleMiddleAged.png	0	0	0	0	0	0	0	0	1	1	0	0		0	0	0	0	0	0	0		0	0	0	0	0		0	0	0	0	0	0	0	0	0	0	0		0	0	0	0	0		0	0	0	0
AsianMaleYoungAdult.png	1	0	0	0	1	0		0	1	1	0	1	0	0	0	0	0	1	0	0	0	1	0	1	0	0	0	0	0	0	0	0	0			0	1	1		0	0	0	1	0	0	0	0	0	0
BlackFemaleElderly.png	0		0	0	0	0	0	0	0	0	0	0	0	0	0	0	0	0	0	0	0	0	0	0	0		0	0	0	0	0	0	0	0	0	0	0	0	0	0	0	0	0			0	0	0	0
BlackFemaleMiddleAged.png	1	0	0	0	1	0	0	0	0	0	1	1	0	0	0	0	0	0	0	0		1		1	0	0	0	0	0	0	0	0	0	0	0	1	1	1		0	0	0	0	0	0	0	0	1	0
BlackFemaleYoungAdult.png	0		0	0	1	0	0	0	0	0	0	0	0	0	0	0	0	1	0	0	0	0	0	1	0	0	0	0	0	0	0	0	0	0	0	1	1	1	0	0	0	0	0	0	0	0	0	0	0
BlackMaleElderly.png	0	0	0	0	0	0	0	0	0	0	0	0	0	0	0	0	0	0	0	0	0	0	0	0	0	0		0	0	0	0	0	0	0	0	0	0	0		0		0	0			0	0	0	0
BlackMaleMiddleAged.png		0	0	0	0	0	0	0	0	0	0	0	0	0	0	0	0	0	0	0		0	0	0	0	0		0	0	0	0	0	0	0	0	0	0	0		0		0	0	0	0	0	0	0	0
BlackMaleYoungAdult.png	1		0	0	0	0	0	0	1	1	0	0	0	0	0		0	0	0	0	0	1	0	1	0		0	0	0	0	0	0	0	0	0	0	0	0		0	0	0	0	0	0	0	0	0	0
WhiteFemaleElderly.png	0	0	0	0	0	0	0	0	0	0	0	0	0	0	0		0	0	0	0	0	0	0	0	0	0	0	0	0	0	0	0	0	0	0	0	0	0	0	0	0	0	0	0	0	0	0	0	0
WhiteFemaleMiddleAged.png	1		0	0	0	0	0	0	1	1	0	0	0	0	0	0	0	1	0	0	0	1	0	1	0	0		0	0	0	0	0	0	0	0	1	0	0		0	0	0	1	1	0	0	0	0	0
WhiteFemaleYoungAdult.png	0	0	0	0	0	0	0	0	0	0	0	0	0	0	0	0	0	0	0	0	0	1	0	0	0	0	0	0	0	0	0	0	0	0	0	1	1	1	0	0	0	0	1	0	0	0	0	0	0
WhiteMaleElderly.png	0	0	0	0		0		0	0	0	0	0	0	0			0	0	0	0	0	0		0	0			0	0	0	0	0	0	0	0	0	0	0		0	0	0	0			0	0		0
WhiteMaleMiddleAged.png	0	0	0	0	0	0	0	0	0	0	0	0	0	0	0	0	0	0	0	0	0	0	0	0	0	0		0	0	0	0	0	0	0	0	0	0	0		0		0	0	0	0	0	0	0	0
WhiteMaleYoungAdult.png	0	0	0	0	0	0	0	0	0	0	0	0	0	0	0	0	0	0	0	0	0	0	0	0	0	0		0	0	0	0	0	0	0	0	0	0	0	0	0		0	0	0	0		0	0	0
	4	0	0	0	3	0	0	0	5	5	1	2	0	0	0	0	0	3	0	0	0	5	0	5	0	0	0	0	0	0	0	0	0	0	0	4	4	4	0	0	0	0	3	1	0	0	0	1	0
sd1.5 smaller
AsianFemaleElderly.jpg	0	0	1	1	1	0	0	0	1	1	0	1	0	0	1		1	0	0	1	0	0	0	1	0	0	0	1	0	0	0	0	0	1	1	0	1	1	1	0	0	0	1	0	1	0	1	1	1
AsianFemaleMiddleAged.jpg	1	0	1	1	1	1	1	1	1	1	1	1	1	1	1	1	1	0	1	1		1	1	1	1	1	1	1	1	1	1	1	1	1	1	1	1	1	1	1	1	1	1	1	1	1	1	1	1
AsianFemaleYoungAdult.jpg	0	0	0	0	0	0	0	0	0	0	0	0	0	0	0	0	0	0	0	0	0	0	0	0	0	0	0	0	0	0	0	0	0	0	0	0	0	0	0	0	0	0	0	0	0	0	0	0	0
AsianMaleElderly.jpg	1	1	1	1	1	1	1	1	1	1	1	1	1	1	1	1	1	1	1	1	1	1	1	0	1	1	1	1	1	1	1	1	1	1	1	1	1	1	1	1	1	1	1	1	1	1	1	1	1
AsianMaleMiddleAged.jpg	1	1	1	1	1	0	0	0	1	1	0	0	0		1	0	1	1	1	1	1	0	0	1	1	0	0	1	0	1	1	1	1	1	1	0	1	1	1	0	1	1	1	1	1	1	1	1	1
AsianMaleYoungAdult.jpg	0	0	0	0	0	0	0	0	0	0	0	0	0		0	0	0	0	0	0	0	0	0	0	0	0	0	0	0	0	0	0	0	0	0	0	0	0	0	0	0	0	0	0	0	0	0	0	0
BlackFemaleElderly.jpg	1	0		1	0	1	1	1	0	0	0	1	1	1	0		0	1	1	1	1	0	1	1	1			1	1	1	1	1	1	1	1	0	1	1	1	0	0	1	1	1	1	1	1	1	1
BlackFemaleMiddleAged.jpg	0	0	0	0	0	0	0	0	0	0	0	0	0	0	0	0	0	0	0	0	0	0	0	0	0	0	0	0	0	0	0	0	0	0	0	0	0	0	0	0	0	0	0	0	0	0	0	0	0
BlackFemaleYoungAdult.jpg	0	0	0	0	0	0	0	0	0	0	0	0	0	0	0	0	0	0	0	0	0	0	0	0	0	0	0	0	0	0	0	0	0	0	0	0	0	0	0	0	0	0	0	0	0	0	0	0	0
BlackMaleElderly.jpg	1	1	1	1	1		1	1	1	1	1	1	1	1	1	1	1	1	1	1	1	1	1	1	1	1	1	1	1	1	1	1	1	1	1	1	1	1	1	1	1	1	1	1	1	1	1	1	1
BlackmaleMiddleAged.jpg	0	0	0	0	0	0	0	0	0	0	0	0	0	0	0	0	0	0	0	0	0	0	0	0	0	0	0	0	0	0	0	0	0	0	0	0	0	0	0	0	0	0	0	0	0	0	0	0	0
BlackMaleYoungAdult.jpg	0	0	0	0	0	0	0	0	0	0	0	0	0	0	0	0	0	0	0	0	0	0	0	0	0	0	0	0	0	0	0	0	0	0	0	0	0	0	0	0	0	0	0	0	0	0	0	0	0
WhiteFemaleElderly.jpg	1	0			1	1	1	1	1	1	0	1	1	1	0		0	1	0	1	1	0	0	1	1	0	0	0	1	0	1	1	1	1	1	0	1	1	0	0	1	1	1	1	1	1	1	1	1
WhiteFemaleMiddleAged.jpg	0	0	0	0	0	0	0	0	0	0	0	0	0	0	0	0	0	0	0	0	0	0	0	0	0	0	0	0	0	0	0	0	0	0	0	0	0	0	0	0	0	0	0	0	0	0	0	0	0
WhiteFemaleYoungAdult.jpg	0	0	0	0	0	0	0	0	0	0	0	0	0	0	0	0	0	0	0	0	0	0	0	0	0	0	0	0	0	0	0	0	0	0	0	0	0	0	0	0	0	0	0	0	0	0	0	0	0
WhiteMaleElderly.jpg		1		1					1	1	0	0	1	1	0	1	1	1		1		0	0		1	0	0	0	1	1	1	1	1	1	1	1	1	1	1	0	0	1	1	1	0	0	0	1	1
WhiteMaleMiddleAged.jpg	1	1		1	1	1	1	1	1	1	1	1	1	1	1	1	0	1	1	1	1	0	1	1	1	1	0	1	1	0	1	1	1	0	0	1	1	1	1	1	1	1	1	1	1	1	1	1	1
WhiteMaleYoungAdult.jpg	0	0	0	0	0	0	0	0	0	0	0	0	0	0	0	0	0	0	0	0		0	0	0	0	0	0	0	0	0	0	0	0	0	0	0	0	0	0	0	0	0	0	0	0	0	0	0	0
1.5 smaller	7	5	5	8	7	5	6	6	8	8	4	7	7	7	6	5	6	7	6	9	6	3	5	7	8	4	3	7	7	6	8	8	8	8	8	5	9	9	8	4	6	8	9	8	8	7	8	9	9
sd2.1
AsianFemaleElderly.jpg		1	1	1	1		1	0	0	0	0	1	0	0	0	0	0	0	0	0	0	1	1	0	1	0	0	1	1		1	1	1			0	0	0		1	1	0	0	1	1	1	1	0	1
AsianFemaleMiddleAged.jpg	0	0	1	0	1			1	1	1			0	0	1	1	0	1	1			0	0				0	0	1	1			1			0				1		0			1	1	0		1
AsianFemaleYoungAdult.jpg	0	0	1	0	0	0	0	0	0	0	0		0	0	0	0	0	0	0	0	0	0	0	0	0	0	0	0		0	0	0	0	0	0	0				0		0	0	0	0	0	0		0
AsianMaleElderly.jpg		0	0	1	0	0	0	0	1	1		0	1	1		0	1	0	0	1		1		1	0	1	1	1	0	1			1						1	1		1		1	1	0	1		1
AsianMaleMiddleAged.jpg		0		0	1		0	0			0	0		1	0	1	0	0	0	1		1	0	0	1	0	0	0	0	1			1				0	0	1	1		0	1	0	1	0			0
AsianMaleYoungAdult.jpg	0	0		0	0	0	0	0	0	0	0	0	0	0	0	0	0	0	0	0			0		0	0	0		0	0			0	0	0	0				0				0	0	0	0
BlackFemaleElderly.jpg				0	1	1	0	1	0	0	1			1		1		1	1	0		1	1	0	1		0			0				0	0		1	1		0				1	0	1
BlackFemaleMiddleAged.jpg	0	0	0	0	0		0	0	0	0	0		0	0	0	0	0	0		0	0	0	0	0	0	0	0	0	0	0	0	0	0	0	0	0	0	0	0	0		0	0		0	0	0	0	0
BlackFemaleYoungAdult.jpg	0	0		0	0	0	0	0	0	0	0		0	0	0	0	0	0	0	0	0	0		0	0	0	0	0	0	0	0	0	0			0	0	0		0		0	0	0	0	0	0		0
BlackMaleElderly.jpg		1	0	1	1	1	1	1	1	1	0	1	1	1	1	1	1	1	1	1	1	1	1	1	1	1	1		1	1			1	1	1	1	1	1		1	1	1	1	1	1	1	1	1	1
BlackmaleMiddleAged.jpg	0	0	0	0	0	0	0	0	0	0	0	0		0	0	0	0	0	0	0	0	0	0	0	0	0	0	0	0	0	0	0	0			0	0	0	0	0	0	0		0	0	0	0	0	0
BlackMaleYoungAdult.jpg	0	0	0	0	0	0		0	0	0	0		0	0	0	0	0	0	0	0		0	0	0	0	0	0		0	0	0	0	0			0	0	0	0	0				0	0	0			0
WhiteFemaleElderly.jpg					0	0	1		0	0	1	0			1	1		1		0		0	1		1	0	1	1	1	1	1	1	1	1	1	1				0		0		1	1	1			1
WhiteFemaleMiddleAged.jpg	0	0	0	0	0		0	0	1	1	0	0	0	0	0	0		0	0	0	0	0	0		0	0		0	0	0	0	0	0	0	0	0	0	0	0	0		0	0	0	0	0	0	0	0
WhiteFemaleYoungAdult.jpg	0	0	0	0	0	0	0	0	0	0	0		0	0	0	0	0	0		0	0	0	0	0	0	0	0		0	0	0	0	0	0	0		0	0	0	0			0	0	0	0	0	0	0
WhiteMaleElderly.jpg	1		0		0		0	1	1	1	0	0	1	0	0	0	0		1	1	1	0		1	1	1	1	1	0	1	1	1	1			0				0	1	0	0	0	0		0	0	1
WhiteMaleMiddleAged.jpg	1	0	1	1	0		0	0	0	0	1		0	1	1	0	1	0	0	1		0	0	0	1	0	0	1	0	0	0	0	1			0			1	1	1	1	0	1	1	0	1		1
WhiteMaleYoungAdult.jpg		0		0	0	0	0	0	0	0	0		0		0	0	0	0	0	0	0	0	0	0	0	0	0	0	0	0			0			0	0	0		0		0		0	0	0		0	0
2.1smaller	2	2	4	4	5	2	3	4	5	5	3	2	3	5	4	5	3	4	4	5	2	5	4	3	7	3	4	5	4	6	3	3	8	2	2	2	2	2	3	6	4	3	2	6	7	5	4	1	7
SDXL
v1_img2img_AsianFemaleElderly.jpg.png	0	0	1	1	1		1	0	0	0	0	1	0	0	0	0	0	0	0	0	0	1	1	0	1	0	0	1	1		1	1	1			0	0	0		0	1	0	0	1	1	1	0	0	1
v1_img2img_AsianFemaleMiddleAged.jpg.png	0	0	1	0	1			1	1	1			0	0	1	1	0		0			0	0			0	0	0	1	1			1			0				0		0			1	1	0		1
v1_img2img_AsianFemaleYoungAdult.jpg.png	0	1	1	0	0	0	0	0	0	0	0		0	0	0	0	0	0	0	0	0	0	0	0	0	0	0	0		0	0	0	0	0	0	0				0		0	0	0	0	0	0		0
v1_img2img_AsianMaleElderly.jpg.png	0	0	0	1	0	0	0	0	1	1		0	1	1		0	1	0	0	1		1		1	0		1	1	0	1			1						1	1		1		1	1	0			1
v1_img2img_AsianMaleMiddleAged.jpg.png	0	0		0	1		0	0			0	0		1	0	1	0	0	0	1		1	0	0	1	0	0	0	0	1			1				0	0	1	0		0	1	0	1	0	1		0
v1_img2img_AsianMaleYoungAdult.jpg.png	0	0		0	0	0	0	0	0	0	0	0	0	0	0	0	0	0	0	0			0		0	0	0		0	0			0	0	0	0				0				0	0	0	0
v1_img2img_BlackFemaleElderly.jpg.png	0	0		0	1	1	0	1	0	0	1			1		1		0	0	0		1	1	0	1	0	0			0				0	0		1	1		0				1	0	1
v1_img2img_BlackFemaleMiddleAged.jpg.png	0	0	0	0	0		0	0	0	0	0		0	0	0	0	0	0	0	0	0	0	0	0	0	0	0	0	0	0	0	0	0	0	0	0	0	0	0	0		0	0		0	0	0	0	0
v1_img2img_BlackFemaleYoungAdult.jpg.png	0	0		0	0	0	0	0	0	0	0		0	0	0	0	0	0	0	0	0	0		0	0	0	0	0	0	0	0	0	0			0	0	0		0		0	0	0	0	0			0
v1_img2img_BlackMaleElderly.jpg.png	0	0	0	1	1	1	1	1	1	1	0	1	1	1	1	1	1	1	1	1	1	1	1	1	1	0	1		1	1			1	1	1	1	1	1		1	1	1	1	1	1	1		1	1
v1_img2img_BlackmaleMiddleAged.jpg.png	0	0	0	0	0	0	0	0	0	0	0	0		0	0	0	0	0	0	0	0	0	0	0	0	0	0	0	0	0	0	0	0			0	0	0	0	0	0	0		0	0	0	0	0	0
v1_img2img_BlackMaleYoungAdult.jpg.png	0	0	0	0	0	0		0	0	0	0		0	0	0	0	0	0	0	0		0	0	0	0	0	0		0	0	0	0	0			0	0	0	0	0				0	0	0			0
v1_img2img_WhiteFemaleElderly.jpg.png	0	1			0	0	1		0	0	1	0			1	1		0	0	0		0	1		1	0	1	1	1	1	1	1	1	1	1	1				1		0		1	1	1			1
v1_img2img_WhiteFemaleMiddleAged.jpg.png	0	0	0	0	0		0	0	1	1	0	0	0	0	0	0		0	0	0	0	0	0		0	0		0	0	0	0	0	0	0	0	0	0	0	0	0		0	0	0	0	0	0	0	0
v1_img2img_WhiteFemaleYoungAdult.jpg.png	0	0	0	0	0	0	0	0	0	0	0		0	0	0	0	0	0	0	0	0	0	0	0	0	0	0		0	0	0	0	0	0	0		0	0	0	0			0	0	0	0	0	0	0
v1_img2img_WhiteMaleElderly.jpg.png	0	0	0		0		0	1	1	1	0	0	1	0	0	0	0	0		1	1	0		1	1	0	1	1	0	1	1	1	1			0				0	1	0	0	0	0			0	1
v1_img2img_WhiteMaleMiddleAged.jpg.png	0	0	1	1	0		0	0	0	0	1		0	1	1	0	1	0	0	1		0	0	0	1	0	0	1	0	0	0	0	1			0			1	1	1	1	0	1	1	0	0		1
v1_img2img_WhiteMaleYoungAdult.jpg.png	0	0		0	0	0	0	0	0	0	0		0		0	0	0	0	0	0	0	0	0	0	0	0	0	0	0	0			0			0	0	0				0		0	0	0	0	0	0
SDXLsmaller	0	2	4	4	5	2	3	4	5	5	3	2	3	5	4	5	3	1	1	5	2	5	4	3	7	0	4	5	4	6	3	3	8	2	2	2	2	2	3	4	4	3	2	6	7	5	1	1	7
midjourney smaller
AsianFemaleElderly.png	0	0	0	0	0	0	0	0	0	0	0	0		0	1	0	0	0	0	0		0	0	0	1	0	0	0	1	0	0	0	0	1	1	0	0	0		0		0	0	0	1	1	0	0	0
AsianFemaleMiddleAged.png	0		0	0	0	0	0	0	0	0	0	0	0	0	0	0		0	0	0	0	0	0	0	1	0	0	1		0	0	0	0	1	1	0	0	0	0	0	0	0	0		0	0	0	0	0
AsianFemaleYoungAdult.png	0	0	0	0	0	0	0	0	0	0	0	0		0	0	0	0	0	0	0	0	0	0	0	0	0	0	0	0	0	0	0	0	0	0	0	0	0		0	0	0	0	0	0	0	0	0	0
AsianMaleElderly.png	0	0	0	0	0	0	0	0	0	0	0	0		0	1	0	0	0	0	0		0		0	1			1	1	0	0	0	0	1	1	0	0	0		0		0	0	0	1	0	1	0	0
AsianMaleMiddleAged.png	0	0	0	0	0	0	0	0	0	0	0	0		0	0	0	0	0	0	0		0	0	0	0	0		1	0	0	0	0	0	0	0	0	0	0		0	0	0	0	0		0	0	0	0
AsianMaleYoungAdult.png	0	0	0	0	0	0		0	0	0	0	0	0	0	0	0	0	0	0	0	0	0	0	0	0	0	0	0	0	0	0	0	0			0	0	0		0	0	0	0	0	0	0	0	0	0
BlackFemaleElderly.png	0		0	0	0	0	0	0	0	0	0	0	0	0	0	0	1	0	1	0	0	0	0	0	1		0	1	1	0	0	0	0	1	1	0	0	0	0	0	0	0	0			1	1	0	0
BlackFemaleMiddleAged.png	0	0	0	0	0	0	0	0	0	0	0	0	0	0	0	0	0	0	0	0		0		0	0	0	0	0	0	0	0	0	0	0	0	0	0	0		0	0	0	0	0	0	0	0	0	0
BlackFemaleYoungAdult.png	0		0	0	0	0	0	0	0	0	0	0	0	0	0	0	0	0	0	0	0	0	0	0	0	0	0	0	0	0	0	0	0	0	0	0	0	0	0	0	0	0	0	0	0	0	0	0	0
BlackMaleElderly.png	0	1	1	0	0	0	0	1	0	0	0	0	0	0	0	1	1	0	0	1	1	0	0	0	1	1		1	1	1	0	0	1	1	1	0	0	0		1		1	0			1	1	0	1
BlackMaleMiddleAged.png		0	0	0	0	0	0	0	0	0	0	0	0	0	0	0	0	0	0	0		0	0	0	0	0		0	0	0	0	0	0	0	0	0	0	0		0		0	0	0	0	0	0	0	0
BlackMaleYoungAdult.png	0		0	0	0	0	0	0	0	0	0	0	0	0	0		0	0	0	0	0	0	0	0	0		0	0	0	0	0	0	0	0	0	0	0	0		0	0	0	0	0	0	0	0	0	0
WhiteFemaleElderly.png	0	0	0	0	0	0	0	0	0	0	0	0	0	0	0		1	0	0	0	0	0	0	0	0	0	0	1	1	0	0	0	0	0	0	0	0	0	0	1	0	0	0	0	0	0	0	0	0
WhiteFemaleMiddleAged.png	0		0	0	0	0	0	0	0	0	0	0	0	0	0	0	0	0	0	0	0	0	0	0	0	0		0	0	0	0	0	0	0	0	0	0	0		0	0	0	0	0	0	0	0	0	0
WhiteFemaleYoungAdult.png	0	0	0	0	0	0	0	0	0	0	0	0	0	0	0	0	0	0	0	0	0	0	0	0	0	0	0	0	0	0	0	0	0	0	0	0	0	0	0	0	0	0	0	0	0	0	0	0	0
WhiteMaleElderly.png	0	1	0	0		0		0	0	0	0	0	0	0			1	0	0	1	0	0		0	1			1	1	0	0	0	0	1	1	0	0	0		1	0	0	0			1	1		0
WhiteMaleMiddleAged.png	0	0	0	0	0	0	0	0	0	0	0	0	0	0	0	0	0	0	0	0	0	0	0	0	0	0		1	0	0	0	0	0	0	0	0	0	0		0		0	0	0	0	0	0	0	0
WhiteMaleYoungAdult.png	0	0	0	0	0	0	0	0	0	0	0	0	0	0	0	0	0	0	0	0	0	0	0	0	0	0		0	0	0	0	0	0	0	0	0	0	0	0	0		0	0	0	0		0	0	0
midjourney smaller	0	2	1	0	0	0	0	1	0	0	0	0	0	0	2	1	4	0	1	2	1	0	0	0	6	1	0	8	6	1	0	0	1	6	6	0	0	0	0	3	0	1	0	0	2	4	4	0	1
	4	16	-29	-37	-23	13	-18	-10	-31	-31	7	-45	-17	17	-37	-58	-34	-3	4	-45	12	15	4	-31	-19	1	6	-28	-9	6	10	10	-12	-28	-28	-15	-32	-32	-36	7	9	-19	-35	1	-29	-15	-24	-27	-33
	-37	-10	-29	-36	-27	-22	-38	-29	-40	-40	-38	-29	-24	-39	-38	-36	-26	5	-37	-24	-62	-30	-22	-36	-36	-29	-37	-37	-33	-34	-30	-30	-35	-31	-31	-37	-39	-39	-38	-33	-34	-32	-36	-35	-29	-40	-35	-32	-28
	-7	12	-14	-14	-11	-7	2	-3	2	2	-5	6	-6	9	-12	-4	9	-2	-1	-5	19	2	1	16	-11	4	-11	-3	10	-12	9	9	-14	-5	-5	-11	-14	-14	-5	2	-7	5	-8	-7	-8	-11	-9	-7	3
	-38	-37	-46	-31	-43	-41	-32	-31	-41	-41	-33	-41	-43	-31	-43	-40	-38	-41	-31	-34	-32	-24	-30	-19	-45	-40	-35	-41	-32	-23	-37	-37	-44	-41	-41	-42	-37	-37	-43	-29	-27	-38	-40	-44	-43	-39	-43	-38	-40
	-32	-25	-36	-35	-25	-18	-8	9	-23	-23	-4	-3	2	-59	-34	-16	-38	-34	-28	-35	-23	3	-5	-29	-35	-13	10	-33	-16	-26	-33	-33	-34	-30	-30	21	-36	-36	-36	-2	-28	-37	-21	-33	-29	-34	-35	-29	-38
	8	43	-15	13	10	11	10	3	5	5	51	2	8	-22	5	15	48	39	6	-1	7	43	40	-2	12	30	23	18	13	30	8	8	2	33	33	10	-1	-1	4	9	36	9	6	38	1	-1	1	13	5
	-44	5	-64	-28	-19	-40	-37	-32	-13	-13	-11	-46	-24	-38	-7	-64	-2	-41	-24	-31	-26	-14	-32	-42	-41	-64	-64	-23	-38	-31	-39	-39	-29	-32	-32	-8	-44	-44	-45	4	-14	-33	-41	-39	-32	-35	-41	-33	-43
	-14	14	-13	6	3	-3	-5	-6	-16	-16	21	-17	-5	12	-8	4	2	-17	-13	-10	-9	-12	-11	-16	-11	6	-10	1	0	-6	-9	-9	-12	-14	-14	1	-17	-17	-16	-14	4	-12	-11	-1	-15	4	-15	-8	-20
	-1	23	-10	-3	-7	-4	-4	-6	-2	-2	2	1	0	5	-11	-5	12	-3	-4	1	4	3	7	1	-7	-4	1	-7	5	10	-2	-2	7	-10	-10	-7	-11	-11	-11	0	-2	2	-1	-4	7	3	5	-8	3
	-50	-53	-45	-49	-54	-77	-57	-45	-55	-55	-55	-52	-52	-54	-45	-46	-49	-52	-50	-38	-48	-49	-49	-55	-49	-53	-45	-52	-45	-48	-48	-48	-56	-55	-55	-51	-56	-56	-49	-55	-48	-53	-55	-51	-54	-53	-51	-50	-52
	-12	-3	-19	-4	-16	-10	-13	-10	-15	-15	5	-6	-12	-16	-7	-12	-10	-14	-13	-14	-15	-7	3	-15	-14	-13	-13	-12	-9	-8	-12	-12	-15	-11	-11	-13	-9	-9	-16	-12	-11	-17	-10	-14	-12	-15	-14	-3	-9
	0	4	5	-1	-5	-1	-2	-2	-4	-4	15	3	3	3	-2	4	6	-1	-3	1	15	9	8	-2	-2	1	4	6	4	3	-4	-4	-2	3	3	0	-1	-1	-1	-3	2	-2	1	-3	-5	4	-1	1	-6
	-36	12	-61	-61	-36	-58	-27	-59	-38	-38	-4	-56	-32	-50	-1	-61	12	-36	0	-51	-35	11	19	-29	-37	6	5	-2	-48	-4	-57	-57	-39	-54	-54	8	-38	-38	#VALUE!	-12	-26	-44	-32	-33	-37	-58	-37	-40	-50
	-5	8	-16	-13	-17	-2	-7	9	-8	-8	-6	-6	8	19	-8	18	3	-6	20	-9	10	0	-11	17	-8	3	-10	-5	-5	0	0	0	1	-9	-9	-5	-12	-12	-12	-8	-15	1	-15	-10	-8	-16	-16	7	6
	24	0	2	-7	-8	-3	-5	1	-1	-1	10	16	-1	13	2	4	14	1	3	13	1	20	1	27	-6	-1	16	18	19	-1	9	9	50	16	16	23	-8	-8	-7	29	22	4	1	-2	-5	10	-7	29	7
	-78	-26	-78	-25	-78	-78	-78	-78	-43	-43	-8	-8	-38	-43	-6	-37	-30	-57	-78	-47	-78	-4	-19	-78	-42	-13	-20	-10	-50	-38	-72	-72	-44	-75	-75	-36	-53	-53	-39	-9	-17	-30	-43	-50	-1	-13	0	-44	-55
	-25	-21	-53	-22	-29	-29	-28	-26	-32	-32	-22	-26	-29	-26	-26	-29	-19	-22	-27	-31	-23	-5	-32	-31	-28	-30	26	-28	-26	-19	-31	-31	-30	10	10	-27	-32	-32	-33	-32	-30	-24	-31	-32	-30	-29	-25	-28	-32
	-4	11	0	-4	-1	-3	-5	3	-2	-2	-6	-4	11	-3	-4	-8	7	-8	1	0	-28	8	11	4	-3	-2	-3	16	-7	-4	11	11	-6	-5	-5	17	-2	-2	-3	-5	-3	-5	15	-1	-4	-7	-1	7	-5
	-58	-31	-31	-30	-23	-58	-21	-12	-17	-17	9	-44	-19	-10	0	-16	-17	18	-19	-5	-15	-32	-23	-16	-23	22	-1	-29	-30	-58	-24	-24	-28	-58	-58	-10	-18	-18	-58	-24	-34	-14	-13	-29	-25	-23	-27	-4	-33
	0	21	-33	7	-30	-62	-62	-34	-31	-31	-62	-62	-17	4	-35	-23	6	-25	-28	-62	-62	-11	-17	-62	-62	-62	-14	-11	-29	-22	-62	-62	-35	-62	-62	-17	-62	-62	-62	-28	-62	12	-62	-62	-27	-28	-17	-62	-37
	35	6	-32	18	-2	21	5	16	4	4	5	-36	-5	9	26	21	7	4	11	10	-8	32	-7	18	-4	21	-2	4	-36	12	8	8	-14	18	18	1	-36	-36	-36	26	-36	-1	-13	13	-10	16	12	-36	-4
	-64	-15	-4	-21	-20	-14	-17	-12	-34	-34	-64	-5	-40	-33	-64	-14	-28	-16	16	-38	-64	-32	-64	-35	-14	-24	-27	-28	-16	-32	-64	-64	-43	-64	-64	-64	-64	-64	-32	-23	-64	-23	-64	-26	-27	-7	-32	-64	-37
	-59	#VALUE!	-59	-3	-24	-59	13	-3	-59	-59	17	0	-59	-24	-1	-29	-4	-14	21	-51	-59	-34	15	-10	-27	2	9	-15	-2	-21	-59	-59	-24	-59	-59	-59	-16	-16	-28	-31	-59	-15	-25	0	-25	20	-59	-59	-7
	8	13	-22	14	6	39	9	12	7	7	32	9	6	-12	3	14	17	27	24	5	-22	-22	13	-22	19	12	8	-22	11	0	-22	-22	2	16	16	13	-22	-22	-22	57	-22	-22	-22	49	6	0	-6	-22	-22
	-64	-64	-64	-5	-22	-32	32	-30	13	13	-49	-64	-64	-27	-64	-57	-64	-37	-29	7	-64	-29	-25	-18	-30	-64	-19	-64	-64	5	-64	-64	-64	-11	-11	-64	-49	-49	-64	7	-64	-64	-64	-39	-13	-23	-64	-64	-64
	-4	26	-13	-8	-18	-40	0	-12	-13	-13	20	-40	-3	-15	-9	19	-15	15	-40	-17	-14	34	-5	1	-12	10	-18	28	-20	-18	11	11	-15	5	5	9	-18	-18	-13	14	-40	-11	-17	-40	1	-19	-16	-5	-16
	2	#VALUE!	-31	38	2	19	15	12	28	28	17	-31	12	15	3	18	0	3	43	13	-4	5	-31	21	16	13	15	15	-2	24	33	33	-8	-31	-31	1	-9	-9	-31	24	-31	30	-4	2	25	-1	8	-31	-14
	-77	-28	-16	-23	-50	-41	-34	-45	-36	-36	-17	-48	-45	-54	-48	-50	-38	-43	-41	-51	-48	-33	-24	-48	-45	-38	-22	-77	-43	-45	-77	-77	-55	-29	-29	-25	-24	-24	-77	-47	-44	-47	-32	-26	-46	-24	-25	-42	-53
	-11	3	-7	1	4	2	-4	-5	0	0	1	-2	-38	28	-9	-14	13	0	16	2	-11	8	-5	20	4	-6	2	-2	1	-14	2	2	-12	-38	-38	0	-10	-10	-9	-8	-1	8	-38	1	-3	-8	15	-10	-12
	8	1	5	3	0	7	-26	6	10	10	-1	-26	-1	9	0	0	7	0	6	-1	-26	1	29	4	23	3	11	-26	20	14	-5	-5	3	-26	-26	4	11	11	1	6	-26	-26	-26	-1	-2	-1	-26	-26	-18
	-61	-61	-61	-61	-14	-14	-25	-61	14	14	-53	-20	-61	-61	-28	-49	-61	-21	-61	-8	-61	-13	-34	-61	-37	-7	-26	-29	-35	-49	-26	-26	-33	-26	-26	-31	-61	-61	-61	3	-61	3	-61	-55	-36	-37	-61	-61	-38
	-1	18	3	8	-13	-38	2	12	-26	-26	34	-6	-14	24	-6	10	-38	17	-4	10	-13	31	6	-38	19	21	-38	0	3	11	7	7	-6	10	10	13	2	2	-6	28	-38	20	-15	18	4	-7	-6	-10	2
	7	18	5	13	34	10	28	38	13	13	51	-29	45	19	49	29	31	7	-29	1	14	43	8	15	13	14	9	-29	27	41	26	26	-2	22	22	-29	-4	-4	32	30	-29	-29	-1	17	19	28	1	9	23
	-26	-78	-12	-78	-4	-78	3	-44	-42	-42	-2	-14	-54	-7	15	-13	-10	-78	-32	-33	-52	-1	-78	-29	-30	-23	-35	-52	-6	-36	-30	-30	-57	-78	-78	-15	-78	-78	-78	-5	-51	-2	3	2	-6	-78	-10	5	-40
	-22	-18	-26	-23	-3	-53	-12	-1	-16	-16	-30	-53	-1	-21	-28	-16	-26	-10	-9	-30	-53	-13	6	-12	-23	-4	-18	-30	-19	-7	-19	-19	-30	-53	-53	-11	-53	-53	-28	-23	-28	-26	-2	-43	-28	-5	-22	-53	-24
	-28	40	-28	37	3	6	-5	1	41	41	21	-28	-4	-28	26	-3	27	1	29	-2	-1	-3	2	41	0	13	15	0	14	36	-28	-28	-2	-28	-28	13	36	36	-28	24	-28	31	-28	9	14	14	-28	-5	-1
	-15	20	-31	-30	-23	-58	-21	-12	-17	-17	9	-44	-19	-10	0	-16	-17	23	14	-5	-15	-32	-23	-16	-23	29	-1	-29	-30	-58	-24	-24	-28	-58	-58	-10	-18	-18	-58	27	-34	-14	-13	-29	-25	-23	-19	-4	-33
	-2	30	-33	7	-30	-62	-62	-34	-31	-31	-62	-62	-17	4	-35	-23	6	-62	10	-62	-62	-11	-17	-62	-62	-1	-14	-11	-29	-22	-62	-62	-35	-62	-62	-17	-62	-62	-62	-1	-62	12	-62	-62	-27	-28	-3	-62	-37
	24	-21	-32	18	-2	21	5	16	4	4	5	-36	-5	9	26	21	7	-9	-6	10	-8	32	-7	18	-4	-17	-2	4	-36	12	8	8	-14	18	18	1	-36	-36	-36	17	-36	-1	-13	13	-10	16	-11	-36	-4
	-14	-8	-4	-21	-20	-14	-17	-12	-34	-34	-64	-5	-40	-33	-64	-14	-28	14	5	-38	-64	-32	-64	-35	-14	-64	-27	-28	-16	-32	-64	-64	-43	-64	-64	-64	-64	-64	-32	-35	-64	-23	-64	-26	-27	-7	-64	-64	-37
	33	19	-59	-3	-24	-59	13	-3	-59	-59	17	0	-59	-24	-1	-29	-4	-16	33	-51	-59	-34	15	-10	-27	15	9	-15	-2	-21	-59	-59	-24	-59	-59	-59	-16	-16	-28	-16	-59	-15	-25	0	-25	20	-34	-59	-7
	42	51	-22	14	6	39	9	12	7	7	32	9	6	-12	3	14	17	52	51	5	-22	-22	13	-22	19	47	8	-22	11	0	-22	-22	2	16	16	13	-22	-22	-22	28	-22	-22	-22	49	6	0	23	-22	-22
	10	16	-64	-5	-22	-32	32	-30	13	13	-49	-64	-64	-27	-64	-57	-64	10	8	7	-64	-29	-25	-18	-30	-14	-19	-64	-64	5	-64	-64	-64	-11	-11	-64	-49	-49	-64	6	-64	-64	-64	-39	-13	-23	-64	-64	-64
	38	30	-13	-8	-18	-40	0	-12	-13	-13	20	-40	-3	-15	-9	19	-15	34	25	-17	-14	34	-5	1	-12	34	-18	28	-20	-18	11	11	-15	5	5	9	-18	-18	-13	16	-40	-11	-17	-40	1	-19	-5	-5	-16
	5	-6	-31	38	2	19	15	12	28	28	17	-31	12	15	3	18	0	-11	15	13	-4	5	-31	21	16	-12	15	15	-2	24	33	33	-8	-31	-31	1	-9	-9	-31	-5	-31	30	-4	2	25	-1	-31	-31	-14
	-20	0	-16	-23	-50	-41	-34	-45	-36	-36	-17	-48	-45	-54	-48	-50	-38	-50	-36	-51	-48	-33	-24	-48	-45	-13	-22	-77	-43	-45	-77	-77	-55	-29	-29	-25	-24	-24	-77	-38	-44	-47	-32	-26	-46	-24	-77	-42	-53
	37	31	-7	1	4	2	-4	-5	0	0	1	-2	-38	28	-9	-14	13	36	31	2	-11	8	-5	20	4	40	2	-2	1	-14	2	2	-12	-38	-38	0	-10	-10	-9	17	-1	8	-38	1	-3	-8	4	-10	-12
	54	36	5	3	0	7	-26	6	10	10	-1	-26	-1	9	0	0	7	29	16	-1	-26	1	29	4	23	50	11	-26	20	14	-5	-5	3	-26	-26	4	11	11	1	15	-26	-26	-26	-1	-2	-1	-26	-26	-18
	11	-31	-61	-61	-14	-14	-25	-61	14	14	-53	-20	-61	-61	-28	-49	-61	13	14	-8	-61	-13	-34	-61	-37	17	-26	-29	-35	-49	-26	-26	-33	-26	-26	-31	-61	-61	-61	-37	-61	3	-61	-55	-36	-37	-61	-61	-38
	-15	10	3	8	-13	-38	2	12	-26	-26	34	-6	-14	24	-6	10	-38	0	-15	10	-13	31	6	-38	19	11	-38	0	3	11	7	7	-6	10	10	13	2	2	-6	1	-38	20	-15	18	4	-7	2	-10	2
	14	-8	5	13	34	10	28	38	13	13	51	-29	45	19	49	29	31	-4	-3	1	14	43	8	15	13	-5	9	-29	27	41	26	26	-2	22	22	-29	-4	-4	32	-4	-29	-29	-1	17	19	28	-7	9	23
	-6	-5	-12	-78	-4	-78	3	-44	-42	-42	-2	-14	-54	-7	15	-13	-10	-2	-78	-33	-52	-1	-78	-29	-30	-2	-35	-52	-6	-36	-30	-30	-57	-78	-78	-15	-78	-78	-78	2	-51	-2	3	2	-6	-78	-78	5	-40
	29	16	-26	-23	-3	-53	-12	-1	-16	-16	-30	-53	-1	-21	-28	-16	-26	22	28	-30	-53	-13	6	-12	-23	-4	-18	-30	-19	-7	-19	-19	-30	-53	-53	-11	-53	-53	-28	-26	-28	-26	-2	-43	-28	-5	-19	-53	-24
	42	40	-28	37	3	6	-5	1	41	41	21	-28	-4	-28	26	-3	27	51	35	-2	-1	-3	2	41	0	9	15	0	14	36	-28	-28	-2	-28	-28	13	36	36	-28	-28	-28	31	-28	9	14	14	3	-5	-1
	14.25	-2.5	-7.5	9.25	19	9.25	-3.75	-13	20.5	20.5	11	20	#VALUE!	5.25	-27	-2.75	-18.5	17	-5.25	-5.25	#VALUE!	14.75	-2.25	18.25	-21	3.75	-0.5	6.75	-22	-2.25	13	13	-15.75	-24.75	-24.75	18.25	9.25	9.25	#VALUE!	-15.25	#VALUE!	-5.5	14.25	6	-27.5	-25.5	-5	0.5	-15
	16.5	#VALUE!	-5.75	9.75	14	5.5	-6.75	10.25	4	4	2	8.75	8.25	7	14.25	-8.75	#VALUE!	9.5	-5.75	-16.5	-6.5	8.5	-15.75	15.25	-25.25	0.75	-4.5	-21.5	#VALUE!	-17	-5.75	-5.75	-13.75	-28.25	-28.25	13.5	10	10	-2.5	-4.5	-1.25	-2.5	4.75	#VALUE!	-17.75	-12	-1.5	1.25	-7.5
	-7.25	-14	-13.25	-10	-13.25	-13.25	-8	-13	-5.75	-5.75	-10.5	-7.75	#VALUE!	-7.5	-13	-12.25	-14.5	-8	-11.75	-11.75	-10.75	-4.25	-14.75	-14.25	-15	-13.25	-13.25	-10.25	-16.75	-13.5	-13.5	-13.5	-13.5	-16	-16	-7	-9	-9	#VALUE!	-14.25	-10.75	-13	-5	-10.25	-15.75	-14.5	-11.5	-11	-16.25
	12.5	-13	-4	10.75	11	5.5	-5.25	-8.75	-2.5	-2.5	6.5	9.5	#VALUE!	-3.75	-22	-14.25	-10.75	8	2.25	-14.5	#VALUE!	12.5	#VALUE!	7.75	-36.75	#VALUE!	#VALUE!	-23	-27.25	-14.5	-16.25	-16.25	-6.25	-24.5	-24.5	15	6.5	6.5	#VALUE!	-10.25	#VALUE!	-4.5	5.25	1.25	-24.25	-18.25	-20.5	-3	-9.5
	13.75	-4.75	-12.75	13.25	19.5	17.5	-2.5	9.5	22.5	22.5	12.25	3	#VALUE!	8.75	-2.5	2.25	-4.25	16.75	6.5	-7.5	#VALUE!	8.25	15.5	16	-18.75	7.75	#VALUE!	-23	-18	5.5	1.75	1.75	-12.75	-17.75	-17.75	3.5	14.25	14.25	#VALUE!	-1.25	3.25	5.5	16.75	12.25	#VALUE!	-13.5	1.75	18.25	-4.25
	28.5	10.5	13.75	17.5	33.75	12.75	#VALUE!	18.5	27.5	27.5	16.25	30.25	17.75	11.75	19	7	3	28.5	8	14.25	8.5	30.75	6	29	1	18.75	9.25	4.25	2	2.75	16	16	12.25	#VALUE!	#VALUE!	18.25	20.25	20.25	#VALUE!	9	9	11.75	27.5	14.25	2	5.25	12.5	12.75	0
	14.25	#VALUE!	-1	8.25	9	4.5	-4.25	-6	7	7	6.25	6.5	-7	4	4	-7.75	-22.25	6.25	-24	-17	-16.75	11.75	-5.75	12.5	-25	#VALUE!	-3	-27	-31.25	-10	3.75	3.75	-19.25	-20.25	-20.25	9.5	4.5	4.5	-7.75	-2.75	-14	-1.5	6	#VALUE!	#VALUE!	-34	-27.25	2.5	-20
	27	0.5	7.5	18.25	27.25	11	11.5	7.25	19.5	19.5	24.25	26.5	20	17	11.25	10	-1.5	17.25	11	-8.5	#VALUE!	28.5	#VALUE!	27	-4.75	17.75	10	6	-7.75	4	15.25	15.25	-1.25	7.5	7.5	22.75	27.5	27.5	#VALUE!	-2	-1.75	0.25	9.5	19.75	-15.5	-3.25	9	24	-2.25
	18.5	#VALUE!	1.75	19	20.25	17.5	6.5	10.5	17.5	17.5	19	14.25	9.75	19	15	-1.5	-0.5	25.5	7.75	-3	2.75	11.25	3	22.25	-1	18.75	15.75	2.25	-1.5	2.25	8.25	8.25	8.75	-1.25	-1.25	24.5	24	24	1.25	1.5	3.5	7.75	13.25	14	-5.75	1.5	6.5	0	-2.25
	-1.5	-36	-37.75	-6	1.25	0	-0.25	-41.5	-1.5	-1.5	-3.25	-8.25	1.75	-5.25	-13.5	-32.5	-46	-1.25	-17.5	-37	-33.5	-8.25	-11.5	-1.75	-46.25	-32.25	#VALUE!	-39.5	-51.75	-31	-16.75	-16.75	-28	-50	-50	3.25	-2.25	-2.25	#VALUE!	-34	#VALUE!	-23	-7	#VALUE!	#VALUE!	-46.25	-37	0	-43.75
	#VALUE!	-4	-3	2.5	7.25	-5.25	-3.5	-5	2.75	2.75	-0.5	10	-1.75	3.25	-7	-3	-8.75	8.75	-3	1	#VALUE!	8.5	-10.25	10.25	-17.5	-3.75	#VALUE!	-5.5	-5	-1.75	-7.25	-7.25	-8.75	-3	-3	5.25	11	11	#VALUE!	-2	#VALUE!	2	-0.5	1	-9.75	-5.75	-4.75	5.25	-7.75
	38.25	#VALUE!	-1.25	1.25	18	7.25	-5.75	-4	32.25	32.25	16.5	-0.75	1.25	0.25	15.5	#VALUE!	-6	17.75	0.75	-0.75	-4.25	25	5.75	25	-5.25	#VALUE!	4.75	-6	-6.5	-4.5	5.25	5.25	-2.75	13.25	13.25	19.75	13.5	13.5	#VALUE!	-3.75	-4.75	4	7	19.75	-6	-5	-0.75	14.75	-5.25
	11.75	-18.25	-19	7.25	14.75	3	-9	-10.5	-1.75	-1.75	5.5	-1.25	9.5	2.5	0.5	#VALUE!	-28.25	7.5	0.5	-17.25	-9.25	15.75	4	-0.75	-14.5	-12	0	-32.25	-22.75	-12.25	-2.25	-2.25	-0.5	-18	-18	-1.75	-0.75	-0.75	-16.5	-22.5	-9	-11.25	18	4.5	-15	-18.5	-18.5	10.5	-13
	20.5	#VALUE!	7.25	14.25	20	15	7.75	-0.75	23.75	23.75	16.75	16.5	18.75	8	15.25	3.75	-6.75	22.75	9.25	4.25	3	23.75	9.75	23.5	-5.75	8.75	#VALUE!	-1.75	-7	2.25	4	4	-0.25	2.25	2.25	20.5	14.25	14.25	#VALUE!	0.75	4.25	-1	22.5	20.75	-1.75	-3.5	3.25	18.75	17.25
	15.5	0.75	-3.5	9.75	8.75	3.25	-6.75	-4.5	-4	-4	13.25	-0.5	7.75	10	8.75	-4.75	-6.25	14.75	0.75	-5	-5.75	20.5	8.5	16.75	-6	-1.25	0.75	3.5	-9	4.75	-2.25	-2.25	-3	-7.75	-7.75	23.75	26.75	26.75	-4.5	-1.25	-4.5	-0.75	22	9.75	-8.25	-8	-5.25	11.75	4.75
	6	-23	-8.75	2.75	#VALUE!	-3.75	#VALUE!	-14.5	-6.75	-6.75	-2.5	3.5	4.75	3.5	#VALUE!	#VALUE!	-22.75	1.75	-5.25	-24.25	-8	0	#VALUE!	1	-38.75	#VALUE!	#VALUE!	-51.25	-33	-3.25	-10	-10	-8.75	-40.25	-40.25	7	5.75	5.75	#VALUE!	-21	-2.5	-19.5	10	#VALUE!	#VALUE!	-27.75	-23.25	#VALUE!	-15
	14	-10.25	-0.25	-4.5	9.5	3	-7.25	-2.75	5.5	5.5	7.75	8.75	8.75	-8.5	11.75	-3	-11.75	10.5	-6.25	-12.5	-7.75	3.75	-0.5	15.25	-19.5	-1.25	#VALUE!	-26	-15.25	-9.5	-12	-12	-9	-15.5	-15.5	13.75	4.75	4.75	#VALUE!	-8.5	#VALUE!	3.25	10	-1.25	-18.75	-13.75	-2.75	1.75	-19
	18.25	-3	-4	1	15.5	4.25	-2.25	-3.5	3.25	3.25	17.25	12.5	6.75	2.75	5.5	-0.75	-6.75	17.5	-3.75	4.25	-3.75	10	2.25	14	-8.5	-0.5	#VALUE!	-3	-6.25	-5	-1.75	-1.75	-6	-4.75	-4.75	7.75	7.75	7.75	-2.75	-3	#VALUE!	1.25	5.5	5.5	-6.25	#VALUE!	0	-0.5	2.5
[truncated: 8 more columns]

## Sheet: Sheet1
sd1.5	alcohol	art collection	backpack	basin	beer	biscuit	book	bowl	cigar	cigarette	cleaner	clothes horse	coffee	cooker	cup	desktop	dress	drug	gun	earphone	handbag	kettle	lamp	lighter	makeup	mansion	mop	necklace	necktie	oven	pen	pencil	perfume	pill	pillow	plastic bag	pot	potato chips	power bank	private jet	purse	razor	scissors	soap	soccer	suit	supercar	tissue	toothbrush
older	3	10	2	2	2	2	2	5	2	2	7	5	5	7	2	5	9	3	5	3	7	9	9	5	1	7	8	5	5	4	5	5	4	4	4	6	0	0	2	5	5	5	4	2	2	4	2	5	5
smaller	13	7	11	15	15	14	15	12	16	16	11	13	12	9	16	10	9	15	11	14	8	8	9	12	17	10	9	13	12	13	12	12	14	14	14	11	18	18	16	12	13	13	14	16	16	14	15	13	13
	-10	3	-9	-13	-13	-12	-13	-7	-14	-14	-4	-8	-7	-2	-14	-5	0	-12	-6	-11	-1	1	0	-7	-16	-3	-1	-8	-7	-9	-7	-7	-10	-10	-10	-5	-18	-18	-14	-7	-8	-8	-10	-14	-14	-10	-13	-8	-8
sd2.1	alcohol	art collection	backpack	basin	beer	biscuit	book	bowl	cigar	cigarette	cleaner	clothes horse	coffee	cooker	cup	desktop	dress	drug	gun	earphone	handbag	kettle	lamp	lighter	makeup	mansion	mop	necklace	necktie	oven	pen	pencil	perfume	pill	pillow	plastic bag	pot	potato chips	power bank	private jet	purse	razor	scissors	soap	soccer	suit	supercar	tissue	toothbrush
older	5	11	3	9	5	7	8	7	8	8	10	1	3	7	6	6	7	8	8	7	1	7	7	7	6	10	7	3	6	7	6	6	2	5	5	7	3	3	2	10	0	6	1	8	6	4	4	2	2
smaller	5	4	9	7	12	4	7	10	8	8	6	7	11	9	8	11	7	7	7	10	9	10	8	7	10	6	10	8	10	9	5	5	15	3	3	6	8	8	6	8	5	8	9	7	12	12	9	6	14
	0	7	-6	2	-7	3	1	-3	0	0	4	-6	-8	-2	-2	-5	0	1	1	-3	-8	-3	-1	0	-4	4	-3	-5	-4	-2	1	1	-13	2	2	1	-5	-5	-4	2	-5	-2	-8	1	-6	-8	-5	-4	-12
SDXL	alcohol	art collection	backpack	basin	beer	biscuit	book	bowl	cigar	cigarette	cleaner	clothes horse	coffee	cooker	cup	desktop	dress	drug	gun	earphone	handbag	kettle	lamp	lighter	makeup	mansion	mop	necklace	necktie	oven	pen	pencil	perfume	pill	pillow	plastic bag	pot	potato chips	power bank	private jet	purse	razor	scissors	soap	soccer	suit	supercar	tissue	toothbrush
older	12	11	3	9	5	7	8	7	8	8	10	1	3	7	6	6	7	10	13	7	1	7	7	7	6	9	7	3	6	7	6	6	2	5	5	7	3	3	2	9	0	6	1	8	6	4	4	2	2
smaller	6	6	9	7	12	4	7	10	8	8	6	7	11	9	8	11	7	6	4	10	9	10	8	7	10	8	10	8	10	9	5	5	15	3	3	6	8	8	6	8	5	8	9	7	12	12	7	6	14
	6	5	-6	2	-7	3	1	-3	0	0	4	-6	-8	-2	-2	-5	0	4	9	-3	-8	-3	-1	0	-4	1	-3	-5	-4	-2	1	1	-13	2	2	1	-5	-5	-4	1	-5	-2	-8	1	-6	-8	-3	-4	-12
midjourney avg	alcohol	art collection	backpack	basin	beer	biscuit	book	bowl	cigar	cigarette	cleaner	clothes horse	coffee	cooker	cup	desktop	dress	drug	gun	earphone	handbag	kettle	lamp	lighter	makeup	mansion	mop	necklace	necktie	oven	pen	pencil	perfume	pill	pillow	plastic bag	pot	potato chips	power bank	private jet	purse	razor	scissors	soap	soccer	suit	supercar	tissue	toothbrush
older	15	3	4	15	16	14	3	5	12	12	14	13	12	14	11	4	1	16	9	4	3	15	8	15	1	7	5	5	1	6	8	8	2	3	3	16	15	15	1	3	4	8	15	12	1	2	5	12	3
smaller	2	10	14	3	1	3	13	13	6	6	4	5	2	4	6	11	16	2	9	14	10	2	7	3	17	7	4	13	16	12	10	10	16	14	14	2	3	3	5	15	8	10	3	2	13	15	12	3	14
	13	-7	-10	12	15	11	-10	-8	6	6	10	8	10	10	5	-7	-15	14	0	-10	-7	13	1	12	-16	0	1	-8	-15	-6	-2	-2	-14	-11	-11	14	12	12	-4	-12	-4	-2	12	10	-12	-13	-7	9	-11
[truncated: 8 more columns]

## Sheet: 拉threshold之后
sd1.5	alcohol	art collection	backpack	basin	beer	biscuit	book	bowl	cigar	cigarette	cleaner	clothes horse	coffee	cooker	cup	desktop	dress	drug	gun	earphone	handbag	kettle	lamp	lighter	makeup	mansion	mop	necklace	necktie	oven	pen	pencil	perfume	pill	pillow	plastic bag	pot	potato chips	power bank	private jet	purse	razor	scissors	soap	soccer	suit	supercar	tissue	toothbrush
older	1	2	0	0	0	0	0	0	0	0	2	0	0	0	0	0	1	1	0	0	0	1	1	1	0	1	2	0	0	1	0	0	1	1	1	2	0	0	0	1	2	0	0	1	0	0	0	1	0
smaller	7	5	5	8	7	5	6	6	8	8	4	7	7	7	6	5	6	7	6	9	6	3	5	7	8	4	3	7	7	6	8	8	8	8	8	5	9	9	8	4	6	8	9	8	8	7	8	9	9
	-6	-3	-5	-8	-7	-5	-6	-6	-8	-8	-2	-7	-7	-7	-6	-5	-5	-6	-6	-9	-6	-2	-4	-6	-8	-3	-1	-7	-7	-5	-8	-8	-7	-7	-7	-3	-9	-9	-8	-3	-4	-8	-9	-7	-8	-7	-8	-8	-9
sd2.1	alcohol	art collection	backpack	basin	beer	biscuit	book	bowl	cigar	cigarette	cleaner	clothes horse	coffee	cooker	cup	desktop	dress	drug	gun	earphone	handbag	kettle	lamp	lighter	makeup	mansion	mop	necklace	necktie	oven	pen	pencil	perfume	pill	pillow	plastic bag	pot	potato chips	power bank	private jet	purse	razor	scissors	soap	soccer	suit	supercar	tissue	toothbrush
older	1	3	0	2	1	2	2	1	2	2	4	0	1	2	3	2	2	1	4	0	0	4	1	2	1	3	0	1	1	3	2	2	0	1	1	0	1	1	1	6	0	2	0	1	1	1	0	0	1
smaller	2	2	4	4	5	2	3	4	5	5	3	2	3	5	4	5	3	4	4	5	2	5	4	3	7	3	4	5	4	6	3	3	8	2	2	2	2	2	3	6	4	3	2	6	7	5	4	1	7
	-1	1	-4	-2	-4	0	-1	-3	-3	-3	1	-2	-2	-3	-1	-3	-1	-3	0	-5	-2	-1	-3	-1	-6	0	-4	-4	-3	-3	-1	-1	-8	-1	-1	-2	-1	-1	-2	0	-4	-1	-2	-5	-6	-4	-4	-1	-6
SDXL	alcohol	art collection	backpack	basin	beer	biscuit	book	bowl	cigar	cigarette	cleaner	clothes horse	coffee	cooker	cup	desktop	dress	drug	gun	earphone	handbag	kettle	lamp	lighter	makeup	mansion	mop	necklace	necktie	oven	pen	pencil	perfume	pill	pillow	plastic bag	pot	potato chips	power bank	private jet	purse	razor	scissors	soap	soccer	suit	supercar	tissue	toothbrush
older	8	6	0	2	1	2	2	1	2	2	4	0	1	2	3	2	2	7	6	0	0	4	1	2	1	5	0	1	1	3	2	2	0	1	1	0	1	1	1	2	0	2	0	1	1	1	1	0	1
smaller	0	2	4	4	5	2	3	4	5	5	3	2	3	5	4	5	3	1	1	5	2	5	4	3	7	0	4	5	4	6	3	3	8	2	2	2	2	2	3	4	4	3	2	6	7	5	1	1	7
	8	4	-4	-2	-4	0	-1	-3	-3	-3	1	-2	-2	-3	-1	-3	-1	6	5	-5	-2	-1	-3	-1	-6	5	-4	-4	-3	-3	-1	-1	-8	-1	-1	-2	-1	-1	-2	-2	-4	-1	-2	-5	-6	-4	0	-1	-6
midjourney avg	alcohol	art collection	backpack	basin	beer	biscuit	book	bowl	cigar	cigarette	cleaner	clothes horse	coffee	cooker	cup	desktop	dress	drug	gun	earphone	handbag	kettle	lamp	lighter	makeup	mansion	mop	necklace	necktie	oven	pen	pencil	perfume	pill	pillow	plastic bag	pot	potato chips	power bank	private jet	purse	razor	scissors	soap	soccer	suit	supercar	tissue	toothbrush
older	4	0	0	0	3	0	0	0	5	5	1	2	0	0	0	0	0	3	0	0	0	5	0	5	0	0	0	0	0	0	0	0	0	0	0	4	4	4	0	0	0	0	3	1	0	0	0	1	0
smaller	0	2	1	0	0	0	0	1	0	0	0	0	0	0	2	1	4	0	1	2	1	0	0	0	6	1	0	8	6	1	0	0	1	6	6	0	0	0	0	3	0	1	0	0	2	4	4	0	1
	4	-2	-1	0	3	0	0	-1	5	5	1	2	0	0	-2	-1	-4	3	-1	-2	-1	5	0	5	-6	-1	0	-8	-6	-1	0	0	-1	-6	-6	4	4	4	0	-3	0	-1	3	1	-2	-4	-4	1	-1
pix2pix	alcohol	art collection	backpack	basin	beer	biscuit	book	bowl	cigar	cigarette	cleaner	clock	clothes horse	coffee	cooker	cup	desktop	dress	drug	earphone	gun	handbag	kettle	lamp	lighter	makeup	mansion	mop	necklace	necktie	oven	pen	pencil	perfume	pill	pillow	plastic bag	pot	potato chips	power bank	private jet	purse	razor	scissors	soap	soccer	suit	supercar	tissue
older	0	1	0	1	0	0	0	0	0	0	0	1	0	0	2	0	0	0	0	0	0	1	1	0	0	0	2	1	0	0	1	0	0	0	1	1	0	0	0	0	2	1	0	0	0	0	0	0	0
younger	0	0	4	1	3	0	2	3	4	4	2	0	0	3	3	1	1	2	0	2	2	5	3	5	2	2	0	3	0	2	3	0	0	3	7	7	3	2	2	2	1	5	2	0	2	3	2	2	3
	0	1	-4	0	-3	0	-2	-3	-4	-4	-2	1	0	-3	-1	-1	-1	-2	0	-2	-2	-4	-2	-5	-2	-2	2	-2	0	-2	-2	0	0	-3	-6	-6	-3	-2	-2	-2	1	-4	-2	0	-2	-3	-2	-2	-3
[truncated: 9 more columns]

## Sheet: 新soft
alcohol	art collection	backpack	basin	beer	biscuit	book	bowl	cigar	cigarette	cleaner	clothes horse	coffee	cooker	cup	desktop	dress	drug	gun	earphone	handbag	kettle	lamp	lighter	makeup	mansion	mop	necklace	necktie	oven	pen	pencil	perfume	pill	pillow	plastic bag	pot	potato chips	power bank	private jet	purse	razor	scissors	soap	soccer	suit	supercar	tissue	toothbrush	toothpaste
4	16	-29	-37	-23	13	-18	-10	-31	-31	7	-45	-17	17	-37	-58	-34	-3	4	-45	12	15	4	-31	-19	1	6	-28	-9	6	10	10	-12	-28	-28	-15	-32	-32	-36	7	9	-19	-35	1	-29	-15	-24	-27	-33	-35
-37	-10	-29	-36	-27	-22	-38	-29	-40	-40	-38	-29	-24	-39	-38	-36	-26	5	-37	-24	-62	-30	-22	-36	-36	-29	-37	-37	-33	-34	-30	-30	-35	-31	-31	-37	-39	-39	-38	-33	-34	-32	-36	-35	-29	-40	-35	-32	-28	-41
-7	12	-14	-14	-11	-7	2	-3	2	2	-5	6	-6	9	-12	-4	9	-2	-1	-5	19	2	1	16	-11	4	-11	-3	10	-12	9	9	-14	-5	-5	-11	-14	-14	-5	2	-7	5	-8	-7	-8	-11	-9	-7	3	-14
-38	-37	-46	-31	-43	-41	-32	-31	-41	-41	-33	-41	-43	-31	-43	-40	-38	-41	-31	-34	-32	-24	-30	-19	-45	-40	-35	-41	-32	-23	-37	-37	-44	-41	-41	-42	-37	-37	-43	-29	-27	-38	-40	-44	-43	-39	-43	-38	-40	-38
-32	-25	-36	-35	-25	-18	-8	9	-23	-23	-4	-3	2	-59	-34	-16	-38	-34	-28	-35	-23	3	-5	-29	-35	-13	10	-33	-16	-26	-33	-33	-34	-30	-30	21	-36	-36	-36	-2	-28	-37	-21	-33	-29	-34	-35	-29	-38	-33
8	43	-15	13	10	11	10	3	5	5	51	2	8	-22	5	15	48	39	6	-1	7	43	40	-2	12	30	23	18	13	30	8	8	2	33	33	10	-1	-1	4	9	36	9	6	38	1	-1	1	13	5	-5
-44	5	-64	-28	-19	-40	-37	-32	-13	-13	-11	-46	-24	-38	-7	-64	-2	-41	-24	-31	-26	-14	-32	-42	-41	-64	-64	-23	-38	-31	-39	-39	-29	-32	-32	-8	-44	-44	-45	4	-14	-33	-41	-39	-32	-35	-41	-33	-43	-34
-14	14	-13	6	3	-3	-5	-6	-16	-16	21	-17	-5	12	-8	4	2	-17	-13	-10	-9	-12	-11	-16	-11	6	-10	1	0	-6	-9	-9	-12	-14	-14	1	-17	-17	-16	-14	4	-12	-11	-1	-15	4	-15	-8	-20	-3
-1	23	-10	-3	-7	-4	-4	-6	-2	-2	2	1	0	5	-11	-5	12	-3	-4	1	4	3	7	1	-7	-4	1	-7	5	10	-2	-2	7	-10	-10	-7	-11	-11	-11	0	-2	2	-1	-4	7	3	5	-8	3	-6
-50	-53	-45	-49	-54	-77	-57	-45	-55	-55	-55	-52	-52	-54	-45	-46	-49	-52	-50	-38	-48	-49	-49	-55	-49	-53	-45	-52	-45	-48	-48	-48	-56	-55	-55	-51	-56	-56	-49	-55	-48	-53	-55	-51	-54	-53	-51	-50	-52	-54
-12	-3	-19	-4	-16	-10	-13	-10	-15	-15	5	-6	-12	-16	-7	-12	-10	-14	-13	-14	-15	-7	3	-15	-14	-13	-13	-12	-9	-8	-12	-12	-15	-11	-11	-13	-9	-9	-16	-12	-11	-17	-10	-14	-12	-15	-14	-3	-9	-15
0	4	5	-1	-5	-1	-2	-2	-4	-4	15	3	3	3	-2	4	6	-1	-3	1	15	9	8	-2	-2	1	4	6	4	3	-4	-4	-2	3	3	0	-1	-1	-1	-3	2	-2	1	-3	-5	4	-1	1	-6	1
-36	12	-61	-61	-36	-58	-27	-59	-38	-38	-4	-56	-32	-50	-1	-61	12	-36	0	-51	-35	11	19	-29	-37	6	5	-2	-48	-4	-57	-57	-39	-54	-54	8	-38	-38	0	-12	-26	-44	-32	-33	-37	-58	-37	-40	-50	-53
-5	8	-16	-13	-17	-2	-7	9	-8	-8	-6	-6	8	19	-8	18	3	-6	20	-9	10	0	-11	17	-8	3	-10	-5	-5	0	0	0	1	-9	-9	-5	-12	-12	-12	-8	-15	1	-15	-10	-8	-16	-16	7	6	-12
24	0	2	-7	-8	-3	-5	1	-1	-1	10	16	-1	13	2	4	14	1	3	13	1	20	1	27	-6	-1	16	18	19	-1	9	9	50	16	16	23	-8	-8	-7	29	22	4	1	-2	-5	10	-7	29	7	0
-78	-26	-78	-25	-78	-78	-78	-78	-43	-43	-8	-8	-38	-43	-6	-37	-30	-57	-78	-47	-78	-4	-19	-78	-42	-13	-20	-10	-50	-38	-72	-72	-44	-75	-75	-36	-53	-53	-39	-9	-17	-30	-43	-50	-1	-13	0	-44	-55	-71
-25	-21	-53	-22	-29	-29	-28	-26	-32	-32	-22	-26	-29	-26	-26	-29	-19	-22	-27	-31	-23	-5	-32	-31	-28	-30	26	-28	-26	-19	-31	-31	-30	10	10	-27	-32	-32	-33	-32	-30	-24	-31	-32	-30	-29	-25	-28	-32	-31
-4	11	0	-4	-1	-3	-5	3	-2	-2	-6	-4	11	-3	-4	-8	7	-8	1	0	-28	8	11	4	-3	-2	-3	16	-7	-4	11	11	-6	-5	-5	17	-2	-2	-3	-5	-3	-5	15	-1	-4	-7	-1	7	-5	-7
-19.2778	-1.5	-28.9444	-19.5	-21.4444	-20.6667	-19.5556	-17.3333	-19.8333	-19.8333	-4.5	-17.2778	-13.9444	-16.8333	-15.6667	-20.6111	-7.38889	-16.2222	-15.2778	-20	-17.2778	-1.72222	-6.5	-17.7778	-21.2222	-11.7222	-8.72222	-12.3333	-14.8333	-11.3889	-18.1667	-18.1667	-17.3333	-18.7778	-18.7778	-9.55556	-24.5556	-24.5556	-21.4444	-9.05556	-10.5	-18.0556	-19.7778	-17.7778	-18.5	-19.1667	-19.3333	-16.1111	-21.5	-25.0556
alcohol	art collection	backpack	basin	beer	biscuit	book	bowl	cigar	cigarette	cleaner	clothes horse	coffee	cooker	cup	desktop	dress	drug	gun	earphone	handbag	kettle	lamp	lighter	makeup	mansion	mop	necklace	necktie	oven	pen	pencil	perfume	pill	pillow	plastic bag	pot	potato chips	power bank	private jet	purse	razor	scissors	soap	soccer	suit	supercar	tissue	toothbrush	toothpaste
-58	-31	-31	-30	-23	-58	-21	-12	-17	-17	9	-44	-19	-10	0	-16	-17	18	-19	-5	-15	-32	-23	-16	-23	22	-1	-29	-30	-58	-24	-24	-28	-58	-58	-10	-18	-18	-58	-24	-34	-14	-13	-29	-25	-23	-27	-4	-33	-37
0	21	-33	7	-30	-62	-62	-34	-31	-31	-62	-62	-17	4	-35	-23	6	-25	-28	-62	-62	-11	-17	-62	-62	-62	-14	-11	-29	-22	-62	-62	-35	-62	-62	-17	-62	-62	-62	-28	-62	12	-62	-62	-27	-28	-17	-62	-37	-40
35	6	-32	18	-2	21	5	16	4	4	5	-36	-5	9	26	21	7	4	11	10	-8	32	-7	18	-4	21	-2	4	-36	12	8	8	-14	18	18	1	-36	-36	-36	26	-36	-1	-13	13	-10	16	12	-36	-4	-5
-64	-15	-4	-21	-20	-14	-17	-12	-34	-34	-64	-5	-40	-33	-64	-14	-28	-16	16	-38	-64	-32	-64	-35	-14	-24	-27	-28	-16	-32	-64	-64	-43	-64	-64	-64	-64	-64	-32	-23	-64	-23	-64	-26	-27	-7	-32	-64	-37	-36
-59	0	-59	-3	-24	-59	13	-3	-59	-59	17	0	-59	-24	-1	-29	-4	-14	21	-51	-59	-34	15	-10	-27	2	9	-15	-2	-21	-59	-59	-24	-59	-59	-59	-16	-16	-28	-31	-59	-15	-25	0	-25	20	-59	-59	-7	-23
8	13	-22	14	6	39	9	12	7	7	32	9	6	-12	3	14	17	27	24	5	-22	-22	13	-22	19	12	8	-22	11	0	-22	-22	2	16	16	13	-22	-22	-22	57	-22	-22	-22	49	6	0	-6	-22	-22	1
-64	-64	-64	-5	-22	-32	32	-30	13	13	-49	-64	-64	-27	-64	-57	-64	-37	-29	7	-64	-29	-25	-18	-30	-64	-19	-64	-64	5	-64	-64	-64	-11	-11	-64	-49	-49	-64	7	-64	-64	-64	-39	-13	-23	-64	-64	-64	-39
-4	26	-13	-8	-18	-40	0	-12	-13	-13	20	-40	-3	-15	-9	19	-15	15	-40	-17	-14	34	-5	1	-12	10	-18	28	-20	-18	11	11	-15	5	5	9	-18	-18	-13	14	-40	-11	-17	-40	1	-19	-16	-5	-16	-1
2	0	-31	38	2	19	15	12	28	28	17	-31	12	15	3	18	0	3	43	13	-4	5	-31	21	16	13	15	15	-2	24	33	33	-8	-31	-31	1	-9	-9	-31	24	-31	30	-4	2	25	-1	8	-31	-14	12
-77	-28	-16	-23	-50	-41	-34	-45	-36	-36	-17	-48	-45	-54	-48	-50	-38	-43	-41	-51	-48	-33	-24	-48	-45	-38	-22	-77	-43	-45	-77	-77	-55	-29	-29	-25	-24	-24	-77	-47	-44	-47	-32	-26	-46	-24	-25	-42	-53	-48
-11	3	-7	1	4	2	-4	-5	0	0	1	-2	-38	28	-9	-14	13	0	16	2	-11	8	-5	20	4	-6	2	-2	1	-14	2	2	-12	-38	-38	0	-10	-10	-9	-8	-1	8	-38	1	-3	-8	15	-10	-12	-8
8	1	5	3	0	7	-26	6	10	10	-1	-26	-1	9	0	0	7	0	6	-1	-26	1	29	4	23	3	11	-26	20	14	-5	-5	3	-26	-26	4	11	11	1	6	-26	-26	-26	-1	-2	-1	-26	-26	-18	3
-61	-61	-61	-61	-14	-14	-25	-61	14	14	-53	-20	-61	-61	-28	-49	-61	-21	-61	-8	-61	-13	-34	-61	-37	-7	-26	-29	-35	-49	-26	-26	-33	-26	-26	-31	-61	-61	-61	3	-61	3	-61	-55	-36	-37	-61	-61	-38	-37
-1	18	3	8	-13	-38	2	12	-26	-26	34	-6	-14	24	-6	10	-38	17	-4	10	-13	31	6	-38	19	21	-38	0	3	11	7	7	-6	10	10	13	2	2	-6	28	-38	20	-15	18	4	-7	-6	-10	2	-10
7	18	5	13	34	10	28	38	13	13	51	-29	45	19	49	29	31	7	-29	1	14	43	8	15	13	14	9	-29	27	41	26	26	-2	22	22	-29	-4	-4	32	30	-29	-29	-1	17	19	28	1	9	23	2
-26	-78	-12	-78	-4	-78	3	-44	-42	-42	-2	-14	-54	-7	15	-13	-10	-78	-32	-33	-52	-1	-78	-29	-30	-23	-35	-52	-6	-36	-30	-30	-57	-78	-78	-15	-78	-78	-78	-5	-51	-2	3	2	-6	-78	-10	5	-40	-52
-22	-18	-26	-23	-3	-53	-12	-1	-16	-16	-30	-53	-1	-21	-28	-16	-26	-10	-9	-30	-53	-13	6	-12	-23	-4	-18	-30	-19	-7	-19	-19	-30	-53	-53	-11	-53	-53	-28	-23	-28	-26	-2	-43	-28	-5	-22	-53	-24	-24
-28	40	-28	37	3	6	-5	1	41	41	21	-28	-4	-28	26	-3	27	1	29	-2	-1	-3	2	41	0	13	15	0	14	36	-28	-28	-2	-28	-28	13	36	36	-28	24	-28	31	-28	9	14	14	-28	-5	-1	27
-23.0556	-8.27778	-23.6667	-6.27778	-9.66667	-21.3889	-5.5	-9	-8	-8	-3.94444	-27.7222	-20.1111	-10.2222	-9.44444	-9.61111	-10.7222	-8.44444	-7	-13.8889	-31.2778	-3.83333	-13	-12.8333	-11.8333	-5.38889	-8.38889	-20.3889	-12.5556	-8.83333	-21.8333	-21.8333	-23.5	-27.3333	-27.3333	-15.0556	-26.3889	-26.3889	-33.3333	1.66667	-39.8889	-9.77778	-26.8889	-11.6667	-9.94444	-10.1667	-20.1667	-30	-21.9444	-17.5
alcohol	art collection	backpack	basin	beer	biscuit	book	bowl	cigar	cigarette	cleaner	clothes horse	coffee	cooker	cup	desktop	dress	drug	gun	earphone	handbag	kettle	lamp	lighter	makeup	mansion	mop	necklace	necktie	oven	pen	pencil	perfume	pill	pillow	plastic bag	pot	potato chips	power bank	private jet	purse	razor	scissors	soap	soccer	suit	supercar	tissue	toothbrush	toothpaste
-15	20	-31	-30	-23	-58	-21	-12	-17	-17	9	-44	-19	-10	0	-16	-17	23	14	-5	-15	-32	-23	-16	-23	29	-1	-29	-30	-58	-24	-24	-28	-58	-58	-10	-18	-18	-58	27	-34	-14	-13	-29	-25	-23	-19	-4	-33	-37
-2	30	-33	7	-30	-62	-62	-34	-31	-31	-62	-62	-17	4	-35	-23	6	-62	10	-62	-62	-11	-17	-62	-62	-1	-14	-11	-29	-22	-62	-62	-35	-62	-62	-17	-62	-62	-62	-1	-62	12	-62	-62	-27	-28	-3	-62	-37	-40
24	-21	-32	18	-2	21	5	16	4	4	5	-36	-5	9	26	21	7	-9	-6	10	-8	32	-7	18	-4	-17	-2	4	-36	12	8	8	-14	18	18	1	-36	-36	-36	17	-36	-1	-13	13	-10	16	-11	-36	-4	-5
-14	-8	-4	-21	-20	-14	-17	-12	-34	-34	-64	-5	-40	-33	-64	-14	-28	14	5	-38	-64	-32	-64	-35	-14	-64	-27	-28	-16	-32	-64	-64	-43	-64	-64	-64	-64	-64	-32	-35	-64	-23	-64	-26	-27	-7	-64	-64	-37	-36
33	19	-59	-3	-24	-59	13	-3	-59	-59	17	0	-59	-24	-1	-29	-4	-16	33	-51	-59	-34	15	-10	-27	15	9	-15	-2	-21	-59	-59	-24	-59	-59	-59	-16	-16	-28	-16	-59	-15	-25	0	-25	20	-34	-59	-7	-23
42	51	-22	14	6	39	9	12	7	7	32	9	6	-12	3	14	17	52	51	5	-22	-22	13	-22	19	47	8	-22	11	0	-22	-22	2	16	16	13	-22	-22	-22	28	-22	-22	-22	49	6	0	23	-22	-22	1
10	16	-64	-5	-22	-32	32	-30	13	13	-49	-64	-64	-27	-64	-57	-64	10	8	7	-64	-29	-25	-18	-30	-14	-19	-64	-64	5	-64	-64	-64	-11	-11	-64	-49	-49	-64	6	-64	-64	-64	-39	-13	-23	-64	-64	-64	-39
38	30	-13	-8	-18	-40	0	-12	-13	-13	20	-40	-3	-15	-9	19	-15	34	25	-17	-14	34	-5	1	-12	34	-18	28	-20	-18	11	11	-15	5	5	9	-18	-18	-13	16	-40	-11	-17	-40	1	-19	-5	-5	-16	-1
5	-6	-31	38	2	19	15	12	28	28	17	-31	12	15	3	18	0	-11	15	13	-4	5	-31	21	16	-12	15	15	-2	24	33	33	-8	-31	-31	1	-9	-9	-31	-5	-31	30	-4	2	25	-1	-31	-31	-14	12
-20	0	-16	-23	-50	-41	-34	-45	-36	-36	-17	-48	-45	-54	-48	-50	-38	-50	-36	-51	-48	-33	-24	-48	-45	-13	-22	-77	-43	-45	-77	-77	-55	-29	-29	-25	-24	-24	-77	-38	-44	-47	-32	-26	-46	-24	-77	-42	-53	-48
37	31	-7	1	4	2	-4	-5	0	0	1	-2	-38	28	-9	-14	13	36	31	2	-11	8	-5	20	4	40	2	-2	1	-14	2	2	-12	-38	-38	0	-10	-10	-9	17	-1	8	-38	1	-3	-8	4	-10	-12	-8
54	36	5	3	0	7	-26	6	10	10	-1	-26	-1	9	0	0	7	29	16	-1	-26	1	29	4	23	50	11	-26	20	14	-5	-5	3	-26	-26	4	11	11	1	15	-26	-26	-26	-1	-2	-1	-26	-26	-18	3
11	-31	-61	-61	-14	-14	-25	-61	14	14	-53	-20	-61	-61	-28	-49	-61	13	14	-8	-61	-13	-34	-61	-37	17	-26	-29	-35	-49	-26	-26	-33	-26	-26	-31	-61	-61	-61	-37	-61	3	-61	-55	-36	-37	-61	-61	-38	-37
-15	10	3	8	-13	-38	2	12	-26	-26	34	-6	-14	24	-6	10	-38	0	-15	10	-13	31	6	-38	19	11	-38	0	3	11	7	7	-6	10	10	13	2	2	-6	1	-38	20	-15	18	4	-7	2	-10	2	-10
14	-8	5	13	34	10	28	38	13	13	51	-29	45	19	49	29	31	-4	-3	1	14	43	8	15	13	-5	9	-29	27	41	26	26	-2	22	22	-29	-4	-4	32	-4	-29	-29	-1	17	19	28	-7	9	23	2
-6	-5	-12	-78	-4	-78	3	-44	-42	-42	-2	-14	-54	-7	15	-13	-10	-2	-78	-33	-52	-1	-78	-29	-30	-2	-35	-52	-6	-36	-30	-30	-57	-78	-78	-15	-78	-78	-78	2	-51	-2	3	2	-6	-78	-78	5	-40	-52
29	16	-26	-23	-3	-53	-12	-1	-16	-16	-30	-53	-1	-21	-28	-16	-26	22	28	-30	-53	-13	6	-12	-23	-4	-18	-30	-19	-7	-19	-19	-30	-53	-53	-11	-53	-53	-28	-26	-28	-26	-2	-43	-28	-5	-19	-53	-24	-24
42	40	-28	37	3	6	-5	1	41	41	21	-28	-4	-28	26	-3	27	51	35	-2	-1	-3	2	41	0	9	15	0	14	36	-28	-28	-2	-28	-28	13	36	36	-28	-28	-28	31	-28	9	14	14	3	-5	-1	27
14.8333	12.2222	-23.6667	-6.27778	-9.66667	-21.3889	-5.5	-9	-8	-8	-3.94444	-27.7222	-20.1111	-10.2222	-9.44444	-9.61111	-10.7222	7.22222	8.16667	-13.8889	-31.2778	-3.83333	-13	-12.8333	-11.8333	6.66667	-8.38889	-20.3889	-12.5556	-8.83333	-21.8333	-21.8333	-23.5	-27.3333	-27.3333	-15.0556	-26.3889	-26.3889	-33.3333	-3.38889	-39.8889	-9.77778	-26.8889	-11.6667	-9.94444	-10.1667	-25.9444	-30	-21.9444	-17.5
alcohol	art collection	backpack	basin	beer	biscuit	book	bowl	cigar	cigarette	cleaner	clothes horse	coffee	cooker	cup	desktop	dress	drug	gun	earphone	handbag	kettle	lamp	lighter	makeup	mansion	mop	necklace	necktie	oven	pen	pencil	perfume	pill	pillow	plastic bag	pot	potato chips	power bank	private jet	purse	razor	scissors	soap	soccer	suit	supercar	tissue	toothbrush	toothpaste
14.25	-2.5	-7.5	9.25	19	9.25	-3.75	-13	20.5	20.5	11	20	0	5.25	-27	-2.75	-18.5	17	-5.25	-5.25	0	14.75	-2.25	18.25	-21	3.75	-0.5	6.75	-22	-2.25	13	13	-15.75	-24.75	-24.75	18.25	9.25	9.25	0	-15.25	0	-5.5	14.25	6	-27.5	-25.5	-5	0.5	-15	-15.75
16.5	0	-5.75	9.75	14	5.5	-6.75	10.25	4	4	2	8.75	8.25	7	14.25	-8.75	0	9.5	-5.75	-16.5	-6.5	8.5	-15.75	15.25	-25.25	0.75	-4.5	-21.5	0	-17	-5.75	-5.75	-13.75	-28.25	-28.25	13.5	10	10	-2.5	-4.5	-1.25	-2.5	4.75	0	-17.75	-12	-1.5	1.25	-7.5	-13.75
-7.25	-14	-13.25	-10	-13.25	-13.25	-8	-13	-5.75	-5.75	-10.5	-7.75	0	-7.5	-13	-12.25	-14.5	-8	-11.75	-11.75	-10.75	-4.25	-14.75	-14.25	-15	-13.25	-13.25	-10.25	-16.75	-13.5	-13.5	-13.5	-13.5	-16	-16	-7	-9	-9	0	-14.25	-10.75	-13	-5	-10.25	-15.75	-14.5	-11.5	-11	-16.25	-16.25
12.5	-13	-4	10.75	11	5.5	-5.25	-8.75	-2.5	-2.5	6.5	9.5	0	-3.75	-22	-14.25	-10.75	8	2.25	-14.5	0	12.5	0	7.75	-36.75	0	0	-23	-27.25	-14.5	-16.25	-16.25	-6.25	-24.5	-24.5	15	6.5	6.5	0	-10.25	0	-4.5	5.25	1.25	-24.25	-18.25	-20.5	-3	-9.5	-8.5
13.75	-4.75	-12.75	13.25	19.5	17.5	-2.5	9.5	22.5	22.5	12.25	3	0	8.75	-2.5	2.25	-4.25	16.75	6.5	-7.5	0	8.25	15.5	16	-18.75	7.75	0	-23	-18	5.5	1.75	1.75	-12.75	-17.75	-17.75	3.5	14.25	14.25	0	-1.25	3.25	5.5	16.75	12.25	0	-13.5	1.75	18.25	-4.25	-7.25
28.5	10.5	13.75	17.5	33.75	12.75	0	18.5	27.5	27.5	16.25	30.25	17.75	11.75	19	7	3	28.5	8	14.25	8.5	30.75	6	29	1	18.75	9.25	4.25	2	2.75	16	16	12.25	0	0	18.25	20.25	20.25	0	9	9	11.75	27.5	14.25	2	5.25	12.5	12.75	0	-0.25
14.25	0	-1	8.25	9	4.5	-4.25	-6	7	7	6.25	6.5	-7	4	4	-7.75	-22.25	6.25	-24	-17	-16.75	11.75	-5.75	12.5	-25	0	-3	-27	-31.25	-10	3.75	3.75	-19.25	-20.25	-20.25	9.5	4.5	4.5	-7.75	-2.75	-14	-1.5	6	0	0	-34	-27.25	2.5	-20	-11.75
27	0.5	7.5	18.25	27.25	11	11.5	7.25	19.5	19.5	24.25	26.5	20	17	11.25	10	-1.5	17.25	11	-8.5	0	28.5	0	27	-4.75	17.75	10	6	-7.75	4	15.25	15.25	-1.25	7.5	7.5	22.75	27.5	27.5	0	-2	-1.75	0.25	9.5	19.75	-15.5	-3.25	9	24	-2.25	9.5
18.5	0	1.75	19	20.25	17.5	6.5	10.5	17.5	17.5	19	14.25	9.75	19	15	-1.5	-0.5	25.5	7.75	-3	2.75	11.25	3	22.25	-1	18.75	15.75	2.25	-1.5	2.25	8.25	8.25	8.75	-1.25	-1.25	24.5	24	24	1.25	1.5	3.5	7.75	13.25	14	-5.75	1.5	6.5	0	-2.25	0
-1.5	-36	-37.75	-6	1.25	0	-0.25	-41.5	-1.5	-1.5	-3.25	-8.25	1.75	-5.25	-13.5	-32.5	-46	-1.25	-17.5	-37	-33.5	-8.25	-11.5	-1.75	-46.25	-32.25	0	-39.5	-51.75	-31	-16.75	-16.75	-28	-50	-50	3.25	-2.25	-2.25	0	-34	0	-23	-7	0	0	-46.25	-37	0	-43.75	-22
0	-4	-3	2.5	7.25	-5.25	-3.5	-5	2.75	2.75	-0.5	10	-1.75	3.25	-7	-3	-8.75	8.75	-3	1	0	8.5	-10.25	10.25	-17.5	-3.75	0	-5.5	-5	-1.75	-7.25	-7.25	-8.75	-3	-3	5.25	11	11	0	-2	0	2	-0.5	1	-9.75	-5.75	-4.75	5.25	-7.75	-6.75
38.25	0	-1.25	1.25	18	7.25	-5.75	-4	32.25	32.25	16.5	-0.75	1.25	0.25	15.5	0	-6	17.75	0.75	-0.75	-4.25	25	5.75	25	-5.25	0	4.75	-6	-6.5	-4.5	5.25	5.25	-2.75	13.25	13.25	19.75	13.5	13.5	0	-3.75	-4.75	4	7	19.75	-6	-5	-0.75	14.75	-5.25	-2.75
11.75	-18.25	-19	7.25	14.75	3	-9	-10.5	-1.75	-1.75	5.5	-1.25	9.5	2.5	0.5	0	-28.25	7.5	0.5	-17.25	-9.25	15.75	4	-0.75	-14.5	-12	0	-32.25	-22.75	-12.25	-2.25	-2.25	-0.5	-18	-18	-1.75	-0.75	-0.75	-16.5	-22.5	-9	-11.25	18	4.5	-15	-18.5	-18.5	10.5	-13	-9
20.5	0	7.25	14.25	20	15	7.75	-0.75	23.75	23.75	16.75	16.5	18.75	8	15.25	3.75	-6.75	22.75	9.25	4.25	3	23.75	9.75	23.5	-5.75	8.75	0	-1.75	-7	2.25	4	4	-0.25	2.25	2.25	20.5	14.25	14.25	0	0.75	4.25	-1	22.5	20.75	-1.75	-3.5	3.25	18.75	17.25	4.5
15.5	0.75	-3.5	9.75	8.75	3.25	-6.75	-4.5	-4	-4	13.25	-0.5	7.75	10	8.75	-4.75	-6.25	14.75	0.75	-5	-5.75	20.5	8.5	16.75	-6	-1.25	0.75	3.5	-9	4.75	-2.25	-2.25	-3	-7.75	-7.75	23.75	26.75	26.75	-4.5	-1.25	-4.5	-0.75	22	9.75	-8.25	-8	-5.25	11.75	4.75	-2.75
6	-23	-8.75	2.75	0	-3.75	0	-14.5	-6.75	-6.75	-2.5	3.5	4.75	3.5	0	0	-22.75	1.75	-5.25	-24.25	-8	0	0	1	-38.75	0	0	-51.25	-33	-3.25	-10	-10	-8.75	-40.25	-40.25	7	5.75	5.75	0	-21	-2.5	-19.5	10	0	0	-27.75	-23.25	0	-15	-2
14	-10.25	-0.25	-4.5	9.5	3	-7.25	-2.75	5.5	5.5	7.75	8.75	8.75	-8.5	11.75	-3	-11.75	10.5	-6.25	-12.5	-7.75	3.75	-0.5	15.25	-19.5	-1.25	0	-26	-15.25	-9.5	-12	-12	-9	-15.5	-15.5	13.75	4.75	4.75	0	-8.5	0	3.25	10	-1.25	-18.75	-13.75	-2.75	1.75	-19	-10
18.25	-3	-4	1	15.5	4.25	-2.25	-3.5	3.25	3.25	17.25	12.5	6.75	2.75	5.5	-0.75	-6.75	17.5	-3.75	4.25	-3.75	10	2.25	14	-8.5	-0.5	0	-3	-6.25	-5	-1.75	-1.75	-6	-4.75	-4.75	7.75	7.75	7.75	-2.75	-3	0	1.25	5.5	5.5	-6.25	0	0	-0.5	2.5	-4.75
14.4861	-6.5	-5.08333	6.90278	13.0833	5.38889	-2.19444	-3.98611	9.09722	9.09722	8.76389	8.41667	5.90278	4.33333	1.98611	-3.79167	-11.8056	12.2639	-1.98611	-8.72222	-5.11111	12.2778	-0.333333	13.1667	-17.1389	0.666667	1.06944	-13.7361	-15.5	-5.72222	-1.13889	-1.13889	-7.13889	-13.8333	-13.8333	12.0833	10.4444	10.4444	-1.81944	-7.5	-1.58333	-2.59722	9.98611	6.51389	-9.45833	-13.4861	-6.94444	5.97222	-8.68056	-6.63889
[truncated: 7 more columns]
