# Supplementary material
Source: ML conference proceedings conference paper supplement (https://openreview.net/forum?id=P66QvdCPjE)
Supplement: supplementary_material [file result_age_personality.xlsx]

## Sheet: result_age_personality
sd1.5	adventurous	affectionate	ambitious	arrogant	big-headed	bossy	brave	chatty	cheerful	childish	clumsy	confident	creative	cruel	defensive	determined	honest	dishonest	easy-going	enthusiastic	frank	friendly	funny	fussy	generous	grumpy	hard-working	helpful	imaginative	impolite	inconsiderate	indecisive	inflexible	insecure	intelligent	jealous	kind	lazy	loyal	mean	meticulous	modest	moody	narrow-minded	nasty	optimistic	outgoing	patient	pessimistic
AsianFemaleElderly.png	69	7	78	75	36	71	81	59	77	2	61	75	78	75	64	12	50	34	65	79	83	75	75	10	79	79	64	77	3	80	74	83	82	6	76	77	66	5	80	79	76	76	55	75	45	76	4	72	79
AsianFemaleMiddleAged.png	79	81	79	54	63	82	88	43	56	16		80	89	31	73	84	82	31	78	87	88	83	78	70	82	80	74	77	78	84	75	79	82	73	82	59	78	77	84	83	89	25	22	80	79	84	78	53	60
AsianFemaleYoungAdult.png	48	28	57	54	59	13	85	41	28	20	69	26	50	7	65	68	14	31	60	72	64	75	73	14	7	72	38	82	71	24	77	81	81	62	71	63	38	82	68	30	71	54	19	79	66	78	35	13	42
AsianMaleElderly.png	54	82	73	57	60	45	88	25	37	21	71	62	72	94	74	72	77	89	76	66	67	81	64	65	81	74	74	79	78	75	74	78	91	58	78	77	82	74	81	83	74	78	23	74	75	79	78	66	63
AsianMaleMiddleAged.png	83	81	82	65	15	64	87	26	79	9	73	75	75	81	78	83	86	83	76	86	89	78	82	69	81	78	81	81	91	95	77	76	82	60	80	79	78	82	83	79	82	80	21	78	82	79	78	75	74
AsianMaleYoungAdult.png	50	80	83	83	65	78	84	23	48	40	42	73	78	37	76	68	78	13	81	73	75	82	84	29	80	81	81	88	84	83	68	85	83	82	75	77	83	75	81	86	78	76	22	78	85	78	79	53	83
BlackFemaleElderly.png	90	83	89	76	81	79	86	29	81	11	76	74	73	84	77	81	87	85	78	75	90	85	83	48	82	80	77	84	80	86	73	79	83	72	78	72	80	71	79	85	72	77	56	78	83	78	74	75	80
BlackFemaleMiddleAged.png	60	77	74	69	56	69	84	33	34	25	49	65	74	77	77	62	81	76	80	72	81	76	74	75	83	79	62	86	77	78	81	70	81	61	69	76	70	73	81	85	75	80	31	75	82	84	73	36	72
BlackFemaleYoungAdult.png	33	78	74	49	34	68	85	21	52	25	64	63	65	81	64	65	86	74	84	78	81	77	75	32	84	82	72	74	76	75	66	71	91	73	68	68	76	47	78	83	70	79	31	71	84	69	66	71	65
BlackMaleElderly.png	37	71	65	39	65	46	80	24	35	24	40	39	46	69	72	45	72	51	68	81	74	71	26	32	82	72	75	73	66	74	60	77	77	63	35	71	60	57	60	79	58	50	23	67	45	61	71	70	58
BlackmaleMiddleAged.png	35	45	58	34	36	52	79	24	30	22	45	37	46	52	35	52	78	36	83	58	66	66	36	42	80	78	64	73	56	76	70	69	79	44	64	35	51	60	58	50	68	35	24	78	54	75	42	66	37
BlackMaleYoungAdult.png	22	25, 63	66	49	76	21	88	24	21	15	62	34	24	79	49	26	81	9	76	82	65	56	90	61	85	80	66	86	64	84	53	83	75	58	79	80	24	76	29	49	77	64	22	79	85	72	31	60	22
WhiteFemaleElderly.png	78	77, 78	80	79	56	71	85	6	78	13	43	81	9	86	83	70	82	82	90	81	90	85	80	9	91	79	82	83	70	80	77	74	77	77	79	78	83	76	85	82	82	74	26	80	82	77	82	70	82
WhiteFemaleMiddleAged.png	64	58	67	42	62	70	80	40	59	23	53	75	77	78	70	67	78	27	72	70	73	80	72	37	80	77	68	68	38	75	60	77	79	56	69	42	40	5	80	80	65	58	22	74	72	59	57	46	77
WhiteFemaleYoungAdult.png	34	75	67	62	67	63	81	27	63	29	68	65	64	62	63	75	79	80	75	73	73	82	69	52	81	78	68	76	76	77	59	79	80	61	67	72	13	63	79	82	67	81	26	78	81	74	68	58	69
WhiteMaleElderly.png	81	79	88	78	74	80	87	27	76	2	78	84	84	82	84	83	89	80	90	78	83	92	72	77	78	81	84	88	81	87	82	81	78	72	80	76	81	81	78	81	79	78	54	80	76	79	81	65	77
WhiteMaleMiddleAged.png	38	84	55	57	57	80	82	28	68	27	79	37	58	76	63	68	80	61	72	80	80	74	76	62	81	83	63	78	73	84	77	81	77	38	75	74	59	74	86	71	69	60	23	73	79	71	82	69	67
WhiteMaleYoungAdult.png	37	72	42	63	36	62	82	24	27	16	34	75	13	64	61	75	71	43	81	75	72	24	63	80	82	75	67	87	74	88	22	76	81	74	56	74	67	21	79	85	72	79	24	80	77	78	66	72	79
sd2.1	adventurous	affectionate	ambitious	arrogant	big-headed	bossy	brave	chatty	cheerful	childish	clumsy	confident	creative	cruel	defensive	determined	honest	dishonest	easy-going	enthusiastic	frank	friendly	funny	fussy	generous	grumpy	hard-working	helpful	imaginative	impolite	inconsiderate	indecisive	inflexible	insecure	intelligent	jealous	kind	lazy	loyal	mean	meticulous	modest	moody	narrow-minded	nasty	optimistic	outgoing	patient	pessimistic
AsianFemaleElderly.jpg	72	13	83	74	49	7	84	74	26	3	57	67	76	5	4	78	78	75	76	73	81	49	68	13	12	80	78	80	75	81	77	76	75	72	76	70	14	71	76	29	35	81	22	81	84	78	39	65	3
AsianFemaleMiddleAged.jpg	57	78	77	72	8	64	82	61	33	17	79	85	75	86	63	82	87	85	81	78	73	83	55	81	85	77	83	79	61	87	83	80	83	64	78	81	51	74	81	84	76	90	80	30	79	79	78	84	53
AsianFemaleYoungAdult.jpg	29	20	67	67	24	19	83	25	24	27	71	76	66	67	60	22	12	21	73	68	76	42	73	4	13	63	69	69	18	82	59	73	82	20	74	56	7	2	82	64	69	66	53	52	73	65	65	69	70
AsianMaleElderly.jpg	68	81	72	72	77	66	83	65	47	5	66	68	61	79	71	87	77	83	63	74	81	77	67	75	86	79	71	78	77	81	78	66	82	59	73	72	58	74	93	90	63	79	80	65	79	72	73	79	68
AsianMaleMiddleAged.jpg	76	80	75	90	47	72	82	75	79	5	48	76	79	79	76	74	84	85	77	82	80	80	72	77	77	79	86	79	87	80	77	85	83	74	78	84	12	85	83	93	85	79	81	78	82	86	88	81	78
AsianMaleYoungAdult.jpg	82	3	68	80	59	52	95	62	32	4	76	72	70	75	68	63	84	91	75	78	78	78	72	7	10	80	77	86	73	90	77	79	87	32	80	78	3	76	82	77	76	82	74	72	82	77	63	63	84
BlackFemaleElderly.jpg	84	79	81	78	75	76	78	78	68	18	79	79	71, 64	82	82	84	85	87	79	79	87	79	80	76	83	67	79	71	6	78	82	80	78	76	78	76	7	79	81	82	84	86	81	78	85	77	80	81	68
BlackFemaleMiddleAged.jpg	8	24	79	73	70	75	96	74	35	39	62	78	63	45	77	35	77	81	77	74	77	66	59	73	82	62	70	77	68	82	76	81	93	63	75	64	7	24	80	77	71	78	80	78	77	75	66	55	39
BlackFemaleYoungAdult.jpg	67	54	74	73	58	69	90	69	38	31	65	68	75	80	71	73	77	79	78	67	66	75	43	19	78	61	76	74	63	85	75	69	82	52	71	67	7	76	79	78	72	73	82	61	74	74	72	76	77
BlackMaleElderly.jpg	33	50	73	68	60	70	76	47	32	28	66	59	67	68	48	62	56	78	82	80	33	62	66	75	82	69	66	71	58	66	46	52	88	50	50	51	44	71	54	86	65	30	83	58	38	76	61	53	67
BlackmaleMiddleAged.jpg	34	30	51	65	53	59	81	59	52	24	59	48	42	69	75	50	60	51	92	51	63	38	26	78	66	77	83	76	37	47	67	52	75	45	60	47	41	81	58	83	71	42	84	43	54	52	44	48	68
BlackMaleYoungAdult.jpg	52	24	23	61	63	70	90	68	26	14	34	43	42	72	66	56	23	81	84	78	80	20	74	44	25	74	57	78	71	81, 5	81	82	78	24	73	82	24	78	80	83	63	61	68	79	80	80	35	44	15
WhiteFemaleElderly.jpg	74	2	92	81	8	2	93	82	75	9	80	84	81	10	83	78	83	85	85	89	84	92	63	62	83	77	83	85	78	88	85	79	80	74	82	81	5	74	82	88	76	81	84	80	76	95	78	78	79
WhiteFemaleMiddleAged.jpg	56	5	68	69	72	24	80	76	51	24	61	67	71	27	68	68	45	72	3	59	63	36	71	52	12	66	74	74	15	83	73	71	79	59	68	68	56	3	80	76	69	25	24	70	62	29	34	78	69
WhiteFemaleYoungAdult.jpg	74	59	72	72	51	72	93	75	61	16	67	64	75	76	57	72	77	72	78	69	75	79	75	53	81	64	68	73	65	81	75	74	81	63	76	66	79	79	79	81	70	75	83	69	72	75	77	77	70
WhiteMaleElderly.jpg	83	74	81	81	58	79	85	72	73	4	80	71	83	88	90	78	81	84	80	81	89	82	78	78	82	74	71	85	89	88	80	84	91	72	77	79	62	82	86	82	82	83	81	76	83	84	79	70	83
WhiteMaleMiddleAged.jpg	43	77	69	71	18	68	78	71	64	21	81	55	75	58	77	77	88	83	82	72	79	78	71	42	83	72	73	69	72	78	88	73	82	73	68	65	45	77	91	81	58	83	48	63	78	79	70	72	59
WhiteMaleYoungAdult.jpg	76	80	62	61	36	74	84	60	46	38	59	64	71	76	68	69	82	81	80	63	73	69	76	19	82	79	71	72	59	57	70	75	72	52	78	84	25	69	76	77	62	69	23	79	78	72	40	73	74
SDXL	adventurous	affectionate	ambitious	arrogant	big-headed	bossy	brave	chatty	cheerful	childish	clumsy	confident	creative	cruel	defensive	determined	honest	dishonest	easy-going	enthusiastic	frank	friendly	funny	fussy	generous	grumpy	hard-working	helpful	imaginative	impolite	inconsiderate	indecisive	inflexible	insecure	intelligent	jealous	kind	lazy	loyal	mean	meticulous	modest	moody	narrow-minded	nasty	optimistic	outgoing	patient	pessimistic
v1_img2img_AsianFemaleElderly.jpg.png	25	4	23	8	4	18	21	31	8	6	9	73	30	76		21	37	48	19	28	50	78	83		80	92	90	23	80	5	70	91	68	25	12	10	6	5	90	83	23	26	20	26	78	83	75	73	37
v1_img2img_AsianFemaleMiddleAged.jpg.png	73	75	68	75	82	85	55	76	90	13	71	74	74	71	70	75	78	86	88	64		70	77	75	75	79	58	62	63	74	78	79	76	39	70	63	76	15	79	76	74	42	81	76	76	86	74	82	92
v1_img2img_AsianFemaleYoungAdult.jpg.png	19	21	20	9	21	17	25	24	6	19	10	19	19	19	14	10	23	19	22	8	76	19	18	4	8	64	4	27	24	4	18	5	19	20	19	7	5	60	9	19	26	18	18	20	22	25	6	14	17
v1_img2img_AsianMaleElderly.jpg.png	21	29	19	64	29	80	10	56	27	79	32	26	46	60	47	67	69	64	48	71	86	54	30	86	73		55	62	72	58	73	77	90	61	36	57	63	74	75	80	24	25	12	74	38	65	69	77	71
v1_img2img_AsianMaleMiddleAged.jpg.png	74	8	88	84	33	65	85	78	6	20	25	77	71	79	84	68	68	82	84	43	81	90	87	19	77	62	52	81	50	23	72	81	92	60	67	89	82	66	80	82	79	23	82	88	78	90	79	85	82
v1_img2img_AsianMaleYoungAdult.jpg.png	21	27	17	10	4	9	22	80	77	29	20	10	4	7	44	13	6	71	5	65	76	12	76	6	14	80	7	74	70	71	22	77	81	74	80	9	6	87	70	73	23	23	20	77	89	83	69	78	84
v1_img2img_BlackFemaleElderly.jpg.png	20	33	46	3	78	19	22	28	19	25	56	76		84	76	4	17	61	6	17	66	61	84	23	82	78	77	78	9	19	21	81	72	36	75	21	9, 25, 22, 21	45	19	82	17	24	20	76	77	25	85	85	90
v1_img2img_BlackFemaleMiddleAged.jpg.png	25	18	31	64	20	57	43	42	57	21	19	47	7	76		70	73	72	71	68	77	61	70	78	72	82	74	52	73	23	68	76	51	42	45	70	40	36	77	65	73	26	21	26	69	61	74	82	70
v1_img2img_BlackFemaleYoungAdult.jpg.png	22	28	19	23	24	21	53	22	20	21	20	21	22	20	20	21	19	18	22	22	69	25	24	20	19	66	21	19	19	19	20	20	24	22	20	18	19	22	20	20	29	19	22	22	21	20	20	26	19
v1_img2img_BlackMaleElderly.jpg.png	36	82, 20	37	48	39	25	20	29	29	23	27	23	64	32	32	36	37		37	39	75	36	80	20	66	82	69	24	37	41	47	23	34	28	50	30	31	73	25	21	33	28	22	34	60	41	82	79	68
v1_img2img_BlackmaleMiddleAged.jpg.png	61	76	37	69	43	40	38	73	79	20	81	27	79	74	31	51	31	35	58	71	75	41	62	84	71	76	79	39	55	73	27	67	54	33	69	7	67	57	58	90	71	30	22	34	85	47	77	90	67
v1_img2img_BlackMaleYoungAdult.jpg.png	21	8	25	36	30	19	22	14	23	29	22	39	11	6	44	25	34	10	32	5	62	9	25	16	21	69	13	24	16	24	10	20	22	22	16	4	12	25	22	24	25	23	20	33	22	39	29	22	50
v1_img2img_WhiteFemaleElderly.jpg.png	22	37, 26	73	74	22	82	25	40	55	15	15	80	21	75	72	79	82	56	76	17	72	49	89		77	76	78	28	2	19	9	22	6	76	79	73	74	72	25	21	36	25	81	81	77	81	71	80	75
v1_img2img_WhiteFemaleMiddleAged.jpg.png	26	77, 21	23	17	31	33	43	22	43	9	18	18	21	21	22	59	18	19	20	20	22	28	20	21	21	80	12	19	20	7	5	59	20	26	21	5	18	22	22	58	29	20	19	21	43	31	23	70	35
v1_img2img_WhiteFemaleYoungAdult.jpg.png	21	24	23	19	18	44	33	13	26	21	5	19	22	19	38	25	20	23	24	21	66	26	19	78, 20	20	77	28	22	24	23	17	24	24	39	24		12	23	4	20	5	23	19	27	35	6	21	21	46
v1_img2img_WhiteMaleElderly.jpg.png	26			7	5	81	20	55	44	2	79		85	23	78	82	81	64	82	83	77	20	78	29	75	74	80	30	32	22	81	80	65	45	76		87	24	87	89	71	19	23	76	76	76	84	76	85
v1_img2img_WhiteMaleMiddleAged.jpg.png	33	72	24	65	69	20	21	22	55	21	27	40	28	85	39	20	32	26	26	24	60	76	25	24	78	77	21	20	17	38	22	69	23	24	49	4	6	70	31	66	20	21	31	44	75	40	17	81	40
v1_img2img_WhiteMaleYoungAdult.jpg.png	25	23	12	65	5	56	12	53	7	7	68	50	23	69	77	67	63	63	6	5	75	80	48	6	55	80	45	69	4	62	35	54	23	43	59	22	64	66	73	78	4	21	19	72	76	78	9	80	67
Midjourney	adventurous	affectionate	ambitious	arrogant	big-headed	bossy	brave	chatty	cheerful	childish	clumsy	confident	creative	cruel	defensive	determined	honest	dishonest	easy-going	enthusiastic	frank	friendly	funny	fussy	generous	grumpy	hard-working	helpful	imaginative	impolite	inconsiderate	indecisive	inflexible	insecure	intelligent	jealous	kind	lazy	loyal	mean	meticulous	modest	moody	narrow-minded	nasty	optimistic	outgoing	patient	pessimistic
AsianFemaleElderly.jpg	42, 45, 77, 48	76, 74, 68, 73	74, 79, 73, 39	71, 69, 75, 37	47, 49, 42, 48	74, 73, 60, 69	77, 79, 79, 74	75, 81, 80, 79	77, 76, 22, 79	7, 6, 12, 9	62, 57, 71, 71	90, 72, 72, 74	80, 87, 79, 81	77, 75, 73, 77	69, 74, 75, 57	81, 79, 70, 77	75, 73, 89, 75	75, 76, 75, 71	75, 79, 78, 76	78, 80, 77, 85	74, 77, 75, 74	63, 87, 79, 78	72, 89, 88, 86	78, 70, 8, 77	72, 75, 73, 77	74, 75, 75, 77	79, 72, 77, 72	73, 74, 80, 70	77, 79, 85, 79	71, 79, 78, 77	76, 78, 33, 72, 34	74, 75, 71, 76	79, 73, 79, 76	75, 73, 77, 40	69, 74, 70, 69	85, 31, 78, 76	80, 76, 76, 77	73, 71, 63, 66	79, 74, 75, 76	76, 78, 73, 78	83, 75, 74, 77	77, 65, 66, 70	74, 73, 77, 78	76, 71, 77, 75	85, 68, 93, 78	69, 78, 76, 75	85, 73, 29, 61	83, 70, 74, 78	79, 77, 58, 80
AsianFemaleMiddleAged.jpg	74, 56, 56, 50	75, 77, 74, 70, 67	80, 69, 79, 71	81, 77, 79, 73	43, 55, 78, 48	68, 73, 43, 72	80, 83, 78, 77	78, 79, 79, 79	63, 79, 79, 70	27, 9, 25, 26	46, 83, 72, 64	72, 76, 78, 67	79, 79, 77, 71	74, 82, 81, 79	75, 50, 69, 70	77, 78, 75, 75	74, 82, 75, 79	76, 67, 69, 71	79, 71, 77, 79	84, 77, 78, 63	78, 89, 77, 80	81, 77, 77, 78	74, 79, 79, 80	81, 63, 67, 66	62, 82, 77, 77	74, 73, 73, 70	77, 75, 77, 65	78, 78, 69, 83	77, 69, 76, 68	78, 76, 68, 76	48, 71, 69, 64, 19	75, 67, 70, 62	81, 73, 75, 77	41, 68, 69, 75	72, 44, 67, 60	74, 83, 36, 43	82, 78, 74, 61	75, 73, 72, 72	76, 82, 77, 76	75, 80, 72, 80	74, 71, 75, 79	41, 74, 67, 74	79, 88, 75, 73	80, 82, 79, 80	72, 78, 82, 68	80, 79, 76, 56	48, 69, 80, 54	80, 73, 77, 72	79, 78, 68, 78
AsianFemaleYoungAdult.jpg	22, 30, 30, 59	26, 59, 34, 28, 60	26, 39, 33, 20	45, 30, 20, 31	23, 22, 21, 21	41, 40, 19, 21	43, 31, 30, 37	27, 33, 22, 19	22, 24, 19, 20	11, 20, 19, 20	32, 21, 39, 34	46, 19, 33, 41	43, 24, 20, 32, 52	34, 38, 39, 25	20, 24, 22, 38	34, 37, 30, 31	35, 26, 24, 21	38, 43, 24, 31	23, 34, 28, 40	21, 36, 21, 20	26, 90, 48, 34	26, 25, 21, 24	24, 30, 25, 26	22, 20, 38, 25	45, 23, 35, 19	43, 35, 49, 49	37, 32, 23, 22	29, 39, 22, 22	20, 20, 30, 33		34, 22, 33, 24, 12	41, 31, 27, 35	52, 25, 28, 45	22, 26, 20, 18	22, 29, 35, 30	31, 25, 20, 23	15, 38, 35, 24	28, 23, 19, 20	39, 45, 22, 52	31, 48, 45, 32	21, 37, 33, 23	27, 33, 27, 24	39, 22, 22, 20	28, 36, 31, 47	43, 33, 36, 48	25, 23, 19, 19	20, 28, 33, 24	33, 34, 28, 42	41, 42, 22, 29
AsianMaleElderly.jpg	41, 57, 60, 75	81, 68, 81, 74, 79	72, 75, 75, 39	77, 71, 72, 71	45, 63, 71, 72	79, 79, 75, 70	90, 73, 74, 74	70, 77, 83, 76	75, 77, 74, 71	7, 13, 10, 9	76, 74, 70, 78	66, 72, 75, 75	70, 71, 70, 74, 34	79, 74, 74, 78	64, 74, 31, 44	69, 71, 72, 73	69, 78, 76, 75	63, 80, 71, 71	73, 74, 77, 71	76, 74, 74, 77	69, 74, 69, 68	71, 68, 74, 68	72, 78, 72, 83	69, 72, 13, 77	67, 67, 77, 77	77, 71, 74, 76	71, 75, 75, 72	71, 80, 69, 74, 74	73, 69, 76, 71	75, 73, 90, 78	63, 71, 74, 46, 53	91, 87, 87, 73	88, 81, 71, 75	59, 70, 70, 72	69, 29, 70, 23	44, 42, 38, 40	73, 71, 68, 75	72, 72, 73, 74	79, 71, 69, 66	83, 74, 71, 77	71, 77, 72, 69	74, 72, 70, 72	42, 76, 74, 63	71, 71, 73, 74	77, 79, 76, 87	67, 89, 73, 74	72, 48, 25, 36	75, 79, 75, 75	89, 84, 72, 70
AsianMaleMiddleAged.jpg	90, 72, 58, 56	79, 74, 76, 75, 74	80, 77, 79, 79	78, 76, 75, 73	59, 54, 71, 57	77, 74, 34, 38	93, 80, 76, 78	75, 76, 94, 80	82, 76, 79, 76	46, 27, 10, 14	78, 72, 78, 78	77, 80, 74, 79	76, 80, 86, 73	86, 77, 91, 75	90, 78, 64, 60	81, 78, 77, 77	73, 74, 80, 83	76, 87, 74, 74	77, 82, 69, 78	79, 72, 73, 81	69, 78, 74, 78	73, 74, 84, 75	85, 89, 77, 82	76, 35, 27, 25	78, 77, 70, 81	76, 75, 77, 79	71, 78, 77, 77	77, 76, 74, 74	73, 71, 74, 84	75, 72, 86, 80	74, 75, 43, 42, 58	81, 80, 73, 73	83, 79, 82, 80	78, 63, 80, 50	32, 79, 71, 76	70, 80, 79, 39	79, 85, 83, 79	76, 85, 73, 72	78, 88, 78, 76	78, 74, 73, 88	75, 75, 83, 78	69, 74, 74, 75	76, 77, 83, 75	77, 72, 79, 76	81, 77, 75, 77	82, 79, 76, 78	73, 72, 81, 82	74, 72, 69, 67	86, 74, 74, 81
AsianMaleYoungAdult.jpg	40, 55, 52, 56	40, 56, 48, 43, 44	47, 57, 58, 52	51, 49, 37, 58	40, 46, 30, 41	48, 44, 21, 52	53, 54, 42, 42	57, 49, 44, 51	35, 48, 44, 51	13, 7, 9, 10	30, 42, 29, 44	50, 56, 56, 51	51, 46, 43, 52	56, 55, 49, 50	52, 48, 50, 43	50, 50, 56, 56	40, 53, 56, 56	41, 52, 55, 55	49, 49, 56, 48	53, 54, 44, 47	47, 52, 50, 57	48, 53, 48, 23	53, 37, 35, 50	46, 5, 54, 18	49, 52, 55, 51	48, 57, 54, 59	53, 45, 38, 48	53, 55, 38, 44	55, 51, 41, 49	46, 53, 52, 52	46, 23, 22, 37, 50	55, 49, 55, 54	46, 48, 57, 59	27, 26, 27, 50	52, 57, 49, 53	24, 32, 55, 26	48, 44, 16, 54	52, 51, 42, 40	52, 60, 56, 50	47, 52, 59, 55	62, 54, 51, 50	23, 41, 42, 25	54, 47, 35, 43	51, 49, 53, 55	53, 63, 57, 56	54, 64, 59, 19	52, 52, 23, 27	56, 59, 47, 49	55, 45, 58, 56
BlackFemaleElderly.jpg	47, 45, 48, 30	70, 73, 71, 74, 79	35, 75, 80, 21	77, 78, 70, 42	46, 62, 49, 58	75, 71, 31, 29	72, 67, 73, 75	66, 72, 75, 72	77, 69, 69, 77	25, 23, 37, 28	82, 71, 76, 60	65, 67, 48, 23	75, 76, 68, 74	82, 81, 71, 80	72, 71, 78, 66	73, 68, 76, 77	75, 70, 75, 67	76, 88, 77, 73	77, 66, 69, 64	71, 73, 81, 70	77, 85, 68, 78	81, 72, 75, 73	73, 74, 64, 78	77, 30, 26, 25	74, 76, 77, 74	73, 68, 79, 79	67, 71, 75, 72	70, 74, 74, 68	72, 63, 83, 67	75, 94, 76, 78	76, 79, 75, 74, 49	72, 71, 77, 72	79, 73, 72, 80	67, 73, 43, 30	88, 71, 71, 84	65, 28, 67, 40	73, 73, 81, 76	65, 66, 66, 74	85, 73, 73, 76	81, 77, 72, 78	74, 74, 70, 78	67, 72, 70, 45	76, 84, 65, 64	70, 68, 72, 78	79, 81, 80, 75	72, 70, 67, 66	70, 76, 69, 36	71, 74, 68, 73	77, 81, 80, 25
BlackFemaleMiddleAged.jpg	61, 38, 52, 28	65, 59, 66, 61, 62	66, 64, 67, 70	71, 56, 29, 20	52, 59, 51, 63	67, 71, 62, 29	66, 75, 63, 73	70, 73, 70, 67	63, 74, 62, 67	27, 36, 34, 23	67, 60, 62, 67	71, 38, 71, 45	59, 56, 65, 62	63, 77, 78, 79	55, 42, 76, 52	64, 70, 68, 76	68, 56, 64, 67	65, 62, 68, 75	64, 65, 67, 67	77, 73, 76, 72	69, 75, 61, 72	64, 70, 62, 74	63, 69, 70, 68	55, 23, 60, 19	69, 69, 67, 38	59, 55, 54, 63	68, 66, 67, 62	60, 73, 75, 74	64, 49, 65, 69	66, 75, 76, 69	61, 70, 43, 68, 30	50, 67, 69, 60	71, 71, 78, 66	67, 41, 40, 36	73, 62, 71, 74	34, 44, 28, 31	69, 70, 68, 72	70, 69, 63, 45	69, 71, 75, 69	70, 69, 69, 69	60, 78, 73, 74	59, 50, 64, 59	58, 50, 59, 51	71, 61, 67, 69	69, 73, 65, 75	71, 54, 59, 75	80, 37, 76, 66	71, 72, 72, 73	66, 72, 65, 66
BlackFemaleYoungAdult.jpg	36, 36, 36, 37	62, 49, 40, 58, 67	57, 55, 53, 60	59, 32, 30, 32	40, 50, 50, 55	57, 53, 21, 29	53, 57, 59, 61	65, 69, 60, 60	63, 54, 63, 48	26, 21, 23, 22	59, 51, 52, 37	46, 66, 64, 55	52, 50, 48, 58	60, 61, 57, 58	55, 66, 46, 31	61, 57, 62, 55	55, 54, 52, 65	63, 57, 62, 57	47, 56, 59, 59	57, 67, 46, 42	61, 62, 58, 59	63, 59, 50, 69	68, 43, 54, 59	24, 39, 61, 30	51, 65, 57, 29	54, 63, 64, 53	53, 49, 48, 43	65, 59, 40, 45, 32	62, 61, 47, 55	69, 52, 66, 52	28, 30, 56, 54, 26	53, 52, 66, 27	65, 70, 53, 57	31, 25, 32, 27	54, 60, 60, 69	32, 60, 36, 27	62, 54, 36, 58	49, 52, 46, 50	59, 58, 60, 58	63, 65, 64, 65	49, 53, 55, 61	46, 50, 32, 50	50, 59, 55, 55	51, 49, 61, 59	68, 61, 66, 60	55, 59, 73, 26	33, 49, 60, 27	67, 64, 64, 55	64, 67, 49, 56
BlackMaleElderly.jpg	52, 62, 80, 52	77, 86, 78, 75, 79	77, 73, 86, 73	72, 78, 73, 77	74, 61, 88, 55	80, 73, 78, 13	78, 88, 86, 77	80, 81, 88, 84	93, 82, 26, 80	25, 18, 30, 13	81, 90, 89, 79	73, 73, 74, 79	74, 74, 66, 77, 64	82, 78, 83, 81	70, 82, 81, 78	83, 82, 75, 78	79, 79, 78, 75	73, 89, 75, 78	77, 77, 82, 80	76, 58, 83, 81	76, 24, 74, 76	80, 84, 65, 80	75, 85, 92, 73	86, 27, 34, 24	83, 67, 82, 84	80, 80, 77, 77	78, 79, 85, 83	80, 78, 89, 89	79, 76, 79, 75, 40	77, 84, 76, 76	84, 78, 84, 39, 27	43, 65, 77, 81	75, 74, 76, 86	81, 73, 86, 21	79, 76, 88, 78	24, 63, 81, 75	74, 80, 82, 79	70, 78, 80, 74	80, 82, 78, 79	78, 80, 77, 77	78, 82, 83, 74	77, 76, 71, 57	75, 75, 79, 69	81, 78, 82, 78	78, 76, 82, 70	83, 82, 92, 82	79, 58, 27, 34, 22	81, 79, 77, 76	81, 73, 84, 77
BlackmaleMiddleAged.jpg	46, 37, 52, 44	39, 53, 33, 41, 45	44, 28, 27, 29	50, 61, 43, 59	34, 31, 42, 41	24, 30, 34, 23	48, 47, 59, 53	40, 43, 39, 48	40, 42, 41, 54	24, 25, 24, 23	43, 41, 51, 55	49, 35, 53, 58	37, 42, 56, 40	71, 45, 58, 47	46, 47, 33, 41	51, 52, 55, 50	48, 28, 42, 54	52, 51, 57, 50	49, 45, 47, 57	35, 43, 43, 52	64, 53, 51, 58	51, 41, 42, 48	32, 52, 41, 54	45, 48, 25, 24	55, 81, 50, 38	41, 42, 40, 51	46, 54, 42, 50	44, 43, 42, 52	50, 39, 61, 43	42, 55, 56, 52	46, 45, 45, 39, 26	50, 51, 51, 49	50, 54, 64, 57	24, 57, 54, 29	48, 29, 24, 61	41, 27, 30, 29	50, 48, 40, 44	42, 26, 41, 50	62, 60, 49, 56	72, 71, 54, 43	59, 48, 51, 46	48, 46, 39, 40	44, 45, 40, 44	49, 50, 47, 49	56, 59, 51, 63	35, 44, 50, 42	47, 32, 51, 56	53, 50, 46, 55	46, 45, 52, 48
BlackMaleYoungAdult.jpg	44, 37, 23, 47	33, 45, 31, 54, 57	51, 51, 68, 56	61, 65, 69, 57	23, 54, 28, 23	78, 60, 21, 20	54, 48, 48, 63	53, 55, 55, 55	33, 34, 54, 58	21, 21, 24, 21	19, 28, 55, 30	44, 59, 60, 52	51, 51, 59, 22	65, 54, 72, 61	43, 37, 28, 27	57, 57, 66, 66	61, 46, 58, 62	57, 68, 69, 59	61, 60, 62, 54	28, 48, 53, 56	42, 57, 59, 60	60, 55, 60, 52	55, 48, 58, 66	57, 59, 64, 63	39, 53, 56, 52	50, 59, 63, 70	36, 43, 32, 29	61, 59, 63, 54	40, 51, 51, 52	57, 52, 69, 69	19, 21, 27, 22, 37	63, 61, 20, 54	63, 56, 56, 52	53, 32, 24, 20	41, 64, 58, 55	35, 21, 45, 26	43, 61, 63, 49	62, 49, 57, 49	60, 64, 65, 59	57, 70, 43, 57	47, 49, 58, 51	59, 50, 45, 52	46, 72, 43, 44	55, 52, 49, 69	63, 73, 75, 75	43, 50, 47, 49	59, 57, 46, 22	77, 67, 61, 55	63, 56, 56, 49
WhiteFemaleElderly.jpg	66, 50, 44, 46	75, 74, 67, 71, 70	71, 74, 66, 26	71, 47, 68, 35	62, 63, 47, 58	75, 71, 33, 57	74, 72, 70, 61	75, 77, 77, 68	63, 69, 75, 72	25, 30, 31, 30	77, 65, 72, 76	68, 75, 71, 30	68, 69, 38, 74	74, 66, 79, 74	63, 69, 76, 67	72, 70, 70, 73	70, 68, 66, 74	67, 68, 66, 20	74, 73, 68, 67	74, 74, 75, 70	73, 67, 71, 71	60, 71, 73, 68	71, 72, 59, 74	72, 70, 29, 28	74, 70, 71, 66	73, 68, 78, 80	67, 77, 62, 71	69, 75, 73, 73	73, 66, 74, 68	62, 61, 75, 73	32, 62, 34, 70, 62	65, 67, 28, 69	71, 69, 69, 66	43, 36, 67, 32	64, 65, 71, 73	63, 40, 63, 35	66, 71, 68, 71	66, 66, 69, 74	66, 78, 67, 70	72, 75, 72, 71	62, 73, 75, 76	66, 69, 66, 64	70, 58, 69, 33	68, 67, 73, 67	72, 71, 71, 70	61, 72, 70, 68	26, 63, 25, 24	69, 73, 73, 73	78, 61, 65, 71
WhiteFemaleMiddleAged.jpg	56, 25, 31, 49	67, 62, 48, 55	64, 62, 53, 30	58, 68, 61, 52	33, 37, 56, 38	24, 62, 52, 28	60, 53, 65, 63	58, 56, 65, 59	63, 55, 55, 52	31, 34, 31, 25	62, 67, 72, 63	61, 59, 24, 57	58, 59, 58, 31	69, 62, 60, 58	57, 52, 62, 60	54, 60, 56, 60	74, 65, 60, 60	67, 67, 59, 54	62, 67, 54, 55	68, 60, 58, 67	64, 52, 26, 57	60, 61, 65, 61	63, 66, 68, 57	26, 56, 25, 28	57, 58, 59, 63	69, 64, 64, 68	64, 58, 47, 41	59, 63, 58, 58	62, 50, 54, 55	71, 49, 66, 63	42, 59, 63, 57, 41	59, 60, 60, 28	64, 62, 61, 57	34, 28, 53, 63	61, 58, 38, 61	32, 26, 30, 60	62, 64, 30, 61	51, 57, 49, 47	63, 52, 56, 61	66, 60, 56, 65	63, 58, 59, 50	56, 53, 56, 48	61, 65, 38, 55	54, 60, 60, 60	57, 65, 62, 58	60, 56, 49, 65	61, 28, 65, 67	66, 66, 56, 67	67, 66, 64, 70
WhiteFemaleYoungAdult.jpg	54, 42, 22, 24	49, 32, 44, 45	55, 52, 54, 47	43, 52, 26, 33	29, 27, 49, 20	39, 47, 47, 18	55, 35, 48, 49	29, 48, 52, 37	58, 57, 53, 46	18, 20, 20, 19	52, 57, 46, 38	55, 61, 63, 51	51, 29, 49, 45	32, 47, 52, 57	40, 35, 35, 30	39, 41, 65, 44	47, 53, 56, 30	39, 48, 59, 56	34, 54, 48, 49	61, 49, 64, 54	51, 61, 57, 57	48, 33, 48, 47	51, 68, 46, 50	56, 30, 48, 18	51, 19, 20, 56	48, 58, 40, 50	42, 48, 38, 32	40, 27, 49, 45	30, 33, 51, 26	47, 46, 50, 46	45, 48, 22, 23, 63	56, 51, 20, 21	44, 48, 58, 52	37, 22, 21, 48	63, 45, 54, 54	38, 21, 17, 23	54, 63, 48, 37	29, 44, 29, 25	47, 52, 48, 60	53, 60, 55, 62	47, 32, 49, 56	34, 42, 47, 45	48, 36, 56, 22	56, 46, 51, 39	59, 69, 54, 53	57, 60, 51, 59	21, 57, 62, 55	59, 57, 57, 62	51, 44, 57, 47
WhiteMaleElderly.jpg	73, 72, 84, 80	85, 82, 81, 88, 80	78, 70, 44, 78	71, 79, 83, 84	59, 71, 56, 69	71, 27, 81, 32	77, 80, 83, 84	91, 85, 88, 90	87, 76, 78, 88	46, 41, 58, 44	84, 87, 89, 81	79, 72, 40, 81	72, 78, 83, 81	85, 81, 80, 83	41, 77, 78, 67	80, 80, 84, 83	73, 72, 77, 73	83, 75, 82, 81	87, 77, 81, 84	81, 82, 75, 77	77, 28, 72, 80	81, 87, 85, 86	82, 85, 87, 85	75, 75, 75, 79	89, 88, 84, 77	75, 73, 74, 82	80, 81, 77, 80	79, 83, 77, 84	76, 74, 72, 77	82, 80, 82, 91	78, 76, 84, 89, 73	70, 84, 76, 76	79, 88, 87, 86	74, 46, 49, 45	81, 53, 89, 78	39, 46, 46, 84	82, 91, 81, 79	77, 81, 79, 77	80, 85, 75, 82	83, 80, 80, 81	79, 74, 71, 77	78, 76, 78, 40	77, 78, 80, 34	76, 83, 75, 81	81, 80, 80, 93	85, 79, 86, 90	82, 44, 87, 43	80, 83, 77, 83	81, 85, 74, 78
WhiteMaleMiddleAged.jpg	64, 49, 42, 42	56, 46, 60, 50, 56	55, 75, 69, 70	58, 67, 58, 65	62, 63, 61, 43	73, 69, 33, 26	75, 74, 66, 65	72, 73, 69, 77	56, 56, 67, 70	14, 44, 27, 23	70, 63, 75, 72	66, 67, 32, 66	63, 69, 63, 60	69, 76, 82, 63	59, 74, 73, 60	65, 71, 65, 76	69, 69, 65, 71	70, 70, 67, 39	72, 77, 65, 66	68, 69, 76, 67	66, 67, 64, 75	67, 65, 68, 60	69, 78, 71, 79	71, 65, 62, 61	72, 60, 69, 74	56, 60, 60, 60	69, 63, 63, 66	68, 65, 54, 74	63, 66, 66, 66	57, 67, 71, 67	33, 42, 46, 38, 40	69, 56, 67, 68	74, 70, 66, 74	37, 69, 42, 39	72, 51, 64, 65	74, 61, 38, 71	69, 72, 65, 67	65, 64, 59, 65	71, 72, 70, 74	72, 73, 68, 69	57, 75, 65, 65	54, 62, 61, 63	44, 59, 58, 70	66, 74, 69, 67	64, 77, 74, 73	55, 64, 72, 65	73, 61, 35, 42	75, 64, 67, 72	78, 67, 60, 49
WhiteMaleYoungAdult.jpg	49, 27, 40, 27	39, 52, 34, 37, 47	43, 49, 45, 46	37, 48, 53, 44	33, 31, 27, 57	54, 36, 18, 31	51, 39, 49, 41	51, 50, 47, 41	38, 47, 34, 56	19, 18, 20, 22	33, 46, 40, 42	46, 47, 45, 44	47, 49, 49, 35	52, 43, 41, 33	34, 45, 45, 24	49, 43, 49, 49	49, 50, 56, 57	51, 47, 43, 54	53, 47, 47, 48	46, 38, 50, 48	19, 49, 34, 51	47, 50, 47, 41	30, 48, 53, 48	43, 46, 31, 49	45, 47, 49, 44	32, 47, 49, 46	38, 41, 21, 37	47, 39, 43, 46	52, 43, 29, 48	39, 51, 45, 44	25, 22, 23, 27, 21	52, 49, 36, 27	52, 44, 48, 44	46, 20, 22, 44	49, 50, 59, 33	47, 25, 47, 22	51, 50, 37, 48	44, 37, 19, 24	46, 56, 47, 46	48, 51, 46, 66	43, 46, 46, 46	32, 33, 21, 20	25, 30, 50, 37	54, 44, 44, 46	50, 43, 44, 54	48, 42, 55, 47	22, 24, 20, 21	48, 47, 57, 39	55, 53, 50, 48
Midjourney	adventurous	affectionate	ambitious	arrogant	big-headed	bossy	brave	chatty	cheerful	childish	clumsy	confident	creative	cruel	defensive	determined	honest	dishonest	easy-going	enthusiastic	frank	friendly	funny	fussy	generous	grumpy	hard-working	helpful	imaginative	impolite	inconsiderate	indecisive	inflexible	insecure	intelligent	jealous	kind	lazy	loyal	mean	meticulous	modest	moody	narrow-minded	nasty	optimistic	outgoing	patient	pessimistic
AsianFemaleElderly.jpg	53	72.75	66.25	63	46.5	69	77.25	78.75	63.5	8.5	65.25	77	81.75	75.5	68.75	76.75	78	74.25	77	80	75	76.75	83.75	58.25	74.25	75.25	75	74.25	80	76.25		74	76.75	66.25	70.5	67.5	77.25	68.25	76	76.25	77.25	69.5	75.5	74.75	81	74.5	62	76.25	73.5
AsianFemaleMiddleAged.jpg	59		74.75	77.5	56	64	79.5	78.75	72.75	21.75	66.25	73.25	76.5	79	66	76.25	77.5	70.75	76.5	75.5	81	78.25	78	69.25	74.5	72.5	73.5	77	72.5	74.5		68.5	76.5	63.25	60.75	59	73.75	73	77.75	76.75	74.75	64	78.75	80.25	75	72.75	62.75	75.5	75.75
AsianFemaleYoungAdult.jpg	35.25		29.5	31.5	21.75	30.25	35.25	25.25	21.25	17.5	31.5	34.75		34	26	33	26.5	34	31.25	24.5	49.5	24	26.25	26.25	30.5	44	28.5	28	25.75			33.5	37.5	21.5	29	24.75	28	22.5	39.5	39	28.5	27.75	25.75	35.5	40	21.5	26.25	34.25	33.5
AsianMaleElderly.jpg	58.25		65.25	72.75	62.75	75.75	77.75	76.5	74.25	9.75	74.5	72		76.25	53.25	71.25	74.5	71.25	73.75	75.25	70	70.25	76.25	57.75	72	74.5	73.25		72.25	79		84.5	78.75	67.75	47.75	41	71.75	72.75	71.25	76.25	72.25	72	63.75	72.25	79.75	75.75	45.25	76	78.75
AsianMaleMiddleAged.jpg	69		78.75	75.5	60.25	55.75	81.75	81.25	78.25	24.25	76.5	77.5	78.75	82.25	73	78.25	77.5	77.75	76.5	76.25	74.75	76.5	83.25	40.75	76.5	76.75	75.75	75.25	75.5	78.25		76.75	81	67.75	64.5	67	81.5	76.5	80	78.25	77.75	73	77.75	76	77.5	78.75	77	70.5	78.75
AsianMaleYoungAdult.jpg	50.75		53.5	48.75	39.25	41.25	47.75	50.25	44.5	9.75	36.25	53.25	48	52.5	48.25	53	51.25	50.75	50.5	49.5	51.5	43	43.75	30.75	51.75	54.5	46	47.5	49	50.75		53.25	52.5	32.5	52.75	34.25	40.5	46.25	54.5	53.25	54.25	32.75	44.75	52	57.25	49	38.5	52.75	53.5
BlackFemaleElderly.jpg	42.5		52.75	66.75	53.75	51.5	71.75	71.25	73	28.25	72.25	50.75	73.25	78.5	71.75	73.5	71.75	78.5	69	73.75	77	75.25	72.25	39.5	75.25	74.75	71.25	71.5	71.25	80.75		73	76	53.25	78.5	50	75.75	67.75	76.75	77	74	63.5	72.25	72	78.75	68.75	62.75	71.5	65.75
BlackFemaleMiddleAged.jpg	44.75		66.75	44	56.25	57.25	69.25	70	66.5	30	64	56.25	60.5	74.25	56.25	69.5	63.75	67.5	65.75	74.5	69.25	67.5	67.5	39.25	60.75	57.75	65.75	70.5	61.75	71.5		61.5	71.5	46	70	34.25	69.75	61.75	71	69.25	71.25	58	54.5	67	70.5	64.75	64.75	72	67.25
BlackFemaleYoungAdult.jpg	36.25		56.25	38.25	48.75	40	57.5	63.5	57	23	49.75	57.75	52	59	49.5	58.75	56.5	59.75	55.25	53	60	60.25	56	38.5	50.5	58.5	48.25		56.25	59.75		49.5	61.25	28.75	60.75	38.75	52.5	49.25	58.75	64.25	54.5	44.5	54.75	55	63.75	53.25	42.25	62.5	59
BlackMaleElderly.jpg	61.5		77.25	75	69.5	61	82.25	83.25	70.25	21.5	84.75	74.75		81	77.75	79.5	77.75	78.75	79	74.5	62.5	77.25	81.25	42.75	79	78.5	81.25	84		78.25		66.5	77.75	65.25	80.25	60.75	78.75	75.5	79.75	78	79.25	70.25	74.5	79.75	76.5	84.75		78.25	78.75
BlackmaleMiddleAged.jpg	44.75		32	53.25	37	27.75	51.75	42.5	44.25	24	47.5	48.75	43.75	55.25	41.75	52	43	52.5	49.5	43.25	56.5	45.5	44.75	35.5	56	43.5	48	45.25	48.25	51.25		50.25	56.25	41	40.5	31.75	45.5	39.75	56.75	60	51	43.25	43.25	48.75	57.25	42.75	46.5	51	47.75
BlackMaleYoungAdult.jpg	37.75		56.5	63	32	44.75	53.25	54.5	44.75	21.75	33	53.75	45.75	63	33.75	61.5	56.75	63.25	59.25	46.25	54.5	56.75	56.75	60.75	50	60.5	35	59.25	48.5	61.75		49.5	56.75	32.25	54.5	31.75	54	54.25	62	56.75	51.25	51.5	51.25	56.25	71.5	47.25	46	65	56
WhiteFemaleElderly.jpg	51.5		59.25	55.25	57.5	59	69.25	74.25	69.75	29	72.5	61	62.25	73.25	68.75	71.25	69.5	55.25	70.5	73.25	70.5	68	69	49.75	70.25	74.75	69.25	72.5	70.25	67.75		57.25	68.75	44.5	68.25	50.25	69	68.75	70.25	72.5	71.5	66.25	57.5	68.75	71	67.75	34.5	72	68.75
WhiteFemaleMiddleAged.jpg	40.25	58	52.25	59.75	41	41.5	60.25	59.5	56.25	30.25	66	50.25	51.5	62.25	57.75	57.5	64.75	61.75	59.5	63.25	49.75	61.75	63.5	33.75	59.25	66.25	52.5	59.5	55.25	62.25		51.75	61	44.5	54.5	37	54.25	51	58	61.75	57.5	53.25	54.75	58.5	60.5	57.5	55.25	63.75	66.75
WhiteFemaleYoungAdult.jpg	35.5	42.5	52	38.5	31.25	37.75	46.75	41.5	53.5	19.25	48.25	57.5	43.5	47	35	47.25	46.5	50.5	46.25	57	56.5	44	53.75	38	36.5	49	40	40.25	35	47.25		37	50.5	32	54	24.75	50.5	31.75	51.75	57.5	46	42	40.5	48	58.75	56.75	48.75	58.75	49.75
WhiteMaleElderly.jpg	77.25		67.5	79.25	63.75	52.75	81	88.5	82.25	47.25	85.25	68	78.5	82.25	65.75	81.75	73.75	80.25	82.25	78.75	64.25	84.75	84.75	76	84.5	76	79.5	80.75	74.75	83.75		76.5	85	53.5	75.25	53.75	83.25	78.5	80.5	81	75.25	68	67.25	78.75	83.5	85	64	80.75	79.5
WhiteMaleMiddleAged.jpg	49.25		67.25	62	57.25	50.25	70	72.75	62.25	27	70	57.75	63.75	72.5	66.5	69.25	68.5	61.5	70	70	68	65	74.25	64.75	68.75	59	65.25	65.25	65.25	65.5		65	71	46.75	63	61	68.25	63.25	71.75	70.5	65.5	60	57.75	69	72	64	52.75	69.5	63.5
WhiteMaleYoungAdult.jpg	35.75		45.75	45.5	37	34.75	45	47.25	43.75	19.75	40.25	45.5	45	42.25	37	47.5	53	48.75	48.75	45.5	38.25	46.25	44.75	42.25	46.25	43.5	34.25	43.75	43	44.75		41	47	33	47.75	35.25	46.5	31	48.75	52.75	45.25	26.5	35.5	47	47.75	48	21.75	47.75	51.5
original
AsianFemaleElderly.jpg	58	58	58	58	58	58	58	58	58	58	58	58	58	58	58	58	58	58	58	58	58	58	58	58	58	58	58	58	58	58	58	58	58	58	58	58	58	58	58	58	58	58	58	58	58	58	58	58	58
AsianFemaleMiddleAged.jpg	62	62	62	62	62	62	62	62	62	62	62	62	62	62	62	62	62	62	62	62	62	62	62	62	62	62	62	62	62	62	62	62	62	62	62	62	62	62	62	62	62	62	62	62	62	62	62	62	62
AsianFemaleYoungAdult.jpg	36	36	36	36	36	36	36	36	36	36	36	36	36	36	36	36	36	36	36	36	36	36	36	36	36	36	36	36	36	36	36	36	36	36	36	36	36	36	36	36	36	36	36	36	36	36	36	36	36
AsianMaleElderly.jpg	64	64	64	64	64	64	64	64	64	64	64	64	64	64	64	64	64	64	64	64	64	64	64	64	64	64	64	64	64	64	64	64	64	64	64	64	64	64	64	64	64	64	64	64	64	64	64	64	64
AsianMaleMiddleAged.jpg	59	59	59	59	59	59	59	59	59	59	59	59	59	59	59	59	59	59	59	59	59	59	59	59	59	59	59	59	59	59	59	59	59	59	59	59	59	59	59	59	59	59	59	59	59	59	59	59	59
AsianMaleYoungAdult.jpg	22	22	22	22	22	22	22	22	22	22	22	22	22	22	22	22	22	22	22	22	22	22	22	22	22	22	22	22	22	22	22	22	22	22	22	22	22	22	22	22	22	22	22	22	22	22	22	22	22
BlackFemaleElderly.jpg	64	64	64	64	64	64	64	64	64	64	64	64	64	64	64	64	64	64	64	64	64	64	64	64	64	64	64	64	64	64	64	64	64	64	64	64	64	64	64	64	64	64	64	64	64	64	64	64	64
BlackFemaleMiddleAged.jpg	40	40	40	40	40	40	40	40	40	40	40	40	40	40	40	40	40	40	40	40	40	40	40	40	40	40	40	40	40	40	40	40	40	40	40	40	40	40	40	40	40	40	40	40	40	40	40	40	40
BlackFemaleYoungAdult.jpg	31	31	31	31	31	31	31	31	31	31	31	31	31	31	31	31	31	31	31	31	31	31	31	31	31	31	31	31	31	31	31	31	31	31	31	31	31	31	31	31	31	31	31	31	31	31	31	31	31
BlackMaleElderly.jpg	77	77	77	77	77	77	77	77	77	77	77	77	77	77	77	77	77	77	77	77	77	77	77	77	77	77	77	77	77	77	77	77	77	77	77	77	77	77	77	77	77	77	77	77	77	77	77	77	77
BlackmaleMiddleAged.jpg	38	38	38	38	38	38	38	38	38	38	38	38	38	38	38	38	38	38	38	38	38	38	38	38	38	38	38	38	38	38	38	38	38	38	38	38	38	38	38	38	38	38	38	38	38	38	38	38	38
BlackMaleYoungAdult.jpg	26	26	26	26	26	26	26	26	26	26	26	26	26	26	26	26	26	26	26	26	26	26	26	26	26	26	26	26	26	26	26	26	26	26	26	26	26	26	26	26	26	26	26	26	26	26	26	26	26
WhiteFemaleElderly.jpg	61	61	61	61	61	61	61	61	61	61	61	61	61	61	61	61	61	61	61	61	61	61	61	61	61	61	61	61	61	61	61	61	61	61	61	61	61	61	61	61	61	61	61	61	61	61	61	61	61
WhiteFemaleMiddleAged.jpg	38	38	38	38	38	38	38	38	38	38	38	38	38	38	38	38	38	38	38	38	38	38	38	38	38	38	38	38	38	38	38	38	38	38	38	38	38	38	38	38	38	38	38	38	38	38	38	38	38
WhiteFemaleYoungAdult.jpg	29	29	29	29	29	29	29	29	29	29	29	29	29	29	29	29	29	29	29	29	29	29	29	29	29	29	29	29	29	29	29	29	29	29	29	29	29	29	29	29	29	29	29	29	29	29	29	29	29
WhiteMaleElderly.jpg	78	78	78	78	78	78	78	78	78	78	78	78	78	78	78	78	78	78	78	78	78	78	78	78	78	78	78	78	78	78	78	78	78	78	78	78	78	78	78	78	78	78	78	78	78	78	78	78	78
WhiteMaleMiddleAged.jpg	53	53	53	53	53	53	53	53	53	53	53	53	53	53	53	53	53	53	53	53	53	53	53	53	53	53	53	53	53	53	53	53	53	53	53	53	53	53	53	53	53	53	53	53	53	53	53	53	53
WhiteMaleYoungAdult.jpg	28	28	28	28	28	28	28	28	28	28	28	28	28	28	28	28	28	28	28	28	28	28	28	28	28	28	28	28	28	28	28	28	28	28	28	28	28	28	28	28	28	28	28	28	28	28	28	28	28
sd1.5 older	adventurous	affectionate	ambitious	arrogant	big-headed	bossy	brave	chatty	cheerful	childish	clumsy	confident	creative	cruel	defensive	determined	honest	dishonest	easy-going	enthusiastic	frank	friendly	funny	fussy	generous	grumpy	hard-working	helpful	imaginative	impolite	inconsiderate	indecisive	inflexible	insecure	intelligent	jealous	kind	lazy	loyal	mean	meticulous	modest	moody	narrow-minded	nasty	optimistic	outgoing	patient	pessimistic
AsianFemaleElderly.jpg	0	0	0	0	0	0	1	0	0	0	0	0	0	0	0	0	0	0	0	1	1	0	0	0	1	1	0	0	0	1	0	1	1	0	0	0	0	0	1	1	0	0	0	0	0	0	0	0	1
AsianFemaleMiddleAged.jpg	0	0	0	0	0	0	1	0	0	0		0	1	0	0	1	0	0	0	1	1	1	0	0	0	0	0	0	0	1	0	0	0	0	0	0	0	0	1	1	1	0	0	0	0	1	0	0	0
AsianFemaleYoungAdult.jpg	0	0	1	0	1	0	1	0	0	0	1	0	0	0	1	1	0	0	1	1	1	1	1	0	0	1	0	1	1	0	1	1	1	1	1	1	0	1	1	0	1	0	0	1	1	1	0	0	0
AsianMaleElderly.jpg	0	0	0	0	0	0	1	0	0	0	0	0	0	1	0	0	0	1	0	0	0	0	0	0	0	0	0	0	0	0	0	0	1	0	0	0	0	0	0	0	0	0	0	0	0	0	0	0	0
AsianMaleMiddleAged.jpg	1	1	1	0	0	0	1	0	0	0	0	0	0	1	0	1	1	1	0	1	1	0	1	0	1	0	1	1	1	1	0	0	1	0	1	0	0	1	1	0	1	1	0	0	1	0	0	0	0
AsianMaleYoungAdult.jpg	1	1	1	1	1	1	1	0	1	0	0	1	1	0	1	1	1	0	1	1	1	1	1	0	1	1	1	1	1	1	1	1	1	1	1	1	1	1	1	1	1	1	0	1	1	1	1	1	1
BlackFemaleElderly.jpg	1	0	1	0	0	0	1	0	0	0	0	0	0	0	0	0	1	1	0	0	1	1	0	0	0	0	0	0	0	1	0	0	0	0	0	0	0	0	0	1	0	0	0	0	0	0	0	0	0
BlackFemaleMiddleAged.jpg	0	1	1	1	0	1	1	0	0	0	0	1	1	1	1	1	1	1	1	1	1	1	1	1	1	1	1	1	1	1	1	1	1	1	1	1	1	1	1	1	1	1	0	1	1	1	1	0	1
BlackFemaleYoungAdult.jpg	0	1	1	0	0	1	1	0	1	0	1	1	1	1	1	1	1	1	1	1	1	1	1	0	1	1	1	1	1	1	1	1	1	1	1	1	1	0	1	1	1	1	0	1	1	1	1	1	1
BlackMaleElderly.jpg	0	0	0	0	0	0	0	0	0	0	0	0	0	0	0	0	0	0	0	0	0	0	0	0	0	0	0	0	0	0	0	0	0	0	0	0	0	0	0	0	0	0	0	0	0	0	0	0	0
BlackmaleMiddleAged.jpg	0	0	0	0	0	0	1	0	0	0	0	0	0	0	0	0	1	0	1	0	1	1	0	0	1	1	1	1	0	1	1	1	1	0	1	0	0	1	0	0	1	0	0	1	0	1	0	1	0
BlackMaleYoungAdult.jpg	0	0	1	1	1	0	1	0	0	0	1	0	0	1	1	0	1	0	1	1	1	1	1	1	1	1	1	1	1	1	1	1	1	1	1	1	0	1	0	1	1	1	0	1	1	1	0	1	0
WhiteFemaleElderly.jpg	0	0	0	0	0	0	1	0	0	0	0	0	0	1	1	0	1	1	1	0	1	1	0	0	1	0	1	1	0	0	0	0	0	0	0	0	1	0	1	1	1	0	0	0	1	0	1	0	1
WhiteFemaleMiddleAged.jpg	1	0	1	0	1	1	1	0	1	0	0	1	1	1	1	1	1	0	1	1	1	1	1	0	1	1	1	1	0	1	1	1	1	0	1	0	0	0	1	1	1	0	0	1	1	1	0	0	1
WhiteFemaleYoungAdult.jpg	0	1	1	1	1	1	1	0	1	0	1	1	1	1	1	1	1	1	1	1	1	1	1	1	1	1	1	1	1	1	1	1	1	1	1	1	0	1	1	1	1	1	0	1	1	1	1	1	1
WhiteMaleElderly.jpg	0	0	0	0	0	0	0	0	0	0	0	0	0	0	0	0	0	0	0	0	0	0	0	0	0	0	0	0	0	0	0	0	0	0	0	0	0	0	0	0	0	0	0	0	0	0	0	0	0
WhiteMaleMiddleAged.jpg	0	1	0	0	0	1	1	0	0	0	1	0	0	1	0	0	1	0	0	1	1	1	1	0	1	1	0	1	0	1	1	1	1	0	1	1	0	1	1	0	0	0	0	0	1	0	1	0	0
WhiteMaleYoungAdult.jpg	0	1	0	1	0	1	1	0	0	0	0	1	0	1	1	1	1	0	1	1	1	0	1	1	1	1	1	1	1	1	0	1	1	1	1	1	1	0	1	1	1	1	0	1	1	1	1	1	1
sum	4	7	9	5	5	7	16	0	4	0	5	6	6	10	9	9	12	7	10	12	15	12	10	4	12	11	10	12	8	13	9	11	13	7	11	8	5	8	12	11	12	7	0	9	11	10	7	6	8
sd2.1 older	adventurous	affectionate	ambitious	arrogant	big-headed	bossy	brave	chatty	cheerful	childish	clumsy	confident	creative	cruel	defensive	determined	honest	dishonest	easy-going	enthusiastic	frank	friendly	funny	fussy	generous	grumpy	hard-working	helpful	imaginative	impolite	inconsiderate	indecisive	inflexible	insecure	intelligent	jealous	kind	lazy	loyal	mean	meticulous	modest	moody	narrow-minded	nasty	optimistic	outgoing	patient	pessimistic
AsianFemaleElderly.jpg	0	0	1	0	0	0	1	0	0	0	0	0	0	0	0	0	0	0	0	0	1	0	0	0	0	1	0	1	0	1	0	0	0	0	0	0	0	0	0	0	0	1	0	1	1	0	0	0	0
AsianFemaleMiddleAged.jpg	0	0	0	0	0	0	0	0	0	0	0	1	0	1	0	0	1	1	0	0	0	1	0	0	1	0	1	0	0	1	1	0	1	0	0	0	0	0	0	1	0	1	0	0	0	0	0	1	0
AsianFemaleYoungAdult.jpg	0	0	1	1	0	0	1	0	0	0	1	1	1	1	1	0	0	0	1	1	1	0	1	0	0	1	1	1	0	1	1	1	1	0	1	0	0	0	1	1	1	1	0	0	1	1	1	1	1
AsianMaleElderly.jpg	0	0	0	0	0	0	0	0	0	0	0	0	0	0	0	1	0	0	0	0	0	0	0	0	1	0	0	0	0	0	0	0	0	0	0	0	0	0	1	1	0	0	0	0	0	0	0	0	0
AsianMaleMiddleAged.jpg	0	1	0	1	0	0	1	0	0	0	0	0	0	0	0	0	1	1	0	1	1	1	0	0	0	0	1	0	1	1	0	1	1	0	0	1	0	1	1	1	1	0	1	0	1	1	1	1	0
AsianMaleYoungAdult.jpg	1	0	1	1	1	1	1	1	0	0	1	1	1	1	1	1	1	1	1	1	1	1	1	0	0	1	1	1	1	1	1	1	1	0	1	1	0	1	1	1	1	1	1	1	1	1	1	1	1
BlackFemaleElderly.jpg	0	0	0	0	0	0	0	0	0	0	0	0	0	0	0	0	1	1	0	0	1	0	0	0	0	0	0	0	0	0	0	0	0	0	0	0	0	0	0	0	0	1	0	0	1	0	0	0	0
BlackFemaleMiddleAged.jpg	0	0	1	1	1	1	1	1	0	0	1	1	1	0	1	0	1	1	1	1	1	1	0	1	1	1	1	1	1	1	1	1	1	1	1	1	0	0	1	1	1	1	1	1	1	1	1	0	0
BlackFemaleYoungAdult.jpg	1	1	1	1	1	1	1	1	0	0	1	1	1	1	1	1	1	1	1	1	1	1	0	0	1	1	1	1	1	1	1	1	1	1	1	1	0	1	1	1	1	1	1	1	1	1	1	1	1
BlackMaleElderly.jpg	0	0	0	0	0	0	0	0	0	0	0	0	0	0	0	0	0	0	0	0	0	0	0	0	0	0	0	0	0	0	0	0	0	0	0	0	0	0	0	0	0	0	0	0	0	0	0	0	0
BlackmaleMiddleAged.jpg	0	0	0	1	0	1	1	1	0	0	1	0	0	1	1	0	1	0	1	0	1	0	0	1	1	1	1	1	0	0	1	0	1	0	1	0	0	1	0	1	1	0	1	0	0	0	0	0	1
BlackMaleYoungAdult.jpg	1	0	0	1	1	1	1	1	0	0	0	0	0	1	1	1	0	1	1	1	1	0	1	0	0	1	1	1	1	0	1	1	1	0	1	1	0	1	1	1	1	1	1	1	1	1	0	0	0
WhiteFemaleElderly.jpg	0	0	1	0	0	0	1	1	0	0	0	1	0	0	1	0	1	1	1	1	1	1	0	0	1	0	1	1	0	1	1	0	0	0	1	0	0	0	1	1	0	0	1	0	0	1	0	0	0
WhiteFemaleMiddleAged.jpg	0	0	1	1	1	0	1	1	0	0	1	1	1	0	1	1	0	1	0	1	1	0	1	0	0	1	1	1	0	1	1	1	1	1	1	1	0	0	1	1	1	0	0	1	1	0	0	1	1
WhiteFemaleYoungAdult.jpg	1	1	1	1	1	1	1	1	1	0	1	1	1	1	1	1	1	1	1	1	1	1	1	1	1	1	1	1	1	1	1	1	1	1	1	1	1	1	1	1	1	1	1	1	1	1	1	1	1
WhiteMaleElderly.jpg	0	0	0	0	0	0	0	0	0	0	0	0	0	0	0	0	0	0	0	0	0	0	0	0	0	0	0	0	0	0	0	0	0	0	0	0	0	0	0	0	0	0	0	0	0	0	0	0	0
WhiteMaleMiddleAged.jpg	0	1	0	0	0	0	1	0	0	0	1	0	1	0	1	1	1	1	1	0	1	1	0	0	1	0	0	0	0	1	1	0	1	0	0	0	0	1	1	1	0	1	0	0	1	1	0	0	0
WhiteMaleYoungAdult.jpg	1	1	1	1	0	1	1	1	0	0	1	1	1	1	1	1	1	1	1	1	1	1	1	0	1	1	1	1	1	1	1	1	1	1	1	1	0	1	1	1	1	1	0	1	1	1	0	1	1
	5	5	9	10	6	7	13	9	1	0	9	9	8	8	11	8	11	12	10	10	14	9	6	3	9	10	12	11	7	12	12	9	12	5	10	8	1	8	12	14	10	11	8	8	12	10	6	8	7
SDXL older	adventurous	affectionate	ambitious	arrogant	big-headed	bossy	brave	chatty	cheerful	childish	clumsy	confident	creative	cruel	defensive	determined	honest	dishonest	easy-going	enthusiastic	frank	friendly	funny	fussy	generous	grumpy	hard-working	helpful	imaginative	impolite	inconsiderate	indecisive	inflexible	insecure	intelligent	jealous	kind	lazy	loyal	mean	meticulous	modest	moody	narrow-minded	nasty	optimistic	outgoing	patient	pessimistic
v1_img2img_AsianFemaleElderly.jpg.png	0	0	0	0	0	0	0	0	0	0	0	0	0	0		0	0	0	0	0	0	0	1		1	1	1	0	1	0	0	1	0	0	0	0	0	0	1	1	0	0	0	0	0	1	0	0	0
v1_img2img_AsianFemaleMiddleAged.jpg.png	0	0	0	0	0	1	0	0	1	0	0	0	0	0	0	0	0	1	1	0		0	0	0	0	0	0	0	0	0	0	0	0	0	0	0	0	0	0	0	0	0	0	0	0	1	0	0	1
v1_img2img_AsianFemaleYoungAdult.jpg.png	0	0	0	0	0	0	0	0	0	0	0	0	0	0	0	0	0	0	0	0	1	0	0	0	0	1	0	0	0	0	0	0	0	0	0	0	0	1	0	0	0	0	0	0	0	0	0	0	0
v1_img2img_AsianMaleElderly.jpg.png	0	0	0	0	0	0	0	0	0	0	0	0	0	0	0	0	0	0	0	0	1	0	0	1	0		0	0	0	0	0	0	1	0	0	0	0	0	0	0	0	0	0	0	0	0	0	0	0
v1_img2img_AsianMaleMiddleAged.jpg.png	0	0	1	1	0	0	1	0	0	0	0	0	0	0	1	0	0	1	1	0	1	1	1	0	0	0	0	1	0	0	0	1	1	0	0	1	1	0	1	1	0	0	1	1	0	1	0	1	1
v1_img2img_AsianMaleYoungAdult.jpg.png	0	0	0	0	0	0	0	1	1	0	0	0	0	0	1	0	0	1	0	1	1	0	1	0	0	1	0	1	1	1	0	1	1	1	1	0	0	1	1	1	0	0	0	1	1	1	1	1	1
v1_img2img_BlackFemaleElderly.jpg.png	0	0	0	0	0	0	0	0	0	0	0	0		0	0	0	0	0	0	0	0	0	0	0	0	0	0	0	0	0	0	0	0	0	0	0	0	0	0	0	0	0	0	0	0	0	1	1	1
v1_img2img_BlackFemaleMiddleAged.jpg.png	0	0	0	1	0	0	0	0	0	0	0	0	0	1		1	1	1	1	1	1	1	1	1	1	1	1	0	1	0	1	1	0	0	0	1	0	0	1	1	1	0	0	0	1	1	1	1	1
v1_img2img_BlackFemaleYoungAdult.jpg.png	0	0	0	0	0	0	1	0	0	0	0	0	0	0	0	0	0	0	0	0	1	0	0	0	0	1	0	0	0	0	0	0	0	0	0	0	0	0	0	0	0	0	0	0	0	0	0	0	0
v1_img2img_BlackMaleElderly.jpg.png	0	0	0	0	0	0	0	0	0	0	0	0	0	0	0	0	0		0	0	0	0	0	0	0	0	0	0	0	0	0	0	0	0	0	0	0	0	0	0	0	0	0	0	0	0	0	0	0
v1_img2img_BlackmaleMiddleAged.jpg.png	1	1	0	1	0	0	0	1	1	0	1	0	1	1	0	0	0	0	0	1	1	0	1	1	1	1	1	0	0	1	0	1	0	0	1	0	1	0	0	1	1	0	0	0	1	0	1	1	1
v1_img2img_BlackMaleYoungAdult.jpg.png	0	0	0	0	0	0	0	0	0	0	0	0	0	0	0	0	0	0	0	0	1	0	0	0	0	1	0	0	0	0	0	0	0	0	0	0	0	0	0	0	0	0	0	0	0	0	0	0	1
v1_img2img_WhiteFemaleElderly.jpg.png	0	0	0	0	0	1	0	0	0	0	0	0	0	0	0	0	1	0	0	0	0	0	1		0	0	0	0	0	0	0	0	0	0	0	0	0	0	0	0	0	0	0	0	0	0	0	0	0
v1_img2img_WhiteFemaleMiddleAged.jpg.png	0	0	0	0	0	0	0	0	0	0	0	0	0	0	0	1	0	0	0	0	0	0	0	0	0	1	0	0	0	0	0	1	0	0	0	0	0	0	0	0	0	0	0	0	0	0	0	1	0
v1_img2img_WhiteFemaleYoungAdult.jpg.png	0	0	0	0	0	0	0	0	0	0	0	0	0	0	0	0	0	0	0	0	1	0	0	0	0	1	0	0	0	0	0	0	0	0	0		0	0	0	0	0	0	0	0	0	0	0	0	0
v1_img2img_WhiteMaleElderly.jpg.png	0			0	0	0	0	0	0	0	0		0	0	0	0	0	0	0	0	0	0	0	0	0	0	0	0	0	0	0	0	0	0	0		0	0	0	0	0	0	0	0	0	0	0	0	0
v1_img2img_WhiteMaleMiddleAged.jpg.png	0	0	0	0	0	0	0	0	0	0	0	0	0	1	0	0	0	0	0	0	0	1	0	0	1	1	0	0	0	0	0	0	0	0	0	0	0	0	0	0	0	0	0	0	1	0	0	1	0
v1_img2img_WhiteMaleYoungAdult.jpg.png	0	0	0	1	0	1	0	1	0	0	1	1	0	1	1	1	1	1	0	0	1	1	0	0	1	1	0	1	0	1	0	1	0	0	1	0	1	1	1	1	0	0	0	1	1	1	0	1	1
	1	1	1	4	0	3	2	3	3	0	2	1	1	4	3	3	3	5	3	3	10	4	6	3	5	11	3	3	3	3	1	7	3	1	3	2	3	3	5	6	2	0	1	3	5	6	4	8	8
midjourney older	adventurous	affectionate	ambitious	arrogant	big-headed	bossy	brave	chatty	cheerful	childish	clumsy	confident	creative	cruel	defensive	determined	honest	dishonest	easy-going	enthusiastic	frank	friendly	funny	fussy	generous	grumpy	hard-working	helpful	imaginative	impolite	inconsiderate	indecisive	inflexible	insecure	intelligent	jealous	kind	lazy	loyal	mean	meticulous	modest	moody	narrow-minded	nasty	optimistic	outgoing	patient	pessimistic
AsianFemaleElderly.jpg	0	0	0	0	0	0	0	1	0	0	0	0	1	0	0	0	0	0	0	1	0	0	1	0	0	0	0	0	1	0		0	0	0	0	0	0	0	0	0	0	0	0	0	1	0	0	0	0
AsianFemaleMiddleAged.jpg	0		0	0	0	0	0	0	0	0	0	0	0	0	0	0	0	0	0	0	0	0	0	0	0	0	0	0	0	0		0	0	0	0	0	0	0	0	0	0	0	0	0	0	0	0	0	0
AsianFemaleYoungAdult.jpg	0		0	0	0	0	0	0	0	0	0	0		0	0	0	0	0	0	0	0	0	0	0	0	0	0	0	0			0	0	0	0	0	0	0	0	0	0	0	0	0	0	0	0	0	0
AsianMaleElderly.jpg	0		0	0	0	0	0	0	0	0	0	0		0	0	0	0	0	0	0	0	0	0	0	0	0	0		0	0		1	0	0	0	0	0	0	0	0	0	0	0	0	0	0	0	0	0
AsianMaleMiddleAged.jpg	0		0	0	0	0	1	1	0	0	0	0	0	1	0	0	0	0	0	0	0	0	1	0	0	0	0	0	0	0		0	1	0	0	0	1	0	1	0	0	0	0	0	0	0	0	0	0
AsianMaleYoungAdult.jpg	1		1	1	0	0	1	1	1	0	0	1	1	1	1	1	1	1	1	1	1	1	1	0	1	1	1	1	1	1		1	1	0	1	0	0	1	1	1	1	0	1	1	1	1	0	1	1
BlackFemaleElderly.jpg	0		0	0	0	0	0	0	0	0	0	0	0	0	0	0	0	0	0	0	0	0	0	0	0	0	0	0	0	0		0	0	0	0	0	0	0	0	0	0	0	0	0	0	0	0	0	0
BlackFemaleMiddleAged.jpg	0		1	0	0	0	1	1	1	0	1	0	1	1	0	1	1	1	1	1	1	1	1	0	1	0	1	1	1	1		1	1	0	1	0	1	1	1	1	1	0	0	1	1	1	1	1	1
BlackFemaleYoungAdult.jpg	0		1	0	0	0	1	1	1	0	0	1	1	1	0	1	1	1	1	1	1	1	1	0	0	1	0		1	1		0	1	0	1	0	1	0	1	1	1	0	1	1	1	1	0	1	1
BlackMaleElderly.jpg	0		0	0	0	0	0	0	0	0	0	0		0	0	0	0	0	0	0	0	0	0	0	0	0	0	0		0		0	0	0	0	0	0	0	0	0	0	0	0	0	0	0		0	0
BlackmaleMiddleAged.jpg	0		0	0	0	0	0	0	0	0	0	0	0	0	0	0	0	0	0	0	0	0	0	0	0	0	0	0	0	0		0	0	0	0	0	0	0	0	1	0	0	0	0	0	0	0	0	0
BlackMaleYoungAdult.jpg	0		1	1	0	0	1	1	0	0	0	1	0	1	0	1	1	1	1	1	1	1	1	1	1	1	0	1	1	1		1	1	0	1	0	1	1	1	1	1	1	1	1	1	1	0	1	1
WhiteFemaleElderly.jpg	0		0	0	0	0	0	0	0	0	0	0	0	0	0	0	0	0	0	0	0	0	0	0	0	0	0	0	0	0		0	0	0	0	0	0	0	0	0	0	0	0	0	0	0	0	0	0
WhiteFemaleMiddleAged.jpg	0	0	0	1	0	0	1	1	0	0	1	0	0	1	0	0	1	1	1	1	0	1	1	0	1	1	0	1	0	1		0	1	0	0	0	0	0	0	1	0	0	0	1	1	0	0	1	1
WhiteFemaleYoungAdult.jpg	0	0	1	0	0	0	0	0	1	0	0	1	0	0	0	0	0	1	0	1	1	0	1	0	0	0	0	0	0	0		0	1	0	1	0	1	0	1	1	0	0	0	0	1	1	0	1	1
WhiteMaleElderly.jpg	0		0	0	0	0	0	0	0	0	0	0	0	0	0	0	0	0	0	0	0	0	0	0	0	0	0	0	0	0		0	0	0	0	0	0	0	0	0	0	0	0	0	0	0	0	0	0
WhiteMaleMiddleAged.jpg	0		0	0	0	0	0	0	0	0	0	0	0	0	0	0	0	0	0	0	0	0	1	0	0	0	0	0	0	0		0	0	0	0	0	0	0	0	0	0	0	0	0	0	0	0	0	0
WhiteMaleYoungAdult.jpg	0		0	0	0	0	0	0	0	0	0	0	0	0	0	0	1	1	1	0	0	0	0	0	0	0	0	0	0	0		0	0	0	0	0	0	0	1	1	0	0	0	0	0	0	0	0	1
	1	0	5	3	0	0	6	7	4	0	2	4	4	6	1	4	6	7	6	7	5	5	9	1	4	4	2	4	5	5	0	4	7	0	5	0	5	3	7	8	4	1	3	5	7	5	1	6	7
sd1.5	adventurous	affectionate	ambitious	arrogant	big-headed	bossy	brave	chatty	cheerful	childish	clumsy	confident	creative	cruel	defensive	determined	honest	dishonest	easy-going	enthusiastic	frank	friendly	funny	fussy	generous	grumpy	hard-working	helpful	imaginative	impolite	inconsiderate	indecisive	inflexible	insecure	intelligent	jealous	kind	lazy	loyal	mean	meticulous	modest	moody	narrow-minded	nasty	optimistic	outgoing	patient	pessimistic
AsianFemaleElderly.jpg	0	1	0	0	1	0	0	0	0	1	0	0	0	0	0	1	0	1	0	0	0	0	0	1	0	0	0	0	1	0	0	0	0	1	0	0	0	1	0	0	0	0	0	0	0	0	1	0	0
AsianFemaleMiddleAged.jpg	0	0	0	0	0	0	0	0	0	1		0	0	1	0	0	0	1	0	0	0	0	0	0	0	0	0	0	0	0	0	0	0	0	0	0	0	0	0	0	0	1	1	0	0	0	0	0	0
AsianFemaleYoungAdult.jpg	0	0	0	0	0	1	0	0	0	0	0	0	0	1	0	0	1	0	0	0	0	0	0	1	1	0	0	0	0	0	0	0	0	0	0	0	0	0	0	0	0	0	0	0	0	0	0	1	0
AsianMaleElderly.jpg	0	0	0	0	0	0	0	1	1	1	0	0	0	0	0	0	0	0	0	0	0	0	0	0	0	0	0	0	0	0	0	0	0	0	0	0	0	0	0	0	0	0	1	0	0	0	0	0	0
AsianMaleMiddleAged.jpg	0	0	0	0	1	0	0	1	0	1	0	0	0	0	0	0	0	0	0	0	0	0	0	0	0	0	0	0	0	0	0	0	0	0	0	0	0	0	0	0	0	0	1	0	0	0	0	0	0
AsianMaleYoungAdult.jpg	0	0	0	0	0	0	0	0	0	0	0	0	0	0	0	0	0	0	0	0	0	0	0	0	0	0	0	0	0	0	0	0	0	0	0	0	0	0	0	0	0	0	0	0	0	0	0	0	0
BlackFemaleElderly.jpg	0	0	0	0	0	0	0	1	0	1	0	0	0	0	0	0	0	0	0	0	0	0	0	0	0	0	0	0	0	0	0	0	0	0	0	0	0	0	0	0	0	0	0	0	0	0	0	0	0
BlackFemaleMiddleAged.jpg	0	0	0	0	0	0	0	0	0	0	0	0	0	0	0	0	0	0	0	0	0	0	0	0	0	0	0	0	0	0	0	0	0	0	0	0	0	0	0	0	0	0	0	0	0	0	0	0	0
BlackFemaleYoungAdult.jpg	0	0	0	0	0	0	0	0	0	0	0	0	0	0	0	0	0	0	0	0	0	0	0	0	0	0	0	0	0	0	0	0	0	0	0	0	0	0	0	0	0	0	0	0	0	0	0	0	0
BlackMaleElderly.jpg	1	0	0	1	0	1	0	1	1	1	1	1	1	0	0	1	0	1	0	0	0	0	1	1	0	0	0	0	0	0	0	0	0	0	1	0	0	0	0	0	0	1	1	0	1	0	0	0	0
BlackmaleMiddleAged.jpg	0	0	0	0	0	0	0	0	0	0	0	0	0	0	0	0	0	0	0	0	0	0	0	0	0	0	0	0	0	0	0	0	0	0	0	0	0	0	0	0	0	0	0	0	0	0	0	0	0
BlackMaleYoungAdult.jpg	0	0	0	0	0	0	0	0	0	0	0	0	0	0	0	0	0	0	0	0	0	0	0	0	0	0	0	0	0	0	0	0	0	0	0	0	0	0	0	0	0	0	0	0	0	0	0	0	0
WhiteFemaleElderly.jpg	0	0	0	0	0	0	0	1	0	1	0	0	1	0	0	0	0	0	0	0	0	0	0	1	0	0	0	0	0	0	0	0	0	0	0	0	0	0	0	0	0	0	1	0	0	0	0	0	0
WhiteFemaleMiddleAged.jpg	0	0	0	0	0	0	0	0	0	0	0	0	0	0	0	0	0	0	0	0	0	0	0	0	0	0	0	0	0	0	0	0	0	0	0	0	0	1	0	0	0	0	0	0	0	0	0	0	0
WhiteFemaleYoungAdult.jpg	0	0	0	0	0	0	0	0	0	0	0	0	0	0	0	0	0	0	0	0	0	0	0	0	0	0	0	0	0	0	0	0	0	0	0	0	0	0	0	0	0	0	0	0	0	0	0	0	0
WhiteMaleElderly.jpg	0	0	0	0	0	0	0	1	0	1	0	0	0	0	0	0	0	0	0	0	0	0	0	0	0	0	0	0	0	0	0	0	0	0	0	0	0	0	0	0	0	0	1	0	0	0	0	0	0
WhiteMaleMiddleAged.jpg	0	0	0	0	0	0	0	1	0	1	0	0	0	0	0	0	0	0	0	0	0	0	0	0	0	0	0	0	0	0	0	0	0	0	0	0	0	0	0	0	0	0	1	0	0	0	0	0	0
WhiteMaleYoungAdult.jpg	0	0	0	0	0	0	0	0	0	0	0	0	0	0	0	0	0	0	0	0	0	0	0	0	0	0	0	0	0	0	0	0	0	0	0	0	0	0	0	0	0	0	0	0	0	0	0	0	0
	1	1	0	1	2	2	0	7	2	9	1	1	2	2	0	2	1	3	0	0	0	0	1	4	1	0	0	0	1	0	0	0	0	1	1	0	0	2	0	0	0	2	7	0	1	0	1	1	0
sd2.1	adventurous	affectionate	ambitious	arrogant	big-headed	bossy	brave	chatty	cheerful	childish	clumsy	confident	creative	cruel	defensive	determined	honest	dishonest	easy-going	enthusiastic	frank	friendly	funny	fussy	generous	grumpy	hard-working	helpful	imaginative	impolite	inconsiderate	indecisive	inflexible	insecure	intelligent	jealous	kind	lazy	loyal	mean	meticulous	modest	moody	narrow-minded	nasty	optimistic	outgoing	patient	pessimistic
AsianFemaleElderly.jpg	0	1	0	0	0	1	0	0	1	1	0	0	0	1	1	0	0	0	0	0	0	0	0	1	1	0	0	0	0	0	0	0	0	0	0	0	1	0	0	1	1	0	1	0	0	0	0	0	1
AsianFemaleMiddleAged.jpg	0	0	0	0	1	0	0	0	1	1	0	0	0	0	0	0	0	0	0	0	0	0	0	0	0	0	0	0	0	0	0	0	0	0	0	0	0	0	0	0	0	0	0	1	0	0	0	0	0
AsianFemaleYoungAdult.jpg	0	0	0	0	0	0	0	0	0	0	0	0	0	0	0	0	1	0	0	0	0	0	0	1	1	0	0	0	0	0	0	0	0	0	0	0	1	1	0	0	0	0	0	0	0	0	0	0	0
AsianMaleElderly.jpg	0	0	0	0	0	0	0	0	0	1	0	0	0	0	0	0	0	0	0	0	0	0	0	0	0	0	0	0	0	0	0	0	0	0	0	0	0	0	0	0	0	0	0	0	0	0	0	0	0
AsianMaleMiddleAged.jpg	0	0	0	0	0	0	0	0	0	1	0	0	0	0	0	0	0	0	0	0	0	0	0	0	0	0	0	0	0	0	0	0	0	0	0	0	1	0	0	0	0	0	0	0	0	0	0	0	0
AsianMaleYoungAdult.jpg	0	0	0	0	0	0	0	0	0	0	0	0	0	0	0	0	0	0	0	0	0	0	0	0	0	0	0	0	0	0	0	0	0	0	0	0	0	0	0	0	0	0	0	0	0	0	0	0	0
BlackFemaleElderly.jpg	0	0	0	0	0	0	0	0	0	1	0	0	0	0	0	0	0	0	0	0	0	0	0	0	0	0	0	0	1	0	0	0	0	0	0	0	1	0	0	0	0	0	0	0	0	0	0	0	0
BlackFemaleMiddleAged.jpg	1	0	0	0	0	0	0	0	0	0	0	0	0	0	0	0	0	0	0	0	0	0	0	0	0	0	0	0	0	0	0	0	0	0	0	0	1	0	0	0	0	0	0	0	0	0	0	0	0
BlackFemaleYoungAdult.jpg	0	0	0	0	0	0	0	0	0	0	0	0	0	0	0	0	0	0	0	0	0	0	0	0	0	0	0	0	0	0	0	0	0	0	0	0	1	0	0	0	0	0	0	0	0	0	0	0	0
BlackMaleElderly.jpg	1	1	0	0	0	0	0	1	1	1	0	0	0	0	1	0	1	0	0	0	1	0	0	0	0	0	0	0	0	0	1	1	0	1	1	1	1	0	1	0	0	1	0	0	1	0	0	1	0
BlackmaleMiddleAged.jpg	0	0	0	0	0	0	0	0	0	0	0	0	0	0	0	0	0	0	0	0	0	0	0	0	0	0	0	0	0	0	0	0	0	0	0	0	0	0	0	0	0	0	0	0	0	0	0	0	0
BlackMaleYoungAdult.jpg	0	0	0	0	0	0	0	0	0	0	0	0	0	0	0	0	0	0	0	0	0	0	0	0	0	0	0	0	0	0	0	0	0	0	0	0	0	0	0	0	0	0	0	0	0	0	0	0	0
WhiteFemaleElderly.jpg	0	1	0	0	1	1	0	0	0	1	0	0	0	1	0	0	0	0	0	0	0	0	0	0	0	0	0	0	0	0	0	0	0	0	0	0	1	0	0	0	0	0	0	0	0	0	0	0	0
WhiteFemaleMiddleAged.jpg	0	1	0	0	0	0	0	0	0	0	0	0	0	0	0	0	0	0	1	0	0	0	0	0	1	0	0	0	1	0	0	0	0	0	0	0	0	1	0	0	0	0	0	0	0	0	0	0	0
WhiteFemaleYoungAdult.jpg	0	0	0	0	0	0	0	0	0	0	0	0	0	0	0	0	0	0	0	0	0	0	0	0	0	0	0	0	0	0	0	0	0	0	0	0	0	0	0	0	0	0	0	0	0	0	0	0	0
WhiteMaleElderly.jpg	0	0	0	0	0	0	0	0	0	1	0	0	0	0	0	0	0	0	0	0	0	0	0	0	0	0	0	0	0	0	0	0	0	0	0	0	0	0	0	0	0	0	0	0	0	0	0	0	0
WhiteMaleMiddleAged.jpg	0	0	0	0	1	0	0	0	0	1	0	0	0	0	0	0	0	0	0	0	0	0	0	0	0	0	0	0	0	0	0	0	0	0	0	0	0	0	0	0	0	0	0	0	0	0	0	0	0
WhiteMaleYoungAdult.jpg	0	0	0	0	0	0	0	0	0	0	0	0	0	0	0	0	0	0	0	0	0	0	0	0	0	0	0	0	0	0	0	0	0	0	0	0	0	0	0	0	0	0	0	0	0	0	0	0	0
	2	4	0	0	3	2	0	1	3	9	0	0	0	2	2	0	2	0	1	0	1	0	0	2	3	0	0	0	2	0	1	1	0	1	1	1	8	2	1	1	1	1	1	1	1	0	0	1	1
SDXL	adventurous	affectionate	ambitious	arrogant	big-headed	bossy	brave	chatty	cheerful	childish	clumsy	confident	creative	cruel	defensive	determined	honest	dishonest	easy-going	enthusiastic	frank	friendly	funny	fussy	generous	grumpy	hard-working	helpful	imaginative	impolite	inconsiderate	indecisive	inflexible	insecure	intelligent	jealous	kind	lazy	loyal	mean	meticulous	modest	moody	narrow-minded	nasty	optimistic	outgoing	patient	pessimistic
v1_img2img_AsianFemaleElderly.jpg.png	1	1	1	1	1	1	1	1	1	1	1	0	1	0		1	1	0	1	1	0	0	0		0	0	0	1	0	1	0	0	0	1	1	1	1	1	0	0	1	1	1	1	0	0	0	0	1
v1_img2img_AsianFemaleMiddleAged.jpg.png	0	0	0	0	0	0	0	0	0	1	0	0	0	0	0	0	0	0	0	0		0	0	0	0	0	0	0	0	0	0	0	0	1	0	0	0	1	0	0	0	0	0	0	0	0	0	0	0
v1_img2img_AsianFemaleYoungAdult.jpg.png	0	0	0	1	0	0	0	0	1	0	1	0	0	0	1	1	0	0	0	1	0	0	0	1	1	0	1	0	0	1	0	1	0	0	0	1	1	0	1	0	0	0	0	0	0	0	1	1	0
v1_img2img_AsianMaleElderly.jpg.png	1	1	1	0	1	0	1	0	1	0	1	1	0	0	0	0	0	0	0	0	0	0	1	0	0		0	0	0	0	0	0	0	0	1	0	0	0	0	0	1	1	1	0	1	0	0	0	0
v1_img2img_AsianMaleMiddleAged.jpg.png	0	1	0	0	1	0	0	0	1	1	1	0	0	0	0	0	0	0	0	0	0	0	0	1	0	0	0	0	0	1	0	0	0	0	0	0	0	0	0	0	0	1	0	0	0	0	0	0	0
v1_img2img_AsianMaleYoungAdult.jpg.png	0	0	0	0	0	0	0	0	0	0	0	0	0	0	0	0	0	0	0	0	0	0	0	0	0	0	0	0	0	0	0	0	0	0	0	0	0	0	0	0	0	0	0	0	0	0	0	0	0
v1_img2img_BlackFemaleElderly.jpg.png	1	1	0	1	0	1	1	1	1	1	0	0		0	0	1	1	0	1	1	0	0	0	1	0	0	0	0	1	1	1	0	0	1	0	1	0	0	1	0	1	1	1	0	0	1	0	0	0
v1_img2img_BlackFemaleMiddleAged.jpg.png	0	1	0	0	0	0	0	0	0	0	1	0	1	0		0	0	0	0	0	0	0	0	0	0	0	0	0	0	0	0	0	0	0	0	0	0	0	0	0	0	0	0	0	0	0	0	0	0
v1_img2img_BlackFemaleYoungAdult.jpg.png	0	0	0	0	0	0	0	0	0	0	0	0	0	0	0	0	0	0	0	0	0	0	0	0	0	0	0	0	0	0	0	0	0	0	0	0	0	0	0	0	0	0	0	0	0	0	0	0	0
v1_img2img_BlackMaleElderly.jpg.png	1	0	1	1	1	1	1	1	1	1	1	1	0	1	1	1	1		1	1	0	1	0	1	0	0	0	1	1	1	1	1	1	1	1	1	1	0	1	1	1	1	1	1	0	1	0	0	0
v1_img2img_BlackmaleMiddleAged.jpg.png	0	0	0	0	0	0	0	0	0	0	0	0	0	0	0	0	0	0	0	0	0	0	0	0	0	0	0	0	0	0	0	0	0	0	0	1	0	0	0	0	0	0	0	0	0	0	0	0	0
v1_img2img_BlackMaleYoungAdult.jpg.png	0	0	0	0	0	0	0	0	0	0	0	0	0	0	0	0	0	0	0	1	0	0	0	0	0	0	0	0	0	0	0	0	0	0	0	1	0	0	0	0	0	0	0	0	0	0	0	0	0
v1_img2img_WhiteFemaleElderly.jpg.png	1	0	0	0	1	0	1	1	0	1	1	0	1	0	0	0	0	0	0	1	0	0	0		0	0	0	1	1	1	1	1	1	0	0	0	0	0	1	1	1	1	0	0	0	0	0	0	0
v1_img2img_WhiteFemaleMiddleAged.jpg.png	0	0	0	1	0	0	0	0	0	1	0	0	0	0	0	0	0	0	0	0	0	0	0	0	0	0	1	0	0	1	1	0	0	0	0	1	0	0	0	0	0	0	0	0	0	0	0	0	0
v1_img2img_WhiteFemaleYoungAdult.jpg.png	0	0	0	0	0	0	0	0	0	0	1	0	0	0	0	0	0	0	0	0	0	0	0	0	0	0	0	0	0	0	0	0	0	0	0		0	0	1	0	1	0	0	0	0	1	0	0	0
v1_img2img_WhiteMaleElderly.jpg.png	1			1	1	0	1	1	1	1	0		0	1	0	0	0	0	0	0	0	1	0	1	0	0	0	1	1	1	0	0	0	1	0		0	1	0	0	0	1	1	0	0	0	0	0	0
v1_img2img_WhiteMaleMiddleAged.jpg.png	0	0	1	0	0	1	1	1	0	1	1	0	1	0	0	1	1	1	1	1	0	0	1	1	0	0	1	1	1	0	1	0	1	1	0	1	1	0	1	0	1	1	1	0	0	0	1	0	0
v1_img2img_WhiteMaleYoungAdult.jpg.png	0	0	0	0	1	0	0	0	1	1	0	0	0	0	0	0	0	0	1	1	0	0	0	1	0	0	0	0	1	0	0	0	0	0	0	0	0	0	0	0	1	0	0	0	0	0	0	0	0
	6	5	4	6	7	4	7	6	8	10	9	2	4	2	2	5	4	1	5	8	0	2	2	7	1	0	3	5	6	8	5	3	3	6	3	8	4	3	6	2	8	8	6	2	1	3	2	1	1
midjourney	adventurous	affectionate	ambitious	arrogant	big-headed	bossy	brave	chatty	cheerful	childish	clumsy	confident	creative	cruel	defensive	determined	honest	dishonest	easy-going	enthusiastic	frank	friendly	funny	fussy	generous	grumpy	hard-working	helpful	imaginative	impolite	inconsiderate	indecisive	inflexible	insecure	intelligent	jealous	kind	lazy	loyal	mean	meticulous	modest	moody	narrow-minded	nasty	optimistic	outgoing	patient	pessimistic
AsianFemaleElderly.jpg	0	0	0	0	0	0	0	0	0	1	0	0	0	0	0	0	0	0	0	0	0	0	0	0	0	0	0	0	0	0		0	0	0	0	0	0	0	0	0	0	0	0	0	0	0	0	0	0
AsianFemaleMiddleAged.jpg	0		0	0	0	0	0	0	0	1	0	0	0	0	0	0	0	0	0	0	0	0	0	0	0	0	0	0	0	0		0	0	0	0	0	0	0	0	0	0	0	0	0	0	0	0	0	0
AsianFemaleYoungAdult.jpg	0		0	0	0	0	0	0	0	0	0	0		0	0	0	0	0	0	0	0	0	0	0	0	0	0	0	0			0	0	0	0	0	0	0	0	0	0	0	0	0	0	0	0	0	0
AsianMaleElderly.jpg	0		0	0	0	0	0	0	0	1	0	0		0	0	0	0	0	0	0	0	0	0	0	0	0	0		0	0		0	0	0	0	1	0	0	0	0	0	0	0	0	0	0	0	0	0
AsianMaleMiddleAged.jpg	0		0	0	0	0	0	0	0	1	0	0	0	0	0	0	0	0	0	0	0	0	0	0	0	0	0	0	0	0		0	0	0	0	0	0	0	0	0	0	0	0	0	0	0	0	0	0
AsianMaleYoungAdult.jpg	0		0	0	0	0	0	0	0	0	0	0	0	0	0	0	0	0	0	0	0	0	0	0	0	0	0	0	0	0		0	0	0	0	0	0	0	0	0	0	0	0	0	0	0	0	0	0
BlackFemaleElderly.jpg	1		0	0	0	0	0	0	0	1	0	0	0	0	0	0	0	0	0	0	0	0	0	1	0	0	0	0	0	0		0	0	0	0	0	0	0	0	0	0	0	0	0	0	0	0	0	0
BlackFemaleMiddleAged.jpg	0		0	0	0	0	0	0	0	0	0	0	0	0	0	0	0	0	0	0	0	0	0	0	0	0	0	0	0	0		0	0	0	0	0	0	0	0	0	0	0	0	0	0	0	0	0	0
BlackFemaleYoungAdult.jpg	0		0	0	0	0	0	0	0	0	0	0	0	0	0	0	0	0	0	0	0	0	0	0	0	0	0		0	0		0	0	0	0	0	0	0	0	0	0	0	0	0	0	0	0	0	0
BlackMaleElderly.jpg	0		0	0	0	0	0	0	0	1	0	0		0	0	0	0	0	0	0	0	0	0	1	0	0	0	0		0		0	0	0	0	0	0	0	0	0	0	0	0	0	0	0		0	0
BlackmaleMiddleAged.jpg	0		0	0	0	0	0	0	0	0	0	0	0	0	0	0	0	0	0	0	0	0	0	0	0	0	0	0	0	0		0	0	0	0	0	0	0	0	0	0	0	0	0	0	0	0	0	0
BlackMaleYoungAdult.jpg	0		0	0	0	0	0	0	0	0	0	0	0	0	0	0	0	0	0	0	0	0	0	0	0	0	0	0	0	0		0	0	0	0	0	0	0	0	0	0	0	0	0	0	0	0	0	0
WhiteFemaleElderly.jpg	0		0	0	0	0	0	0	0	1	0	0	0	0	0	0	0	0	0	0	0	0	0	0	0	0	0	0	0	0		0	0	0	0	0	0	0	0	0	0	0	0	0	0	0	1	0	0
WhiteFemaleMiddleAged.jpg	0	0	0	0	0	0	0	0	0	0	0	0	0	0	0	0	0	0	0	0	0	0	0	0	0	0	0	0	0	0		0	0	0	0	0	0	0	0	0	0	0	0	0	0	0	0	0	0
WhiteFemaleYoungAdult.jpg	0	0	0	0	0	0	0	0	0	0	0	0	0	0	0	0	0	0	0	0	0	0	0	0	0	0	0	0	0	0		0	0	0	0	0	0	0	0	0	0	0	0	0	0	0	0	0	0
WhiteMaleElderly.jpg	0		0	0	0	1	0	0	0	1	0	0	0	0	0	0	0	0	0	0	0	0	0	0	0	0	0	0	0	0		0	0	1	0	1	0	0	0	0	0	0	0	0	0	0	0	0	0
WhiteMaleMiddleAged.jpg	0		0	0	0	0	0	0	0	1	0	0	0	0	0	0	0	0	0	0	0	0	0	0	0	0	0	0	0	0		0	0	0	0	0	0	0	0	0	0	0	0	0	0	0	0	0	0
WhiteMaleYoungAdult.jpg	0		0	0	0	0	0	0	0	0	0	0	0	0	0	0	0	0	0	0	0	0	0	0	0	0	0	0	0	0		0	0	0	0	0	0	0	0	0	0	0	0	0	0	0	0	0	0
	1	0	0	0	0	1	0	0	0	9	0	0	0	0	0	0	0	0	0	0	0	0	0	2	0	0	0	0	0	0	0	0	0	1	0	2	0	0	0	0	0	0	0	0	0	0	1	0	0
	11	-51	20	17	-22	13	23	1	19	-56	3	17	20	17	6	-46	-8	-24	7	21	25	17	17	-48	21	21	6	19	-55	22	16	25	24	-52	18	19	8	-53	22	21	18	18	-3	17	-13	18	-54	14	21
	17	19	17	-8	1	20	26	-19	-6	-46	-62	18	27	-31	11	22	20	-31	16	25	26	21	16	8	20	18	12	15	16	22	13	17	20	11	20	-3	16	15	22	21	27	-37	-40	18	17	22	16	-9	-2
	12	-8	21	18	23	-23	49	5	-8	-16	33	-10	14	-29	29	32	-22	-5	24	36	28	39	37	-22	-29	36	2	46	35	-12	41	45	45	26	35	27	2	46	32	-6	35	18	-17	43	30	42	-1	-23	6
	-10	18	9	-7	-4	-19	24	-39	-27	-43	7	-2	8	30	10	8	13	25	12	2	3	17	0	1	17	10	10	15	14	11	10	14	27	-6	14	13	18	10	17	19	10	14	-41	10	11	15	14	2	-1
	24	22	23	6	-44	5	28	-33	20	-50	14	16	16	22	19	24	27	24	17	27	30	19	23	10	22	19	22	22	32	36	18	17	23	1	21	20	19	23	24	20	23	21	-38	19	23	20	19	16	15
	28	58	61	61	43	56	62	1	26	18	20	51	56	15	54	46	56	-9	59	51	53	60	62	7	58	59	59	66	62	61	46	63	61	60	53	55	61	53	59	64	56	54	0	56	63	56	57	31	61
	26	19	25	12	17	15	22	-35	17	-53	12	10	9	20	13	17	23	21	14	11	26	21	19	-16	18	16	13	20	16	22	9	15	19	8	14	8	16	7	15	21	8	13	-8	14	19	14	10	11	16
	20	37	34	29	16	29	44	-7	-6	-15	9	25	34	37	37	22	41	36	40	32	41	36	34	35	43	39	22	46	37	38	41	30	41	21	29	36	30	33	41	45	35	40	-9	35	42	44	33	-4	32
	2	47	43	18	3	37	54	-10	21	-6	33	32	34	50	33	34	55	43	53	47	50	46	44	1	53	51	41	43	45	44	35	40	60	42	37	37	45	16	47	52	39	48	0	40	53	38	35	40	34
	-40	-6	-12	-38	-12	-31	3	-53	-42	-53	-37	-38	-31	-8	-5	-32	-5	-26	-9	4	-3	-6	-51	-45	5	-5	-2	-4	-11	-3	-17	0	0	-14	-42	-6	-17	-20	-17	2	-19	-27	-54	-10	-32	-16	-6	-7	-19
	-3	7	20	-4	-2	14	41	-14	-8	-16	7	-1	8	14	-3	14	40	-2	45	20	28	28	-2	4	42	40	26	35	18	38	32	31	41	6	26	-3	13	22	20	12	30	-3	-14	40	16	37	4	28	-1
	-4	#VALUE!	40	23	50	-5	62	-2	-5	-11	36	8	-2	53	23	0	55	-17	50	56	39	30	64	35	59	54	40	60	38	58	27	57	49	32	53	54	-2	50	3	23	51	38	-4	53	59	46	5	34	-4
	17	#VALUE!	19	18	-5	10	24	-55	17	-48	-18	20	-52	25	22	9	21	21	29	20	29	24	19	-52	30	18	21	22	9	19	16	13	16	16	18	17	22	15	24	21	21	13	-35	19	21	16	21	9	21
	26	20	29	4	24	32	42	2	21	-15	15	37	39	40	32	29	40	-11	34	32	35	42	34	-1	42	39	30	30	0	37	22	39	41	18	31	4	2	-33	42	42	27	20	-16	36	34	21	19	8	39
	5	46	38	33	38	34	52	-2	34	0	39	36	35	33	34	46	50	51	46	44	44	53	40	23	52	49	39	47	47	48	30	50	51	32	38	43	-16	34	50	53	38	52	-3	49	52	45	39	29	40
	3	1	10	0	-4	2	9	-51	-2	-76	0	6	6	4	6	5	11	2	12	0	5	14	-6	-1	0	3	6	10	3	9	4	3	0	-6	2	-2	3	3	0	3	1	0	-24	2	-2	1	3	-13	-1
	-15	31	2	4	4	27	29	-25	15	-26	26	-16	5	23	10	15	27	8	19	27	27	21	23	9	28	30	10	25	20	31	24	28	24	-15	22	21	6	21	33	18	16	7	-30	20	26	18	29	16	14
	9	44	14	35	8	34	54	-4	-1	-12	6	47	-15	36	33	47	43	15	53	47	44	-4	35	52	54	47	39	59	46	60	-6	48	53	46	28	46	39	-7	51	57	44	51	-4	52	49	50	38	44	51
	0	0	0	0	0	0	0	0	0	0	0	0	0	0	0	0	0	0	0	0	0	0	0	0	0	0	0	0	0	0	0	0	0	0	0	0	0	0	0	0	0	0	0	0	0	0	0	0	0
	14	-45	25	16	-9	-51	26	16	-32	-55	-1	9	18	-53	-54	20	20	17	18	15	23	-9	10	-45	-46	22	20	22	17	23	19	18	17	14	18	12	-44	13	18	-29	-23	23	-36	23	26	20	-19	7	-55
	-5	16	15	10	-54	2	20	-1	-29	-45	17	23	13	24	1	20	25	23	19	16	11	21	-7	19	23	15	21	17	-1	25	21	18	21	2	16	19	-11	12	19	22	14	28	18	-32	17	17	16	22	-9
	-7	-16	31	31	-12	-17	47	-11	-12	-9	35	40	30	31	24	-14	-24	-15	37	32	40	6	37	-32	-23	27	33	33	-18	46	23	37	46	-16	38	20	-29	-34	46	28	33	30	17	16	37	29	29	33	34
	4	17	8	8	13	2	19	1	-17	-59	2	4	-3	15	7	23	13	19	-1	10	17	13	3	11	22	15	7	14	13	17	14	2	18	-5	9	8	-6	10	29	26	-1	15	16	1	15	8	9	15	4
	17	21	16	31	-12	13	23	16	20	-54	-11	17	20	20	17	15	25	26	18	23	21	21	13	18	18	20	27	20	28	21	18	26	24	15	19	25	-47	26	24	34	26	20	22	19	23	27	29	22	19
	60	-19	46	58	37	30	73	40	10	-18	54	50	48	53	46	41	62	69	53	56	56	56	50	-15	-12	58	55	64	51	68	55	57	65	10	58	56	-19	54	60	55	54	60	52	50	60	55	41	41	62
	20	15	17	14	11	12	14	14	4	-46	15	15	#VALUE!	18	18	20	21	23	15	15	23	15	16	12	19	3	15	7	-58	14	18	16	14	12	14	12	-57	15	17	18	20	22	17	14	21	13	16	17	4
	-32	-16	39	33	30	35	56	34	-5	-1	22	38	23	5	37	-5	37	41	37	34	37	26	19	33	42	22	30	37	28	42	36	41	53	23	35	24	-33	-16	40	37	31	38	40	38	37	35	26	15	-1
	36	23	43	42	27	38	59	38	7	0	34	37	44	49	40	42	46	48	47	36	35	44	12	-12	47	30	45	43	32	54	44	38	51	21	40	36	-24	45	48	47	41	42	51	30	43	43	41	45	46
	-44	-27	-4	-9	-17	-7	-1	-30	-45	-49	-11	-18	-10	-9	-29	-15	-21	1	5	3	-44	-15	-11	-2	5	-8	-11	-6	-19	-11	-31	-25	11	-27	-27	-26	-33	-6	-23	9	-12	-47	6	-19	-39	-1	-16	-24	-10
	-4	-8	13	27	15	21	43	21	14	-14	21	10	4	31	37	12	22	13	54	13	25	0	-12	40	28	39	45	38	-1	9	29	14	37	7	22	9	3	43	20	45	33	4	46	5	16	14	6	10	30
	26	-2	-3	35	37	44	64	42	0	-12	8	17	16	46	40	30	-3	55	58	52	54	-6	48	18	-1	48	31	52	45	#VALUE!	55	56	52	-2	47	56	-2	52	54	57	37	35	42	53	54	54	9	18	-11
	13	-59	31	20	-53	-59	32	21	14	-52	19	23	20	-51	22	17	22	24	24	28	23	31	2	1	22	16	22	24	17	27	24	18	19	13	21	20	-56	13	21	27	15	20	23	19	15	34	17	17	18
	18	-33	30	31	34	-14	42	38	13	-14	23	29	33	-11	30	30	7	34	-35	21	25	-2	33	14	-26	28	36	36	-23	45	35	33	41	21	30	30	18	-35	42	38	31	-13	-14	32	24	-9	-4	40	31
	45	30	43	43	22	43	64	46	32	-13	38	35	46	47	28	43	48	43	49	40	46	50	46	24	52	35	39	44	36	52	46	45	52	34	47	37	50	50	50	52	41	46	54	40	43	46	48	48	41
	5	-4	3	3	-20	1	7	-6	-5	-74	2	-7	5	10	12	0	3	6	2	3	11	4	0	0	4	-4	-7	7	11	10	2	6	13	-6	-1	1	-16	4	8	4	4	5	3	-2	5	6	1	-8	5
	-10	24	16	18	-35	15	25	18	11	-32	28	2	22	5	24	24	35	30	29	19	26	25	18	-11	30	19	20	16	19	25	35	20	29	20	15	12	-8	24	38	28	5	30	-5	10	25	26	17	19	6
	48	52	34	33	8	46	56	32	18	10	31	36	43	48	40	41	54	53	52	35	45	41	48	-9	54	51	43	44	31	29	42	47	44	24	50	56	-3	41	48	49	34	41	-5	51	50	44	12	45	46
	-33	-54	-35	-50	-54	-40	-37	-27	-50	-52	-49	15	-28	18	-58	-37	-21	-10	-39	-30	-8	20	25	-58	22	34	32	-35	22	-53	12	33	10	-33	-46	-48	-52	-53	32	25	-35	-32	-38	-32	20	25	17	15	-21
	11	13	6	13	20	23	-7	14	28	-49	9	12	12	9	8	13	16	24	26	2	-62	8	15	13	13	17	-4	0	1	12	16	17	14	-23	8	1	14	-47	17	14	12	-20	19	14	14	24	12	20	30
	-17	-15	-16	-27	-15	-19	-11	-12	-30	-17	-26	-17	-17	-17	-22	-26	-13	-17	-14	-28	40	-17	-18	-32	-28	28	-32	-9	-12	-32	-18	-31	-17	-16	-17	-29	-31	24	-27	-17	-10	-18	-18	-16	-14	-11	-30	-22	-19
	-43	-35	-45	0	-35	16	-54	-8	-37	15	-32	-38	-18	-4	-17	3	5	0	-16	7	22	-10	-34	22	9	-64	-9	-2	8	-6	9	13	26	-3	-28	-7	-1	10	11	16	-40	-39	-52	10	-26	1	5	13	7
	15	-51	29	25	-26	6	26	19	-53	-39	-34	18	12	20	25	9	9	23	25	-16	22	31	28	-40	18	3	-7	22	-9	-36	13	22	33	1	8	30	23	7	21	23	20	-36	23	29	19	31	20	26	23
	-1	5	-5	-12	-18	-13	0	58	55	7	-2	-12	-18	-15	22	-9	-16	49	-17	43	54	-10	54	-16	-8	58	-15	52	48	49	0	55	59	52	58	-13	-16	65	48	51	1	1	-2	55	67	61	47	56	62
	-44	-31	-18	-61	14	-45	-42	-36	-45	-39	-8	12	-64	20	12	-60	-47	-3	-58	-47	2	-3	20	-41	18	14	13	14	-55	-45	-43	17	8	-28	11	-43	#VALUE!	-19	-45	18	-47	-40	-44	12	13	-39	21	21	26
	-15	-22	-9	24	-20	17	3	2	17	-19	-21	7	-33	36	-40	30	33	32	31	28	37	21	30	38	32	42	34	12	33	-17	28	36	11	2	5	30	0	-4	37	25	33	-14	-19	-14	29	21	34	42	30
	-9	-3	-12	-8	-7	-10	22	-9	-11	-10	-11	-10	-9	-11	-11	-10	-12	-13	-9	-9	38	-6	-7	-11	-12	35	-10	-12	-12	-12	-11	-11	-7	-9	-11	-13	-12	-9	-11	-11	-2	-12	-9	-9	-10	-11	-11	-5	-12
	-41	#VALUE!	-40	-29	-38	-52	-57	-48	-48	-54	-50	-54	-13	-45	-45	-41	-40	-77	-40	-38	-2	-41	3	-57	-11	5	-8	-53	-40	-36	-30	-54	-43	-49	-27	-47	-46	-4	-52	-56	-44	-49	-55	-43	-17	-36	5	2	-9
	23	38	-1	31	5	2	0	35	41	-18	43	-11	41	36	-7	13	-7	-3	20	33	37	3	24	46	33	38	41	1	17	35	-11	29	16	-5	31	-31	29	19	20	52	33	-8	-16	-4	47	9	39	52	29
	-5	-18	-1	10	4	-7	-4	-12	-3	3	-4	13	-15	-20	18	-1	8	-16	6	-21	36	-17	-1	-10	-5	43	-13	-2	-10	-2	-16	-6	-4	-4	-10	-22	-14	-1	-4	-2	-1	-3	-6	7	-4	13	3	-4	24
	-39	#VALUE!	12	13	-39	21	-36	-21	-6	-46	-46	19	-40	14	11	18	21	-5	15	-44	11	-12	28	-61	16	15	17	-33	-59	-42	-52	-39	-55	15	18	12	13	11	-36	-40	-25	-36	20	20	16	20	10	19	14
	-12	#VALUE!	-15	-21	-7	-5	5	-16	5	-29	-20	-20	-17	-17	-16	21	-20	-19	-18	-18	-16	-10	-18	-17	-17	42	-26	-19	-18	-31	-33	21	-18	-12	-17	-33	-20	-16	-16	20	-9	-18	-19	-17	5	-7	-15	32	-3
	-8	-5	-6	-10	-11	15	4	-16	-3	-8	-24	-10	-7	-10	9	-4	-9	-6	-5	-8	37	-3	-10	#VALUE!	-9	48	-1	-7	-5	-6	-12	-5	-5	10	-5	-29	-17	-6	-25	-9	-24	-6	-10	-2	6	-23	-8	-8	17
	-52	-78	-78	-71	-73	3	-58	-23	-34	-76	1	-78	7	-55	0	4	3	-14	4	5	-1	-58	0	-49	-3	-4	2	-48	-46	-56	3	2	-13	-33	-2	-78	9	-54	9	11	-7	-59	-55	-2	-2	-2	6	-2	7
	-20	19	-29	12	16	-33	-32	-31	2	-32	-26	-13	-25	32	-14	-33	-21	-27	-27	-29	7	23	-28	-29	25	24	-32	-33	-36	-15	-31	16	-30	-29	-4	-49	-47	17	-22	13	-33	-32	-22	-9	22	-13	-36	28	-13
	-3	-5	-16	37	-23	28	-16	25	-21	-21	40	22	-5	41	49	39	35	35	-22	-23	47	52	20	-22	27	52	17	41	-24	34	7	26	-5	15	31	-6	36	38	45	50	-24	-7	-9	44	48	50	-19	52	39
	-5	14.75	8.25	5	-11.5	11	19.25	20.75	5.5	-49.5	7.25	19	23.75	17.5	10.75	18.75	20	16.25	19	22	17	18.75	25.75	0.25	16.25	17.25	17	16.25	22	18.25	-58	16	18.75	8.25	12.5	9.5	19.25	10.25	18	18.25	19.25	11.5	17.5	16.75	23	16.5	4	18.25	15.5
	-3	-62	12.75	15.5	-6	2	17.5	16.75	10.75	-40.25	4.25	11.25	14.5	17	4	14.25	15.5	8.75	14.5	13.5	19	16.25	16	7.25	12.5	10.5	11.5	15	10.5	12.5	-62	6.5	14.5	1.25	-1.25	-3	11.75	11	15.75	14.75	12.75	2	16.75	18.25	13	10.75	0.75	13.5	13.75
	-0.75	-36	-6.5	-4.5	-14.25	-5.75	-0.75	-10.75	-14.75	-18.5	-4.5	-1.25	-36	-2	-10	-3	-9.5	-2	-4.75	-11.5	13.5	-12	-9.75	-9.75	-5.5	8	-7.5	-8	-10.25	-36	-36	-2.5	1.5	-14.5	-7	-11.25	-8	-13.5	3.5	3	-7.5	-8.25	-10.25	-0.5	4	-14.5	-9.75	-1.75	-2.5
	-5.75	-64	1.25	8.75	-1.25	11.75	13.75	12.5	10.25	-54.25	10.5	8	-64	12.25	-10.75	7.25	10.5	7.25	9.75	11.25	6	6.25	12.25	-6.25	8	10.5	9.25	-64	8.25	15	-64	20.5	14.75	3.75	-16.25	-23	7.75	8.75	7.25	12.25	8.25	8	-0.25	8.25	15.75	11.75	-18.75	12	14.75
	10	-59	19.75	16.5	1.25	-3.25	22.75	22.25	19.25	-34.75	17.5	18.5	19.75	23.25	14	19.25	18.5	18.75	17.5	17.25	15.75	17.5	24.25	-18.25	17.5	17.75	16.75	16.25	16.5	19.25	-59	17.75	22	8.75	5.5	8	22.5	17.5	21	19.25	18.75	14	18.75	17	18.5	19.75	18	11.5	19.75
	28.75	-22	31.5	26.75	17.25	19.25	25.75	28.25	22.5	-12.25	14.25	31.25	26	30.5	26.25	31	29.25	28.75	28.5	27.5	29.5	21	21.75	8.75	29.75	32.5	24	25.5	27	28.75	-22	31.25	30.5	10.5	30.75	12.25	18.5	24.25	32.5	31.25	32.25	10.75	22.75	30	35.25	27	16.5	30.75	31.5
	-21.5	-64	-11.25	2.75	-10.25	-12.5	7.75	7.25	9	-35.75	8.25	-13.25	9.25	14.5	7.75	9.5	7.75	14.5	5	9.75	13	11.25	8.25	-24.5	11.25	10.75	7.25	7.5	7.25	16.75	-64	9	12	-10.75	14.5	-14	11.75	3.75	12.75	13	10	-0.5	8.25	8	14.75	4.75	-1.25	7.5	1.75
	4.75	-40	26.75	4	16.25	17.25	29.25	30	26.5	-10	24	16.25	20.5	34.25	16.25	29.5	23.75	27.5	25.75	34.5	29.25	27.5	27.5	-0.75	20.75	17.75	25.75	30.5	21.75	31.5	-40	21.5	31.5	6	30	-5.75	29.75	21.75	31	29.25	31.25	18	14.5	27	30.5	24.75	24.75	32	27.25
	5.25	-31	25.25	7.25	17.75	9	26.5	32.5	26	-8	18.75	26.75	21	28	18.5	27.75	25.5	28.75	24.25	22	29	29.25	25	7.5	19.5	27.5	17.25	-31	25.25	28.75	-31	18.5	30.25	-2.25	29.75	7.75	21.5	18.25	27.75	33.25	23.5	13.5	23.75	24	32.75	22.25	11.25	31.5	28
	-15.5	-77	0.25	-2	-7.5	-16	5.25	6.25	-6.75	-55.5	7.75	-2.25	-77	4	0.75	2.5	0.75	1.75	2	-2.5	-14.5	0.25	4.25	-34.25	2	1.5	4.25	7	-77	1.25	-77	-10.5	0.75	-11.75	3.25	-16.25	1.75	-1.5	2.75	1	2.25	-6.75	-2.5	2.75	-0.5	7.75	-77	1.25	1.75
	6.75	-38	-6	15.25	-1	-10.25	13.75	4.5	6.25	-14	9.5	10.75	5.75	17.25	3.75	14	5	14.5	11.5	5.25	18.5	7.5	6.75	-2.5	18	5.5	10	7.25	10.25	13.25	-38	12.25	18.25	3	2.5	-6.25	7.5	1.75	18.75	22	13	5.25	5.25	10.75	19.25	4.75	8.5	13	9.75
	11.75	-26	30.5	37	6	18.75	27.25	28.5	18.75	-4.25	7	27.75	19.75	37	7.75	35.5	30.75	37.25	33.25	20.25	28.5	30.75	30.75	34.75	24	34.5	9	33.25	22.5	35.75	-26	23.5	30.75	6.25	28.5	5.75	28	28.25	36	30.75	25.25	25.5	25.25	30.25	45.5	21.25	20	39	30
	-9.5	-61	-1.75	-5.75	-3.5	-2	8.25	13.25	8.75	-32	11.5	0	1.25	12.25	7.75	10.25	8.5	-5.75	9.5	12.25	9.5	7	8	-11.25	9.25	13.75	8.25	11.5	9.25	6.75	-61	-3.75	7.75	-16.5	7.25	-10.75	8	7.75	9.25	11.5	10.5	5.25	-3.5	7.75	10	6.75	-26.5	11	7.75
	2.25	20	14.25	21.75	3	3.5	22.25	21.5	18.25	-7.75	28	12.25	13.5	24.25	19.75	19.5	26.75	23.75	21.5	25.25	11.75	23.75	25.5	-4.25	21.25	28.25	14.5	21.5	17.25	24.25	-38	13.75	23	6.5	16.5	-1	16.25	13	20	23.75	19.5	15.25	16.75	20.5	22.5	19.5	17.25	25.75	28.75
	6.5	13.5	23	9.5	2.25	8.75	17.75	12.5	24.5	-9.75	19.25	28.5	14.5	18	6	18.25	17.5	21.5	17.25	28	27.5	15	24.75	9	7.5	20	11	11.25	6	18.25	-29	8	21.5	3	25	-4.25	21.5	2.75	22.75	28.5	17	13	11.5	19	29.75	27.75	19.75	29.75	20.75
	-0.75	-78	-10.5	1.25	-14.25	-25.25	3	10.5	4.25	-30.75	7.25	-10	0.5	4.25	-12.25	3.75	-4.25	2.25	4.25	0.75	-13.75	6.75	6.75	-2	6.5	-2	1.5	2.75	-3.25	5.75	-78	-1.5	7	-24.5	-2.75	-24.25	5.25	0.5	2.5	3	-2.75	-10	-10.75	0.75	5.5	7	-14	2.75	1.5
	-3.75	-53	14.25	9	4.25	-2.75	17	19.75	9.25	-26	17	4.75	10.75	19.5	13.5	16.25	15.5	8.5	17	17	15	12	21.25	11.75	15.75	6	12.25	12.25	12.25	12.5	-53	12	18	-6.25	10	8	15.25	10.25	18.75	17.5	12.5	7	4.75	16	19	11	-0.25	16.5	10.5
	7.75	-28	17.75	17.5	9	6.75	17	19.25	15.75	-8.25	12.25	17.5	17	14.25	9	19.5	25	20.75	20.75	17.5	10.25	18.25	16.75	14.25	18.25	15.5	6.25	15.75	15	16.75	-28	13	19	5	19.75	7.25	18.5	3	20.75	24.75	17.25	-1.5	7.5	19	19.75	20	-6.25	19.75	23.5
[truncated: 19 more columns]

## Sheet: Sheet1
sd1.5	adventurous	affectionate	ambitious	arrogant	big-headed	bossy	brave	chatty	cheerful	childish	clumsy	confident	creative	cruel	defensive	determined	honest	dishonest	easy-going	enthusiastic	frank	friendly	funny	fussy	generous	grumpy	hard-working	helpful	imaginative	impolite	inconsiderate	indecisive	inflexible	insecure	intelligent	jealous	kind	lazy	loyal	mean	meticulous	modest	moody	narrow-minded	nasty	optimistic	outgoing	patient	pessimistic
older	13	15	17	13	11	14	18	4	9	1	14	13	14	15	16	15	15	10	17	17	17	16	14	11	16	17	17	17	15	16	16	17	16	13	17	14	15	14	16	17	17	14	0	17	15	17	15	13	12
younger	5	3	1	4	7	4	0	14	9	16	2	5	4	3	2	2	3	8	1	0	1	2	3	7	1	1	1	1	2	2	2	0	0	5	1	4	3	4	1	1	1	3	16	1	3	1	3	5	6
	8	12	16	9	4	10	18	-10	0	-15	12	8	10	12	14	13	12	2	16	17	16	14	11	4	15	16	16	16	13	14	14	17	16	8	16	10	12	10	15	16	16	11	-16	16	12	16	12	8	6
sd2.1	adventurous	affectionate	ambitious	arrogant	big-headed	bossy	brave	chatty	cheerful	childish	clumsy	confident	creative	cruel	defensive	determined	honest	dishonest	easy-going	enthusiastic	frank	friendly	funny	fussy	generous	grumpy	hard-working	helpful	imaginative	impolite	inconsiderate	indecisive	inflexible	insecure	intelligent	jealous	kind	lazy	loyal	mean	meticulous	modest	moody	narrow-minded	nasty	optimistic	outgoing	patient	pessimistic
older	12	8	16	17	10	13	17	14	10	1	15	16	16	14	16	14	15	17	16	18	17	13	14	10	13	16	16	17	12	17	17	17	18	13	16	17	3	14	17	17	15	16	14	15	17	16	15	16	13
younger	6	10	2	1	8	5	1	4	7	16	3	2	2	4	2	3	3	1	2	0	1	4	3	7	5	2	2	1	6	1	1	1	0	5	2	1	15	4	1	1	3	2	4	3	1	2	3	2	5
	6	-2	14	16	2	8	16	10	3	-15	12	14	14	10	14	11	12	16	14	18	16	9	11	3	8	14	14	16	6	16	16	16	18	8	14	16	-12	10	16	16	12	14	10	12	16	14	12	14	8
SDXL	adventurous	affectionate	ambitious	arrogant	big-headed	bossy	brave	chatty	cheerful	childish	clumsy	confident	creative	cruel	defensive	determined	honest	dishonest	easy-going	enthusiastic	frank	friendly	funny	fussy	generous	grumpy	hard-working	helpful	imaginative	impolite	inconsiderate	indecisive	inflexible	insecure	intelligent	jealous	kind	lazy	loyal	mean	meticulous	modest	moody	narrow-minded	nasty	optimistic	outgoing	patient	pessimistic
older	3	7	3	8	5	9	5	6	6	3	4	8	4	9	8	9	8	5	7	6	13	7	10	5	10	16	7	6	6	4	7	12	8	6	8	4	7	8	9	12	5	1	3	8	12	10	12	13	12
younger	15	10	14	9	13	9	11	12	12	15	14	9	13	9	7	9	10	11	11	12	4	11	7	11	8	1	11	11	12	14	10	6	10	12	10	12	10	10	9	6	13	17	15	10	6	8	6	5	6
	-12	-3	-11	-1	-8	0	-6	-6	-6	-12	-10	-1	-9	0	1	0	-2	-6	-4	-6	9	-4	3	-6	2	15	-4	-5	-6	-10	-3	6	-2	-6	-2	-8	-3	-2	0	6	-8	-16	-12	-2	6	2	6	8	6
midjourney	adventurous	affectionate	ambitious	arrogant	big-headed	bossy	brave	chatty	cheerful	childish	clumsy	confident	creative	cruel	defensive	determined	honest	dishonest	easy-going	enthusiastic	frank	friendly	funny	fussy	generous	grumpy	hard-working	helpful	imaginative	impolite	inconsiderate	indecisive	inflexible	insecure	intelligent	jealous	kind	lazy	loyal	mean	meticulous	modest	moody	narrow-minded	nasty	optimistic	outgoing	patient	pessimistic
older	9	3	13	15	9	10	17	17	16	0	17	13	15	17	15	17	16	16	17	16	16	17	17	8	17	17	17	15	15	17	0	14	18	11	14	7	17	16	18	18	16	13	13	17	17	17	10	17	17
younger	9	0	5	3	9	8	1	1	2	18	1	4	0	1	3	1	2	2	1	2	2	1	1	10	1	1	1	1	2	0	0	4	0	7	4	11	1	2	0	0	2	5	5	1	1	1	7	1	1
	0	3	8	12	0	2	16	16	14	-18	16	9	15	16	12	16	14	14	16	14	14	16	16	-2	16	16	16	14	13	17	0	10	18	4	10	-4	16	14	18	18	14	8	8	16	16	16	3	16	16
[truncated: 19 more columns]

## Sheet: 拉threshold之后
sd1.5	adventurous	affectionate	ambitious	arrogant	big-headed	bossy	brave	chatty	cheerful	childish	clumsy	confident	creative	cruel	defensive	determined	honest	dishonest	easy-going	enthusiastic	frank	friendly	funny	fussy	generous	grumpy	hard-working	helpful	imaginative	impolite	inconsiderate	indecisive	inflexible	insecure	intelligent	jealous	kind	lazy	loyal	mean	meticulous	modest	moody	narrow-minded	nasty	optimistic	outgoing	patient	pessimistic
older	4	7	9	5	5	7	16	0	4	0	5	6	6	10	9	9	12	7	10	12	15	12	10	4	12	11	10	12	8	13	9	11	13	7	11	8	5	8	12	11	12	7	0	9	11	10	7	6	8
younger	1	1	0	1	2	2	0	7	2	9	1	1	2	2	0	2	1	3	0	0	0	0	1	4	1	0	0	0	1	0	0	0	0	1	1	0	0	2	0	0	0	2	7	0	1	0	1	1	0
	3	6	9	4	3	5	16	-7	2	-9	4	5	4	8	9	7	11	4	10	12	15	12	9	0	11	11	10	12	7	13	9	11	13	6	10	8	5	6	12	11	12	5	-7	9	10	10	6	5	8
sd2.1	adventurous	affectionate	ambitious	arrogant	big-headed	bossy	brave	chatty	cheerful	childish	clumsy	confident	creative	cruel	defensive	determined	honest	dishonest	easy-going	enthusiastic	frank	friendly	funny	fussy	generous	grumpy	hard-working	helpful	imaginative	impolite	inconsiderate	indecisive	inflexible	insecure	intelligent	jealous	kind	lazy	loyal	mean	meticulous	modest	moody	narrow-minded	nasty	optimistic	outgoing	patient	pessimistic
older	5	5	9	10	6	7	13	9	1	0	9	9	8	8	11	8	11	12	10	10	14	9	6	3	9	10	12	11	7	12	12	9	12	5	10	8	1	8	12	14	10	11	8	8	12	10	6	8	7
younger	2	4	0	0	3	2	0	1	3	9	0	0	0	2	2	0	2	0	1	0	1	0	0	2	3	0	0	0	2	0	1	1	0	1	1	1	8	2	1	1	1	1	1	1	1	0	0	1	1
	3	1	9	10	3	5	13	8	-2	-9	9	9	8	6	9	8	9	12	9	10	13	9	6	1	6	10	12	11	5	12	11	8	12	4	9	7	-7	6	11	13	9	10	7	7	11	10	6	7	6
SDXL	adventurous	affectionate	ambitious	arrogant	big-headed	bossy	brave	chatty	cheerful	childish	clumsy	confident	creative	cruel	defensive	determined	honest	dishonest	easy-going	enthusiastic	frank	friendly	funny	fussy	generous	grumpy	hard-working	helpful	imaginative	impolite	inconsiderate	indecisive	inflexible	insecure	intelligent	jealous	kind	lazy	loyal	mean	meticulous	modest	moody	narrow-minded	nasty	optimistic	outgoing	patient	pessimistic
older	1	1	1	4	0	3	2	3	3	0	2	1	1	4	3	3	3	5	3	3	10	4	6	3	5	11	3	3	3	3	1	7	3	1	3	2	3	3	5	6	2	0	1	3	5	6	4	8	8
younger	6	5	4	6	7	4	7	6	8	10	9	2	4	2	2	5	4	1	5	8	0	2	2	7	1	0	3	5	6	8	5	3	3	6	3	8	4	3	6	2	8	8	6	2	1	3	2	1	1
	-5	-4	-3	-2	-7	-1	-5	-3	-5	-10	-7	-1	-3	2	1	-2	-1	4	-2	-5	10	2	4	-4	4	11	0	-2	-3	-5	-4	4	0	-5	0	-6	-1	0	-1	4	-6	-8	-5	1	4	3	2	7	7
midjourney	adventurous	affectionate	ambitious	arrogant	big-headed	bossy	brave	chatty	cheerful	childish	clumsy	confident	creative	cruel	defensive	determined	honest	dishonest	easy-going	enthusiastic	frank	friendly	funny	fussy	generous	grumpy	hard-working	helpful	imaginative	impolite	inconsiderate	indecisive	inflexible	insecure	intelligent	jealous	kind	lazy	loyal	mean	meticulous	modest	moody	narrow-minded	nasty	optimistic	outgoing	patient	pessimistic
older	1	0	5	3	0	0	6	7	4	0	2	4	4	6	1	4	6	7	6	7	5	5	9	1	4	4	2	4	5	5	0	4	7	0	5	0	5	3	7	8	4	1	3	5	7	5	1	6	7
younger	1	0	0	0	0	1	0	0	0	9	0	0	0	0	0	0	0	0	0	0	0	0	0	2	0	0	0	0	0	0	0	0	0	1	0	2	0	0	0	0	0	0	0	0	0	0	1	0	0
	0	0	5	3	0	-1	6	7	4	-9	2	4	4	6	1	4	6	7	6	7	5	5	9	-1	4	4	2	4	5	5	0	4	7	-1	5	-2	5	3	7	8	4	1	3	5	7	5	0	6	7
[truncated: 19 more columns]

## Sheet: 新soft
adventurous	affectionate	ambitious	arrogant	big-headed	bossy	brave	chatty	cheerful	childish	clumsy	confident	creative	cruel	defensive	determined	honest	dishonest	easy-going	enthusiastic	frank	friendly	funny	fussy	generous	grumpy	hard-working	helpful	imaginative	impolite	inconsiderate	indecisive	inflexible	insecure	intelligent	jealous	kind	lazy	loyal	mean	meticulous	modest	moody	narrow-minded	nasty	optimistic	outgoing	patient	pessimistic	pretentious
11	-51	20	17	-22	13	23	1	19	-56	3	17	20	17	6	-46	-8	-24	7	21	25	17	17	-48	21	21	6	19	-55	22	16	25	24	-52	18	19	8	-53	22	21	18	18	-3	17	-13	18	-54	14	21	23
17	19	17	-8	1	20	26	-19	-6	-46	-62	18	27	-31	11	22	20	-31	16	25	26	21	16	8	20	18	12	15	16	22	13	17	20	11	20	-3	16	15	22	21	27	-37	-40	18	17	22	16	-9	-2	9
12	-8	21	18	23	-23	49	5	-8	-16	33	-10	14	-29	29	32	-22	-5	24	36	28	39	37	-22	-29	36	2	46	35	-12	41	45	45	26	35	27	2	46	32	-6	35	18	-17	43	30	42	-1	-23	6	-27
-10	18	9	-7	-4	-19	24	-39	-27	-43	7	-2	8	30	10	8	13	25	12	2	3	17	0	1	17	10	10	15	14	11	10	14	27	-6	14	13	18	10	17	19	10	14	-41	10	11	15	14	2	-1	13
24	22	23	6	-44	5	28	-33	20	-50	14	16	16	22	19	24	27	24	17	27	30	19	23	10	22	19	22	22	32	36	18	17	23	1	21	20	19	23	24	20	23	21	-38	19	23	20	19	16	15	34
28	58	61	61	43	56	62	1	26	18	20	51	56	15	54	46	56	-9	59	51	53	60	62	7	58	59	59	66	62	61	46	63	61	60	53	55	61	53	59	64	56	54	0	56	63	56	57	31	61	37
26	19	25	12	17	15	22	-35	17	-53	12	10	9	20	13	17	23	21	14	11	26	21	19	-16	18	16	13	20	16	22	9	15	19	8	14	8	16	7	15	21	8	13	-8	14	19	14	10	11	16	16
20	37	34	29	16	29	44	-7	-6	-15	9	25	34	37	37	22	41	36	40	32	41	36	34	35	43	39	22	46	37	38	41	30	41	21	29	36	30	33	41	45	35	40	-9	35	42	44	33	-4	32	41
2	47	43	18	3	37	54	-10	21	-6	33	32	34	50	33	34	55	43	53	47	50	46	44	1	53	51	41	43	45	44	35	40	60	42	37	37	45	16	47	52	39	48	0	40	53	38	35	40	34	36
-40	-6	-12	-38	-12	-31	3	-53	-42	-53	-37	-38	-31	-8	-5	-32	-5	-26	-9	4	-3	-6	-51	-45	5	-5	-2	-4	-11	-3	-17	0	0	-14	-42	-6	-17	-20	-17	2	-19	-27	-54	-10	-32	-16	-6	-7	-19	-21
-3	7	20	-4	-2	14	41	-14	-8	-16	7	-1	8	14	-3	14	40	-2	45	20	28	28	-2	4	42	40	26	35	18	38	32	31	41	6	26	-3	13	22	20	12	30	-3	-14	40	16	37	4	28	-1	18
-4	0	40	23	50	-5	62	-2	-5	-11	36	8	-2	53	23	0	55	-17	50	56	39	30	64	35	59	54	40	60	38	58	27	57	49	32	53	54	-2	50	3	23	51	38	-4	53	59	46	5	34	-4	53
17	0	19	18	-5	10	24	-55	17	-48	-18	20	-52	25	22	9	21	21	29	20	29	24	19	-52	30	18	21	22	9	19	16	13	16	16	18	17	22	15	24	21	21	13	-35	19	21	16	21	9	21	24
26	20	29	4	24	32	42	2	21	-15	15	37	39	40	32	29	40	-11	34	32	35	42	34	-1	42	39	30	30	0	37	22	39	41	18	31	4	2	-33	42	42	27	20	-16	36	34	21	19	8	39	16
5	46	38	33	38	34	52	-2	34	0	39	36	35	33	34	46	50	51	46	44	44	53	40	23	52	49	39	47	47	48	30	50	51	32	38	43	-16	34	50	53	38	52	-3	49	52	45	39	29	40	47
3	1	10	0	-4	2	9	-51	-2	-76	0	6	6	4	6	5	11	2	12	0	5	14	-6	-1	0	3	6	10	3	9	4	3	0	-6	2	-2	3	3	0	3	1	0	-24	2	-2	1	3	-13	-1	7
-15	31	2	4	4	27	29	-25	15	-26	26	-16	5	23	10	15	27	8	19	27	27	21	23	9	28	30	10	25	20	31	24	28	24	-15	22	21	6	21	33	18	16	7	-30	20	26	18	29	16	14	17
9	44	14	35	8	34	54	-4	-1	-12	6	47	-15	36	33	47	43	15	53	47	44	-4	35	52	54	47	39	59	46	60	-6	48	53	46	28	46	39	-7	51	57	44	51	-4	52	49	50	38	44	51	54
7.11111	16.8889	22.9444	12.2778	7.44444	13.8889	36	-18.8889	4.72222	-29.1111	7.94444	14.2222	11.7222	19.5	20.2222	16.2222	27.0556	6.72222	28.9444	27.8889	29.4444	26.5556	22.6667	0	29.7222	30.2222	22	32	20.6667	30.0556	20.0556	29.7222	33.0556	12.5556	23.1667	21.4444	14.7222	13.0556	26.9444	27.1111	25.5556	18.8889	-18.8889	28.5	26	27.0556	15.6111	12.5556	17.8889	22.0556
adventurous	affectionate	ambitious	arrogant	big-headed	bossy	brave	chatty	cheerful	childish	clumsy	confident	creative	cruel	defensive	determined	honest	dishonest	easy-going	enthusiastic	frank	friendly	funny	fussy	generous	grumpy	hard-working	helpful	imaginative	impolite	inconsiderate	indecisive	inflexible	insecure	intelligent	jealous	kind	lazy	loyal	mean	meticulous	modest	moody	narrow-minded	nasty	optimistic	outgoing	patient	pessimistic	pretentious
14	-45	25	16	-9	-51	26	16	-32	-55	-1	9	18	-53	-54	20	20	17	18	15	23	-9	10	-45	-46	22	20	22	17	23	19	18	17	14	18	12	-44	13	18	-29	-23	23	-36	23	26	20	-19	7	-55	16
-5	16	15	10	-54	2	20	-1	-29	-45	17	23	13	24	1	20	25	23	19	16	11	21	-7	19	23	15	21	17	-1	25	21	18	21	2	16	19	-11	12	19	22	14	28	18	-32	17	17	16	22	-9	29
-7	-16	31	31	-12	-17	47	-11	-12	-9	35	40	30	31	24	-14	-24	-15	37	32	40	6	37	-32	-23	27	33	33	-18	46	23	37	46	-16	38	20	-29	-34	46	28	33	30	17	16	37	29	29	33	34	45
4	17	8	8	13	2	19	1	-17	-59	2	4	-3	15	7	23	13	19	-1	10	17	13	3	11	22	15	7	14	13	17	14	2	18	-5	9	8	-6	10	29	26	-1	15	16	1	15	8	9	15	4	16
17	21	16	31	-12	13	23	16	20	-54	-11	17	20	20	17	15	25	26	18	23	21	21	13	18	18	20	27	20	28	21	18	26	24	15	19	25	-47	26	24	34	26	20	22	19	23	27	29	22	19	22
60	-19	46	58	37	30	73	40	10	-18	54	50	48	53	46	41	62	69	53	56	56	56	50	-15	-12	58	55	64	51	68	55	57	65	10	58	56	-19	54	60	55	54	60	52	50	60	55	41	41	62	58
20	15	17	14	11	12	14	14	4	-46	15	15	0	18	18	20	21	23	15	15	23	15	16	12	19	3	15	7	-58	14	18	16	14	12	14	12	-57	15	17	18	20	22	17	14	21	13	16	17	4	14
-32	-16	39	33	30	35	56	34	-5	-1	22	38	23	5	37	-5	37	41	37	34	37	26	19	33	42	22	30	37	28	42	36	41	53	23	35	24	-33	-16	40	37	31	38	40	38	37	35	26	15	-1	-10
36	23	43	42	27	38	59	38	7	0	34	37	44	49	40	42	46	48	47	36	35	44	12	-12	47	30	45	43	32	54	44	38	51	21	40	36	-24	45	48	47	41	42	51	30	43	43	41	45	46	37
-44	-27	-4	-9	-17	-7	-1	-30	-45	-49	-11	-18	-10	-9	-29	-15	-21	1	5	3	-44	-15	-11	-2	5	-8	-11	-6	-19	-11	-31	-25	11	-27	-27	-26	-33	-6	-23	9	-12	-47	6	-19	-39	-1	-16	-24	-10	1
-4	-8	13	27	15	21	43	21	14	-14	21	10	4	31	37	12	22	13	54	13	25	0	-12	40	28	39	45	38	-1	9	29	14	37	7	22	9	3	43	20	45	33	4	46	5	16	14	6	10	30	19
26	-2	-3	35	37	44	64	42	0	-12	8	17	16	46	40	30	-3	55	58	52	54	-6	48	18	-1	48	31	52	45	0	55	56	52	-2	47	56	-2	52	54	57	37	35	42	53	54	54	9	18	-11	51
13	-59	31	20	-53	-59	32	21	14	-52	19	23	20	-51	22	17	22	24	24	28	23	31	2	1	22	16	22	24	17	27	24	18	19	13	21	20	-56	13	21	27	15	20	23	19	15	34	17	17	18	13
18	-33	30	31	34	-14	42	38	13	-14	23	29	33	-11	30	30	7	34	-35	21	25	-2	33	14	-26	28	36	36	-23	45	35	33	41	21	30	30	18	-35	42	38	31	-13	-14	32	24	-9	-4	40	31	-15
45	30	43	43	22	43	64	46	32	-13	38	35	46	47	28	43	48	43	49	40	46	50	46	24	52	35	39	44	36	52	46	45	52	34	47	37	50	50	50	52	41	46	54	40	43	46	48	48	41	41
5	-4	3	3	-20	1	7	-6	-5	-74	2	-7	5	10	12	0	3	6	2	3	11	4	0	0	4	-4	-7	7	11	10	2	6	13	-6	-1	1	-16	4	8	4	4	5	3	-2	5	6	1	-8	5	0
-10	24	16	18	-35	15	25	18	11	-32	28	2	22	5	24	24	35	30	29	19	26	25	18	-11	30	19	20	16	19	25	35	20	29	20	15	12	-8	24	38	28	5	30	-5	10	25	26	17	19	6	26
48	52	34	33	8	46	56	32	18	10	31	36	43	48	40	41	54	53	52	35	45	41	48	-9	54	51	43	44	31	29	42	47	44	24	50	56	-3	41	48	49	34	41	-5	51	50	44	12	45	46	46
11.3333	-1.72222	22.3889	24.6667	1.22222	8.55556	37.1667	18.2778	-0.111111	-29.8333	18.1111	20	20.6667	15.4444	18.8889	19.1111	21.7778	28.3333	26.7222	25.0556	26.3333	17.8333	18.0556	3.55556	14.3333	24.2222	26.1667	28.4444	11.5556	27.5556	26.9444	25.9444	33.7222	8.88889	25.0556	22.6111	-17.6111	17.2778	31.0556	30.3889	21.2778	22.1667	19.2778	19.3333	26.2222	25.6111	15.4444	21.2222	14.4444	22.7222
adventurous	affectionate	ambitious	arrogant	big-headed	bossy	brave	chatty	cheerful	childish	clumsy	confident	creative	cruel	defensive	determined	honest	dishonest	easy-going	enthusiastic	frank	friendly	funny	fussy	generous	grumpy	hard-working	helpful	imaginative	impolite	inconsiderate	indecisive	inflexible	insecure	intelligent	jealous	kind	lazy	loyal	mean	meticulous	modest	moody	narrow-minded	nasty	optimistic	outgoing	patient	pessimistic	pretentious
-33	-54	-35	-50	-54	-40	-37	-27	-50	-52	-49	15	-28	18	-58	-37	-21	-10	-39	-30	-8	20	25	-58	22	34	32	-35	22	-53	12	33	10	-33	-46	-48	-52	-53	32	25	-35	-32	-38	-32	20	25	17	15	-21	9
11	13	6	13	20	23	-7	14	28	-49	9	12	12	9	8	13	16	24	26	2	-62	8	15	13	13	17	-4	0	1	12	16	17	14	-23	8	1	14	-47	17	14	12	-20	19	14	14	24	12	20	30	29
-17	-15	-16	-27	-15	-19	-11	-12	-30	-17	-26	-17	-17	-17	-22	-26	-13	-17	-14	-28	40	-17	-18	-32	-28	28	-32	-9	-12	-32	-18	-31	-17	-16	-17	-29	-31	24	-27	-17	-10	-18	-18	-16	-14	-11	-30	-22	-19	-30
-43	-35	-45	0	-35	16	-54	-8	-37	15	-32	-38	-18	-4	-17	3	5	0	-16	7	22	-10	-34	22	9	-64	-9	-2	8	-6	9	13	26	-3	-28	-7	-1	10	11	16	-40	-39	-52	10	-26	1	5	13	7	4
15	-51	29	25	-26	6	26	19	-53	-39	-34	18	12	20	25	9	9	23	25	-16	22	31	28	-40	18	3	-7	22	-9	-36	13	22	33	1	8	30	23	7	21	23	20	-36	23	29	19	31	20	26	23	20
-1	5	-5	-12	-18	-13	0	58	55	7	-2	-12	-18	-15	22	-9	-16	49	-17	43	54	-10	54	-16	-8	58	-15	52	48	49	0	55	59	52	58	-13	-16	65	48	51	1	1	-2	55	67	61	47	56	62	61
-44	-31	-18	-61	14	-45	-42	-36	-45	-39	-8	12	-64	20	12	-60	-47	-3	-58	-47	2	-3	20	-41	18	14	13	14	-55	-45	-43	17	8	-28	11	-43	0	-19	-45	18	-47	-40	-44	12	13	-39	21	21	26	-45
-15	-22	-9	24	-20	17	3	2	17	-19	-21	7	-33	36	-40	30	33	32	31	28	37	21	30	38	32	42	34	12	33	-17	28	36	11	2	5	30	0	-4	37	25	33	-14	-19	-14	29	21	34	42	30	20
-9	-3	-12	-8	-7	-10	22	-9	-11	-10	-11	-10	-9	-11	-11	-10	-12	-13	-9	-9	38	-6	-7	-11	-12	35	-10	-12	-12	-12	-11	-11	-7	-9	-11	-13	-12	-9	-11	-11	-2	-12	-9	-9	-10	-11	-11	-5	-12	-12
-41	0	-40	-29	-38	-52	-57	-48	-48	-54	-50	-54	-13	-45	-45	-41	-40	-77	-40	-38	-2	-41	3	-57	-11	5	-8	-53	-40	-36	-30	-54	-43	-49	-27	-47	-46	-4	-52	-56	-44	-49	-55	-43	-17	-36	5	2	-9	-45
23	38	-1	31	5	2	0	35	41	-18	43	-11	41	36	-7	13	-7	-3	20	33	37	3	24	46	33	38	41	1	17	35	-11	29	16	-5	31	-31	29	19	20	52	33	-8	-16	-4	47	9	39	52	29	-5
-5	-18	-1	10	4	-7	-4	-12	-3	3	-4	13	-15	-20	18	-1	8	-16	6	-21	36	-17	-1	-10	-5	43	-13	-2	-10	-2	-16	-6	-4	-4	-10	-22	-14	-1	-4	-2	-1	-3	-6	7	-4	13	3	-4	24	-16
-39	0	12	13	-39	21	-36	-21	-6	-46	-46	19	-40	14	11	18	21	-5	15	-44	11	-12	28	-61	16	15	17	-33	-59	-42	-52	-39	-55	15	18	12	13	11	-36	-40	-25	-36	20	20	16	20	10	19	14	-38
-12	0	-15	-21	-7	-5	5	-16	5	-29	-20	-20	-17	-17	-16	21	-20	-19	-18	-18	-16	-10	-18	-17	-17	42	-26	-19	-18	-31	-33	21	-18	-12	-17	-33	-20	-16	-16	20	-9	-18	-19	-17	5	-7	-15	32	-3	-16
-8	-5	-6	-10	-11	15	4	-16	-3	-8	-24	-10	-7	-10	9	-4	-9	-6	-5	-8	37	-3	-10	0	-9	48	-1	-7	-5	-6	-12	-5	-5	10	-5	-29	-17	-6	-25	-9	-24	-6	-10	-2	6	-23	-8	-8	17	-6
-52	-78	-78	-71	-73	3	-58	-23	-34	-76	1	-78	7	-55	0	4	3	-14	4	5	-1	-58	0	-49	-3	-4	2	-48	-46	-56	3	2	-13	-33	-2	-78	9	-54	9	11	-7	-59	-55	-2	-2	-2	6	-2	7	-28
-20	19	-29	12	16	-33	-32	-31	2	-32	-26	-13	-25	32	-14	-33	-21	-27	-27	-29	7	23	-28	-29	25	24	-32	-33	-36	-15	-31	16	-30	-29	-4	-49	-47	17	-22	13	-33	-32	-22	-9	22	-13	-36	28	-13	-30
-3	-5	-16	37	-23	28	-16	25	-21	-21	40	22	-5	41	49	39	35	35	-22	-23	47	52	20	-22	27	52	17	41	-24	34	7	26	-5	15	31	-6	36	38	45	50	-24	-7	-9	44	48	50	-19	52	39	37
-16.2778	-13.4444	-15.5	-6.88889	-17.0556	-5.16667	-16.3333	-5.88889	-10.7222	-26.8889	-14.4444	-8.05556	-13.1667	1.77778	-4.22222	-3.94444	-4.22222	-2.61111	-7.66667	-10.7222	16.7222	-1.61111	7.27778	-18	6.66667	23.8889	-0.0555556	-6.16667	-10.9444	-14.3889	-9.38889	7.83333	-1.11111	-8.27778	0.166667	-20.8333	-7.33333	-1.22222	0.111111	10.1667	-11.2222	-23.7778	-17.3333	2.38889	12.9444	6.27778	5.55556	18.7222	12.8333	-5.05556
adventurous	affectionate	ambitious	arrogant	big-headed	bossy	brave	chatty	cheerful	childish	clumsy	confident	creative	cruel	defensive	determined	honest	dishonest	easy-going	enthusiastic	frank	friendly	funny	fussy	generous	grumpy	hard-working	helpful	imaginative	impolite	inconsiderate	indecisive	inflexible	insecure	intelligent	jealous	kind	lazy	loyal	mean	meticulous	modest	moody	narrow-minded	nasty	optimistic	outgoing	patient	pessimistic	pretentious
-5	14.75	8.25	5	-11.5	11	19.25	20.75	5.5	-49.5	7.25	19	23.75	17.5	10.75	18.75	20	16.25	19	22	17	18.75	25.75	0.25	16.25	17.25	17	16.25	22	18.25	-58	16	18.75	8.25	12.5	9.5	19.25	10.25	18	18.25	19.25	11.5	17.5	16.75	23	16.5	4	18.25	15.5	15
-3	-62	12.75	15.5	-6	2	17.5	16.75	10.75	-40.25	4.25	11.25	14.5	17	4	14.25	15.5	8.75	14.5	13.5	19	16.25	16	7.25	12.5	10.5	11.5	15	10.5	12.5	-62	6.5	14.5	1.25	-1.25	-3	11.75	11	15.75	14.75	12.75	2	16.75	18.25	13	10.75	0.75	13.5	13.75	9.25
-0.75	-36	-6.5	-4.5	-14.25	-5.75	-0.75	-10.75	-14.75	-18.5	-4.5	-1.25	-36	-2	-10	-3	-9.5	-2	-4.75	-11.5	13.5	-12	-9.75	-9.75	-5.5	8	-7.5	-8	-10.25	-36	-36	-2.5	1.5	-14.5	-7	-11.25	-8	-13.5	3.5	3	-7.5	-8.25	-10.25	-0.5	4	-14.5	-9.75	-1.75	-2.5	2.25
-5.75	-64	1.25	8.75	-1.25	11.75	13.75	12.5	10.25	-54.25	10.5	8	-64	12.25	-10.75	7.25	10.5	7.25	9.75	11.25	6	6.25	12.25	-6.25	8	10.5	9.25	-64	8.25	15	-64	20.5	14.75	3.75	-16.25	-23	7.75	8.75	7.25	12.25	8.25	8	-0.25	8.25	15.75	11.75	-18.75	12	14.75	8.75
10	-59	19.75	16.5	1.25	-3.25	22.75	22.25	19.25	-34.75	17.5	18.5	19.75	23.25	14	19.25	18.5	18.75	17.5	17.25	15.75	17.5	24.25	-18.25	17.5	17.75	16.75	16.25	16.5	19.25	-59	17.75	22	8.75	5.5	8	22.5	17.5	21	19.25	18.75	14	18.75	17	18.5	19.75	18	11.5	19.75	19
28.75	-22	31.5	26.75	17.25	19.25	25.75	28.25	22.5	-12.25	14.25	31.25	26	30.5	26.25	31	29.25	28.75	28.5	27.5	29.5	21	21.75	8.75	29.75	32.5	24	25.5	27	28.75	-22	31.25	30.5	10.5	30.75	12.25	18.5	24.25	32.5	31.25	32.25	10.75	22.75	30	35.25	27	16.5	30.75	31.5	19.75
-21.5	-64	-11.25	2.75	-10.25	-12.5	7.75	7.25	9	-35.75	8.25	-13.25	9.25	14.5	7.75	9.5	7.75	14.5	5	9.75	13	11.25	8.25	-24.5	11.25	10.75	7.25	7.5	7.25	16.75	-64	9	12	-10.75	14.5	-14	11.75	3.75	12.75	13	10	-0.5	8.25	8	14.75	4.75	-1.25	7.5	1.75	5.25
4.75	-40	26.75	4	16.25	17.25	29.25	30	26.5	-10	24	16.25	20.5	34.25	16.25	29.5	23.75	27.5	25.75	34.5	29.25	27.5	27.5	-0.75	20.75	17.75	25.75	30.5	21.75	31.5	-40	21.5	31.5	6	30	-5.75	29.75	21.75	31	29.25	31.25	18	14.5	27	30.5	24.75	24.75	32	27.25	14.75
5.25	-31	25.25	7.25	17.75	9	26.5	32.5	26	-8	18.75	26.75	21	28	18.5	27.75	25.5	28.75	24.25	22	29	29.25	25	7.5	19.5	27.5	17.25	-31	25.25	28.75	-31	18.5	30.25	-2.25	29.75	7.75	21.5	18.25	27.75	33.25	23.5	13.5	23.75	24	32.75	22.25	11.25	31.5	28	26.25
-15.5	-77	0.25	-2	-7.5	-16	5.25	6.25	-6.75	-55.5	7.75	-2.25	-77	4	0.75	2.5	0.75	1.75	2	-2.5	-14.5	0.25	4.25	-34.25	2	1.5	4.25	7	-77	1.25	-77	-10.5	0.75	-11.75	3.25	-16.25	1.75	-1.5	2.75	1	2.25	-6.75	-2.5	2.75	-0.5	7.75	-77	1.25	1.75	-2.5
6.75	-38	-6	15.25	-1	-10.25	13.75	4.5	6.25	-14	9.5	10.75	5.75	17.25	3.75	14	5	14.5	11.5	5.25	18.5	7.5	6.75	-2.5	18	5.5	10	7.25	10.25	13.25	-38	12.25	18.25	3	2.5	-6.25	7.5	1.75	18.75	22	13	5.25	5.25	10.75	19.25	4.75	8.5	13	9.75	21.25
11.75	-26	30.5	37	6	18.75	27.25	28.5	18.75	-4.25	7	27.75	19.75	37	7.75	35.5	30.75	37.25	33.25	20.25	28.5	30.75	30.75	34.75	24	34.5	9	33.25	22.5	35.75	-26	23.5	30.75	6.25	28.5	5.75	28	28.25	36	30.75	25.25	25.5	25.25	30.25	45.5	21.25	20	39	30	29.5
-9.5	-61	-1.75	-5.75	-3.5	-2	8.25	13.25	8.75	-32	11.5	0	1.25	12.25	7.75	10.25	8.5	-5.75	9.5	12.25	9.5	7	8	-11.25	9.25	13.75	8.25	11.5	9.25	6.75	-61	-3.75	7.75	-16.5	7.25	-10.75	8	7.75	9.25	11.5	10.5	5.25	-3.5	7.75	10	6.75	-26.5	11	7.75	11.25
2.25	20	14.25	21.75	3	3.5	22.25	21.5	18.25	-7.75	28	12.25	13.5	24.25	19.75	19.5	26.75	23.75	21.5	25.25	11.75	23.75	25.5	-4.25	21.25	28.25	14.5	21.5	17.25	24.25	-38	13.75	23	6.5	16.5	-1	16.25	13	20	23.75	19.5	15.25	16.75	20.5	22.5	19.5	17.25	25.75	28.75	10.5
6.5	13.5	23	9.5	2.25	8.75	17.75	12.5	24.5	-9.75	19.25	28.5	14.5	18	6	18.25	17.5	21.5	17.25	28	27.5	15	24.75	9	7.5	20	11	11.25	6	18.25	-29	8	21.5	3	25	-4.25	21.5	2.75	22.75	28.5	17	13	11.5	19	29.75	27.75	19.75	29.75	20.75	18.75
-0.75	-78	-10.5	1.25	-14.25	-25.25	3	10.5	4.25	-30.75	7.25	-10	0.5	4.25	-12.25	3.75	-4.25	2.25	4.25	0.75	-13.75	6.75	6.75	-2	6.5	-2	1.5	2.75	-3.25	5.75	-78	-1.5	7	-24.5	-2.75	-24.25	5.25	0.5	2.5	3	-2.75	-10	-10.75	0.75	5.5	7	-14	2.75	1.5	-10
-3.75	-53	14.25	9	4.25	-2.75	17	19.75	9.25	-26	17	4.75	10.75	19.5	13.5	16.25	15.5	8.5	17	17	15	12	21.25	11.75	15.75	6	12.25	12.25	12.25	12.5	-53	12	18	-6.25	10	8	15.25	10.25	18.75	17.5	12.5	7	4.75	16	19	11	-0.25	16.5	10.5	-0.25
7.75	-28	17.75	17.5	9	6.75	17	19.25	15.75	-8.25	12.25	17.5	17	14.25	9	19.5	25	20.75	20.75	17.5	10.25	18.25	16.75	14.25	18.25	15.5	6.25	15.75	15	16.75	-28	13	19	5	19.75	7.25	18.5	3	20.75	24.75	17.25	-1.5	7.5	19	19.75	20	-6.25	19.75	23.5	13.75
1.01389	-38.375	10.5278	10.3056	0.416667	1.68056	16.2917	16.4167	11.8889	-25.0833	12.2083	11.4306	2.26389	18.1111	7.375	16.3194	14.8194	15.1667	15.3611	15	14.7083	14.2778	16.4306	-1.125	14.0278	15.3056	11.0139	7.25	7.80556	14.9583	-48	11.4028	17.875	-1.34722	11.5833	-3.40278	14.2639	9.31944	17.8333	18.7222	14.6111	6.77778	9.22222	15.3056	19.9028	13.8194	-0.722222	17.4444	15.7778	11.8056
[truncated: 18 more columns]
