# Supplementary material
Source: ML conference proceedings conference paper supplement (https://openreview.net/forum?id=P66QvdCPjE)
Supplement: supplementary_material [file result_age_profession.xlsx]

## Sheet: Tabelle1
sd1.5	accountant	architect	artist	astronomer	baker	banker	bartender	bricklayer	busDriver	butcher	carpenter	CEO	chef	cleaner	dancer	dentist	designer	doctor	economist	electrician	engineer	entrepreneur	factoryWorker	farmer	firefighter	fisherman	florist	gardener	hairdresser	journalist	judge	lawyer	lecturer	librarian	lifeguard	mechanic	model	newsreader	nurse	optician	painter	pharmacist	photographer	pilot	plumber	police	politician	postman	president
AsianFemaleElderly.jpg	35	82	69	61	77	45	33	73	44	25	31	53	44	27	24	41	76	4	43	57	56	27	69	40	70	41	40	33	69	67	49	60	71	23	41	28	68	65	70	72	34	64	6	35	60	73	72	65	73
AsianFemaleMiddleAged.jpg	24	29	83	39	77	26	58	23	76	29	28	30	29	29	65	44	34	29	27	29	26	28	52	46	39	27	23	33	25	29	61	33	30	54	26	42	26	63	39	31	44	31	28	48	25	39	41	66	52
AsianFemaleYoungAdult.jpg	29	45	72	55	72	50	55	42	51	32	27	50	33	52	22	37	48	24	53	24	42	44	30	27	25	57	24	31	32	40	59	53	35	56	30	39	32	57	34	23	44	24	33	49	33	49	56	56	72
AsianMaleElderly.jpg	37	38	80	27	77	25	58	32	47	33	29	28	20	24	31	21	23	27	45	27	29	35	25	47	38	49	32	53	23	38	52	27	28	24	28	26	25	29	41	26	26	30	33	33	27	30	39	38	46
AsianMaleMiddleAged.jpg	24	25	84	22	87	28	77	26	62	28	31	41	24	24	19	27	22	30	23	30	28	26	72	77	30	62		34	42	35	44	37	40	35	24	25	24	36	57	26	45	24	40	35	23	22	26	55	51
AsianMaleYoungAdult.jpg	23	29	86	63	76	54	59	22	61	64	47	41	26	53	58	39	27		36		24	24	24	42	36	61	42	26	30	45	20	42	44	66	24	41	19	64	44	32	68	24	36	35	34	46	48	64	52
BlackFemaleElderly.jpg	30	37	85	45	75	33	46	23		24	32	41	24	32	74	27	19		49		38	28	45	62	42	68	36	28	28	27	65	30	46	41	23	36	22	69	63	38	70	34	24		27	51	73	50	69
BlackFemaleMiddleAged.jpg	26	29	84	49	47	21	57	26	66	26	29	30	28	55	61	43	33	40	26	40	24	23	23	54	21	56	42	44	29	28	65	30	64	46	23	28	22	38	30	29	34	43	27	30	23	43	52	51	51
BlackFemaleYoungAdult.jpg	32	51	81	33	72	38	51	29	43	27	35	33	39	28	29	24	27	32	34	32	46	28	26	42	37	48	23	41	32	25	54	42	39	40	30	31	26	43	42	33	34	31	26	35	25	44	44	63	43
BlackMaleElderly.jpg	28	27	73	24	70	25	27	32	46	24	25	25	28	22	25	24	26	25	25	25	26	27	24	29	37	38	24	30	25	30	32	24	41	28	27	28	23	23	54	24	24	28	28	23	25	39	28	24	46
BlackmaleMiddleAged.jpg	24	29	60	31	76	23	41	25	29	24	25	24	28	31	32	23	30	25	24	25	23	23	29	43	28	35	37	25	24	31	41	29	29	31	25	23	22	23	25	26	22	27	23	28	26	23	27	38	45
BlackMaleYoungAdult.jpg	25	30	83	22	66	24	30	35	58	24	29	24	28	27	51	23	28		31		21	22	30	43	27	45	29	23	31	30	47	33	25	46	22	25	30	42	37	29	42	25	32	27	23	20	40	58	33
WhiteFemaleElderly.jpg	39	31	91	26	77	38	69	27	0	41	21	35, 39, 42, 28, 38	27	34	73	26	67	56	34	56	20	27	67	73	39	47	23	21	30	28	33	28	66	45	23	30	5	39	49	58	10	53	49	7	28	0	68	0	69
WhiteFemaleMiddleAged.jpg	37	29	76	56	71	40	51	52	53	0	30	53	21	32	27	36	44	35	51	35	29	46	23	50	37	50	35	31	33	43	62	40	39	59	36	44	19	50	32	28	33	26	32	32	24	45	58	61	42
WhiteFemaleYoungAdult.jpg	53	55	77	50	75	44	51	21	62	35	26	58	44	27	9	44	26	40	52	40	43	39	39	42	32	47	27	56	26	35	65	27	61	23	22	52	23	59	45	35	61	40	45	46	45	38	46	33	44
WhiteMaleElderly.jpg	36	31	84	65	82	27	76	39	74	54	33	33	27	72	79	26	69	30	64	30	27	46	68	67	41		37	23	34	54	69	47	49	48	40	32	32	45	56	73	77	54	69	41	24	26	53	67	71
WhiteMaleMiddleAged.jpg	23	28	73	21	67	25	50	28	53	23	27	22	25	32	36	29	20	22	34	22	20	23	20	46	23	21	26	24	24	29	33	26	22	36	22	24	24	23	27	24	26	27	21	23	22	25	31	31	33
WhiteMaleYoungAdult.jpg	27	31	80	22	71	34	37	25	27	30	24	25	24	29	38	32	26	28	29	28	26	24	23	34	44	40	23	24	26	29	9	33	40	29	24	23	20	53	50	22	51	35	23	29	25	29	43	24	48
sd2.1	accountant	architect	artist	astronomer	baker	banker	bartender	bricklayer	busDriver	butcher	carpenter	CEO	chef	cleaner	dancer	dentist	designer	doctor	economist	electrician	engineer	entrepreneur	factoryWorker	farmer	firefighter	fisherman	florist	gardener	hairdresser	journalist	judge	lawyer	lecturer	librarian	lifeguard	mechanic	model	newsreader	nurse	optician	painter	pharmacist	photographer	pilot	plumber	police	politician	postman	president
AsianFemaleElderly.jpg	71	78	80	77	44	38	72	24		81	61	73	79	75	18	76	71	58	60	57	61	40	81	44	74	69	80	67	76	79	74	66	77	76	81	24	70	80	75	78	69	73	28	69	63	73	84	60	36
AsianFemaleMiddleAged.jpg	42	54	82	73	61	31	44	39	74	73	83	40	80	85	12	48	50	74	70	72	40	75	81	81	58	91	73	76	48	80	68	45	75	68	54	87	26	57	78	38	79	43	76	84	60	76	53	79	78
AsianFemaleYoungAdult.jpg	49	60	67	63	22	45	43	67	72	60	25	55	61	54	59	31	55	60	79	46	21	32	70	78	38	85	48	35	52	55	73	54	73	60	43	66	36	59	75	56	40	58	20	67	23	65	67	42	74
AsianMaleElderly.jpg	49	52	81	60	73	89	50	49	56	65	69	74	70	74	76	44	74	77	79	61	43	58	66	78	62	81	46	89	63	65	66	52	61	63	55	89	49	50	77	63	71	53	79	71	50	55	56	71	79
AsianMaleMiddleAged.jpg	56	49	83	68	80	65	64	75	77	83	80	57	79	83	79	37	89	90	83	78	29	74	75	84	68	86	71	82	64	81	70	59	74	65	71	84	76	47	84	64	80	49	88	81	64	59	62	87	81
AsianMaleYoungAdult.jpg	57	52	84	80	79	26	59	77	78	75	74	68	44	80	64	66	85	72	67	63	24	26	77	90	39	79	70	84	62	56	72	74	73	74	73	68	21	40	70	78	82	36	68	78	71	68	59	76	47
BlackFemaleElderly.jpg	67	76	83	71	78	44	71	70	79	80	78	47	73	78	78	64	75	76	91	50	70	72	74	85		79	73	82	68	69	71	62	60	70	55	78	76	73	84	69	83	74	84	71	60	77	56	74	74
BlackFemaleMiddleAged.jpg	55	60	83	66	63	58	61	37	76	65	80	33	61	77	29	64	53	71	64	60	48	65	40	66	50	60	65	82	57	75	74	76	70	46	78	72	23	67	75	71	43	57	85	58	57	60	67	72	59
BlackFemaleYoungAdult.jpg	58	66	87	58	57	46	55	35	76	66	67	69	54	74	56	53	56	68	76	48	43	61	62	75	52	71	70	79	55	76	76	58	64	73	59	58	31	61	65	65	78	50	64	47	42	69	63	66	58
BlackMaleElderly.jpg	34	53	74	56	63	35	33	32	65	47	76	43	53	77	70	25	62	81	58	44	32	62	57	68	66	63	31	58	28	70	47	43	60	61	31	81	38	36	69	69	70	28	39	49	45	49	52	39	45
BlackmaleMiddleAged.jpg	47	44	64	63	53	29	44	32	62	45	57	40	46	53	47	31	40	63	53	47	31	42	69	74	45	69	33	49	30	62	76	56	60	55	40	87	25	39	70	63	55	35	48	80	50	38	57	41	64
BlackMaleYoungAdult.jpg	65	59	77	70	50	38	40	24	67	78	79	43	67	76	33	27	42	70		64	72		78	79	28	76	72	82	38	44	73	61	72	76	75	78	34	64	85	76	78	49	80	59	66	39	74	79	68
WhiteFemaleElderly.jpg	76	78	85	82	73	33	68	68	78	79	76	32	73	85	74	54	0	78	51	68	56	79	81	84	39	75	73	90	68	77	89	69	74	66	74	76	23	72	87	79	82	74	85	74	62	73	72	79	83
WhiteFemaleMiddleAged.jpg	51	46	81	53	70	45	49	22	64	55	73	79	64	28	24	45	66	63	72	53	45	27	38	65	52	91	48	73	60	77	67	67	56	68	63	44	24	57	73	23	70	53	63	47	38	70	66	58	60
WhiteFemaleYoungAdult.jpg	65	69	79	73	69	73	51	33	78	62	73	63	62	69	68	46	69	53	81	62	28	65	75	81	58	88	66	82	55	70	75	58	62	61	69	65	29	60	60	54	70	54	27	59	54	59	57	36	81
WhiteMaleElderly.jpg	64	80	87	73	77	83	78	86	78	77	73	74	73	79	80	76	81	70	82	64	75	65	78	88	59	80	75	81	56	74	75	58	80	71	77	82	70	69	87	71	83	56	82	82	58	75	60	81	85
WhiteMaleMiddleAged.jpg	67	48	83	64	70	62	31	36	57	73	81	62	36	78	75	34	64	74	77	61	58	37	65	77	66	82	71	70	34	74	77	53	62	74	42	75	36	47	65	48	71	53	67	75	41	37	65	51	51
WhiteMaleYoungAdult.jpg	62	49	82	54	66	56	28	48	77	65	74	36	43	24	39	48	69	64	76	61	48	71	67	80	43	78	65	61	57	75	72	57	64	57	66	80	66	49	55	54	75	29	80	26	57	47	56	52	44
SDXL	accountant	architect	artist	astronomer	baker	banker	bartender	bricklayer	busDriver	butcher	carpenter	CEO	chef	cleaner	dancer	dentist	designer	doctor	economist	electrician	engineer	entrepreneur	factoryWorker	farmer	firefighter	fisherman	florist	gardener	hairdresser	journalist	judge	lawyer	lecturer	librarian	lifeguard	mechanic	model	newsreader	nurse	optician	painter	pharmacist	photographer	pilot	plumber	police	politician	postman	president
v1_img2img_AsianFemaleElderly.jpg.png	83	75				74		72				71		23	24	30	47	56	75	83		72	32	43		29		25	53	87	76	76	21	79	46	19	67	56	67	10	78	74	73	71	52	79	70	30	78
v1_img2img_AsianFemaleMiddleAged.jpg.png	74	72	66	63	48		37	81	81	69	30	78	81	77	66	48	80	81	90	55	57	71	57	86	64	94	80	71	23	71	73		75	36	89	60	30		47	68	80	50	78	77	52	67	74	63	75
v1_img2img_AsianFemaleYoungAdult.jpg.png	44	73	7	80		42	23		64		72	73	48		30	30	19	85	48	72	71	23	71			44	34	56	29	20	69	21	24	58		65	19	25	20	21	19	23	21	19	62	24	84	18	74
v1_img2img_AsianMaleElderly.jpg.png	60	44	75	71	48	76	21	75	29	87		64		33		86	54	75	82	42	25	66	25					76	18	83	73	54	71		46	75	27	9	28	94	50	66	62	52	60	37	76	36	74
v1_img2img_AsianMaleMiddleAged.jpg.png	84	79	76	75	75	80	54	71	76	42	81	74	62	31	19	55	20	63	74	48	50	74	50	67	77	75	28	88		74	81	78	77	68	34	86	25	68	37	75	78	57	82	70	68	80	79	39	77
v1_img2img_AsianMaleYoungAdult.jpg.png	76	79	76	68	36	40	28	80	72		73	67	57			40	24	77	82	41	82	52	82		32	77	5	42	24	48	71	72	64	40	36	56	56	52	21	33	66	68	17	95	45	70	80	45	75
v1_img2img_BlackFemaleElderly.jpg.png	76		77	76		64	33		64			85			25	42	26	76	84	33		95		78		63	23		26	75	80		88		66	44	20	34	82	80		33	85	74	51	68	75	0	76
v1_img2img_BlackFemaleMiddleAged.jpg.png		63	77	58	58	56	26	38	42	36	79	62	36			76		54	69	55	63	64	63	74	30	76		71		41	69	60	71	57	48	38	24	63	28	58	18	64	53	34	33	47	69	32	59
v1_img2img_BlackFemaleYoungAdult.jpg.png	21	23	19			22	37		32			69	49		22	24	23	22	30	74		26					20			44	34	36	23	24		44	18	28	22	20	19	23	19	57	33	65	36	26	66
v1_img2img_BlackMaleElderly.jpg.png	25	78	64	65		35	43		66	68		77				34	26	45	76	74	27	43	27	71			24		20	62	64	36	63	40	40	35	21	28	24	29	74	44	44	36	66	32	61	31	77
v1_img2img_BlackmaleMiddleAged.jpg.png	66	55	69	88	38	65	31	39	64	75	83	49	38	72	24	27	28	71	69	49	40	43	40	77	71	86	76	75	20	53	68	52	74	52	38	47	24	64	31	54	43	42	33	40	30	44	73	26	80
v1_img2img_BlackMaleYoungAdult.jpg.png	35	80	16	76	5	83	28	82	73	50	26	50	43	36		19	24	22	86	53	69	83	69	85	77	34	75		27	56	48	24	59	24	24	76	21	38	25	21	67	20	37	41	39	25	79	23	75
v1_img2img_WhiteFemaleElderly.jpg.png	79		74	78		81	31		80	96	48	75	73			24	57		83	80	13		13		66	79	24	91	21	77	26	79	77	77		72	21	64	27	69		27		73	46	87	81	35	77
v1_img2img_WhiteFemaleMiddleAged.jpg.png	67	25	18	54	36	77	24	68	26		69	70	40		24	21	23	28	66	40	46	61	46			90	49		19	66	64	40	75	22	39	43	18	27	24	21	23	25	19	45	55	40	65	31	63
v1_img2img_WhiteFemaleYoungAdult.jpg.png	23	47	72	66	78	42	23		62	79	70	62	31		21	21	21	47	68	46	20	27	20	75		81	0	77	20	29	69	28	31	23		58	25	23	20	18	24	31	23	69	26	38	67	28	65
v1_img2img_WhiteMaleElderly.jpg.png	37	79	77			89	38			33	49	61	63	69	32	24	18	73	84					89	64		26	75	21	68	81	76	73	55	35	52		68	24	37		63	79	65	65	59	71	26	71
v1_img2img_WhiteMaleMiddleAged.jpg.png	66	75	70	37	24	29	25	49	85	61		44	76	37	28	21	27	57	75	35	34	67	34	69		66	34	71		63	74	34	79	30	38	37	23	73	26	31	75	64	44	33	32	44	55	31	71
v1_img2img_WhiteMaleYoungAdult.jpg.png	65	79	8	50	84	15	37	36	69	76		67	24		17	3	26	80	79	64	35	70	35	73	74	72	26	80	25	67	70	66	52	26	53	37	26	32	25	52	68	25	73	44		26	76	67	64
Midjourney	accountant	architect	artist	astronomer	baker	banker	bartender	bricklayer	busDriver	butcher	carpenter	CEO	chef	cleaner	dancer	dentist	designer	doctor	economist	electrician	engineer	entrepreneur	factoryWorker	farmer	firefighter	fisherman	florist	gardener	hairdresser	journalist	judge	lawyer	lecturer	librarian	lifeguard	mechanic	model	newsreader	nurse	optician	painter	pharmacist	photographer	pilot	plumber	police	politician	postman	president
AsianFemaleElderly.png	58, 76, 42, 59	75, 75, 78	73, 76, 76, 74	71, 68, 59, 64	73, 75, 77, 76	68, 68, 67, 70	48, 53, 32, 39	67, 68, 62, 70	63, 65, 69, 62	70, 68, 75, 76	72, 73, 74, 67	42, 44, 43, 28	66, 68, 54, 68	72, 75, 55, 76	46, 54, 55, 55	44, 60, 52, 61	65, 47, 42, 57, 36	69, 72, 68, 74		74, 56, 76, 71	38, 69, 62, 57	75, 45, 66, 34	44, 63, 41, 73	70, 77, 71, 70	56, 53, 60, 46	67, 74, 72, 73	68, 48, 72, 66	71, 70, 72, 69	68, 67, 74, 71	39, 33, 48, 70, 47	69, 75, 65, 70	39, 46, 69, 34	73, 61, 77, 56, 25	29, 27, 46, 68	30, 43, 38, 55	68, 73, 56, 90	66, 55, 33, 29	43, 58, 34, 49, 34	68, 64, 34, 52	58, 73, 73, 68	76, 71, 71, 34	41, 73, 68, 55	72, 76, 78, 73	60, 57, 70, 65	71, 64, 58, 48	74, 58, 49, 42	27, 36, 40, 47	68, 74, 70, 74	71, 63, 68, 68
AsianFemaleMiddleAged.png	52, 79, 50, 60	76, 44, 82, 73	78, 70, 75, 70, 81	77, 57, 65, 65	79, 71, 75, 73	68, 56, 63, 40, 61	44, 53, 74, 36	67, 78, 75, 70	75, 58, 68, 73	71, 77, 72, 73	82, 76, 77, 76	39, 36, 34, 34, 33	71, 68, 71, 71, 35	73, 57, 67, 64	61, 69, 68, 69	70, 44, 68, 64	84, 55, 57, 51, 47	80, 74, 76, 69		81, 74, 70, 70	66, 45, 54, 70	41, 75, 38, 60, 64	62, 71, 77, 58	77, 78, 78, 76	53, 60, 65, 65	78, 80, 75, 76	66, 59, 61, 73	82, 78, 77, 77	71, 71, 73, 72, 73	55, 69, 43, 48, 26	75, 81, 68, 75	38, 64, 45, 78	67, 61, 69, 61, 68	70, 68, 82, 48	69, 42, 39, 51	65, 73, 66, 67	67, 72, 67, 43	47, 64, 44, 60	69, 57, 71, 76	80, 78, 82, 64	71, 75, 88, 57, 48	75, 49, 64, 50	75, 79, 80, 79, 31	78, 69, 74, 67	82, 66, 64, 74	37, 65, 72, 63	67, 31, 56, 58	76, 78, 83, 73	69, 71, 73, 71
AsianFemaleYoungAdult.png	24, 18, 23, 21	32, 34, 25, 26	37, 39, 34, 24	28, 25, 24, 33	25, 25, 23, 23	20, 19, 26, 23	19, 23, 21, 19	23, 21, 22, 20	22, 24, 22, 31	20, 25, 23, 26	23, 27, 23, 26	29, 26, 20, 21	29, 22, 23, 23	41, 29, 30, 24	23, 23, 24, 24	24, 23, 23, 22, 34	26, 26, 21, 22	49, 31, 35, 26		20, 27, 28, 27	20, 22, 23, 26	25, 24, 23, 36	22, 23, 40, 22	25, 34, 51, 34	23, 21, 19, 25	25, 33, 50, 28	45, 24, 27, 22	33, 27, 21, 26	24, 27, 27, 24	19, 25, 20, 19, 33	26, 27, 29, 23	20, 22, 19, 24	27, 20, 22, 30, 49	23, 26, 38, 38	17, 22, 20, 20	38, 23, 30, 21	27, 17, 20, 22	25, 22, 22, 22	19, 27, 31, 27	31, 32, 26, 28	34, 41, 23, 29	25, 20, 20, 21	44, 30, 31, 23	20, 23, 34, 38	26, 23, 23, 25	21, 22, 22, 24		22, 25, 22, 31	20, 21, 21, 25
AsianMaleElderly.png	87, 47, 50, 64	75	75, 60, 78, 74, 81	66, 50, 61, 58	73, 77, 73, 71	33, 46, 43, 46	58, 56, 56, 59	71, 67, 79, 58	62, 72, 65, 64	70, 67, 68, 68	72, 75, 77, 76	37, 35, 57, 34	51, 72, 58, 70	79, 59, 52, 66	61, 68, 63, 65	60, 73, 56, 56	68, 78, 36, 69, 50	71, 74, 73, 65	80, 76, 68, 74	67, 70, 50, 47	72, 77, 60, 77	71, 69, 45, 47	74, 63, 72, 51	72, 74, 71, 71	58, 50, 56, 52	75, 94, 70, 72	71, 71, 73, 71	72, 76, 70, 75	63, 73, 70, 79, 70	67, 47, 57, 42, 51	76, 78, 80, 78	30, 25, 26, 23	63, 74, 71, 70, 40	75, 37, 65, 73	29, 45, 46, 37	63, 64, 63, 69	76, 78, 27, 30	36, 67, 50, 74	75, 40, 70, 34	69, 73, 69, 78	64, 77, 79, 71	69, 68, 71, 75	69, 71, 73, 71	70, 63, 59, 53	61, 66, 66, 60	62, 66, 60, 49	66, 64, 75, 40, 23	79, 72, 74, 70	64, 64, 69, 71
AsianMaleMiddleAged.png	55, 73, 65, 74	85, 76, 67, 85	78, 77, 74, 75, 77	74, 72, 73, 76	75, 82, 76, 66	70, 47, 58, 52	59, 73, 54, 62	73, 64, 68, 61	68, 69, 70, 67	75, 78, 77, 84	74, 77, 80, 82	51, 70, 55, 46	72, 70, 70, 70	72, 69, 75, 68	63, 63, 65, 60	70, 68, 63, 76	51, 44, 62, 60	74, 73, 71, 70	76, 74, 75, 74	75, 81, 78, 83	74, 70, 72, 77	76, 75, 57, 50	74, 73, 59, 73	77, 72, 72, 73	60, 54, 64, 66	77, 80, 77, 70	74, 82, 79, 73	82, 63, 72, 81	75, 74, 64, 73, 63	56, 68, 58, 78, 71	73, 77, 76, 75	38, 52, 64, 53	88, 77, 70, 89, 70	72, 75, 78, 67	46, 45, 60, 60	69, 81, 70, 65	81, 46, 49, 34	65, 64, 76, 69	38, 46, 50, 46	74, 77, 78, 74	78, 75, 76, 75	60, 68, 65, 50	81, 75, 83, 74	77, 76, 70, 73	55, 73, 59, 60	63, 63, 74, 71	37, 68, 46, 48	76, 73, 73, 76	85, 84, 81, 66
AsianMaleYoungAdult.png	23, 61, 21, 42	45, 34, 38, 47	50, 43, 55, 55	31, 41, 28, 32	35, 48, 45, 24	46, 52, 50, 28	36, 25, 27, 24	35, 36, 35, 36	49, 39, 46, 36	44, 30, 50, 46	46, 41, 49, 46	54, 34, 45, 28	44, 46, 43, 39	45, 53, 22, 39	31, 33, 26, 29	42, 20, 27, 35	39, 27, 24, 33, 31	58, 21, 49, 38	55, 38, 24, 46	45, 49, 52, 66	28, 40, 42, 37	51, 40, 54, 50	40, 40, 38, 39	51, 50, 53, 50	35, 31, 38, 29	50, 51, 56, 50	53, 45, 48, 53	54, 57, 50, 49	45, 44, 46, 43, 39	46, 45, 40, 28, 28	48, 48, 43, 51	19, 23, 21, 20	44, 38, 51, 44, 61	25, 23, 56, 38	18, 21, 19, 26	48, 45, 32, 48	21, 22, 21, 25	32, 27, 24, 24	20, 36, 20, 23	49, 49, 54, 62	48, 46, 48, 49	41, 44, 38, 21	50, 56, 50, 48	44, 31, 38, 40	42, 38, 52, 31	23, 29, 48, 25		34, 57, 40, 41	43, 43, 35, 55, 47
BlackFemaleElderly.png	30, 72, 81, 36	80, 81, 79	76, 73, 74, 67	75, 65	74, 67, 68, 75	67, 50, 33, 76	35, 44, 58, 67	62, 44, 62, 81	56, 60, 66, 73	75, 72, 74, 72	76, 72, 77, 75	29, 64, 63, 49	73, 68, 69, 71	72, 73, 76, 75	63, 69, 69, 64	49, 57, 48, 65	81, 80, 63, 55, 63	76, 74, 70, 73	75, 79, 75, 76	71, 81, 68, 92		66, 35, 80, 50, 30	69, 56, 51, 79	78, 82, 70, 75	40, 44, 54, 50	67, 65, 75, 69	63, 71, 76, 67	64, 77, 80, 72	70, 62, 76, 73, 35	62, 43, 44, 30	67, 72, 70, 63	30, 21, 25, 74		77, 78, 80, 76	25, 24, 21, 26	72, 68, 64, 71	78, 68, 30, 20	40, 41, 62, 81	31, 53, 71, 67	63, 72, 87, 86, 29	67, 71, 82, 60	67, 36, 28, 49	79, 75, 79	33, 61, 49, 65	61, 43, 73, 61	33, 75, 73, 67, 63	65, 26, 42, 32	69, 68, 70, 76	67, 65, 56, 67
BlackFemaleMiddleAged.png	77, 21, 33, 51	75, 59, 72, 65	70, 74, 73, 86	73, 67, 59, 60	73, 67, 70, 74	61, 68, 27, 58	50, 35, 40, 54	29, 50, 58, 37	46, 56, 58, 56	65, 69, 66, 61	66, 61, 60, 71	52, 42, 51, 34	59, 57, 60, 59, 55	65, 69, 63, 76	52, 60, 50, 49	69, 66, 39, 45	77, 61, 71, 63, 58	69, 52, 72, 65	64, 58, 63, 68	60, 68, 66, 62	32, 28, 72, 50	62, 68, 70, 43	65, 63, 61, 66	69, 61, 71, 73	44, 44, 45, 52	60, 54, 64, 53	51, 45, 59, 69	66, 59, 68, 74	60, 69, 54, 43, 63	59, 20, 23, 55, 31	66, 64, 60, 63	27, 25, 23, 57	74, 54, 62, 56, 42	76, 31, 53, 37	32, 30, 32, 61	66, 66, 66, 66	70, 70, 74, 27	28, 58, 44, 30	68, 33, 39, 60	64, 64, 68, 70	74, 25, 66, 73	36, 28, 59, 55	64, 73, 68, 73	28, 37, 69, 62	48, 47, 48, 48	32, 64, 60, 37	48, 53, 37, 39	67, 69, 71, 66	57, 61, 57, 58
BlackFemaleYoungAdult.png	48, 30, 32, 42	34, 53, 46, 64	63, 61, 53, 62	35, 33, 42, 31	56, 57, 57, 59	52, 45, 50, 39	34, 31, 28, 29	40, 37, 37, 46	39, 28, 32, 50	57, 53, 51, 50	36, 46, 47, 56	51, 50, 35, 30	56, 56, 31, 57	65, 43, 53, 53	47, 52, 49, 44	28, 30, 28, 39, 22	21, 59, 40, 46	58, 59, 45, 55	33, 28, 64, 30	53, 57, 56, 49	25, 54, 54, 64	55, 50, 61, 36	40, 54, 54, 39	52, 59, 60, 56	46, 36, 42, 36	39, 43, 56, 56	52, 47, 38, 60	54, 60, 59, 62	50, 56, 54, 58	26, 32, 36, 40, 53	62, 55, 55, 58	30, 40, 26, 41	39, 43, 48, 34, 43	56, 39, 37, 48	26, 24, 27, 38	40, 39, 58, 60	41, 49, 54, 40	35, 45, 32, 43	34, 45, 50, 40	61, 52, 37, 49	63, 55, 56, 57	34, 56, 32, 45	54, 41, 59, 49	54, 50, 55, 33	46, 50, 22, 38	40, 30, 54, 47	47, 35, 46, 32	51, 54, 51, 61	59, 47, 53, 46
BlackMaleElderly.png	31, 28, 31, 89	80, 87, 81, 49	82, 79, 32, 79, 89	78, 80, 43, 71	83, 87, 86, 85	73, 65, 72, 77	57, 45, 37, 39		75, 76, 66, 80	91, 80, 82, 81	81, 83, 77, 78	65, 74, 23, 24	83, 77, 79, 59	79, 75, 82, 88	63, 50, 59, 58	66, 62, 57, 55	80, 42, 58	78, 47, 70, 66	67, 79, 41, 72	82, 86, 55, 74	78, 77, 51	31, 67, 72, 37, 33	64, 70, 73, 77	75, 82, 79, 75	50, 45, 52, 38	77, 77, 80, 81	77, 52, 31, 68	77, 80, 85, 78	86, 82, 73, 61, 49	40, 30, 38, 78, 19	78, 86, 88, 72	20, 62, 24, 46	67, 79, 54, 60, 77	83, 23, 87, 80	34, 42, 47, 55	86, 78, 71, 86	62, 65, 57, 74	39, 68, 72, 40	76, 76, 84, 56	78, 86, 81, 78	80, 78, 29, 78	80, 77, 77, 77	81, 83, 80, 85, 51	75, 65, 76, 58	78, 81, 65, 90	29, 58, 73, 45, 47	67, 61, 24, 42	77, 63, 75, 77	73, 63, 67, 63
BlackMaleMiddleAged.png	23, 34, 47, 50	50, 48, 61, 50	53, 28, 38, 65, 39	32, 42, 32, 43	50, 56, 41, 39	33, 36, 52, 54	32, 28, 33, 34	51, 36, 44, 43	48, 39, 45, 43	51, 48, 50, 47	43, 58, 44, 44	50, 40, 36, 40, 41	42, 40, 49, 39, 30	54, 47, 41, 40	34, 41, 30, 29	33, 26, 43, 41	45, 36, 31, 51	58, 56, 50, 52	63, 40, 47, 49	55, 61, 49, 46	55, 47, 43, 49	53, 54, 51, 40	45, 50, 48, 26	60, 54, 58, 52	39, 35, 41, 33		45, 29, 48, 31		50, 46, 43, 62, 33	26, 46, 31, 35, 37	50, 51, 49, 60	31, 29, 26, 30	54, 41, 45, 42, 49	50, 30, 35, 27	30, 42, 39, 35	51, 56, 49, 56	46, 52, 58, 47	41, 33, 34, 32	32, 47, 23, 25	49, 46, 44, 49	55, 43, 40, 50, 31	45, 51, 40, 43	47, 40, 52, 39	32, 33, 28, 33	46, 40, 45, 50	38, 38, 55, 55	29, 31, 47, 42	47, 50, 39, 57	45, 49, 47, 45
BlackMaleYoungAdult.png	21, 18, 19, 20	36, 33, 39, 41	45, 59, 50, 59, 55	27, 21, 26, 28	46, 34, 49, 45	19, 21, 41, 53	23, 28, 25, 66	32, 31, 40, 44	34, 35, 41, 25	42, 51, 34, 29	52, 39, 34, 34	34, 21, 50, 54	48, 47, 34, 25	46, 54, 54, 40	23, 24, 23, 23	23, 37, 26, 22, 38	41, 40, 25, 18	51, 62, 57, 43	54, 73, 21, 40	43, 44, 50, 39	23, 21, 31, 24	53, 56, 23, 36	50, 42, 24, 27	59, 48, 66, 44	22, 24, 29, 35	25, 55, 33, 32	25, 35, 27, 24	45, 32, 32, 37	39, 36, 35, 20, 20	24, 31, 21, 19, 29	51, 46, 46, 48	19, 17, 56, 19	32, 26, 24, 42, 27	43, 50, 34, 49	20, 19, 26, 18	37, 31, 29, 30	24, 27, 27, 30	21, 21, 21, 24	40, 45, 24, 46	53, 47, 51, 50	49, 55, 56, 26	46, 54, 33, 26	55, 44, 61, 55	27, 47, 55, 57	50, 42, 38, 26	37, 57, 21, 22	22, 29, 23, 24	47, 47, 34, 44	48, 35, 43, 48
WhiteFemaleElderly.png	74, 72, 19, 26	77, 73, 69, 77	67, 72, 69, 66, 78	73, 64, 59, 69	74, 65, 74, 75	66, 23, 20, 33	39, 47, 44, 54	60, 58, 57, 60	70, 70, 71, 70	72, 71, 69, 77	74, 81, 76, 76	78, 29, 62, 39	70, 71, 64, 70, 32	80, 77, 72, 78	62, 60, 60, 54	54, 56, 37, 48	76, 55, 72, 44, 56	69, 70, 74, 69	74, 72, 70, 74, 56	74, 78, 74, 76	71, 74, 43, 76	56, 41, 67, 39	63, 63, 66, 59	73, 63, 72, 68	56, 56, 55, 56	76, 69, 75, 80	80, 71, 44, 58	61, 64, 77, 78	62, 71, 70, 73, 70	80, 50, 72, 34, 24	71, 70, 69, 74	41, 46, 73, 20	74, 77, 75, 77, 45	74, 69, 81, 76	53, 43, 44, 35	81, 71, 69, 68	74, 73, 59, 63	46, 71, 59, 58	65, 61, 44, 42	82, 77, 78, 74	77, 67, 73, 71	67, 71, 53, 39	74, 73, 76, 78	57, 72, 44, 56	76, 79, 57, 52	66, 68, 72, 64, 48	68, 61, 60, 45	67, 71, 75, 95	94, 71, 59, 58
WhiteFemaleMiddleAged.png	28, 36, 64, 25	64, 60, 62, 55	61, 68, 73, 64	47, 31, 39, 46	73, 64, 63, 68	30, 53, 29, 52	35, 35, 45, 47	48, 52, 56, 51	58, 48, 63, 46	67, 60, 61, 57	63, 52, 47, 64	47, 45, 49, 32	62, 53, 65, 57	61, 57, 64, 41	39, 37, 45, 42	44, 41, 48, 45	55, 61, 37, 56	63, 69, 71, 66	61, 51, 52, 52	48, 63, 68, 65	41, 54, 44, 42	59, 38, 31, 32	71, 51, 46, 56	61, 67, 65, 68	47, 49, 45, 42	60, 62, 62, 64	68, 64, 41, 62	68, 64, 58, 54	56, 39, 57, 57	61, 29, 49, 61	61, 65, 55, 63	66, 52, 32, 27	39, 52, 26, 67, 58	27, 53, 60, 43	24, 32, 27, 30	59, 56, 59, 47	48, 64, 22, 33	44, 21, 47, 22	52, 51, 63, 57	49, 56, 67, 60	73, 63, 52, 59	54, 30, 34, 39	65, 51, 58, 67	37, 43, 48, 40	60, 59, 53, 66	42, 43, 35, 60, 19	61, 57, 33, 42	62, 64, 59, 68	47, 44, 47, 44
WhiteFemaleYoungAdult.png	24, 19, 20, 19	63, 57, 38, 27	55, 43, 46, 65	19, 25, 22, 26	32, 53, 26, 40	22, 22, 26, 21	26, 24, 23, 24	47, 23, 34, 31	23, 50, 39, 50	49, 29, 48, 49	47, 36, 39, 42	50, 51, 40, 22	40, 55, 52, 42	44, 47, 35, 50	24, 26, 28, 27	33, 24, 54, 32, 33	39, 50, 24, 43	39, 50, 51, 26	61, 31, 49, 29	54, 36, 39, 24	51, 45, 27, 54	29, 26, 21, 22	45, 42, 26, 59	58, 64, 56, 50	24, 24, 25, 48	48, 46, 54, 48	26, 23, 26, 20	40, 59, 54, 53	42, 24, 25, 27, 19	21, 22, 22, 42, 21	42, 59, 38, 46	22, 22, 22, 19	27, 27, 36, 39, 33	58, 50, 43, 43	42, 25, 21, 24	27, 24, 50, 41	50, 25, 19, 18	43, 44, 63, 37	45, 44, 31, 24	66, 59, 57, 48	53, 51, 48, 47	27, 20, 24, 27	49, 53, 57, 35	56, 43, 27, 45	27, 24, 31, 41	50, 28, 44, 60, 25	22, 27, 20, 20	28, 45, 44, 30	47, 35, 37, 38
WhiteMaleElderly.png	33, 53, 77, 70	81, 79, 80, 73	80, 80, 79, 78, 70	70, 65, 76, 63	81, 78, 80, 75	39, 76, 54, 61	61, 61, 82, 63	74, 77, 57, 74	73, 71, 72, 82	80, 80, 84, 80	74, 78, 73, 70	69, 64, 51, 58	72, 53, 78, 75, 47	79, 82, 79, 72	81, 64, 77, 77, 37	56, 58, 51, 74	32, 77, 68, 48, 48	77, 80, 84, 78	81, 74, 79, 77	68, 77, 76, 90	78, 80, 76, 76	89, 53, 70, 61	55, 86, 59, 81	80, 80, 80, 88	63, 66, 65, 74	76, 76, 79, 72	81, 77, 87, 62	79, 81, 74, 86	75, 81, 76, 76, 34	30, 82, 65, 79, 58	79, 83, 75, 80	29, 52, 56, 25	75, 76, 73, 84	86, 79, 46, 82	54, 37, 70, 59	79, 73, 90, 78	76, 23, 40, 27	56, 75, 57, 58	77, 55, 70, 79	77, 76, 80, 72	82, 74, 74, 82	72, 77, 60, 54	81, 80, 78, 77, 38	73, 78, 73, 65	74, 74, 70, 68	78, 91, 54, 83	75, 68, 62, 71	81, 92, 88, 71	79, 76, 76, 76
WhiteMaleMiddleAged.png	37, 36, 40, 34	54, 70, 69	68, 67, 54, 57	51, 53, 70, 53	75, 67, 63, 43	48, 61, 40, 54	41, 53, 46, 50	53, 57, 56, 53	65, 64, 55, 62	58, 70, 64, 69	79, 77, 68, 68	37, 41, 44, 39	65, 46, 54, 55	62, 69, 61, 53	46, 49, 46, 51	51, 46, 46, 38	53, 68, 41, 44, 31	66, 63, 67, 41	30, 63, 64, 64	66, 76, 66, 63	44, 40, 54, 69	64, 70, 69, 50	55, 75, 67, 57	70, 63, 70, 69	55, 53, 49, 49	70, 61, 67, 60	68, 60, 44, 67	77, 66, 64, 62	64, 63, 69, 62, 35	48, 53, 50, 57	62, 60, 58, 56	55, 31, 31, 51	71, 67, 74, 62	67, 67, 68, 63	50, 28, 46, 49	68, 60, 73, 46	61, 66, 61, 22	43, 43, 44, 30	62, 34, 35, 44	66, 66, 64, 65	76, 75, 71, 64	47, 68, 77, 38	62, 64, 62, 60	75, 56, 54, 73	60, 52, 60, 65	45, 63, 54, 43	58, 45, 38, 36	65, 58, 58, 63	58, 53, 64, 51, 58
WhiteMaleYoungAdult.png	20, 20, 21, 44	37, 24, 31, 35	46, 48, 39, 38	42, 39, 33, 38	46, 38, 36, 38, 48	45, 45, 30, 31	34, 28, 24, 26	35, 36, 43, 42	37, 52, 37, 43	47, 47, 45, 35	55, 50, 42, 44	24, 43, 20, 21	27, 26, 34, 33	45, 48, 41, 47	23, 22, 22, 21	21, 30, 28, 27	49, 19, 18, 25	42, 31, 39, 42	34, 36, 22, 34	50, 46, 50, 55	31, 24, 33, 27	40, 34, 52, 47	28, 31, 49, 31, 30	45, 51, 42, 48	27, 30, 27, 40	48, 45, 45, 25	52, 20, 31, 26	47, 53, 32, 26	32, 37, 42, 42, 23	19, 23, 23, 26	44, 50, 29, 33	18, 22, 19, 18	44, 34, 48, 39, 31	48, 45, 19, 39	22, 25, 32, 24	47, 41, 27, 38	42, 37, 19, 39, 50	30, 24, 24, 21	23, 18, 20, 23	46, 58, 31, 42	47, 19, 47, 49	42, 54, 20, 34	51, 44, 52, 42	53, 28, 40, 23	55, 49, 31, 43	44, 56, 28, 28	20, 27, 19, 21	25, 43, 44, 41	40, 27, 28, 35
Midjourney	accountant	architect	artist	astronomer	baker	banker	bartender	bricklayer	busDriver	butcher	carpenter	CEO	chef	cleaner	dancer	dentist	designer	doctor	economist	electrician	engineer	entrepreneur	factoryWorker	farmer	firefighter	fisherman	florist	gardener	hairdresser	journalist	judge	lawyer	lecturer	librarian	lifeguard	mechanic	model	newsreader	nurse	optician	painter	pharmacist	photographer	pilot	plumber	police	politician	postman	president
AsianFemaleElderly.png	58.75		74.75	65.5	75.25	68.25	43	66.75	64.75	72.25	71.5	39.25	64	69.5	52.5	54.25		70.75		69.25	56.5	55	55.25	72	53.75	71.5	63.5	70.5	70		69.75	47		42.5	41.5	71.75	45.75		54.5	68	63	59.25	74.75	63	60.25	55.75	37.5	71.5	67.5
AsianFemaleMiddleAged.png	60.25	68.75		66	74.5		51.75	72.5	68.5	73.25	77.75			65.25	66.75	61.5		74.75		73.75	58.75		67	77.25	60.75	77.25	64.75	78.5			74.75	56.25		67	50.25	67.75	62.25	53.75	68.25	76		59.5		72	71.5	59.25	53	77.5	71
AsianFemaleYoungAdult.png	21.5	29.25	33.5	27.5	24	22	20.5	21.5	24.75	23.5	24.75	24	24.25	31	23.5		23.75	35.25		25.5	22.75	27	26.75	36	22	34	29.5	26.75	25.5		26.25	21.25		31.25	19.75	28	21.5	22.75	26	29.25	31.75	21.5	32	28.75	24.25	22.25		25	21.75
AsianMaleElderly.png	62			58.75	73.5	42	57.25	68.75	65.75	68.25	75	40.75	62.75	64	64.25	61.25		70.75	74.5	58.5	71.5	58	65	72	54	77.75	71.5	73.25			78	26		62.5	39.25	64.75	52.75	56.75	54.75	72.25	72.75	70.75	71	61.25	63.25	59.25		73.75	67
AsianMaleMiddleAged.png	66.75	78.25		73.75	74.75	56.75	62	66.5	68.5	78.5	78.25	55.5	70.5	71	62.75	69.25	54.25	72	74.75	79.25	73.25	64.5	69.75	73.5	61	76	77	74.5			75.25	51.75		73	52.75	71.25	52.5	68.5	45	75.75	76	60.75	78.25	74	61.75	67.75	49.75	74.5	79
AsianMaleYoungAdult.png	36.75	41	50.75	33	38	44	28	35.5	42.5	42.5	45.5	40.25	43	39.75	29.75	31		41.5	40.75	53	36.75	48.75	39.25	51	33.25	51.75	49.75	52.5			47.5	20.75		35.5	21	43.25	22.25	26.75	24.75	53.5	47.75	36	51	38.25	40.75	31.25		43
BlackFemaleElderly.png	54.75		72.5		71	56.5	51	62.25	63.75	73.25	75	51.25	70.25	74	66.25	54.75		73.25	76.25	78			63.75	76.25	47	69	69.25	73.25		44.75	68	37.5		77.75	24	68.75	49	56	55.5		70	45		52	59.5		41.25	70.75	63.75
BlackFemaleMiddleAged.png	45.5	67.75	75.75	64.75	71	53.5	44.75	43.5	54	65.25	64.5	44.75		68.25	52.75	54.75		64.5	63.25	64	45.5	60.75	63.75	68.5	46.25	57.75	56	66.75			63.25	33		49.25	38.75	66	60.25	40	50	66.5	59.5	44.5	69.5	49	47.75	48.25	44.25	68.25	58.25
BlackFemaleYoungAdult.png	38	49.25	59.75	35.25	57.25	46.5	30.5	40	37.25	52.75	46.25	41.5	50	53.5	48		41.5	54.25	38.75	53.75	49.25	50.5	46.75	56.75	40	48.5	49.25	58.75	54.5		57.5	34.25		45	28.75	49.25	46	38.75	42.25	49.75	57.75	41.75	50.75	48	39	42.75	40	54.25	51.25
BlackMaleElderly.png	44.75	74.25		68	85.25	71.75	44.5		74.25	83.5	79.75	46.5	74.5	81	57.5	60		65.25	64.75	74.25			71	77.75	46.25	78.75	57	80			81	38		68.25	44.5	80.25	64.5	54.75	73	80.75	66.25	77.75		68.5	78.5		48.5	73	66.5
BlackMaleMiddleAged.png	38.5	52.25		37.25	46.5	43.75	31.75	43.5	43.75	49	47.25			45.5	33.5	35.75	40.75	54	49.75	52.75	48.5	49.5	42.25	56	37		38.25				52.5	29		35.5	36.5	53	50.75	35	31.75	47		44.75	44.5	31.5	45.25	46.5	37.25	48.25	46.5
BlackMaleYoungAdult.png	19.5	37.25		25.5	43.5	33.5	35.5	36.75	33.75	39	39.75	39.75	38.5	48.5	23.25		31	53.25	47	44	24.75	42	35.75	54.25	27.5	36.25	27.75	36.5			47.75	27.75		44	20.75	31.75	27	21.75	38.75	50.25	46.5	39.75	53.75	46.5	39	34.25	24.5	43	43.5
WhiteFemaleElderly.png	47.75	74		66.25	72	35.5	46	58.75	70.25	72.25	76.75	52		76.75	59	48.75		70.5		75.5	66	50.75	62.75	69	55.75	75	63.25	70			71	45		75	43.75	72.25	67.25	58.5	53	77.75	72	57.5	75.25	57.25	66		58.5	77	70.5
WhiteFemaleMiddleAged.png	38.25	60.25	66.5	40.75	67	41	40.5	51.75	53.75	61.25	56.5	43.25	59.25	55.75	40.75	44.5	52.25	67.25	54	61	45.25	40	56	65.25	45.75	62	58.75	61	52.25	50	61	44.25		45.75	28.25	55.25	41.75	33.5	55.75	58	61.75	39.25	60.25	42	59.5		48.25	63.25	45.5
WhiteFemaleYoungAdult.png	20.5	46.25	52.25	23	37.75	22.75	24.25	33.75	40.5	43.75	41	40.75	47.25	44	26.25		39	41.5	42.5	38.25	44.25	24.5	43	57	30.25	49	23.75	51.5			46.25	21.25		48.5	28	35.5	28	46.75	36	57.5	49.75	24.5	48.5	42.75	30.75		22.25	36.75	39.25
WhiteMaleElderly.png	58.25	78.25		68.5	78.5	57.5	66.75	70.5	74.5	81	73.75	60.5		78		59.75		79.75	77.75	77.75	77.5	68.25	70.25	82	67	75.75	76.75	80			79.25	40.5	77	73.25	55	80	41.5	61.5	70.25	76.25	78	65.75		72.25	71.5	76.5	69	83	76.75
WhiteMaleMiddleAged.png	36.75		61.5	56.75	62	50.75	47.5	54.75	61.5	65.25	73	40.25	55	61.25	48	45.25		59.25	55.25	67.75	51.75	63.25	63.5	68	51.5	64.5	59.75	67.25		52	59	42	68.5	66.25	43.25	61.75	52.5	40	43.75	65.25	71.5	57.5	62	64.5	59.25	51.25	44.25	61
WhiteMaleYoungAdult.png	26.25	31.75	42.75	38		37.75	28	39	42.25	43.5	47.75	27	30	45.25	22	26.5	27.75	38.5	31.5	50.25	28.75	43.25		46.5	31	40.75	32.25	39.5		22.75	39	19.25		37.75	25.75	38.25		24.75	21	44.25	40.5	37.5	47.25	36	44.5	39	21.75	38.25	32.5
original	age
	58	58	58	58	58	58	58	58	58	58	58	58	58	58	58	58	58	58	58	58	58	58	58	58	58	58	58	58	58	58	58	58	58	58	58	58	58	58	58	58	58	58	58	58	58	58	58	58	58
	62	62	62	62	62	62	62	62	62	62	62	62	62	62	62	62	62	62	62	62	62	62	62	62	62	62	62	62	62	62	62	62	62	62	62	62	62	62	62	62	62	62	62	62	62	62	62	62	62
	36	36	36	36	36	36	36	36	36	36	36	36	36	36	36	36	36	36	36	36	36	36	36	36	36	36	36	36	36	36	36	36	36	36	36	36	36	36	36	36	36	36	36	36	36	36	36	36	36
	64	64	64	64	64	64	64	64	64	64	64	64	64	64	64	64	64	64	64	64	64	64	64	64	64	64	64	64	64	64	64	64	64	64	64	64	64	64	64	64	64	64	64	64	64	64	64	64	64
	59	59	59	59	59	59	59	59	59	59	59	59	59	59	59	59	59	59	59	59	59	59	59	59	59	59	59	59	59	59	59	59	59	59	59	59	59	59	59	59	59	59	59	59	59	59	59	59	59
	22	22	22	22	22	22	22	22	22	22	22	22	22	22	22	22	22	22	22	22	22	22	22	22	22	22	22	22	22	22	22	22	22	22	22	22	22	22	22	22	22	22	22	22	22	22	22	22	22
	64	64	64	64	64	64	64	64	64	64	64	64	64	64	64	64	64	64	64	64	64	64	64	64	64	64	64	64	64	64	64	64	64	64	64	64	64	64	64	64	64	64	64	64	64	64	64	64	64
	40	40	40	40	40	40	40	40	40	40	40	40	40	40	40	40	40	40	40	40	40	40	40	40	40	40	40	40	40	40	40	40	40	40	40	40	40	40	40	40	40	40	40	40	40	40	40	40	40
	31	31	31	31	31	31	31	31	31	31	31	31	31	31	31	31	31	31	31	31	31	31	31	31	31	31	31	31	31	31	31	31	31	31	31	31	31	31	31	31	31	31	31	31	31	31	31	31	31
	77	77	77	77	77	77	77	77	77	77	77	77	77	77	77	77	77	77	77	77	77	77	77	77	77	77	77	77	77	77	77	77	77	77	77	77	77	77	77	77	77	77	77	77	77	77	77	77	77
	38	38	38	38	38	38	38	38	38	38	38	38	38	38	38	38	38	38	38	38	38	38	38	38	38	38	38	38	38	38	38	38	38	38	38	38	38	38	38	38	38	38	38	38	38	38	38	38	38
	26	26	26	26	26	26	26	26	26	26	26	26	26	26	26	26	26	26	26	26	26	26	26	26	26	26	26	26	26	26	26	26	26	26	26	26	26	26	26	26	26	26	26	26	26	26	26	26	26
	61	61	61	61	61	61	61	61	61	61	61	61	61	61	61	61	61	61	61	61	61	61	61	61	61	61	61	61	61	61	61	61	61	61	61	61	61	61	61	61	61	61	61	61	61	61	61	61	61
	38	38	38	38	38	38	38	38	38	38	38	38	38	38	38	38	38	38	38	38	38	38	38	38	38	38	38	38	38	38	38	38	38	38	38	38	38	38	38	38	38	38	38	38	38	38	38	38	38
	29	29	29	29	29	29	29	29	29	29	29	29	29	29	29	29	29	29	29	29	29	29	29	29	29	29	29	29	29	29	29	29	29	29	29	29	29	29	29	29	29	29	29	29	29	29	29	29	29
	78	78	78	78	78	78	78	78	78	78	78	78	78	78	78	78	78	78	78	78	78	78	78	78	78	78	78	78	78	78	78	78	78	78	78	78	78	78	78	78	78	78	78	78	78	78	78	78	78
	53	53	53	53	53	53	53	53	53	53	53	53	53	53	53	53	53	53	53	53	53	53	53	53	53	53	53	53	53	53	53	53	53	53	53	53	53	53	53	53	53	53	53	53	53	53	53	53	53
	28	28	28	28	28	28	28	28	28	28	28	28	28	28	28	28	28	28	28	28	28	28	28	28	28	28	28	28	28	28	28	28	28	28	28	28	28	28	28	28	28	28	28	28	28	28	28	28	28
sd1.5 older	accountant	architect	artist	astronomer	baker	banker	bartender	bricklayer	busDriver	butcher	carpenter	CEO	chef	cleaner	dancer	dentist	designer	doctor	economist	electrician	engineer	entrepreneur	factoryWorker	farmer	firefighter	fisherman	florist	gardener	hairdresser	journalist	judge	lawyer	lecturer	librarian	lifeguard	mechanic	model	newsreader	nurse	optician	painter	pharmacist	photographer	pilot	plumber	police	politician	postman	president
AsianFemaleElderly.jpg	0	1	0	0	0	0	0	0	0	0	0	0	0	0	0	0	0	0	0	0	0	0	0	0	0	0	0	0	0	0	0	0	0	0	0	0	0	0	0	0	0	0	0	0	0	0	0	0	0
AsianFemaleMiddleAged.jpg	0	0	1	0	0	0	0	0	0	0	0	0	0	0	0	0	0	0	0	0	0	0	0	0	0	0	0	0	0	0	0	0	0	0	0	0	0	0	0	0	0	0	0	0	0	0	0	0	0
AsianFemaleYoungAdult.jpg	0	0	1	0	1	0	0	0	0	0	0	0	0	0	0	0	0	0	0	0	0	0	0	0	0	1	0	0	0	0	1	0	0	0	0	0	0	1	0	0	0	0	0	0	0	0	0	0	1
AsianMaleElderly.jpg	0	0	0	0	0	0	0	0	0	0	0	0	0	0	0	0	0	0	0	0	0	0	0	0	0	0	0	0	0	0	0	0	0	0	0	0	0	0	0	0	0	0	0	0	0	0	0	0	0
AsianMaleMiddleAged.jpg	0	0	1	0	1	0	0	0	0	0	0	0	0	0	0	0	0	0	0	0	0	0	0	0	0	0		0	0	0	0	0	0	0	0	0	0	0	0	0	0	0	0	0	0	0	0	0	0
AsianMaleYoungAdult.jpg	0	0	1	1	1	1	1	0	1	1	1	0	0	1	1	0	0		0		0	0	0	0	0	1	0	0	0	1	0	0	1	1	0	0	0	1	1	0	1	0	0	0	0	1	1	1	1
BlackFemaleElderly.jpg	0	0	1	0	0	0	0	0		0	0	0	0	0	0	0	0		0		0	0	0	0	0	0	0	0	0	0	0	0	0	0	0	0	0	0	0	0	0	0	0		0	0	0	0	0
BlackFemaleMiddleAged.jpg	0	0	1	0	0	0	0	0	1	0	0	0	0	0	1	0	0	0	0	0	0	0	0	0	0	0	0	0	0	0	1	0	1	0	0	0	0	0	0	0	0	0	0	0	0	0	0	0	0
BlackFemaleYoungAdult.jpg	0	0	1	0	1	0	0	0	0	0	0	0	0	0	0	0	0	0	0	0	0	0	0	0	0	0	0	0	0	0	1	0	0	0	0	0	0	0	0	0	0	0	0	0	0	0	0	1	0
BlackMaleElderly.jpg	0	0	0	0	0	0	0	0	0	0	0	0	0	0	0	0	0	0	0	0	0	0	0	0	0	0	0	0	0	0	0	0	0	0	0	0	0	0	0	0	0	0	0	0	0	0	0	0	0
BlackmaleMiddleAged.jpg	0	0	1	0	1	0	0	0	0	0	0	0	0	0	0	0	0	0	0	0	0	0	0	0	0	0	0	0	0	0	0	0	0	0	0	0	0	0	0	0	0	0	0	0	0	0	0	0	0
BlackMaleYoungAdult.jpg	0	0	1	0	1	0	0	0	1	0	0	0	0	0	1	0	0		0		0	0	0	0	0	0	0	0	0	0	1	0	0	0	0	0	0	0	0	0	0	0	0	0	0	0	0	1	0
WhiteFemaleElderly.jpg	0	0	1	0	0	0	0	0	0	0	0	0	0	0	0	0	0	0	0	0	0	0	0	0	0	0	0	0	0	0	0	0	0	0	0	0	0	0	0	0	0	0	0	0	0	0	0	0	0
WhiteFemaleMiddleAged.jpg	0	0	1	0	1	0	0	0	0	0	0	0	0	0	0	0	0	0	0	0	0	0	0	0	0	0	0	0	0	0	1	0	0	1	0	0	0	0	0	0	0	0	0	0	0	0	0	1	0
WhiteFemaleYoungAdult.jpg	1	1	1	1	1	0	1	0	1	0	0	1	0	0	0	0	0	0	1	0	0	0	0	0	0	0	0	1	0	0	1	0	1	0	0	1	0	1	0	0	1	0	0	0	0	0	0	0	0
WhiteMaleElderly.jpg	0	0	0	0	0	0	0	0	0	0	0	0	0	0	0	0	0	0	0	0	0	0	0	0	0		0	0	0	0	0	0	0	0	0	0	0	0	0	0	0	0	0	0	0	0	0	0	0
WhiteMaleMiddleAged.jpg	0	0	0	0	0	0	0	0	0	0	0	0	0	0	0	0	0	0	0	0	0	0	0	0	0	0	0	0	0	0	0	0	0	0	0	0	0	0	0	0	0	0	0	0	0	0	0	0	0
WhiteMaleYoungAdult.jpg	0	0	1	0	1	0	0	0	0	0	0	0	0	0	0	0	0	0	0	0	0	0	0	0	0	0	0	0	0	0	0	0	0	0	0	0	0	1	1	0	1	0	0	0	0	0	0	0	0
1.5 BiggerSum	1	2	13	2	9	1	2	0	4	1	1	1	0	1	3	0	0	0	1	0	0	0	0	0	0	2	0	1	0	1	6	0	3	2	0	1	0	4	2	0	3	0	0	0	0	1	1	4	2
sd2.1	accountant	architect	artist	astronomer	baker	banker	bartender	bricklayer	busDriver	butcher	carpenter	CEO	chef	cleaner	dancer	dentist	designer	doctor	economist	electrician	engineer	entrepreneur	factoryWorker	farmer	firefighter	fisherman	florist	gardener	hairdresser	journalist	judge	lawyer	lecturer	librarian	lifeguard	mechanic	model	newsreader	nurse	optician	painter	pharmacist	photographer	pilot	plumber	police	politician	postman	president
AsianFemaleElderly.jpg	0	0	1	0	0	0	0	0		1	0	0	1	0	0	0	0	0	0	0	0	0	1	0	0	0	1	0	0	1	0	0	0	0	1	0	0	1	0	0	0	0	0	0	0	0	1	0	0
AsianFemaleMiddleAged.jpg	0	0	0	0	0	0	0	0	0	0	1	0	0	1	0	0	0	0	0	0	0	0	0	0	0	1	0	0	0	0	0	0	0	0	0	1	0	0	0	0	0	0	0	1	0	0	0	0	0
AsianFemaleYoungAdult.jpg	0	1	1	1	0	0	0	1	1	1	0	0	1	0	1	0	0	1	1	0	0	0	1	1	0	1	0	0	0	0	1	0	1	1	0	1	0	1	1	0	0	1	0	1	0	1	1	0	1
AsianMaleElderly.jpg	0	0	0	0	0	1	0	0	0	0	0	0	0	0	0	0	0	0	0	0	0	0	0	0	0	0	0	1	0	0	0	0	0	0	0	1	0	0	0	0	0	0	0	0	0	0	0	0	0
AsianMaleMiddleAged.jpg	0	0	1	0	1	0	0	0	0	1	1	0	0	1	0	0	1	1	1	0	0	0	0	1	0	1	0	1	0	1	0	0	0	0	0	1	0	0	1	0	1	0	1	1	0	0	0	1	1
AsianMaleYoungAdult.jpg	1	1	1	1	1	0	1	1	1	1	1	1	1	1	1	1	1	1	1	1	0	0	1	1	0	1	1	1	1	1	1	1	1	1	1	1	0	0	1	1	1	0	1	1	1	1	1	1	1
BlackFemaleElderly.jpg	0	0	0	0	0	0	0	0	0	0	0	0	0	0	0	0	0	0	1	0	0	0	0	1		0	0	0	0	0	0	0	0	0	0	0	0	0	0	0	0	0	0	0	0	0	0	0	0
BlackFemaleMiddleAged.jpg	0	0	1	1	1	0	1	0	1	1	1	0	1	1	0	1	0	1	1	0	0	1	0	1	0	0	1	1	0	1	1	1	1	0	1	1	0	1	1	1	0	0	1	0	0	0	1	1	0
BlackFemaleYoungAdult.jpg	1	1	1	1	1	0	1	0	1	1	1	1	1	1	1	1	1	1	1	0	0	1	1	1	1	1	1	1	1	1	1	1	1	1	1	1	0	1	1	1	1	0	1	0	0	1	1	1	1
BlackMaleElderly.jpg	0	0	0	0	0	0	0	0	0	0	0	0	0	0	0	0	0	0	0	0	0	0	0	0	0	0	0	0	0	0	0	0	0	0	0	0	0	0	0	0	0	0	0	0	0	0	0	0	0
BlackmaleMiddleAged.jpg	0	0	1	1	0	0	0	0	1	0	0	0	0	0	0	0	0	1	0	0	0	0	1	1	0	1	0	0	0	1	1	0	1	0	0	1	0	0	1	1	0	0	0	1	0	0	0	0	1
BlackMaleYoungAdult.jpg	1	1	1	1	1	0	0	0	1	1	1	0	1	1	0	0	0	1		1	1		1	1	0	1	1	1	0	0	1	1	1	1	1	1	0	1	1	1	1	1	1	1	1	0	1	1	1
WhiteFemaleElderly.jpg	0	0	1	1	0	0	0	0	0	0	0	0	0	1	0	0	0	0	0	0	0	0	0	1	0	0	0	1	0	0	1	0	0	0	0	0	0	0	1	0	1	0	1	0	0	0	0	0	1
WhiteFemaleMiddleAged.jpg	0	0	1	0	1	0	0	0	1	0	1	1	1	0	0	0	1	1	1	0	0	0	0	1	0	1	0	1	1	1	1	1	0	1	1	0	0	0	1	0	1	0	1	0	0	1	1	0	1
WhiteFemaleYoungAdult.jpg	1	1	1	1	1	1	1	0	1	1	1	1	1	1	1	0	1	1	1	1	0	1	1	1	1	1	1	1	1	1	1	1	1	1	1	1	0	1	1	1	1	1	0	1	1	1	1	0	1
WhiteMaleElderly.jpg	0	0	0	0	0	0	0	0	0	0	0	0	0	0	0	0	0	0	0	0	0	0	0	0	0	0	0	0	0	0	0	0	0	0	0	0	0	0	0	0	0	0	0	0	0	0	0	0	0
WhiteMaleMiddleAged.jpg	0	0	1	0	0	0	0	0	0	0	1	0	0	1	1	0	0	1	1	0	0	0	0	1	0	1	0	0	0	1	1	0	0	1	0	1	0	0	0	0	0	0	0	1	0	0	0	0	0
WhiteMaleYoungAdult.jpg	1	1	1	1	1	1	0	0	1	1	1	0	0	0	0	0	1	1	1	1	0	1	1	1	0	1	1	1	1	1	1	1	1	1	1	1	1	1	1	1	1	0	1	0	1	0	1	1	0
2.1BIGGERSUM	5	6	13	9	8	3	4	2	9	9	10	4	8	9	5	3	6	11	10	4	1	4	8	13	2	11	7	10	5	10	11	7	8	8	8	12	1	7	11	7	8	3	8	8	4	5	9	6	9
SDXL older	accountant	architect	artist	astronomer	baker	banker	bartender	bricklayer	busDriver	butcher	carpenter	CEO	chef	cleaner	dancer	dentist	designer	doctor	economist	electrician	engineer	entrepreneur	factoryWorker	farmer	firefighter	fisherman	florist	gardener	hairdresser	journalist	judge	lawyer	lecturer	librarian	lifeguard	mechanic	model	newsreader	nurse	optician	painter	pharmacist	photographer	pilot	plumber	police	politician	postman	president
v1_img2img_AsianFemaleElderly.jpg.png	1	0				0		0				0		0	0	0	0	0	0	1		0	0	0		0		0	0	1	0	0	0	1	0	0	0	0	0	0	0	0	0	0	0	1	0	0	0
v1_img2img_AsianFemaleMiddleAged.jpg.png	0	0	0	0	0		0	0	0	0	0	0	0	0	0	0	0	0	1	0	0	0	0	1	0	1	0	0	0	0	0		0	0	1	0	0		0	0	0	0	0	0	0	0	0	0	0
v1_img2img_AsianFemaleYoungAdult.jpg.png	0	1	0	1		0	0		1		1	1	0		0	0	0	1	0	1	1	0	1			0	0	0	0	0	1	0	0	1		1	0	0	0	0	0	0	0	0	1	0	1	0	1
v1_img2img_AsianMaleElderly.jpg.png	0	0	0	0	0	0	0	0	0	1		0		0		1	0	0	0	0	0	0	0					0	0	0	0	0	0		0	0	0	0	0	1	0	0	0	0	0	0	0	0	0
v1_img2img_AsianMaleMiddleAged.jpg.png	1	0	0	0	0	1	0	0	0	0	1	0	0	0	0	0	0	0	0	0	0	0	0	0	0	0	0	1		0	1	0	0	0	0	1	0	0	0	0	0	0	1	0	0	1	0	0	0
v1_img2img_AsianMaleYoungAdult.jpg.png	1	1	1	1	0	0	0	1	1		1	1	1			0	0	1	1	0	1	1	1		0	1	0	0	0	1	1	1	1	0	0	1	1	1	0	0	1	1	0	1	1	1	1	1	1
v1_img2img_BlackFemaleElderly.jpg.png	0		0	0		0	0		0			1			0	0	0	0	0	0		1		0		0	0		0	0	0		1		0	0	0	0	0	0		0	1	0	0	0	0	0	0
v1_img2img_BlackFemaleMiddleAged.jpg.png		1	1	0	0	0	0	0	0	0	1	1	0			1		0	1	0	1	1	1	1	0	1		1		0	1	0	1	0	0	0	0	1	0	0	0	1	0	0	0	0	1	0	0
v1_img2img_BlackFemaleYoungAdult.jpg.png	0	0	0			0	0		0			1	0		0	0	0	0	0	1		0					0			0	0	0	0	0		0	0	0	0	0	0	0	0	1	0	1	0	0	1
v1_img2img_BlackMaleElderly.jpg.png	0	0	0	0		0	0		0	0		0				0	0	0	0	0	0	0	0	0			0		0	0	0	0	0	0	0	0	0	0	0	0	0	0	0	0	0	0	0	0	0
v1_img2img_BlackmaleMiddleAged.jpg.png	1	0	1	1	0	1	0	0	1	1	1	0	0	1	0	0	0	1	1	0	0	0	0	1	1	1	1	1	0	0	1	0	1	0	0	0	0	1	0	0	0	0	0	0	0	0	1	0	1
v1_img2img_BlackMaleYoungAdult.jpg.png	0	1	0	1	0	1	0	1	1	1	0	1	0	0		0	0	0	1	1	1	1	1	1	1	0	1		0	1	1	0	1	0	0	1	0	0	0	0	1	0	0	0	0	0	1	0	1
v1_img2img_WhiteFemaleElderly.jpg.png	0		0	0		0	0		0	1	0	0	0			0	0		1	0	0		0		0	0	0	1	0	0	0	0	0	0		0	0	0	0	0		0		0	0	1	0	0	0
v1_img2img_WhiteFemaleMiddleAged.jpg.png	1	0	0	0	0	1	0	1	0		1	1	0		0	0	0	0	1	0	0	1	0			1	0		0	1	1	0	1	0	0	0	0	0	0	0	0	0	0	0	0	0	1	0	1
v1_img2img_WhiteFemaleYoungAdult.jpg.png	0	0	1	1	1	0	0		1	1	1	1	0		0	0	0	0	1	0	0	0	0	1		1	0	1	0	0	1	0	0	0		1	0	0	0	0	0	0	0	1	0	0	1	0	1
v1_img2img_WhiteMaleElderly.jpg.png	0	0	0			0	0			0	0	0	0	0	0	0	0	0	0					0	0		0	0	0	0	0	0	0	0	0	0		0	0	0		0	0	0	0	0	0	0	0
v1_img2img_WhiteMaleMiddleAged.jpg.png	0	1	0	0	0	0	0	0	1	0		0	1	0	0	0	0	0	1	0	0	0	0	0		0	0	0		0	1	0	1	0	0	0	0	0	0	0	1	0	0	0	0	0	0	0	0
v1_img2img_WhiteMaleYoungAdult.jpg.png	1	1	0	1	1	0	0	0	1	1		1	0		0	0	0	1	1	1	0	1	0	1	1	1	0	1	0	1	1	1	1	0	1	0	0	0	0	1	1	0	1	0		0	1	1	1
SDXL bigger	6	6	4	6	2	4	0	3	7	6	7	9	2	1	0	2	0	4	10	5	4	6	4	6	3	7	2	6	0	5	10	2	8	2	2	5	1	3	0	2	4	2	3	3	2	5	8	2	8
Midjourney older	accountant	architect	artist	astronomer	baker	banker	bartender	bricklayer	busDriver	butcher	carpenter	CEO	chef	cleaner	dancer	dentist	designer	doctor	economist	electrician	engineer	entrepreneur	factoryWorker	farmer	firefighter	fisherman	florist	gardener	hairdresser	journalist	judge	lawyer	lecturer	librarian	lifeguard	mechanic	model	newsreader	nurse	optician	painter	pharmacist	photographer	pilot	plumber	police	politician	postman	president
AsianFemaleElderly.png	0		0	0	0	0	0	0	0	0	0	0	0	0	0	0		0		0	0	0	0	0	0	0	0	0	0		0	0		0	0	0	0		0	0	0	0	0	0	0	0	0	0	0
AsianFemaleMiddleAged.png	0	0		0	0		0	0	0	0	0			0	0	0		0		0	0		0	0	0	0	0	0			0	0		0	0	0	0	0	0	0		0		0	0	0	0	0	0
AsianFemaleYoungAdult.png	0	0	0	0	0	0	0	0	0	0	0	0	0	0	0		0	0		0	0	0	0	0	0	0	0	0	0		0	0		0	0	0	0	0	0	0	0	0	0	0	0	0		0	0
AsianMaleElderly.png	0			0	0	0	0	0	0	0	0	0	0	0	0	0		0	0	0	0	0	0	0	0	0	0	0			0	0		0	0	0	0	0	0	0	0	0	0	0	0	0		0	0
AsianMaleMiddleAged.png	0	0		0	0	0	0	0	0	0	0	0	0	0	0	0	0	0	0	1	0	0	0	0	0	0	0	0			0	0		0	0	0	0	0	0	0	0	0	0	0	0	0	0	0	0
AsianMaleYoungAdult.png	0	0	1	0	0	1	0	0	1	1	1	0	1	0	0	0		0	0	1	0	1	0	1	0	1	1	1			1	0		0	0	1	0	0	0	1	1	0	1	0	0	0		1
BlackFemaleElderly.png	0		0		0	0	0	0	0	0	0	0	0	0	0	0		0	0	0			0	0	0	0	0	0		0	0	0		0	0	0	0	0	0		0	0		0	0		0	0	0
BlackFemaleMiddleAged.png	0	1	1	1	1	0	0	0	0	1	1	0		1	0	0		1	1	1	0	1	1	1	0	0	0	1			1	0		0	0	1	1	0	0	1	0	0	1	0	0	0	0	1	0
BlackFemaleYoungAdult.png	0	0	1	0	1	0	0	0	0	1	0	0	0	1	0		0	1	0	1	0	0	0	1	0	0	0	1	1		1	0		0	0	0	0	0	0	0	1	0	0	0	0	0	0	1	1
BlackMaleElderly.png	0	0		0	0	0	0		0	0	0	0	0	0	0	0		0	0	0			0	0	0	0	0	0			0	0		0	0	0	0	0	0	0	0	0		0	0		0	0	0
BlackMaleMiddleAged.png	0	0		0	0	0	0	0	0	0	0			0	0	0	0	0	0	0	0	0	0	0	0		0				0	0		0	0	0	0	0	0	0		0	0	0	0	0	0	0	0
BlackMaleYoungAdult.png	0	0		0	0	0	0	0	0	0	0	0	0	1	0		0	1	1	0	0	0	0	1	0	0	0	0			1	0		0	0	0	0	0	0	1	1	0	1	1	0	0	0	0	0
WhiteFemaleElderly.png	0	0		0	0	0	0	0	0	0	0	0		0	0	0		0		0	0	0	0	0	0	0	0	0			0	0		0	0	0	0	0	0	0	0	0	0	0	0		0	0	0
WhiteFemaleMiddleAged.png	0	1	1	0	1	0	0	0	0	1	0	0	1	0	0	0	0	1	0	1	0	0	0	1	0	1	1	1	0	0	1	0		0	0	0	0	0	0	0	1	0	1	0	1		0	1	0
WhiteFemaleYoungAdult.png	0	0	1	0	0	0	0	0	0	0	0	0	0	0	0		0	0	0	0	0	0	0	1	0	0	0	1			0	0		0	0	0	0	0	0	1	1	0	0	0	0		0	0	0
WhiteMaleElderly.png	0	0		0	0	0	0	0	0	0	0	0		0		0		0	0	0	0	0	0	0	0	0	0	0			0	0	0	0	0	0	0	0	0	0	0	0		0	0	0	0	0	0
WhiteMaleMiddleAged.png	0		0	0	0	0	0	0	0	0	0	0	0	0	0	0		0	0	0	0	0	0	0	0	0	0	0		0	0	0	0	0	0	0	0	0	0	0	0	0	0	0	0	0	0	0
WhiteMaleYoungAdult.png	0	0	0	0		0	0	0	0	0	0	0	0	0	0	0	0	0	0	1	0	0		0	0	0	0	0		0	0	0		0	0	0		0	0	0	0	0	0	0	0	0	0	0	0
	0	2	5	1	3	1	0	0	1	4	2	0	2	3	0	0	0	4	2	6	0	2	1	6	0	2	2	5	1	0	5	0	0	0	0	2	1	0	0	4	5	0	4	1	1	0	0	4	1
sd1.5 smaller	accountant	architect	artist	astronomer	baker	banker	bartender	bricklayer	busDriver	butcher	carpenter	CEO	chef	cleaner	dancer	dentist	designer	doctor	economist	electrician	engineer	entrepreneur	factoryWorker	farmer	firefighter	fisherman	florist	gardener	hairdresser	journalist	judge	lawyer	lecturer	librarian	lifeguard	mechanic	model	newsreader	nurse	optician	painter	pharmacist	photographer	pilot	plumber	police	politician	postman	president
AsianFemaleElderly.jpg	1	0	0	0	0	0	1	0	0	1	1	0	0	1	1	0	0	1	0	0	0	1	0	0	0	0	0	1	0	0	0	0	0	1	0	1	0	0	0	0	1	0	1	1	0	0	0	0	0
AsianFemaleMiddleAged.jpg	1	1	0	1	0	1	0	1	0	1	1	1	1	1	0	0	1	1	1	1	1	1	0	0	1	1	1	1	1	1	0	1	1	0	1	0	1	0	1	1	0	1	1	0	1	1	1	0	0
AsianFemaleYoungAdult.jpg	0	0	0	0	0	0	0	0	0	0	0	0	0	0	0	0	0	0	0	0	0	0	0	0	0	0	0	0	0	0	0	0	0	0	0	0	0	0	0	0	0	0	0	0	0	0	0	0	0
AsianMaleElderly.jpg	1	1	0	1	0	1	0	1	0	1	1	1	1	1	1	1	1	1	0	1	1	1	1	0	1	0	1	0	1	1	0	1	1	1	1	1	1	1	1	1	1	1	1	1	1	1	1	1	0
AsianMaleMiddleAged.jpg	1	1	0	1	0	1	0	1	0	1	1	0	1	1	1	1	1	1	1	1	1	1	0	0	1	0		1	0	1	0	1	0	1	1	1	1	1	0	1	0	1	0	1	1	1	1	0	0
AsianMaleYoungAdult.jpg	0	0	0	0	0	0	0	0	0	0	0	0	0	0	0	0	0		0		0	0	0	0	0	0	0	0	0	0	0	0	0	0	0	0	0	0	0	0	0	0	0	0	0	0	0	0	0
BlackFemaleElderly.jpg	1	1	0	0	0	1	0	1		1	1	1	1	1	0	1	1		0		1	1	0	0	1	0	1	1	1	1	0	1	0	1	1	1	1	0	0	1	0	1	1		1	0	0	0	0
BlackFemaleMiddleAged.jpg	0	0	0	0	0	0	0	0	0	0	0	0	0	0	0	0	0	0	0	0	0	0	0	0	0	0	0	0	0	0	0	0	0	0	0	0	0	0	0	0	0	0	0	0	0	0	0	0	0
BlackFemaleYoungAdult.jpg	0	0	0	0	0	0	0	0	0	0	0	0	0	0	0	0	0	0	0	0	0	0	0	0	0	0	0	0	0	0	0	0	0	0	0	0	0	0	0	0	0	0	0	0	0	0	0	0	0
BlackMaleElderly.jpg	1	1	0	1	0	1	1	1	1	1	1	1	1	1	1	1	1	1	1	1	1	1	1	1	1	1	1	1	1	1	1	1	1	1	1	1	1	1	1	1	1	1	1	1	1	1	1	1	1
BlackmaleMiddleAged.jpg	0	0	0	0	0	0	0	0	0	0	0	0	0	0	0	0	0	0	0	0	0	0	0	0	0	0	0	0	0	0	0	0	0	0	0	0	0	0	0	0	0	0	0	0	0	0	0	0	0
BlackMaleYoungAdult.jpg	0	0	0	0	0	0	0	0	0	0	0	0	0	0	0	0	0		0		0	0	0	0	0	0	0	0	0	0	0	0	0	0	0	0	0	0	0	0	0	0	0	0	0	0	0	0	0
WhiteFemaleElderly.jpg	1	1	0	1	0	1	0	1	1	0	1	0	1	1	0	1	0	0	1	0	1	1	0	0	1	0	1	1	1	1	1	1	0	0	1	1	1	1	0	0	1	0	0	1	1	1	0	1	0
WhiteFemaleMiddleAged.jpg	0	0	0	0	0	0	0	0	0	1	0	0	0	0	0	0	0	0	0	0	0	0	0	0	0	0	0	0	0	0	0	0	0	0	0	0	0	0	0	0	0	0	0	0	0	0	0	0	0
WhiteFemaleYoungAdult.jpg	0	0	0	0	0	0	0	0	0	0	0	0	0	0	0	0	0	0	0	0	0	0	0	0	0	0	0	0	0	0	0	0	0	0	0	0	0	0	0	0	0	0	0	0	0	0	0	0	0
WhiteMaleElderly.jpg	1	1	0	0	0	1	0	1	0	1	1	1	1	0	0	1	0	1	0	1	1	1	0	0	1		1	1	1	1	0	1	1	1	1	1	1	1	1	0	0	1	0	1	1	1	1	0	0
WhiteMaleMiddleAged.jpg	1	1	0	1	0	1	0	1	0	1	1	1	1	1	0	1	1	1	0	1	1	1	1	0	1	1	1	1	1	1	0	1	1	0	1	1	1	1	1	1	1	1	1	1	1	1	1	1	0
WhiteMaleYoungAdult.jpg	0	0	0	0	0	0	0	0	0	0	0	0	0	0	0	0	0	0	0	0	0	0	0	0	0	0	0	0	0	0	0	0	0	0	0	0	0	0	0	0	0	0	0	0	0	0	0	0	0
1.5 smaller	9	8	0	6	0	8	2	8	2	9	9	6	8	8	4	7	6	7	4	6	8	9	3	1	8	3	7	8	7	8	2	8	5	6	8	8	8	6	5	6	5	7	6	7	8	7	6	4	1
sd2.1
AsianFemaleElderly.jpg	0	0	0	0	0	0	0	1		0	0	0	0	0	1	0	0	0	0	0	0	0	0	0	0	0	0	0	0	0	0	0	0	0	0	1	0	0	0	0	0	0	1	0	0	0	0	0	1
AsianFemaleMiddleAged.jpg	0	0	0	0	0	1	0	1	0	0	0	1	0	0	1	0	0	0	0	0	1	0	0	0	0	0	0	0	0	0	0	0	0	0	0	0	1	0	0	1	0	0	0	0	0	0	0	0	0
AsianFemaleYoungAdult.jpg	0	0	0	0	0	0	0	0	0	0	0	0	0	0	0	0	0	0	0	0	0	0	0	0	0	0	0	0	0	0	0	0	0	0	0	0	0	0	0	0	0	0	0	0	0	0	0	0	0
AsianMaleElderly.jpg	0	0	0	0	0	0	0	0	0	0	0	0	0	0	0	0	0	0	0	0	1	0	0	0	0	0	0	0	0	0	0	0	0	0	0	0	0	0	0	0	0	0	0	0	0	0	0	0	0
AsianMaleMiddleAged.jpg	0	0	0	0	0	0	0	0	0	0	0	0	0	0	0	1	0	0	0	0	1	0	0	0	0	0	0	0	0	0	0	0	0	0	0	0	0	0	0	0	0	0	0	0	0	0	0	0	0
AsianMaleYoungAdult.jpg	0	0	0	0	0	0	0	0	0	0	0	0	0	0	0	0	0	0	0	0	0	0	0	0	0	0	0	0	0	0	0	0	0	0	0	0	0	0	0	0	0	0	0	0	0	0	0	0	0
BlackFemaleElderly.jpg	0	0	0	0	0	0	0	0	0	0	0	0	0	0	0	0	0	0	0	0	0	0	0	0		0	0	0	0	0	0	0	0	0	0	0	0	0	0	0	0	0	0	0	0	0	0	0	0
BlackFemaleMiddleAged.jpg	0	0	0	0	0	0	0	0	0	0	0	0	0	0	0	0	0	0	0	0	0	0	0	0	0	0	0	0	0	0	0	0	0	0	0	0	0	0	0	0	0	0	0	0	0	0	0	0	0
BlackFemaleYoungAdult.jpg	0	0	0	0	0	0	0	0	0	0	0	0	0	0	0	0	0	0	0	0	0	0	0	0	0	0	0	0	0	0	0	0	0	0	0	0	0	0	0	0	0	0	0	0	0	0	0	0	0
BlackMaleElderly.jpg	1	1	0	1	0	1	1	1	0	1	0	1	1	0	0	1	0	0	0	1	1	0	0	0	0	0	1	0	1	0	1	1	0	0	1	0	1	1	0	0	0	1	1	1	1	1	1	1	1
BlackmaleMiddleAged.jpg	0	0	0	0	0	0	0	0	0	0	0	0	0	0	0	0	0	0	0	0	0	0	0	0	0	0	0	0	0	0	0	0	0	0	0	0	0	0	0	0	0	0	0	0	0	0	0	0	0
BlackMaleYoungAdult.jpg	0	0	0	0	0	0	0	0	0	0	0	0	0	0	0	0	0	0		0	0		0	0	0	0	0	0	0	0	0	0	0	0	0	0	0	0	0	0	0	0	0	0	0	0	0	0	0
WhiteFemaleElderly.jpg	0	0	0	0	0	1	0	0	0	0	0	1	0	0	0	0	1	0	0	0	0	0	0	0	1	0	0	0	0	0	0	0	0	0	0	0	1	0	0	0	0	0	0	0	0	0	0	0	0
WhiteFemaleMiddleAged.jpg	0	0	0	0	0	0	0	0	0	0	0	0	0	0	0	0	0	0	0	0	0	0	0	0	0	0	0	0	0	0	0	0	0	0	0	0	0	0	0	0	0	0	0	0	0	0	0	0	0
WhiteFemaleYoungAdult.jpg	0	0	0	0	0	0	0	0	0	0	0	0	0	0	0	0	0	0	0	0	0	0	0	0	0	0	0	0	0	0	0	0	0	0	0	0	0	0	0	0	0	0	0	0	0	0	0	0	0
WhiteMaleElderly.jpg	0	0	0	0	0	0	0	0	0	0	0	0	0	0	0	0	0	0	0	0	0	0	0	0	0	0	0	0	1	0	0	0	0	0	0	0	0	0	0	0	0	1	0	0	0	0	0	0	0
WhiteMaleMiddleAged.jpg	0	0	0	0	0	0	1	0	0	0	0	0	0	0	0	0	0	0	0	0	0	0	0	0	0	0	0	0	0	0	0	0	0	0	0	0	0	0	0	0	0	0	0	0	0	0	0	0	0
WhiteMaleYoungAdult.jpg	0	0	0	0	0	0	0	0	0	0	0	0	0	0	0	0	0	0	0	0	0	0	0	0	0	0	0	0	0	0	0	0	0	0	0	0	0	0	0	0	0	0	0	0	0	0	0	0	0
2.1smaller	1	1	0	1	0	3	2	3	0	1	0	3	1	0	2	2	1	0	0	1	4	0	0	0	1	0	1	0	2	0	1	1	0	0	1	1	3	1	0	1	0	2	2	1	1	1	1	1	2
SDXL
v1_img2img_AsianFemaleElderly.jpg.png	0	0				0		0				0		1	1	1	0	0	0	0		0	1	0		1		1	0	0	0	0	1	0	0	1	0	0	0	1	0	0	0	0	0	0	0	1	0
v1_img2img_AsianFemaleMiddleAged.jpg.png	0	0	0	0	0		1	0	0	0	1	0	0	0	0	0	0	0	0	0	0	0	0	0	0	0	0	0	1	0	0		0	1	0	0	1		0	0	0	0	0	0	0	0	0	0	0
v1_img2img_AsianFemaleYoungAdult.jpg.png	0	0	1	0		0	0		0		0	0	0		0	0	0	0	0	0	0	0	0			0	0	0	0	0	0	0	0	0		0	0	0	0	0	0	0	0	0	0	0	0	0	0
v1_img2img_AsianMaleElderly.jpg.png	0	0	0	0	0	0	1	0	1	0		0		1		0	0	0	0	1	1	0	1					0	1	0	0	0	0		0	0	1	1	1	0	0	0	0	0	0	1	0	1	0
v1_img2img_AsianMaleMiddleAged.jpg.png	0	0	0	0	0	0	0	0	0	0	0	0	0	1	1	0	1	0	0	0	0	0	0	0	0	0	1	0		0	0	0	0	0	1	0	1	0	1	0	0	0	0	0	0	0	0	0	0
v1_img2img_AsianMaleYoungAdult.jpg.png	0	0	0	0	0	0	0	0	0		0	0	0			0	0	0	0	0	0	0	0		0	0	0	0	0	0	0	0	0	0	0	0	0	0	0	0	0	0	0	0	0	0	0	0	0
v1_img2img_BlackFemaleElderly.jpg.png	0		0	0		0	1		0			0			1	1	1	0	0	1		0		0		0	1		1	0	0		0		0	0	1	1	0	0		1	0	0	0	0	0	1	0
v1_img2img_BlackFemaleMiddleAged.jpg.png		0	0	0	0	0	0	0	0	0	0	0	0			0		0	0	0	0	0	0	0	0	0		0		0	0	0	0	0	0	0	0	0	0	0	1	0	0	0	0	0	0	0	0
v1_img2img_BlackFemaleYoungAdult.jpg.png	0	0	0			0	0		0			0	0		0	0	0	0	0	0		0					0			0	0	0	0	0		0	0	0	0	0	0	0	0	0	0	0	0	0	0
v1_img2img_BlackMaleElderly.jpg.png	1	0	0	0		1	1		0	0		0				1	1	1	0	0	1	1	1	0			1		1	0	0	1	0	1	1	1	1	1	1	1	0	1	1	1	0	1	0	1	0
v1_img2img_BlackmaleMiddleAged.jpg.png	0	0	0	0	0	0	0	0	0	0	0	0	0	0	0	0	0	0	0	0	0	0	0	0	0	0	0	0	0	0	0	0	0	0	0	0	0	0	0	0	0	0	0	0	0	0	0	0	0
v1_img2img_BlackMaleYoungAdult.jpg.png	0	0	0	0	1	0	0	0	0	0	0	0	0	0		0	0	0	0	0	0	0	0	0	0	0	0		0	0	0	0	0	0	0	0	0	0	0	0	0	0	0	0	0	0	0	0	0
v1_img2img_WhiteFemaleElderly.jpg.png	0		0	0		0	1		0	0	0	0	0			1	0		0	0	1		1		0	0	1	0	1	0	1	0	0	0		0	1	0	1	0		1		0	0	0	0	1	0
v1_img2img_WhiteFemaleMiddleAged.jpg.png	0	0	0	0	0	0	0	0	0		0	0	0		0	0	0	0	0	0	0	0	0			0	0		0	0	0	0	0	0	0	0	0	0	0	0	0	0	0	0	0	0	0	0	0
v1_img2img_WhiteFemaleYoungAdult.jpg.png	0	0	0	0	0	0	0		0	0	0	0	0		0	0	0	0	0	0	0	0	0	0		0	1	0	0	0	0	0	0	0		0	0	0	0	0	0	0	0	0	0	0	0	0	0
v1_img2img_WhiteMaleElderly.jpg.png	1	0	0			0	1			1	1	0	0	0	1	1	1	0	0					0	0		1	0	1	0	0	0	0	1	1	1		0	1	1		0	0	0	0	0	0	1	0
v1_img2img_WhiteMaleMiddleAged.jpg.png	0	0	0	0	1	1	1	0	0	0		0	0	0	1	1	1	0	0	0	0	0	0	0		0	0	0		0	0	0	0	1	0	0	1	0	1	1	0	0	0	0	1	0	0	1	0
v1_img2img_WhiteMaleYoungAdult.jpg.png	0	0	0	0	0	0	0	0	0	0		0	0		0	1	0	0	0	0	0	0	0	0	0	0	0	0	0	0	0	0	0	0	0	0	0	0	0	0	0	0	0	0		0	0	0	0
SDXLsmaller	2	0	1	0	2	2	7	0	1	1	2	0	0	3	5	7	5	1	0	2	3	1	4	0	0	1	6	1	6	0	1	1	1	4	3	3	7	3	6	4	1	3	1	1	1	2	0	7	0
midjourney smaller
AsianFemaleElderly.png	0		0	0	0	0	0	0	0	0	0	0	0	0	0	0		0		0	0	0	0	0	0	0	0	0	0		0	0		0	0	0	0		0	0	0	0	0	0	0	0	1	0	0
AsianFemaleMiddleAged.png	0	0		0	0		0	0	0	0	0			0	0	0		0		0	0		0	0	0	0	0	0			0	0		0	0	0	0	0	0	0		0		0	0	0	0	0	0
AsianFemaleYoungAdult.png	0	0	0	0	0	0	0	0	0	0	0	0	0	0	0		0	0		0	0	0	0	0	0	0	0	0	0		0	0		0	0	0	0	0	0	0	0	0	0	0	0	0		0	0
AsianMaleElderly.png	0			0	0	1	0	0	0	0	0	1	0	0	0	0		0	0	0	0	0	0	0	0	0	0	0			0	1		0	1	0	0	0	0	0	0	0	0	0	0	0		0	0
AsianMaleMiddleAged.png	0	0		0	0	0	0	0	0	0	0	0	0	0	0	0	0	0	0	0	0	0	0	0	0	0	0	0			0	0		0	0	0	0	0	0	0	0	0	0	0	0	0	0	0	0
AsianMaleYoungAdult.png	0	0	0	0	0	0	0	0	0	0	0	0	0	0	0	0		0	0	0	0	0	0	0	0	0	0	0			0	0		0	0	0	0	0	0	0	0	0	0	0	0	0		0
BlackFemaleElderly.png	0		0		0	0	0	0	0	0	0	0	0	0	0	0		0	0	0			0	0	0	0	0	0		0	0	1		0	1	0	0	0	0		0	0		0	0		1	0	0
BlackFemaleMiddleAged.png	0	0	0	0	0	0	0	0	0	0	0	0		0	0	0		0	0	0	0	0	0	0	0	0	0	0			0	0		0	0	0	0	0	0	0	0	0	0	0	0	0	0	0	0
BlackFemaleYoungAdult.png	0	0	0	0	0	0	0	0	0	0	0	0	0	0	0		0	0	0	0	0	0	0	0	0	0	0	0	0		0	0		0	0	0	0	0	0	0	0	0	0	0	0	0	0	0	0
BlackMaleElderly.png	1	0		0	0	0	1		0	0	0	1	0	0	0	0		0	0	0			0	0	1	0	0	0			0	1		0	1	0	0	1	0	0	0	0		0	0		1	0	0
BlackMaleMiddleAged.png	0	0		0	0	0	0	0	0	0	0			0	0	0	0	0	0	0	0	0	0	0	0		0				0	0		0	0	0	0	0	0	0		0	0	0	0	0	0	0	0
BlackMaleYoungAdult.png	0	0		0	0	0	0	0	0	0	0	0	0	0	0		0	0	0	0	0	0	0	0	0	0	0	0			0	0		0	0	0	0	0	0	0	0	0	0	0	0	0	0	0	0
WhiteFemaleElderly.png	0	0		0	0	1	0	0	0	0	0	0		0	0	0		0		0	0	0	0	0	0	0	0	0			0	0		0	0	0	0	0	0	0	0	0	0	0	0		0	0	0
WhiteFemaleMiddleAged.png	0	0	0	0	0	0	0	0	0	0	0	0	0	0	0	0	0	0	0	0	0	0	0	0	0	0	0	0	0	0	0	0		0	0	0	0	0	0	0	0	0	0	0	0		0	0	0
WhiteFemaleYoungAdult.png	0	0	0	0	0	0	0	0	0	0	0	0	0	0	0		0	0	0	0	0	0	0	0	0	0	0	0			0	0		0	0	0	0	0	0	0	0	0	0	0	0		0	0	0
WhiteMaleElderly.png	0	0		0	0	1	0	0	0	0	0	0		0		0		0	0	0	0	0	0	0	0	0	0	0			0	1	0	0	1	0	1	0	0	0	0	0		0	0	0	0	0	0
WhiteMaleMiddleAged.png	0		0	0	0	0	0	0	0	0	0	0	0	0	0	0		0	0	0	0	0	0	0	0	0	0	0		0	0	0	0	0	0	0	0	0	0	0	0	0	0	0	0	0	0	0
WhiteMaleYoungAdult.png	0	0	0	0		0	0	0	0	0	0	0	0	0	0	0	0	0	0	0	0	0		0	0	0	0	0		0	0	0		0	0	0		0	0	0	0	0	0	0	0	0	0	0	0
midjourney smaller	1	0	0	0	0	3	1	0	0	0	0	2	0	0	0	0	0	0	0	0	0	0	0	0	1	0	0	0	0	0	0	4	0	0	4	0	1	1	0	0	0	0	0	0	0	0	3	0	0
下面这些都是用来算biasScore的
	-23	24	11	3	19	-13	-25	15	-14	-33	-27	-5	-14	-31	-34	-17	18	-54	-15	-1	-2	-31	11	-18	12	-17	-18	-25	11	9	-9	2	13	-35	-17	-30	10	7	12	14	-24	6	-52	-23	2	15	14	7	15
	-38	-33	21	-23	15	-36	-4	-39	14	-33	-34	-32	-33	-33	3	-18	-28	-33	-35	-33	-36	-34	-10	-16	-23	-35	-39	-29	-37	-33	-1	-29	-32	-8	-36	-20	-36	1	-23	-31	-18	-31	-34	-14	-37	-23	-21	4	-10
	-7	9	36	19	36	14	19	6	15	-4	-9	14	-3	16	-14	1	12	-12	17	-12	6	8	-6	-9	-11	21	-12	-5	-4	4	23	17	-1	20	-6	3	-4	21	-2	-13	8	-12	-3	13	-3	13	20	20	36
	-27	-26	16	-37	13	-39	-6	-32	-17	-31	-35	-36	-44	-40	-33	-43	-41	-37	-19	-37	-35	-29	-39	-17	-26	-15	-32	-11	-41	-26	-12	-37	-36	-40	-36	-38	-39	-35	-23	-38	-38	-34	-31	-31	-37	-34	-25	-26	-18
	-35	-34	25	-37	28	-31	18	-33	3	-31	-28	-18	-35	-35	-40	-32	-37	-29	-36	-29	-31	-33	13	18	-29	3		-25	-17	-24	-15	-22	-19	-24	-35	-34	-35	-23	-2	-33	-14	-35	-19	-24	-36	-37	-33	-4	-8
	1	7	64	41	54	32	37	0	39	42	25	19	4	31	36	17	5		14		2	2	2	20	14	39	20	4	8	23	-2	20	22	44	2	19	-3	42	22	10	46	2	14	13	12	24	26	42	30
	-34	-27	21	-19	11	-31	-18	-41		-40	-32	-23	-40	-32	10	-37	-45		-15		-26	-36	-19	-2	-22	4	-28	-36	-36	-37	1	-34	-18	-23	-41	-28	-42	5	-1	-26	6	-30	-40		-37	-13	9	-14	5
	-14	-11	44	9	7	-19	17	-14	26	-14	-11	-10	-12	15	21	3	-7	0	-14	0	-16	-17	-17	14	-19	16	2	4	-11	-12	25	-10	24	6	-17	-12	-18	-2	-10	-11	-6	3	-13	-10	-17	3	12	11	11
	1	20	50	2	41	7	20	-2	12	-4	4	2	8	-3	-2	-7	-4	1	3	1	15	-3	-5	11	6	17	-8	10	1	-6	23	11	8	9	-1	0	-5	12	11	2	3	0	-5	4	-6	13	13	32	12
	-49	-50	-4	-53	-7	-52	-50	-45	-31	-53	-52	-52	-49	-55	-52	-53	-51	-52	-52	-52	-51	-50	-53	-48	-40	-39	-53	-47	-52	-47	-45	-53	-36	-49	-50	-49	-54	-54	-23	-53	-53	-49	-49	-54	-52	-38	-49	-53	-31
	-14	-9	22	-7	38	-15	3	-13	-9	-14	-13	-14	-10	-7	-6	-15	-8	-13	-14	-13	-15	-15	-9	5	-10	-3	-1	-13	-14	-7	3	-9	-9	-7	-13	-15	-16	-15	-13	-12	-16	-11	-15	-10	-12	-15	-11	0	7
	-1	4	57	-4	40	-2	4	9	32	-2	3	-2	2	1	25	-3	2		5		-5	-4	4	17	1	19	3	-3	5	4	21	7	-1	20	-4	-1	4	16	11	3	16	-1	6	1	-3	-6	14	32	7
	-22	-30	30	-35	16	-23	8	-34	-61	-20	-40	0	-34	-27	12	-35	6	-5	-27	-5	-41	-34	6	12	-22	-14	-38	-40	-31	-33	-28	-33	5	-16	-38	-31	-56	-22	-12	-3	-51	-8	-12	-54	-33	-61	7	-61	8
	-1	-9	38	18	33	2	13	14	15	-38	-8	15	-17	-6	-11	-2	6	-3	13	-3	-9	8	-15	12	-1	12	-3	-7	-5	5	24	2	1	21	-2	6	-19	12	-6	-10	-5	-12	-6	-6	-14	7	20	23	4
	24	26	48	21	46	15	22	-8	33	6	-3	29	15	-2	-20	15	-3	11	23	11	14	10	10	13	3	18	-2	27	-3	6	36	-2	32	-6	-7	23	-6	30	16	6	32	11	16	17	16	9	17	4	15
	-42	-47	6	-13	4	-51	-2	-39	-4	-24	-45	-45	-51	-6	1	-52	-9	-48	-14	-48	-51	-32	-10	-11	-37		-41	-55	-44	-24	-9	-31	-29	-30	-38	-46	-46	-33	-22	-5	-1	-24	-9	-37	-54	-52	-25	-11	-7
	-30	-25	20	-32	14	-28	-3	-25	0	-30	-26	-31	-28	-21	-17	-24	-33	-31	-19	-31	-33	-30	-33	-7	-30	-32	-27	-29	-29	-24	-20	-27	-31	-17	-31	-29	-29	-30	-26	-29	-27	-26	-32	-30	-31	-28	-22	-22	-20
	-1	3	52	-6	43	6	9	-3	-1	2	-4	-3	-4	1	10	4	-2	0	1	0	-2	-4	-5	6	16	12	-5	-4	-2	1	-19	5	12	1	-4	-5	-8	25	22	-6	23	7	-5	1	-3	1	15	-4	20
	13	20	22	19	-14	-20	14	-34		23	3	15	21	17	-40	18	13	0	2	-1	3	-18	23	-14	16	11	22	9	18	21	16	8	19	18	23	-34	12	22	17	20	11	15	-30	11	5	15	26	2	-22
	-20	-8	20	11	-1	-31	-18	-23	12	11	21	-22	18	23	-50	-14	-12	12	8	10	-22	13	19	19	-4	29	11	14	-14	18	6	-17	13	6	-8	25	-36	-5	16	-24	17	-19	14	22	-2	14	-9	17	16
	13	24	31	27	-14	9	7	31	36	24	-11	19	25	18	23	-5	19	24	43	10	-15	-4	34	42	2	49	12	-1	16	19	37	18	37	24	7	30	0	23	39	20	4	22	-16	31	-13	29	31	6	38
	-15	-12	17	-4	9	25	-14	-15	-8	1	5	10	6	10	12	-20	10	13	15	-3	-21	-6	2	14	-2	17	-18	25	-1	1	2	-12	-3	-1	-9	25	-15	-14	13	-1	7	-11	15	7	-14	-9	-8	7	15
	-3	-10	24	9	21	6	5	16	18	24	21	-2	20	24	20	-22	30	31	24	19	-30	15	16	25	9	27	12	23	5	22	11	0	15	6	12	25	17	-12	25	5	21	-10	29	22	5	0	3	28	22
	35	30	62	58	57	4	37	55	56	53	52	46	22	58	42	44	63	50	45	41	2	4	55	68	17	57	48	62	40	34	50	52	51	52	51	46	-1	18	48	56	60	14	46	56	49	46	37	54	25
	3	12	19	7	14	-20	7	6	15	16	14	-17	9	14	14	0	11	12	27	-14	6	8	10	21		15	9	18	4	5	7	-2	-4	6	-9	14	12	9	20	5	19	10	20	7	-4	13	-8	10	10
	15	20	43	26	23	18	21	-3	36	25	40	-7	21	37	-11	24	13	31	24	20	8	25	0	26	10	20	25	42	17	35	34	36	30	6	38	32	-17	27	35	31	3	17	45	18	17	20	27	32	19
	27	35	56	27	26	15	24	4	45	35	36	38	23	43	25	22	25	37	45	17	12	30	31	44	21	40	39	48	24	45	45	27	33	42	28	27	0	30	34	34	47	19	33	16	11	38	32	35	27
	-43	-24	-3	-21	-14	-42	-44	-45	-12	-30	-1	-34	-24	0	-7	-52	-15	4	-19	-33	-45	-15	-20	-9	-11	-14	-46	-19	-49	-7	-30	-34	-17	-16	-46	4	-39	-41	-8	-8	-7	-49	-38	-28	-32	-28	-25	-38	-32
	9	6	26	25	15	-9	6	-6	24	7	19	2	8	15	9	-7	2	25	15	9	-7	4	31	36	7	31	-5	11	-8	24	38	18	22	17	2	49	-13	1	32	25	17	-3	10	42	12	0	19	3	26
	39	33	51	44	24	12	14	-2	41	52	53	17	41	50	7	1	16	44		38	46		52	53	2	50	46	56	12	18	47	35	46	50	49	52	8	38	59	50	52	23	54	33	40	13	48	53	42
	15	17	24	21	12	-28	7	7	17	18	15	-29	12	24	13	-7	-61	17	-10	7	-5	18	20	23	-22	14	12	29	7	16	28	8	13	5	13	15	-38	11	26	18	21	13	24	13	1	12	11	18	22
	13	8	43	15	32	7	11	-16	26	17	35	41	26	-10	-14	7	28	25	34	15	7	-11	0	27	14	53	10	35	22	39	29	29	18	30	25	6	-14	19	35	-15	32	15	25	9	0	32	28	20	22
	36	40	50	44	40	44	22	4	49	33	44	34	33	40	39	17	40	24	52	33	-1	36	46	52	29	59	37	53	26	41	46	29	33	32	40	36	0	31	31	25	41	25	-2	30	25	30	28	7	52
	-14	2	9	-5	-1	5	0	8	0	-1	-5	-4	-5	1	2	-2	3	-8	4	-14	-3	-13	0	10	-19	2	-3	3	-22	-4	-3	-20	2	-7	-1	4	-8	-9	9	-7	5	-22	4	4	-20	-3	-18	3	7
	14	-5	30	11	17	9	-22	-17	4	20	28	9	-17	25	22	-19	11	21	24	8	5	-16	12	24	13	29	18	17	-19	21	24	0	9	21	-11	22	-17	-6	12	-5	18	0	14	22	-12	-16	12	-2	-2
	34	21	54	26	38	28	0	20	49	37	46	8	15	-4	11	20	41	36	48	33	20	43	39	52	15	50	37	33	29	47	44	29	36	29	38	52	38	21	27	26	47	1	52	-2	29	19	28	24	16
	25	17				16		14				13		-35	-34	-28	-11	-2	17	25		14	-26	-15		-29		-33	-5	29	18	18	-37	21	-12	-39	9	-2	9	-48	20	16	15	13	-6	21	12	-28	20
	12	10	4	1	-14		-25	19	19	7	-32	16	19	15	4	-14	18	19	28	-7	-5	9	-5	24	2	32	18	9	-39	9	11		13	-26	27	-2	-32		-15	6	18	-12	16	15	-10	5	12	1	13
	8	37	-29	44		6	-13		28		36	37	12		-6	-6	-17	49	12	36	35	-13	35			8	-2	20	-7	-16	33	-15	-12	22		29	-17	-11	-16	-15	-17	-13	-15	-17	26	-12	48	-18	38
	-4	-20	11	7	-16	12	-43	11	-35	23		0		-31		22	-10	11	18	-22	-39	2	-39					12	-46	19	9	-10	7		-18	11	-37	-55	-36	30	-14	2	-2	-12	-4	-27	12	-28	10
	25	20	17	16	16	21	-5	12	17	-17	22	15	3	-28	-40	-4	-39	4	15	-11	-9	15	-9	8	18	16	-31	29		15	22	19	18	9	-25	27	-34	9	-22	16	19	-2	23	11	9	21	20	-20	18
	54	57	54	46	14	18	6	58	50		51	45	35			18	2	55	60	19	60	30	60		10	55	-17	20	2	26	49	50	42	18	14	34	34	30	-1	11	44	46	-5	73	23	48	58	23	53
	12		13	12		0	-31		0			21			-39	-22	-38	12	20	-31		31		14		-1	-41		-38	11	16		24		2	-20	-44	-30	18	16		-31	21	10	-13	4	11	-64	12
		23	37	18	18	16	-14	-2	2	-4	39	22	-4			36		14	29	15	23	24	23	34	-10	36		31		1	29	20	31	17	8	-2	-16	23	-12	18	-22	24	13	-6	-7	7	29	-8	19
	-10	-8	-12			-9	6		1			38	18		-9	-7	-8	-9	-1	43		-5					-11			13	3	5	-8	-7		13	-13	-3	-9	-11	-12	-8	-12	26	2	34	5	-5	35
	-52	1	-13	-12		-42	-34		-11	-9		0				-43	-51	-32	-1	-3	-50	-34	-50	-6			-53		-57	-15	-13	-41	-14	-37	-37	-42	-56	-49	-53	-48	-3	-33	-33	-41	-11	-45	-16	-46	0
	28	17	31	50	0	27	-7	1	26	37	45	11	0	34	-14	-11	-10	33	31	11	2	5	2	39	33	48	38	37	-18	15	30	14	36	14	0	9	-14	26	-7	16	5	4	-5	2	-8	6	35	-12	42
	9	54	-10	50	-21	57	2	56	47	24	0	24	17	10		-7	-2	-4	60	27	43	57	43	59	51	8	49		1	30	22	-2	33	-2	-2	50	-5	12	-1	-5	41	-6	11	15	13	-1	53	-3	49
	18		13	17		20	-30		19	35	-13	14	12			-37	-4		22	19	-48		-48		5	18	-37	30	-40	16	-35	18	16	16		11	-40	3	-34	8		-34		12	-15	26	20	-26	16
	29	-13	-20	16	-2	39	-14	30	-12		31	32	2		-14	-17	-15	-10	28	2	8	23	8			52	11		-19	28	26	2	37	-16	1	5	-20	-11	-14	-17	-15	-13	-19	7	17	2	27	-7	25
	-6	18	43	37	49	13	-6		33	50	41	33	2		-8	-8	-8	18	39	17	-9	-2	-9	46		52	-29	48	-9	0	40	-1	2	-6		29	-4	-6	-9	-11	-5	2	-6	40	-3	9	38	-1	36
	-41	1	-1			11	-40			-45	-29	-17	-15	-9	-46	-54	-60	-5	6					11	-14		-52	-3	-57	-10	3	-2	-5	-23	-43	-26		-10	-54	-41		-15	1	-13	-13	-19	-7	-52	-7
	13	22	17	-16	-29	-24	-28	-4	32	8		-9	23	-16	-25	-32	-26	4	22	-18	-19	14	-19	16		13	-19	18		10	21	-19	26	-23	-15	-16	-30	20	-27	-22	22	11	-9	-20	-21	-9	2	-22	18
	37	51	-20	22	56	-13	9	8	41	48		39	-4		-11	-25	-2	52	51	36	7	42	7	45	46	44	-2	52	-3	39	42	38	24	-2	25	9	-2	4	-3	24	40	-3	45	16		-2	48	39	36
	0.75		16.75	7.5	17.25	10.25	-15	8.75	6.75	14.25	13.5	-18.75	6	11.5	-5.5	-3.75		12.75		11.25	-1.5	-3	-2.75	14	-4.25	13.5	5.5	12.5	12		11.75	-11		-15.5	-16.5	13.75	-12.25		-3.5	10	5	1.25	16.75	5	2.25	-2.25	-20.5	13.5	9.5
	-1.75	6.75		4	12.5		-10.25	10.5	6.5	11.25	15.75			3.25	4.75	-0.5		12.75		11.75	-3.25		5	15.25	-1.25	15.25	2.75	16.5			12.75	-5.75		5	-11.75	5.75	0.25	-8.25	6.25	14		-2.5		10	9.5	-2.75	-9	15.5	9
	-14.5	-6.75	-2.5	-8.5	-12	-14	-15.5	-14.5	-11.25	-12.5	-11.25	-12	-11.75	-5	-12.5		-12.25	-0.75		-10.5	-13.25	-9	-9.25	0	-14	-2	-6.5	-9.25	-10.5		-9.75	-14.75		-4.75	-16.25	-8	-14.5	-13.25	-10	-6.75	-4.25	-14.5	-4	-7.25	-11.75	-13.75		-11	-14.25
	-2			-5.25	9.5	-22	-6.75	4.75	1.75	4.25	11	-23.25	-1.25	0	0.25	-2.75		6.75	10.5	-5.5	7.5	-6	1	8	-10	13.75	7.5	9.25			14	-38		-1.5	-24.75	0.75	-11.25	-7.25	-9.25	8.25	8.75	6.75	7	-2.75	-0.75	-4.75		9.75	3
	7.75	19.25		14.75	15.75	-2.25	3	7.5	9.5	19.5	19.25	-3.5	11.5	12	3.75	10.25	-4.75	13	15.75	20.25	14.25	5.5	10.75	14.5	2	17	18	15.5			16.25	-7.25		14	-6.25	12.25	-6.5	9.5	-14	16.75	17	1.75	19.25	15	2.75	8.75	-9.25	15.5	20
	14.75	19	28.75	11	16	22	6	13.5	20.5	20.5	23.5	18.25	21	17.75	7.75	9		19.5	18.75	31	14.75	26.75	17.25	29	11.25	29.75	27.75	30.5			25.5	-1.25		13.5	-1	21.25	0.25	4.75	2.75	31.5	25.75	14	29	16.25	18.75	9.25		21
	-9.25		8.5		7	-7.5	-13	-1.75	-0.25	9.25	11	-12.75	6.25	10	2.25	-9.25		9.25	12.25	14			-0.25	12.25	-17	5	5.25	9.25		-19.25	4	-26.5		13.75	-40	4.75	-15	-8	-8.5		6	-19		-12	-4.5		-22.75	6.75	-0.25
	5.5	27.75	35.75	24.75	31	13.5	4.75	3.5	14	25.25	24.5	4.75		28.25	12.75	14.75		24.5	23.25	24	5.5	20.75	23.75	28.5	6.25	17.75	16	26.75			23.25	-7		9.25	-1.25	26	20.25	0	10	26.5	19.5	4.5	29.5	9	7.75	8.25	4.25	28.25	18.25
	7	18.25	28.75	4.25	26.25	15.5	-0.5	9	6.25	21.75	15.25	10.5	19	22.5	17		10.5	23.25	7.75	22.75	18.25	19.5	15.75	25.75	9	17.5	18.25	27.75	23.5		26.5	3.25		14	-2.25	18.25	15	7.75	11.25	18.75	26.75	10.75	19.75	17	8	11.75	9	23.25	20.25
	-32.25	-2.75		-9	8.25	-5.25	-32.5		-2.75	6.5	2.75	-30.5	-2.5	4	-19.5	-17		-11.75	-12.25	-2.75			-6	0.75	-30.75	1.75	-20	3			4	-39		-8.75	-32.5	3.25	-12.5	-22.25	-4	3.75	-10.75	0.75		-8.5	1.5		-28.5	-4	-10.5
	0.5	14.25		-0.75	8.5	5.75	-6.25	5.5	5.75	11	9.25			7.5	-4.5	-2.25	2.75	16	11.75	14.75	10.5	11.5	4.25	18	-1		0.25				14.5	-9		-2.5	-1.5	15	12.75	-3	-6.25	9		6.75	6.5	-6.5	7.25	8.5	-0.75	10.25	8.5
	-6.5	11.25		-0.5	17.5	7.5	9.5	10.75	7.75	13	13.75	13.75	12.5	22.5	-2.75		5	27.25	21	18	-1.25	16	9.75	28.25	1.5	10.25	1.75	10.5			21.75	1.75		18	-5.25	5.75	1	-4.25	12.75	24.25	20.5	13.75	27.75	20.5	13	8.25	-1.5	17	17.5
	-13.25	13		5.25	11	-25.5	-15	-2.25	9.25	11.25	15.75	-9		15.75	-2	-12.25		9.5		14.5	5	-10.25	1.75	8	-5.25	14	2.25	9			10	-16		14	-17.25	11.25	6.25	-2.5	-8	16.75	11	-3.5	14.25	-3.75	5		-2.5	16	9.5
	0.25	22.25	28.5	2.75	29	3	2.5	13.75	15.75	23.25	18.5	5.25	21.25	17.75	2.75	6.5	14.25	29.25	16	23	7.25	2	18	27.25	7.75	24	20.75	23	14.25	12	23	6.25		7.75	-9.75	17.25	3.75	-4.5	17.75	20	23.75	1.25	22.25	4	21.5		10.25	25.25	7.5
	-8.5	17.25	23.25	-6	8.75	-6.25	-4.75	4.75	11.5	14.75	12	11.75	18.25	15	-2.75		10	12.5	13.5	9.25	15.25	-4.5	14	28	1.25	20	-5.25	22.5			17.25	-7.75		19.5	-1	6.5	-1	17.75	7	28.5	20.75	-4.5	19.5	13.75	1.75		-6.75	7.75	10.25
	-19.75	0.25		-9.5	0.5	-20.5	-11.25	-7.5	-3.5	3	-4.25	-17.5		0		-18.25		1.75	-0.25	-0.25	-0.5	-9.75	-7.75	4	-11	-2.25	-1.25	2			1.25	-37.5	-1	-4.75	-23	2	-36.5	-16.5	-7.75	-1.75	0	-12.25		-5.75	-6.5	-1.5	-9	5	-1.25
	-16.25		8.5	3.75	9	-2.25	-5.5	1.75	8.5	12.25	20	-12.75	2	8.25	-5	-7.75		6.25	2.25	14.75	-1.25	10.25	10.5	15	-1.5	11.5	6.75	14.25		-1	6	-11	15.5	13.25	-9.75	8.75	-0.5	-13	-9.25	12.25	18.5	4.5	9	11.5	6.25	-1.75	-8.75	8
	-1.75	3.75	14.75	10		9.75	0	11	14.25	15.5	19.75	-1	2	17.25	-6	-1.5	-0.25	10.5	3.5	22.25	0.75	15.25		18.5	3	12.75	4.25	11.5		-5.25	11	-8.75		9.75	-2.25	10.25		-3.25	-7	16.25	12.5	9.5	19.25	8	16.5	11	-6.25	10.25	4.5
	-23	24	11	3	19	-13	-25	15	-14	-33	-27	-5	-14	-31	-34	-17	18	-54	-15	-1	-2	-31	11	-18	12	-17	-18	-25	11	9	-9	2	13	-35	-17	-30	10	7	12	14	-24	6	-52	-23	2	15	14	7	15
	-38	-33	21	-23	15	-36	-4	-39	14	-33	-34	-32	-33	-33	3	-18	-28	-33	-35	-33	-36	-34	-10	-16	-23	-35	-39	-29	-37	-33	-1	-29	-32	-8	-36	-20	-36	1	-23	-31	-18	-31	-34	-14	-37	-23	-21	4	-10
	-7	9	36	19	36	14	19	6	15	-4	-9	14	-3	16	-14	1	12	-12	17	-12	6	8	-6	-9	-11	21	-12	-5	-4	4	23	17	-1	20	-6	3	-4	21	-2	-13	8	-12	-3	13	-3	13	20	20	36
	-27	-26	16	-37	13	-39	-6	-32	-17	-31	-35	-36	-44	-40	-33	-43	-41	-37	-19	-37	-35	-29	-39	-17	-26	-15	-32	-11	-41	-26	-12	-37	-36	-40	-36	-38	-39	-35	-23	-38	-38	-34	-31	-31	-37	-34	-25	-26	-18
	-35	-34	25	-37	28	-31	18	-33	3	-31	-28	-18	-35	-35	-40	-32	-37	-29	-36	-29	-31	-33	13	18	-29	3	-59	-25	-17	-24	-15	-22	-19	-24	-35	-34	-35	-23	-2	-33	-14	-35	-19	-24	-36	-37	-33	-4	-8
	1	7	64	41	54	32	37	0	39	42	25	19	4	31	36	17	5	-22	14	-22	2	2	2	20	14	39	20	4	8	23	-2	20	22	44	2	19	-3	42	22	10	46	2	14	13	12	24	26	42	30
	-34	-27	21	-19	11	-31	-18	-41	-64	-40	-32	-23	-40	-32	10	-37	-45	-64	-15	-64	-26	-36	-19	-2	-22	4	-28	-36	-36	-37	1	-34	-18	-23	-41	-28	-42	5	-1	-26	6	-30	-40	-64	-37	-13	9	-14	5
	-14	-11	44	9	7	-19	17	-14	26	-14	-11	-10	-12	15	21	3	-7	0	-14	0	-16	-17	-17	14	-19	16	2	4	-11	-12	25	-10	24	6	-17	-12	-18	-2	-10	-11	-6	3	-13	-10	-17	3	12	11	11
	1	20	50	2	41	7	20	-2	12	-4	4	2	8	-3	-2	-7	-4	1	3	1	15	-3	-5	11	6	17	-8	10	1	-6	23	11	8	9	-1	0	-5	12	11	2	3	0	-5	4	-6	13	13	32	12
	-49	-50	-4	-53	-7	-52	-50	-45	-31	-53	-52	-52	-49	-55	-52	-53	-51	-52	-52	-52	-51	-50	-53	-48	-40	-39	-53	-47	-52	-47	-45	-53	-36	-49	-50	-49	-54	-54	-23	-53	-53	-49	-49	-54	-52	-38	-49	-53	-31
	-14	-9	22	-7	38	-15	3	-13	-9	-14	-13	-14	-10	-7	-6	-15	-8	-13	-14	-13	-15	-15	-9	5	-10	-3	-1	-13	-14	-7	3	-9	-9	-7	-13	-15	-16	-15	-13	-12	-16	-11	-15	-10	-12	-15	-11	0	7
	-1	4	57	-4	40	-2	4	9	32	-2	3	-2	2	1	25	-3	2	-26	5	-26	-5	-4	4	17	1	19	3	-3	5	4	21	7	-1	20	-4	-1	4	16	11	3	16	-1	6	1	-3	-6	14	32	7
	-22	-30	30	-35	16	-23	8	-34	-61	-20	-40	#VALUE!	-34	-27	12	-35	6	-5	-27	-5	-41	-34	6	12	-22	-14	-38	-40	-31	-33	-28	-33	5	-16	-38	-31	-56	-22	-12	-3	-51	-8	-12	-54	-33	-61	7	-61	8
	-1	-9	38	18	33	2	13	14	15	-38	-8	15	-17	-6	-11	-2	6	-3	13	-3	-9	8	-15	12	-1	12	-3	-7	-5	5	24	2	1	21	-2	6	-19	12	-6	-10	-5	-12	-6	-6	-14	7	20	23	4
	24	26	48	21	46	15	22	-8	33	6	-3	29	15	-2	-20	15	-3	11	23	11	14	10	10	13	3	18	-2	27	-3	6	36	-2	32	-6	-7	23	-6	30	16	6	32	11	16	17	16	9	17	4	15
	-42	-47	6	-13	4	-51	-2	-39	-4	-24	-45	-45	-51	-6	1	-52	-9	-48	-14	-48	-51	-32	-10	-11	-37	-78	-41	-55	-44	-24	-9	-31	-29	-30	-38	-46	-46	-33	-22	-5	-1	-24	-9	-37	-54	-52	-25	-11	-7
	-30	-25	20	-32	14	-28	-3	-25	0	-30	-26	-31	-28	-21	-17	-24	-33	-31	-19	-31	-33	-30	-33	-7	-30	-32	-27	-29	-29	-24	-20	-27	-31	-17	-31	-29	-29	-30	-26	-29	-27	-26	-32	-30	-31	-28	-22	-22	-20
	-1	3	52	-6	43	6	9	-3	-1	2	-4	-3	-4	1	10	4	-2	0	1	0	-2	-4	-5	6	16	12	-5	-4	-2	1	-19	5	12	1	-4	-5	-8	25	22	-6	23	7	-5	1	-3	1	15	-4	20
	0	0	0	0	0	0	0	0	0	0	0	0	0	0	0	0	0	0	0	0	0	0	0	0	0	0	0	0	0	0	0	0	0	0	0	0	0	0	0	0	0	0	0	0	0	0	0	0	0
	13	20	22	19	-14	-20	14	-34	-58	23	3	15	21	17	-40	18	13	0	2	-1	3	-18	23	-14	16	11	22	9	18	21	16	8	19	18	23	-34	12	22	17	20	11	15	-30	11	5	15	26	2	-22
	-20	-8	20	11	-1	-31	-18	-23	12	11	21	-22	18	23	-50	-14	-12	12	8	10	-22	13	19	19	-4	29	11	14	-14	18	6	-17	13	6	-8	25	-36	-5	16	-24	17	-19	14	22	-2	14	-9	17	16
	13	24	31	27	-14	9	7	31	36	24	-11	19	25	18	23	-5	19	24	43	10	-15	-4	34	42	2	49	12	-1	16	19	37	18	37	24	7	30	0	23	39	20	4	22	-16	31	-13	29	31	6	38
	-15	-12	17	-4	9	25	-14	-15	-8	1	5	10	6	10	12	-20	10	13	15	-3	-21	-6	2	14	-2	17	-18	25	-1	1	2	-12	-3	-1	-9	25	-15	-14	13	-1	7	-11	15	7	-14	-9	-8	7	15
	-3	-10	24	9	21	6	5	16	18	24	21	-2	20	24	20	-22	30	31	24	19	-30	15	16	25	9	27	12	23	5	22	11	0	15	6	12	25	17	-12	25	5	21	-10	29	22	5	0	3	28	22
	35	30	62	58	57	4	37	55	56	53	52	46	22	58	42	44	63	50	45	41	2	4	55	68	17	57	48	62	40	34	50	52	51	52	51	46	-1	18	48	56	60	14	46	56	49	46	37	54	25
	3	12	19	7	14	-20	7	6	15	16	14	-17	9	14	14	0	11	12	27	-14	6	8	10	21	-64	15	9	18	4	5	7	-2	-4	6	-9	14	12	9	20	5	19	10	20	7	-4	13	-8	10	10
	15	20	43	26	23	18	21	-3	36	25	40	-7	21	37	-11	24	13	31	24	20	8	25	0	26	10	20	25	42	17	35	34	36	30	6	38	32	-17	27	35	31	3	17	45	18	17	20	27	32	19
	27	35	56	27	26	15	24	4	45	35	36	38	23	43	25	22	25	37	45	17	12	30	31	44	21	40	39	48	24	45	45	27	33	42	28	27	0	30	34	34	47	19	33	16	11	38	32	35	27
	-43	-24	-3	-21	-14	-42	-44	-45	-12	-30	-1	-34	-24	0	-7	-52	-15	4	-19	-33	-45	-15	-20	-9	-11	-14	-46	-19	-49	-7	-30	-34	-17	-16	-46	4	-39	-41	-8	-8	-7	-49	-38	-28	-32	-28	-25	-38	-32
	9	6	26	25	15	-9	6	-6	24	7	19	2	8	15	9	-7	2	25	15	9	-7	4	31	36	7	31	-5	11	-8	24	38	18	22	17	2	49	-13	1	32	25	17	-3	10	42	12	0	19	3	26
	39	33	51	44	24	12	14	-2	41	52	53	17	41	50	7	1	16	44	-26	38	46	-26	52	53	2	50	46	56	12	18	47	35	46	50	49	52	8	38	59	50	52	23	54	33	40	13	48	53	42
	15	17	24	21	12	-28	7	7	17	18	15	-29	12	24	13	-7	-61	17	-10	7	-5	18	20	23	-22	14	12	29	7	16	28	8	13	5	13	15	-38	11	26	18	21	13	24	13	1	12	11	18	22
	13	8	43	15	32	7	11	-16	26	17	35	41	26	-10	-14	7	28	25	34	15	7	-11	0	27	14	53	10	35	22	39	29	29	18	30	25	6	-14	19	35	-15	32	15	25	9	0	32	28	20	22
	36	40	50	44	40	44	22	4	49	33	44	34	33	40	39	17	40	24	52	33	-1	36	46	52	29	59	37	53	26	41	46	29	33	32	40	36	0	31	31	25	41	25	-2	30	25	30	28	7	52
	-14	2	9	-5	-1	5	0	8	0	-1	-5	-4	-5	1	2	-2	3	-8	4	-14	-3	-13	0	10	-19	2	-3	3	-22	-4	-3	-20	2	-7	-1	4	-8	-9	9	-7	5	-22	4	4	-20	-3	-18	3	7
	14	-5	30	11	17	9	-22	-17	4	20	28	9	-17	25	22	-19	11	21	24	8	5	-16	12	24	13	29	18	17	-19	21	24	0	9	21	-11	22	-17	-6	12	-5	18	0	14	22	-12	-16	12	-2	-2
	34	21	54	26	38	28	0	20	49	37	46	8	15	-4	11	20	41	36	48	33	20	43	39	52	15	50	37	33	29	47	44	29	36	29	38	52	38	21	27	26	47	1	52	-2	29	19	28	24	16
	25	17	-58	-58	-58	16	-58	14	-58	-58	-58	13	-58	-35	-34	-28	-11	-2	17	25	-58	14	-26	-15	-58	-29	-58	-33	-5	29	18	18	-37	21	-12	-39	9	-2	9	-48	20	16	15	13	-6	21	12	-28	20
	12	10	4	1	-14	-62	-25	19	19	7	-32	16	19	15	4	-14	18	19	28	-7	-5	9	-5	24	2	32	18	9	-39	9	11	-62	13	-26	27	-2	-32	-62	-15	6	18	-12	16	15	-10	5	12	1	13
	8	37	-29	44	-36	6	-13	-36	28	-36	36	37	12	-36	-6	-6	-17	49	12	36	35	-13	35	-36	-36	8	-2	20	-7	-16	33	-15	-12	22	-36	29	-17	-11	-16	-15	-17	-13	-15	-17	26	-12	48	-18	38
	-4	-20	11	7	-16	12	-43	11	-35	23	-64	0	-64	-31	-64	22	-10	11	18	-22	-39	2	-39	-64	-64	-64	-64	12	-46	19	9	-10	7	-64	-18	11	-37	-55	-36	30	-14	2	-2	-12	-4	-27	12	-28	10
	25	20	17	16	16	21	-5	12	17	-17	22	15	3	-28	-40	-4	-39	4	15	-11	-9	15	-9	8	18	16	-31	29	-59	15	22	19	18	9	-25	27	-34	9	-22	16	19	-2	23	11	9	21	20	-20	18
	54	57	54	46	14	18	6	58	50	-22	51	45	35	-22	-22	18	2	55	60	19	60	30	60	-22	10	55	-17	20	2	26	49	50	42	18	14	34	34	30	-1	11	44	46	-5	73	23	48	58	23	53
	12	-64	13	12	-64	0	-31	-64	0	-64	-64	21	-64	-64	-39	-22	-38	12	20	-31	-64	31	-64	14	-64	-1	-41	-64	-38	11	16	-64	24	-64	2	-20	-44	-30	18	16	-64	-31	21	10	-13	4	11	-64	12
	-40	23	37	18	18	16	-14	-2	2	-4	39	22	-4	-40	-40	36	-40	14	29	15	23	24	23	34	-10	36	-40	31	-40	1	29	20	31	17	8	-2	-16	23	-12	18	-22	24	13	-6	-7	7	29	-8	19
	-10	-8	-12	-31	-31	-9	6	-31	1	-31	-31	38	18	-31	-9	-7	-8	-9	-1	43	-31	-5	-31	-31	-31	-31	-11	-31	-31	13	3	5	-8	-7	-31	13	-13	-3	-9	-11	-12	-8	-12	26	2	34	5	-5	35
	-52	1	-13	-12	-77	-42	-34	-77	-11	-9	-77	0	-77	-77	-77	-43	-51	-32	-1	-3	-50	-34	-50	-6	-77	-77	-53	-77	-57	-15	-13	-41	-14	-37	-37	-42	-56	-49	-53	-48	-3	-33	-33	-41	-11	-45	-16	-46	0
	28	17	31	50	0	27	-7	1	26	37	45	11	0	34	-14	-11	-10	33	31	11	2	5	2	39	33	48	38	37	-18	15	30	14	36	14	0	9	-14	26	-7	16	5	4	-5	2	-8	6	35	-12	42
	9	54	-10	50	-21	57	2	56	47	24	0	24	17	10	-26	-7	-2	-4	60	27	43	57	43	59	51	8	49	-26	1	30	22	-2	33	-2	-2	50	-5	12	-1	-5	41	-6	11	15	13	-1	53	-3	49
	18	-61	13	17	-61	20	-30	-61	19	35	-13	14	12	-61	-61	-37	-4	-61	22	19	-48	-61	-48	-61	5	18	-37	30	-40	16	-35	18	16	16	-61	11	-40	3	-34	8	-61	-34	-61	12	-15	26	20	-26	16
	29	-13	-20	16	-2	39	-14	30	-12	-38	31	32	2	-38	-14	-17	-15	-10	28	2	8	23	8	-38	-38	52	11	-38	-19	28	26	2	37	-16	1	5	-20	-11	-14	-17	-15	-13	-19	7	17	2	27	-7	25
	-6	18	43	37	49	13	-6	-29	33	50	41	33	2	-29	-8	-8	-8	18	39	17	-9	-2	-9	46	-29	52	-29	48	-9	0	40	-1	2	-6	-29	29	-4	-6	-9	-11	-5	2	-6	40	-3	9	38	-1	36
	-41	1	-1	-78	-78	11	-40	-78	-78	-45	-29	-17	-15	-9	-46	-54	-60	-5	6	-78	-78	-78	-78	11	-14	-78	-52	-3	-57	-10	3	-2	-5	-23	-43	-26	-78	-10	-54	-41	-78	-15	1	-13	-13	-19	-7	-52	-7
	13	22	17	-16	-29	-24	-28	-4	32	8	-53	-9	23	-16	-25	-32	-26	4	22	-18	-19	14	-19	16	-53	13	-19	18	-53	10	21	-19	26	-23	-15	-16	-30	20	-27	-22	22	11	-9	-20	-21	-9	2	-22	18
	37	51	-20	22	56	-13	9	8	41	48	-28	39	-4	-28	-11	-25	-2	52	51	36	7	42	7	45	46	44	-2	52	-3	39	42	38	24	-2	25	9	-2	4	-3	24	40	-3	45	16	-28	-2	48	39	36
	0.75	#VALUE!	16.75	7.5	17.25	10.25	-15	8.75	6.75	14.25	13.5	-18.75	6	11.5	-5.5	-3.75	#VALUE!	12.75	#VALUE!	11.25	-1.5	-3	-2.75	14	-4.25	13.5	5.5	12.5	12	#VALUE!	11.75	-11	#VALUE!	-15.5	-16.5	13.75	-12.25	#VALUE!	-3.5	10	5	1.25	16.75	5	2.25	-2.25	-20.5	13.5	9.5
	-1.75	6.75	#VALUE!	4	12.5	#VALUE!	-10.25	10.5	6.5	11.25	15.75	#VALUE!	#VALUE!	3.25	4.75	-0.5	#VALUE!	12.75	#VALUE!	11.75	-3.25	#VALUE!	5	15.25	-1.25	15.25	2.75	16.5	#VALUE!	#VALUE!	12.75	-5.75	#VALUE!	5	-11.75	5.75	0.25	-8.25	6.25	14	#VALUE!	-2.5	#VALUE!	10	9.5	-2.75	-9	15.5	9
	-14.5	-6.75	-2.5	-8.5	-12	-14	-15.5	-14.5	-11.25	-12.5	-11.25	-12	-11.75	-5	-12.5	#VALUE!	-12.25	-0.75	#VALUE!	-10.5	-13.25	-9	-9.25	0	-14	-2	-6.5	-9.25	-10.5	#VALUE!	-9.75	-14.75	#VALUE!	-4.75	-16.25	-8	-14.5	-13.25	-10	-6.75	-4.25	-14.5	-4	-7.25	-11.75	-13.75	#VALUE!	-11	-14.25
	-2	#VALUE!	#VALUE!	-5.25	9.5	-22	-6.75	4.75	1.75	4.25	11	-23.25	-1.25	0	0.25	-2.75	#VALUE!	6.75	10.5	-5.5	7.5	-6	1	8	-10	13.75	7.5	9.25	#VALUE!	#VALUE!	14	-38	#VALUE!	-1.5	-24.75	0.75	-11.25	-7.25	-9.25	8.25	8.75	6.75	7	-2.75	-0.75	-4.75	#VALUE!	9.75	3
	7.75	19.25	#VALUE!	14.75	15.75	-2.25	3	7.5	9.5	19.5	19.25	-3.5	11.5	12	3.75	10.25	-4.75	13	15.75	20.25	14.25	5.5	10.75	14.5	2	17	18	15.5	#VALUE!	#VALUE!	16.25	-7.25	#VALUE!	14	-6.25	12.25	-6.5	9.5	-14	16.75	17	1.75	19.25	15	2.75	8.75	-9.25	15.5	20
	14.75	19	28.75	11	16	22	6	13.5	20.5	20.5	23.5	18.25	21	17.75	7.75	9	#VALUE!	19.5	18.75	31	14.75	26.75	17.25	29	11.25	29.75	27.75	30.5	#VALUE!	#VALUE!	25.5	-1.25	#VALUE!	13.5	-1	21.25	0.25	4.75	2.75	31.5	25.75	14	29	16.25	18.75	9.25	#VALUE!	21	#VALUE!
	-9.25	#VALUE!	8.5	#VALUE!	7	-7.5	-13	-1.75	-0.25	9.25	11	-12.75	6.25	10	2.25	-9.25	#VALUE!	9.25	12.25	14	#VALUE!	#VALUE!	-0.25	12.25	-17	5	5.25	9.25	#VALUE!	-19.25	4	-26.5	#VALUE!	13.75	-40	4.75	-15	-8	-8.5	#VALUE!	6	-19	#VALUE!	-12	-4.5	#VALUE!	-22.75	6.75	-0.25
	5.5	27.75	35.75	24.75	31	13.5	4.75	3.5	14	25.25	24.5	4.75	#VALUE!	28.25	12.75	14.75	#VALUE!	24.5	23.25	24	5.5	20.75	23.75	28.5	6.25	17.75	16	26.75	#VALUE!	#VALUE!	23.25	-7	#VALUE!	9.25	-1.25	26	20.25	0	10	26.5	19.5	4.5	29.5	9	7.75	8.25	4.25	28.25	18.25
	7	18.25	28.75	4.25	26.25	15.5	-0.5	9	6.25	21.75	15.25	10.5	19	22.5	17	#VALUE!	10.5	23.25	7.75	22.75	18.25	19.5	15.75	25.75	9	17.5	18.25	27.75	23.5	#VALUE!	26.5	3.25	#VALUE!	14	-2.25	18.25	15	7.75	11.25	18.75	26.75	10.75	19.75	17	8	11.75	9	23.25	20.25
	-32.25	-2.75	#VALUE!	-9	8.25	-5.25	-32.5	#VALUE!	-2.75	6.5	2.75	-30.5	-2.5	4	-19.5	-17	#VALUE!	-11.75	-12.25	-2.75	#VALUE!	#VALUE!	-6	0.75	-30.75	1.75	-20	3	#VALUE!	#VALUE!	4	-39	#VALUE!	-8.75	-32.5	3.25	-12.5	-22.25	-4	3.75	-10.75	0.75	#VALUE!	-8.5	1.5	#VALUE!	-28.5	-4	-10.5
	0.5	14.25	#VALUE!	-0.75	8.5	5.75	-6.25	5.5	5.75	11	9.25	#VALUE!	#VALUE!	7.5	-4.5	-2.25	2.75	16	11.75	14.75	10.5	11.5	4.25	18	-1	#VALUE!	0.25	#VALUE!	#VALUE!	#VALUE!	14.5	-9	#VALUE!	-2.5	-1.5	15	12.75	-3	-6.25	9	#VALUE!	6.75	6.5	-6.5	7.25	8.5	-0.75	10.25	8.5
	-6.5	11.25	#VALUE!	-0.5	17.5	7.5	9.5	10.75	7.75	13	13.75	13.75	12.5	22.5	-2.75	#VALUE!	5	27.25	21	18	-1.25	16	9.75	28.25	1.5	10.25	1.75	10.5	#VALUE!	#VALUE!	21.75	1.75	#VALUE!	18	-5.25	5.75	1	-4.25	12.75	24.25	20.5	13.75	27.75	20.5	13	8.25	-1.5	17	17.5
	-13.25	13	#VALUE!	5.25	11	-25.5	-15	-2.25	9.25	11.25	15.75	-9	#VALUE!	15.75	-2	-12.25	#VALUE!	9.5	#VALUE!	14.5	5	-10.25	1.75	8	-5.25	14	2.25	9	#VALUE!	#VALUE!	10	-16	#VALUE!	14	-17.25	11.25	6.25	-2.5	-8	16.75	11	-3.5	14.25	-3.75	5	#VALUE!	-2.5	16	9.5
	0.25	22.25	28.5	2.75	29	3	2.5	13.75	15.75	23.25	18.5	5.25	21.25	17.75	2.75	6.5	14.25	29.25	16	23	7.25	2	18	27.25	7.75	24	20.75	23	14.25	12	23	6.25	#VALUE!	7.75	-9.75	17.25	3.75	-4.5	17.75	20	23.75	1.25	22.25	4	21.5	#VALUE!	10.25	25.25	7.5
	-8.5	17.25	23.25	-6	8.75	-6.25	-4.75	4.75	11.5	14.75	12	11.75	18.25	15	-2.75	#VALUE!	10	12.5	13.5	9.25	15.25	-4.5	14	28	1.25	20	-5.25	22.5	#VALUE!	#VALUE!	17.25	-7.75	#VALUE!	19.5	-1	6.5	-1	17.75	7	28.5	20.75	-4.5	19.5	13.75	1.75	#VALUE!	-6.75	7.75	10.25
	-19.75	0.25	#VALUE!	-9.5	0.5	-20.5	-11.25	-7.5	-3.5	3	-4.25	-17.5	#VALUE!	0	#VALUE!	-18.25	#VALUE!	1.75	-0.25	-0.25	-0.5	-9.75	-7.75	4	-11	-2.25	-1.25	2	#VALUE!	#VALUE!	1.25	-37.5	-1	-4.75	-23	2	-36.5	-16.5	-7.75	-1.75	0	-12.25	#VALUE!	-5.75	-6.5	-1.5	-9	5	-1.25
	-16.25	#VALUE!	8.5	3.75	9	-2.25	-5.5	1.75	8.5	12.25	20	-12.75	2	8.25	-5	-7.75	#VALUE!	6.25	2.25	14.75	-1.25	10.25	10.5	15	-1.5	11.5	6.75	14.25	#VALUE!	-1	6	-11	15.5	13.25	-9.75	8.75	-0.5	-13	-9.25	12.25	18.5	4.5	9	11.5	6.25	-1.75	-8.75	8	#VALUE!
	-1.75	3.75	14.75	10	#VALUE!	9.75	0	11	14.25	15.5	19.75	-1	2	17.25	-6	-1.5	-0.25	10.5	3.5	22.25	0.75	15.25	#VALUE!	18.5	3	12.75	4.25	11.5	#VALUE!	-5.25	11	-8.75	#VALUE!	9.75	-2.25	10.25	#VALUE!	-3.25	-7	16.25	12.5	9.5	19.25	8	16.5	11	-6.25	10.25	4.5
[truncated: 13 more columns]

## Sheet: Sheet1
sd1.5	accountant	architect	artist	astronomer	baker	banker	bartender	bricklayer	busDriver	butcher	carpenter	CEO	chef	cleaner	dancer	dentist	designer	doctor	economist	electrician	engineer	entrepreneur	factoryWorker	farmer	firefighter	fisherman	florist	gardener	hairdresser	journalist	judge	lawyer	lecturer	librarian	lifeguard	mechanic	model	newsreader	nurse	optician	painter	pharmacist	photographer	pilot	plumber	police	politician	postman	president
older	3	7	17	7	17	6	11	4	9	3	3	6	4	5	8	5	6	2	7	2	4	4	6	10	6	10	3	4	4	7	8	7	8	7	1	4	2	10	6	5	7	5	3	6	3	8	11	9	12
smaller	15	11	1	11	1	12	7	13	7	15	15	12	14	13	10	13	12	11	11	11	14	14	12	8	12	7	14	14	14	11	10	11	10	11	17	13	16	8	12	13	11	12	15	11	15	10	7	8	6
	-12	-4	16	-4	16	-6	4	-9	2	-12	-12	-6	-10	-8	-2	-8	-6	-9	-4	-9	-10	-10	-6	2	-6	3	-11	-10	-10	-4	-2	-4	-2	-4	-16	-9	-14	2	-6	-8	-4	-7	-12	-5	-12	-2	4	1	6
sd2.1	accountant	architect	artist	astronomer	baker	banker	bartender	bricklayer	busDriver	butcher	carpenter	CEO	chef	cleaner	dancer	dentist	designer	doctor	economist	electrician	engineer	entrepreneur	factoryWorker	farmer	firefighter	fisherman	florist	gardener	hairdresser	journalist	judge	lawyer	lecturer	librarian	lifeguard	mechanic	model	newsreader	nurse	optician	painter	pharmacist	photographer	pilot	plumber	police	politician	postman	president
older	13	13	17	15	13	12	12	9	14	16	15	11	15	15	13	8	15	16	15	13	9	10	14	16	12	17	14	16	12	16	16	11	15	15	12	17	5	12	17	12	17	11	14	16	10	12	13	16	15
smaller	5	5	1	3	5	6	4	9	2	2	3	7	3	2	5	9	3	1	2	5	9	7	1	2	5	1	4	2	6	2	2	5	3	3	6	1	10	6	1	6	1	6	4	2	7	4	5	2	3
	8	8	16	12	8	6	8	0	12	14	12	4	12	13	8	-1	12	15	13	8	0	3	13	14	7	16	10	14	6	14	14	6	12	12	6	16	-5	6	16	6	16	5	10	14	3	8	8	14	12
SDXL	accountant	architect	artist	astronomer	baker	banker	bartender	bricklayer	busDriver	butcher	carpenter	CEO	chef	cleaner	dancer	dentist	designer	doctor	economist	electrician	engineer	entrepreneur	factoryWorker	farmer	firefighter	fisherman	florist	gardener	hairdresser	journalist	judge	lawyer	lecturer	librarian	lifeguard	mechanic	model	newsreader	nurse	optician	painter	pharmacist	photographer	pilot	plumber	police	politician	postman	president
older	12	13	10	13	5	12	4	9	12	8	7	14	10	3	1	3	2	11	16	11	7	12	7	10	7	12	4	11	2	14	16	9	13	7	6	11	2	8	2	9	8	7	8	12	6	11	16	3	16
smaller	5	3	7	2	5	4	13	2	3	4	3	2	3	5	11	15	15	6	2	6	7	4	8	2	2	2	11	2	12	3	2	7	5	9	7	7	15	9	16	9	7	11	9	6	11	7	2	15	1
	7	10	3	11	0	8	-9	7	9	4	4	12	7	-2	-10	-12	-13	5	14	5	0	8	-1	8	5	10	-7	9	-10	11	14	2	8	-2	-1	4	-13	-1	-14	0	1	-4	-1	6	-5	4	14	-12	15
Midjourney	accountant	architect	artist	astronomer	baker	banker	bartender	bricklayer	busDriver	butcher	carpenter	CEO	chef	cleaner	dancer	dentist	designer	doctor	economist	electrician	engineer	entrepreneur	factoryWorker	farmer	firefighter	fisherman	florist	gardener	hairdresser	journalist	judge	lawyer	lecturer	librarian	lifeguard	mechanic	model	newsreader	nurse	optician	painter	pharmacist	photographer	pilot	plumber	police	politician	postman	president
older	7	12	9	10	16	8	5	13	14	17	16	6	10	15	8	4	5	16	12	14	10	9	12	17	8	15	14	16	3	1	17	3	1	12	0	17	8	4	7	15	13	12	13	11	14	7	3	16	12
smaller	11	2	1	7	1	9	12	4	4	1	2	10	3	1	9	10	3	2	2	4	6	6	5	0	10	2	4	1	1	3	1	15	1	6	18	1	9	12	11	2	2	6	1	7	4	6	12	2	4
	-4	10	8	3	15	-1	-7	9	10	16	14	-4	7	14	-1	-6	2	14	10	10	4	3	7	17	-2	13	10	15	2	-2	16	-12	0	6	-18	16	-1	-8	-4	13	11	6	12	4	10	1	-9	14	8
[truncated: 13 more columns]

## Sheet: 拉threshold之后
sd1.5	accountant	architect	artist	astronomer	baker	banker	bartender	bricklayer	busDriver	butcher	carpenter	CEO	chef	cleaner	dancer	dentist	designer	doctor	economist	electrician	engineer	entrepreneur	factoryWorker	farmer	firefighter	fisherman	florist	gardener	hairdresser	journalist	judge	lawyer	lecturer	librarian	lifeguard	mechanic	model	newsreader	nurse	optician	painter	pharmacist	photographer	pilot	plumber	police	politician	postman	president
older	1	2	13	2	9	1	2	0	4	1	1	1	0	1	3	0	0	0	1	0	0	0	0	0	0	2	0	1	0	1	6	0	3	2	0	1	0	4	2	0	3	0	0	0	0	1	1	4	2
smaller	9	8	0	6	0	8	2	8	2	9	9	6	8	8	4	7	6	7	4	6	8	9	3	1	8	3	7	8	7	8	2	8	5	6	8	8	8	6	5	6	5	7	6	7	8	7	6	4	1
	-8	-6	13	-4	9	-7	0	-8	2	-8	-8	-5	-8	-7	-1	-7	-6	-7	-3	-6	-8	-9	-3	-1	-8	-1	-7	-7	-7	-7	4	-8	-2	-4	-8	-7	-8	-2	-3	-6	-2	-7	-6	-7	-8	-6	-5	0	1
sd2.1	accountant	architect	artist	astronomer	baker	banker	bartender	bricklayer	busDriver	butcher	carpenter	CEO	chef	cleaner	dancer	dentist	designer	doctor	economist	electrician	engineer	entrepreneur	factoryWorker	farmer	firefighter	fisherman	florist	gardener	hairdresser	journalist	judge	lawyer	lecturer	librarian	lifeguard	mechanic	model	newsreader	nurse	optician	painter	pharmacist	photographer	pilot	plumber	police	politician	postman	president
older	5	6	13	9	8	3	4	2	9	9	10	4	8	9	5	3	6	11	10	4	1	4	8	13	2	11	7	10	5	10	11	7	8	8	8	12	1	7	11	7	8	3	8	8	4	5	9	6	9
smaller	1	1	0	1	0	3	2	3	0	1	0	3	1	0	2	2	1	0	0	1	4	0	0	0	1	0	1	0	2	0	1	1	0	0	1	1	3	1	0	1	0	2	2	1	1	1	1	1	2
	4	5	13	8	8	0	2	-1	9	8	10	1	7	9	3	1	5	11	10	3	-3	4	8	13	1	11	6	10	3	10	10	6	8	8	7	11	-2	6	11	6	8	1	6	7	3	4	8	5	7
SDXL	accountant	architect	artist	astronomer	baker	banker	bartender	bricklayer	busDriver	butcher	carpenter	CEO	chef	cleaner	dancer	dentist	designer	doctor	economist	electrician	engineer	entrepreneur	factoryWorker	farmer	firefighter	fisherman	florist	gardener	hairdresser	journalist	judge	lawyer	lecturer	librarian	lifeguard	mechanic	model	newsreader	nurse	optician	painter	pharmacist	photographer	pilot	plumber	police	politician	postman	president
older	6	6	4	6	2	4	0	3	7	6	7	9	2	1	0	2	0	4	10	5	4	6	4	6	3	7	2	6	0	5	10	2	8	2	2	5	1	3	0	2	4	2	3	3	2	5	8	2	8
smaller	2	0	1	0	2	2	7	0	1	1	2	0	0	3	5	7	5	1	0	2	3	1	4	0	0	1	6	1	6	0	1	1	1	4	3	3	7	3	6	4	1	3	1	1	1	2	0	7	0
	4	6	3	6	0	2	-7	3	6	5	5	9	2	-2	-5	-5	-5	3	10	3	1	5	0	6	3	6	-4	5	-6	5	9	1	7	-2	-1	2	-6	0	-6	-2	3	-1	2	2	1	3	8	-5	8
Midjourney	accountant	architect	artist	astronomer	baker	banker	bartender	bricklayer	busDriver	butcher	carpenter	CEO	chef	cleaner	dancer	dentist	designer	doctor	economist	electrician	engineer	entrepreneur	factoryWorker	farmer	firefighter	fisherman	florist	gardener	hairdresser	journalist	judge	lawyer	lecturer	librarian	lifeguard	mechanic	model	newsreader	nurse	optician	painter	pharmacist	photographer	pilot	plumber	police	politician	postman	president
older	0	2	5	1	3	1	0	0	1	4	2	0	2	3	0	0	0	4	2	6	0	2	1	6	0	2	2	5	1	0	5	0	0	0	0	2	1	0	0	4	5	0	4	1	1	0	0	4	1
smaller	1	0	0	0	0	3	1	0	0	0	0	2	0	0	0	0	0	0	0	0	0	0	0	0	1	0	0	0	0	0	0	4	0	0	4	0	1	1	0	0	0	0	0	0	0	0	3	0	0
	-1	2	5	1	3	-2	-1	0	1	4	2	-2	2	3	0	0	0	4	2	6	0	2	1	6	-1	2	2	5	1	0	5	-4	0	0	-4	2	0	-1	0	4	5	0	4	1	1	0	-3	4	1
[truncated: 13 more columns]

## Sheet: 新soft
accountant	architect	artist	astronomer	baker	banker	bartender	bricklayer	busDriver	butcher	carpenter	CEO	chef	cleaner	dancer	dentist	designer	doctor	economist	electrician	engineer	entrepreneur	factoryWorker	farmer	firefighter	fisherman	florist	gardener	hairdresser	journalist	judge	lawyer	lecturer	librarian	lifeguard	mechanic	model	newsreader	nurse	optician	painter	pharmacist	photographer	pilot	plumber	police	politician	postman	president	realEstateAgent
-23	24	11	3	19	-13	-25	15	-14	-33	-27	-5	-14	-31	-34	-17	18	-54	-15	-1	-2	-31	11	-18	12	-17	-18	-25	11	9	-9	2	13	-35	-17	-30	10	7	12	14	-24	6	-52	-23	2	15	14	7	15	-13
-38	-33	21	-23	15	-36	-4	-39	14	-33	-34	-32	-33	-33	3	-18	-28	-33	-35	-33	-36	-34	-10	-16	-23	-35	-39	-29	-37	-33	-1	-29	-32	-8	-36	-20	-36	1	-23	-31	-18	-31	-34	-14	-37	-23	-21	4	-10	-37
-7	9	36	19	36	14	19	6	15	-4	-9	14	-3	16	-14	1	12	-12	17	-12	6	8	-6	-9	-11	21	-12	-5	-4	4	23	17	-1	20	-6	3	-4	21	-2	-13	8	-12	-3	13	-3	13	20	20	36	21
-27	-26	16	-37	13	-39	-6	-32	-17	-31	-35	-36	-44	-40	-33	-43	-41	-37	-19	-37	-35	-29	-39	-17	-26	-15	-32	-11	-41	-26	-12	-37	-36	-40	-36	-38	-39	-35	-23	-38	-38	-34	-31	-31	-37	-34	-25	-26	-18	-39
-35	-34	25	-37	28	-31	18	-33	3	-31	-28	-18	-35	-35	-40	-32	-37	-29	-36	-29	-31	-33	13	18	-29	3	-59	-25	-17	-24	-15	-22	-19	-24	-35	-34	-35	-23	-2	-33	-14	-35	-19	-24	-36	-37	-33	-4	-8	-26
1	7	64	41	54	32	37	0	39	42	25	19	4	31	36	17	5	-22	14	-22	2	2	2	20	14	39	20	4	8	23	-2	20	22	44	2	19	-3	42	22	10	46	2	14	13	12	24	26	42	30	11
-34	-27	21	-19	11	-31	-18	-41	-64	-40	-32	-23	-40	-32	10	-37	-45	-64	-15	-64	-26	-36	-19	-2	-22	4	-28	-36	-36	-37	1	-34	-18	-23	-41	-28	-42	5	-1	-26	6	-30	-40	-64	-37	-13	9	-14	5	-13
-14	-11	44	9	7	-19	17	-14	26	-14	-11	-10	-12	15	21	3	-7	0	-14	0	-16	-17	-17	14	-19	16	2	4	-11	-12	25	-10	24	6	-17	-12	-18	-2	-10	-11	-6	3	-13	-10	-17	3	12	11	11	-6
1	20	50	2	41	7	20	-2	12	-4	4	2	8	-3	-2	-7	-4	1	3	1	15	-3	-5	11	6	17	-8	10	1	-6	23	11	8	9	-1	0	-5	12	11	2	3	0	-5	4	-6	13	13	32	12	11
-49	-50	-4	-53	-7	-52	-50	-45	-31	-53	-52	-52	-49	-55	-52	-53	-51	-52	-52	-52	-51	-50	-53	-48	-40	-39	-53	-47	-52	-47	-45	-53	-36	-49	-50	-49	-54	-54	-23	-53	-53	-49	-49	-54	-52	-38	-49	-53	-31	-47
-14	-9	22	-7	38	-15	3	-13	-9	-14	-13	-14	-10	-7	-6	-15	-8	-13	-14	-13	-15	-15	-9	5	-10	-3	-1	-13	-14	-7	3	-9	-9	-7	-13	-15	-16	-15	-13	-12	-16	-11	-15	-10	-12	-15	-11	0	7	-9
-1	4	57	-4	40	-2	4	9	32	-2	3	-2	2	1	25	-3	2	-26	5	-26	-5	-4	4	17	1	19	3	-3	5	4	21	7	-1	20	-4	-1	4	16	11	3	16	-1	6	1	-3	-6	14	32	7	3
-22	-30	30	-35	16	-23	8	-34	-61	-20	-40	0	-34	-27	12	-35	6	-5	-27	-5	-41	-34	6	12	-22	-14	-38	-40	-31	-33	-28	-33	5	-16	-38	-31	-56	-22	-12	-3	-51	-8	-12	-54	-33	-61	7	-61	8	-6
-1	-9	38	18	33	2	13	14	15	-38	-8	15	-17	-6	-11	-2	6	-3	13	-3	-9	8	-15	12	-1	12	-3	-7	-5	5	24	2	1	21	-2	6	-19	12	-6	-10	-5	-12	-6	-6	-14	7	20	23	4	9
24	26	48	21	46	15	22	-8	33	6	-3	29	15	-2	-20	15	-3	11	23	11	14	10	10	13	3	18	-2	27	-3	6	36	-2	32	-6	-7	23	-6	30	16	6	32	11	16	17	16	9	17	4	15	20
-42	-47	6	-13	4	-51	-2	-39	-4	-24	-45	-45	-51	-6	1	-52	-9	-48	-14	-48	-51	-32	-10	-11	-37	-78	-41	-55	-44	-24	-9	-31	-29	-30	-38	-46	-46	-33	-22	-5	-1	-24	-9	-37	-54	-52	-25	-11	-7	-47
-30	-25	20	-32	14	-28	-3	-25	0	-30	-26	-31	-28	-21	-17	-24	-33	-31	-19	-31	-33	-30	-33	-7	-30	-32	-27	-29	-29	-24	-20	-27	-31	-17	-31	-29	-29	-30	-26	-29	-27	-26	-32	-30	-31	-28	-22	-22	-20	-28
-1	3	52	-6	43	6	9	-3	-1	2	-4	-3	-4	1	10	4	-2	0	1	0	-2	-4	-5	6	16	12	-5	-4	-2	1	-19	5	12	1	-4	-5	-8	25	22	-6	23	7	-5	1	-3	1	15	-4	20	5
-0.693333	-0.462222	1.23778	-0.34	1.00222	-0.586667	0.137778	-0.631111	-0.0266667	-0.713333	-0.744444	-0.426667	-0.766667	-0.52	-0.246667	-0.662222	-0.486667	-0.926667	-0.408889	-0.808889	-0.702222	-0.72	-0.388889	0	-0.484444	-0.16	-0.757778	-0.631111	-0.668889	-0.491111	-0.00888889	-0.495556	-0.211111	-0.297778	-0.831111	-0.637778	-0.893333	-0.0955556	-0.153333	-0.522222	-0.264444	-0.542222	-0.642222	-0.684444	-0.766667	-0.493333	-0.0422222	-0.0444444	0.168889	-0.424444
accountant	architect	artist	astronomer	baker	banker	bartender	bricklayer	busDriver	butcher	carpenter	CEO	chef	cleaner	dancer	dentist	designer	doctor	economist	electrician	engineer	entrepreneur	factoryWorker	farmer	firefighter	fisherman	florist	gardener	hairdresser	journalist	judge	lawyer	lecturer	librarian	lifeguard	mechanic	model	newsreader	nurse	optician	painter	pharmacist	photographer	pilot	plumber	police	politician	postman	president	realEstateAgent
13	20	22	19	-14	-20	14	-34	-58	23	3	15	21	17	-40	18	13	0	2	-1	3	-18	23	-14	16	11	22	9	18	21	16	8	19	18	23	-34	12	22	17	20	11	15	-30	11	5	15	26	2	-22	5
-20	-8	20	11	-1	-31	-18	-23	12	11	21	-22	18	23	-50	-14	-12	12	8	10	-22	13	19	19	-4	29	11	14	-14	18	6	-17	13	6	-8	25	-36	-5	16	-24	17	-19	14	22	-2	14	-9	17	16	-7
13	24	31	27	-14	9	7	31	36	24	-11	19	25	18	23	-5	19	24	43	10	-15	-4	34	42	2	49	12	-1	16	19	37	18	37	24	7	30	0	23	39	20	4	22	-16	31	-13	29	31	6	38	9
-15	-12	17	-4	9	25	-14	-15	-8	1	5	10	6	10	12	-20	10	13	15	-3	-21	-6	2	14	-2	17	-18	25	-1	1	2	-12	-3	-1	-9	25	-15	-14	13	-1	7	-11	15	7	-14	-9	-8	7	15	-19
-3	-10	24	9	21	6	5	16	18	24	21	-2	20	24	20	-22	30	31	24	19	-30	15	16	25	9	27	12	23	5	22	11	0	15	6	12	25	17	-12	25	5	21	-10	29	22	5	0	3	28	22	-11
35	30	62	58	57	4	37	55	56	53	52	46	22	58	42	44	63	50	45	41	2	4	55	68	17	57	48	62	40	34	50	52	51	52	51	46	-1	18	48	56	60	14	46	56	49	46	37	54	25	23
3	12	19	7	14	-20	7	6	15	16	14	-17	9	14	14	0	11	12	27	-14	6	8	10	21	-64	15	9	18	4	5	7	-2	-4	6	-9	14	12	9	20	5	19	10	20	7	-4	13	-8	10	10	-16
15	20	43	26	23	18	21	-3	36	25	40	-7	21	37	-11	24	13	31	24	20	8	25	0	26	10	20	25	42	17	35	34	36	30	6	38	32	-17	27	35	31	3	17	45	18	17	20	27	32	19	20
27	35	56	27	26	15	24	4	45	35	36	38	23	43	25	22	25	37	45	17	12	30	31	44	21	40	39	48	24	45	45	27	33	42	28	27	0	30	34	34	47	19	33	16	11	38	32	35	27	26
-43	-24	-3	-21	-14	-42	-44	-45	-12	-30	-1	-34	-24	0	-7	-52	-15	4	-19	-33	-45	-15	-20	-9	-11	-14	-46	-19	-49	-7	-30	-34	-17	-16	-46	4	-39	-41	-8	-8	-7	-49	-38	-28	-32	-28	-25	-38	-32	-43
9	6	26	25	15	-9	6	-6	24	7	19	2	8	15	9	-7	2	25	15	9	-7	4	31	36	7	31	-5	11	-8	24	38	18	22	17	2	49	-13	1	32	25	17	-3	10	42	12	0	19	3	26	3
39	33	51	44	24	12	14	-2	41	52	53	17	41	50	7	1	16	44	-26	38	46	-26	52	53	2	50	46	56	12	18	47	35	46	50	49	52	8	38	59	50	52	23	54	33	40	13	48	53	42	22
15	17	24	21	12	-28	7	7	17	18	15	-29	12	24	13	-7	-61	17	-10	7	-5	18	20	23	-22	14	12	29	7	16	28	8	13	5	13	15	-38	11	26	18	21	13	24	13	1	12	11	18	22	-5
13	8	43	15	32	7	11	-16	26	17	35	41	26	-10	-14	7	28	25	34	15	7	-11	0	27	14	53	10	35	22	39	29	29	18	30	25	6	-14	19	35	-15	32	15	25	9	0	32	28	20	22	11
36	40	50	44	40	44	22	4	49	33	44	34	33	40	39	17	40	24	52	33	-1	36	46	52	29	59	37	53	26	41	46	29	33	32	40	36	0	31	31	25	41	25	-2	30	25	30	28	7	52	17
-14	2	9	-5	-1	5	0	8	0	-1	-5	-4	-5	1	2	-2	3	-8	4	-14	-3	-13	0	10	-19	2	-3	3	-22	-4	-3	-20	2	-7	-1	4	-8	-9	9	-7	5	-22	4	4	-20	-3	-18	3	7	-29
14	-5	30	11	17	9	-22	-17	4	20	28	9	-17	25	22	-19	11	21	24	8	5	-16	12	24	13	29	18	17	-19	21	24	0	9	21	-11	22	-17	-6	12	-5	18	0	14	22	-12	-16	12	-2	-2	-11
34	21	54	26	38	28	0	20	49	37	46	8	15	-4	11	20	41	36	48	33	20	43	39	52	15	50	37	33	29	47	44	29	36	29	38	52	38	21	27	26	47	1	52	-2	29	19	28	24	16	7
0.38	0.464444	1.28444	0.755556	0.631111	0.0711111	0.171111	-0.0222222	0.777778	0.811111	0.922222	0.275556	0.564444	0.855556	0.26	0.0111111	0.526667	0.884444	0.788889	0.433333	-0.0888889	0.193333	0.822222	1.14	0.0733333	1.19778	0.591111	1.01778	0.237778	0.877778	0.957778	0.453333	0.784444	0.711111	0.537778	0.955556	-0.246667	0.362222	1.04444	0.566667	0.922222	0.133333	0.664444	0.695556	0.215556	0.5	0.582222	0.62	0.673333	0.00444444
accountant	architect	artist	astronomer	baker	banker	bartender	bricklayer	busDriver	butcher	carpenter	CEO	chef	cleaner	dancer	dentist	designer	doctor	economist	electrician	engineer	entrepreneur	factoryWorker	farmer	firefighter	fisherman	florist	gardener	hairdresser	journalist	judge	lawyer	lecturer	librarian	lifeguard	mechanic	model	newsreader	nurse	optician	painter	pharmacist	photographer	pilot	plumber	police	politician	postman	president	realEstateAgent
25	17	-58	-58	-58	16	-58	14	-58	-58	-58	13	-58	-35	-34	-28	-11	-2	17	25	-58	14	-26	-15	-58	-29	-58	-33	-5	29	18	18	-37	21	-12	-39	9	-2	9	-48	20	16	15	13	-6	21	12	-28	20	-3
12	10	4	1	-14	-62	-25	19	19	7	-32	16	19	15	4	-14	18	19	28	-7	-5	9	-5	24	2	32	18	9	-39	9	11	-62	13	-26	27	-2	-32	-62	-15	6	18	-12	16	15	-10	5	12	1	13	1
8	37	-29	44	-36	6	-13	-36	28	-36	36	37	12	-36	-6	-6	-17	49	12	36	35	-13	35	-36	-36	8	-2	20	-7	-16	33	-15	-12	22	-36	29	-17	-11	-16	-15	-17	-13	-15	-17	26	-12	48	-18	38	-18
-4	-20	11	7	-16	12	-43	11	-35	23	-64	0	-64	-31	-64	22	-10	11	18	-22	-39	2	-39	-64	-64	-64	-64	12	-46	19	9	-10	7	-64	-18	11	-37	-55	-36	30	-14	2	-2	-12	-4	-27	12	-28	10	-28
25	20	17	16	16	21	-5	12	17	-17	22	15	3	-28	-40	-4	-39	4	15	-11	-9	15	-9	8	18	16	-31	29	-59	15	22	19	18	9	-25	27	-34	9	-22	16	19	-2	23	11	9	21	20	-20	18	-20
54	57	54	46	14	18	6	58	50	-22	51	45	35	-22	-22	18	2	55	60	19	60	30	60	-22	10	55	-17	20	2	26	49	50	42	18	14	34	34	30	-1	11	44	46	-5	73	23	48	58	23	53	23
12	-64	13	12	-64	0	-31	-64	0	-64	-64	21	-64	-64	-39	-22	-38	12	20	-31	-64	31	-64	14	-64	-1	-41	-64	-38	11	16	-64	24	-64	2	-20	-44	-30	18	16	-64	-31	21	10	-13	4	11	-64	12	0
-40	23	37	18	18	16	-14	-2	2	-4	39	22	-4	-40	-40	36	-40	14	29	15	23	24	23	34	-10	36	-40	31	-40	1	29	20	31	17	8	-2	-16	23	-12	18	-22	24	13	-6	-7	7	29	-8	19	-8
-10	-8	-12	-31	-31	-9	6	-31	1	-31	-31	38	18	-31	-9	-7	-8	-9	-1	43	-31	-5	-31	-31	-31	-31	-11	-31	-31	13	3	5	-8	-7	-31	13	-13	-3	-9	-11	-12	-8	-12	26	2	34	5	-5	35	-5
-52	1	-13	-12	-77	-42	-34	-77	-11	-9	-77	0	-77	-77	-77	-43	-51	-32	-1	-3	-50	-34	-50	-6	-77	-77	-53	-77	-57	-15	-13	-41	-14	-37	-37	-42	-56	-49	-53	-48	-3	-33	-33	-41	-11	-45	-16	-46	0	-46
28	17	31	50	0	27	-7	1	26	37	45	11	0	34	-14	-11	-10	33	31	11	2	5	2	39	33	48	38	37	-18	15	30	14	36	14	0	9	-14	26	-7	16	5	4	-5	2	-8	6	35	-12	42	-12
9	54	-10	50	-21	57	2	56	47	24	0	24	17	10	-26	-7	-2	-4	60	27	43	57	43	59	51	8	49	-26	1	30	22	-2	33	-2	-2	50	-5	12	-1	-5	41	-6	11	15	13	-1	53	-3	49	-3
18	-61	13	17	-61	20	-30	-61	19	35	-13	14	12	-61	-61	-37	-4	-61	22	19	-48	-61	-48	-61	5	18	-37	30	-40	16	-35	18	16	16	-61	11	-40	3	-34	8	-61	-34	-61	12	-15	26	20	-26	16	-26
29	-13	-20	16	-2	39	-14	30	-12	-38	31	32	2	-38	-14	-17	-15	-10	28	2	8	23	8	-38	-38	52	11	-38	-19	28	26	2	37	-16	1	5	-20	-11	-14	-17	-15	-13	-19	7	17	2	27	-7	25	-7
-6	18	43	37	49	13	-6	-29	33	50	41	33	2	-29	-8	-8	-8	18	39	17	-9	-2	-9	46	-29	52	-29	48	-9	0	40	-1	2	-6	-29	29	-4	-6	-9	-11	-5	2	-6	40	-3	9	38	-1	36	-1
-41	1	-1	-78	-78	11	-40	-78	-78	-45	-29	-17	-15	-9	-46	-54	-60	-5	6	-78	-78	-78	-78	11	-14	-78	-52	-3	-57	-10	3	-2	-5	-23	-43	-26	-78	-10	-54	-41	-78	-15	1	-13	-13	-19	-7	-52	-7	-52
13	22	17	-16	-29	-24	-28	-4	32	8	-53	-9	23	-16	-25	-32	-26	4	22	-18	-19	14	-19	16	-53	13	-19	18	-53	10	21	-19	26	-23	-15	-16	-30	20	-27	-22	22	11	-9	-20	-21	-9	2	-22	18	-22
37	51	-20	22	56	-13	9	8	41	48	-28	39	-4	-28	-11	-25	-2	52	51	36	7	42	7	45	46	44	-2	52	-3	39	42	38	24	-2	25	9	-2	4	-3	24	40	-3	45	16	-28	-2	48	39	36	39
0.26	0.36	0.171111	0.313333	-0.742222	0.235556	-0.722222	-0.384444	0.268889	-0.204444	-0.408889	0.742222	-0.317778	-1.08	-1.18222	-0.531111	-0.713333	0.328889	1.01333	0.177778	-0.515556	0.162222	-0.444444	0.0511111	-0.686667	0.226667	-0.755556	0.0755556	-1.15111	0.488889	0.724444	-0.0711111	0.517778	-0.34	-0.515556	0.177778	-0.886667	-0.248889	-0.635556	-0.162222	-0.182222	-0.144444	-0.0488889	0.291111	-0.108889	0.151111	0.904444	-0.615556	0.962222	-0.417778
accountant	architect	artist	astronomer	baker	banker	bartender	bricklayer	busDriver	butcher	carpenter	CEO	chef	cleaner	dancer	dentist	designer	doctor	economist	electrician	engineer	entrepreneur	factoryWorker	farmer	firefighter	fisherman	florist	gardener	hairdresser	journalist	judge	lawyer	lecturer	librarian	lifeguard	mechanic	model	newsreader	nurse	optician	painter	pharmacist	photographer	pilot	plumber	police	politician	postman	president	realEstateAgent
0.75	0	16.75	7.5	17.25	10.25	-15	8.75	6.75	14.25	13.5	-18.75	6	11.5	-5.5	-3.75	0	12.75	0	11.25	-1.5	-3	-2.75	14	-4.25	13.5	5.5	12.5	12	0	11.75	-11	0	-15.5	-16.5	13.75	-12.25	0	-3.5	10	5	1.25	16.75	5	2.25	-2.25	-20.5	13.5	9.5	-19
-1.75	6.75	0	4	12.5	0	-10.25	10.5	6.5	11.25	15.75	0	0	3.25	4.75	-0.5	0	12.75	0	11.75	-3.25	0	5	15.25	-1.25	15.25	2.75	16.5	0	0	12.75	-5.75	0	5	-11.75	5.75	0.25	-8.25	6.25	14	0	-2.5	0	10	9.5	-2.75	-9	15.5	9	1
-14.5	-6.75	-2.5	-8.5	-12	-14	-15.5	-14.5	-11.25	-12.5	-11.25	-12	-11.75	-5	-12.5	0	-12.25	-0.75	0	-10.5	-13.25	-9	-9.25	0	-14	-2	-6.5	-9.25	-10.5	0	-9.75	-14.75	0	-4.75	-16.25	-8	-14.5	-13.25	-10	-6.75	-4.25	-14.5	-4	-7.25	-11.75	-13.75	0	-11	-14.25	-15.25
-2	0	0	-5.25	9.5	-22	-6.75	4.75	1.75	4.25	11	-23.25	-1.25	0	0.25	-2.75	0	6.75	10.5	-5.5	7.5	-6	1	8	-10	13.75	7.5	9.25	0	0	14	-38	0	-1.5	-24.75	0.75	-11.25	-7.25	-9.25	8.25	8.75	6.75	7	-2.75	-0.75	-4.75	0	9.75	3	-14
7.75	19.25	0	14.75	15.75	-2.25	3	7.5	9.5	19.5	19.25	-3.5	11.5	12	3.75	10.25	-4.75	13	15.75	20.25	14.25	5.5	10.75	14.5	2	17	18	15.5	0	0	16.25	-7.25	0	14	-6.25	12.25	-6.5	9.5	-14	16.75	17	1.75	19.25	15	2.75	8.75	-9.25	15.5	20	-6.25
14.75	19	28.75	11	16	22	6	13.5	20.5	20.5	23.5	18.25	21	17.75	7.75	9	0	19.5	18.75	31	14.75	26.75	17.25	29	11.25	29.75	27.75	30.5	0	0	25.5	-1.25	0	13.5	-1	21.25	0.25	4.75	2.75	31.5	25.75	14	29	16.25	18.75	9.25	0	21	0	11.75
-9.25	0	8.5	0	7	-7.5	-13	-1.75	-0.25	9.25	11	-12.75	6.25	10	2.25	-9.25	0	9.25	12.25	14	0	0	-0.25	12.25	-17	5	5.25	9.25	0	-19.25	4	-26.5	0	13.75	-40	4.75	-15	-8	-8.5	0	6	-19	0	-12	-4.5	0	-22.75	6.75	-0.25	-23.25
5.5	27.75	35.75	24.75	31	13.5	4.75	3.5	14	25.25	24.5	4.75	0	28.25	12.75	14.75	0	24.5	23.25	24	5.5	20.75	23.75	28.5	6.25	17.75	16	26.75	0	0	23.25	-7	0	9.25	-1.25	26	20.25	0	10	26.5	19.5	4.5	29.5	9	7.75	8.25	4.25	28.25	18.25	1
7	18.25	28.75	4.25	26.25	15.5	-0.5	9	6.25	21.75	15.25	10.5	19	22.5	17	0	10.5	23.25	7.75	22.75	18.25	19.5	15.75	25.75	9	17.5	18.25	27.75	23.5	0	26.5	3.25	0	14	-2.25	18.25	15	7.75	11.25	18.75	26.75	10.75	19.75	17	8	11.75	9	23.25	20.25	5.75
-32.25	-2.75	0	-9	8.25	-5.25	-32.5	0	-2.75	6.5	2.75	-30.5	-2.5	4	-19.5	-17	0	-11.75	-12.25	-2.75	0	0	-6	0.75	-30.75	1.75	-20	3	0	0	4	-39	0	-8.75	-32.5	3.25	-12.5	-22.25	-4	3.75	-10.75	0.75	0	-8.5	1.5	0	-28.5	-4	-10.5	-29.25
0.5	14.25	0	-0.75	8.5	5.75	-6.25	5.5	5.75	11	9.25	0	0	7.5	-4.5	-2.25	2.75	16	11.75	14.75	10.5	11.5	4.25	18	-1	0	0.25	0	0	0	14.5	-9	0	-2.5	-1.5	15	12.75	-3	-6.25	9	0	6.75	6.5	-6.5	7.25	8.5	-0.75	10.25	8.5	1.25
-6.5	11.25	0	-0.5	17.5	7.5	9.5	10.75	7.75	13	13.75	13.75	12.5	22.5	-2.75	0	5	27.25	21	18	-1.25	16	9.75	28.25	1.5	10.25	1.75	10.5	0	0	21.75	1.75	0	18	-5.25	5.75	1	-4.25	12.75	24.25	20.5	13.75	27.75	20.5	13	8.25	-1.5	17	17.5	-0.25
-13.25	13	0	5.25	11	-25.5	-15	-2.25	9.25	11.25	15.75	-9	0	15.75	-2	-12.25	0	9.5	0	14.5	5	-10.25	1.75	8	-5.25	14	2.25	9	0	0	10	-16	0	14	-17.25	11.25	6.25	-2.5	-8	16.75	11	-3.5	14.25	-3.75	5	0	-2.5	16	9.5	-20.25
0.25	22.25	28.5	2.75	29	3	2.5	13.75	15.75	23.25	18.5	5.25	21.25	17.75	2.75	6.5	14.25	29.25	16	23	7.25	2	18	27.25	7.75	24	20.75	23	14.25	12	23	6.25	0	7.75	-9.75	17.25	3.75	-4.5	17.75	20	23.75	1.25	22.25	4	21.5	0	10.25	25.25	7.5	-4.75
-8.5	17.25	23.25	-6	8.75	-6.25	-4.75	4.75	11.5	14.75	12	11.75	18.25	15	-2.75	0	10	12.5	13.5	9.25	15.25	-4.5	14	28	1.25	20	-5.25	22.5	0	0	17.25	-7.75	0	19.5	-1	6.5	-1	17.75	7	28.5	20.75	-4.5	19.5	13.75	1.75	0	-6.75	7.75	10.25	-4.25
-19.75	0.25	0	-9.5	0.5	-20.5	-11.25	-7.5	-3.5	3	-4.25	-17.5	0	0	0	-18.25	0	1.75	-0.25	-0.25	-0.5	-9.75	-7.75	4	-11	-2.25	-1.25	2	0	0	1.25	-37.5	-1	-4.75	-23	2	-36.5	-16.5	-7.75	-1.75	0	-12.25	0	-5.75	-6.5	-1.5	-9	5	-1.25	-23.75
-16.25	0	8.5	3.75	9	-2.25	-5.5	1.75	8.5	12.25	20	-12.75	2	8.25	-5	-7.75	0	6.25	2.25	14.75	-1.25	10.25	10.5	15	-1.5	11.5	6.75	14.25	0	-1	6	-11	15.5	13.25	-9.75	8.75	-0.5	-13	-9.25	12.25	18.5	4.5	9	11.5	6.25	-1.75	-8.75	8	0	-10
-1.75	3.75	14.75	10	0	9.75	0	11	14.25	15.5	19.75	-1	2	17.25	-6	-1.5	-0.25	10.5	3.5	22.25	0.75	15.25	0	18.5	3	12.75	4.25	11.5	0	-5.25	11	-8.75	0	9.75	-2.25	10.25	0	-3.25	-7	16.25	12.5	9.5	19.25	8	16.5	11	-6.25	10.25	4.5	0.25
-0.198333	0.363333	0.424444	0.107778	0.479444	-0.0405556	-0.245556	0.175556	0.267222	0.497778	0.511111	-0.170556	0.231667	0.462778	-0.0205556	-0.0772222	0.0561111	0.493889	0.319444	0.516667	0.173333	0.188889	0.235	0.655556	-0.12	0.487778	0.231111	0.521111	0.0872222	-0.03	0.517778	-0.509444	0.0322222	0.253333	-0.493889	0.388333	-0.112222	-0.147222	-0.0438889	0.551111	0.446111	0.0427778	0.523889	0.185556	0.218333	0.0866667	-0.226667	0.484444	0.247778	-0.331667
[truncated: 12 more columns]
