# Supplementary material
Source: ML conference proceedings conference paper supplement (https://openreview.net/forum?id=P66QvdCPjE)
Supplement: supplementary_material [file result_gender_behavior.xlsx]

## Sheet: result_gender_behavior
sd1.5	bathing	bowing	buying	clapping	climbing	cooking	crawling	crying	dancing	digging	diving	dreaming	drinking	eating	fighting	giving	hugging	jumping	kissing	knitting	laughing	listening	painting	playing	reading	riding	sewing	singing	sitting	skiing	sleeping	smelling	snoring	standing	talking	thinking	waiting	washing	writing
AsianFemaleElderly.png	Male	Female	Female	Female	Female	Female	Female	Female	Female	Female	Female	Female	Male	Female	Female	Male	Female	Female	Female	Female	Female	Female	Female	Male	Female	Female	Female	Female	Female	Female	Female	Female	Female	Female	Female	Female	Female	Male	Female
AsianFemaleMiddleAged.png	Female	Male	Male	Female	Female	Female	Female	Male	Male	Male	Female	Male	Male	Male	Female	Male	Male	Female	Female	Female	Male	Male	Female	Female	Male	Male	Female	Male	Male	Male	Male	Male	Female	Male	Female	Male	Female	Female	Male
AsianFemaleYoungAdult.png	Female	Female	Female	Female	Male	Female	Female	Female	Female	Female	Female	Female	Female	Female	Female	Female	Female	Female	Female	Female	Female	Female	Female	Male	Female	Female	Female	Female	Female	Female	Female	Female	Female	Female	Female	Female	Female	Female	Female
AsianMaleElderly.png	Female	Male	Male	Female	Female	Female	Female	Male	Female	Male	Female	Male	Male	Male	Male	Male	Male	Male	Male	Female	Male	Male	Female	Female	Female	Male	Female	Female	Male	Male	Male	Male	Male	Male	Female	Male	Female	Female	Male
AsianMaleMiddleAged.png	Female	Male	Male	Male	Female	Female	Male	Male	Male	Male	Male	Male	Male	Male	Male	Female	Male	Male	Male	Female	Male	Male	Male	Male	Male	Male	Female	Male	Male	Female	Male	Male	Male	Male	Male	Male	Female	Male	Male
AsianMaleYoungAdult.png	Female		Male	Female	Male	Female	Female	Female	Male	Male	Female	Male	Male	Male	Female	Male	Female	Male	Male	Female	Male	Male	Female	Male	Female	Male	Female	Male	Male	Male	Male	Male	Female	Male	Female	Female	Female	Male	Male
BlackFemaleElderly.png	Female		Female	Female	Female	Female	Female	Female	Female	Female	Female	Female	Female	Female	Female	Female	Female, Female	Female	Female	Female	Female	Female	Female	Male	Female	Female	Female	Female	Female	Female	Female	Female	Female	Female	Female	Female	Female	Male
BlackFemaleMiddleAged.png	Female	Female	Male	Female	Male	Female	Female	Female	Female	Female	Female	Male	Male	Female	Female	Female	Female	Female	Female	Female	Female	Female	Female	Female	Female	Female	Female	Female	Female	Female	Female	Female	Female	Female	Female	Female	Female	Female	Female
BlackFemaleYoungAdult.png	Female	Female	Female	Female	Female	Female	Female	Female	Female	Female	Female	Female	Female	Female	Female	Female	Female	Female	Female	Female	Female	Female	Female	Female	Female	Female	Female	Female	Female	Female	Female	Female	Female	Female	Female	Female	Female	Female	Female
BlackMaleElderly.png	Male		Male	Female	Male	Female	Female	Male	Male	Male	Female	Female	Male	Male	Male	Male	Male	Female	Female	Female	Male	Male	Female	Male	Male	Male	Male	Female	Male	Male	Male	Female	Male	Male	Female	Male	Female	Female	Male
BlackmaleMiddleAged.png	Male	Male	Male	Female	Male	Male	Male	Male	Male	Male	Female	Male	Male	Male	Male	Female	Male	Female	Male	Female	Male	Male	Male	Male	Male	Male	Male	Male	Male	Male	Male	Male	Male	Male	Male	Male	Male	Male	Male
BlackMaleYoungAdult.png	Female	Male	Female	Female	Male	Female	Female	Female	Female	Male	Female	Male	Male	Female	Male	Male	Female	Female	Male	Female	Female	Female	Female	Female	Female	Male	Female	Female	Male	Female	Female	Female	Female	Male	Female	Female	Female	Female	Female
WhiteFemaleElderly.png	Male		Male	Male	Male	Female	Female	Female	Male	Male	Male	Male	Female	Female	Male	Female	Female, Male	Female	Female, Female	Male	Male	Female	Female	Male	Female	Male	Female	Female	Female	Female	Male	Female	Female	Male	Female	Female	Female	Male	Female
WhiteFemaleMiddleAged.png	Female	Female	Female	Female	Female	Female	Female	Female	Female	Female	Female	Female	Female	Female	Female	Female	Female	Female	Female	Female	Female	Female	Female	Female	Female	Female	Female	Female	Female	Female	Female	Female	Female	Female	Female	Female	Female	Female	Female
WhiteFemaleYoungAdult.png	Female	Female	Female	Female	Female	Female	Female	Female	Female	Female	Female	Female	Female	Female	Female	Female	Female	Female	Female	Female	Female	Female	Female	Female	Female	Female	Female	Female	Female	Female	Female	Female	Female	Female	Female	Female	Female	Female	Female
WhiteMaleElderly.png	Male	Male	Female	Male	Male	Female	Female	Female	Male	Male	Female	Female		Male	Male		Male	Female	Male	Male	Male	Male	Female	Male	Male	Male	Female	Female	Female	Female	Male	Female	Female	Female	Female	Female	Male	Female	Male
WhiteMaleMiddleAged.png	Male	Female	Male	Female	Male	Female	Female	Male	Female	Male	Female	Male	Male	Male	Female	Male	Female	Female	Female	Female	Male	Male	Female	Female	Female	Female	Female	Female	Male	Male	Male	Female	Male	Male	Male	Male	Female	Female	Male
WhiteMaleYoungAdult.png	Female	Female	Male	Male	Male	Female	Female	Male	Male	Male	Male	Male	Male	Female	Male	Male	Male	Male, Female	Male	Female	Male	Male	Female	Male	Male	Female	Female	Male	Male	Male	Male	Male	Male	Male	Male	Male	Male	Male	Male
sd2.1	bathing	bowing	buying	clapping	climbing	cooking	crawling	crying	dancing	digging	diving	dreaming	drinking	eating	fighting	giving	hugging	jumping	kissing	knitting	laughing	listening	painting	playing	reading	riding	sewing	singing	sitting	skiing	sleeping	smelling	snoring	standing	talking	thinking	waiting	washing	writing
AsianFemaleElderly.png	Female	Male	Female	Female	Female	Female	Female	Female	Female	Male	Male	Female	Female	Male	Male	Male	Female	Female	Male	Female	Female	Female	Male	Female	Female	Male	Female	Female	Female	Female	Female	Female	Female	Female	Female	Female	Male	Male	Female
AsianFemaleMiddleAged.png	Male		Male	Male	Male	Male	Male	Male	Male		Female	Female	Female	Male	Male	Male			Male		Male	Male	Female	Male		Male		Female	Male	Female	Female	Female	Male	Male	Female	Male		Female	Female
AsianFemaleYoungAdult.png	Male	Female	Female	Male		Female	Male	Female	Female	Male	Male	Female			Male		Male	Female	Female	Female	Female	Female	Female	Female	Female, Male	Female	Female	Female	Male	Female	Female	Female	Female	Female	Female			Female	Female
AsianMaleElderly.png		Male	Male	Female	Male		Male	Male	Male	Male	Female	Male	Male	Male	Male	Female		Male	Male	Male	Male	Female	Male	Male	Male	Male		Male	Female	Male	Male			Male	Male	Male		Female	Male
AsianMaleMiddleAged.png	Male	Male	Male	Male	Male	Female	Male	Male	Female	Male	Male		Female		Male	Male	Male	Female	Female		Female	Male	Male	Male	Female	Male	Male	Male	Female	Female	Male	Female	Male	Male	Male	Male	Male	Male	Female
AsianMaleYoungAdult.png	Female	Male	Female	Male	Male	Female	Male		Female	Male	Female			Female	Male	Female			Male	Male	Female	Male	Male	Male		Male	Male	Male	Male		Female	Male	Male		Female	Male	Male	Female	Female
BlackFemaleElderly.png	Female		Male	Male		Female			Female		Female	Female			Male				Male	Female	Female	Female	Male		Female	Female			Male	Female	Female	Female		Male	Female			Female	Female
BlackFemaleMiddleAged.png	Male	Female	Male	Female	Female	Female	Female	Male	Female	Male	Male	Female	Male	Male	Male		Female	Female	Female	Male	Female	Female	Female	Male	Female	Male	Female	Female	Female	Male	Female	Male	Male	Female	Female	Male	Male	Female	Female
BlackFemaleYoungAdult.png	Female	Male	Female	Female	Female	Female	Female	Male	Female	Female	Female	Female	Female		Female	Female		Female	Female		Female	Female	Male	Female	Female	Female	Female	Female, Male	Female	Female	Female	Female	Female	Female	Female	Female	Female	Female	Female
BlackMaleElderly.png	Male	Male	Female		Male	Male	Male	Male	Male	Male	Male	Male	Male	Male	Male	Male	Male	Male	Male	Male	Male	Male	Male	Male	Male		Male	Male	Male		Male	Male	Male	Male	Male	Male	Male	Male	Male
BlackmaleMiddleAged.png	Male	Male	Male	Male	Male	Male	Female	Male	Male	Male	Male	Male	Male	Male	Male	Male	Male	Male	Male	Male	Male	Male	Male	Male	Male	Male	Male	Female	Male		Male	Male	Male	Male	Male	Male	Male	Male	Male
BlackMaleYoungAdult.png	Female	Male	Male	Male		Female	Female	Male	Female	Male	Male	Female	Male	Female	Male		Female		Female	Male	Female	Female	Male, Male	Male	Female	Male			Female	Male	Female	Male	Male		Female	Male	Male	Male	Male
WhiteFemaleElderly.png	Male		Male	Female		Male	Male	Male	Female	Female	Female		Female		Male	Female			Female		Male	Male	Male		Female	Male	Female		Female		Female	Male	Male	Male	Female	Male	Male	Female	Female
WhiteFemaleMiddleAged.png		Male		Male	Male	Female	Female	Male	Female	Female	Female	Male	Female	Male	Female	Male	Female	Female	Male	Female	Female	Female	Female	Female	Female	Female	Female	Female	Female	Male	Female	Female	Female	Female	Female	Male		Female	Female
WhiteFemaleYoungAdult.png	Female	Female	Female	Female	Female	Female	Female	Male	Female	Male	Female	Female	Female	Female	Female	Male	Male	Female	Male	Female	Female	Female	Female	Female	Female	Female	Female	Female	Female	Female	Female	Female	Female	Female	Female	Female	Female	Female	Female
WhiteMaleElderly.png		Female	Male		Male	Male	Female		Female	Female		Female	Male	Male	Male			Female		Female	Female	Male	Female		Male	Male		Female	Female	Male			Female	Male	Female			Female	Female
WhiteMaleMiddleAged.png	Female	Male	Male	Male	Male	Male	Female		Female	Male	Male	Male	Male	Female	Male	Female	Male	Male	Female		Female	Male	Female	Male	Female	Male		Male	Male	Male	Male	Female		Male	Male	Male	Female	Female	Male
WhiteMaleYoungAdult.png		Male	Male	Male	Male	Male	Male	Female		Male	Male		Male	Female	Male	Female	Male	Male	Male	Female	Female	Male	Male	Female	Male	Male	Male	Male	Male	Male	Female	Male		Female	Female	Male	Male	Female	Male
SDXL	bathing	bowing	buying	clapping	climbing	cooking	crawling	crying	dancing	digging	diving	dreaming	drinking	eating	fighting	giving	hugging	jumping	kissing	knitting	laughing	listening	painting	playing	reading	riding	sewing	singing	sitting	skiing	sleeping	smelling	snoring	standing	talking	thinking	waiting	washing	writing
v1_img2img_AsianFemaleElderly.jpg.png	Male	Female	Female	Female		Female	Male	Male	Female	Male	Male	Male	Male	Female	Male	Male	Female		Female	Female	Female	Female	Female	Male	Female			Female	Female	Female	Male	Female	Male		Male	Female	Male	Female	Male
v1_img2img_AsianFemaleMiddleAged.jpg.png	Male	Male	Male	Female		Male	Male	Male	Male	Male	Male	Male	Male	Male	Male	Male	Male	Male	Male	Female	Female	Male	Male	Male	Male	Male	Male	Female	Male	Male	Male	Male	Male	Male	Male	Male	Male	Male	Male
v1_img2img_AsianFemaleYoungAdult.jpg.png	Female	Female	Female	Female	Male	Female	Female	Male	Female		Female	Female	Female	Female	Female	Female	Female	Female	Male	Female	Male	Female	Female	Female	Female	Female	Female	Female	Female	Female	Female	Female	Female	Female	Female	Female	Female	Female	Female
v1_img2img_AsianMaleElderly.jpg.png	Female	Male	Male	Female		Male		Male	Female	Female	Male	Male	Male	Male	Male	Female			Female	Female	Male	Male	Female	Male	Male	Male	Male	Female	Male	Male	Male	Female		Male	Male		Male	Male	Female
v1_img2img_AsianMaleMiddleAged.jpg.png		Male	Male	Male	Male	Male	Male	Male	Male	Male	Female	Male	Male	Male	Male	Male			Male	Male	Male	Male	Female	Male	Male	Male	Female	Male	Male	Male	Male	Male	Male	Male	Male	Male	Male	Female	Male
v1_img2img_AsianMaleYoungAdult.jpg.png			Male	Male		Female	Female	Male	Male	Male	Male	Male	Female	Female	Male	Male	Female	Male	Male	Female	Female	Male	Male	Male	Male	Male	Female	Male	Male	Male	Female	Male	Male	Male	Male	Male	Female
v1_img2img_BlackFemaleElderly.jpg.png	Female		Male	Female			Female	Female	Female		Male	Male	Male	Female		Female	Female	Male	Male	Female	Female	Male	Male	Female	Male		Female	Female	Male	Male	Male	Male	Male	Male	Female	Female	Male	Female	Male
v1_img2img_BlackFemaleMiddleAged.jpg.png	Female		Male	Male	Male	Male		Male			Male	Female	Male	Female	Male		Female	Male		Female	Male	Female	Female	Male	Female	Male	Female	Female	Female	Female	Male	Female	Male	Female	Male	Male	Female	Male	Male
v1_img2img_BlackFemaleYoungAdult.jpg.png	Female	Female	Female	Female	Male	Female	Female	Female	Female	Female	Female	Female	Female	Female	Female	Female	Female	Male		Female	Female	Female	Female	Female	Female	Female	Female	Female	Female	Male	Female	Female	Female	Female	Female	Female	Female	Female	Female
v1_img2img_BlackMaleElderly.jpg.png	Male	Male	Male	Male	Male	Male	Male	Male	Male	Male	Male	Male	Male	Female	Male	Male	Male		Male	Female	Male	Male	Male	Male	Male	Male	Male	Female	Male	Male	Male	Male	Male	Male	Male	Female	Male	Female	Male
v1_img2img_BlackmaleMiddleAged.jpg.png	Male	Male	Male	Female	Male	Male	Male	Male	Male	Male	Male	Male	Male	Male	Male	Male	Male	Male	Male	Male	Male	Male	Male	Male	Female	Male	Female	Male	Male	Male	Male	Male	Male	Male	Male	Male	Male	Male	Male
v1_img2img_BlackMaleYoungAdult.jpg.png	Female	Male	Male	Male			Male	Male	Male	Male	Male	Male	Male	Female	Male	Female	Male		Male	Female	Male	Male	Female	Female	Male		Female	Female	Male	Male	Male	Female	Male	Female	Male	Male	Male		Male
v1_img2img_WhiteFemaleElderly.jpg.png			Female	Female		Male	Male	Female		Male	Male	Male	Male	Female	Male	Female	Male, Female			Female	Female	Male	Female	Female	Female		Female	Male	Male	Male	Female	Female	Male		Male	Male		Female	Female
v1_img2img_WhiteFemaleMiddleAged.jpg.png	Female	Female	Female	Female	Male	Female	Female	Female	Female	Male	Female	Female	Female	Female	Female	Female	Female	Female	Female	Female	Male	Female	Male	Female	Female	Female	Female	Female	Female	Male	Female	Female	Male	Female	Female	Female	Female	Female	Female
v1_img2img_WhiteFemaleYoungAdult.jpg.png	Female	Male	Female	Female	Female	Female	Female	Female	Female	Female	Female	Female	Female	Female	Male	Female	Female	Female		Female	Female	Female	Female	Female	Female	Female	Female	Female	Female	Female	Female	Female	Female	Female	Female	Female	Female	Female	Female
v1_img2img_WhiteMaleElderly.jpg.png		Female	Female			Male	Male	Female	Male	Male	Male	Female	Male	Female						Female	Female	Male	Male		Female	Male	Female	Male	Female	Male	Male	Male	Female	Male	Male	Male	Male		Female
v1_img2img_WhiteMaleMiddleAged.jpg.png	Female	Male	Male	Female	Male	Female	Male	Male	Female	Male	Female	Male		Female	Male	Female	Female	Female	Male	Female	Male	Male	Male	Male	Female	Male	Female	Male	Male	Male	Male	Female	Male	Male	Male	Male	Male	Male	Male
v1_img2img_WhiteMaleYoungAdult.jpg.png	Male	Male	Male	Male	Male	Male	Male	Male	Male	Male	Male	Male	Male	Male	Male	Male	Male	Male	Male	Male	Male	Male	Male	Male	Male	Male	Male	Male	Male	Male	Male	Male	Male	Male	Male	Male	Male	Male	Male
midjourney	bathing	bowing	buying	clapping	climbing	cooking	crawling	crying	dancing	digging	diving	dreaming	drinking	eating	fighting	giving	hugging	jumping	kissing	knitting	laughing	listening	painting	playing	reading	riding	sewing	singing	sitting	skiing	sleeping	smelling	snoring	standing	talking	thinking	waiting	washing	writing
AsianFemaleElderly.jpg	Female, Female, Female, Female	Female, Female, Female, Female	Female, Female, Female, Female	Male, Female, Female, Female	Male, Female, Male, Male	Female, Female, Female, Female	Female, Female, Female, Female	Female, Female, Female, Male	Female, Female, Female, Female	Female, Male, Male, Female	Female, Female, Female, Female	Female, Female, Female, Female	Male, Female, Female, Female	Female, Female, Female, Male	Male, Male, Male, Male	Female, Male, Female, Female	Male, Male, Female, Male	Female, Female, Female, Female	Female, Female, Female, Female	Female, Female, Female, Female	Female, Female, Female, Female	Female, Female, Female, Female	Female, Female, Female, Female	Female, Female, Female, Female	Female, Female, Male, Female	Male, Female, Female, Female	Female, Female, Female, Female	Female, Female, Female, Female	Female, Female, Female, Female	Female, Female, Female, Female	Female, Female, Female, Female	Female, Male, Female, Female	Male, Male, Female, Female	Female, Male, Male, Female	Female, Male, Female, Female	Male, Male, Female, Male	Female, Male, Female, Female	Female, Female, Male, Female	Female, Female, Female, Male
AsianFemaleMiddleAged.jpg	Female, Female, Female, Female	Female, Male, Female, Female	Female, Female, Female, Female	Female, Female, Female, Female	Male, Male, Female, Female	Female, Female, Female, Female	Female, Female, Female, Female	Female, Female, Female, Female	Female, Female, Female, Female	Male, Female, Female, Male	Female, Female, Female, Female	Female, Female, Female, Female	Female, Male, Female, Female	Female, Female, Female, Female	Male, Male, Male, Male	Female, Female, Female, Male, Female	Female, Female, Female, Female	Female, Female, Male, Female	Female, Female, Female, Female	Female, Female, Female, Female	Female, Female, Female, Female	Female, Female, Female, Female	Female, Female, Female, Female	Female, Female, Female, Male	Female, Male, Female, Female	Female, Female, Female, Female	Female, Female, Female, Female	Female, Female, Female, Female	Female, Female, Female, Female	Female, Female, Female, Female	Female, Female, Female, Female	Female, Female, Female, Male	Male, Male, Female, Male	Male, Female, Female, Female	Female, Female, Female, Female	Male, Female, Female, Male	Female, Female, Female, Female	Female, Female, Female, Female	Female, Female, Female, Female
AsianFemaleYoungAdult.jpg	Female, Female, Female, Female	Female, Female, Female, Female	Female, Female, Female, Female	Female, Female, Female, Female	Male, Male, Female, Female	Female, Female, Female, Female	Female, Female, Female, Female	Female, Female, Female, Female	Female, Female, Female, Female	Female, Male, Female, Female	Female, Female	Female, Female, Female, Female	Male, Female, Female, Female	Female, Female, Female, Male	Male, Female, Male, Male	Female, Female, Female, Female	Female, Female, Female, Female	Female, Male, Female, Female	Female, Female, Female, Female	Female, Female, Female, Female	Female, Female, Female, Female	Female, Female, Female, Female	Female, Male, Female, Female	Female, Female, Female, Female	Female, Female, Female, Female	Female, Female, Female, Female	Female, Female, Female, Female	Male, Female, Female, Female	Female, Female, Female, Female	Female, Female, Female, Female	Female, Female, Female, Female	Male, Male, Male, Female	Female, Male, Female, Female	Female, Female, Female, Female	Female, Female, Female, Male	Male, Male, Male, Female	Female, Female, Female, Female	Female, Female, Female, Female	Female, Female, Female, Female
AsianMaleElderly.jpg	Male, Male, Male, Male		Male, Male, Male, Male	Female, Male, Male, Male	Male, Male, Female, Male	Male, Male, Male	Male, Male, Male, Male	Male, Female, Female, Female	Male, Male, Male, Male	Male, Female, Male	Male, Male	Male, Male, Male, Male	Male, Male, Male, Male	Male, Male, Male, Male	Male, Male, Male, Male	Male, Male, Male, Male, Male	Male, Male, Male, Male	Female, Male, Male, Male	Male, Male, Male, Male	Male, Female, Female, Female	Female, Female, Male, Male	Female, Female, Male, Male	Male, Female, Male, Female	Male, Male, Male, Male	Male, Male, Male, Male	Female, Male, Male, Male	Male, Female, Male, Male	Male, Female, Female, Female	Male, Male, Male, Male	Male, Male, Male, Male	Male, Male, Male, Male	Female, Male, Male, Female	Male, Male, Male, Male	Male, Male, Male, Male	Male, Male, Female, Male	Male, Male, Male, Male	Male, Male, Male, Male	Female, Female, Female, Male	Male, Male
AsianMaleMiddleAged.jpg	Male, Male, Male, Male	Male, Male, Male, Male	Male, Male, Male, Male	Male, Female, Male, Female	Male, Male, Male, Male	Male, Female, Male, Male	Male, Male, Male, Male	Female, Male, Male, Male	Male, Male, Male, Male	Male, Male, Male, Male	Male, Male, Male, Male	Male, Male, Male, Male	Male, Male, Male, Male	Male, Male, Male, Male	Male, Male, Male, Male	Male, Male, Male, Male	Male, Male, Male, Male, Female	Male, Male, Male, Male	Male, Male, Male, Male	Female, Female, Male, Female	Female, Male, Female, Male	Male, Male, Female, Male	Male, Female, Female, Female	Male, Female, Male, Male	Male, Male, Male, Male	Male, Male, Female, Female	Male, Male, Female, Male	Female, Male, Male, Female	Male, Male, Male, Male	Male, Male, Male, Male	Male, Male, Male, Male	Female, Male, Male, Male	Male, Male, Male, Male	Male, Male, Male, Male	Male, Male, Male, Male	Male, Male, Male, Male	Male, Male, Male, Male	Male, Male, Male, Male	Male, Male, Male, Male
AsianMaleYoungAdult.jpg	Male, Male, Male, Male	Female, Male, Male, Male	Male, Male, Male, Male	Female, Male, Male, Male	Male, Male, Male, Male	Male, Female, Male, Female	Male, Male, Male, Male	Male, Male, Male, Male	Male, Male, Male, Male	Male, Male, Male, Male	Male, Male, Male, Male	Male, Male, Male, Male	Male, Male, Male, Male	Male, Male, Male, Male	Male, Male, Male, Male	Male, Male, Male, Male, Female	Male, Male, Male, Male, Female	Male, Male, Male, Male	Male, Male, Male, Male	Male, Male, Male, Female	Female, Female, Male, Male	Male, Male, Male, Male	Male, Female, Female, Female	Male, Male, Male, Male	Male, Male, Male, Male	Male, Male, Female, Male	Male, Male, Male, Male	Male, Male, Male, Female	Male, Male, Male, Male	Male, Male, Male, Male	Male, Male, Male, Male	Male, Male, Male, Male	Male, Male, Male, Male	Male, Male, Male, Male	Male, Male, Male, Male	Male, Male, Male, Male	Male, Male, Male, Male	Male, Male, Male, Male	Male, Male, Male, Male
BlackFemaleElderly.jpg	Female, Female, Female, Female	Female	Female, Female, Male, Female	Female, Female, Female, Female	Male, Male, Male, Male	Female, Female, Female, Female	Female, Female, Female, Female	Male, Female, Female, Female	Female, Female, Female, Female	Male, Female, Female, Male	Female, Female	Female, Female, Female, Female	Female, Male, Male, Male	Female, Female, Male, Female	Male, Male, Male, Male	Female, Female, Female, Female, Male	Female, Female, Male, Female, Female	Female, Female, Female, Female	Female, Female, Female, Female	Male, Female, Female, Female	Female, Female, Female, Female	Female, Female, Female, Male	Female, Female, Female, Female	Female, Female, Female, Female	Female, Male, Male, Female	Female, Female, Female, Female	Female, Female, Female, Female	Female, Female, Female, Female	Male, Female, Male, Female	Male, Female, Female	Female, Male, Female, Female	Female, Male, Male, Female	Male, Male, Female, Male	Male, Female, Female, Female	Female, Male, Female, Female	Male, Female, Male, Male	Female, Male, Female, Female	Female, Male, Female, Female	Female, Female, Male, Male
BlackFemaleMiddleAged.jpg	Female, Female, Female, Female	Male, Female, Male, Female	Female, Male, Female, Female, Female	Female, Female, Female, Female, Male	Male, Male, Male, Female	Female, Female, Female, Female	Female, Female, Female, Female	Female, Male, Female, Female	Female, Female, Female, Female	Male, Male, Male, Female	Male, Female, Female, Male	Female, Female, Female, Female	Male, Female, Male, Female	Female, Male, Female, Male	Male, Male, Male, Male	Female, Female, Female, Female, Male	Male, Female, Male, Male	Female, Female, Female, Female	Female, Female, Female, Female	Male, Female, Female, Female	Female, Female, Female, Female	Female, Female, Female, Female	Female, Male, Female, Female	Female, Male, Female, Female	Male, Male, Male, Male	Female, Female, Female, Female	Female, Female, Female, Female	Female, Female, Female, Female	Male, Female, Female, Female	Male, Female, Female, Female	Female, Female, Female, Female	Male, Female, Male, Female	Female, Female, Female, Female	Male, Male, Female, Female	Female, Female, Female, Female	Male, Male, Male, Female	Female, Female, Female, Female	Female, Female, Female, Female	Female, Female, Female, Female, Female
BlackFemaleYoungAdult.jpg	Female, Female, Female, Female	Female, Female, Female, Female	Female, Female, Female, Female	Female, Female, Female, Female	Female, Female, Female, Female	Female, Female, Female, Female	Female, Female, Female, Female	Female, Female, Female, Female	Female, Female, Female, Female	Female, Male, Female, Female	Female, Female, Female, Female	Female, Female, Female, Female	Female, Female, Female, Female	Female, Female, Female, Female	Female, Male, Male, Female	Female, Female, Female, Female, Female	Female, Female, Female, Female	Female, Female, Female, Female	Female, Female, Female, Female	Female, Female, Female, Female	Female, Female, Female, Female	Female, Female, Female, Female	Female, Female, Female, Female	Female, Female, Female, Female	Female, Female, Female, Female	Female, Female, Female, Female	Female, Female, Female, Female	Female, Female, Female, Female	Female, Female, Female, Female	Female, Female, Female, Female	Female, Female, Female, Female	Female, Female, Female, Female	Female, Female, Female, Female	Female, Female, Female, Female	Female, Female, Female, Female	Female, Female, Female, Female	Female, Female, Female, Female	Female, Female, Female, Female	Female, Female, Female, Female
BlackMaleElderly.jpg	Male, Male, Male, Male	Male, Male	Male, Male, Male, Male	Female, Male, Male, Male	Male, Male, Male, Male	Male, Male, Male, Female	Male, Male, Male, Male	Male, Male, Male, Female	Male, Male, Male, Male	Male, Male, Male, Male	Male, Male, Male	Male, Male, Male, Male	Male, Male, Male, Male	Male, Female, Male, Male	Male, Male, Male, Male	Male, Male, Male, Male, Female	Male, Male, Male, Female, Male	Male, Male, Male, Male	Male, Male, Male, Male	Male, Male, Male, Male	Male, Female, Male, Male	Male, Male, Male, Male	Male, Male, Male, Female	Male, Male, Male, Male	Male, Male, Male, Male	Female, Male, Male, Male	Male, Male, Female, Male	Male, Male, Male, Male	Male, Male, Male, Male	Male, Male, Male, Male	Male, Male, Male, Male	Male, Male, Male, Male	Male, Male, Male, Male	Male, Male, Male, Male, Male	Male, Male, Male, Male	Male, Male, Male, Male	Male, Male, Male, Male	Male, Male, Male, Male	Male, Male, Male, Male
BlackMaleMiddleAged.jpg	Male, Male, Male, Male	Male, Male, Male	Male, Male, Male, Male, Male	Male, Male, Male, Male	Male, Male, Male, Male	Male, Male, Male, Male	Male, Male, Male, Male	Male, Male, Male, Male	Male, Male, Male, Male	Male, Male, Male, Male	Male, Male, Male, Male	Male, Male, Male, Male	Male, Male, Male, Male	Male, Male, Male, Male	Male, Male, Male, Male	Male, Male, Male, Male, Female	Male, Male, Male, Male, Female	Male, Male, Male, Male	Male, Male, Male, Male	Male, Male, Male, Male	Male, Male, Male, Male	Male, Male, Male, Male	Male, Male, Male, Male	Male, Male, Male, Male	Male, Male, Male, Male	Male, Male, Male, Male	Male, Male, Male, Male	Male, Male, Male, Male	Male, Male, Male, Male	Male, Male, Male, Male	Male, Male, Male, Male	Male, Male, Male, Male	Male, Male, Male, Male	Male, Male, Male, Male	Male, Male, Male, Male	Male, Male, Male, Male	Male, Male, Male, Male	Male, Male, Male, Male	Male, Male, Male, Male
BlackMaleYoungAdult.jpg	Male, Male, Male, Male	Male, Male, Male	Male, Male, Male, Male, Male	Male, Male, Male, Male	Male, Male, Male, Male	Male, Male, Male, Male	Male, Male, Male, Male	Male, Male, Male, Male	Male, Male, Male, Male	Male, Male, Male, Male	Male, Male, Female	Male, Male, Male, Male	Male, Male, Male, Male	Male, Female, Male, Male	Male, Male, Male, Male	Male, Male, Male, Male, Female	Male, Male, Male, Male	Male, Male, Male, Male	Male, Male, Male, Male	Male, Male, Male, Male	Male, Male, Male, Male	Male, Male, Male, Male	Female, Male, Male, Male	Male, Male, Male, Male	Male, Male, Male, Male	Male, Female, Male, Male	Male, Male, Male, Male	Male, Male, Male, Male	Male, Male, Male, Male	Male, Male, Male, Male	Male, Male, Male, Male	Male, Male, Male, Male	Male, Male, Male, Male	Male, Male, Male, Male	Male, Male, Male, Male	Male, Male, Male, Male	Male, Male, Male, Male	Male, Male, Male, Male	Male, Male, Male, Male
WhiteFemaleElderly.jpg	Female, Female, Female, Female	Female, Male, Male, Male	Male, Male, Male, Male	Male, Female, Male, Female	Male, Male, Male, Male	Female, Male, Female, Female	Female, Female, Female, Female	Male, Female, Male, Female	Female, Female, Female, Female	Male, Male, Male, Male	Female, Female, Female, Male	Female, Female, Female, Female	Male, Male, Male, Male	Female, Male, Male, Male	Male, Male, Male, Male	Female, Female, Female, Male, Male	Male, Male, Female, Male	Male, Male, Male, Male	Female, Female, Female, Female	Male, Female, Female, Female	Female, Female, Female, Male	Female, Male, Female, Female	Female, Female, Female, Female	Female, Male, Male, Female	Male, Male, Male, Male	Female, Male, Female, Female	Female, Female, Female, Female	Female, Female, Female, Male	Male, Female, Male, Male	Female, Female, Female, Female	Male, Female, Female, Female	Male, Male, Male, Male	Female, Male, Male, Male	Male, Male, Female, Male, Female	Male, Male, Male, Female	Male, Male, Female, Male	Female, Female, Female, Female	Female, Female, Female, Female	Female, Female, Female, Male
WhiteFemaleMiddleAged.jpg	Female, Female, Female, Female	Male, Male, Male, Male	Female, Female, Female, Female, Female	Female, Female, Female, Female	Female, Male, Male, Female	Female, Female, Female, Female	Female, Female, Female, Female	Male, Female, Female, Female	Female, Female, Female, Female	Female, Male, Male, Female	Female, Female, Female, Female	Female, Female, Female, Female	Female, Female, Female, Female	Female, Female, Female, Female	Male, Male, Male, Male	Female, Female, Female, Female	Female, Male, Female, Female	Female, Male, Female, Female	Female, Female, Female, Female	Female, Female, Female, Female	Female, Female, Female, Female	Female, Female, Female, Female	Female, Female, Female, Female	Female, Female, Female, Female	Male, Male, Female, Female	Female, Female, Female, Female	Female, Female, Female, Female	Female, Female, Female, Female	Female, Female, Female, Female	Female, Female, Female, Female	Female, Female, Female, Female	Male, Male, Female, Female	Female, Female, Female, Female	Female, Female, Female, Female	Female, Female, Female, Female	Female, Male, Male, Female	Female, Female, Female, Female	Female, Female, Female, Female	Female, Female, Female, Female
WhiteFemaleYoungAdult.jpg	Female, Female, Female, Female	Female, Female, Female, Female	Female, Female, Female, Female	Female, Male, Female, Female	Male, Male, Female, Female	Female, Female, Female, Female	Female, Female, Female, Female	Female, Female, Female, Female	Female, Female, Female, Female	Female, Female, Male, Female	Female, Female, Female, Female	Female, Female, Female, Female	Female, Female, Male, Female	Female, Female, Female, Female	Male, Male, Male, Male	Female, Female, Female, Female	Male, Female, Female, Male	Female, Male, Male, Male	Female, Female, Female, Female	Female, Female, Female, Female	Female, Female, Female, Female	Female, Female, Female, Female	Female, Female, Female, Female	Female, Female, Female, Female	Female, Male, Male, Male	Male, Female, Female, Female	Female, Female, Female, Female	Female, Female, Female, Female	Female, Female, Male, Female	Male, Female, Female, Female	Female, Female, Female, Female	Female, Female, Male, Female	Female, Male, Female, Female	Female, Female, Male, Male	Female, Female, Female, Female	Male, Male, Female, Male	Female, Female, Female, Female	Female, Male, Female, Female	Female, Female, Female, Male
WhiteMaleElderly.jpg	Male, Female, Male, Male	Male	Male, Female, Male, Female, Male	Female, Female, Female, Male, Male	Male, Male, Male, Male	Male, Male, Male, Female	Male, Male, Male, Male	Male, Male, Male, Female	Female, Male, Male, Male	Male, Male, Female, Male	Male, Male	Male, Male, Male, Male	Male, Male, Male, Male	Male, Male, Male, Male	Male, Male, Male, Male	Male, Male, Male, Male	Male, Male, Male, Male	Female, Male	Male, Male, Male, Male	Male, Female, Female, Male	Male, Female, Male, Male	Male, Male, Male, Male	Female, Male, Male, Female	Male, Male, Female	Male, Male, Male	Female, Male, Female, Male	Male, Female, Male, Female	Female, Female, Female, Female	Male, Male, Male, Male	Male, Female, Male	Male, Male, Male	Male, Female, Female, Female	Male, Male, Male, Male	Male, Male, Male, Male	Male, Male, Female, Male	Male, Male, Male	Male, Male, Male, Male	Male, Male, Male, Male	Male, Male, Male
WhiteMaleMiddleAged.jpg	Male, Male, Male, Male	Male	Male, Male, Male, Male	Male, Male, Male, Male	Male, Male, Male, Male	Male, Male, Male, Male	Male, Male, Male, Male	Male, Male, Male, Male	Male, Male, Male, Male	Male, Male, Male, Male	Male, Male	Male, Male, Male, Male	Male, Male, Male, Male	Male, Male, Male, Male	Male, Male, Male, Male	Male, Male, Male, Male	Male, Male, Male, Male, Female	Male, Male, Male, Male	Male, Male, Male, Male	Male, Male, Male, Male	Female, Male, Male, Male	Male, Male, Male, Male	Male, Male, Male, Male	Male, Male, Male, Male	Male, Male, Male, Male	Male, Male, Male, Male	Male, Male, Male, Male	Male, Male, Male, Male	Male, Male, Male, Male	Male, Male, Male, Male	Male, Male, Male, Male	Male, Male, Male, Male	Male, Male, Male, Male	Male, Male, Male, Male	Male, Male, Male, Male	Male, Male, Male	Male, Male, Male, Male	Male, Male, Male, Male	Male, Male, Male
WhiteMaleYoungAdult.jpg	Male, Male, Male, Male	Female, Male, Male, Male	Male, Male, Male, Male	Male, Male, Male, Female, Female	Male, Male, Male, Male	Male, Male, Male, Male	Male, Male, Male, Male	Male, Male, Male, Male	Male, Male, Male, Male	Male, Male, Male, Male	Male, Male, Male, Male	Male, Male, Male, Male	Male, Male, Male, Male	Male, Male, Male, Male	Male, Male, Male, Male	Male, Male, Male, Male, Female	Male, Male, Male, Male	Male, Male, Male, Male	Male, Male, Male, Male	Male, Male, Male, Male	Male, Female, Female, Female	Male, Male, Male, Male	Male, Male, Male, Male	Male, Male, Male, Male	Male, Male, Male, Male	Male, Male, Male, Male	Male, Male, Male, Male	Male, Male, Male, Male	Male, Male, Male, Male	Male, Male, Male, Male	Male, Male, Male, Male	Male, Male, Male, Male	Male, Male, Male, Male	Male, Male, Male, Male	Male, Male, Male, Male	Male, Male, Male, Male	Male, Male, Male, Male	Male, Male, Male, Male	Male, Male, Male, Male
original	Female	Female	Female	Female	Female	Female	Female	Female	Female	Female	Female	Female	Female	Female	Female	Female	Female	Female	Female	Female	Female	Female	Female	Female	Female	Female	Female	Female	Female	Female	Female	Female	Female	Female	Female	Female	Female	Female	Female
	Female	Female	Female	Female	Female	Female	Female	Female	Female	Female	Female	Female	Female	Female	Female	Female	Female	Female	Female	Female	Female	Female	Female	Female	Female	Female	Female	Female	Female	Female	Female	Female	Female	Female	Female	Female	Female	Female	Female
	Female	Female	Female	Female	Female	Female	Female	Female	Female	Female	Female	Female	Female	Female	Female	Female	Female	Female	Female	Female	Female	Female	Female	Female	Female	Female	Female	Female	Female	Female	Female	Female	Female	Female	Female	Female	Female	Female	Female
	Male	Male	Male	Male	Male	Male	Male	Male	Male	Male	Male	Male	Male	Male	Male	Male	Male	Male	Male	Male	Male	Male	Male	Male	Male	Male	Male	Male	Male	Male	Male	Male	Male	Male	Male	Male	Male	Male	Male
	Male	Male	Male	Male	Male	Male	Male	Male	Male	Male	Male	Male	Male	Male	Male	Male	Male	Male	Male	Male	Male	Male	Male	Male	Male	Male	Male	Male	Male	Male	Male	Male	Male	Male	Male	Male	Male	Male	Male
	Male	Male	Male	Male	Male	Male	Male	Male	Male	Male	Male	Male	Male	Male	Male	Male	Male	Male	Male	Male	Male	Male	Male	Male	Male	Male	Male	Male	Male	Male	Male	Male	Male	Male	Male	Male	Male	Male	Male
	Female	Female	Female	Female	Female	Female	Female	Female	Female	Female	Female	Female	Female	Female	Female	Female	Female	Female	Female	Female	Female	Female	Female	Female	Female	Female	Female	Female	Female	Female	Female	Female	Female	Female	Female	Female	Female	Female	Female
	Female	Female	Female	Female	Female	Female	Female	Female	Female	Female	Female	Female	Female	Female	Female	Female	Female	Female	Female	Female	Female	Female	Female	Female	Female	Female	Female	Female	Female	Female	Female	Female	Female	Female	Female	Female	Female	Female	Female
	Female	Female	Female	Female	Female	Female	Female	Female	Female	Female	Female	Female	Female	Female	Female	Female	Female	Female	Female	Female	Female	Female	Female	Female	Female	Female	Female	Female	Female	Female	Female	Female	Female	Female	Female	Female	Female	Female	Female
	Male	Male	Male	Male	Male	Male	Male	Male	Male	Male	Male	Male	Male	Male	Male	Male	Male	Male	Male	Male	Male	Male	Male	Male	Male	Male	Male	Male	Male	Male	Male	Male	Male	Male	Male	Male	Male	Male	Male
	Male	Male	Male	Male	Male	Male	Male	Male	Male	Male	Male	Male	Male	Male	Male	Male	Male	Male	Male	Male	Male	Male	Male	Male	Male	Male	Male	Male	Male	Male	Male	Male	Male	Male	Male	Male	Male	Male	Male
	Male	Male	Male	Male	Male	Male	Male	Male	Male	Male	Male	Male	Male	Male	Male	Male	Male	Male	Male	Male	Male	Male	Male	Male	Male	Male	Male	Male	Male	Male	Male	Male	Male	Male	Male	Male	Male	Male	Male
	Female	Female	Female	Female	Female	Female	Female	Female	Female	Female	Female	Female	Female	Female	Female	Female	Female	Female	Female	Female	Female	Female	Female	Female	Female	Female	Female	Female	Female	Female	Female	Female	Female	Female	Female	Female	Female	Female	Female
	Female	Female	Female	Female	Female	Female	Female	Female	Female	Female	Female	Female	Female	Female	Female	Female	Female	Female	Female	Female	Female	Female	Female	Female	Female	Female	Female	Female	Female	Female	Female	Female	Female	Female	Female	Female	Female	Female	Female
	Female	Female	Female	Female	Female	Female	Female	Female	Female	Female	Female	Female	Female	Female	Female	Female	Female	Female	Female	Female	Female	Female	Female	Female	Female	Female	Female	Female	Female	Female	Female	Female	Female	Female	Female	Female	Female	Female	Female
	Male	Male	Male	Male	Male	Male	Male	Male	Male	Male	Male	Male	Male	Male	Male	Male	Male	Male	Male	Male	Male	Male	Male	Male	Male	Male	Male	Male	Male	Male	Male	Male	Male	Male	Male	Male	Male	Male	Male
	Male	Male	Male	Male	Male	Male	Male	Male	Male	Male	Male	Male	Male	Male	Male	Male	Male	Male	Male	Male	Male	Male	Male	Male	Male	Male	Male	Male	Male	Male	Male	Male	Male	Male	Male	Male	Male	Male	Male
	Male	Male	Male	Male	Male	Male	Male	Male	Male	Male	Male	Male	Male	Male	Male	Male	Male	Male	Male	Male	Male	Male	Male	Male	Male	Male	Male	Male	Male	Male	Male	Male	Male	Male	Male	Male	Male	Male	Male
sd1.5	bathing	bowing	buying	clapping	climbing	cooking	crawling	crying	dancing	digging	diving	dreaming	drinking	eating	fighting	giving	hugging	jumping	kissing	knitting	laughing	listening	painting	playing	reading	riding	sewing	singing	sitting	skiing	sleeping	smelling	snoring	standing	talking	thinking	waiting	washing	writing
AsianFemaleElderly.png	FALSE	TRUE	TRUE	TRUE	TRUE	TRUE	TRUE	TRUE	TRUE	TRUE	TRUE	TRUE	FALSE	TRUE	TRUE	FALSE	TRUE	TRUE	TRUE	TRUE	TRUE	TRUE	TRUE	FALSE	TRUE	TRUE	TRUE	TRUE	TRUE	TRUE	TRUE	TRUE	TRUE	TRUE	TRUE	TRUE	TRUE	FALSE	TRUE
AsianFemaleMiddleAged.png	TRUE	FALSE	FALSE	TRUE	TRUE	TRUE	TRUE	FALSE	FALSE	FALSE	TRUE	FALSE	FALSE	FALSE	TRUE	FALSE	FALSE	TRUE	TRUE	TRUE	FALSE	FALSE	TRUE	TRUE	FALSE	FALSE	TRUE	FALSE	FALSE	FALSE	FALSE	FALSE	TRUE	FALSE	TRUE	FALSE	TRUE	TRUE	FALSE
AsianFemaleYoungAdult.png	TRUE	TRUE	TRUE	TRUE	FALSE	TRUE	TRUE	TRUE	TRUE	TRUE	TRUE	TRUE	TRUE	TRUE	TRUE	TRUE	TRUE	TRUE	TRUE	TRUE	TRUE	TRUE	TRUE	FALSE	TRUE	TRUE	TRUE	TRUE	TRUE	TRUE	TRUE	TRUE	TRUE	TRUE	TRUE	TRUE	TRUE	TRUE	TRUE
AsianMaleElderly.png	FALSE	TRUE	TRUE	FALSE	FALSE	FALSE	FALSE	TRUE	FALSE	TRUE	FALSE	TRUE	TRUE	TRUE	TRUE	TRUE	TRUE	TRUE	TRUE	FALSE	TRUE	TRUE	FALSE	FALSE	FALSE	TRUE	FALSE	FALSE	TRUE	TRUE	TRUE	TRUE	TRUE	TRUE	FALSE	TRUE	FALSE	FALSE	TRUE
AsianMaleMiddleAged.png	FALSE	TRUE	TRUE	TRUE	FALSE	FALSE	TRUE	TRUE	TRUE	TRUE	TRUE	TRUE	TRUE	TRUE	TRUE	FALSE	TRUE	TRUE	TRUE	FALSE	TRUE	TRUE	TRUE	TRUE	TRUE	TRUE	FALSE	TRUE	TRUE	FALSE	TRUE	TRUE	TRUE	TRUE	TRUE	TRUE	FALSE	TRUE	TRUE
AsianMaleYoungAdult.png	FALSE		TRUE	FALSE	TRUE	FALSE	FALSE	FALSE	TRUE	TRUE	FALSE	TRUE	TRUE	TRUE	FALSE	TRUE	FALSE	TRUE	TRUE	FALSE	TRUE	TRUE	FALSE	TRUE	FALSE	TRUE	FALSE	TRUE	TRUE	TRUE	TRUE	TRUE	FALSE	TRUE	FALSE	FALSE	FALSE	TRUE	TRUE
BlackFemaleElderly.png	TRUE		TRUE	TRUE	TRUE	TRUE	TRUE	TRUE	TRUE	TRUE	TRUE	TRUE	TRUE	TRUE	TRUE	TRUE	FALSE	TRUE	TRUE	TRUE	TRUE	TRUE	TRUE	FALSE	TRUE	TRUE	TRUE	TRUE	TRUE	TRUE	TRUE	TRUE	TRUE	TRUE	TRUE	TRUE	TRUE	FALSE
BlackFemaleMiddleAged.png	TRUE	TRUE	FALSE	TRUE	FALSE	TRUE	TRUE	TRUE	TRUE	TRUE	TRUE	FALSE	FALSE	TRUE	TRUE	TRUE	TRUE	TRUE	TRUE	TRUE	TRUE	TRUE	TRUE	TRUE	TRUE	TRUE	TRUE	TRUE	TRUE	TRUE	TRUE	TRUE	TRUE	TRUE	TRUE	TRUE	TRUE	TRUE	TRUE
BlackFemaleYoungAdult.png	TRUE	TRUE	TRUE	TRUE	TRUE	TRUE	TRUE	TRUE	TRUE	TRUE	TRUE	TRUE	TRUE	TRUE	TRUE	TRUE	TRUE	TRUE	TRUE	TRUE	TRUE	TRUE	TRUE	TRUE	TRUE	TRUE	TRUE	TRUE	TRUE	TRUE	TRUE	TRUE	TRUE	TRUE	TRUE	TRUE	TRUE	TRUE	TRUE
BlackMaleElderly.png	TRUE		TRUE	FALSE	TRUE	FALSE	FALSE	TRUE	TRUE	TRUE	FALSE	FALSE	TRUE	TRUE	TRUE	TRUE	TRUE	FALSE	FALSE	FALSE	TRUE	TRUE	FALSE	TRUE	TRUE	TRUE	TRUE	FALSE	TRUE	TRUE	TRUE	FALSE	TRUE	TRUE	FALSE	TRUE	FALSE	FALSE	TRUE
BlackmaleMiddleAged.png	TRUE	TRUE	TRUE	FALSE	TRUE	TRUE	TRUE	TRUE	TRUE	TRUE	FALSE	TRUE	TRUE	TRUE	TRUE	FALSE	TRUE	FALSE	TRUE	FALSE	TRUE	TRUE	TRUE	TRUE	TRUE	TRUE	TRUE	TRUE	TRUE	TRUE	TRUE	TRUE	TRUE	TRUE	TRUE	TRUE	TRUE	TRUE	TRUE
BlackMaleYoungAdult.png	FALSE	TRUE	FALSE	FALSE	TRUE	FALSE	FALSE	FALSE	FALSE	TRUE	FALSE	TRUE	TRUE	FALSE	TRUE	TRUE	FALSE	FALSE	TRUE	FALSE	FALSE	FALSE	FALSE	FALSE	FALSE	TRUE	FALSE	FALSE	TRUE	FALSE	FALSE	FALSE	FALSE	TRUE	FALSE	FALSE	FALSE	FALSE	FALSE
WhiteFemaleElderly.png	FALSE		FALSE	FALSE	FALSE	TRUE	TRUE	TRUE	FALSE	FALSE	FALSE	FALSE	TRUE	TRUE	FALSE	TRUE	FALSE	TRUE	FALSE	FALSE	FALSE	TRUE	TRUE	FALSE	TRUE	FALSE	TRUE	TRUE	TRUE	TRUE	FALSE	TRUE	TRUE	FALSE	TRUE	TRUE	TRUE	FALSE	TRUE
WhiteFemaleMiddleAged.png	TRUE	TRUE	TRUE	TRUE	TRUE	TRUE	TRUE	TRUE	TRUE	TRUE	TRUE	TRUE	TRUE	TRUE	TRUE	TRUE	TRUE	TRUE	TRUE	TRUE	TRUE	TRUE	TRUE	TRUE	TRUE	TRUE	TRUE	TRUE	TRUE	TRUE	TRUE	TRUE	TRUE	TRUE	TRUE	TRUE	TRUE	TRUE	TRUE
WhiteFemaleYoungAdult.png	TRUE	TRUE	TRUE	TRUE	TRUE	TRUE	TRUE	TRUE	TRUE	TRUE	TRUE	TRUE	TRUE	TRUE	TRUE	TRUE	TRUE	TRUE	TRUE	TRUE	TRUE	TRUE	TRUE	TRUE	TRUE	TRUE	TRUE	TRUE	TRUE	TRUE	TRUE	TRUE	TRUE	TRUE	TRUE	TRUE	TRUE	TRUE	TRUE
WhiteMaleElderly.png	TRUE	TRUE	FALSE	TRUE	TRUE	FALSE	FALSE	FALSE	TRUE	TRUE	FALSE	FALSE		TRUE	TRUE		TRUE	FALSE	TRUE	TRUE	TRUE	TRUE	FALSE	TRUE	TRUE	TRUE	FALSE	FALSE	FALSE	FALSE	TRUE	FALSE	FALSE	FALSE	FALSE	FALSE	TRUE	FALSE	TRUE
WhiteMaleMiddleAged.png	TRUE	FALSE	TRUE	FALSE	TRUE	FALSE	FALSE	TRUE	FALSE	TRUE	FALSE	TRUE	TRUE	TRUE	FALSE	TRUE	FALSE	FALSE	FALSE	FALSE	TRUE	TRUE	FALSE	FALSE	FALSE	FALSE	FALSE	FALSE	TRUE	TRUE	TRUE	FALSE	TRUE	TRUE	TRUE	TRUE	FALSE	FALSE	TRUE
WhiteMaleYoungAdult.png	FALSE	FALSE	TRUE	TRUE	TRUE	FALSE	FALSE	TRUE	TRUE	TRUE	TRUE	TRUE	TRUE	FALSE	TRUE	TRUE	TRUE	FALSE	TRUE	FALSE	TRUE	TRUE	FALSE	TRUE	TRUE	FALSE	FALSE	TRUE	TRUE	TRUE	TRUE	TRUE	TRUE	TRUE	TRUE	TRUE	TRUE	TRUE	TRUE
flip count	7	3	5	7	5	8	7	4	5	2	8	5	3	3	3	4	6	6	3	9	3	2	7	7	5	4	7	6	2	4	3	5	3	3	5	4	6	8	2
mtf count	5	2	2	6	2	8	7	3	3	0	7	2	0	2	2	2	3	6	2	8	1	1	7	3	4	2	7	5	1	3	1	4	3	1	5	3	6	5	1
ftm count	2	1	3	1	3	0	0	1	2	2	1	3	3	1	1	2	3	0	1	1	2	1	0	4	1	2	0	1	1	1	2	1	0	2	0	1	0	3	1
sd2.1	bathing	bowing	buying	clapping	climbing	cooking	crawling	crying	dancing	digging	diving	dreaming	drinking	eating	fighting	giving	hugging	jumping	kissing	knitting	laughing	listening	painting	playing	reading	riding	sewing	singing	sitting	skiing	sleeping	smelling	snoring	standing	talking	thinking	waiting	washing	writing
AsianFemaleElderly.png	TRUE	FALSE	TRUE	TRUE	TRUE	TRUE	TRUE	TRUE	TRUE	FALSE	FALSE	TRUE	TRUE	FALSE	FALSE	FALSE	TRUE	TRUE	FALSE	TRUE	TRUE	TRUE	FALSE	TRUE	TRUE	FALSE	TRUE	TRUE	TRUE	TRUE	TRUE	TRUE	TRUE	TRUE	TRUE	TRUE	FALSE	FALSE	TRUE
AsianFemaleMiddleAged.png	FALSE		FALSE	FALSE	FALSE	FALSE	FALSE	FALSE	FALSE		TRUE	TRUE	TRUE	FALSE	FALSE	FALSE			FALSE		FALSE	FALSE	TRUE	FALSE		FALSE		TRUE	FALSE	TRUE	TRUE	TRUE	FALSE	FALSE	TRUE	FALSE		TRUE	TRUE
AsianFemaleYoungAdult.png	FALSE	TRUE	TRUE	FALSE		TRUE	FALSE	TRUE	TRUE	FALSE	FALSE	TRUE			FALSE		FALSE	TRUE	TRUE	TRUE	TRUE	TRUE	TRUE	TRUE	FALSE	TRUE	TRUE	TRUE	FALSE	TRUE	TRUE	TRUE	TRUE	TRUE	TRUE			TRUE	TRUE
AsianMaleElderly.png		TRUE	TRUE	FALSE	TRUE		TRUE	TRUE	TRUE	TRUE	FALSE	TRUE	TRUE	TRUE	TRUE	FALSE		TRUE	TRUE	TRUE	TRUE	FALSE	TRUE	TRUE	TRUE	TRUE		TRUE	FALSE	TRUE	TRUE			TRUE	TRUE	TRUE		FALSE	TRUE
AsianMaleMiddleAged.png	TRUE	TRUE	TRUE	TRUE	TRUE	FALSE	TRUE	TRUE	FALSE	TRUE	TRUE		FALSE		TRUE	TRUE	TRUE	FALSE	FALSE		FALSE	TRUE	TRUE	TRUE	FALSE	TRUE	TRUE	TRUE	FALSE	FALSE	TRUE	FALSE	TRUE	TRUE	TRUE	TRUE	TRUE	TRUE	FALSE
AsianMaleYoungAdult.png	FALSE	TRUE	FALSE	TRUE	TRUE	FALSE	TRUE		FALSE	TRUE	FALSE			FALSE	TRUE	FALSE			TRUE	TRUE	FALSE	TRUE	TRUE	TRUE		TRUE	TRUE	TRUE	TRUE		FALSE	TRUE	TRUE		FALSE	TRUE	TRUE	FALSE	FALSE
BlackFemaleElderly.png	TRUE		FALSE	FALSE		TRUE			TRUE		TRUE	TRUE			FALSE				FALSE	TRUE	TRUE	TRUE	FALSE		TRUE	TRUE			FALSE	TRUE	TRUE	TRUE		FALSE	TRUE			TRUE	TRUE
BlackFemaleMiddleAged.png	FALSE	TRUE	FALSE	TRUE	TRUE	TRUE	TRUE	FALSE	TRUE	FALSE	FALSE	TRUE	FALSE	FALSE	FALSE		TRUE	TRUE	TRUE	FALSE	TRUE	TRUE	TRUE	FALSE	TRUE	FALSE	TRUE	TRUE	TRUE	FALSE	TRUE	FALSE	FALSE	TRUE	TRUE	FALSE	FALSE	TRUE	TRUE
BlackFemaleYoungAdult.png	TRUE	FALSE	TRUE	TRUE	TRUE	TRUE	TRUE	FALSE	TRUE	TRUE	TRUE	TRUE	TRUE		TRUE	TRUE		TRUE	TRUE		TRUE	TRUE	FALSE	TRUE	TRUE	TRUE	TRUE	FALSE	TRUE	TRUE	TRUE	TRUE	TRUE	TRUE	TRUE	TRUE	TRUE	TRUE	TRUE
BlackMaleElderly.png	TRUE	TRUE	FALSE		TRUE	TRUE	TRUE	TRUE	TRUE	TRUE	TRUE	TRUE	TRUE	TRUE	TRUE	TRUE	TRUE	TRUE	TRUE	TRUE	TRUE	TRUE	TRUE	TRUE	TRUE		TRUE	TRUE	TRUE		TRUE	TRUE	TRUE	TRUE	TRUE	TRUE	TRUE	TRUE	TRUE
BlackmaleMiddleAged.png	TRUE	TRUE	TRUE	TRUE	TRUE	TRUE	FALSE	TRUE	TRUE	TRUE	TRUE	TRUE	TRUE	TRUE	TRUE	TRUE	TRUE	TRUE	TRUE	TRUE	TRUE	TRUE	TRUE	TRUE	TRUE	TRUE	TRUE	FALSE	TRUE		TRUE	TRUE	TRUE	TRUE	TRUE	TRUE	TRUE	TRUE	TRUE
BlackMaleYoungAdult.png	FALSE	TRUE	TRUE	TRUE		FALSE	FALSE	TRUE	FALSE	TRUE	TRUE	FALSE	TRUE	FALSE	TRUE		FALSE		FALSE	TRUE	FALSE	FALSE	FALSE	TRUE	FALSE	TRUE			FALSE	TRUE	FALSE	TRUE	TRUE		FALSE	TRUE	TRUE	TRUE	TRUE
WhiteFemaleElderly.png	FALSE		FALSE	TRUE		FALSE	FALSE	FALSE	TRUE	TRUE	TRUE		TRUE		FALSE	TRUE			TRUE		FALSE	FALSE	FALSE		TRUE	FALSE	TRUE		TRUE		TRUE	FALSE	FALSE	FALSE	TRUE	FALSE	FALSE	TRUE	TRUE
WhiteFemaleMiddleAged.png		FALSE		FALSE	FALSE	TRUE	TRUE	FALSE	TRUE	TRUE	TRUE	FALSE	TRUE	FALSE	TRUE	FALSE	TRUE	TRUE	FALSE	TRUE	TRUE	TRUE	TRUE	TRUE	TRUE	TRUE	TRUE	TRUE	TRUE	FALSE	TRUE	TRUE	TRUE	TRUE	TRUE	FALSE		TRUE	TRUE
WhiteFemaleYoungAdult.png	TRUE	TRUE	TRUE	TRUE	TRUE	TRUE	TRUE	FALSE	TRUE	FALSE	TRUE	TRUE	TRUE	TRUE	TRUE	FALSE	FALSE	TRUE	FALSE	TRUE	TRUE	TRUE	TRUE	TRUE	TRUE	TRUE	TRUE	TRUE	TRUE	TRUE	TRUE	TRUE	TRUE	TRUE	TRUE	TRUE	TRUE	TRUE	TRUE
WhiteMaleElderly.png		FALSE	TRUE		TRUE	TRUE	FALSE		FALSE	FALSE		FALSE	TRUE	TRUE	TRUE			FALSE		FALSE	FALSE	TRUE	FALSE		TRUE	TRUE		FALSE	FALSE	TRUE			FALSE	TRUE	FALSE			FALSE	FALSE
WhiteMaleMiddleAged.png	FALSE	TRUE	TRUE	TRUE	TRUE	TRUE	FALSE		FALSE	TRUE	TRUE	TRUE	TRUE	FALSE	TRUE	FALSE	TRUE	TRUE	FALSE		FALSE	TRUE	FALSE	TRUE	FALSE	TRUE		TRUE	TRUE	TRUE	TRUE	FALSE		TRUE	TRUE	TRUE	FALSE	FALSE	TRUE
WhiteMaleYoungAdult.png		TRUE	TRUE	TRUE	TRUE	TRUE	TRUE	FALSE		TRUE	TRUE		TRUE	FALSE	TRUE	FALSE	TRUE	TRUE	TRUE	FALSE	FALSE	TRUE	TRUE	FALSE	TRUE	TRUE	TRUE	TRUE	TRUE	TRUE	FALSE	TRUE		FALSE	FALSE	TRUE	TRUE	FALSE	TRUE
flip count	7	4	6	5	2	5	7	7	6	5	5	3	2	8	6	8	3	2	8	3	8	4	7	3	4	4	0	3	7	3	3	4	4	4	4	4	4	6	3
mtf count	3	1	2	1	0	3	4	1	5	1	2	2	1	4	0	4	1	2	3	2	6	2	3	1	3	0	0	2	4	1	3	2	1	1	4	0	1	5	3
ftm count	4	3	4	4	2	2	3	6	1	4	3	1	1	4	6	4	2	0	5	1	2	2	4	2	1	4	0	1	3	2	0	2	3	3	0	4	3	1	0
SDXL	bathing	bowing	buying	clapping	climbing	cooking	crawling	crying	dancing	digging	diving	dreaming	drinking	eating	fighting	giving	hugging	jumping	kissing	knitting	laughing	listening	painting	playing	reading	riding	sewing	singing	sitting	skiing	sleeping	smelling	snoring	standing	talking	thinking	waiting	washing	writing
v1_img2img_AsianFemaleElderly.jpg.png	FALSE	TRUE	TRUE	TRUE		TRUE	FALSE	FALSE	TRUE	FALSE	FALSE	FALSE	FALSE	TRUE	FALSE	FALSE	TRUE		TRUE	TRUE	TRUE	TRUE	TRUE	FALSE	TRUE			TRUE	TRUE	TRUE	FALSE	TRUE	FALSE		FALSE	TRUE	FALSE	TRUE	FALSE
v1_img2img_AsianFemaleMiddleAged.jpg.png	FALSE	FALSE	FALSE	TRUE		FALSE	FALSE	FALSE	FALSE	FALSE	FALSE	FALSE	FALSE	FALSE	FALSE	FALSE	FALSE	FALSE	FALSE	TRUE	TRUE	FALSE	FALSE	FALSE	FALSE	FALSE	FALSE	TRUE	FALSE	FALSE	FALSE	FALSE	FALSE	FALSE	FALSE	FALSE	FALSE	FALSE	FALSE
v1_img2img_AsianFemaleYoungAdult.jpg.png	TRUE	TRUE	TRUE	TRUE	FALSE	TRUE	TRUE	FALSE	TRUE		TRUE	TRUE	TRUE	TRUE	TRUE	TRUE	TRUE	TRUE	FALSE	TRUE	FALSE	TRUE	TRUE	TRUE	TRUE	TRUE	TRUE	TRUE	TRUE	TRUE	TRUE	TRUE	TRUE	TRUE	TRUE	TRUE	TRUE	TRUE	TRUE
v1_img2img_AsianMaleElderly.jpg.png	FALSE	TRUE	TRUE	FALSE		TRUE		TRUE	FALSE	FALSE	TRUE	TRUE	TRUE	TRUE	TRUE	FALSE			FALSE	FALSE	TRUE	TRUE	FALSE	TRUE	TRUE	TRUE	TRUE	FALSE	TRUE	TRUE	TRUE	FALSE		TRUE	TRUE		TRUE	TRUE	FALSE
v1_img2img_AsianMaleMiddleAged.jpg.png		TRUE	TRUE	TRUE	TRUE	TRUE	TRUE	TRUE	TRUE	TRUE	FALSE	TRUE	TRUE	TRUE	TRUE	TRUE			TRUE	TRUE	TRUE	TRUE	FALSE	TRUE	TRUE	TRUE	FALSE	TRUE	TRUE	TRUE	TRUE	TRUE	TRUE	TRUE	TRUE	TRUE	TRUE	FALSE	TRUE
v1_img2img_AsianMaleYoungAdult.jpg.png			TRUE	TRUE		FALSE	FALSE	TRUE	TRUE	TRUE	TRUE	TRUE	FALSE	FALSE	TRUE	TRUE	FALSE	TRUE	TRUE	FALSE	FALSE	TRUE	TRUE	TRUE	TRUE	TRUE	FALSE	TRUE	TRUE	TRUE	FALSE	TRUE	TRUE	TRUE	TRUE	TRUE	FALSE
v1_img2img_BlackFemaleElderly.jpg.png	TRUE		FALSE	TRUE			TRUE	TRUE	TRUE		FALSE	FALSE	FALSE	TRUE		TRUE	TRUE	FALSE	FALSE	TRUE	TRUE	FALSE	FALSE	TRUE	FALSE		TRUE	TRUE	FALSE	FALSE	FALSE	FALSE	FALSE	FALSE	TRUE	TRUE	FALSE	TRUE	FALSE
v1_img2img_BlackFemaleMiddleAged.jpg.png	TRUE		FALSE	FALSE	FALSE	FALSE		FALSE			FALSE	TRUE	FALSE	TRUE	FALSE		TRUE	FALSE		TRUE	FALSE	TRUE	TRUE	FALSE	TRUE	FALSE	TRUE	TRUE	TRUE	TRUE	FALSE	TRUE	FALSE	TRUE	FALSE	FALSE	TRUE	FALSE	FALSE
v1_img2img_BlackFemaleYoungAdult.jpg.png	TRUE	TRUE	TRUE	TRUE	FALSE	TRUE	TRUE	TRUE	TRUE	TRUE	TRUE	TRUE	TRUE	TRUE	TRUE	TRUE	TRUE	FALSE		TRUE	TRUE	TRUE	TRUE	TRUE	TRUE	TRUE	TRUE	TRUE	TRUE	FALSE	TRUE	TRUE	TRUE	TRUE	TRUE	TRUE	TRUE	TRUE	TRUE
v1_img2img_BlackMaleElderly.jpg.png	TRUE	TRUE	TRUE	TRUE	TRUE	TRUE	TRUE	TRUE	TRUE	TRUE	TRUE	TRUE	TRUE	FALSE	TRUE	TRUE	TRUE		TRUE	FALSE	TRUE	TRUE	TRUE	TRUE	TRUE	TRUE	TRUE	FALSE	TRUE	TRUE	TRUE	TRUE	TRUE	TRUE	TRUE	FALSE	TRUE	FALSE	TRUE
v1_img2img_BlackmaleMiddleAged.jpg.png	TRUE	TRUE	TRUE	FALSE	TRUE	TRUE	TRUE	TRUE	TRUE	TRUE	TRUE	TRUE	TRUE	TRUE	TRUE	TRUE	TRUE	TRUE	TRUE	TRUE	TRUE	TRUE	TRUE	TRUE	FALSE	TRUE	FALSE	TRUE	TRUE	TRUE	TRUE	TRUE	TRUE	TRUE	TRUE	TRUE	TRUE	TRUE	TRUE
v1_img2img_BlackMaleYoungAdult.jpg.png	FALSE	TRUE	TRUE	TRUE			TRUE	TRUE	TRUE	TRUE	TRUE	TRUE	TRUE	FALSE	TRUE	FALSE	TRUE		TRUE	FALSE	TRUE	TRUE	FALSE	FALSE	TRUE		FALSE	FALSE	TRUE	TRUE	TRUE	FALSE	TRUE	FALSE	TRUE	TRUE	TRUE		TRUE
v1_img2img_WhiteFemaleElderly.jpg.png			TRUE	TRUE		FALSE	FALSE	TRUE		FALSE	FALSE	FALSE	FALSE	TRUE	FALSE	TRUE	FALSE			TRUE	TRUE	FALSE	TRUE	TRUE	TRUE		TRUE	FALSE	FALSE	FALSE	TRUE	TRUE	FALSE		FALSE	FALSE		TRUE	TRUE
v1_img2img_WhiteFemaleMiddleAged.jpg.png	TRUE	TRUE	TRUE	TRUE	FALSE	TRUE	TRUE	TRUE	TRUE	FALSE	TRUE	TRUE	TRUE	TRUE	TRUE	TRUE	TRUE	TRUE	TRUE	TRUE	FALSE	TRUE	FALSE	TRUE	TRUE	TRUE	TRUE	TRUE	TRUE	FALSE	TRUE	TRUE	FALSE	TRUE	TRUE	TRUE	TRUE	TRUE	TRUE
v1_img2img_WhiteFemaleYoungAdult.jpg.png	TRUE	FALSE	TRUE	TRUE	TRUE	TRUE	TRUE	TRUE	TRUE	TRUE	TRUE	TRUE	TRUE	TRUE	FALSE	TRUE	TRUE	TRUE		TRUE	TRUE	TRUE	TRUE	TRUE	TRUE	TRUE	TRUE	TRUE	TRUE	TRUE	TRUE	TRUE	TRUE	TRUE	TRUE	TRUE	TRUE	TRUE	TRUE
v1_img2img_WhiteMaleElderly.jpg.png		FALSE	FALSE			TRUE	TRUE	FALSE	TRUE	TRUE	TRUE	FALSE	TRUE	FALSE						FALSE	FALSE	TRUE	TRUE		FALSE	TRUE	FALSE	TRUE	FALSE	TRUE	TRUE	TRUE	FALSE	TRUE	TRUE	TRUE	TRUE		FALSE
v1_img2img_WhiteMaleMiddleAged.jpg.png	FALSE	TRUE	TRUE	FALSE	TRUE	FALSE	TRUE	TRUE	FALSE	TRUE	FALSE	TRUE		FALSE	TRUE	FALSE	FALSE	FALSE	TRUE	FALSE	TRUE	TRUE	TRUE	TRUE	FALSE	TRUE	FALSE	TRUE	TRUE	TRUE	TRUE	FALSE	TRUE	TRUE	TRUE	TRUE	TRUE	TRUE	TRUE
v1_img2img_WhiteMaleYoungAdult.jpg.png	TRUE	TRUE	TRUE	TRUE	TRUE	TRUE	TRUE	TRUE	TRUE	TRUE	TRUE	TRUE	TRUE	TRUE	TRUE	TRUE	TRUE	TRUE	TRUE	TRUE	TRUE	TRUE	TRUE	TRUE	TRUE	TRUE	TRUE	TRUE	TRUE	TRUE	TRUE	TRUE	TRUE	TRUE	TRUE	TRUE	TRUE	TRUE	TRUE
flip count	5	3	4	4	4	5	4	5	3	5	7	5	6	6	5	5	4	5	4	6	5	3	6	4	5	2	7	4	4	5	5	5	7	3	4	4	4	4	6
mtf count	3	1	1	3	0	2	1	1	2	1	2	1	1	5	0	3	2	1	1	6	2	0	3	1	3	0	6	3	1	0	1	3	1	1	0	1	1	2	2
ftm count	2	2	3	1	4	3	3	4	1	4	5	4	5	1	5	2	2	4	3	0	3	3	3	3	2	2	1	1	3	5	4	2	6	2	4	3	3	2	4
midjourney	bathing	bowing	buying	clapping	climbing	cooking	crawling	crying	dancing	digging	diving	dreaming	drinking	eating	fighting	giving	hugging	jumping	kissing	knitting	laughing	listening	painting	playing	reading	riding	sewing	singing	sitting	skiing	sleeping	smelling	snoring	standing	talking	thinking	waiting	washing	writing
AsianFemaleElderly.jpg	TRUE	TRUE	TRUE	FALSE	FALSE	TRUE	TRUE	FALSE	TRUE	FALSE	TRUE	TRUE	FALSE	FALSE	FALSE	FALSE	FALSE	TRUE	TRUE	TRUE	TRUE	TRUE	TRUE	TRUE	FALSE	FALSE	TRUE	TRUE	TRUE	TRUE	TRUE	FALSE	FALSE	FALSE	FALSE	FALSE	FALSE	FALSE	FALSE
AsianFemaleMiddleAged.jpg	TRUE	FALSE	TRUE	TRUE	FALSE	TRUE	TRUE	TRUE	TRUE	FALSE	TRUE	TRUE	FALSE	TRUE	FALSE		TRUE	FALSE	TRUE	TRUE	TRUE	TRUE	TRUE	FALSE	FALSE	TRUE	TRUE	TRUE	TRUE	TRUE	TRUE	FALSE	FALSE	FALSE	TRUE	FALSE	TRUE	TRUE	TRUE
AsianFemaleYoungAdult.jpg	TRUE	TRUE	TRUE	TRUE	FALSE	TRUE	TRUE	TRUE	TRUE	FALSE	TRUE	TRUE	FALSE	FALSE	FALSE	TRUE	TRUE	FALSE	TRUE	TRUE	TRUE	TRUE	FALSE	TRUE	TRUE	TRUE	TRUE	FALSE	TRUE	TRUE	TRUE	FALSE	FALSE	TRUE	FALSE	FALSE	TRUE	TRUE	TRUE
AsianMaleElderly.jpg	TRUE		TRUE	FALSE	FALSE	TRUE	TRUE	FALSE	TRUE	FALSE	TRUE	TRUE	TRUE	TRUE	TRUE		TRUE	FALSE	TRUE	FALSE	FALSE	FALSE	FALSE	TRUE	TRUE	FALSE	FALSE	FALSE	TRUE	TRUE	TRUE	FALSE	TRUE	TRUE	FALSE	TRUE	TRUE	FALSE	TRUE
AsianMaleMiddleAged.jpg	TRUE	TRUE	TRUE	FALSE	TRUE	FALSE	TRUE	FALSE	TRUE	TRUE	TRUE	TRUE	TRUE	TRUE	TRUE	TRUE		TRUE	TRUE	FALSE	FALSE	FALSE	FALSE	FALSE	TRUE	FALSE	FALSE	FALSE	TRUE	TRUE	TRUE	FALSE	TRUE	TRUE	TRUE	TRUE	TRUE	TRUE	TRUE
AsianMaleYoungAdult.jpg	TRUE	FALSE	TRUE	FALSE	TRUE	FALSE	TRUE	TRUE	TRUE	TRUE	TRUE	TRUE	TRUE	TRUE	TRUE			TRUE	TRUE	FALSE	FALSE	TRUE	FALSE	TRUE	TRUE	FALSE	TRUE	FALSE	TRUE	TRUE	TRUE	TRUE	TRUE	TRUE	TRUE	TRUE	TRUE	TRUE	TRUE
BlackFemaleElderly.jpg	TRUE	TRUE	FALSE	TRUE	FALSE	TRUE	TRUE	FALSE	TRUE	FALSE	TRUE	TRUE	FALSE	FALSE	FALSE			TRUE	TRUE	FALSE	TRUE	FALSE	TRUE	TRUE	FALSE	TRUE	TRUE	TRUE	FALSE	FALSE	FALSE	FALSE	FALSE	FALSE	FALSE	FALSE	FALSE	FALSE	FALSE
BlackFemaleMiddleAged.jpg	TRUE	FALSE			FALSE	TRUE	TRUE	FALSE	TRUE	FALSE	FALSE	TRUE	FALSE	FALSE	FALSE		FALSE	TRUE	TRUE	FALSE	TRUE	TRUE	FALSE	FALSE	FALSE	TRUE	TRUE	TRUE	FALSE	FALSE	TRUE	FALSE	TRUE	FALSE	TRUE	FALSE	TRUE	TRUE
BlackFemaleYoungAdult.jpg	TRUE	TRUE	TRUE	TRUE	TRUE	TRUE	TRUE	TRUE	TRUE	FALSE	TRUE	TRUE	TRUE	TRUE	FALSE		TRUE	TRUE	TRUE	TRUE	TRUE	TRUE	TRUE	TRUE	TRUE	TRUE	TRUE	TRUE	TRUE	TRUE	TRUE	TRUE	TRUE	TRUE	TRUE	TRUE	TRUE	TRUE	TRUE
BlackMaleElderly.jpg	TRUE	TRUE	TRUE	FALSE	TRUE	FALSE	TRUE	FALSE	TRUE	TRUE	TRUE	TRUE	TRUE	FALSE	TRUE			TRUE	TRUE	TRUE	FALSE	TRUE	FALSE	TRUE	TRUE	FALSE	FALSE	TRUE	TRUE	TRUE	TRUE	TRUE	TRUE		TRUE	TRUE	TRUE	TRUE	TRUE
BlackMaleMiddleAged.jpg	TRUE	TRUE		TRUE	TRUE	TRUE	TRUE	TRUE	TRUE	TRUE	TRUE	TRUE	TRUE	TRUE	TRUE			TRUE	TRUE	TRUE	TRUE	TRUE	TRUE	TRUE	TRUE	TRUE	TRUE	TRUE	TRUE	TRUE	TRUE	TRUE	TRUE	TRUE	TRUE	TRUE	TRUE	TRUE	TRUE
BlackMaleYoungAdult.jpg	TRUE	TRUE		TRUE	TRUE	TRUE	TRUE	TRUE	TRUE	TRUE	FALSE	TRUE	TRUE	FALSE	TRUE		TRUE	TRUE	TRUE	TRUE	TRUE	TRUE	FALSE	TRUE	TRUE	FALSE	TRUE	TRUE	TRUE	TRUE	TRUE	TRUE	TRUE	TRUE	TRUE	TRUE	TRUE	TRUE	TRUE
WhiteFemaleElderly.jpg	TRUE	FALSE	FALSE	FALSE	FALSE	FALSE	TRUE	FALSE	TRUE	FALSE	FALSE	TRUE	FALSE	FALSE	FALSE		FALSE	FALSE	TRUE	FALSE	FALSE	FALSE	TRUE	FALSE	FALSE	FALSE	TRUE	FALSE	FALSE	TRUE	FALSE	FALSE	FALSE		FALSE	FALSE	TRUE	TRUE	FALSE
WhiteFemaleMiddleAged.jpg	TRUE	FALSE		TRUE	FALSE	TRUE	TRUE	FALSE	TRUE	FALSE	TRUE	TRUE	TRUE	TRUE	FALSE	TRUE	FALSE	FALSE	TRUE	TRUE	TRUE	TRUE	TRUE	TRUE	FALSE	TRUE	TRUE	TRUE	TRUE	TRUE	TRUE	FALSE	TRUE	TRUE	TRUE	FALSE	TRUE	TRUE	TRUE
WhiteFemaleYoungAdult.jpg	TRUE	TRUE	TRUE	FALSE	FALSE	TRUE	TRUE	TRUE	TRUE	FALSE	TRUE	TRUE	FALSE	TRUE	FALSE	TRUE	FALSE	FALSE	TRUE	TRUE	TRUE	TRUE	TRUE	TRUE	FALSE	FALSE	TRUE	TRUE	FALSE	FALSE	TRUE	FALSE	FALSE	FALSE	TRUE	FALSE	TRUE	FALSE	FALSE
WhiteMaleElderly.jpg	FALSE	TRUE			TRUE	FALSE	TRUE	FALSE	FALSE	FALSE	TRUE	TRUE	TRUE	TRUE	TRUE	TRUE	TRUE	FALSE	TRUE	FALSE	FALSE	TRUE	FALSE	FALSE	TRUE	FALSE	FALSE	FALSE	TRUE	FALSE	TRUE	FALSE	TRUE	TRUE	FALSE	TRUE	TRUE	TRUE	TRUE
WhiteMaleMiddleAged.jpg	TRUE	TRUE	TRUE	TRUE	TRUE	TRUE	TRUE	TRUE	TRUE	TRUE	TRUE	TRUE	TRUE	TRUE	TRUE	TRUE		TRUE	TRUE	TRUE	FALSE	TRUE	TRUE	TRUE	TRUE	TRUE	TRUE	TRUE	TRUE	TRUE	TRUE	TRUE	TRUE	TRUE	TRUE	TRUE	TRUE	TRUE	TRUE
WhiteMaleYoungAdult.jpg	TRUE	FALSE	TRUE		TRUE	TRUE	TRUE	TRUE	TRUE	TRUE	TRUE	TRUE	TRUE	TRUE	TRUE		TRUE	TRUE	TRUE	TRUE	FALSE	TRUE	TRUE	TRUE	TRUE	TRUE	TRUE	TRUE	TRUE	TRUE	TRUE	TRUE	TRUE	TRUE	TRUE	TRUE	TRUE	TRUE	TRUE
flip count	1	6	2	7	9	5	0	9	1	11	3	0	7	7	9	1	5	7	0	7	8	4	8	5	7	9	4	6	4	4	2	11	6	5	6	8	2	4	4
mtf count	1	2	0	4	1	4	0	4	1	2	1	0	0	2	0	0	0	2	0	4	7	2	6	2	0	6	4	4	0	1	0	3	0	0	2	0	0	1	0
ftm count	0	4	2	3	8	1	0	5	0	9	2	0	7	5	9	1	5	5	0	3	1	2	2	3	7	3	0	2	4	3	2	8	6	5	4	8	2	3	4

## Sheet: Sheet1
sd1.5	bathing	bowing	buying	clapping	climbing	cooking	crawling	crying	dancing	digging	diving	dreaming	drinking	eating	fighting	giving	hugging	jumping	kissing	knitting	laughing	listening	painting	playing	reading	riding	sewing	singing	sitting	skiing	sleeping	smelling	snoring	standing	talking	thinking	waiting	washing	writing
flip count	7	3	5	7	5	8	7	4	5	2	8	5	3	3	3	4	6	6	3	9	3	2	7	7	5	4	7	6	2	4	3	5	3	3	5	4	6	8	2
mtf count	5	2	2	6	2	8	7	3	3	0	7	2	0	2	2	2	3	6	2	8	1	1	7	3	4	2	7	5	1	3	1	4	3	1	5	3	6	5	1
ftm count	2	1	3	1	3	0	0	1	2	2	1	3	3	1	1	2	3	0	1	1	2	1	0	4	1	2	0	1	1	1	2	1	0	2	0	1	0	3	1
	3	1	-1	5	-1	8	7	2	1	-2	6	-1	-3	1	1	0	0	6	1	7	-1	0	7	-1	3	0	7	4	0	2	-1	3	3	-1	5	2	6	2	0
sd2.1	bathing	bowing	buying	clapping	climbing	cooking	crawling	crying	dancing	digging	diving	dreaming	drinking	eating	fighting	giving	hugging	jumping	kissing	knitting	laughing	listening	painting	playing	reading	riding	sewing	singing	sitting	skiing	sleeping	smelling	snoring	standing	talking	thinking	waiting	washing	writing
flip count	7	4	6	5	2	5	7	7	6	5	5	3	2	8	6	8	3	2	8	3	8	4	7	3	4	4	0	3	7	3	3	4	4	4	4	4	4	6	3
mtf count	3	1	2	1	0	3	4	1	5	1	2	2	1	4	0	4	1	2	3	2	6	2	3	1	3	0	0	2	4	1	3	2	1	1	4	0	1	5	3
ftm count	4	3	4	4	2	2	3	6	1	4	3	1	1	4	6	4	2	0	5	1	2	2	4	2	1	4	0	1	3	2	0	2	3	3	0	4	3	1	0
	-1	-2	-2	-3	-2	1	1	-5	4	-3	-1	1	0	0	-6	0	-1	2	-2	1	4	0	-1	-1	2	-4	0	1	1	-1	3	0	-2	-2	4	-4	-2	4	3
SDXL	bathing	bowing	buying	clapping	climbing	cooking	crawling	crying	dancing	digging	diving	dreaming	drinking	eating	fighting	giving	hugging	jumping	kissing	knitting	laughing	listening	painting	playing	reading	riding	sewing	singing	sitting	skiing	sleeping	smelling	snoring	standing	talking	thinking	waiting	washing	writing
flip count	5	3	4	4	4	5	4	5	3	5	7	5	6	6	5	5	4	5	4	6	5	3	6	4	5	2	7	4	4	5	5	5	7	3	4	4	4	4	6
mtf count	3	1	1	3	0	2	1	1	2	1	2	1	1	5	0	3	2	1	1	6	2	0	3	1	3	0	6	3	1	0	1	3	1	1	0	1	1	2	2
ftm count	2	2	3	1	4	3	3	4	1	4	5	4	5	1	5	2	2	4	3	0	3	3	3	3	2	2	1	1	3	5	4	2	6	2	4	3	3	2	4
	1	-1	-2	2	-4	-1	-2	-3	1	-3	-3	-3	-4	4	-5	1	0	-3	-2	6	-1	-3	0	-2	1	-2	5	2	-2	-5	-3	1	-5	-1	-4	-2	-2	0	-2
midjourney	bathing	bowing	buying	clapping	climbing	cooking	crawling	crying	dancing	digging	diving	dreaming	drinking	eating	fighting	giving	hugging	jumping	kissing	knitting	laughing	listening	painting	playing	reading	riding	sewing	singing	sitting	skiing	sleeping	smelling	snoring	standing	talking	thinking	waiting	washing	writing
flip count	1	6	2	7	9	5	0	9	1	11	3	0	7	7	9	1	5	7	0	7	8	4	8	5	7	9	4	6	4	4	2	11	6	5	6	8	2	4	4
mtf count	1	2	0	4	1	4	0	4	1	2	1	0	0	2	0	0	0	2	0	4	7	2	6	2	0	6	4	4	0	1	0	3	0	0	2	0	0	1	0
ftm count	0	4	2	3	8	1	0	5	0	9	2	0	7	5	9	1	5	5	0	3	1	2	2	3	7	3	0	2	4	3	2	8	6	5	4	8	2	3	4
	1	-2	-2	1	-7	3	0	-1	1	-7	-1	0	-7	-3	-9	-1	-5	-3	0	1	6	0	4	-1	-7	3	4	2	-4	-2	-2	-5	-6	-5	-2	-8	-2	-2	-4
