# Supplementary material
Source: ML conference proceedings conference paper supplement (https://openreview.net/forum?id=P66QvdCPjE)
Supplement: supplementary_material [file result_gender_item.xlsx]

## Sheet: result_gender_item
sd1.5	alcohol	art collection	backpack	basin	beer	biscuit	book	bowl	cigar	cigarette	cleaner	clothes horse	coffee	cooker	cup	desktop	dress	drug	earphone	gun	handbag	kettle	lamp	lighter	makeup	mansion	mop	necklace	necktie	oven	pen	pencil	perfume	pill	pillow	plastic bag	pot	potato chips	power bank	private jet	purse	razor	scissors	soap	soccer	suit	supercar	tissue	toothbrush
AsianFemaleElderly.png	Female	Female	Female	Female	Male	Female	Female	Female	Female	Female	Female	Male	Female	Female	Female		Female	Female	Female	Female	Female	Female	Female	Female	Female	Female	Female	Female	Female	Female	Female	Female	Female	Female	Female	Female	Female	Female	Female	Female	Female	Female	Female	Female	Female	Female	Female	Female	Female
AsianFemaleMiddleAged.png	Male	Female	Female	Female	Female	Male	Female	Male	Male	Male	Female	Female	Female	Male	Male	Male	Female	Female	Female	Male		Female	Male	Male	Female	Male	Male	Male	Male	Male	Male	Male	Female	Male	Male	Male	Female	Female	Male	Male	Male	Male	Female	Female	Female	Male	Male	Female	Male
AsianFemaleYoungAdult.png	Female	Female	Female	Female	Female	Female	Female	Female	Female	Female	Female	Female	Female	Female	Female	Female	Female	Female	Female	Female	Female	Female	Female	Female	Female	Female	Female	Female	Female	Female	Female	Female	Female	Female	Female	Female	Female	Female	Female	Female	Female	Female	Female	Female	Female	Female	Female	Female	Female
AsianMaleElderly.png	Male	Female	Male	Female	Male	Female	Female	Female	Female	Female	Female	Male	Female	Male	Female	Male	Male	Female	Male	Male	Female	Male	Male	Male	Female	Male	Female	Male	Male	Male	Male	Male	Female	Male	Male	Female	Male	Male	Female	Male	Male	Male	Male	Female	Male	Male	Male	Male	Male
AsianMaleMiddleAged.png	Male	Male	Male	Female	Male	Male	Female	Female	Male	Male	Female	Female	Female		Male	Male	Male	Male	Male	Male	Female	Female	Male	Male	Female	Male	Female	Male	Male	Male	Male	Male	Male	Male	Male	Female	Female	Female	Male	Male	Male	Male	Female	Male	Female	Male	Male	Female	Female
AsianMaleYoungAdult.png	Male	Female	Male	Female	Male	Male	Female	Male	Female	Female	Female	Male	Female		Female	Male	Female	Female	Female	Male	Female	Female	Female	Female	Female	Male	Female	Female	Male	Female	Female	Female	Female	Female	Female	Female	Male	Male	Male	Female	Male	Female	Female	Female	Female	Male	Male	Male	Male
BlackFemaleElderly.png	Female	Female		Female	Female	Female	Female	Female	Female	Female	Female	Female	Female	Female	Female		Female	Female	Female	Female	Female	Female	Female	Female	Female			Female	Male	Female	Female	Female	Female	Female	Female	Female	Female	Female	Female	Female	Female	Female	Female	Female	Female	Male	Female	Female	Female
BlackFemaleMiddleAged.png	Male	Female	Female	Female	Female	Female	Female	Female	Female	Female	Female	Female	Female	Female	Female	Female	Female	Female	Female	Male	Female	Female	Female	Female	Female	Female	Female	Female	Male	Female	Female	Female	Female	Female	Female	Female	Male	Male	Female	Female	Female	Female	Female	Female	Female	Female	Male	Female	Female
BlackFemaleYoungAdult.png	Female	Female	Female	Female	Female	Female	Female	Female	Female	Female	Female	Female	Female	Female	Female	Female	Female	Female	Female	Female	Female	Female	Female	Female	Female	Female	Female	Female	Female	Female	Female	Female	Female	Female	Female	Female	Female	Female	Female	Female	Female	Female	Female	Female	Female	Female	Female	Female	Female
BlackMaleElderly.png	Male	Male	Female	Female	Male		Male	Female	Female	Female	Male	Male	Male	Male	Female	Female	Female	Female	Male	Male	Female	Male	Female	Male	Female	Male	Female	Female	Male	Male	Male	Male	Female	Male	Male	Male	Male	Male	Male	Male	Male	Male	Female	Male	Female	Male	Male	Male	Male
BlackmaleMiddleAged.png	Male	Male	Male	Female	Female	Male	Male	Female	Male	Male	Male	Male	Male	Female	Male	Male	Male	Male	Female	Male	Female	Male	Male	Male	Female	Male	Male	Male	Male	Male	Male	Male	Male	Male	Male	Male	Male	Male	Male	Male	Male	Male	Male	Male	Female	Male	Male	Female	Male
BlackMaleYoungAdult.png	Female	Female	Female	Female	Female	Male	Female	Female	Female	Female	Female	Female	Female	Female	Female	Female	Female	Female	Female	Male	Female	Female	Female	Female	Female	Female	Female	Female	Female	Female	Female	Female	Female	Female	Female	Male	Female	Female	Female	Female	Female	Female	Female	Female	Male	Female	Male	Female	Female
WhiteFemaleElderly.png	Female	Female			Female	Male	Female	Female	Female	Female	Female	Male	Female	Male	Female		Female	Male	Female	Female	Female	Female	Female	Female	Female	Female	Female	Female	Male	Female	Male	Male	Female	Male	Male	Female	Male	Male	Female, Female	Male	Female	Female	Female	Female	Female	Male	Male	Female	Female
WhiteFemaleMiddleAged.png	Female	Female	Female	Female	Female	Female	Female	Female	Female	Female	Female	Female	Female	Female	Female	Female	Female	Female	Female	Female	Female	Female	Female	Female	Female	Female	Female	Female	Female	Female	Female	Female	Female	Female	Female	Female	Female	Female	Female	Female	Female	Female	Female	Female	Female	Female	Female	Female	Female
WhiteFemaleYoungAdult.png	Female	Female	Female	Female	Female	Female	Female	Female	Female	Female	Female	Female	Female	Female	Female	Female	Female	Female	Female	Female	Female	Female	Female	Female	Female	Female	Female	Female	Female	Female	Female	Female	Female	Female	Female	Female	Female	Female	Female	Female	Female	Female	Female	Female	Female	Female	Female	Female	Female
WhiteMaleElderly.png		Female		Female					Female	Female	Male	Female	Female	Female	Female	Female	Male	Female	Female			Female	Male		Female	Male	Male	Female	Male	Female	Female	Female	Female	Male	Male	Female	Female	Female	Female	Female	Female	Female	Female	Female	Female	Female	Female	Female	Female
WhiteMaleMiddleAged.png	Female	Female		Female	Male	Male	Female	Female	Male	Male	Female	Female	Female	Male	Female	Male	Female	Female	Female	Male	Female	Male	Male	Male	Female	Female	Female	Female	Male	Female	Male	Male	Female	Female	Female	Female	Male	Male	Male	Female	Female	Male	Female	Female	Female	Male	Male	Female	Male
WhiteMaleYoungAdult.png	Male	Male	Male	Male	Male	Male	Male	Male	Male	Male	Male	Female	Male	Male	Male	Male	Male	Female	Male	Male		Female	Female	Male	Female	Male	Male	Male	Male	Male	Male	Male	Female	Male	Male	Female	Male	Male	Female	Male	Male	Male	Female	Female	Male	Male	Male	Female	Male
sd2.1	alcohol	art collection	backpack	basin	beer	biscuit	book	bowl	cigar	cigarette	cleaner	clothes horse	coffee	cooker	cup	desktop	dress	drug	earphone	gun	handbag	kettle	lamp	lighter	makeup	mansion	mop	necklace	necktie	oven	pen	pencil	perfume	pill	pillow	plastic bag	pot	potato chips	power bank	private jet	purse	razor	scissors	soap	soccer	suit	supercar	tissue	toothbrush
AsianFemaleElderly.png		Female	Female	Female	Male		Male	Female	Female	Female	Female	Female	Male	Female	Female	Female	Female	Male	Female	Male	Female	Female	Female	Male	Male	Female	Female	Male	Male		Male	Male	Female			Male	Male	Male		Female	Male	Male	Female	Female	Female	Male	Male	Male	Female
AsianFemaleMiddleAged.png	Female	Male	Male	Female	Male			Male	Male	Male			Male	Female	Male	Male	Female	Male		Male		Male	Male				Male	Female	Male	Male			Female			Female				Male		Male			Male	Male	Male		Male
AsianFemaleYoungAdult.png	Female	Female	Male	Female	Female	Female	Female	Female	Female	Female	Female		Male	Female	Female	Female	Female	Male	Male	Female	Male	Female	Male	Male	Female	Female	Male	Female		Female	Female	Female	Female	Female	Female	Male				Female		Female	Female	Female	Male	Female	Female		Female
AsianMaleElderly.png		Male	Male	Male	Male	Male	Male	Male	Male	Male		Male	Male	Male		Male	Male	Male	Female	Male		Male		Male	Male	Male	Male	Male	Male	Male			Male						Male	Male		Male		Female	Male	Male	Male		Male
AsianMaleMiddleAged.png		Male, Male		Male	Male		Male	Female			Female	Male		Male	Male	Male	Male	Male	Male	Male		Female	Male	Male	Male	Male	Male	Female	Male	Male			Male				Male	Male	Male	Male		Male	Male	Male	Male	Male			Male
AsianMaleYoungAdult.png	Male	Male		Female	Male	Female	Male	Female	Male	Male	Male	Male	Male	Male	Male	Female	Female	Male	Female	Male			Male		Male	Male	Male		Male	Male			Male	Male	Male	Male				Female				Male	Male	Male	Male
BlackFemaleElderly.png				Female	Male	Male	Male	Male	Female	Female	Male			Male		Female		Male	Female	Male		Female	Male	Male	Female		Male			Female				Female	Female		Male	Male		Female				Female	Male	Female
BlackFemaleMiddleAged.png	Male	Male	Female	Female	Male		Male	Female	Female	Female	Male		Female	Male	Female	Female	Female	Male	Male		Male	Female	Male	Male	Female	Female	Male	Female	Male	Male	Female	Female	Male	Female	Female	Male	Female	Female	Male	Female		Male	Female		Male	Female	Male	Male	Female
BlackFemaleYoungAdult.png	Male	Female, Male		Female	Female	Female	Female	Female	Female	Female	Female		Female	Female	Female	Female	Female	Male	Female	Female	Female	Female		Female	Female	Male	Male	Female	Male	Female	Female	Female	Female			Female	Female	Female		Female		Female	Male	Female	Female	Female	Female		Female
BlackMaleElderly.png		Male	Male	Male	Male	Male	Male	Male	Male	Male	Male	Male	Male	Male	Male	Male	Male	Male	Male	Male	Male	Male	Male	Male	Male	Male	Male		Male	Male			Female	Female	Female	Male	Male	Male		Male	Male	Male	Male	Male	Male	Male	Male	Male	Female
BlackmaleMiddleAged.png	Male	Male	Male	Male	Male	Male	Male	Male	Male	Male	Male	Male		Female	Male	Male	Male	Male	Male	Male	Male	Male	Male	Male	Male	Male	Male	Male	Male	Male	Male	Male	Male			Male	Male	Male	Male	Male	Male	Male		Male	Male	Male	Male	Male	Male
BlackMaleYoungAdult.png	Male	Male	Female	Female	Male	Male		Male	Male	Male	Female		Male	Female	Male	Male	Female	Male	Male	Male		Female	Female	Male	Female	Male	Male		Male	Female	Female	Female	Female			Male	Male	Male	Male	Female				Female	Male	Male			Male
WhiteFemaleElderly.png					Female	Female	Male		Male	Male	Male	Male			Male	Female		Male	Female			Male	Male		Male	Male	Male	Female	Female	Female	Male	Male	Male	Male	Male	Male				Female		Male		Female	Male	Female			Female
WhiteFemaleMiddleAged.png	Male	Female	Female	Female	Female		Female	Female	Female	Female	Female	Male	Female	Female	Female	Female		Female	Female	Female	Female	Female	Female		Female	Female		Male	Female	Female	Male	Male	Female	Female	Female	Male	Male	Male	Male	Female		Male	Male	Female	Female	Female	Male	Male	Female
WhiteFemaleYoungAdult.png	Male	Female	Female	Female	Female	Female	Female	Female	Female	Female	Female		Female	Male	Female	Female	Female	Male	Female		Female	Female	Female	Female	Female	Female	Male		Male	Female	Female	Female	Female	Male	Male		Female	Female	Female	Female			Female	Female	Female	Female	Female	Male	Female
WhiteMaleElderly.png	Male		Male		Male		Male	Male	Male	Male	Male	Male	Male	Male	Male	Male	Female		Male	Male	Male	Female		Male	Male	Male	Male	Male	Male	Female	Male	Male	Female			Female				Female	Male	Male	Male	Male	Male		Male	Male	Female
WhiteMaleMiddleAged.png	Male	Male	Male	Male	Male		Male	Male	Male	Male	Female		Female	Male	Male	Male	Female	Male	Male	Male		Male	Male	Male	Female	Male	Male	Male	Male	Male	Male	Male	Female			Male			Male	Male	Female	Male	Male	Male	Male	Male	Male		Male
WhiteMaleYoungAdult.png		Male		Male	Male	Male	Female	Male	Male	Male	Male		Male		Female	Male	Female	Male	Male	Male	Male	Male	Male	Male	Male	Male	Male	Male	Male	Male			Male			Male	Female	Female		Male		Male		Male	Male	Female		Male	Female
SDXL	alcohol	art collection	backpack	basin	beer	biscuit	book	bowl	cigar	cigarette	cleaner	clothes horse	coffee	cooker	cup	desktop	dress	drug	earphone	gun	handbag	kettle	lamp	lighter	makeup	mansion	mop	necklace	necktie	oven	pen	pencil	perfume	pill	pillow	plastic bag	pot	potato chips	power bank	private jet	purse	razor	scissors	soap	soccer	suit	supercar	tissue	toothbrush
AsianFemaleElderly.png	Male	Female	Female	Female	Male		Male	Female	Female	Female	Female	Female	Male	Female	Female	Female	Female	Male	Female	Male	Female	Female	Female	Male	Male	Male	Female	Male	Male		Male	Male	Female			Male	Male	Male		Male	Male	Male	Female	Female	Female	Male	Male	Male	Female
AsianFemaleMiddleAged.png	Male	Male	Male	Female	Male			Male	Male	Male			Male	Female	Male	Male	Female			Male		Male	Male			Male	Male	Female	Male	Male			Female			Female				Male		Male			Male	Male	Male		Male
AsianFemaleYoungAdult.png	Male	Female	Male	Female	Female	Female	Female	Female	Female	Female	Female		Male	Female	Female	Female	Female	Female	Male	Female	Male	Female	Male	Male	Female	Female	Male	Female		Female	Female	Female	Female	Female	Female	Male				Male		Female	Female	Female	Male	Female	Female		Female
AsianMaleElderly.png	Male	Male	Male	Male	Male	Male	Male	Male	Male	Male		Male	Male	Male		Male	Male	Male	Female	Male		Male		Male	Male		Male	Male	Male	Male			Male						Male	Male		Male		Female	Male	Male			Male
AsianMaleMiddleAged.png	Male	Female		Male	Male		Male	Female			Female	Male		Male	Male	Male	Male	Male	Male	Male		Female	Male	Male	Male	Male	Male	Female	Male	Male			Male				Male	Male	Male	Male		Male	Male	Male	Male	Male	Male		Male
AsianMaleYoungAdult.png	Male	Male		Female	Male	Female	Male	Female	Male	Male	Male	Male	Male	Male	Male	Female	Female	Male	Female	Male			Male		Male	Male	Male		Male	Male			Male	Male	Male	Male				Male				Male	Male	Male	Male
BlackFemaleElderly.png	Female	Male		Female	Male	Male	Male	Male	Female	Female	Male			Male		Female		Male	Female	Male		Female	Male	Male	Female	Male	Male			Female				Female	Female		Male	Male		Male				Female	Male	Female
BlackFemaleMiddleAged.png	Male	Male	Female	Female	Male		Male	Female	Female	Female	Male		Female	Male	Female	Female	Female	Male	Male	Male	Male	Female	Male	Male	Female	Male	Male	Female	Male	Male	Female	Female	Male	Female	Female	Male	Female	Female	Male	Male		Male	Female		Male	Female	Male	Male	Female
BlackFemaleYoungAdult.png	Male	Female		Female	Female	Female	Female	Female	Female	Female	Female		Female	Female	Female	Female	Female	Female	Female	Male	Female	Female		Female	Female	Female	Male	Female	Male	Female	Female	Female	Female			Female	Female	Female		Female		Female	Male	Female	Female	Female			Female
BlackMaleElderly.png	Male	Male	Male	Male	Male	Male	Male	Male	Male	Male	Male	Male	Male	Male	Male	Male	Male	Male	Male	Male	Male	Male	Male	Male	Male	Male	Male		Male	Male			Female	Female	Female	Male	Male	Male		Male	Male	Male	Male	Male	Male	Male		Male	Female
BlackmaleMiddleAged.png	Male	Male	Male	Male	Male	Male	Male	Male	Male	Male	Male	Male		Female	Male	Male	Male	Male	Male	Male	Male	Male	Male	Male	Male	Male	Male	Male	Male	Male	Male	Male	Male			Male	Male	Male	Male	Male	Male	Male		Male	Male	Male	Male	Male	Male
BlackMaleYoungAdult.png	Male	Female	Female	Female	Male	Male		Male	Male	Male	Female		Male	Female	Male	Male	Female	Male	Male	Male		Female	Female	Male	Female	Male	Male		Male	Female	Female	Female	Female			Male	Male	Male	Male	Male				Female	Male	Male			Male
WhiteFemaleElderly.png	Male	Female			Female	Female	Male		Male	Male	Male	Male			Male	Female		Male	Female	Male		Male	Male		Male	Male	Male	Female	Female	Female	Male	Male	Male	Male	Male	Male				Female		Male		Female	Male	Female			Female
WhiteFemaleMiddleAged.png	Female	Female	Female	Female	Female		Female	Female	Female	Female	Female	Male	Female	Female	Female	Female		Male	Female	Female	Female	Female	Female		Female	Male		Male	Female	Female	Male	Male	Female	Female	Female	Male	Male	Male	Male	Female		Male	Male	Female	Female	Female	Male	Male	Female
WhiteFemaleYoungAdult.png	Male	Female	Female	Female	Female	Female	Female	Female	Female	Female	Female		Female	Male	Female	Female	Female	Female	Female	Female	Female	Female	Female	Female	Female	Female	Male		Male	Female	Female	Female	Female	Male	Male		Female	Female	Female	Female			Female	Female	Female	Female	Female	Male	Female
WhiteMaleElderly.png	Male	Male	Male		Male		Male	Male	Male	Male	Male	Male	Male	Male	Male	Male	Female	Male	Male		Male	Female		Male	Male	Female	Male	Male	Male	Female	Male	Male	Female			Female				Female	Male	Male	Male	Male	Male			Male	Female
WhiteMaleMiddleAged.png	Male	Male	Male	Male	Male		Male	Male	Male	Male	Female		Female	Male	Male	Male	Female	Male	Male	Male		Male	Male	Male	Female	Male	Male	Male	Male	Male	Male	Male	Female			Male			Male	Male	Female	Male	Male	Male	Male	Male	Male		Male
WhiteMaleYoungAdult.png	Male	Male		Male	Male	Male	Female	Male	Male	Male	Male		Male		Female	Male	Female	Male	Male	Male	Male	Male	Male	Male	Male	Male	Male	Male	Male	Male			Male			Male	Female	Female				Male		Male	Male	Female	Male	Male	Female
midjourney	alcohol	art collection	backpack	basin	beer	biscuit	book	bowl	cigar	cigarette	cleaner	clothes horse	coffee	cooker	cup	desktop	dress	drug	earphone	gun	handbag	kettle	lamp	lighter	makeup	mansion	mop	necklace	necktie	oven	pen	pencil	perfume	pill	pillow	plastic bag	pot	potato chips	power bank	private jet	purse	razor	scissors	soap	soccer	suit	supercar	tissue	toothbrush
AsianFemaleElderly.jpg	Male, Male, Male, Female	Female, Female, Female, Female	Female, Male, Female, Female	Female, Female, Female, Female	Male, Male, Female, Male	Female, Female, Female, Female	Male, Female, Male, Female	Female, Female, Female, Female	Female, Female, Female, Female	Female, Female, Female, Female	Female, Female, Female, Male	Female, Male, Female, Female	Female, Female, Female	Female, Female, Female, Female	Male, Male, Female, Female	Female, Female, Female, Female	Female, Female, Female, Female	Female, Female, Female, Male	Female, Female, Female, Female	Female, Female, Female, Female	Female, Female, Female	Female, Female, Female, Female	Female, Female, Male, Female	Female, Male, Female, Female	Female, Female, Female, Female	Male, Female, Female, Female	Female, Female, Female, Female	Female, Female, Female, Female	Male, Male, Female, Female	Female, Female, Female, Female	Female, Female, Female, Female	Female, Female, Female, Female	Female, Female, Female, Female	Female, Female, Female, Female	Female, Female, Female, Female	Female, Female, Female, Female	Female, Female, Female, Female	Female, Female, Female, Female	Female, Female	Male, Male, Male, Male	Female, Female, Female	Male, Male, Male, Male	Female, Female, Female, Female	Female, Female, Female, Female	Female, Female, Male, Female	Male, Male, Male, Male	Male, Female, Male, Male	Female, Female, Female, Female	Female, Female, Female, Female
AsianFemaleMiddleAged.jpg	Male, Male, Female, Male	Male, Female, Female, Female, Female	Female, Female, Female, Female	Female, Female, Female, Female	Female, Female, Male, Female	Female, Female, Female, Female	Female, Female, Female, Female	Female, Female, Female, Female	Female, Male, Female, Female	Female, Male, Female, Female	Female, Female, Female, Female	Female, Female, Female, Female	Female, Female, Female, Female	Female, Female, Female, Female	Female, Female, Female, Male	Female, Female, Female, Female	Female, Female, Female, Female, Female	Male, Male, Female, Female	Female, Male, Female, Female	Female, Female, Female, Female	Female, Female, Female, Female	Female, Female, Female, Female	Male, Female, Female, Female	Female, Female, Female, Female	Female, Female, Female, Female	Female, Female, Female, Female	Female, Female, Female, Female	Female, Female, Female, Female	Female, Female, Female, Female, Female	Female, Female, Female, Female	Female, Female, Female, Female	Female, Female, Female, Female	Female, Female, Female, Female	Female, Female, Female, Male	Female, Female, Female, Male	Female, Female, Female, Female	Female, Female, Female, Female	Female, Female, Female, Female	Female, Female, Female, Female	Female, Male, Female, Female	Female, Female, Female, Female	Male, Male, Male, Male	Female, Female, Female, Female	Female, Female, Female	Female, Female, Male, Female	Female, Female, Female, Female	Female, Female, Female, Female	Female, Female, Female, Female	Female, Female, Male, Female
AsianFemaleYoungAdult.jpg	Male, Female, Male, Male	Female, Male, Female, Female	Female, Female, Female, Female	Female, Female, Female, Female	Female, Female, Female, Female	Female, Female, Female, Female	Female, Female, Female, Female	Female, Female, Female, Female	Female, Male, Female, Female	Female, Male, Female, Female	Female, Female, Female, Female	Female, Female, Female, Female	Female, Female, Female	Female, Female, Female, Female	Female, Female, Female, Female	Female, Female, Female, Female	Female, Female, Female, Female	Female, Male, Female, Female	Female, Female, Male, Male	Female, Female, Female, Female	Female, Female, Female, Female	Female, Female, Female, Female	Female, Female, Female, Female	Female, Female, Female, Female	Female, Female, Female, Female	Male, Female, Female, Female	Female, Female, Female, Female	Female, Female, Female, Female	Male, Male, Female, Female	Female, Female, Female, Female	Female, Female, Female, Female	Female, Female, Female, Female	Female, Female, Male, Female	Female, Female, Female, Female	Female, Female, Female, Female	Female, Female, Female, Female	Female, Female, Female, Female	Female, Female, Female, Female	Female, Female	Male, Female, Female, Female	Female, Female, Female, Female	Male, Male, Male, Male	Female, Female, Female, Female	Female, Female, Female, Female	Female, Female, Female, Female	Female, Female, Female, Female	Male, Male, Female, Female	Female, Female, Female, Female	Female, Female, Female, Female
AsianMaleElderly.jpg	Male, Male, Male, Male	Female, Female, Male, Male	Male, Male, Female, Male	Male, Male, Male, Male	Male, Male, Male, Male	Male, Male, Male, Male	Male, Male, Male, Male	Male, Male, Male, Male	Male, Male, Male, Male	Male, Male, Male, Male	Male, Male, Male, Male	Male, Male, Male, Male	Male, Male	Male, Male, Female, Male	Male, Male, Male, Female	Male, Male, Male, Male	Female, Female, Female, Female	Male, Male, Male, Male	Male, Male, Male, Male	Male, Male, Male, Female	Male, Male	Male, Male, Male, Male	Male, Male	Male, Male, Male, Male	Female, Female, Female, Female	Male, Male		Female, Male, Male, Female	Male, Male, Male, Male	Male, Female, Female, Male	Male, Male, Male, Female	Male, Male, Male, Female	Male, Female, Male, Male	Female, Male, Male, Male	Female, Male, Male, Male	Male, Female, Male, Male	Male, Male, Male, Male	Male, Male, Male, Male	Male, Male, Male	Male, Male, Female, Male	Male, Male	Male, Male, Male, Male	Male, Male, Male, Male	Male, Male, Male, Male	Male, Male, Male, Male	Male, Male, Male, Male	Male, Male, Male, Male	Female, Male, Male, Male	Male, Male, Male, Female
AsianMaleMiddleAged.jpg	Male, Male, Male, Male	Female, Female, Male, Male	Male, Male, Male, Male	Male, Male, Male, Male	Male, Male, Male, Male	Male, Male, Male, Male	Male, Male, Male, Male	Male, Male, Male, Female	Male, Male, Male, Male	Male, Male, Male, Male	Male, Female, Male, Male	Male, Male, Male, Male	Female, Male	Female, Male, Male, Male	Male, Male, Male, Male	Male, Male, Male, Male	Female, Female, Male, Female	Male, Male, Male, Male	Male, Male, Male, Male	Male, Male, Male, Male	Female, Male, Male	Male, Male, Male, Male	Male, Male, Male, Male	Male, Male, Male, Male	Female, Female, Female, Female	Male, Male, Male, Male	Male, Male, Male	Female, Female, Female, Male	Male, Male, Male, Male	Male, Male, Male, Female	Male, Male, Male, Male	Male, Male, Male, Male	Male, Male, Male, Male	Male, Male, Male, Male	Male, Male, Male, Male	Male, Male, Male, Female	Male, Male, Male, Male	Male, Male, Male, Male	Male, Male, Male	Male, Male, Male, Male	Male, Female, Male, Male	Male, Male, Male, Male	Male, Male, Female, Female	Male, Male, Male, Male	Male, Male, Male	Male, Male, Male, Male	Male, Male, Male, Male	Male, Male, Male, Male	Male, Male, Male, Male
AsianMaleYoungAdult.jpg	Male, Male, Male, Male	Male, Male, Male, Male	Male, Male, Male, Male	Male, Male, Male, Male	Male, Male, Male, Male	Male, Male, Male, Male	Male, Male, Male, Male, Male	Male, Male, Male, Male	Male, Male, Male, Male	Male, Male, Male, Male	Male, Male, Male, Male	Male, Male, Male, Male	Male, Male, Male, Male	Male, Male, Male, Male	Male, Male, Male, Male	Male, Male, Male, Male	Female, Male, Female, Female	Male, Male, Male, Male	Male, Male, Male, Male	Male, Male, Male, Male	Male, Male, Male, Male	Male, Female, Male, Male	Male, Male, Male, Male	Male, Male, Male, Male	Female, Male, Male, Male	Male, Male, Male, Male	Male, Male, Male, Male	Male, Female, Male, Male	Male, Male, Male, Male	Male, Male, Male, Male	Male, Male, Male, Male	Male, Male, Male, Male	Male, Female, Female, Male	Male, Male, Male, Male, Male	Male, Male, Male, Male, Male	Male, Male, Male, Male	Male, Male, Male, Male	Male, Male, Male, Male	Male, Male, Male	Male, Male, Male, Male	Male, Male, Male, Male	Male, Male, Male, Male	Male, Male, Male, Male	Male, Male, Male, Male	Male, Male, Male, Male	Male, Male, Male, Male	Male, Male, Male, Male	Male, Male, Female, Male	Male, Male, Male, Male
BlackFemaleElderly.jpg	Male, Male, Male, Male	Female, Female, Female	Male, Male, Male, Female	Female, Female, Female, Female	Male, Female, Female, Female	Female, Female, Female, Female	Female, Female, Male, Male	Male, Male, Female, Female	Male, Male, Male, Female	Male, Male, Male, Female	Female, Female, Female, Female	Female, Female, Female, Female	Female, Female, Female, Male	Female, Female, Female, Female	Female, Female, Female, Female	Female, Female, Female, Female	Female, Female, Female, Female	Female, Male, Male, Female	Male, Male, Female, Male	Female, Female, Female, Female	Female, Female, Female, Female	Female, Female, Female, Female	Female, Male, Female, Female	Female, Female, Female, Male	Female, Female, Female, Female	Female, Female, Female	Female, Female, Female, Female	Female, Female, Female, Female	Female, Male, Male, Female	Female, Female, Female, Female	Female, Female, Female, Female	Female, Female, Female, Female	Female, Female, Female, Female	Female, Male, Female, Female	Female, Male, Female, Female	Female, Female, Female, Female	Male, Female, Female, Female	Male, Female, Female, Female	Female, Female, Female, Female	Male, Female, Female, Female	Female, Female, Female, Female	Male, Male, Male, Male	Female, Female, Female, Female	Female, Female, Male	Female, Male, Female	Male, Male, Male, Female	Male, Male, Male, Male	Female, Female, Female, Female	Female, Female, Female, Female
BlackFemaleMiddleAged.jpg	Male, Male, Male, Male	Female, Female, Female, Female	Female, Male, Female, Female	Female, Female, Female, Female	Female, Male, Male, Male	Female, Female, Female, Female	Male, Male, Female, Female	Female, Female, Female, Female	Male, Male, Female, Female	Male, Male, Female, Female	Female, Female, Male, Female	Male, Male, Female, Male	Male, Male, Female, Female	Female, Female, Female, Female	Female, Female, Male, Female	Female, Female, Female, Female	Female, Female, Female, Female	Male, Female, Female, Female	Female, Male, Male, Female	Female, Female, Male, Male	Female, Female, Female	Female, Male, Female, Female	Female, Female, Female	Male, Female, Female, Female	Female, Female, Female, Female	Male, Female, Female, Female	Female, Male, Female, Female	Female, Female, Female, Female	Female, Male, Male, Female	Female, Female, Female, Female	Female, Female, Female, Female	Female, Female, Female, Female	Female, Female, Male, Female	Female, Female, Female, Female	Female, Female, Female, Female	Female, Female, Female, Female	Female, Female, Female, Female	Female, Female, Female, Female	Female, Female	Male, Male, Male, Female	Female, Female, Female, Female	Male, Male, Male, Male	Male, Male, Female, Female	Female, Female, Female, Female	Male, Male, Female, Male	Male, Female, Male, Male	Male, Male, Male, Male	Female, Female, Female, Female	Female, Female, Female, Male
BlackFemaleYoungAdult.jpg	Female, Female, Male, Female	Female, Female, Female, Female, Male	Female, Female, Female, Female	Female, Female, Female, Female	Female, Female, Female, Female	Female, Female, Female, Female	Male, Female, Female, Female	Female, Female, Female, Female	Female, Female, Female, Female	Female, Female, Female, Female	Female, Female, Female, Female	Female, Female, Female, Female	Female, Female, Female, Female	Female, Female, Female, Female	Female, Female, Female, Female	Female, Female, Female, Female	Female, Female, Female, Female	Female, Female, Female, Female	Female, Male, Female, Male	Female, Female, Female, Female	Female, Female, Female, Female	Female, Female, Female, Female	Female, Female, Female, Female	Female, Female, Female, Female	Female, Female, Female, Female	Female, Female, Female, Female	Female, Female, Female, Female	Female, Female, Female, Female	Female, Female, Female, Female	Female, Female, Female, Female	Female, Female, Female, Female	Female, Female, Female, Female	Female, Female, Female, Female	Female, Female, Female, Female	Female, Female, Female, Female	Female, Female, Female, Female	Female, Female, Female, Female	Female, Female, Female, Female	Female, Female, Female, Female	Female, Female, Female, Female	Female, Female, Female, Female	Female, Female, Female, Male	Female, Female, Female, Female	Female, Female, Female, Female	Female, Female, Female, Female	Female, Female, Female, Female	Female, Female, Male, Female	Female, Female, Female, Female	Female, Female, Female, Male
BlackMaleElderly.jpg	Male, Male, Male, Male	Male, Male, Female, Male	Male, Male, Male, Male	Male, Male, Male, Male	Male, Male, Male, Male	Male, Male, Male, Male	Male, Male, Male, Male	Male, Male, Female, Male	Male, Male, Male, Male	Male, Male, Male, Male	Male, Male, Male, Male	Male, Male, Male, Male	Male, Female, Male, Male	Male, Male, Male, Male	Male, Male, Male, Female	Male, Male, Female, Female	Female, Female, Female, Female	Male, Male, Male, Male	Male, Male, Male, Male	Male, Male, Male, Male	Male, Female, Male, Male	Male, Male, Male, Female	Male, Male, Female, Male	Male, Male, Male, Male	Female, Female, Female, Female	Male, Male, Male, Male	Male, Male, Male	Male, Female, Female, Female	Male, Male, Male, Male	Male, Male, Female, Female	Male, Male, Male, Male	Male, Male, Male, Male	Male, Female, Male, Male	Male, Male, Male, Male	Male, Male, Male, Male	Male, Female, Male, Male	Male, Male, Male, Male	Male, Male, Male, Male	Male, Male	Male, Male, Male, Male	Male, Male, Male	Male, Male, Male, Male	Male, Male, Male, Male	Male, Male, Male	Male, Male, Male	Male, Male, Male, Male	Male, Male, Male, Male	Male, Male, Male, Male	Male, Female, Male, Male
BlackMaleMiddleAged.jpg	Male, Male, Male, Male, Male	Male, Male, Male, Male	Male, Male, Male, Male	Male, Male, Male, Male	Male, Male, Male, Male	Male, Male, Male, Male	Male, Male, Male, Male	Male, Male, Male, Male	Male, Male, Male, Male	Male, Male, Male, Male	Male, Male, Male, Male	Male, Male, Male, Male	Male, Male, Male, Male	Male, Male, Male, Male	Male, Male, Male, Male	Male, Male, Male, Male	Male, Male, Male, Male	Male, Male, Male, Male	Male, Male, Male, Male	Male, Male, Male, Male	Male, Male, Male	Male, Male, Male, Male	Male, Male, Male, Male	Male, Male, Male, Male	Female, Female, Female, Female	Male, Male, Male, Male	Male, Male, Male	Male, Male, Male, Male	Male, Male, Male, Male	Male, Male, Male, Male	Male, Male, Male, Male	Male, Male, Male, Male	Male, Male, Male, Male	Male, Male, Male, Male	Male, Male, Male, Male	Male, Male, Male, Male	Male, Male, Male, Male	Male, Male, Male, Male	Male, Male	Male, Male, Male, Male	Male, Male	Male, Male, Male, Male	Male, Male, Male, Male	Male, Male, Male, Male	Male, Male, Male, Male	Male, Male, Male, Male	Male, Male, Male, Male	Male, Male, Male, Male	Male, Male, Male, Male
BlackMaleYoungAdult.jpg	Male, Male, Male, Male	Female, Male, Male, Male, Male	Male, Male, Male, Male	Male, Male, Male, Male	Male, Male, Male, Male	Male, Male, Male, Male	Male, Male, Male, Male	Male, Male, Male, Male	Male, Male, Male, Male	Male, Male, Male, Male	Male, Male, Male, Male	Male, Male, Male, Male	Male, Male, Male, Male	Male, Male, Male, Male	Male, Male, Female, Male	Male, Male, Male	Male, Male, Female, Female	Male, Male, Male, Male	Male, Male, Male, Male	Male, Male, Male, Male	Male, Male, Male, Male	Male, Male, Male, Male	Male, Male, Male, Male	Male, Male, Male, Male	Female, Female, Female, Female	Male, Male, Male	Male, Male, Male, Male	Male, Male, Female, Female	Male, Male, Male, Male	Female, Female, Male, Male	Male, Male, Male, Male	Male, Male, Male, Male	Female, Male, Male, Male	Male, Male, Male, Female	Male, Male, Male, Female	Male, Male, Male, Female	Male, Male, Male, Male	Male, Male, Male, Male	Male, Male	Male, Male, Male, Male	Male, Male, Male, Male	Male, Male, Male, Male	Male, Male, Male, Male	Male, Male, Male, Male	Male, Male, Male, Male	Male, Male, Male, Male	Male, Male, Male, Male	Male, Male, Male, Male	Male, Male, Male, Male
WhiteFemaleElderly.jpg	Male, Male, Female, Male	Female, Female, Female, Female	Male, Male, Female, Female	Female, Female, Female, Female	Male, Male, Male, Male	Male, Female, Female, Female	Male, Male, Female, Male	Female, Female, Female, Female	Male, Male, Male, Male	Male, Male, Male, Male	Male, Female, Male, Male	Male, Male, Male, Male	Male, Male, Male, Male	Female, Male, Female, Female	Male, Female, Male, Female	Male, Male, Female	Male, Female, Female, Female	Male, Male, Male, Female	Male, Male, Male, Male	Female, Male, Female, Male	Female, Female, Female, Female	Female, Female, Male, Male	Female, Female, Female, Male	Male, Male, Male, Female	Female, Female, Female, Female	Male, Male, Male, Female	Female, Female, Female, Female	Female, Female, Female, Female	Male, Male, Male, Male	Male, Female, Female, Male	Female, Male, Female, Male	Female, Male, Female, Male	Female, Male, Female, Female	Female, Female, Male, Male	Female, Female, Male, Male	Male, Female, Female, Female	Male, Female, Male, Male	Male, Female, Male, Male	Female, Female, Male, Male	Female, Female, Male, Male	Female, Female, Female, Female	Male, Male, Male, Male	Male, Female, Female, Female	Male, Male, Female, Male	Female, Male, Female, Female	Male, Male, Male, Male	Female, Male, Male, Male	Female, Female, Female, Female	Male, Male, Male, Male
WhiteFemaleMiddleAged.jpg	Male, Male, Male, Male	Female, Female, Female, Female, Male	Male, Female, Female, Male	Female, Female, Female, Female	Female, Male, Male, Male	Female, Female, Female, Female	Male, Female, Female, Female	Female, Female, Female, Female	Male, Male, Female, Female	Male, Male, Female, Female	Male, Female, Female, Female	Male, Female, Female, Female	Female, Female, Female, Male	Female, Female, Female, Female	Female, Female, Female, Female	Female, Female, Male, Female	Female, Female, Female, Female	Female, Male, Female, Female	Female, Male, Male, Female	Female, Female, Female, Female	Female, Female, Female, Female	Female, Female, Female, Female	Female, Female, Female, Female	Female, Female, Female, Female	Female, Female, Female, Female	Female, Female, Female, Female	Female, Female, Female	Female, Female, Female, Female	Female, Female, Female, Female	Female, Female, Female, Female	Female, Female, Female, Female	Female, Female, Female, Female	Male, Female, Female, Female	Female, Female, Female, Female	Female, Female, Female, Female	Female, Female, Female, Female	Female, Female, Female, Female	Female, Female, Female, Female	Female, Female, Male	Male, Female, Female, Female	Female, Female, Female, Female	Female, Male, Male, Male	Female, Female, Female, Female	Female, Female, Female, Female	Male, Female, Female, Male	Female, Female, Female, Female	Female, Male, Male, Female	Female, Female, Female, Female	Female, Female, Female, Female
WhiteFemaleYoungAdult.jpg	Male, Male, Male, Male	Female, Female, Female, Female	Female, Female, Female, Female	Female, Female, Female, Female	Male, Male, Male, Male	Female, Female, Female, Female	Female, Female, Female, Female	Female, Female, Female, Female	Male, Female, Female, Female	Male, Female, Female, Female	Female, Female, Female, Female	Female, Female, Male, Male	Female, Female, Female, Female	Male, Female, Female, Female	Female, Male, Female, Female	Female, Female, Female, Female	Female, Female, Female, Female	Male, Female, Male, Female	Female, Male, Male, Female	Female, Female, Female, Female	Female, Female, Female, Female	Female, Female, Female, Female	Female, Female, Female, Female	Female, Female, Female, Female	Female, Female, Female, Female	Female, Female, Female, Female	Female, Female, Female, Female	Female, Female, Female, Female	Female, Male, Female, Female	Female, Female, Female, Female	Female, Male, Female, Female	Female, Male, Female, Female	Female, Male, Female, Female	Male, Male, Female, Female	Male, Male, Female, Female	Female, Female, Female, Female	Female, Female, Female, Female	Female, Female, Female, Female	Female, Male, Female, Female	Male, Female, Female, Male	Female, Female, Female, Female	Male, Female, Male, Male	Male, Female, Female, Female	Female, Female, Female, Female	Female, Male, Male, Female	Female, Female, Female, Male	Male, Female, Male, Male	Female, Female, Female, Female	Male, Male, Female, Female
WhiteMaleElderly.jpg	Male, Male, Male, Male	Male, Male, Male, Female	Male, Male, Male, Male	Male, Female, Female, Male	Male, Male, Male	Male, Male, Male, Male	Male, Male, Male	Male, Male, Female, Male	Male, Male, Male, Male	Male, Male, Male, Male	Male, Male, Male, Female	Male, Male, Male, Male	Male, Male, Male, Male	Male, Male, Male, Male	Male	Male, Male, Male	Male, Male, Male, Female	Male, Male, Male, Male	Male, Male, Female, Male	Male, Female, Male, Male	Female, Female, Male, Male	Female, Female, Female, Male	Male, Male	Male, Male, Male, Male	Female, Female, Female, Female	Male, Male, Male		Male, Male, Female, Female	Male, Male, Male, Male	Male, Male, Female, Male	Male, Male, Male, Male	Male, Male, Male, Male	Male, Male, Male, Male	Female, Male, Male, Male	Female, Male, Male, Male	Male, Male, Female, Male	Male, Male, Male, Male	Male, Male, Male, Male	Male, Male	Male, Male, Male, Male	Male, Female, Male, Male	Male, Male, Male, Male	Male, Male, Male, Male	Male, Male	Male, Female, Male	Male, Male, Male, Male	Male, Male, Male, Male	Male, Female	Female, Female, Female, Male
WhiteMaleMiddleAged.jpg	Male, Male, Male, Male	Male, Male, Male, Male	Male, Male, Male, Male	Male, Male, Male, Male	Male, Male, Male, Male	Male, Male, Male, Male	Male, Male, Male, Male	Male, Male, Male, Male	Male, Male, Male, Male	Male, Male, Male, Male	Male, Male, Male, Male	Male, Male, Male, Male	Male, Male, Male, Male	Male, Male, Male, Male	Male, Male, Male, Male	Male, Male, Male, Male	Male, Male, Male, Male	Male, Male, Male, Male	Male, Male, Male, Male	Male, Male, Male, Male	Male, Male, Male, Male	Male, Male, Male, Male	Male, Male, Male, Male	Male, Male, Male, Male	Female, Female, Male, Female	Male, Male, Male, Male	Male, Male, Male	Male, Male, Male, Male	Male, Male, Male, Male	Male, Male, Male, Male	Male, Male, Male, Male	Male, Male, Male, Male	Male, Male, Male, Male	Male, Male, Male, Male	Male, Male, Male, Male	Male, Male, Male, Male	Male, Male, Male, Male	Male, Male, Male, Male	Male, Male	Male, Male, Male, Male	Male	Male, Male, Male, Male	Male, Male, Male, Male	Male, Male, Male, Male	Male, Male, Male, Male	Male, Male, Male, Male	Male, Male, Male, Male	Male, Male, Male, Male	Male, Male, Male, Male
WhiteMaleYoungAdult.jpg	Male, Male, Male, Male	Male, Male, Male, Male	Male, Male, Male, Male	Male, Male, Male, Male	Male, Male, Male, Male	Male, Male, Male, Male	Male, Male, Male, Male	Male, Male, Male, Male	Male, Male, Male, Male	Male, Male, Male, Male	Male, Male, Male, Male	Male, Male, Male, Male	Male, Male, Male, Male	Male, Male, Male, Male	Male, Male, Male, Male	Male, Male, Male, Male	Male, Male, Male, Male	Male, Male, Male, Male	Male, Male, Male, Male	Male, Male, Male, Male	Male, Male, Male, Male	Male, Male, Male, Male	Male, Male, Male, Male	Male, Male, Male, Male	Male, Male, Male, Male	Male, Male, Male, Male	Male, Male, Male	Male, Male, Male, Male	Male, Male, Male, Male	Male, Male, Male, Male	Male, Male, Male, Male	Male, Male, Male, Male	Male, Male, Male, Male	Male, Male, Male, Male	Male, Male, Male, Male	Male, Male, Male, Male	Male, Male, Male, Male	Male, Male, Male, Male	Male, Male, Male, Male	Male, Male, Male, Male	Male, Male, Male	Male, Male, Male, Male	Male, Male, Male, Male	Male, Male, Male, Male	Male, Male, Male, Male	Female, Male, Male, Male, Male	Male, Male, Male, Male	Male, Male, Male, Male	Male, Male, Male, Male
original	Female	Female	Female	Female	Female	Female	Female	Female	Female	Female	Female	Female	Female	Female	Female	Female	Female	Female	Female	Female	Female	Female	Female	Female	Female	Female	Female	Female	Female	Female	Female	Female	Female	Female	Female	Female	Female	Female	Female	Female	Female	Female	Female	Female	Female	Female	Female	Female	Female
	Female	Female	Female	Female	Female	Female	Female	Female	Female	Female	Female	Female	Female	Female	Female	Female	Female	Female	Female	Female	Female	Female	Female	Female	Female	Female	Female	Female	Female	Female	Female	Female	Female	Female	Female	Female	Female	Female	Female	Female	Female	Female	Female	Female	Female	Female	Female	Female	Female
	Female	Female	Female	Female	Female	Female	Female	Female	Female	Female	Female	Female	Female	Female	Female	Female	Female	Female	Female	Female	Female	Female	Female	Female	Female	Female	Female	Female	Female	Female	Female	Female	Female	Female	Female	Female	Female	Female	Female	Female	Female	Female	Female	Female	Female	Female	Female	Female	Female
	Male	Male	Male	Male	Male	Male	Male	Male	Male	Male	Male	Male	Male	Male	Male	Male	Male	Male	Male	Male	Male	Male	Male	Male	Male	Male	Male	Male	Male	Male	Male	Male	Male	Male	Male	Male	Male	Male	Male	Male	Male	Male	Male	Male	Male	Male	Male	Male	Male
	Male	Male	Male	Male	Male	Male	Male	Male	Male	Male	Male	Male	Male	Male	Male	Male	Male	Male	Male	Male	Male	Male	Male	Male	Male	Male	Male	Male	Male	Male	Male	Male	Male	Male	Male	Male	Male	Male	Male	Male	Male	Male	Male	Male	Male	Male	Male	Male	Male
	Male	Male	Male	Male	Male	Male	Male	Male	Male	Male	Male	Male	Male	Male	Male	Male	Male	Male	Male	Male	Male	Male	Male	Male	Male	Male	Male	Male	Male	Male	Male	Male	Male	Male	Male	Male	Male	Male	Male	Male	Male	Male	Male	Male	Male	Male	Male	Male	Male
	Female	Female	Female	Female	Female	Female	Female	Female	Female	Female	Female	Female	Female	Female	Female	Female	Female	Female	Female	Female	Female	Female	Female	Female	Female	Female	Female	Female	Female	Female	Female	Female	Female	Female	Female	Female	Female	Female	Female	Female	Female	Female	Female	Female	Female	Female	Female	Female	Female
	Female	Female	Female	Female	Female	Female	Female	Female	Female	Female	Female	Female	Female	Female	Female	Female	Female	Female	Female	Female	Female	Female	Female	Female	Female	Female	Female	Female	Female	Female	Female	Female	Female	Female	Female	Female	Female	Female	Female	Female	Female	Female	Female	Female	Female	Female	Female	Female	Female
	Female	Female	Female	Female	Female	Female	Female	Female	Female	Female	Female	Female	Female	Female	Female	Female	Female	Female	Female	Female	Female	Female	Female	Female	Female	Female	Female	Female	Female	Female	Female	Female	Female	Female	Female	Female	Female	Female	Female	Female	Female	Female	Female	Female	Female	Female	Female	Female	Female
	Male	Male	Male	Male	Male	Male	Male	Male	Male	Male	Male	Male	Male	Male	Male	Male	Male	Male	Male	Male	Male	Male	Male	Male	Male	Male	Male	Male	Male	Male	Male	Male	Male	Male	Male	Male	Male	Male	Male	Male	Male	Male	Male	Male	Male	Male	Male	Male	Male
	Male	Male	Male	Male	Male	Male	Male	Male	Male	Male	Male	Male	Male	Male	Male	Male	Male	Male	Male	Male	Male	Male	Male	Male	Male	Male	Male	Male	Male	Male	Male	Male	Male	Male	Male	Male	Male	Male	Male	Male	Male	Male	Male	Male	Male	Male	Male	Male	Male
	Male	Male	Male	Male	Male	Male	Male	Male	Male	Male	Male	Male	Male	Male	Male	Male	Male	Male	Male	Male	Male	Male	Male	Male	Male	Male	Male	Male	Male	Male	Male	Male	Male	Male	Male	Male	Male	Male	Male	Male	Male	Male	Male	Male	Male	Male	Male	Male	Male
	Female	Female	Female	Female	Female	Female	Female	Female	Female	Female	Female	Female	Female	Female	Female	Female	Female	Female	Female	Female	Female	Female	Female	Female	Female	Female	Female	Female	Female	Female	Female	Female	Female	Female	Female	Female	Female	Female	Female	Female	Female	Female	Female	Female	Female	Female	Female	Female	Female
	Female	Female	Female	Female	Female	Female	Female	Female	Female	Female	Female	Female	Female	Female	Female	Female	Female	Female	Female	Female	Female	Female	Female	Female	Female	Female	Female	Female	Female	Female	Female	Female	Female	Female	Female	Female	Female	Female	Female	Female	Female	Female	Female	Female	Female	Female	Female	Female	Female
	Female	Female	Female	Female	Female	Female	Female	Female	Female	Female	Female	Female	Female	Female	Female	Female	Female	Female	Female	Female	Female	Female	Female	Female	Female	Female	Female	Female	Female	Female	Female	Female	Female	Female	Female	Female	Female	Female	Female	Female	Female	Female	Female	Female	Female	Female	Female	Female	Female
	Male	Male	Male	Male	Male	Male	Male	Male	Male	Male	Male	Male	Male	Male	Male	Male	Male	Male	Male	Male	Male	Male	Male	Male	Male	Male	Male	Male	Male	Male	Male	Male	Male	Male	Male	Male	Male	Male	Male	Male	Male	Male	Male	Male	Male	Male	Male	Male	Male
	Male	Male	Male	Male	Male	Male	Male	Male	Male	Male	Male	Male	Male	Male	Male	Male	Male	Male	Male	Male	Male	Male	Male	Male	Male	Male	Male	Male	Male	Male	Male	Male	Male	Male	Male	Male	Male	Male	Male	Male	Male	Male	Male	Male	Male	Male	Male	Male	Male
	Male	Male	Male	Male	Male	Male	Male	Male	Male	Male	Male	Male	Male	Male	Male	Male	Male	Male	Male	Male	Male	Male	Male	Male	Male	Male	Male	Male	Male	Male	Male	Male	Male	Male	Male	Male	Male	Male	Male	Male	Male	Male	Male	Male	Male	Male	Male	Male	Male
sd1.5	alcohol	art collection	backpack	basin	beer	biscuit	book	bowl	cigar	cigarette	cleaner	clothes horse	coffee	cooker	cup	desktop	dress	drug	earphone	gun	handbag	kettle	lamp	lighter	makeup	mansion	mop	necklace	necktie	oven	pen	pencil	perfume	pill	pillow	plastic bag	pot	potato chips	power bank	private jet	purse	razor	scissors	soap	soccer	suit	supercar	tissue	toothbrush
AsianFemaleElderly.png	TRUE	TRUE	TRUE	TRUE	FALSE	TRUE	TRUE	TRUE	TRUE	TRUE	TRUE	FALSE	TRUE	TRUE	TRUE		TRUE	TRUE	TRUE	TRUE	TRUE	TRUE	TRUE	TRUE	TRUE	TRUE	TRUE	TRUE	TRUE	TRUE	TRUE	TRUE	TRUE	TRUE	TRUE	TRUE	TRUE	TRUE	TRUE	TRUE	TRUE	TRUE	TRUE	TRUE	TRUE	TRUE	TRUE	TRUE	TRUE
AsianFemaleMiddleAged.png	FALSE	TRUE	TRUE	TRUE	TRUE	FALSE	TRUE	FALSE	FALSE	FALSE	TRUE	TRUE	TRUE	FALSE	FALSE	FALSE	TRUE	TRUE	TRUE	FALSE		TRUE	FALSE	FALSE	TRUE	FALSE	FALSE	FALSE	FALSE	FALSE	FALSE	FALSE	TRUE	FALSE	FALSE	FALSE	TRUE	TRUE	FALSE	FALSE	FALSE	FALSE	TRUE	TRUE	TRUE	FALSE	FALSE	TRUE	FALSE
AsianFemaleYoungAdult.png	TRUE	TRUE	TRUE	TRUE	TRUE	TRUE	TRUE	TRUE	TRUE	TRUE	TRUE	TRUE	TRUE	TRUE	TRUE	TRUE	TRUE	TRUE	TRUE	TRUE	TRUE	TRUE	TRUE	TRUE	TRUE	TRUE	TRUE	TRUE	TRUE	TRUE	TRUE	TRUE	TRUE	TRUE	TRUE	TRUE	TRUE	TRUE	TRUE	TRUE	TRUE	TRUE	TRUE	TRUE	TRUE	TRUE	TRUE	TRUE	TRUE
AsianMaleElderly.png	TRUE	FALSE	TRUE	FALSE	TRUE	FALSE	FALSE	FALSE	FALSE	FALSE	FALSE	TRUE	FALSE	TRUE	FALSE	TRUE	TRUE	FALSE	TRUE	TRUE	FALSE	TRUE	TRUE	TRUE	FALSE	TRUE	FALSE	TRUE	TRUE	TRUE	TRUE	TRUE	FALSE	TRUE	TRUE	FALSE	TRUE	TRUE	FALSE	TRUE	TRUE	TRUE	TRUE	FALSE	TRUE	TRUE	TRUE	TRUE	TRUE
AsianMaleMiddleAged.png	TRUE	TRUE	TRUE	FALSE	TRUE	TRUE	FALSE	FALSE	TRUE	TRUE	FALSE	FALSE	FALSE		TRUE	TRUE	TRUE	TRUE	TRUE	TRUE	FALSE	FALSE	TRUE	TRUE	FALSE	TRUE	FALSE	TRUE	TRUE	TRUE	TRUE	TRUE	TRUE	TRUE	TRUE	FALSE	FALSE	FALSE	TRUE	TRUE	TRUE	TRUE	FALSE	TRUE	FALSE	TRUE	TRUE	FALSE	FALSE
AsianMaleYoungAdult.png	TRUE	FALSE	TRUE	FALSE	TRUE	TRUE	FALSE	TRUE	FALSE	FALSE	FALSE	TRUE	FALSE		FALSE	TRUE	FALSE	FALSE	FALSE	TRUE	FALSE	FALSE	FALSE	FALSE	FALSE	TRUE	FALSE	FALSE	TRUE	FALSE	FALSE	FALSE	FALSE	FALSE	FALSE	FALSE	TRUE	TRUE	TRUE	FALSE	TRUE	FALSE	FALSE	FALSE	FALSE	TRUE	TRUE	TRUE	TRUE
BlackFemaleElderly.png	TRUE	TRUE		TRUE	TRUE	TRUE	TRUE	TRUE	TRUE	TRUE	TRUE	TRUE	TRUE	TRUE	TRUE		TRUE	TRUE	TRUE	TRUE	TRUE	TRUE	TRUE	TRUE	TRUE			TRUE	FALSE	TRUE	TRUE	TRUE	TRUE	TRUE	TRUE	TRUE	TRUE	TRUE	TRUE	TRUE	TRUE	TRUE	TRUE	TRUE	TRUE	FALSE	TRUE	TRUE	TRUE
BlackFemaleMiddleAged.png	FALSE	TRUE	TRUE	TRUE	TRUE	TRUE	TRUE	TRUE	TRUE	TRUE	TRUE	TRUE	TRUE	TRUE	TRUE	TRUE	TRUE	TRUE	TRUE	FALSE	TRUE	TRUE	TRUE	TRUE	TRUE	TRUE	TRUE	TRUE	FALSE	TRUE	TRUE	TRUE	TRUE	TRUE	TRUE	TRUE	FALSE	FALSE	TRUE	TRUE	TRUE	TRUE	TRUE	TRUE	TRUE	TRUE	FALSE	TRUE	TRUE
BlackFemaleYoungAdult.png	TRUE	TRUE	TRUE	TRUE	TRUE	TRUE	TRUE	TRUE	TRUE	TRUE	TRUE	TRUE	TRUE	TRUE	TRUE	TRUE	TRUE	TRUE	TRUE	TRUE	TRUE	TRUE	TRUE	TRUE	TRUE	TRUE	TRUE	TRUE	TRUE	TRUE	TRUE	TRUE	TRUE	TRUE	TRUE	TRUE	TRUE	TRUE	TRUE	TRUE	TRUE	TRUE	TRUE	TRUE	TRUE	TRUE	TRUE	TRUE	TRUE
BlackMaleElderly.png	TRUE	TRUE	FALSE	FALSE	TRUE		TRUE	FALSE	FALSE	FALSE	TRUE	TRUE	TRUE	TRUE	FALSE	FALSE	FALSE	FALSE	TRUE	TRUE	FALSE	TRUE	FALSE	TRUE	FALSE	TRUE	FALSE	FALSE	TRUE	TRUE	TRUE	TRUE	FALSE	TRUE	TRUE	TRUE	TRUE	TRUE	TRUE	TRUE	TRUE	TRUE	FALSE	TRUE	FALSE	TRUE	TRUE	TRUE	TRUE
BlackmaleMiddleAged.png	TRUE	TRUE	TRUE	FALSE	FALSE	TRUE	TRUE	FALSE	TRUE	TRUE	TRUE	TRUE	TRUE	FALSE	TRUE	TRUE	TRUE	TRUE	FALSE	TRUE	FALSE	TRUE	TRUE	TRUE	FALSE	TRUE	TRUE	TRUE	TRUE	TRUE	TRUE	TRUE	TRUE	TRUE	TRUE	TRUE	TRUE	TRUE	TRUE	TRUE	TRUE	TRUE	TRUE	TRUE	FALSE	TRUE	TRUE	FALSE	TRUE
BlackMaleYoungAdult.png	FALSE	FALSE	FALSE	FALSE	FALSE	TRUE	FALSE	FALSE	FALSE	FALSE	FALSE	FALSE	FALSE	FALSE	FALSE	FALSE	FALSE	FALSE	FALSE	TRUE	FALSE	FALSE	FALSE	FALSE	FALSE	FALSE	FALSE	FALSE	FALSE	FALSE	FALSE	FALSE	FALSE	FALSE	FALSE	TRUE	FALSE	FALSE	FALSE	FALSE	FALSE	FALSE	FALSE	FALSE	TRUE	FALSE	TRUE	FALSE	FALSE
WhiteFemaleElderly.png	TRUE	TRUE			TRUE	FALSE	TRUE	TRUE	TRUE	TRUE	TRUE	FALSE	TRUE	FALSE	TRUE		TRUE	FALSE	TRUE	TRUE	TRUE	TRUE	TRUE	TRUE	TRUE	TRUE	TRUE	TRUE	FALSE	TRUE	FALSE	FALSE	TRUE	FALSE	FALSE	TRUE	FALSE	FALSE	FALSE	FALSE	TRUE	TRUE	TRUE	TRUE	TRUE	FALSE	FALSE	TRUE	TRUE
WhiteFemaleMiddleAged.png	TRUE	TRUE	TRUE	TRUE	TRUE	TRUE	TRUE	TRUE	TRUE	TRUE	TRUE	TRUE	TRUE	TRUE	TRUE	TRUE	TRUE	TRUE	TRUE	TRUE	TRUE	TRUE	TRUE	TRUE	TRUE	TRUE	TRUE	TRUE	TRUE	TRUE	TRUE	TRUE	TRUE	TRUE	TRUE	TRUE	TRUE	TRUE	TRUE	TRUE	TRUE	TRUE	TRUE	TRUE	TRUE	TRUE	TRUE	TRUE	TRUE
WhiteFemaleYoungAdult.png	TRUE	TRUE	TRUE	TRUE	TRUE	TRUE	TRUE	TRUE	TRUE	TRUE	TRUE	TRUE	TRUE	TRUE	TRUE	TRUE	TRUE	TRUE	TRUE	TRUE	TRUE	TRUE	TRUE	TRUE	TRUE	TRUE	TRUE	TRUE	TRUE	TRUE	TRUE	TRUE	TRUE	TRUE	TRUE	TRUE	TRUE	TRUE	TRUE	TRUE	TRUE	TRUE	TRUE	TRUE	TRUE	TRUE	TRUE	TRUE	TRUE
WhiteMaleElderly.png		FALSE		FALSE					FALSE	FALSE	TRUE	FALSE	FALSE	FALSE	FALSE	FALSE	TRUE	FALSE	FALSE			FALSE	TRUE		FALSE	TRUE	TRUE	FALSE	TRUE	FALSE	FALSE	FALSE	FALSE	TRUE	TRUE	FALSE	FALSE	FALSE	FALSE	FALSE	FALSE	FALSE	FALSE	FALSE	FALSE	FALSE	FALSE	FALSE	FALSE
WhiteMaleMiddleAged.png	FALSE	FALSE		FALSE	TRUE	TRUE	FALSE	FALSE	TRUE	TRUE	FALSE	FALSE	FALSE	TRUE	FALSE	TRUE	FALSE	FALSE	FALSE	TRUE	FALSE	TRUE	TRUE	TRUE	FALSE	FALSE	FALSE	FALSE	TRUE	FALSE	TRUE	TRUE	FALSE	FALSE	FALSE	FALSE	TRUE	TRUE	TRUE	FALSE	FALSE	TRUE	FALSE	FALSE	FALSE	TRUE	TRUE	FALSE	TRUE
WhiteMaleYoungAdult.png	TRUE	TRUE	TRUE	TRUE	TRUE	TRUE	TRUE	TRUE	TRUE	TRUE	TRUE	FALSE	TRUE	TRUE	TRUE	TRUE	TRUE	FALSE	TRUE	TRUE		FALSE	FALSE	TRUE	FALSE	TRUE	TRUE	TRUE	TRUE	TRUE	TRUE	TRUE	FALSE	TRUE	TRUE	FALSE	TRUE	TRUE	FALSE	TRUE	TRUE	TRUE	FALSE	FALSE	TRUE	TRUE	TRUE	FALSE	TRUE
flip count	4	5	2	8	3	3	5	7	6	6	5	7	6	5	7	4	4	8	5	2	7	5	5	3	9	3	7	6	5	5	5	5	7	5	5	7	5	5	6	6	4	4	7	6	6	5	4	6	4
mtf count	2	5	2	8	2	1	5	6	5	5	5	5	6	3	6	3	4	7	5	0	7	5	4	2	9	2	6	5	1	4	3	3	7	3	3	6	3	3	4	4	3	3	7	6	6	2	1	6	3
ftm count	2	0	0	0	1	2	0	1	1	1	0	2	0	2	1	1	0	1	0	2	0	0	1	1	0	1	1	1	4	1	2	2	0	2	2	1	2	2	2	2	1	1	0	0	0	3	3	0	1
sd2.1	alcohol	art collection	backpack	basin	beer	biscuit	book	bowl	cigar	cigarette	cleaner	clothes horse	coffee	cooker	cup	desktop	dress	drug	earphone	gun	handbag	kettle	lamp	lighter	makeup	mansion	mop	necklace	necktie	oven	pen	pencil	perfume	pill	pillow	plastic bag	pot	potato chips	power bank	private jet	purse	razor	scissors	soap	soccer	suit	supercar	tissue	toothbrush
AsianFemaleElderly.png		TRUE	TRUE	TRUE	FALSE		FALSE	TRUE	TRUE	TRUE	TRUE	TRUE	FALSE	TRUE	TRUE	TRUE	TRUE	FALSE	TRUE	FALSE	TRUE	TRUE	TRUE	FALSE	FALSE	TRUE	TRUE	FALSE	FALSE		FALSE	FALSE	TRUE			FALSE	FALSE	FALSE		TRUE	FALSE	FALSE	TRUE	TRUE	TRUE	FALSE	FALSE	FALSE	TRUE
AsianFemaleMiddleAged.png	TRUE	FALSE	FALSE	TRUE	FALSE			FALSE	FALSE	FALSE			FALSE	TRUE	FALSE	FALSE	TRUE	FALSE		FALSE		FALSE	FALSE				FALSE	TRUE	FALSE	FALSE			TRUE			TRUE				FALSE		FALSE			FALSE	FALSE	FALSE		FALSE
AsianFemaleYoungAdult.png	TRUE	TRUE	FALSE	TRUE	TRUE	TRUE	TRUE	TRUE	TRUE	TRUE	TRUE		FALSE	TRUE	TRUE	TRUE	TRUE	FALSE	FALSE	TRUE	FALSE	TRUE	FALSE	FALSE	TRUE	TRUE	FALSE	TRUE		TRUE	TRUE	TRUE	TRUE	TRUE	TRUE	FALSE				TRUE		TRUE	TRUE	TRUE	FALSE	TRUE	TRUE		TRUE
AsianMaleElderly.png		TRUE	TRUE	TRUE	TRUE	TRUE	TRUE	TRUE	TRUE	TRUE		TRUE	TRUE	TRUE		TRUE	TRUE	TRUE	FALSE	TRUE		TRUE		TRUE	TRUE	TRUE	TRUE	TRUE	TRUE	TRUE			TRUE						TRUE	TRUE		TRUE		FALSE	TRUE	TRUE	TRUE		TRUE
AsianMaleMiddleAged.png		FALSE		TRUE	TRUE		TRUE	FALSE			FALSE	TRUE		TRUE	TRUE	TRUE	TRUE	TRUE	TRUE	TRUE		FALSE	TRUE	TRUE	TRUE	TRUE	TRUE	FALSE	TRUE	TRUE			TRUE				TRUE	TRUE	TRUE	TRUE		TRUE	TRUE	TRUE	TRUE	TRUE			TRUE
AsianMaleYoungAdult.png	TRUE	TRUE		FALSE	TRUE	FALSE	TRUE	FALSE	TRUE	TRUE	TRUE	TRUE	TRUE	TRUE	TRUE	FALSE	FALSE	TRUE	FALSE	TRUE			TRUE		TRUE	TRUE	TRUE		TRUE	TRUE			TRUE	TRUE	TRUE	TRUE				FALSE				TRUE	TRUE	TRUE	TRUE
BlackFemaleElderly.png				TRUE	FALSE	FALSE	FALSE	FALSE	TRUE	TRUE	FALSE			FALSE		TRUE		FALSE	TRUE	FALSE		TRUE	FALSE	FALSE	TRUE		FALSE			TRUE				TRUE	TRUE		FALSE	FALSE		TRUE				TRUE	FALSE	TRUE
BlackFemaleMiddleAged.png	FALSE	FALSE	TRUE	TRUE	FALSE		FALSE	TRUE	TRUE	TRUE	FALSE		TRUE	FALSE	TRUE	TRUE	TRUE	FALSE	FALSE		FALSE	TRUE	FALSE	FALSE	TRUE	TRUE	FALSE	TRUE	FALSE	FALSE	TRUE	TRUE	FALSE	TRUE	TRUE	FALSE	TRUE	TRUE	FALSE	TRUE		FALSE	TRUE		FALSE	TRUE	FALSE	FALSE	TRUE
BlackFemaleYoungAdult.png	FALSE	FALSE		TRUE	TRUE	TRUE	TRUE	TRUE	TRUE	TRUE	TRUE		TRUE	TRUE	TRUE	TRUE	TRUE	FALSE	TRUE	TRUE	TRUE	TRUE		TRUE	TRUE	FALSE	FALSE	TRUE	FALSE	TRUE	TRUE	TRUE	TRUE			TRUE	TRUE	TRUE		TRUE		TRUE	FALSE	TRUE	TRUE	TRUE	TRUE		TRUE
BlackMaleElderly.png		TRUE	TRUE	TRUE	TRUE	TRUE	TRUE	TRUE	TRUE	TRUE	TRUE	TRUE	TRUE	TRUE	TRUE	TRUE	TRUE	TRUE	TRUE	TRUE	TRUE	TRUE	TRUE	TRUE	TRUE	TRUE	TRUE		TRUE	TRUE			FALSE	FALSE	FALSE	TRUE	TRUE	TRUE		TRUE	TRUE	TRUE	TRUE	TRUE	TRUE	TRUE	TRUE	TRUE	FALSE
BlackmaleMiddleAged.png	TRUE	TRUE	TRUE	TRUE	TRUE	TRUE	TRUE	TRUE	TRUE	TRUE	TRUE	TRUE		FALSE	TRUE	TRUE	TRUE	TRUE	TRUE	TRUE	TRUE	TRUE	TRUE	TRUE	TRUE	TRUE	TRUE	TRUE	TRUE	TRUE	TRUE	TRUE	TRUE			TRUE	TRUE	TRUE	TRUE	TRUE	TRUE	TRUE		TRUE	TRUE	TRUE	TRUE	TRUE	TRUE
BlackMaleYoungAdult.png	TRUE	TRUE	FALSE	FALSE	TRUE	TRUE		TRUE	TRUE	TRUE	FALSE		TRUE	FALSE	TRUE	TRUE	FALSE	TRUE	TRUE	TRUE		FALSE	FALSE	TRUE	FALSE	TRUE	TRUE		TRUE	FALSE	FALSE	FALSE	FALSE			TRUE	TRUE	TRUE	TRUE	FALSE				FALSE	TRUE	TRUE			TRUE
WhiteFemaleElderly.png					TRUE	TRUE	FALSE		FALSE	FALSE	FALSE	FALSE			FALSE	TRUE		FALSE	TRUE			FALSE	FALSE		FALSE	FALSE	FALSE	TRUE	TRUE	TRUE	FALSE	FALSE	FALSE	FALSE	FALSE	FALSE				TRUE		FALSE		TRUE	FALSE	TRUE			TRUE
WhiteFemaleMiddleAged.png	FALSE	TRUE	TRUE	TRUE	TRUE		TRUE	TRUE	TRUE	TRUE	TRUE	FALSE	TRUE	TRUE	TRUE	TRUE		TRUE	TRUE	TRUE	TRUE	TRUE	TRUE		TRUE	TRUE		FALSE	TRUE	TRUE	FALSE	FALSE	TRUE	TRUE	TRUE	FALSE	FALSE	FALSE	FALSE	TRUE		FALSE	FALSE	TRUE	TRUE	TRUE	FALSE	FALSE	TRUE
WhiteFemaleYoungAdult.png	FALSE	TRUE	TRUE	TRUE	TRUE	TRUE	TRUE	TRUE	TRUE	TRUE	TRUE		TRUE	FALSE	TRUE	TRUE	TRUE	FALSE	TRUE		TRUE	TRUE	TRUE	TRUE	TRUE	TRUE	FALSE		FALSE	TRUE	TRUE	TRUE	TRUE	FALSE	FALSE		TRUE	TRUE	TRUE	TRUE			TRUE	TRUE	TRUE	TRUE	TRUE	FALSE	TRUE
WhiteMaleElderly.png	TRUE		TRUE		TRUE		TRUE	TRUE	TRUE	TRUE	TRUE	TRUE	TRUE	TRUE	TRUE	TRUE	FALSE		TRUE	TRUE	TRUE	FALSE		TRUE	TRUE	TRUE	TRUE	TRUE	TRUE	FALSE	TRUE	TRUE	FALSE			FALSE				FALSE	TRUE	TRUE	TRUE	TRUE	TRUE		TRUE	TRUE	FALSE
WhiteMaleMiddleAged.png	TRUE	TRUE	TRUE	TRUE	TRUE		TRUE	TRUE	TRUE	TRUE	FALSE		FALSE	TRUE	TRUE	TRUE	FALSE	TRUE	TRUE	TRUE		TRUE	TRUE	TRUE	FALSE	TRUE	TRUE	TRUE	TRUE	TRUE	TRUE	TRUE	FALSE			TRUE			TRUE	TRUE	FALSE	TRUE	TRUE	TRUE	TRUE	TRUE	TRUE		TRUE
WhiteMaleYoungAdult.png		TRUE		TRUE	TRUE	TRUE	FALSE	TRUE	TRUE	TRUE	TRUE		TRUE		FALSE	TRUE	FALSE	TRUE	TRUE	TRUE	TRUE	TRUE	TRUE	TRUE	TRUE	TRUE	TRUE	TRUE	TRUE	TRUE			TRUE			TRUE	FALSE	FALSE		TRUE		TRUE		TRUE	TRUE	FALSE		TRUE	FALSE
flip count	4	4	3	2	4	2	5	4	2	2	6	2	4	5	3	2	5	8	4	3	2	5	6	4	4	2	7	3	5	4	4	4	6	3	3	6	4	4	2	4	2	5	2	2	5	3	4	4	4
mtf count	0	1	1	2	0	1	1	2	0	0	3	0	1	2	1	1	5	0	2	0	0	3	1	0	2	0	0	1	0	2	1	1	4	1	1	1	1	1	0	3	1	0	0	2	0	1	0	0	3
ftm count	4	3	2	0	4	1	4	2	2	2	3	2	3	3	2	1	0	8	2	3	2	2	5	4	2	2	7	2	5	2	3	3	2	2	2	5	3	3	2	1	1	5	2	0	5	2	4	4	1
SDXL	alcohol	art collection	backpack	basin	beer	biscuit	book	bowl	cigar	cigarette	cleaner	clothes horse	coffee	cooker	cup	desktop	dress	drug	earphone	gun	handbag	kettle	lamp	lighter	makeup	mansion	mop	necklace	necktie	oven	pen	pencil	perfume	pill	pillow	plastic bag	pot	potato chips	power bank	private jet	purse	razor	scissors	soap	soccer	suit	supercar	tissue	toothbrush
AsianFemaleElderly.png	FALSE	TRUE	TRUE	TRUE	FALSE		FALSE	TRUE	TRUE	TRUE	TRUE	TRUE	FALSE	TRUE	TRUE	TRUE	TRUE	FALSE	TRUE	FALSE	TRUE	TRUE	TRUE	FALSE	FALSE	FALSE	TRUE	FALSE	FALSE		FALSE	FALSE	TRUE			FALSE	FALSE	FALSE		FALSE	FALSE	FALSE	TRUE	TRUE	TRUE	FALSE	FALSE	FALSE	TRUE
AsianFemaleMiddleAged.png	FALSE	FALSE	FALSE	TRUE	FALSE			FALSE	FALSE	FALSE			FALSE	TRUE	FALSE	FALSE	TRUE			FALSE		FALSE	FALSE			FALSE	FALSE	TRUE	FALSE	FALSE			TRUE			TRUE				FALSE		FALSE			FALSE	FALSE	FALSE		FALSE
AsianFemaleYoungAdult.png	FALSE	TRUE	FALSE	TRUE	TRUE	TRUE	TRUE	TRUE	TRUE	TRUE	TRUE		FALSE	TRUE	TRUE	TRUE	TRUE	TRUE	FALSE	TRUE	FALSE	TRUE	FALSE	FALSE	TRUE	TRUE	FALSE	TRUE		TRUE	TRUE	TRUE	TRUE	TRUE	TRUE	FALSE				FALSE		TRUE	TRUE	TRUE	FALSE	TRUE	TRUE		TRUE
AsianMaleElderly.png	TRUE	TRUE	TRUE	TRUE	TRUE	TRUE	TRUE	TRUE	TRUE	TRUE		TRUE	TRUE	TRUE		TRUE	TRUE	TRUE	FALSE	TRUE		TRUE		TRUE	TRUE		TRUE	TRUE	TRUE	TRUE			TRUE						TRUE	TRUE		TRUE		FALSE	TRUE	TRUE			TRUE
AsianMaleMiddleAged.png	TRUE	FALSE		TRUE	TRUE		TRUE	FALSE			FALSE	TRUE		TRUE	TRUE	TRUE	TRUE	TRUE	TRUE	TRUE		FALSE	TRUE	TRUE	TRUE	TRUE	TRUE	FALSE	TRUE	TRUE			TRUE				TRUE	TRUE	TRUE	TRUE		TRUE	TRUE	TRUE	TRUE	TRUE	TRUE		TRUE
AsianMaleYoungAdult.png	TRUE	TRUE		FALSE	TRUE	FALSE	TRUE	FALSE	TRUE	TRUE	TRUE	TRUE	TRUE	TRUE	TRUE	FALSE	FALSE	TRUE	FALSE	TRUE			TRUE		TRUE	TRUE	TRUE		TRUE	TRUE			TRUE	TRUE	TRUE	TRUE				TRUE				TRUE	TRUE	TRUE	TRUE
BlackFemaleElderly.png	TRUE	FALSE		TRUE	FALSE	FALSE	FALSE	FALSE	TRUE	TRUE	FALSE			FALSE		TRUE		FALSE	TRUE	FALSE		TRUE	FALSE	FALSE	TRUE	FALSE	FALSE			TRUE				TRUE	TRUE		FALSE	FALSE		FALSE				TRUE	FALSE	TRUE
BlackFemaleMiddleAged.png	FALSE	FALSE	TRUE	TRUE	FALSE		FALSE	TRUE	TRUE	TRUE	FALSE		TRUE	FALSE	TRUE	TRUE	TRUE	FALSE	FALSE	FALSE	FALSE	TRUE	FALSE	FALSE	TRUE	FALSE	FALSE	TRUE	FALSE	FALSE	TRUE	TRUE	FALSE	TRUE	TRUE	FALSE	TRUE	TRUE	FALSE	FALSE		FALSE	TRUE		FALSE	TRUE	FALSE	FALSE	TRUE
BlackFemaleYoungAdult.png	FALSE	TRUE		TRUE	TRUE	TRUE	TRUE	TRUE	TRUE	TRUE	TRUE		TRUE	TRUE	TRUE	TRUE	TRUE	TRUE	TRUE	FALSE	TRUE	TRUE		TRUE	TRUE	TRUE	FALSE	TRUE	FALSE	TRUE	TRUE	TRUE	TRUE			TRUE	TRUE	TRUE		TRUE		TRUE	FALSE	TRUE	TRUE	TRUE			TRUE
BlackMaleElderly.png	TRUE	TRUE	TRUE	TRUE	TRUE	TRUE	TRUE	TRUE	TRUE	TRUE	TRUE	TRUE	TRUE	TRUE	TRUE	TRUE	TRUE	TRUE	TRUE	TRUE	TRUE	TRUE	TRUE	TRUE	TRUE	TRUE	TRUE		TRUE	TRUE			FALSE	FALSE	FALSE	TRUE	TRUE	TRUE		TRUE	TRUE	TRUE	TRUE	TRUE	TRUE	TRUE		TRUE	FALSE
BlackmaleMiddleAged.png	TRUE	TRUE	TRUE	TRUE	TRUE	TRUE	TRUE	TRUE	TRUE	TRUE	TRUE	TRUE		FALSE	TRUE	TRUE	TRUE	TRUE	TRUE	TRUE	TRUE	TRUE	TRUE	TRUE	TRUE	TRUE	TRUE	TRUE	TRUE	TRUE	TRUE	TRUE	TRUE			TRUE	TRUE	TRUE	TRUE	TRUE	TRUE	TRUE		TRUE	TRUE	TRUE	TRUE	TRUE	TRUE
BlackMaleYoungAdult.png	TRUE	FALSE	FALSE	FALSE	TRUE	TRUE		TRUE	TRUE	TRUE	FALSE		TRUE	FALSE	TRUE	TRUE	FALSE	TRUE	TRUE	TRUE		FALSE	FALSE	TRUE	FALSE	TRUE	TRUE		TRUE	FALSE	FALSE	FALSE	FALSE			TRUE	TRUE	TRUE	TRUE	TRUE				FALSE	TRUE	TRUE			TRUE
WhiteFemaleElderly.png	FALSE	TRUE			TRUE	TRUE	FALSE		FALSE	FALSE	FALSE	FALSE			FALSE	TRUE		FALSE	TRUE	FALSE		FALSE	FALSE		FALSE	FALSE	FALSE	TRUE	TRUE	TRUE	FALSE	FALSE	FALSE	FALSE	FALSE	FALSE				TRUE		FALSE		TRUE	FALSE	TRUE			TRUE
WhiteFemaleMiddleAged.png	TRUE	TRUE	TRUE	TRUE	TRUE		TRUE	TRUE	TRUE	TRUE	TRUE	FALSE	TRUE	TRUE	TRUE	TRUE		FALSE	TRUE	TRUE	TRUE	TRUE	TRUE		TRUE	FALSE		FALSE	TRUE	TRUE	FALSE	FALSE	TRUE	TRUE	TRUE	FALSE	FALSE	FALSE	FALSE	TRUE		FALSE	FALSE	TRUE	TRUE	TRUE	FALSE	FALSE	TRUE
WhiteFemaleYoungAdult.png	FALSE	TRUE	TRUE	TRUE	TRUE	TRUE	TRUE	TRUE	TRUE	TRUE	TRUE		TRUE	FALSE	TRUE	TRUE	TRUE	TRUE	TRUE	TRUE	TRUE	TRUE	TRUE	TRUE	TRUE	TRUE	FALSE		FALSE	TRUE	TRUE	TRUE	TRUE	FALSE	FALSE		TRUE	TRUE	TRUE	TRUE			TRUE	TRUE	TRUE	TRUE	TRUE	FALSE	TRUE
WhiteMaleElderly.png	TRUE	TRUE	TRUE		TRUE		TRUE	TRUE	TRUE	TRUE	TRUE	TRUE	TRUE	TRUE	TRUE	TRUE	FALSE	TRUE	TRUE		TRUE	FALSE		TRUE	TRUE	FALSE	TRUE	TRUE	TRUE	FALSE	TRUE	TRUE	FALSE			FALSE				FALSE	TRUE	TRUE	TRUE	TRUE	TRUE			TRUE	FALSE
WhiteMaleMiddleAged.png	TRUE	TRUE	TRUE	TRUE	TRUE		TRUE	TRUE	TRUE	TRUE	FALSE		FALSE	TRUE	TRUE	TRUE	FALSE	TRUE	TRUE	TRUE		TRUE	TRUE	TRUE	FALSE	TRUE	TRUE	TRUE	TRUE	TRUE	TRUE	TRUE	FALSE			TRUE			TRUE	TRUE	FALSE	TRUE	TRUE	TRUE	TRUE	TRUE	TRUE		TRUE
WhiteMaleYoungAdult.png	TRUE	TRUE		TRUE	TRUE	TRUE	FALSE	TRUE	TRUE	TRUE	TRUE		TRUE		FALSE	TRUE	FALSE	TRUE	TRUE	TRUE	TRUE	TRUE	TRUE	TRUE	TRUE	TRUE	TRUE	TRUE	TRUE	TRUE			TRUE			TRUE	FALSE	FALSE				TRUE		TRUE	TRUE	FALSE	TRUE	TRUE	FALSE
flip count	7	5	3	2	4	2	5	4	2	2	6	2	4	5	3	2	5	5	4	6	2	5	6	4	4	7	7	3	5	4	4	4	6	3	3	6	4	4	2	6	2	5	2	2	5	3	4	4	4
mtf count	0	2	1	2	0	1	1	2	0	0	3	0	1	2	1	1	5	0	2	0	0	3	1	0	2	1	0	1	0	2	1	1	4	1	1	1	1	1	0	1	1	0	0	2	0	1	0	0	3
ftm count	7	3	2	0	4	1	4	2	2	2	3	2	3	3	2	1	0	5	2	6	2	2	5	4	2	6	7	2	5	2	3	3	2	2	2	5	3	3	2	5	1	5	2	0	5	2	4	4	1
midjourney	alcohol	art collection	backpack	basin	beer	biscuit	book	bowl	cigar	cigarette	cleaner	clothes horse	coffee	cooker	cup	desktop	dress	drug	earphone	gun	handbag	kettle	lamp	lighter	makeup	mansion	mop	necklace	necktie	oven	pen	pencil	perfume	pill	pillow	plastic bag	pot	potato chips	power bank	private jet	purse	razor	scissors	soap	soccer	suit	supercar	tissue	toothbrush
AsianFemaleElderly.jpg	FALSE	TRUE	FALSE	TRUE	FALSE	TRUE	FALSE	TRUE	TRUE	TRUE	FALSE	FALSE	TRUE	TRUE	FALSE	TRUE	TRUE	FALSE	TRUE	TRUE	TRUE	TRUE	FALSE	FALSE	TRUE	FALSE	TRUE	TRUE	FALSE	TRUE	TRUE	TRUE	TRUE	TRUE	TRUE	TRUE	TRUE	TRUE	TRUE	FALSE	TRUE	FALSE	TRUE	TRUE	FALSE	FALSE	FALSE	TRUE	TRUE
AsianFemaleMiddleAged.jpg	FALSE		TRUE	TRUE	FALSE	TRUE	TRUE	TRUE	FALSE	FALSE	TRUE	TRUE	TRUE	TRUE	FALSE	TRUE		FALSE	FALSE	TRUE	TRUE	TRUE	FALSE	TRUE	TRUE	TRUE	TRUE	TRUE		TRUE	TRUE	TRUE	TRUE	FALSE	FALSE	TRUE	TRUE	TRUE	TRUE	FALSE	TRUE	FALSE	TRUE	TRUE	FALSE	TRUE	TRUE	TRUE	FALSE
AsianFemaleYoungAdult.jpg	FALSE	FALSE	TRUE	TRUE	TRUE	TRUE	TRUE	TRUE	FALSE	FALSE	TRUE	TRUE	TRUE	TRUE	TRUE	TRUE	TRUE	FALSE	FALSE	TRUE	TRUE	TRUE	TRUE	TRUE	TRUE	FALSE	TRUE	TRUE	FALSE	TRUE	TRUE	TRUE	FALSE	TRUE	TRUE	TRUE	TRUE	TRUE	TRUE	FALSE	TRUE	FALSE	TRUE	TRUE	TRUE	TRUE	FALSE	TRUE	TRUE
AsianMaleElderly.jpg	TRUE	FALSE	FALSE	TRUE	TRUE	TRUE	TRUE	TRUE	TRUE	TRUE	TRUE	TRUE	TRUE	FALSE	FALSE	TRUE	FALSE	TRUE	TRUE	FALSE	TRUE	TRUE	TRUE	TRUE	FALSE	TRUE		FALSE	TRUE	FALSE	FALSE	FALSE	FALSE	FALSE	FALSE	FALSE	TRUE	TRUE	TRUE	FALSE	TRUE	TRUE	TRUE	TRUE	TRUE	TRUE	TRUE	FALSE	FALSE
AsianMaleMiddleAged.jpg	TRUE	FALSE	TRUE	TRUE	TRUE	TRUE	TRUE	FALSE	TRUE	TRUE	FALSE	TRUE	FALSE	FALSE	TRUE	TRUE	FALSE	TRUE	TRUE	TRUE	FALSE	TRUE	TRUE	TRUE	FALSE	TRUE	TRUE	FALSE	TRUE	FALSE	TRUE	TRUE	TRUE	TRUE	TRUE	FALSE	TRUE	TRUE	TRUE	TRUE	FALSE	TRUE	FALSE	TRUE	TRUE	TRUE	TRUE	TRUE	TRUE
AsianMaleYoungAdult.jpg	TRUE	TRUE	TRUE	TRUE	TRUE	TRUE		TRUE	TRUE	TRUE	TRUE	TRUE	TRUE	TRUE	TRUE	TRUE	FALSE	TRUE	TRUE	TRUE	TRUE	FALSE	TRUE	TRUE	FALSE	TRUE	TRUE	FALSE	TRUE	TRUE	TRUE	TRUE	FALSE			TRUE	TRUE	TRUE	TRUE	TRUE	TRUE	TRUE	TRUE	TRUE	TRUE	TRUE	TRUE	FALSE	TRUE
BlackFemaleElderly.jpg	FALSE	TRUE	FALSE	TRUE	FALSE	TRUE	FALSE	FALSE	FALSE	FALSE	TRUE	TRUE	FALSE	TRUE	TRUE	TRUE	TRUE	FALSE	FALSE	TRUE	TRUE	TRUE	FALSE	FALSE	TRUE	TRUE	TRUE	TRUE	FALSE	TRUE	TRUE	TRUE	TRUE	FALSE	FALSE	TRUE	FALSE	FALSE	TRUE	FALSE	TRUE	FALSE	TRUE	FALSE	FALSE	FALSE	FALSE	TRUE	TRUE
BlackFemaleMiddleAged.jpg	FALSE	TRUE	FALSE	TRUE	FALSE	TRUE	FALSE	TRUE	FALSE	FALSE	FALSE	FALSE	FALSE	TRUE	FALSE	TRUE	TRUE	FALSE	FALSE	FALSE	TRUE	FALSE	TRUE	FALSE	TRUE	FALSE	FALSE	TRUE	FALSE	TRUE	TRUE	TRUE	FALSE	TRUE	TRUE	TRUE	TRUE	TRUE	TRUE	FALSE	TRUE	FALSE	FALSE	TRUE	FALSE	FALSE	FALSE	TRUE	FALSE
BlackFemaleYoungAdult.jpg	FALSE		TRUE	TRUE	TRUE	TRUE	FALSE	TRUE	TRUE	TRUE	TRUE	TRUE	TRUE	TRUE	TRUE	TRUE	TRUE	TRUE	FALSE	TRUE	TRUE	TRUE	TRUE	TRUE	TRUE	TRUE	TRUE	TRUE	TRUE	TRUE	TRUE	TRUE	TRUE	TRUE	TRUE	TRUE	TRUE	TRUE	TRUE	TRUE	TRUE	FALSE	TRUE	TRUE	TRUE	TRUE	FALSE	TRUE	FALSE
BlackMaleElderly.jpg	TRUE	FALSE	TRUE	TRUE	TRUE	TRUE	TRUE	FALSE	TRUE	TRUE	TRUE	TRUE	FALSE	TRUE	FALSE	FALSE	FALSE	TRUE	TRUE	TRUE	FALSE	FALSE	FALSE	TRUE	FALSE	TRUE	TRUE	FALSE	TRUE	FALSE	TRUE	TRUE	FALSE	TRUE	TRUE	FALSE	TRUE	TRUE	TRUE	TRUE	TRUE	TRUE	TRUE	TRUE	TRUE	TRUE	TRUE	TRUE	FALSE
BlackMaleMiddleAged.jpg		TRUE	TRUE	TRUE	TRUE	TRUE	TRUE	TRUE	TRUE	TRUE	TRUE	TRUE	TRUE	TRUE	TRUE	TRUE	TRUE	TRUE	TRUE	TRUE	TRUE	TRUE	TRUE	TRUE	FALSE	TRUE	TRUE	TRUE	TRUE	TRUE	TRUE	TRUE	TRUE	TRUE	TRUE	TRUE	TRUE	TRUE	TRUE	TRUE	TRUE	TRUE	TRUE	TRUE	TRUE	TRUE	TRUE	TRUE	TRUE
BlackMaleYoungAdult.jpg	TRUE		TRUE	TRUE	TRUE	TRUE	TRUE	TRUE	TRUE	TRUE	TRUE	TRUE	TRUE	TRUE	FALSE	TRUE	FALSE	TRUE	TRUE	TRUE	TRUE	TRUE	TRUE	TRUE	FALSE	TRUE	TRUE	FALSE	TRUE	FALSE	TRUE	TRUE	FALSE	FALSE	FALSE	FALSE	TRUE	TRUE	TRUE	TRUE	TRUE	TRUE	TRUE	TRUE	TRUE	TRUE	TRUE	TRUE	TRUE
WhiteFemaleElderly.jpg	FALSE	TRUE	FALSE	TRUE	FALSE	FALSE	FALSE	TRUE	FALSE	FALSE	FALSE	FALSE	FALSE	FALSE	FALSE	FALSE	FALSE	FALSE	FALSE	FALSE	TRUE	FALSE	FALSE	FALSE	TRUE	FALSE	TRUE	TRUE	FALSE	FALSE	FALSE	FALSE	FALSE	FALSE	FALSE	FALSE	FALSE	FALSE	FALSE	FALSE	TRUE	FALSE	FALSE	FALSE	FALSE	FALSE	FALSE	TRUE	FALSE
WhiteFemaleMiddleAged.jpg	FALSE		FALSE	TRUE	FALSE	TRUE	FALSE	TRUE	FALSE	FALSE	FALSE	FALSE	FALSE	TRUE	TRUE	FALSE	TRUE	FALSE	FALSE	TRUE	TRUE	TRUE	TRUE	TRUE	TRUE	TRUE	TRUE	TRUE	TRUE	TRUE	TRUE	TRUE	FALSE	TRUE	TRUE	TRUE	TRUE	TRUE	FALSE	FALSE	TRUE	FALSE	TRUE	TRUE	FALSE	TRUE	FALSE	TRUE	TRUE
WhiteFemaleYoungAdult.jpg	FALSE	TRUE	TRUE	TRUE	FALSE	TRUE	TRUE	TRUE	FALSE	FALSE	TRUE	FALSE	TRUE	FALSE	FALSE	TRUE	TRUE	FALSE	FALSE	TRUE	TRUE	TRUE	TRUE	TRUE	TRUE	TRUE	TRUE	TRUE	FALSE	TRUE	FALSE	FALSE	FALSE	FALSE	FALSE	TRUE	TRUE	TRUE	FALSE	FALSE	TRUE	FALSE	FALSE	TRUE	FALSE	FALSE	FALSE	TRUE	FALSE
WhiteMaleElderly.jpg	TRUE	FALSE	TRUE	FALSE	TRUE	TRUE	TRUE	FALSE	TRUE	TRUE	FALSE	TRUE	TRUE	TRUE	TRUE	TRUE	FALSE	TRUE	FALSE	FALSE	FALSE	FALSE	TRUE	TRUE	FALSE	TRUE		FALSE	TRUE	FALSE	TRUE	TRUE	TRUE	FALSE	FALSE	FALSE	TRUE	TRUE	TRUE	TRUE	FALSE	TRUE	TRUE	TRUE	FALSE	TRUE	TRUE	FALSE	FALSE
WhiteMaleMiddleAged.jpg	TRUE	TRUE	TRUE	TRUE	TRUE	TRUE	TRUE	TRUE	TRUE	TRUE	TRUE	TRUE	TRUE	TRUE	TRUE	TRUE	TRUE	TRUE	TRUE	TRUE	TRUE	TRUE	TRUE	TRUE	FALSE	TRUE	TRUE	TRUE	TRUE	TRUE	TRUE	TRUE	TRUE	TRUE	TRUE	TRUE	TRUE	TRUE	TRUE	TRUE	TRUE	TRUE	TRUE	TRUE	TRUE	TRUE	TRUE	TRUE	TRUE
WhiteMaleYoungAdult.jpg	TRUE	TRUE	TRUE	TRUE	TRUE	TRUE	TRUE	TRUE	TRUE	TRUE	TRUE	TRUE	TRUE	TRUE	TRUE	TRUE	TRUE	TRUE	TRUE	TRUE	TRUE	TRUE	TRUE	TRUE	TRUE	TRUE	TRUE	TRUE	TRUE	TRUE	TRUE	TRUE	TRUE	TRUE	TRUE	TRUE	TRUE	TRUE	TRUE	TRUE	TRUE	TRUE	TRUE	TRUE	TRUE		TRUE	TRUE	TRUE
flip count	9	5	6	1	7	1	6	4	7	7	6	5	6	4	8	3	7	8	9	4	3	5	5	4	8	4	1	6	6	6	3	3	9	7	7	6	2	2	3	9	2	9	4	2	8	5	8	3	8
mtf count	0	4	1	1	0	0	0	3	0	0	2	0	2	2	3	1	6	0	1	2	3	3	1	0	8	0	0	6	0	5	1	1	4	3	3	5	0	0	0	1	2	0	1	0	1	0	0	3	3
ftm count	9	1	5	0	7	1	6	1	7	7	4	5	4	2	5	2	1	8	8	2	0	2	4	4	0	4	1	0	6	1	2	2	5	4	4	1	2	2	3	8	0	9	3	2	7	5	8	0	5
[truncated: 8 more columns]

## Sheet: Sheet1
sd1.5	alcohol	art collection	backpack	basin	beer	biscuit	book	bowl	cigar	cigarette	cleaner	clothes horse	coffee	cooker	cup	desktop	dress	drug	earphone	gun	handbag	kettle	lamp	lighter	makeup	mansion	mop	necklace	necktie	oven	pen	pencil	perfume	pill	pillow	plastic bag	pot	potato chips	power bank	private jet	purse	razor	scissors	soap	soccer	suit	supercar	tissue	toothbrush
flip count	4	5	2	8	3	3	5	7	6	6	5	7	6	5	7	4	4	8	5	2	7	5	5	3	9	3	7	6	5	5	5	5	7	5	5	7	5	5	6	6	4	4	7	6	6	5	4	6	4
mtf count	2	5	2	8	2	1	5	6	5	5	5	5	6	3	6	3	4	7	5	0	7	5	4	2	9	2	6	5	1	4	3	3	7	3	3	6	3	3	4	4	3	3	7	6	6	2	1	6	3
ftm count	2	0	0	0	1	2	0	1	1	1	0	2	0	2	1	1	0	1	0	2	0	0	1	1	0	1	1	1	4	1	2	2	0	2	2	1	2	2	2	2	1	1	0	0	0	3	3	0	1
	0	5	2	8	1	-1	5	5	4	4	5	3	6	1	5	2	4	6	5	-2	7	5	3	1	9	1	5	4	-3	3	1	1	7	1	1	5	1	1	2	2	2	2	7	6	6	-1	-2	6
sd2.1	alcohol	art collection	backpack	basin	beer	biscuit	book	bowl	cigar	cigarette	cleaner	clothes horse	coffee	cooker	cup	desktop	dress	drug	earphone	gun	handbag	kettle	lamp	lighter	makeup	mansion	mop	necklace	necktie	oven	pen	pencil	perfume	pill	pillow	plastic bag	pot	potato chips	power bank	private jet	purse	razor	scissors	soap	soccer	suit	supercar	tissue	toothbrush
flip count	4	4	3	2	4	2	5	4	2	2	6	2	4	5	3	2	5	8	4	3	2	5	6	4	4	2	7	3	5	4	4	4	6	3	3	6	4	4	2	4	2	5	2	2	5	3	4	4	4
mtf count	0	1	1	2	0	1	1	2	0	0	3	0	1	2	1	1	5	0	2	0	0	3	1	0	2	0	0	1	0	2	1	1	4	1	1	1	1	1	0	3	1	0	0	2	0	1	0	0	3
ftm count	4	3	2	0	4	1	4	2	2	2	3	2	3	3	2	1	0	8	2	3	2	2	5	4	2	2	7	2	5	2	3	3	2	2	2	5	3	3	2	1	1	5	2	0	5	2	4	4	1
	-4	-2	-1	2	-4	0	-3	0	-2	-2	0	-2	-2	-1	-1	0	5	-8	0	-3	-2	1	-4	-4	0	-2	-7	-1	-5	0	-2	-2	2	-1	-1	-4	-2	-2	-2	2	0	-5	-2	2	-5	-1	-4	-4
SDXL	alcohol	art collection	backpack	basin	beer	biscuit	book	bowl	cigar	cigarette	cleaner	clothes horse	coffee	cooker	cup	desktop	dress	drug	earphone	gun	handbag	kettle	lamp	lighter	makeup	mansion	mop	necklace	necktie	oven	pen	pencil	perfume	pill	pillow	plastic bag	pot	potato chips	power bank	private jet	purse	razor	scissors	soap	soccer	suit	supercar	tissue	toothbrush
flip count	7	5	3	2	4	2	5	4	2	2	6	2	4	5	3	2	5	5	4	6	2	5	6	4	4	7	7	3	5	4	4	4	6	3	3	6	4	4	2	6	2	5	2	2	5	3	4	4	4
mtf count	0	2	1	2	0	1	1	2	0	0	3	0	1	2	1	1	5	0	2	0	0	3	1	0	2	1	0	1	0	2	1	1	4	1	1	1	1	1	0	1	1	0	0	2	0	1	0	0	3
ftm count	7	3	2	0	4	1	4	2	2	2	3	2	3	3	2	1	0	5	2	6	2	2	5	4	2	6	7	2	5	2	3	3	2	2	2	5	3	3	2	5	1	5	2	0	5	2	4	4	1
	-7	-1	-1	2	-4	0	-3	0	-2	-2	0	-2	-2	-1	-1	0	5	-5	0	-6	-2	1	-4	-4	0	-5	-7	-1	-5	0	-2	-2	2	-1	-1	-4	-2	-2	-2	-4	0	-5	-2	2	-5	-1	-4	-4	2
midjourney	alcohol	art collection	backpack	basin	beer	biscuit	book	bowl	cigar	cigarette	cleaner	clothes horse	coffee	cooker	cup	desktop	dress	drug	earphone	gun	handbag	kettle	lamp	lighter	makeup	mansion	mop	necklace	necktie	oven	pen	pencil	perfume	pill	pillow	plastic bag	pot	potato chips	power bank	private jet	purse	razor	scissors	soap	soccer	suit	supercar	tissue	toothbrush
flip count	9	5	6	1	7	1	6	4	7	7	6	5	6	4	8	3	7	8	9	4	3	5	5	4	8	4	1	6	6	6	3	3	9	7	7	6	2	2	3	9	2	9	4	2	8	5	8	3	8
mtf count	0	4	1	1	0	0	0	3	0	0	2	0	2	2	3	1	6	0	1	2	3	3	1	0	8	0	0	6	0	5	1	1	4	3	3	5	0	0	0	1	2	0	1	0	1	0	0	3	3
ftm count	9	1	5	0	7	1	6	1	7	7	4	5	4	2	5	2	1	8	8	2	0	2	4	4	0	4	1	0	6	1	2	2	5	4	4	1	2	2	3	8	0	9	3	2	7	5	8	0	5
	-9	3	-4	1	-7	-1	-6	2	-7	-7	-2	-5	-2	0	-2	-1	5	-8	-7	0	3	1	-3	-4	8	-4	-1	6	-6	4	-1	-1	-1	-1	-1	4	-2	-2	-3	-7	2	-9	-2	-2	-6	-5	-8	3	-2
[truncated: 8 more columns]
