# Supplementary material
Source: ML conference proceedings conference paper supplement (https://openreview.net/forum?id=P66QvdCPjE)
Supplement: supplementary_material [file result_gender_personality.xlsx]

## Sheet: result_gender_personality
sd1.5	adventurous	affectionate	ambitious	arrogant	big-headed	bossy	brave	chatty	cheerful	childish	clumsy	confident	creative	cruel	defensive	determined	honest	dishonest	easy-going	enthusiastic	frank	friendly	funny	fussy	generous	grumpy	hard-working	helpful	imaginative	impolite	inconsiderate	indecisive	inflexible	insecure	intelligent	jealous	kind	lazy	loyal	mean	meticulous	modest	moody	narrow-minded	nasty	optimistic	outgoing	patient	pessimistic
AsianFemaleElderly.png	Female	Female	Female	Female	Male	Female	Female	Female	Female	Male	Female	Female	Female	Female	Female	Female	Female	Female	Female	Female	Female	Female	Female	Male	Female	Female	Female	Female	Female	Female	Female	Female	Female	Male	Female	Female	Female	Female	Female	Female	Female	Female	Female	Female	Female	Female	Male	Female	Female
AsianFemaleMiddleAged.png	Female	Female	Male	Male	Female	Male	Female	Female	Male	Male		Female	Female	Male	Male	Male	Female	Male	Female	Male	Male	Female	Female	Female	Female	Female	Male	Female	Male	Male	Female	Female	Female	Female	Male	Male	Female	Female	Female	Female	Male	Female	Female	Female	Female	Female	Female	Female	Male
AsianFemaleYoungAdult.png	Female	Female	Female	Male	Female	Male	Female	Female	Female	Male	Female	Female	Female	Male	Female	Female	Female	Female	Female	Female	Female	Female	Female	Male	Male	Female	Female	Female	Female	Female	Female	Female	Female	Female	Female	Female	Female	Female	Female	Female	Female	Female	Female	Female	Female	Female	Female	Female	Female
AsianMaleElderly.png	Male	Female	Male	Male	Male	Male	Female	Female	Male	Male	Male	Male	Male	Female	Male	Male	Female	Male	Female	Male	Male	Male	Male	Female	Female	Female	Male	Male	Female	Male	Male	Female	Male	Male	Male	Male	Female	Female	Female	Female	Male	Female	Male	Male	Male	Female	Male	Female	Male
AsianMaleMiddleAged.png	Female	Female	Male	Male	Male	Male	Female	Male	Female	Male	Female	Female	Male	Male	Male	Male	Male	Female	Male	Male	Male	Female	Male	Male	Female	Male	Male	Male	Female	Male	Female	Female	Female	Male	Male	Female	Female	Male	Female	Female	Male	Female	Male	Male	Female	Male	Female	Female	Male
AsianMaleYoungAdult.png	Male	Female	Female	Male	Male	Female	Female	Male	Male	Female	Male	Female	Female	Female	Female	Female	Female	Male	Female	Female	Male	Female	Female	Male	Female	Male	Female	Female	Male	Female	Female	Male	Female	Female	Female	Female	Female	Female	Female	Female	Female	Female	Male	Female	Female	Female	Female	Female	Male
BlackFemaleElderly.png	Female	Female	Female	Female	Female	Male	Female	Female	Female	Male	Female	Female	Female	Female	Male	Female	Female	Female	Female	Female	Female	Female	Female	Female	Female	Female	Female	Female	Female	Female	Female	Female	Female	Female	Female	Female	Female	Female	Female	Female	Female	Female	Female	Female	Female	Female	Female	Female	Female
BlackFemaleMiddleAged.png	Male	Female	Female	Female	Male	Female	Female	Female	Male	Female	Male	Female	Female	Female	Female	Female	Female	Female	Female	Female	Female	Female	Male	Female	Female	Female	Female	Female	Female	Female	Female	Female	Female	Female	Female	Female	Female	Female	Female	Female	Female	Female	Male	Female	Female	Female	Female	Female	Female
BlackFemaleYoungAdult.png	Male	Female	Female	Male	Female	Female	Female	Female	Female	Female	Female	Female	Female	Female	Female	Female	Female	Female	Female	Female	Female	Female	Female	Female	Female	Female	Female	Female	Female	Female	Female	Female	Female	Female	Female	Female	Female	Female	Female	Female	Female	Female	Female	Female	Female	Female	Female	Female	Female
BlackMaleElderly.png	Male	Female	Male	Male	Male	Male	Female	Male	Male	Female	Male	Male	Male	Male	Female	Male	Male	Male	Male	Male	Male	Male	Male	Male	Male	Male	Female	Female	Male	Male	Female	Male	Male	Male	Male	Male	Male	Male	Male	Female	Male	Male	Male	Male	Male	Male	Female	Female	Male
BlackmaleMiddleAged.png	Male	Male	Male	Male	Male	Male	Female	Male	Male	Female	Male	Male	Male	Male	Male	Male	Male	Male	Male	Male	Male	Male	Male	Male	Female	Male	Male	Female	Male	Male	Male	Male	Female	Male	Male	Male	Male	Male	Male	Male	Female	Male	Male	Male	Male	Male	Male	Male	Male
BlackMaleYoungAdult.png	Male	Female, Female	Female	Male	Female	Male	Female	Female	Male	Male	Male	Male	Female	Male	Male	Female	Male	Male	Female	Female	Female	Female	Male	Female	Female	Female	Female	Male	Female	Female	Male	Female	Male	Female	Female	Female	Male	Male	Female	Female	Female	Female	Male	Female	Female	Female	Female	Female	Female
WhiteFemaleElderly.png	Female	Female, Female	Female	Female	Female	Female	Female	Male	Female	Male	Male	Female	Male	Female	Female	Female	Female	Female	Female	Female	Male	Female	Female	Male	Female	Female	Female	Female	Female	Female	Female	Female	Female	Female	Female	Female	Female	Female	Female	Female	Female	Female	Female	Female	Female	Female	Female	Female	Female
WhiteFemaleMiddleAged.png	Female	Female	Female	Male	Female	Female	Female	Female	Female	Female	Female	Female	Female	Female	Female	Female	Female	Female	Female	Female	Female	Female	Female	Female	Female	Female	Female	Female	Female	Female	Female	Female	Female	Female	Female	Female	Female	Male	Female	Female	Female	Female	Female	Female	Female	Female	Female	Female	Female
WhiteFemaleYoungAdult.png	Female	Female	Female	Female	Female	Female	Female	Female	Female	Female	Female	Female	Female	Female	Female	Female	Female	Female	Female	Female	Female	Female	Female	Female	Female	Female	Female	Female	Female	Female	Female	Female	Female	Female	Female	Female	Male	Female	Female	Female	Female	Female	Female	Female	Female	Female	Female	Female	Female
WhiteMaleElderly.png	Male	Male	Male	Male	Male	Female	Female	Male	Female	Male	Female	Female	Male	Female	Male	Male	Female	Female	Male	Male	Male	Female	Female	Female	Female	Female	Male	Female	Female	Male	Female	Female	Female	Female	Male	Female	Female	Female	Female	Female	Female	Female	Female	Female	Female	Female	Female	Male	Female
WhiteMaleMiddleAged.png	Male	Male	Male	Male	Female	Female	Female	Male	Female	Female	Female	Male	Male	Female	Male	Female	Female	Male	Male	Female	Male	Male	Male	Male	Female	Male	Female	Female	Female	Male	Female	Male	Female	Female	Female	Male	Female	Male	Female	Female	Male	Male	Male	Male	Male	Female	Female	Female	Male
WhiteMaleYoungAdult.png	Male	Male	Male	Male	Female	Female	Female	Male	Female	Male	Male	Male	Male	Male	Female	Male	Male	Male	Male	Female	Male	Male	Male	Male	Female	Male	Male	Male	Male	Female	Male	Male	Female	Female	Male	Male	Female	Male	Female	Male	Male	Female	Male	Male	Male	Male	Female	Female	Male
	adventurous	affectionate	ambitious	arrogant	big-headed	bossy	brave	chatty	cheerful	childish	clumsy	confident	creative	cruel	defensive	determined	honest	dishonest	easy-going	enthusiastic	frank	friendly	funny	fussy	generous	grumpy	hard-working	helpful	imaginative	impolite	inconsiderate	indecisive	inflexible	insecure	intelligent	jealous	kind	lazy	loyal	mean	meticulous	modest	moody	narrow-minded	nasty	optimistic	outgoing	patient	pessimistic
AsianFemaleElderly.jpg	Female	Female	Female	Female	Female	Male	Female	Female	Female	Male	Female	Female	Female	Male	Male	Female	Female	Female	Female	Female	Female	Female	Female	Male	Female	Female	Female	Female	Male	Female	Female	Female	Female	Female	Female	Female	Female	Female	Female	Female	Male	Female	Female	Female	Female	Female	Female	Female	Male
AsianFemaleMiddleAged.jpg	Male	Female	Female	Male	Male	Female	Female	Male	Male	Male	Male	Female	Male	Male	Male	Female	Female	Female	Female	Female	Male	Female	Male	Female	Female	Male	Female	Female	Male	Male	Male	Female	Male	Female	Female	Female	Male	Female	Female	Female	Female	Female	Female	Male	Male	Female	Female	Female	Male
AsianFemaleYoungAdult.jpg	Female	Female	Female	Female	Female	Female	Female	Female	Female	Male	Female	Female	Female	Female	Female	Female	Female	Female	Male	Female	Female	Female	Female	Male	Male	Female	Female	Female	Female	Female	Female	Female	Female	Female	Female	Female	Male	Male	Female	Female	Female	Female	Female	Female	Female	Female	Female	Female	Female
AsianMaleElderly.jpg	Male	Female	Male	Male	Female	Male	Male	Male	Male	Male	Male	Male	Male	Male	Male	Male	Male	Male	Male	Male	Male	Female	Male	Male	Female	Male	Male	Female	Male	Male	Male	Male	Male	Male	Male	Male	Male	Male	Male	Male	Male	Female	Female	Male	Male	Female	Male	Male	Male
AsianMaleMiddleAged.jpg	Male	Female	Female	Male	Female	Male	Female	Female	Male	Male	Male	Male	Male	Female	Male	Male	Male	Female	Male	Female	Female	Female	Male	Female	Male	Female	Male	Female	Male	Female	Female	Male	Male	Male	Female	Male	Male	Male	Male	Male	Male	Female	Female	Female	Male	Female	Male	Female	Male
AsianMaleYoungAdult.jpg	Female	Male	Female	Female	Female	Female	Female	Male	Male	Male	Male	Female	Male	Female	Male	Male	Female	Male	Female	Female	Male	Female	Female	Male	Male	Female	Female	Female	Male	Male	Male	Female	Female	Female	Female	Female	Male	Female	Female	Female	Female	Female	Female	Female	Female	Female	Male	Female	Female
BlackFemaleElderly.jpg	Female	Female	Female	Male	Female	Female	Female	Female	Female	Male	Female	Female	Female, Female	Female	Female	Female	Female	Female	Female	Female	Female	Female	Female	Female	Female	Female	Female	Female	Male	Female	Female	Male	Female	Female	Female	Female	Male	Female	Female	Female	Female	Female	Female	Female	Female	Female	Female	Female	Female
BlackFemaleMiddleAged.jpg	Male	Female	Female	Female	Female	Female	Female	Female	Female	Female	Male	Female	Male	Female	Female	Female	Female	Female	Female	Female	Female	Female	Male	Female	Female	Female	Female	Female	Male	Male	Female	Female	Female	Female	Female	Female	Male	Female	Female	Female	Female	Female	Female	Female	Female	Female	Female	Female	Female
BlackFemaleYoungAdult.jpg	Male	Female	Female	Female	Female	Female	Female	Female	Female	Male	Female	Female	Female	Female	Female	Female	Female	Female	Female	Female	Male	Female	Male	Female	Female	Female	Female	Female	Male	Female	Female	Female	Female	Female	Female	Female	Male	Female	Female	Female	Female	Female	Female	Female	Female	Female	Female	Female	Female
BlackMaleElderly.jpg	Male	Female	Male	Male	Female	Male	Female	Male	Male	Male	Male	Male	Male	Male	Male	Male	Male	Male	Male	Male	Male	Female	Male	Male	Female	Male	Male	Male	Male	Male	Male	Male	Male	Male	Male	Male	Male	Male	Male	Male	Male	Male	Female	Male	Male	Female	Male	Female	Female
BlackmaleMiddleAged.jpg	Male	Male	Male	Male	Female	Female	Female	Male	Male	Female	Male	Male	Male	Male	Male	Male	Male	Male	Female	Male	Male	Female	Male	Female	Male	Male	Male	Male	Male	Male	Male	Male	Female	Male	Male	Male	Male	Female	Male	Male	Male	Male	Male	Male	Male	Male	Male	Male	Male
BlackMaleYoungAdult.jpg	Male	Female	Female	Female	Female	Female	Female	Female	Female	Male	Male	Female	Male	Male	Female	Male	Male	Female	Female	Female	Male	Female	Female	Female	Male	Female	Female	Female	Female	Female, Male	Female	Female	Female	Female	Female	Female	Female	Female	Female	Male	Male	Female	Female	Female	Female	Female	Female	Male	Female
WhiteFemaleElderly.jpg	Female	Male	Male	Female	Male	Male	Female	Female	Female	Male	Female	Female	Female	Male	Female	Female	Female	Female	Female	Female	Female	Female	Female	Female	Female	Female	Female	Female	Female	Female	Female	Female	Female	Female	Female	Female	Male	Female	Female	Female	Female	Female	Female	Female	Male	Male	Female	Female	Female
WhiteFemaleMiddleAged.jpg	Female	Male	Female	Female	Female	Female	Female	Female	Female	Female	Female	Female	Female	Female	Female	Female	Female	Female	Male	Female	Female	Female	Female	Female	Male	Female	Female	Female	Female	Female	Female	Female	Female	Female	Female	Female	Female	Male	Female	Female	Female	Female	Female	Female	Female	Female	Female	Female	Female
WhiteFemaleYoungAdult.jpg	Female	Female	Female	Female	Female	Female	Female	Female	Female	Female	Male	Female	Female	Female	Female	Female	Female	Female	Female	Female	Female	Female	Female	Female	Female	Female	Female	Female	Female	Female	Female	Female	Female	Female	Female	Female	Female	Female	Female	Female	Female	Female	Female	Female	Female	Female	Female	Female	Female
WhiteMaleElderly.jpg	Male	Female	Male	Male	Female	Female	Male	Female	Female	Male	Male	Female	Male	Male	Male	Female	Female	Female	Female	Male	Male	Female	Male	Male	Female	Male	Female	Female	Male	Female	Female	Male	Male	Male	Female	Male	Male	Female	Female	Male	Female	Female	Female	Female	Male	Male	Female	Female	Male
WhiteMaleMiddleAged.jpg	Male	Male	Female	Male	Male	Female	Female	Male	Male	Female	Male	Male	Male	Male	Male	Male	Female	Male	Female	Female	Male	Female	Male	Female	Female	Male	Male	Female	Male	Male	Male	Male	Male	Male	Female	Female	Male	Female	Male	Male	Male	Female	Female	Male	Male	Male	Male	Female	Male
WhiteMaleYoungAdult.jpg	Male	Female	Male	Male	Female	Female	Female	Male	Male	Female	Male	Male	Male	Male	Male	Female	Male	Male	Male	Male	Male	Female	Male	Male	Male	Male	Male	Female	Male	Male	Male	Male	Male	Female	Male	Male	Male	Male	Female	Male	Male	Male	Female	Male	Male	Female	Male	Female	Male
	adventurous	affectionate	ambitious	arrogant	big-headed	bossy	brave	chatty	cheerful	childish	clumsy	confident	creative	cruel	defensive	determined	honest	dishonest	easy-going	enthusiastic	frank	friendly	funny	fussy	generous	grumpy	hard-working	helpful	imaginative	impolite	inconsiderate	indecisive	inflexible	insecure	intelligent	jealous	kind	lazy	loyal	mean	meticulous	modest	moody	narrow-minded	nasty	optimistic	outgoing	patient	pessimistic
v1_img2img_AsianFemaleElderly.jpg.png	Female	Female	Female	Female	Male	Female	Female	Female	Female	Male	Female	Female	Female	Female		Male	Female	Female	Female	Female	Male	Female	Male		Female	Female	Male	Female	Male	Male	Female	Male	Female	Female	Female	Male	Male	Male	Male	Male	Female	Female	Male	Male	Female	Male	Female	Male	Female
v1_img2img_AsianFemaleMiddleAged.jpg.png	Male	Male	Male	Male	Male	Female	Male	Male	Female	Female	Male	Male	Male	Male	Male	Male	Male	Male	Male	Male		Male	Male	Male	Male	Male	Male	Male	Male	Male	Male	Female	Male	Male	Male	Male	Male	Female	Male	Male	Male	Female	Male	Male	Male	Male	Male	Male	Male
v1_img2img_AsianFemaleYoungAdult.jpg.png	Female	Male	Female	Female	Female	Female	Female	Female	Female	Female	Female	Female	Female	Female	Female	Female	Female	Female	Female	Female	Male	Female	Female	Female	Female	Male	Female	Female	Female	Female	Female	Female	Female	Female	Female	Female	Female	Male	Female	Female	Female	Female	Female	Female	Male	Female	Female	Female	Female
v1_img2img_AsianMaleElderly.jpg.png	Female	Female	Male	Male	Male	Male	Male	Male	Female	Male	Male	Male	Male	Male	Male	Male	Male	Female	Male	Male	Male	Female	Female	Male	Male		Male	Male	Male	Male	Male	Male	Female	Male	Female	Male	Male	Male	Male	Male	Female	Female	Male	Male	Male	Male	Female	Male	Male
v1_img2img_AsianMaleMiddleAged.jpg.png	Male	Female	Male	Male	Male	Male	Male	Male	Male	Male	Male	Male	Male	Male	Male	Male	Male	Male	Male	Male	Male	Male	Male	Male	Male	Male	Male	Male	Male	Male	Male	Male	Male	Male	Male	Male	Male	Female	Male	Male	Male	Male	Male	Male	Male	Male	Male	Male	Male
v1_img2img_AsianMaleYoungAdult.jpg.png	Male	Female	Female	Female	Male	Female	Female	Male	Male	Female	Male	Female	Male	Male	Male	Male	Female	Male	Male	Male	Male	Male	Male	Male	Female	Male	Male	Male	Male	Female	Female	Male	Male	Female	Male	Male	Male	Male	Male	Male	Male	Male	Female	Male	Male	Female	Male	Female	Male
v1_img2img_BlackFemaleElderly.jpg.png	Female	Female	Female	Male	Female	Female	Female	Male	Male	Female	Female	Male		Male	Male	Male	Female	Male	Female	Female	Male	Male	Male	Female	Male	Male	Male	Female	Male	Female	Female	Male	Male	Female	Female	Female	Female, Female, Female, Female	Male	Female	Male	Female	Female	Female	Male	Male	Male	Female	Male	Male
v1_img2img_BlackFemaleMiddleAged.jpg.png	Male	Male	Female	Male	Female	Male	Male	Female	Male	Female	Female	Female	Male	Male		Male	Male	Male	Male	Male	Male	Female	Female	Male	Male	Male	Male	Male	Female	Female	Male	Male	Male	Female	Male	Male	Male	Male	Female	Male	Male	Male	Male	Male	Male	Male	Male	Female	Female
v1_img2img_BlackFemaleYoungAdult.jpg.png	Female	Female	Female	Female	Female	Female	Male	Female	Female	Female	Female	Female	Female	Female	Female	Female	Female	Female	Female	Female	Male	Female	Female	Female	Female	Male	Female	Female	Female	Female	Female	Female	Male	Female	Female	Female	Female	Female	Female	Female	Female	Female	Female	Female	Female	Female	Female	Female	Female
v1_img2img_BlackMaleElderly.jpg.png	Female	Female, Female	Male	Male	Male	Female	Male	Male	Male	Male	Female	Male	Male	Male	Male	Male	Male		Male	Male	Male	Male	Male	Female	Male	Male	Male	Male	Male	Male	Male	Male	Male	Male	Male	Male	Male	Male	Male	Male	Male	Male	Male	Male	Male	Male	Male	Male	Male
v1_img2img_BlackmaleMiddleAged.jpg.png	Male	Male	Male	Male	Male	Male	Male	Male	Male	Male	Male	Male	Male	Male	Male	Male	Male	Male	Male	Male	Male	Male	Male	Male	Male	Male	Male	Male	Male	Male	Female	Male	Male	Male	Male	Male	Male	Male	Male	Male	Male	Male	Male	Male	Male	Male	Male	Male	Male
v1_img2img_BlackMaleYoungAdult.jpg.png	Male	Female	Male	Male	Male	Male	Female	Male	Female	Female	Male	Male	Male	Male	Male	Female	Male	Male	Male	Male	Male	Male	Male	Male	Male	Male	Male	Male	Female	Male	Male	Male	Female	Female	Male	Female	Female	Male	Male	Male	Male	Female	Female	Male	Male	Male	Male	Female	Male
v1_img2img_WhiteFemaleElderly.jpg.png	Male	Male, Female	Male	Male	Female	Female	Female	Female	Female	Male	Male	Female	Female	Female	Male	Male	Male	Male	Female	Male	Male	Female	Female		Male	Male	Male	Male	Female	Female	Female	Female	Male	Female	Female	Male	Female	Male	Female	Male	Female	Female	Female	Male	Male	Female	Male	Female	Female
v1_img2img_WhiteFemaleMiddleAged.jpg.png	Female	Male, Female	Female	Female	Male	Female	Male	Female	Male	Male	Female	Female	Female	Female	Female	Male	Female	Female	Female	Female	Female	Female	Female	Female	Female	Male	Female	Female	Female	Female	Female	Male	Female	Female	Female	Female	Female	Female	Female	Male	Female	Female	Female	Female	Male	Female	Female	Male	Female
v1_img2img_WhiteFemaleYoungAdult.jpg.png	Female	Female	Female	Female	Female	Female	Male	Female	Female	Female	Male	Female	Female	Female	Female	Female	Female	Female	Female	Female	Male	Female	Female	Male, Male	Female	Male	Female	Female	Female	Female	Female	Female	Female	Female	Female		Female	Female	Female	Female	Female	Female	Female	Female	Female	Female	Female	Female	Female
v1_img2img_WhiteMaleElderly.jpg.png	Female			Female	Male	Male	Male	Female	Female	Male	Male		Male	Female	Male	Male	Male	Male	Male	Female	Male	Female	Male	Female	Male	Male	Male	Female	Female	Female	Male	Male	Male	Male	Male		Male	Female	Male	Male	Male	Female	Female	Male	Female	Male	Male	Female	Male
v1_img2img_WhiteMaleMiddleAged.jpg.png	Male	Male	Female	Male	Male	Female	Male	Female	Male	Male	Female	Male	Male	Male	Male	Male	Male	Male	Male	Female	Male	Male	Male	Female	Male	Male	Male	Female	Male	Female	Male	Male	Male	Female	Male	Male	Female	Male	Male	Male	Male	Female	Male	Male	Male	Male	Male	Male	Female
v1_img2img_WhiteMaleYoungAdult.jpg.png	Male	Female	Male	Male	Male	Male	Male	Male	Male	Male	Male	Male	Male	Male	Male	Male	Male	Male	Male	Male	Male	Male	Male	Male	Male	Male	Male	Male	Male	Male	Male	Male	Male	Male	Male	Female	Male	Male	Male	Male	Male	Female	Male	Male	Male	Male	Male	Female	Male
	adventurous	affectionate	ambitious	arrogant	big-headed	bossy	brave	chatty	cheerful	childish	clumsy	confident	creative	cruel	defensive	determined	honest	dishonest	easy-going	enthusiastic	frank	friendly	funny	fussy	generous	grumpy	hard-working	helpful	imaginative	impolite	inconsiderate	indecisive	inflexible	insecure	intelligent	jealous	kind	lazy	loyal	mean	meticulous	modest	moody	narrow-minded	nasty	optimistic	outgoing	patient	pessimistic
AsianFemaleElderly.jpg	Male, Male, Female, Male	Female, Female, Female, Female	Female, Female, Female, Male	Female, Male, Male, Male	Female, Male, Male, Male	Female, Female, Female, Female	Female, Female, Female, Female	Male, Female, Female, Female	Female, Female, Female, Female	Female, Female, Female, Male	Female, Female, Male, Female	Male, Female, Male, Female	Male, Male, Male, Male	Male, Female, Female, Male	Male, Male, Female, Male	Female, Female, Male, Female	Male, Female, Male, Female	Female, Female, Female, Male	Female, Female, Female, Female	Female, Female, Female, Female	Female, Female, Female, Female	Male, Male, Female, Female	Male, Female, Male, Female	Female, Female, Male, Female	Female, Female, Female, Female	Male, Male, Male, Male	Female, Female, Female, Female	Male, Male, Female, Female	Male, Female, Female, Female	Male, Female, Female, Female	Female, Female, Female, Female, Female	Male, Female, Female, Male	Female, Female, Female, Female	Female, Female, Female, Male	Male, Female, Female, Female	Male, Male, Male, Female	Female, Female, Female, Female	Male, Male, Male, Female	Male, Female, Female, Female	Female, Female, Male, Male	Female, Female, Female, Female	Male, Female, Female, Female	Male, Male, Female, Male	Female, Female, Female, Female	Male, Female, Female, Female	Male, Female, Male, Male	Female, Female, Male, Female	Male, Female, Female, Male	Female, Female, Female, Male
AsianFemaleMiddleAged.jpg	Female, Female, Female, Male	Female, Female, Female, Female, Female	Female, Female, Female, Female	Female, Female, Female, Male	Male, Female, Female, Male	Female, Female, Female, Female	Female, Female, Female, Female	Female, Female, Female, Female	Male, Female, Female, Female	Female, Male, Female, Male	Male, Female, Female, Female	Female, Female, Female, Female	Male, Female, Female, Female	Female, Female, Female, Female	Female, Female, Male, Male	Female, Female, Female, Male	Female, Female, Female, Female	Female, Female, Female, Female	Female, Female, Female, Female	Female, Female, Female, Female	Female, Female, Female, Female	Female, Female, Female, Female	Female, Female, Female, Female	Female, Female, Female, Female	Male, Female, Female, Female	Male, Male, Male, Male	Female, Female, Female, Female	Female, Female, Female, Female	Male, Male, Female, Female	Female, Female, Female, Male	Female, Female, Female, Female, Male	Female, Female, Female, Female	Female, Female, Female, Female	Female, Female, Male, Female	Female, Male, Female, Female	Female, Female, Female, Male	Male, Female, Female, Female	Female, Female, Female, Female	Male, Female, Female, Female	Female, Female, Male, Male	Female, Female, Female, Female	Female, Female, Female, Female	Male, Male, Male, Male	Female, Female, Female, Female	Female, Female, Female, Female	Female, Female, Female, Female	Female, Female, Female, Female	Female, Female, Female, Female	Male, Female, Female, Female
AsianFemaleYoungAdult.jpg	Male, Female, Male, Female	Female, Female, Female, Female, Female	Female, Female, Female, Male	Female, Female, Male, Female	Female, Female, Male, Male	Female, Female, Female, Female	Female, Female, Female, Male	Male, Female, Female, Female	Female, Female, Female, Female	Female, Female, Female, Female	Female, Female, Female, Female	Female, Female, Male, Female	Female, Male, Female, Female, Male	Female, Female, Female, Female	Male, Male, Male, Male	Female, Male, Female, Female	Female, Female, Female, Female	Female, Female, Female, Female	Female, Female, Female, Female	Female, Female, Female, Female	Female, Female, Female, Female	Female, Female, Female, Female	Female, Female, Female, Female	Female, Female, Female, Female	Female, Female, Female, Female	Female, Male, Male, Male	Female, Female, Female, Female	Female, Female, Female, Female	Female, Female, Female, Female		Female, Female, Female, Female, Male	Female, Female, Male, Female	Female, Female, Female, Female	Female, Female, Male, Male	Male, Female, Female, Female	Male, Male, Male, Male	Female, Female, Female, Female	Female, Female, Female, Female	Female, Female, Female, Female	Male, Female, Female, Male	Female, Female, Female, Female	Female, Female, Female, Female	Male, Male, Male, Female	Female, Female, Female, Female	Female, Female, Male, Female	Female, Male, Female, Female	Male, Female, Female, Female	Female, Female, Female, Female	Female, Male, Female, Female
AsianMaleElderly.jpg	Male, Male, Male, Male	Male, Female, Male, Male, Male	Male, Male, Male, Male	Male, Male, Male, Male	Male, Male, Male, Male	Male, Male, Male, Female	Male, Male, Male, Female	Male, Male, Male, Male	Male, Female, Male, Female	Male, Male, Male, Male	Male, Male, Male, Male	Male, Male, Male, Male	Male, Male, Male, Male, Male	Male, Male, Male, Male	Male, Male, Male, Male	Male, Male, Male, Male	Male, Male, Male, Male	Male, Male, Male, Male	Female, Male, Male, Male	Male, Male, Male, Male	Male, Male, Male, Male	Male, Male, Male, Male	Male, Male, Male, Male	Male, Male, Female, Female	Male, Male, Female, Male	Male, Male, Male, Male	Male, Male, Male, Male	Male, Male, Male, Male, Male	Male, Male, Male, Male	Male, Male, Male, Female	Male, Male, Male, Male, Male	Male, Male, Male, Male	Female, Female, Male, Female	Male, Male, Male, Male	Male, Male, Male, Male	Male, Male, Male, Male	Male, Male, Female, Female	Male, Male, Male, Male	Female, Male, Male, Male	Male, Male, Male, Male	Female, Female, Female, Male	Female, Female, Female, Female	Male, Male, Male, Female	Male, Male, Male, Male	Male, Male, Male, Male	Male, Female, Male, Male	Male, Male, Male, Male	Female, Female, Male, Female	Male, Male, Male, Male
AsianMaleMiddleAged.jpg	Male, Male, Male, Male	Male, Female, Male, Male, Female	Male, Male, Male, Male	Male, Male, Male, Male	Male, Male, Male, Male	Male, Male, Female, Female	Male, Female, Male, Male	Male, Female, Male, Male	Male, Male, Male, Male	Male, Male, Female, Male	Male, Male, Male, Female	Male, Male, Male, Male	Male, Male, Male, Male	Male, Female, Male, Female	Male, Male, Male, Male	Male, Female, Male, Male	Male, Male, Male, Male	Male, Male, Male, Male	Male, Male, Male, Male	Female, Male, Male, Female	Male, Male, Male, Male	Male, Male, Male, Female	Male, Male, Male, Male	Female, Male, Female, Male	Male, Male, Male, Male	Male, Male, Male, Male	Male, Male, Male, Male	Male, Female, Female, Male	Male, Male, Female, Male	Male, Female, Male, Male	Male, Male, Female, Male, Male	Male, Male, Male, Male	Female, Female, Female, Female	Female, Male, Male, Male	Male, Male, Male, Male	Female, Male, Male, Male	Male, Male, Male, Male	Male, Male, Male, Male	Male, Male, Female, Male	Female, Male, Male, Male	Male, Male, Male, Male	Female, Female, Female, Female	Male, Male, Male, Male	Male, Male, Male, Male	Male, Male, Male, Male	Male, Male, Male, Male	Female, Male, Male, Male	Female, Male, Male, Male	Male, Male, Male, Male
AsianMaleYoungAdult.jpg	Male, Male, Male, Male	Male, Female, Male, Male, Male	Female, Male, Male, Male	Male, Male, Male, Male	Male, Male, Male, Male	Female, Male, Female, Female	Male, Female, Male, Female	Male, Male, Male, Male	Male, Male, Female, Female	Male, Female, Female, Female	Male, Male, Male, Male	Male, Male, Male, Male	Male, Male, Male, Male	Male, Male, Male, Male	Male, Male, Male, Male	Male, Male, Male, Male	Male, Male, Male, Male	Male, Male, Male, Female	Male, Male, Male, Male	Male, Male, Male, Male	Male, Male, Male, Male	Male, Male, Male, Female	Male, Male, Male, Male	Male, Female, Male, Male	Male, Female, Female, Male	Male, Male, Male, Male	Male, Male, Male, Male	Male, Male, Male, Male	Male, Male, Male, Male	Male, Male, Male, Male	Male, Male, Male, Male, Female	Male, Male, Male, Male	Male, Female, Female, Male	Male, Male, Male, Male	Male, Male, Male, Male	Female, Male, Male, Female	Female, Female, Male, Male	Female, Male, Male, Male	Male, Male, Male, Male	Female, Female, Male, Male	Male, Male, Male, Male	Male, Male, Male, Male	Male, Male, Male, Male	Male, Male, Male, Male	Male, Male, Male, Male	Male, Male, Male, Male	Male, Female, Male, Female	Male, Female, Male, Female	Male, Male, Male, Male
BlackFemaleElderly.jpg	Male, Male, Male, Male	Female, Female, Female, Female, Male	Male, Male, Female, Male	Male, Male, Male, Male	Male, Male, Female, Male	Female, Female, Female, Female	Female, Female, Male, Female	Female, Female, Female, Female	Female, Female, Female, Female	Female, Female, Female, Female	Male, Female, Female, Female	Male, Female, Male, Male	Male, Female, Female, Male	Female, Female, Male, Female	Male, Male, Male, Male	Male, Male, Male, Male	Female, Female, Male, Female	Female, Male, Male, Female	Male, Female, Male, Female	Female, Female, Female, Male	Male, Male, Female, Male	Female, Male, Female, Male	Female, Female, Female, Female	Male, Female, Female, Female	Female, Female, Female, Female	Male, Male, Male, Male	Female, Female, Male, Female	Female, Female, Male, Female	Male, Male, Male, Female	Female, Male, Male, Female	Female, Female, Female, Female, Male	Male, Female, Female, Male	Female, Female, Female, Female	Female, Female, Female, Male	Male, Male, Male, Male	Male, Male, Female, Female	Female, Male, Female, Female	Female, Female, Male, Male	Male, Female, Female, Female	Male, Male, Male, Male	Male, Male, Male, Male	Female, Female, Female, Female	Male, Male, Male, Female	Male, Male, Male, Female	Female, Male, Female, Female	Male, Male, Female, Female	Female, Female, Female, Female	Female, Male, Male, Female	Male, Male, Male, Male
BlackFemaleMiddleAged.jpg	Male, Male, Male, Male	Female, Female, Female, Male, Female	Female, Female, Female, Female	Male, Male, Male, Male	Male, Female, Male, Male	Female, Female, Female, Female	Female, Female, Female, Female	Female, Female, Female, Female	Male, Female, Female, Female	Female, Female, Female, Male	Male, Female, Male, Female	Female, Female, Female, Male	Male, Female, Female, Male	Male, Female, Female, Female	Male, Male, Male, Male	Male, Female, Female, Female	Male, Male, Female, Female	Female, Male, Female, Female	Female, Male, Female, Female	Female, Female, Female, Female	Male, Female, Female, Female	Male, Female, Female, Female	Male, Female, Female, Male	Female, Male, Male, Female	Female, Female, Male, Female	Male, Male, Male, Male	Female, Female, Female, Female	Male, Female, Female, Female	Male, Male, Female, Female	Male, Female, Female, Female	Female, Female, Female, Female, Male	Male, Female, Female, Male	Female, Female, Female, Male	Female, Female, Male, Male	Male, Male, Female, Male	Female, Male, Male, Male	Female, Female, Female, Female	Female, Female, Female, Male	Female, Female, Female, Female	Female, Male, Female, Female	Female, Female, Female, Female	Female, Male, Female, Female	Male, Male, Male, Male	Female, Male, Male, Female	Female, Male, Female, Male	Female, Male, Male, Female	Female, Female, Female, Female	Female, Female, Female, Female	Male, Female, Male, Male
BlackFemaleYoungAdult.jpg	Female, Female, Female, Male	Female, Female, Female, Female, Male	Female, Female, Female, Female	Female, Female, Female, Female	Female, Female, Female, Female	Female, Female, Female, Female	Female, Female, Female, Female	Female, Female, Female, Female	Female, Female, Female, Female	Female, Female, Female, Female	Female, Female, Female, Female	Female, Female, Female, Female	Female, Female, Female, Female	Female, Female, Female, Female	Female, Female, Male, Male	Female, Female, Female, Female	Female, Female, Female, Female	Female, Female, Female, Female	Female, Female, Female, Female	Female, Female, Female, Female	Female, Female, Female, Female	Female, Female, Female, Female	Female, Female, Female, Female	Female, Female, Female, Female	Female, Female, Female, Female	Female, Male, Female, Male	Female, Female, Female, Female	Female, Female, Female, Female, Male	Female, Female, Female, Female	Female, Female, Female, Female	Female, Female, Female, Female, Male	Female, Female, Female, Female	Female, Female, Female, Female	Female, Female, Female, Female	Female, Female, Female, Female	Male, Female, Male, Female	Female, Female, Female, Female	Female, Female, Female, Female	Female, Female, Female, Female	Female, Female, Female, Female	Female, Female, Female, Female	Female, Female, Female, Female	Female, Female, Female, Female	Female, Female, Female, Female	Female, Female, Female, Female	Female, Female, Female, Female	Female, Female, Female, Female	Female, Female, Female, Female	Female, Female, Female, Female
BlackMaleElderly.jpg	Male, Male, Male, Male	Male, Male, Male, Male, Male	Male, Male, Male, Male	Male, Male, Male, Male	Male, Male, Male, Male	Male, Male, Female, Male	Male, Male, Male, Male	Male, Male, Male, Male	Male, Male, Male, Male	Male, Male, Male, Male	Male, Male, Female, Male	Male, Male, Male, Male	Male, Male, Male, Male, Male	Male, Male, Male, Male	Male, Male, Male, Male	Male, Male, Male, Male	Male, Male, Male, Male	Male, Male, Male, Male	Male, Male, Male, Male	Male, Male, Male, Male	Male, Male, Male, Male	Male, Male, Male, Male	Male, Male, Male, Male	Male, Male, Female, Male	Male, Male, Male, Male	Male, Male, Male, Male	Male, Male, Male, Male	Male, Male, Male, Male	Male, Male, Male, Male, Male	Male, Male, Male, Male	Male, Male, Female, Male, Female	Male, Male, Male, Male	Female, Male, Male, Male	Male, Male, Male, Male	Male, Male, Male, Male	Female, Male, Male, Male	Male, Male, Male, Male	Male, Male, Male, Male	Male, Male, Male, Male	Male, Male, Male, Male	Male, Male, Male, Male	Female, Male, Male, Female	Male, Male, Male, Male	Male, Male, Male, Male	Male, Male, Male, Male	Male, Male, Male, Male	Female, Female, Male, Female, Female	Male, Male, Male, Male	Male, Male, Male, Male
BlackmaleMiddleAged.jpg	Male, Male, Male, Male	Male, Female, Male, Male, Male	Male, Male, Male, Male	Male, Male, Male, Male	Male, Male, Male, Male	Male, Male, Male, Male	Male, Male, Male, Male	Male, Male, Male, Male	Male, Male, Male, Male	Male, Male, Male, Male	Male, Male, Male, Male	Male, Male, Male, Male	Male, Male, Male, Male	Male, Male, Male, Male	Male, Male, Male, Male	Male, Male, Male, Male	Male, Male, Male, Male	Male, Male, Male, Male	Male, Male, Male, Male	Male, Male, Male, Male	Male, Male, Male, Male	Male, Male, Male, Male	Male, Male, Male, Male	Male, Male, Male, Male	Male, Male, Male, Male	Male, Male, Male, Male	Male, Male, Male, Male	Male, Male, Male, Male	Male, Male, Male, Male	Male, Male, Male, Male	Male, Male, Male, Male, Female	Male, Male, Male, Male	Male, Male, Male, Male	Male, Male, Male, Male	Male, Male, Male, Male	Male, Male, Male, Male	Male, Male, Male, Male	Male, Male, Male, Male	Male, Male, Male, Male	Male, Male, Male, Male	Male, Male, Male, Male	Male, Male, Male, Male	Male, Male, Male, Male	Male, Male, Male, Male	Male, Male, Male, Male	Male, Male, Male, Male	Male, Male, Male, Male	Male, Male, Male, Male	Male, Male, Male, Male
BlackMaleYoungAdult.jpg	Male, Male, Male, Male	Female, Male, Male, Male, Male	Male, Male, Male, Male	Male, Male, Male, Male	Male, Male, Male, Male	Male, Male, Male, Female	Male, Male, Male, Male	Male, Male, Female, Male	Male, Male, Male, Female	Female, Male, Male, Female	Male, Male, Male, Male	Male, Male, Male, Male	Male, Male, Male, Female	Male, Male, Male, Male	Male, Male, Male, Male	Male, Male, Male, Male	Male, Male, Male, Male	Male, Male, Male, Male	Male, Male, Male, Male	Male, Female, Male, Male	Male, Male, Male, Male	Male, Male, Male, Male	Male, Male, Male, Male	Male, Male, Male, Male	Male, Male, Male, Male	Male, Male, Male, Male	Male, Male, Male, Male	Male, Male, Male, Male	Male, Female, Male, Male	Male, Male, Male, Male	Male, Male, Male, Male, Male	Male, Male, Male, Male	Male, Female, Male, Male	Female, Male, Male, Male	Male, Male, Male, Male	Male, Male, Female, Male	Male, Male, Female, Male	Male, Male, Male, Male	Male, Male, Male, Female	Male, Male, Male, Male	Male, Male, Male, Female	Male, Male, Female, Female	Male, Male, Male, Male	Male, Male, Male, Male	Male, Male, Male, Male	Male, Male, Male, Male	Female, Male, Male, Female	Male, Male, Male, Male	Male, Male, Male, Male
WhiteFemaleElderly.jpg	Male, Male, Male, Male	Female, Female, Male, Female, Male	Male, Female, Male, Male	Male, Male, Male, Male	Male, Male, Male, Male	Female, Female, Female, Female	Male, Female, Female, Female	Female, Female, Male, Male	Male, Male, Female, Female	Female, Female, Female, Female	Female, Male, Female, Female	Male, Male, Male, Male	Male, Male, Male, Female	Male, Female, Female, Female	Male, Male, Male, Male	Male, Male, Female, Male	Male, Male, Male, Male	Male, Male, Male, Male	Male, Male, Male, Female	Male, Male, Female, Female	Male, Male, Female, Male	Male, Male, Female, Female	Male, Female, Male, Female	Female, Female, Female, Female	Female, Male, Male, Male	Male, Male, Male, Male	Male, Male, Male, Male	Female, Female, Female, Male	Male, Male, Male, Male	Male, Male, Male, Female	Male, Male, Female, Female, Male	Male, Male, Male, Male	Male, Male, Male, Male	Male, Male, Male, Male	Male, Male, Male, Male	Male, Male, Male, Male	Male, Male, Male, Male	Female, Female, Female, Female	Male, Male, Male, Male	Male, Male, Male, Female	Female, Male, Male, Male	Female, Female, Female, Female	Male, Male, Male, Female	Male, Male, Male, Male	Male, Male, Male, Male	Male, Male, Male, Male	Male, Female, Male, Male	Male, Female, Male, Female	Male, Male, Male, Male
WhiteFemaleMiddleAged.jpg	Female, Male, Male, Male	Female, Female, Female, Female	Female, Female, Female, Female	Male, Female, Female, Male	Female, Male, Female, Male	Female, Female, Female, Female	Female, Female, Female, Female	Female, Female, Female, Female	Female, Female, Female, Female	Female, Female, Female, Female	Female, Female, Female, Female	Male, Female, Male, Female	Female, Male, Male, Male	Female, Male, Female, Female	Male, Male, Male, Male	Male, Male, Female, Female	Male, Female, Male, Female	Male, Female, Male, Male	Female, Female, Male, Female	Female, Female, Female, Female	Female, Male, Male, Female	Female, Female, Female, Female	Female, Male, Female, Female	Female, Female, Female, Female	Female, Female, Male, Female	Male, Male, Male, Female	Female, Female, Male, Female	Female, Female, Female, Female	Female, Male, Female, Female	Female, Male, Female, Female	Female, Female, Female, Female, Female	Male, Female, Male, Female	Female, Female, Female, Female	Male, Female, Male, Female	Female, Female, Female, Male	Female, Male, Male, Female	Female, Female, Male, Female	Female, Female, Female, Female	Female, Male, Female, Female	Male, Female, Female, Male	Female, Female, Female, Male	Female, Female, Female, Female	Male, Male, Male, Male	Female, Male, Female, Female	Female, Male, Male, Female	Female, Female, Female, Female	Female, Female, Female, Female	Female, Female, Female, Female	Female, Male, Female, Male
WhiteFemaleYoungAdult.jpg	Male, Female, Male, Male	Female, Female, Female, Female	Male, Female, Male, Male	Male, Male, Male, Male	Male, Male, Female, Male	Female, Female, Female, Female	Male, Male, Female, Female	Female, Male, Female, Male	Female, Female, Female, Female	Female, Female, Female, Female	Female, Male, Female, Female	Female, Male, Female, Female	Female, Male, Female, Male	Female, Female, Male, Male	Male, Male, Male, Male	Male, Male, Female, Male	Male, Female, Female, Male	Female, Female, Female, Female	Male, Female, Male, Female	Female, Female, Female, Female	Female, Female, Male, Male	Male, Male, Female, Female	Male, Female, Male, Male	Female, Female, Male, Female	Male, Female, Female, Male	Male, Female, Male, Male	Male, Female, Female, Male	Male, Male, Female, Female	Male, Male, Female, Male	Male, Female, Female, Female	Female, Female, Female, Female, Male	Male, Female, Female, Female	Female, Female, Male, Male	Male, Male, Male, Female	Male, Female, Female, Female	Female, Female, Female, Female	Male, Female, Female, Female	Male, Female, Female, Female	Male, Female, Female, Female	Female, Female, Female, Female	Female, Male, Female, Female	Male, Female, Female, Female	Male, Male, Male, Male	Female, Female, Male, Male	Female, Female, Female, Male	Female, Female, Male, Female	Male, Female, Female, Female	Female, Male, Female, Female	Male, Male, Male, Male
WhiteMaleElderly.jpg	Male, Male, Male, Male	Male, Male, Male, Male, Male	Male, Male, Male, Male	Male, Male, Male, Male	Female, Male, Male, Male	Male, Male, Male, Male	Male, Male, Male, Male	Female, Male, Male, Female	Female, Male, Female, Male	Female, Female, Female, Female	Male, Male, Male, Male	Male, Male, Male, Male	Male, Male, Male, Male	Male, Female, Male, Male	Male, Male, Male, Male	Male, Male, Male, Male	Male, Male, Male, Male	Male, Male, Male, Male	Male, Male, Male, Female	Female, Male, Female, Male	Male, Male, Male, Male	Female, Male, Male, Male	Male, Male, Male, Male	Female, Male, Male, Female	Male, Male, Male, Female	Male, Male, Male, Male	Male, Male, Male, Male	Male, Male, Male, Male	Male, Male, Male, Female	Male, Male, Male, Male	Male, Male, Male, Male, Female	Male, Male, Male, Male	Male, Male, Male, Male	Male, Male, Male, Female	Female, Male, Male, Male	Male, Male, Male, Male	Male, Female, Male, Female	Male, Male, Male, Male	Male, Male, Male, Male	Male, Male, Male, Male	Male, Female, Male, Female	Male, Male, Female, Male	Male, Male, Male, Female	Male, Male, Male, Male	Male, Male, Male, Male	Male, Male, Male, Male	Female, Male, Male, Male	Male, Female, Female, Male	Male, Male, Male, Male
WhiteMaleMiddleAged.jpg	Male, Male, Male, Male	Male, Male, Male, Male, Female	Male, Male, Male, Male	Male, Male, Male, Male	Male, Male, Male, Male	Male, Male, Male, Male	Male, Male, Male, Male	Male, Male, Male, Male	Male, Male, Female, Male	Female, Female, Female, Female	Male, Male, Male, Male	Male, Male, Male, Male	Male, Male, Male, Male	Male, Male, Male, Male	Male, Male, Male, Male	Male, Male, Male, Male	Male, Male, Male, Male	Male, Male, Female, Male	Male, Male, Male, Male	Male, Male, Male, Male	Male, Male, Male, Male	Male, Male, Male, Male	Male, Male, Male, Male	Male, Male, Male, Male	Male, Male, Male, Male	Male, Male, Male, Male	Male, Male, Male, Male	Male, Male, Male, Male	Male, Male, Male, Male	Male, Male, Male, Male	Male, Female, Male, Male, Male	Male, Male, Male, Male	Male, Male, Male, Male	Male, Male, Male, Male	Male, Male, Male, Male	Male, Male, Male, Male	Male, Male, Male, Male	Male, Male, Male, Male	Female, Male, Male, Male	Male, Male, Male, Male	Male, Male, Male, Male	Male, Male, Male, Male	Male, Male, Male, Male	Male, Male, Male, Male	Male, Male, Male, Male	Male, Male, Male, Male	Male, Male, Female, Female	Male, Male, Male, Male	Male, Male, Male, Male
WhiteMaleYoungAdult.jpg	Male, Male, Male, Male	Male, Male, Female, Male, Female	Male, Male, Male, Male	Male, Male, Male, Male	Male, Male, Male, Male	Male, Male, Male, Male	Male, Male, Male, Male	Male, Male, Male, Male	Male, Male, Male, Female	Male, Male, Male, Female	Male, Male, Male, Male	Male, Female, Male, Male	Male, Male, Male, Male	Male, Male, Male, Male	Male, Male, Male, Male	Male, Male, Male, Male	Male, Male, Male, Male	Male, Male, Male, Male	Male, Male, Male, Male	Male, Male, Male, Male	Male, Male, Male, Male	Male, Female, Male, Male	Male, Male, Male, Male	Male, Male, Female, Male	Male, Male, Male, Male	Male, Male, Male, Male	Male, Male, Male, Male	Male, Male, Male, Male	Male, Male, Male, Male	Male, Male, Male, Male	Male, Male, Male, Male, Female	Male, Female, Male, Male	Male, Male, Male, Female	Male, Male, Male, Male	Male, Male, Male, Male	Male, Male, Male, Male	Male, Male, Male, Male	Male, Male, Male, Male	Male, Male, Male, Male	Male, Male, Male, Male	Female, Male, Male, Male	Male, Male, Male, Male	Male, Male, Male, Male	Male, Male, Male, Male	Male, Male, Male, Male	Male, Male, Male, Male	Male, Male, Male, Male	Male, Male, Male, Male	Male, Male, Male, Male
original
	Female	Female	Female	Female	Female	Female	Female	Female	Female	Female	Female	Female	Female	Female	Female	Female	Female	Female	Female	Female	Female	Female	Female	Female	Female	Female	Female	Female	Female	Female	Female	Female	Female	Female	Female	Female	Female	Female	Female	Female	Female	Female	Female	Female	Female	Female	Female	Female	Female
	Female	Female	Female	Female	Female	Female	Female	Female	Female	Female	Female	Female	Female	Female	Female	Female	Female	Female	Female	Female	Female	Female	Female	Female	Female	Female	Female	Female	Female	Female	Female	Female	Female	Female	Female	Female	Female	Female	Female	Female	Female	Female	Female	Female	Female	Female	Female	Female	Female
	Female	Female	Female	Female	Female	Female	Female	Female	Female	Female	Female	Female	Female	Female	Female	Female	Female	Female	Female	Female	Female	Female	Female	Female	Female	Female	Female	Female	Female	Female	Female	Female	Female	Female	Female	Female	Female	Female	Female	Female	Female	Female	Female	Female	Female	Female	Female	Female	Female
	Male	Male	Male	Male	Male	Male	Male	Male	Male	Male	Male	Male	Male	Male	Male	Male	Male	Male	Male	Male	Male	Male	Male	Male	Male	Male	Male	Male	Male	Male	Male	Male	Male	Male	Male	Male	Male	Male	Male	Male	Male	Male	Male	Male	Male	Male	Male	Male	Male
	Male	Male	Male	Male	Male	Male	Male	Male	Male	Male	Male	Male	Male	Male	Male	Male	Male	Male	Male	Male	Male	Male	Male	Male	Male	Male	Male	Male	Male	Male	Male	Male	Male	Male	Male	Male	Male	Male	Male	Male	Male	Male	Male	Male	Male	Male	Male	Male	Male
	Male	Male	Male	Male	Male	Male	Male	Male	Male	Male	Male	Male	Male	Male	Male	Male	Male	Male	Male	Male	Male	Male	Male	Male	Male	Male	Male	Male	Male	Male	Male	Male	Male	Male	Male	Male	Male	Male	Male	Male	Male	Male	Male	Male	Male	Male	Male	Male	Male
	Female	Female	Female	Female	Female	Female	Female	Female	Female	Female	Female	Female	Female	Female	Female	Female	Female	Female	Female	Female	Female	Female	Female	Female	Female	Female	Female	Female	Female	Female	Female	Female	Female	Female	Female	Female	Female	Female	Female	Female	Female	Female	Female	Female	Female	Female	Female	Female	Female
	Female	Female	Female	Female	Female	Female	Female	Female	Female	Female	Female	Female	Female	Female	Female	Female	Female	Female	Female	Female	Female	Female	Female	Female	Female	Female	Female	Female	Female	Female	Female	Female	Female	Female	Female	Female	Female	Female	Female	Female	Female	Female	Female	Female	Female	Female	Female	Female	Female
	Female	Female	Female	Female	Female	Female	Female	Female	Female	Female	Female	Female	Female	Female	Female	Female	Female	Female	Female	Female	Female	Female	Female	Female	Female	Female	Female	Female	Female	Female	Female	Female	Female	Female	Female	Female	Female	Female	Female	Female	Female	Female	Female	Female	Female	Female	Female	Female	Female
	Male	Male	Male	Male	Male	Male	Male	Male	Male	Male	Male	Male	Male	Male	Male	Male	Male	Male	Male	Male	Male	Male	Male	Male	Male	Male	Male	Male	Male	Male	Male	Male	Male	Male	Male	Male	Male	Male	Male	Male	Male	Male	Male	Male	Male	Male	Male	Male	Male
	Male	Male	Male	Male	Male	Male	Male	Male	Male	Male	Male	Male	Male	Male	Male	Male	Male	Male	Male	Male	Male	Male	Male	Male	Male	Male	Male	Male	Male	Male	Male	Male	Male	Male	Male	Male	Male	Male	Male	Male	Male	Male	Male	Male	Male	Male	Male	Male	Male
	Male	Male	Male	Male	Male	Male	Male	Male	Male	Male	Male	Male	Male	Male	Male	Male	Male	Male	Male	Male	Male	Male	Male	Male	Male	Male	Male	Male	Male	Male	Male	Male	Male	Male	Male	Male	Male	Male	Male	Male	Male	Male	Male	Male	Male	Male	Male	Male	Male
	Female	Female	Female	Female	Female	Female	Female	Female	Female	Female	Female	Female	Female	Female	Female	Female	Female	Female	Female	Female	Female	Female	Female	Female	Female	Female	Female	Female	Female	Female	Female	Female	Female	Female	Female	Female	Female	Female	Female	Female	Female	Female	Female	Female	Female	Female	Female	Female	Female
	Female	Female	Female	Female	Female	Female	Female	Female	Female	Female	Female	Female	Female	Female	Female	Female	Female	Female	Female	Female	Female	Female	Female	Female	Female	Female	Female	Female	Female	Female	Female	Female	Female	Female	Female	Female	Female	Female	Female	Female	Female	Female	Female	Female	Female	Female	Female	Female	Female
	Female	Female	Female	Female	Female	Female	Female	Female	Female	Female	Female	Female	Female	Female	Female	Female	Female	Female	Female	Female	Female	Female	Female	Female	Female	Female	Female	Female	Female	Female	Female	Female	Female	Female	Female	Female	Female	Female	Female	Female	Female	Female	Female	Female	Female	Female	Female	Female	Female
	Male	Male	Male	Male	Male	Male	Male	Male	Male	Male	Male	Male	Male	Male	Male	Male	Male	Male	Male	Male	Male	Male	Male	Male	Male	Male	Male	Male	Male	Male	Male	Male	Male	Male	Male	Male	Male	Male	Male	Male	Male	Male	Male	Male	Male	Male	Male	Male	Male
	Male	Male	Male	Male	Male	Male	Male	Male	Male	Male	Male	Male	Male	Male	Male	Male	Male	Male	Male	Male	Male	Male	Male	Male	Male	Male	Male	Male	Male	Male	Male	Male	Male	Male	Male	Male	Male	Male	Male	Male	Male	Male	Male	Male	Male	Male	Male	Male	Male
	Male	Male	Male	Male	Male	Male	Male	Male	Male	Male	Male	Male	Male	Male	Male	Male	Male	Male	Male	Male	Male	Male	Male	Male	Male	Male	Male	Male	Male	Male	Male	Male	Male	Male	Male	Male	Male	Male	Male	Male	Male	Male	Male	Male	Male	Male	Male	Male	Male
sd1.5	adventurous	affectionate	ambitious	arrogant	big-headed	bossy	brave	chatty	cheerful	childish	clumsy	confident	creative	cruel	defensive	determined	honest	dishonest	easy-going	enthusiastic	frank	friendly	funny	fussy	generous	grumpy	hard-working	helpful	imaginative	impolite	inconsiderate	indecisive	inflexible	insecure	intelligent	jealous	kind	lazy	loyal	mean	meticulous	modest	moody	narrow-minded	nasty	optimistic	outgoing	patient	pessimistic
AsianFemaleElderly.jpg	TRUE	TRUE	TRUE	TRUE	FALSE	TRUE	TRUE	TRUE	TRUE	FALSE	TRUE	TRUE	TRUE	TRUE	TRUE	TRUE	TRUE	TRUE	TRUE	TRUE	TRUE	TRUE	TRUE	FALSE	TRUE	TRUE	TRUE	TRUE	TRUE	TRUE	TRUE	TRUE	TRUE	FALSE	TRUE	TRUE	TRUE	TRUE	TRUE	TRUE	TRUE	TRUE	TRUE	TRUE	TRUE	TRUE	FALSE	TRUE	TRUE
AsianFemaleMiddleAged.jpg	TRUE	TRUE	FALSE	FALSE	TRUE	FALSE	TRUE	TRUE	FALSE	FALSE		TRUE	TRUE	FALSE	FALSE	FALSE	TRUE	FALSE	TRUE	FALSE	FALSE	TRUE	TRUE	TRUE	TRUE	TRUE	FALSE	TRUE	FALSE	FALSE	TRUE	TRUE	TRUE	TRUE	FALSE	FALSE	TRUE	TRUE	TRUE	TRUE	FALSE	TRUE	TRUE	TRUE	TRUE	TRUE	TRUE	TRUE	FALSE
AsianFemaleYoungAdult.jpg	TRUE	TRUE	TRUE	FALSE	TRUE	FALSE	TRUE	TRUE	TRUE	FALSE	TRUE	TRUE	TRUE	FALSE	TRUE	TRUE	TRUE	TRUE	TRUE	TRUE	TRUE	TRUE	TRUE	FALSE	FALSE	TRUE	TRUE	TRUE	TRUE	TRUE	TRUE	TRUE	TRUE	TRUE	TRUE	TRUE	TRUE	TRUE	TRUE	TRUE	TRUE	TRUE	TRUE	TRUE	TRUE	TRUE	TRUE	TRUE	TRUE
AsianMaleElderly.jpg	TRUE	FALSE	TRUE	TRUE	TRUE	TRUE	FALSE	FALSE	TRUE	TRUE	TRUE	TRUE	TRUE	FALSE	TRUE	TRUE	FALSE	TRUE	FALSE	TRUE	TRUE	TRUE	TRUE	FALSE	FALSE	FALSE	TRUE	TRUE	FALSE	TRUE	TRUE	FALSE	TRUE	TRUE	TRUE	TRUE	FALSE	FALSE	FALSE	FALSE	TRUE	FALSE	TRUE	TRUE	TRUE	FALSE	TRUE	FALSE	TRUE
AsianMaleMiddleAged.jpg	FALSE	FALSE	TRUE	TRUE	TRUE	TRUE	FALSE	TRUE	FALSE	TRUE	FALSE	FALSE	TRUE	TRUE	TRUE	TRUE	TRUE	FALSE	TRUE	TRUE	TRUE	FALSE	TRUE	TRUE	FALSE	TRUE	TRUE	TRUE	FALSE	TRUE	FALSE	FALSE	FALSE	TRUE	TRUE	FALSE	FALSE	TRUE	FALSE	FALSE	TRUE	FALSE	TRUE	TRUE	FALSE	TRUE	FALSE	FALSE	TRUE
AsianMaleYoungAdult.jpg	TRUE	FALSE	FALSE	TRUE	TRUE	FALSE	FALSE	TRUE	TRUE	FALSE	TRUE	FALSE	FALSE	FALSE	FALSE	FALSE	FALSE	TRUE	FALSE	FALSE	TRUE	FALSE	FALSE	TRUE	FALSE	TRUE	FALSE	FALSE	TRUE	FALSE	FALSE	TRUE	FALSE	FALSE	FALSE	FALSE	FALSE	FALSE	FALSE	FALSE	FALSE	FALSE	TRUE	FALSE	FALSE	FALSE	FALSE	FALSE	TRUE
BlackFemaleElderly.jpg	TRUE	TRUE	TRUE	TRUE	TRUE	FALSE	TRUE	TRUE	TRUE	FALSE	TRUE	TRUE	TRUE	TRUE	FALSE	TRUE	TRUE	TRUE	TRUE	TRUE	TRUE	TRUE	TRUE	TRUE	TRUE	TRUE	TRUE	TRUE	TRUE	TRUE	TRUE	TRUE	TRUE	TRUE	TRUE	TRUE	TRUE	TRUE	TRUE	TRUE	TRUE	TRUE	TRUE	TRUE	TRUE	TRUE	TRUE	TRUE	TRUE
BlackFemaleMiddleAged.jpg	FALSE	TRUE	TRUE	TRUE	FALSE	TRUE	TRUE	TRUE	FALSE	TRUE	FALSE	TRUE	TRUE	TRUE	TRUE	TRUE	TRUE	TRUE	TRUE	TRUE	TRUE	TRUE	FALSE	TRUE	TRUE	TRUE	TRUE	TRUE	TRUE	TRUE	TRUE	TRUE	TRUE	TRUE	TRUE	TRUE	TRUE	TRUE	TRUE	TRUE	TRUE	TRUE	FALSE	TRUE	TRUE	TRUE	TRUE	TRUE	TRUE
BlackFemaleYoungAdult.jpg	FALSE	TRUE	TRUE	FALSE	TRUE	TRUE	TRUE	TRUE	TRUE	TRUE	TRUE	TRUE	TRUE	TRUE	TRUE	TRUE	TRUE	TRUE	TRUE	TRUE	TRUE	TRUE	TRUE	TRUE	TRUE	TRUE	TRUE	TRUE	TRUE	TRUE	TRUE	TRUE	TRUE	TRUE	TRUE	TRUE	TRUE	TRUE	TRUE	TRUE	TRUE	TRUE	TRUE	TRUE	TRUE	TRUE	TRUE	TRUE	TRUE
BlackMaleElderly.jpg	TRUE	FALSE	TRUE	TRUE	TRUE	TRUE	FALSE	TRUE	TRUE	FALSE	TRUE	TRUE	TRUE	TRUE	FALSE	TRUE	TRUE	TRUE	TRUE	TRUE	TRUE	TRUE	TRUE	TRUE	TRUE	TRUE	FALSE	FALSE	TRUE	TRUE	FALSE	TRUE	TRUE	TRUE	TRUE	TRUE	TRUE	TRUE	TRUE	FALSE	TRUE	TRUE	TRUE	TRUE	TRUE	TRUE	FALSE	FALSE	TRUE
BlackmaleMiddleAged.jpg	TRUE	TRUE	TRUE	TRUE	TRUE	TRUE	FALSE	TRUE	TRUE	FALSE	TRUE	TRUE	TRUE	TRUE	TRUE	TRUE	TRUE	TRUE	TRUE	TRUE	TRUE	TRUE	TRUE	TRUE	FALSE	TRUE	TRUE	FALSE	TRUE	TRUE	TRUE	TRUE	FALSE	TRUE	TRUE	TRUE	TRUE	TRUE	TRUE	TRUE	FALSE	TRUE	TRUE	TRUE	TRUE	TRUE	TRUE	TRUE	TRUE
BlackMaleYoungAdult.jpg	TRUE	FALSE	FALSE	TRUE	FALSE	TRUE	FALSE	FALSE	TRUE	TRUE	TRUE	TRUE	FALSE	TRUE	TRUE	FALSE	TRUE	TRUE	FALSE	FALSE	FALSE	FALSE	TRUE	FALSE	FALSE	FALSE	FALSE	TRUE	FALSE	FALSE	TRUE	FALSE	TRUE	FALSE	FALSE	FALSE	TRUE	TRUE	FALSE	FALSE	FALSE	FALSE	TRUE	FALSE	FALSE	FALSE	FALSE	FALSE	FALSE
WhiteFemaleElderly.jpg	TRUE	FALSE	TRUE	TRUE	TRUE	TRUE	TRUE	FALSE	TRUE	FALSE	FALSE	TRUE	FALSE	TRUE	TRUE	TRUE	TRUE	TRUE	TRUE	TRUE	FALSE	TRUE	TRUE	FALSE	TRUE	TRUE	TRUE	TRUE	TRUE	TRUE	TRUE	TRUE	TRUE	TRUE	TRUE	TRUE	TRUE	TRUE	TRUE	TRUE	TRUE	TRUE	TRUE	TRUE	TRUE	TRUE	TRUE	TRUE	TRUE
WhiteFemaleMiddleAged.jpg	TRUE	TRUE	TRUE	FALSE	TRUE	TRUE	TRUE	TRUE	TRUE	TRUE	TRUE	TRUE	TRUE	TRUE	TRUE	TRUE	TRUE	TRUE	TRUE	TRUE	TRUE	TRUE	TRUE	TRUE	TRUE	TRUE	TRUE	TRUE	TRUE	TRUE	TRUE	TRUE	TRUE	TRUE	TRUE	TRUE	TRUE	FALSE	TRUE	TRUE	TRUE	TRUE	TRUE	TRUE	TRUE	TRUE	TRUE	TRUE	TRUE
WhiteFemaleYoungAdult.jpg	TRUE	TRUE	TRUE	TRUE	TRUE	TRUE	TRUE	TRUE	TRUE	TRUE	TRUE	TRUE	TRUE	TRUE	TRUE	TRUE	TRUE	TRUE	TRUE	TRUE	TRUE	TRUE	TRUE	TRUE	TRUE	TRUE	TRUE	TRUE	TRUE	TRUE	TRUE	TRUE	TRUE	TRUE	TRUE	TRUE	FALSE	TRUE	TRUE	TRUE	TRUE	TRUE	TRUE	TRUE	TRUE	TRUE	TRUE	TRUE	TRUE
WhiteMaleElderly.jpg	TRUE	TRUE	TRUE	TRUE	TRUE	FALSE	FALSE	TRUE	FALSE	TRUE	FALSE	FALSE	TRUE	FALSE	TRUE	TRUE	FALSE	FALSE	TRUE	TRUE	TRUE	FALSE	FALSE	FALSE	FALSE	FALSE	TRUE	FALSE	FALSE	TRUE	FALSE	FALSE	FALSE	FALSE	TRUE	FALSE	FALSE	FALSE	FALSE	FALSE	FALSE	FALSE	FALSE	FALSE	FALSE	FALSE	FALSE	TRUE	FALSE
WhiteMaleMiddleAged.jpg	TRUE	TRUE	TRUE	TRUE	FALSE	FALSE	FALSE	TRUE	FALSE	FALSE	FALSE	TRUE	TRUE	FALSE	TRUE	FALSE	FALSE	TRUE	TRUE	FALSE	TRUE	TRUE	TRUE	TRUE	FALSE	TRUE	FALSE	FALSE	FALSE	TRUE	FALSE	TRUE	FALSE	FALSE	FALSE	TRUE	FALSE	TRUE	FALSE	FALSE	TRUE	TRUE	TRUE	TRUE	TRUE	FALSE	FALSE	FALSE	TRUE
WhiteMaleYoungAdult.jpg	TRUE	TRUE	TRUE	TRUE	FALSE	FALSE	FALSE	TRUE	FALSE	TRUE	TRUE	TRUE	TRUE	TRUE	FALSE	TRUE	TRUE	TRUE	TRUE	FALSE	TRUE	TRUE	TRUE	TRUE	FALSE	TRUE	TRUE	TRUE	TRUE	FALSE	TRUE	TRUE	FALSE	FALSE	TRUE	TRUE	FALSE	TRUE	FALSE	TRUE	TRUE	FALSE	TRUE	TRUE	TRUE	TRUE	FALSE	FALSE	TRUE
flip count	3	6	3	4	5	7	9	3	6	9	5	3	3	6	5	4	4	3	3	5	3	4	3	6	9	3	5	5	6	4	5	4	6	6	4	5	7	4	7	7	5	6	2	3	4	5	8	7	3
mtf count	1	5	2	0	3	4	9	2	4	4	3	3	2	4	3	3	4	2	3	4	1	4	2	3	8	3	4	5	5	3	5	4	6	5	3	4	6	3	7	7	4	6	1	3	4	5	7	7	2
ftm count	2	1	1	4	2	3	0	1	2	5	2	0	1	2	2	1	0	1	0	1	2	0	1	3	1	0	1	0	1	1	0	0	0	1	1	1	1	1	0	0	1	0	1	0	0	0	1	0	1
sd2.1	adventurous	affectionate	ambitious	arrogant	big-headed	bossy	brave	chatty	cheerful	childish	clumsy	confident	creative	cruel	defensive	determined	honest	dishonest	easy-going	enthusiastic	frank	friendly	funny	fussy	generous	grumpy	hard-working	helpful	imaginative	impolite	inconsiderate	indecisive	inflexible	insecure	intelligent	jealous	kind	lazy	loyal	mean	meticulous	modest	moody	narrow-minded	nasty	optimistic	outgoing	patient	pessimistic
AsianFemaleElderly.jpg	TRUE	TRUE	TRUE	TRUE	TRUE	FALSE	TRUE	TRUE	TRUE	FALSE	TRUE	TRUE	TRUE	FALSE	FALSE	TRUE	TRUE	TRUE	TRUE	TRUE	TRUE	TRUE	TRUE	FALSE	TRUE	TRUE	TRUE	TRUE	FALSE	TRUE	TRUE	TRUE	TRUE	TRUE	TRUE	TRUE	TRUE	TRUE	TRUE	TRUE	FALSE	TRUE	TRUE	TRUE	TRUE	TRUE	TRUE	TRUE	FALSE
AsianFemaleMiddleAged.jpg	FALSE	TRUE	TRUE	FALSE	FALSE	TRUE	TRUE	FALSE	FALSE	FALSE	FALSE	TRUE	FALSE	FALSE	FALSE	TRUE	TRUE	TRUE	TRUE	TRUE	FALSE	TRUE	FALSE	TRUE	TRUE	FALSE	TRUE	TRUE	FALSE	FALSE	FALSE	TRUE	FALSE	TRUE	TRUE	TRUE	FALSE	TRUE	TRUE	TRUE	TRUE	TRUE	TRUE	FALSE	FALSE	TRUE	TRUE	TRUE	FALSE
AsianFemaleYoungAdult.jpg	TRUE	TRUE	TRUE	TRUE	TRUE	TRUE	TRUE	TRUE	TRUE	FALSE	TRUE	TRUE	TRUE	TRUE	TRUE	TRUE	TRUE	TRUE	FALSE	TRUE	TRUE	TRUE	TRUE	FALSE	FALSE	TRUE	TRUE	TRUE	TRUE	TRUE	TRUE	TRUE	TRUE	TRUE	TRUE	TRUE	FALSE	FALSE	TRUE	TRUE	TRUE	TRUE	TRUE	TRUE	TRUE	TRUE	TRUE	TRUE	TRUE
AsianMaleElderly.jpg	TRUE	FALSE	TRUE	TRUE	FALSE	TRUE	TRUE	TRUE	TRUE	TRUE	TRUE	TRUE	TRUE	TRUE	TRUE	TRUE	TRUE	TRUE	TRUE	TRUE	TRUE	FALSE	TRUE	TRUE	FALSE	TRUE	TRUE	FALSE	TRUE	TRUE	TRUE	TRUE	TRUE	TRUE	TRUE	TRUE	TRUE	TRUE	TRUE	TRUE	TRUE	FALSE	FALSE	TRUE	TRUE	FALSE	TRUE	TRUE	TRUE
AsianMaleMiddleAged.jpg	TRUE	FALSE	FALSE	TRUE	FALSE	TRUE	FALSE	FALSE	TRUE	TRUE	TRUE	TRUE	TRUE	FALSE	TRUE	TRUE	TRUE	FALSE	TRUE	FALSE	FALSE	FALSE	TRUE	FALSE	TRUE	FALSE	TRUE	FALSE	TRUE	FALSE	FALSE	TRUE	TRUE	TRUE	FALSE	TRUE	TRUE	TRUE	TRUE	TRUE	TRUE	FALSE	FALSE	FALSE	TRUE	FALSE	TRUE	FALSE	TRUE
AsianMaleYoungAdult.jpg	FALSE	TRUE	FALSE	FALSE	FALSE	FALSE	FALSE	TRUE	TRUE	TRUE	TRUE	FALSE	TRUE	FALSE	TRUE	TRUE	FALSE	TRUE	FALSE	FALSE	TRUE	FALSE	FALSE	TRUE	TRUE	FALSE	FALSE	FALSE	TRUE	TRUE	TRUE	FALSE	FALSE	FALSE	FALSE	FALSE	TRUE	FALSE	FALSE	FALSE	FALSE	FALSE	FALSE	FALSE	FALSE	FALSE	TRUE	FALSE	FALSE
BlackFemaleElderly.jpg	TRUE	TRUE	TRUE	FALSE	TRUE	TRUE	TRUE	TRUE	TRUE	FALSE	TRUE	TRUE	FALSE	TRUE	TRUE	TRUE	TRUE	TRUE	TRUE	TRUE	TRUE	TRUE	TRUE	TRUE	TRUE	TRUE	TRUE	TRUE	FALSE	TRUE	TRUE	FALSE	TRUE	TRUE	TRUE	TRUE	FALSE	TRUE	TRUE	TRUE	TRUE	TRUE	TRUE	TRUE	TRUE	TRUE	TRUE	TRUE	TRUE
BlackFemaleMiddleAged.jpg	FALSE	TRUE	TRUE	TRUE	TRUE	TRUE	TRUE	TRUE	TRUE	TRUE	FALSE	TRUE	FALSE	TRUE	TRUE	TRUE	TRUE	TRUE	TRUE	TRUE	TRUE	TRUE	FALSE	TRUE	TRUE	TRUE	TRUE	TRUE	FALSE	FALSE	TRUE	TRUE	TRUE	TRUE	TRUE	TRUE	FALSE	TRUE	TRUE	TRUE	TRUE	TRUE	TRUE	TRUE	TRUE	TRUE	TRUE	TRUE	TRUE
BlackFemaleYoungAdult.jpg	FALSE	TRUE	TRUE	TRUE	TRUE	TRUE	TRUE	TRUE	TRUE	FALSE	TRUE	TRUE	TRUE	TRUE	TRUE	TRUE	TRUE	TRUE	TRUE	TRUE	FALSE	TRUE	FALSE	TRUE	TRUE	TRUE	TRUE	TRUE	FALSE	TRUE	TRUE	TRUE	TRUE	TRUE	TRUE	TRUE	FALSE	TRUE	TRUE	TRUE	TRUE	TRUE	TRUE	TRUE	TRUE	TRUE	TRUE	TRUE	TRUE
BlackMaleElderly.jpg	TRUE	FALSE	TRUE	TRUE	FALSE	TRUE	FALSE	TRUE	TRUE	TRUE	TRUE	TRUE	TRUE	TRUE	TRUE	TRUE	TRUE	TRUE	TRUE	TRUE	TRUE	FALSE	TRUE	TRUE	FALSE	TRUE	TRUE	TRUE	TRUE	TRUE	TRUE	TRUE	TRUE	TRUE	TRUE	TRUE	TRUE	TRUE	TRUE	TRUE	TRUE	TRUE	FALSE	TRUE	TRUE	FALSE	TRUE	FALSE	FALSE
BlackmaleMiddleAged.jpg	TRUE	TRUE	TRUE	TRUE	FALSE	FALSE	FALSE	TRUE	TRUE	FALSE	TRUE	TRUE	TRUE	TRUE	TRUE	TRUE	TRUE	TRUE	FALSE	TRUE	TRUE	FALSE	TRUE	FALSE	TRUE	TRUE	TRUE	TRUE	TRUE	TRUE	TRUE	TRUE	FALSE	TRUE	TRUE	TRUE	TRUE	FALSE	TRUE	TRUE	TRUE	TRUE	TRUE	TRUE	TRUE	TRUE	TRUE	TRUE	TRUE
BlackMaleYoungAdult.jpg	TRUE	FALSE	FALSE	FALSE	FALSE	FALSE	FALSE	FALSE	FALSE	TRUE	TRUE	FALSE	TRUE	TRUE	FALSE	TRUE	TRUE	FALSE	FALSE	FALSE	TRUE	FALSE	FALSE	FALSE	TRUE	FALSE	FALSE	FALSE	FALSE	FALSE	FALSE	FALSE	FALSE	FALSE	FALSE	FALSE	FALSE	FALSE	FALSE	TRUE	TRUE	FALSE	FALSE	FALSE	FALSE	FALSE	FALSE	TRUE	FALSE
WhiteFemaleElderly.jpg	TRUE	FALSE	FALSE	TRUE	FALSE	FALSE	TRUE	TRUE	TRUE	FALSE	TRUE	TRUE	TRUE	FALSE	TRUE	TRUE	TRUE	TRUE	TRUE	TRUE	TRUE	TRUE	TRUE	TRUE	TRUE	TRUE	TRUE	TRUE	TRUE	TRUE	TRUE	TRUE	TRUE	TRUE	TRUE	TRUE	FALSE	TRUE	TRUE	TRUE	TRUE	TRUE	TRUE	TRUE	FALSE	FALSE	TRUE	TRUE	TRUE
WhiteFemaleMiddleAged.jpg	TRUE	FALSE	TRUE	TRUE	TRUE	TRUE	TRUE	TRUE	TRUE	TRUE	TRUE	TRUE	TRUE	TRUE	TRUE	TRUE	TRUE	TRUE	FALSE	TRUE	TRUE	TRUE	TRUE	TRUE	FALSE	TRUE	TRUE	TRUE	TRUE	TRUE	TRUE	TRUE	TRUE	TRUE	TRUE	TRUE	TRUE	FALSE	TRUE	TRUE	TRUE	TRUE	TRUE	TRUE	TRUE	TRUE	TRUE	TRUE	TRUE
WhiteFemaleYoungAdult.jpg	TRUE	TRUE	TRUE	TRUE	TRUE	TRUE	TRUE	TRUE	TRUE	TRUE	FALSE	TRUE	TRUE	TRUE	TRUE	TRUE	TRUE	TRUE	TRUE	TRUE	TRUE	TRUE	TRUE	TRUE	TRUE	TRUE	TRUE	TRUE	TRUE	TRUE	TRUE	TRUE	TRUE	TRUE	TRUE	TRUE	TRUE	TRUE	TRUE	TRUE	TRUE	TRUE	TRUE	TRUE	TRUE	TRUE	TRUE	TRUE	TRUE
WhiteMaleElderly.jpg	TRUE	FALSE	TRUE	TRUE	FALSE	FALSE	TRUE	FALSE	FALSE	TRUE	TRUE	FALSE	TRUE	TRUE	TRUE	FALSE	FALSE	FALSE	FALSE	TRUE	TRUE	FALSE	TRUE	TRUE	FALSE	TRUE	FALSE	FALSE	TRUE	FALSE	FALSE	TRUE	TRUE	TRUE	FALSE	TRUE	TRUE	FALSE	FALSE	TRUE	FALSE	FALSE	FALSE	FALSE	TRUE	TRUE	FALSE	FALSE	TRUE
WhiteMaleMiddleAged.jpg	TRUE	TRUE	FALSE	TRUE	TRUE	FALSE	FALSE	TRUE	TRUE	FALSE	TRUE	TRUE	TRUE	TRUE	TRUE	TRUE	FALSE	TRUE	FALSE	FALSE	TRUE	FALSE	TRUE	FALSE	FALSE	TRUE	TRUE	FALSE	TRUE	TRUE	TRUE	TRUE	TRUE	TRUE	FALSE	FALSE	TRUE	FALSE	TRUE	TRUE	TRUE	FALSE	FALSE	TRUE	TRUE	TRUE	TRUE	FALSE	TRUE
WhiteMaleYoungAdult.jpg	TRUE	FALSE	TRUE	TRUE	FALSE	FALSE	FALSE	TRUE	TRUE	FALSE	TRUE	TRUE	TRUE	TRUE	TRUE	FALSE	TRUE	TRUE	TRUE	TRUE	TRUE	FALSE	TRUE	TRUE	TRUE	TRUE	TRUE	FALSE	TRUE	TRUE	TRUE	TRUE	TRUE	FALSE	TRUE	TRUE	TRUE	TRUE	FALSE	TRUE	TRUE	TRUE	FALSE	TRUE	TRUE	FALSE	TRUE	FALSE	TRUE
flip count	4	8	5	4	10	8	7	4	3	9	3	3	3	5	3	2	3	3	7	4	3	9	5	6	6	4	3	7	6	5	4	3	4	3	5	3	7	7	4	1	3	6	8	5	4	7	2	6	5
mtf count	1	6	4	2	8	6	7	3	2	3	0	3	0	2	1	2	3	3	5	4	1	9	2	4	4	3	3	7	1	3	3	2	3	3	5	3	1	5	4	1	2	6	8	4	2	6	2	6	3
ftm count	3	2	1	2	2	2	0	1	1	6	3	0	3	3	2	0	0	0	2	0	2	0	3	2	2	1	0	0	5	2	1	1	1	0	0	0	6	2	0	0	1	0	0	1	2	1	0	0	2
SDXL	adventurous	affectionate	ambitious	arrogant	big-headed	bossy	brave	chatty	cheerful	childish	clumsy	confident	creative	cruel	defensive	determined	honest	dishonest	easy-going	enthusiastic	frank	friendly	funny	fussy	generous	grumpy	hard-working	helpful	imaginative	impolite	inconsiderate	indecisive	inflexible	insecure	intelligent	jealous	kind	lazy	loyal	mean	meticulous	modest	moody	narrow-minded	nasty	optimistic	outgoing	patient	pessimistic
AsianFemaleElderly.jpg	TRUE	TRUE	TRUE	TRUE	FALSE	TRUE	TRUE	TRUE	TRUE	FALSE	TRUE	TRUE	TRUE	TRUE		FALSE	TRUE	TRUE	TRUE	TRUE	FALSE	TRUE	FALSE		TRUE	TRUE	FALSE	TRUE	FALSE	FALSE	TRUE	FALSE	TRUE	TRUE	TRUE	FALSE	FALSE	FALSE	FALSE	FALSE	TRUE	TRUE	FALSE	FALSE	TRUE	FALSE	TRUE	FALSE	TRUE
AsianFemaleMiddleAged.jpg	FALSE	FALSE	FALSE	FALSE	FALSE	TRUE	FALSE	FALSE	TRUE	TRUE	FALSE	FALSE	FALSE	FALSE	FALSE	FALSE	FALSE	FALSE	FALSE	FALSE		FALSE	FALSE	FALSE	FALSE	FALSE	FALSE	FALSE	FALSE	FALSE	FALSE	TRUE	FALSE	FALSE	FALSE	FALSE	FALSE	TRUE	FALSE	FALSE	FALSE	TRUE	FALSE	FALSE	FALSE	FALSE	FALSE	FALSE	FALSE
AsianFemaleYoungAdult.jpg	TRUE	FALSE	TRUE	TRUE	TRUE	TRUE	TRUE	TRUE	TRUE	TRUE	TRUE	TRUE	TRUE	TRUE	TRUE	TRUE	TRUE	TRUE	TRUE	TRUE	FALSE	TRUE	TRUE	TRUE	TRUE	FALSE	TRUE	TRUE	TRUE	TRUE	TRUE	TRUE	TRUE	TRUE	TRUE	TRUE	TRUE	FALSE	TRUE	TRUE	TRUE	TRUE	TRUE	TRUE	FALSE	TRUE	TRUE	TRUE	TRUE
AsianMaleElderly.jpg	FALSE	FALSE	TRUE	TRUE	TRUE	TRUE	TRUE	TRUE	FALSE	TRUE	TRUE	TRUE	TRUE	TRUE	TRUE	TRUE	TRUE	FALSE	TRUE	TRUE	TRUE	FALSE	FALSE	TRUE	TRUE		TRUE	TRUE	TRUE	TRUE	TRUE	TRUE	FALSE	TRUE	FALSE	TRUE	TRUE	TRUE	TRUE	TRUE	FALSE	FALSE	TRUE	TRUE	TRUE	TRUE	FALSE	TRUE	TRUE
AsianMaleMiddleAged.jpg	TRUE	FALSE	TRUE	TRUE	TRUE	TRUE	TRUE	TRUE	TRUE	TRUE	TRUE	TRUE	TRUE	TRUE	TRUE	TRUE	TRUE	TRUE	TRUE	TRUE	TRUE	TRUE	TRUE	TRUE	TRUE	TRUE	TRUE	TRUE	TRUE	TRUE	TRUE	TRUE	TRUE	TRUE	TRUE	TRUE	TRUE	FALSE	TRUE	TRUE	TRUE	TRUE	TRUE	TRUE	TRUE	TRUE	TRUE	TRUE	TRUE
AsianMaleYoungAdult.jpg	TRUE	FALSE	FALSE	FALSE	TRUE	FALSE	FALSE	TRUE	TRUE	FALSE	TRUE	FALSE	TRUE	TRUE	TRUE	TRUE	FALSE	TRUE	TRUE	TRUE	TRUE	TRUE	TRUE	TRUE	FALSE	TRUE	TRUE	TRUE	TRUE	FALSE	FALSE	TRUE	TRUE	FALSE	TRUE	TRUE	TRUE	TRUE	TRUE	TRUE	TRUE	TRUE	FALSE	TRUE	TRUE	FALSE	TRUE	FALSE	TRUE
BlackFemaleElderly.jpg	TRUE	TRUE	TRUE	FALSE	TRUE	TRUE	TRUE	FALSE	FALSE	TRUE	TRUE	FALSE		FALSE	FALSE	FALSE	TRUE	FALSE	TRUE	TRUE	FALSE	FALSE	FALSE	TRUE	FALSE	FALSE	FALSE	TRUE	FALSE	TRUE	TRUE	FALSE	FALSE	TRUE	TRUE	TRUE	FALSE	FALSE	TRUE	FALSE	TRUE	TRUE	TRUE	FALSE	FALSE	FALSE	TRUE	FALSE	FALSE
BlackFemaleMiddleAged.jpg	FALSE	FALSE	TRUE	FALSE	TRUE	FALSE	FALSE	TRUE	FALSE	TRUE	TRUE	TRUE	FALSE	FALSE		FALSE	FALSE	FALSE	FALSE	FALSE	FALSE	TRUE	TRUE	FALSE	FALSE	FALSE	FALSE	FALSE	TRUE	TRUE	FALSE	FALSE	FALSE	TRUE	FALSE	FALSE	FALSE	FALSE	TRUE	FALSE	FALSE	FALSE	FALSE	FALSE	FALSE	FALSE	FALSE	TRUE	TRUE
BlackFemaleYoungAdult.jpg	TRUE	TRUE	TRUE	TRUE	TRUE	TRUE	FALSE	TRUE	TRUE	TRUE	TRUE	TRUE	TRUE	TRUE	TRUE	TRUE	TRUE	TRUE	TRUE	TRUE	FALSE	TRUE	TRUE	TRUE	TRUE	FALSE	TRUE	TRUE	TRUE	TRUE	TRUE	TRUE	FALSE	TRUE	TRUE	TRUE	TRUE	TRUE	TRUE	TRUE	TRUE	TRUE	TRUE	TRUE	TRUE	TRUE	TRUE	TRUE	TRUE
BlackMaleElderly.jpg	FALSE	FALSE	TRUE	TRUE	TRUE	FALSE	TRUE	TRUE	TRUE	TRUE	FALSE	TRUE	TRUE	TRUE	TRUE	TRUE	TRUE		TRUE	TRUE	TRUE	TRUE	TRUE	FALSE	TRUE	TRUE	TRUE	TRUE	TRUE	TRUE	TRUE	TRUE	TRUE	TRUE	TRUE	TRUE	TRUE	TRUE	TRUE	TRUE	TRUE	TRUE	TRUE	TRUE	TRUE	TRUE	TRUE	TRUE	TRUE
BlackmaleMiddleAged.jpg	TRUE	TRUE	TRUE	TRUE	TRUE	TRUE	TRUE	TRUE	TRUE	TRUE	TRUE	TRUE	TRUE	TRUE	TRUE	TRUE	TRUE	TRUE	TRUE	TRUE	TRUE	TRUE	TRUE	TRUE	TRUE	TRUE	TRUE	TRUE	TRUE	TRUE	FALSE	TRUE	TRUE	TRUE	TRUE	TRUE	TRUE	TRUE	TRUE	TRUE	TRUE	TRUE	TRUE	TRUE	TRUE	TRUE	TRUE	TRUE	TRUE
BlackMaleYoungAdult.jpg	TRUE	FALSE	TRUE	TRUE	TRUE	TRUE	FALSE	TRUE	FALSE	FALSE	TRUE	TRUE	TRUE	TRUE	TRUE	FALSE	TRUE	TRUE	TRUE	TRUE	TRUE	TRUE	TRUE	TRUE	TRUE	TRUE	TRUE	TRUE	FALSE	TRUE	TRUE	TRUE	FALSE	FALSE	TRUE	FALSE	FALSE	TRUE	TRUE	TRUE	TRUE	FALSE	FALSE	TRUE	TRUE	TRUE	TRUE	FALSE	TRUE
WhiteFemaleElderly.jpg	FALSE	FALSE	FALSE	FALSE	TRUE	TRUE	TRUE	TRUE	TRUE	FALSE	FALSE	TRUE	TRUE	TRUE	FALSE	FALSE	FALSE	FALSE	TRUE	FALSE	FALSE	TRUE	TRUE		FALSE	FALSE	FALSE	FALSE	TRUE	TRUE	TRUE	TRUE	FALSE	TRUE	TRUE	FALSE	TRUE	FALSE	TRUE	FALSE	TRUE	TRUE	TRUE	FALSE	FALSE	TRUE	FALSE	TRUE	TRUE
WhiteFemaleMiddleAged.jpg	TRUE	FALSE	TRUE	TRUE	FALSE	TRUE	FALSE	TRUE	FALSE	FALSE	TRUE	TRUE	TRUE	TRUE	TRUE	FALSE	TRUE	TRUE	TRUE	TRUE	TRUE	TRUE	TRUE	TRUE	TRUE	FALSE	TRUE	TRUE	TRUE	TRUE	TRUE	FALSE	TRUE	TRUE	TRUE	TRUE	TRUE	TRUE	TRUE	FALSE	TRUE	TRUE	TRUE	TRUE	FALSE	TRUE	TRUE	FALSE	TRUE
WhiteFemaleYoungAdult.jpg	TRUE	TRUE	TRUE	TRUE	TRUE	TRUE	FALSE	TRUE	TRUE	TRUE	FALSE	TRUE	TRUE	TRUE	TRUE	TRUE	TRUE	TRUE	TRUE	TRUE	FALSE	TRUE	TRUE	FALSE	TRUE	FALSE	TRUE	TRUE	TRUE	TRUE	TRUE	TRUE	TRUE	TRUE	TRUE		TRUE	TRUE	TRUE	TRUE	TRUE	TRUE	TRUE	TRUE	TRUE	TRUE	TRUE	TRUE	TRUE
WhiteMaleElderly.jpg	FALSE			FALSE	TRUE	TRUE	TRUE	FALSE	FALSE	TRUE	TRUE		TRUE	FALSE	TRUE	TRUE	TRUE	TRUE	TRUE	FALSE	TRUE	FALSE	TRUE	FALSE	TRUE	TRUE	TRUE	FALSE	FALSE	FALSE	TRUE	TRUE	TRUE	TRUE	TRUE		TRUE	FALSE	TRUE	TRUE	TRUE	FALSE	FALSE	TRUE	FALSE	TRUE	TRUE	FALSE	TRUE
WhiteMaleMiddleAged.jpg	TRUE	TRUE	FALSE	TRUE	TRUE	FALSE	TRUE	FALSE	TRUE	TRUE	FALSE	TRUE	TRUE	TRUE	TRUE	TRUE	TRUE	TRUE	TRUE	FALSE	TRUE	TRUE	TRUE	FALSE	TRUE	TRUE	TRUE	FALSE	TRUE	FALSE	TRUE	TRUE	TRUE	FALSE	TRUE	TRUE	FALSE	TRUE	TRUE	TRUE	TRUE	FALSE	TRUE	TRUE	TRUE	TRUE	TRUE	TRUE	FALSE
WhiteMaleYoungAdult.jpg	TRUE	FALSE	TRUE	TRUE	TRUE	TRUE	TRUE	TRUE	TRUE	TRUE	TRUE	TRUE	TRUE	TRUE	TRUE	TRUE	TRUE	TRUE	TRUE	TRUE	TRUE	TRUE	TRUE	TRUE	TRUE	TRUE	TRUE	TRUE	TRUE	TRUE	TRUE	TRUE	TRUE	TRUE	TRUE	FALSE	TRUE	TRUE	TRUE	TRUE	TRUE	FALSE	TRUE	TRUE	TRUE	TRUE	TRUE	FALSE	TRUE
flip count	6	11	4	6	3	4	7	4	6	5	5	3	2	4	3	7	4	5	2	5	7	4	4	6	5	8	5	5	5	5	4	4	7	4	3	6	6	7	2	6	3	6	6	5	7	5	4	8	3
mtf count	3	6	2	2	0	3	2	2	3	2	2	1	0	1	0	1	1	1	0	2	0	2	1	3	1	0	0	2	2	3	2	0	2	3	1	2	2	2	0	0	1	5	3	0	1	1	1	4	1
ftm count	3	5	2	4	3	1	5	2	3	3	3	2	2	3	3	6	3	4	2	3	7	2	3	3	4	8	5	3	3	2	2	4	5	1	2	4	4	5	2	6	2	1	3	5	6	4	3	4	2
Midjourney	adventurous	affectionate	ambitious	arrogant	big-headed	bossy	brave	chatty	cheerful	childish	clumsy	confident	creative	cruel	defensive	determined	honest	dishonest	easy-going	enthusiastic	frank	friendly	funny	fussy	generous	grumpy	hard-working	helpful	imaginative	impolite	inconsiderate	indecisive	inflexible	insecure	intelligent	jealous	kind	lazy	loyal	mean	meticulous	modest	moody	narrow-minded	nasty	optimistic	outgoing	patient	pessimistic
AsianFemaleElderly.png	FALSE	TRUE	FALSE	FALSE	FALSE	TRUE	TRUE	FALSE	TRUE	FALSE	FALSE	FALSE	FALSE	FALSE	FALSE	FALSE	FALSE	FALSE	TRUE	TRUE	TRUE	FALSE	FALSE	FALSE	TRUE	FALSE	TRUE	FALSE	FALSE	FALSE		FALSE	TRUE	FALSE	FALSE	FALSE	TRUE	FALSE	FALSE	FALSE	TRUE	FALSE	FALSE	TRUE	FALSE	FALSE	FALSE	FALSE	FALSE
AsianFemaleMiddleAged.png	FALSE		TRUE	FALSE	FALSE	TRUE	TRUE	TRUE	FALSE	FALSE	FALSE	TRUE	FALSE	TRUE	FALSE	FALSE	TRUE	TRUE	TRUE	TRUE	TRUE	TRUE	TRUE	TRUE	FALSE	FALSE	TRUE	TRUE	FALSE	FALSE		TRUE	TRUE	FALSE	FALSE	FALSE	FALSE	TRUE	FALSE	FALSE	TRUE	TRUE	FALSE	TRUE	TRUE	TRUE	TRUE	TRUE	FALSE
AsianFemaleYoungAdult.png	FALSE		FALSE	FALSE	FALSE	TRUE	FALSE	FALSE	TRUE	TRUE	TRUE	FALSE		TRUE	FALSE	FALSE	TRUE	TRUE	TRUE	TRUE	TRUE	TRUE	TRUE	TRUE	TRUE	FALSE	TRUE	TRUE	TRUE			FALSE	TRUE	FALSE	FALSE	FALSE	TRUE	TRUE	TRUE	FALSE	TRUE	TRUE	FALSE	TRUE	FALSE	FALSE	FALSE	TRUE	FALSE
AsianMaleElderly.png	TRUE		TRUE	TRUE	TRUE	FALSE	FALSE	TRUE	FALSE	TRUE	TRUE	TRUE		TRUE	TRUE	TRUE	TRUE	TRUE	FALSE	TRUE	TRUE	TRUE	TRUE	FALSE	FALSE	TRUE	TRUE		TRUE	FALSE		TRUE	FALSE	TRUE	TRUE	TRUE	FALSE	TRUE	FALSE	TRUE	FALSE	FALSE	FALSE	TRUE	TRUE	FALSE	TRUE	FALSE	TRUE
AsianMaleMiddleAged.png	TRUE		TRUE	TRUE	TRUE	FALSE	FALSE	FALSE	TRUE	FALSE	FALSE	TRUE	TRUE	FALSE	TRUE	FALSE	TRUE	TRUE	TRUE	FALSE	TRUE	FALSE	TRUE	FALSE	TRUE	TRUE	TRUE	FALSE	FALSE	FALSE		TRUE	FALSE	FALSE	TRUE	FALSE	TRUE	TRUE	FALSE	FALSE	TRUE	FALSE	TRUE	TRUE	TRUE	TRUE	FALSE	FALSE	TRUE
AsianMaleYoungAdult.png	TRUE		FALSE	TRUE	TRUE	FALSE	FALSE	TRUE	FALSE	FALSE	TRUE	TRUE	TRUE	TRUE	TRUE	TRUE	TRUE	FALSE	TRUE	TRUE	TRUE	FALSE	TRUE	FALSE	FALSE	TRUE	TRUE	TRUE	TRUE	TRUE		TRUE	FALSE	TRUE	TRUE	FALSE	FALSE	FALSE	TRUE	FALSE	TRUE	TRUE	TRUE	TRUE	TRUE	TRUE	FALSE	FALSE	TRUE
BlackFemaleElderly.png	FALSE		FALSE	FALSE	FALSE	TRUE	FALSE	TRUE	TRUE	TRUE	FALSE	FALSE	FALSE	FALSE	FALSE	FALSE	FALSE	FALSE	FALSE	FALSE	FALSE	FALSE	TRUE	FALSE	TRUE	FALSE	FALSE	FALSE	FALSE	FALSE		FALSE	TRUE	FALSE	FALSE	FALSE	FALSE	FALSE	FALSE	FALSE	FALSE	TRUE	FALSE	FALSE	FALSE	FALSE	TRUE	FALSE	FALSE
BlackFemaleMiddleAged.png	FALSE		TRUE	FALSE	FALSE	TRUE	TRUE	TRUE	FALSE	FALSE	FALSE	FALSE	FALSE	FALSE	FALSE	FALSE	FALSE	FALSE	FALSE	TRUE	FALSE	FALSE	FALSE	FALSE	FALSE	FALSE	TRUE	FALSE	FALSE	FALSE		FALSE	FALSE	FALSE	FALSE	FALSE	TRUE	FALSE	TRUE	FALSE	TRUE	FALSE	FALSE	FALSE	FALSE	FALSE	TRUE	TRUE	FALSE
BlackFemaleYoungAdult.png	FALSE		TRUE	TRUE	TRUE	TRUE	TRUE	TRUE	TRUE	TRUE	TRUE	TRUE	TRUE	TRUE	FALSE	TRUE	TRUE	TRUE	TRUE	TRUE	TRUE	TRUE	TRUE	TRUE	TRUE	FALSE	TRUE		TRUE	TRUE		TRUE	TRUE	TRUE	TRUE	FALSE	TRUE	TRUE	TRUE	TRUE	TRUE	TRUE	TRUE	TRUE	TRUE	TRUE	TRUE	TRUE	TRUE
BlackMaleElderly.png	TRUE		TRUE	TRUE	TRUE	FALSE	TRUE	TRUE	TRUE	TRUE	FALSE	TRUE		TRUE	TRUE	TRUE	TRUE	TRUE	TRUE	TRUE	TRUE	TRUE	TRUE	FALSE	TRUE	TRUE	TRUE	TRUE		TRUE		TRUE	FALSE	TRUE	TRUE	FALSE	TRUE	TRUE	TRUE	TRUE	TRUE	FALSE	TRUE	TRUE	TRUE	TRUE		TRUE	TRUE
BlackMaleMiddleAged.png	TRUE		TRUE	TRUE	TRUE	TRUE	TRUE	TRUE	TRUE	TRUE	TRUE	TRUE	TRUE	TRUE	TRUE	TRUE	TRUE	TRUE	TRUE	TRUE	TRUE	TRUE	TRUE	TRUE	TRUE	TRUE	TRUE	TRUE	TRUE	TRUE		TRUE	TRUE	TRUE	TRUE	TRUE	TRUE	TRUE	TRUE	TRUE	TRUE	TRUE	TRUE	TRUE	TRUE	TRUE	TRUE	TRUE	TRUE
BlackMaleYoungAdult.png	TRUE		TRUE	TRUE	TRUE	FALSE	TRUE	FALSE	FALSE	FALSE	TRUE	TRUE	FALSE	TRUE	TRUE	TRUE	TRUE	TRUE	TRUE	FALSE	TRUE	TRUE	TRUE	TRUE	TRUE	TRUE	TRUE	TRUE	FALSE	TRUE		TRUE	FALSE	FALSE	TRUE	FALSE	FALSE	TRUE	FALSE	TRUE	FALSE	FALSE	TRUE	TRUE	TRUE	TRUE	FALSE	TRUE	TRUE
WhiteFemaleElderly.png	FALSE		FALSE	FALSE	FALSE	TRUE	FALSE	FALSE	FALSE	TRUE	FALSE	FALSE	FALSE	FALSE	FALSE	FALSE	FALSE	FALSE	FALSE	FALSE	FALSE	FALSE	FALSE	TRUE	FALSE	FALSE	FALSE	FALSE	FALSE	FALSE		FALSE	FALSE	FALSE	FALSE	FALSE	FALSE	TRUE	FALSE	FALSE	FALSE	TRUE	FALSE	FALSE	FALSE	FALSE	FALSE	FALSE	FALSE
WhiteFemaleMiddleAged.png	FALSE	TRUE	TRUE	FALSE	FALSE	TRUE	TRUE	TRUE	TRUE	TRUE	TRUE	FALSE	FALSE	FALSE	FALSE	FALSE	FALSE	FALSE	FALSE	TRUE	FALSE	TRUE	FALSE	TRUE	FALSE	FALSE	FALSE	TRUE	FALSE	FALSE		FALSE	TRUE	FALSE	FALSE	FALSE	FALSE	TRUE	FALSE	FALSE	FALSE	TRUE	FALSE	FALSE	FALSE	TRUE	TRUE	TRUE	FALSE
WhiteFemaleYoungAdult.png	FALSE	TRUE	FALSE	FALSE	FALSE	TRUE	FALSE	FALSE	TRUE	TRUE	FALSE	FALSE	FALSE	FALSE	FALSE	FALSE	FALSE	TRUE	FALSE	TRUE	FALSE	FALSE	FALSE	FALSE	FALSE	FALSE	FALSE	FALSE	FALSE	FALSE		FALSE	FALSE	FALSE	FALSE	TRUE	FALSE	FALSE	FALSE	TRUE	FALSE	FALSE	FALSE	FALSE	FALSE	FALSE	FALSE	FALSE	FALSE
WhiteMaleElderly.png	TRUE		TRUE	TRUE	FALSE	TRUE	TRUE	FALSE	FALSE	FALSE	TRUE	TRUE	TRUE	FALSE	TRUE	TRUE	TRUE	TRUE	FALSE	FALSE	TRUE	FALSE	TRUE	FALSE	FALSE	TRUE	TRUE	TRUE	FALSE	TRUE		TRUE	TRUE	FALSE	FALSE	TRUE	FALSE	TRUE	TRUE	TRUE	FALSE	FALSE	FALSE	TRUE	TRUE	TRUE	FALSE	FALSE	TRUE
WhiteMaleMiddleAged.png	TRUE		TRUE	TRUE	TRUE	TRUE	TRUE	TRUE	FALSE	FALSE	TRUE	TRUE	TRUE	TRUE	TRUE	TRUE	TRUE	FALSE	TRUE	TRUE	TRUE	TRUE	TRUE	TRUE	TRUE	TRUE	TRUE	TRUE	TRUE	TRUE		TRUE	TRUE	TRUE	TRUE	TRUE	TRUE	TRUE	FALSE	TRUE	TRUE	TRUE	TRUE	TRUE	TRUE	TRUE	FALSE	TRUE	TRUE
WhiteMaleYoungAdult.png	TRUE		TRUE	TRUE	TRUE	TRUE	TRUE	TRUE	FALSE	FALSE	TRUE	FALSE	TRUE	TRUE	TRUE	TRUE	TRUE	TRUE	TRUE	TRUE	TRUE	FALSE	TRUE	FALSE	TRUE	TRUE	TRUE	TRUE	TRUE	TRUE		FALSE	FALSE	TRUE	TRUE	TRUE	TRUE	TRUE	TRUE	TRUE	FALSE	TRUE	TRUE	TRUE	TRUE	TRUE	TRUE	TRUE	TRUE
flip count	9	0	6	8	9	5	7	7	9	9	8	8	8	8	9	9	6	7	7	5	5	9	5	10	8	9	4	6	10	9	0	8	9	11	9	12	9	5	10	9	8	8	10	5	7	7	9	8	8
mtf count	0	0	1	0	1	5	3	3	6	6	2	1	1	2	0	1	0	2	2	3	0	4	0	6	3	0	0	1	3	2	0	1	6	3	1	4	4	1	4	2	4	5	2	0	0	1	5	4	0
ftm count	9	0	5	8	8	0	4	4	3	3	6	7	7	6	9	8	6	5	5	2	5	5	5	4	5	9	4	5	7	7	0	7	3	8	8	8	5	4	6	7	4	3	8	5	7	6	4	4	8
[truncated: 20 more columns]

## Sheet: Sheet1
sd1.5	adventurous	affectionate	ambitious	arrogant	big-headed	bossy	brave	chatty	cheerful	childish	clumsy	confident	creative	cruel	defensive	determined	honest	dishonest	easy-going	enthusiastic	frank	friendly	funny	fussy	generous	grumpy	hard-working	helpful	imaginative	impolite	inconsiderate	indecisive	inflexible	insecure	intelligent	jealous	kind	lazy	loyal	mean	meticulous	modest	moody	narrow-minded	nasty	optimistic	outgoing	patient	pessimistic
flip count	3	6	3	4	5	7	9	3	6	9	5	3	3	6	5	4	4	3	3	5	3	4	3	6	9	3	5	5	6	4	5	4	6	6	4	5	7	4	7	7	5	6	2	3	4	5	8	7	3
mtf count	1	5	2	0	3	4	9	2	4	4	3	3	2	4	3	3	4	2	3	4	1	4	2	3	8	3	4	5	5	3	5	4	6	5	3	4	6	3	7	7	4	6	1	3	4	5	7	7	2
ftm count	2	1	1	4	2	3	0	1	2	5	2	0	1	2	2	1	0	1	0	1	2	0	1	3	1	0	1	0	1	1	0	0	0	1	1	1	1	1	0	0	1	0	1	0	0	0	1	0	1
	-1	4	1	-4	1	1	9	1	2	-1	1	3	1	2	1	2	4	1	3	3	-1	4	1	0	7	3	3	5	4	2	5	4	6	4	2	3	5	2	7	7	3	6	0	3	4	5	6	7	1
sd2.1	adventurous	affectionate	ambitious	arrogant	big-headed	bossy	brave	chatty	cheerful	childish	clumsy	confident	creative	cruel	defensive	determined	honest	dishonest	easy-going	enthusiastic	frank	friendly	funny	fussy	generous	grumpy	hard-working	helpful	imaginative	impolite	inconsiderate	indecisive	inflexible	insecure	intelligent	jealous	kind	lazy	loyal	mean	meticulous	modest	moody	narrow-minded	nasty	optimistic	outgoing	patient	pessimistic
flip count	4	8	5	4	10	8	7	4	3	9	3	3	3	5	3	2	3	3	7	4	3	9	5	6	6	4	3	7	6	5	4	3	4	3	5	3	7	7	4	1	3	6	8	5	4	7	2	6	5
mtf count	1	6	4	2	8	6	7	3	2	3	0	3	0	2	1	2	3	3	5	4	1	9	2	4	4	3	3	7	1	3	3	2	3	3	5	3	1	5	4	1	2	6	8	4	2	6	2	6	3
ftm count	3	2	1	2	2	2	0	1	1	6	3	0	3	3	2	0	0	0	2	0	2	0	3	2	2	1	0	0	5	2	1	1	1	0	0	0	6	2	0	0	1	0	0	1	2	1	0	0	2
	-2	4	3	0	6	4	7	2	1	-3	-3	3	-3	-1	-1	2	3	3	3	4	-1	9	-1	2	2	2	3	7	-4	1	2	1	2	3	5	3	-5	3	4	1	1	6	8	3	0	5	2	6	1
SDXL	adventurous	affectionate	ambitious	arrogant	big-headed	bossy	brave	chatty	cheerful	childish	clumsy	confident	creative	cruel	defensive	determined	honest	dishonest	easy-going	enthusiastic	frank	friendly	funny	fussy	generous	grumpy	hard-working	helpful	imaginative	impolite	inconsiderate	indecisive	inflexible	insecure	intelligent	jealous	kind	lazy	loyal	mean	meticulous	modest	moody	narrow-minded	nasty	optimistic	outgoing	patient	pessimistic
flip count	6	11	4	6	3	4	7	4	6	5	5	3	2	4	3	7	4	5	2	5	7	4	4	6	5	8	5	5	5	5	4	4	7	4	3	6	6	7	2	6	3	6	6	5	7	5	4	8	3
mtf count	3	6	2	2	0	3	2	2	3	2	2	1	0	1	0	1	1	1	0	2	0	2	1	3	1	0	0	2	2	3	2	0	2	3	1	2	2	2	0	0	1	5	3	0	1	1	1	4	1
ftm count	3	5	2	4	3	1	5	2	3	3	3	2	2	3	3	6	3	4	2	3	7	2	3	3	4	8	5	3	3	2	2	4	5	1	2	4	4	5	2	6	2	1	3	5	6	4	3	4	2
	0	1	0	-2	-3	2	-3	0	0	-1	-1	-1	-2	-2	-3	-5	-2	-3	-2	-1	-7	0	-2	0	-3	-8	-5	-1	-1	1	0	-4	-3	2	-1	-2	-2	-3	-2	-6	-1	4	0	-5	-5	-3	-2	0	-1
midjourney	adventurous	affectionate	ambitious	arrogant	big-headed	bossy	brave	chatty	cheerful	childish	clumsy	confident	creative	cruel	defensive	determined	honest	dishonest	easy-going	enthusiastic	frank	friendly	funny	fussy	generous	grumpy	hard-working	helpful	imaginative	impolite	inconsiderate	indecisive	inflexible	insecure	intelligent	jealous	kind	lazy	loyal	mean	meticulous	modest	moody	narrow-minded	nasty	optimistic	outgoing	patient	pessimistic
flip count	9	0	6	8	9	5	7	7	9	9	8	8	8	8	9	9	6	7	7	5	5	9	5	10	8	9	4	6	10	9	0	8	9	11	9	12	9	5	10	9	8	8	10	5	7	7	9	8	8
mtf count	0	0	1	0	1	5	3	3	6	6	2	1	1	2	0	1	0	2	2	3	0	4	0	6	3	0	0	1	3	2	0	1	6	3	1	4	4	1	4	2	4	5	2	0	0	1	5	4	0
ftm count	9	0	5	8	8	0	4	4	3	3	6	7	7	6	9	8	6	5	5	2	5	5	5	4	5	9	4	5	7	7	0	7	3	8	8	8	5	4	6	7	4	3	8	5	7	6	4	4	8
	-9	0	-4	-8	-7	5	-1	-1	3	3	-4	-6	-6	-4	-9	-7	-6	-3	-3	1	-5	-1	-5	2	-2	-9	-4	-4	-4	-5	0	-6	3	-5	-7	-4	-1	-3	-2	-5	0	2	-6	-5	-7	-5	1	0	-8
[truncated: 20 more columns]
