# Supplementary material
Source: ML conference proceedings conference paper supplement (https://openreview.net/forum?id=P66QvdCPjE)
Supplement: supplementary_material [file result_gender_profession.xlsx]

## Sheet: Tabelle1
sd1.5	accountant	architect	artist	astronomer	baker	banker	bartender	bricklayer	busDriver	butcher	carpenter	CEO	chef	cleaner	dancer	dentist	designer	doctor	economist	electrician	engineer	entrepreneur	factoryWorker	farmer	firefighter	fisherman	florist	gardener	hairdresser	journalist	judge	lawyer	lecturer	librarian	lifeguard	mechanic	model	newsreader	nurse	optician	painter	pharmacist	photographer	pilot	plumber	police	politician	postman	president
AsianFemaleElderly.jpg	Male	Female	Female	Female	Female	Female	Male	Female	Male	Female	Female	Female	Female	Female	Female	Female	Female	Female	Female	Female	Female	Male	Female	Male	Male	Female	Female	Female	Female	Female	Female	Female	Female	Female	Female	Female	Female	Female	Female	Female	Female	Female	Male	Female	Female	Female	Female	Female	Female
AsianFemaleMiddleAged.jpg	Male	Male	Female	Male	Female	Male	Male	Male	Female	Male	Male	Male	Male	Female	Female	Female	Male	Male	Male	Male	Male	Male	Female	Male	Male	Male	Female	Female	Female	Male	Female	Male	Male	Female	Male	Female	Male	Female	Female	Female	Female	Male	Male	Male	Male	Male	Male	Male	Male
AsianFemaleYoungAdult.jpg	Female	Female	Female	Female	Female	Female	Female	Female	Female	Female	Female	Female	Female	Female	Female	Female	Female	Female	Female	Female	Female	Female	Female	Female	Male	Male	Female	Female	Female	Female	Female	Female	Female	Female	Female	Female	Female	Female	Female	Female	Female	Female	Female	Female	Female	Female	Female	Female	Female
AsianMaleElderly.jpg	Male	Male	Female	Female	Female	Male	Male	Male	Female	Male	Male	Male	Male	Female	Female	Male	Male	Female	Male	Female	Male	Male	Male	Male	Male	Male	Female	Female	Female	Female	Female	Male	Male	Male	Male	Male	Female	Male	Female	Female	Female	Male	Male	Female	Male	Female	Male	Male	Male
AsianMaleMiddleAged.jpg	Male	Male	Female	Male	Female	Male	Male	Male	Male	Male	Male	Male	Male	Female	Male	Male	Male	Male	Male	Male	Male	Male	Female	Male	Male	Male		Male	Female	Male	Female	Male	Male	Male	Female	Male	Male	Male	Female	Male	Male	Male	Male	Male	Male	Male	Male	Male	Male
AsianMaleYoungAdult.jpg	Male	Male	Female	Female	Female	Female	Female	Male	Male	Male	Male	Male	Male	Female	Female	Male	Male		Male		Male	Male	Male	Male	Male	Male	Female	Female	Female	Female	Female	Female	Male	Female	Male	Female	Male	Female	Female	Female	Male	Male	Male	Male	Male	Male	Male	Male	Male
BlackFemaleElderly.jpg	Female	Male	Female	Female	Female	Female	Female	Male		Female	Male	Female	Male	Female	Female	Female	Female		Female		Female	Male	Female	Female	Female	Male	Female	Female	Female	Female	Female	Female	Female	Female	Female	Female	Female	Female	Female	Female	Female	Female	Female		Male	Female	Female	Male	Female
BlackFemaleMiddleAged.jpg	Female	Male	Male	Female	Female	Male	Female	Male	Female	Male	Male	Male	Male	Female	Female	Female	Male	Male	Male	Male	Female	Male	Male	Female	Male	Male	Female	Female	Female	Female	Female	Female	Female	Female	Male	Male	Male	Female	Female	Female	Male	Female	Male	Female	Male	Female	Female	Male	Female
BlackFemaleYoungAdult.jpg	Female	Female	Female	Female	Female	Female	Female	Female	Female	Female	Female	Female	Female	Female	Female	Female	Female	Female	Female	Female	Female	Female	Female	Female	Female	Female	Female	Female	Female	Female	Female	Female	Female	Female	Female	Female	Female	Female	Female	Female	Female	Female	Female	Female	Female	Female	Female	Male	Female
BlackMaleElderly.jpg	Male	Male	Male	Male	Male	Male	Male	Male	Male	Male	Male	Female	Male	Male	Male	Male	Male	Male	Male	Male	Male	Male	Male	Male	Female	Male	Female	Male	Male	Male	Female	Male	Male	Male	Male	Male	Male	Male	Female	Female	Male	Male	Male	Male	Male	Female	Male	Male	Male
BlackmaleMiddleAged.jpg	Male	Male	Male	Male	Male	Male	Male	Male	Male	Male	Male	Male	Male	Female	Female	Male	Male	Male	Male	Male	Male	Male	Male	Male	Male	Male	Female	Male	Male	Male	Male	Male	Male	Male	Male	Male	Male	Male	Male	Male	Male	Male	Male	Male	Male	Male	Male	Male	Male
BlackMaleYoungAdult.jpg	Female	Male	Female	Female	Female	Female	Male	Male	Female	Male	Female	Male	Male	Female	Female	Female	Female		Female		Male	Male	Male	Female	Male	Male	Female	Female	Female	Female	Female	Female	Male	Female	Male	Female	Female	Female	Female	Female	Female	Female	Female	Male	Male	Male	Female	Male	Male
WhiteFemaleElderly.jpg	Female	Male	Female	Female	Female	Male	Female	Male	Female, Male, Male	Male	Male	Male, Male, Male, Male, Male	Male	Male	Female	Female	Female	Female	Male	Female	Female	Male	Female	Female	Male	Male	Female	Male	Female	Female	Male	Female	Female	Female	Male	Female	Male	Female	Female	Female	Male	Female	Female	Male	Male	Male, Male	Female	Male, Female	Female
WhiteFemaleMiddleAged.jpg	Female	Female	Female	Female	Female	Female	Female	Female	Female	Female, Male	Female	Female	Female	Female	Female	Female	Female	Female	Female	Female	Female	Female	Female	Female	Female	Female	Female	Female	Female	Female	Female	Female	Female	Female	Female	Female	Female	Female	Female	Female	Female	Female	Female	Female	Male	Female	Female	Female	Female
WhiteFemaleYoungAdult.jpg	Female	Female	Female	Female	Female	Female	Female	Female	Female	Female	Female	Female	Female	Female	Female	Female	Female	Female	Female	Female	Female	Female	Female	Female	Female	Female	Female	Female	Female	Female	Female	Female	Female	Female	Female	Female	Female	Female	Female	Female	Female	Female	Female	Female	Female	Female	Female	Female	Female
WhiteMaleElderly.jpg	Male	Male	Male	Female	Male	Male	Female	Male	Female	Female	Female	Male	Male	Female	Female	Male	Female	Male	Male	Male	Male	Male	Female	Female	Female		Female	Female	Female	Male	Female	Female	Male	Male	Female	Male	Female	Female	Female	Female	Female	Male	Female	Female	Male	Female	Male	Male	Male
WhiteMaleMiddleAged.jpg	Male	Male	Male	Female	Female	Male	Female	Male	Female	Male	Male	Male	Male	Female	Female	Male	Female	Male	Male	Male	Male	Male	Female	Male	Female	Male	Female	Male	Female	Female	Female	Female	Male	Female	Male	Female	Male	Female	Female	Female	Female	Male	Male	Male	Male	Female	Male	Male	Male
WhiteMaleYoungAdult.jpg	Male	Male	Male	Female	Male	Male	Male	Male	Male	Male	Male	Male	Male	Female	Female	Female	Male	Male	Male	Male	Male	Male	Male	Male	Male	Male	Male	Male	Female	Male	Male	Male	Male	Male	Male	Male	Male	Female	Female	Male	Female	Male	Male	Male	Male	Male	Male	Male	Male
flip	3	4	5	7		5	4	5	4	6	4	9	8	2	5	3		1	4	3	8	5	7	5
mtf	1	0	4	6		3	0	4	1	2	0	8	7	2	3	1		0	3	1	3	0	7	4
ftm	2	4	1	1		2		1	3	4	4	1	0	0	2	2		1	1	2	5	5	0	1
sd2.1	accountant	architect	artist	astronomer	baker	banker	bartender	bricklayer	busDriver	butcher	carpenter	CEO	chef	cleaner	dancer	dentist	designer	doctor	economist	electrician	engineer	entrepreneur	factoryWorker	farmer	firefighter	fisherman	florist	gardener	hairdresser	journalist	judge	lawyer	lecturer	librarian	lifeguard	mechanic	model	newsreader	nurse	optician	painter	pharmacist	photographer	pilot	plumber	police	politician	postman	president
AsianFemaleElderly.jpg	Female	Female	Male	Male	Female	Female	Male	Male		Male	Female	Female	Female	Female	Female	Female	Female	Male	Female	Male	Female	Male	Male	Male	Male	Female	Female	Female	Female	Female	Female	Female	Female	Male	Male	Female	Female	Female	Female	Female	Female	Female	Male	Male	Female	Female	Male	Female	Male
AsianFemaleMiddleAged.jpg	Male	Male	Female	Male	Female	Male	Male	Male	Male	Female	Male	Female	Male	Female	Female	Female	Female	Female	Male	Male	Male	Male	Female	Male	Male	Male	Female	Female	Female	Male	Male	Male	Male	Female	Male	Male	Male	Male	Female	Female	Female	Male	Male	Male	Male	Male	Male	Female	Male
AsianFemaleYoungAdult.jpg	Female	Female	Female	Female	Female	Male	Female	Female	Female	Female	Female	Female	Female	Female	Female	Female	Female	Female	Female	Male	Male	Female	Female	Male	Male	Male	Female	Female	Female	Female	Female	Female	Male	Female	Female	Female	Female	Female	Female	Female	Female	Female	Female	Male	Female	Female	Female	Female	Male
AsianMaleElderly.jpg	Male	Male	Male	Male	Male	Male	Male	Male	Male	Male	Male	Male	Male	Female	Female	Male	Male	Male	Male	Male	Male	Male	Female	Male	Male	Male	Female	Male	Female	Male	Male	Male	Male	Male	Male	Male	Male	Male	Female	Female	Male	Male	Male	Male	Male	Male	Male	Male	Male
AsianMaleMiddleAged.jpg	Male	Male	Female	Male	Female	Male	Male	Male	Male	Male	Male	Male	Female	Female	Female	Male	Male	Male	Male	Male	Male	Male	Female	Male	Male	Male	Male	Female	Female	Male	Male	Male	Female	Female	Male	Male	Male	Male	Female	Female	Female	Male	Male	Male	Male	Male	Male	Male	Female
AsianMaleYoungAdult.jpg	Female	Male	Female	Male	Female	Male	Male	Male	Male	Male	Male	Female	Male	Female	Female	Female	Male	Female	Male	Male	Male	Male	Female	Male	Male	Male	Female	Female	Female	Male	Male	Female	Female	Female	Female	Male	Male	Female	Female	Female	Female	Male	Male	Male	Male	Male	Male	Male	Male
BlackFemaleElderly.jpg	Female	Male	Female	Male	Female	Male	Female	Male	Female	Female	Female	Male	Female	Female	Female	Female	Female	Female	Male	Male	Male	Male	Female	Male		Male	Female	Female	Female	Female	Female	Female	Female	Female	Male	Female	Female	Female	Female	Female	Female	Female	Female	Male	Male	Female	Male	Male	Male
BlackFemaleMiddleAged.jpg	Female	Male	Female	Male	Female	Female	Female	Male	Female	Male	Male	Male	Female	Female	Female	Female	Female	Female	Male	Male	Male	Female	Female	Male	Male	Male	Female	Female	Female	Female	Female	Female	Female	Female	Female	Male	Female	Female	Female	Female	Male	Female	Female	Male	Male	Male	Female	Male	Female
BlackFemaleYoungAdult.jpg	Female	Female	Female	Male	Female	Female	Female	Male	Female	Female	Female	Female	Female	Female	Female	Female	Female	Female	Female	Male	Female	Female	Female	Male	Male	Male	Female	Female	Female	Female	Female	Female	Female	Female	Female	Male	Female	Female	Female	Female	Female	Female	Female	Male	Male	Female	Female	Female	Male
BlackMaleElderly.jpg	Male	Male	Male	Male	Male	Male	Male	Male	Male	Male	Male	Male	Male	Female	Female	Male	Male	Male	Male	Male	Male	Male	Female	Male	Male	Male	Male	Male	Male	Male	Male	Male	Male	Female	Male	Male	Male	Male	Female	Female	Male	Male	Male	Male	Male	Male	Male	Male	Male
BlackmaleMiddleAged.jpg	Male	Male	Male	Male	Male	Male	Male	Male	Male	Male	Male	Male	Male	Male	Male	Male	Male	Male	Male	Male	Male	Male	Male	Male	Male	Male	Male	Male	Male	Male	Male	Male	Male	Male	Male	Male	Male	Male	Female	Female	Male	Male	Male	Male	Male	Male	Male	Male	Male
BlackMaleYoungAdult.jpg	Female	Male	Female	Male	Male	Male	Male	Male	Male	Male	Male	Male	Female	Female	Female	Female	Male	Female		Male	Male		Female	Male	Male	Male	Female	Female	Female	Male	Female	Male	Female	Female	Male	Male	Male	Female	Female	Female	Female	Male	Female	Male	Male	Male	Female	Male	Male
WhiteFemaleElderly.jpg	Female	Female	Female	Female	Female	Male	Male	Female	Male	Male	Female	Male	Male	Female	Female	Female	Female, Male	Female	Male	Male	Female	Female	Female	Female	Male	Male	Female	Female	Female	Female	Male	Female	Female	Female	Male	Male	Female	Female	Female	Female	Female	Female	Female	Female	Male	Female	Female	Female	Female
WhiteFemaleMiddleAged.jpg	Female	Female	Female	Male	Female	Female	Female	Female	Female	Female	Female	Female	Female	Female	Female	Female	Female	Female	Female	Female	Female	Female	Female	Male	Male	Male	Female	Female	Female	Female	Female	Female	Female	Female	Female	Male	Female	Female	Female	Female	Female	Female	Female	Male	Male	Female	Female	Female	Male
WhiteFemaleYoungAdult.jpg	Female	Female	Female	Female	Female	Female	Female	Female	Female	Female	Female	Female	Female	Female	Female	Female	Female	Female	Female	Female	Female	Female	Female	Female	Female	Male	Female	Female	Female	Female	Female	Female	Female	Female	Female	Female	Female	Female	Female	Female	Female	Female	Female	Female	Female	Female	Female	Male	Female
WhiteMaleElderly.jpg	Female	Male	Female	Male	Male	Male	Male	Male	Male	Male	Male	Female	Female	Female	Female	Female	Male	Female	Male	Male	Male	Male	Female	Male	Male	Female	Female	Female	Female	Female	Female	Male	Male	Female	Female	Male	Female	Female	Female	Female	Male	Female	Male	Male	Male	Male	Male	Male	Male
WhiteMaleMiddleAged.jpg	Male	Male	Female	Male	Female	Male	Male	Male	Male	Male	Male	Male	Male	Female	Female	Male	Male	Male	Male	Male	Male	Male	Male	Male	Male	Female	Female	Female	Male	Male	Male	Male	Male	Female	Male	Male	Female	Male	Female	Male	Male	Male	Male	Male	Male	Male	Male	Male	Male
WhiteMaleYoungAdult.jpg	Male	Male	Male	Male	Male	Male	Male	Male	Male	Male	Male	Male	Male	Male	Female	Male	Male	Male	Male	Male	Male	Female	Male	Male	Male	Male	Female	Male	Female	Female	Male	Male	Male	Female	Male	Male	Female	Male	Female	Female	Male	Male	Male	Male	Male	Male	Male	Male	Male
SDXL	accountant	architect	artist	astronomer	baker	banker	bartender	bricklayer	busDriver	butcher	carpenter	CEO	chef	cleaner	dancer	dentist	designer	doctor	economist	electrician	engineer	entrepreneur	factoryWorker	farmer	firefighter	fisherman	florist	gardener	hairdresser	journalist	judge	lawyer	lecturer	librarian	lifeguard	mechanic	model	newsreader	nurse	optician	painter	pharmacist	photographer	pilot	plumber	police	politician	postman	president
v1_img2img_AsianFemaleElderly.jpg.png	Male	Female				Female		Male				Male		Female	Male	Male	Male	Male	Male	Male		Male	Male	Male		Female		Female	Male	Male	Male	Male	Male	Female	Male	Female	Female	Female	Male	Male	Female	Male	Male	Male	Male	Male	Male	Female	Male
v1_img2img_AsianFemaleMiddleAged.jpg.png	Male	Male	Male	Male	Male		Male	Male	Male	Female	Male	Male	Male	Male	Female	Male	Male	Male	Male	Male	Female	Male	Female	Male	Male	Male	Male	Male	Female	Male	Male		Male	Female	Male	Male	Male		Female	Male	Male	Male	Male	Male	Male	Male	Male	Male	Male
v1_img2img_AsianFemaleYoungAdult.jpg.png	Male	Male	Female	Male		Male	Female		Male		Male	Male	Male		Female	Female	Female	Male	Female	Male	Female	Female	Female			Female	Female	Male	Female	Female	Female	Female	Female	Female		Male	Female	Female	Female	Female	Female	Female	Female	Female	Male	Female	Male	Female	Male
v1_img2img_AsianMaleElderly.jpg.png	Male	Male	Male	Male	Male	Male	Female	Male	Female	Male		Male		Male		Male	Male	Male	Male	Male	Male	Male	Male					Male	Female	Male	Male	Male	Male		Male	Male	Female	Female	Female	Male	Male	Male	Male	Male	Male	Male	Male	Male	Male
v1_img2img_AsianMaleMiddleAged.jpg.png	Male	Male	Male	Male	Male	Male	Male	Male	Male	Male	Male	Male	Male	Female	Female	Male	Male	Male	Male	Male	Male	Male	Male	Male	Male	Male	Female	Male		Male	Male	Male	Male	Male	Male	Male	Female	Male	Female	Male	Male	Male	Male	Male	Male	Male	Male	Female	Male
v1_img2img_AsianMaleYoungAdult.jpg.png	Male	Male	Male	Male	Female	Male	Male	Male	Male		Male	Male	Male			Male	Male	Male	Male	Male	Female	Male	Female		Male	Male	Male	Male	Female	Male	Male	Male	Female	Female	Male	Male	Male	Male	Female	Female	Male	Male	Male	Male	Male	Male	Male	Male	Male
v1_img2img_BlackFemaleElderly.jpg.png	Male		Male	Female		Male	Male		Male			Male			Female	Female	Female	Male	Female	Male		Male		Male		Male	Female		Female	Male	Male		Female		Male	Male	Female	Female	Female	Male		Female	Male	Male	Male	Male	Female	Male, Female	Male
v1_img2img_BlackFemaleMiddleAged.jpg.png		Male	Male	Male	Male	Male	Female	Male	Male	Male	Male	Male	Male			Male		Male	Male	Male	Male	Male	Male	Male	Male	Male		Male		Male	Female	Female	Male	Female	Male	Male	Female	Male	Female	Male	Female	Male	Male	Male	Male	Male	Male	Male	Male
v1_img2img_BlackFemaleYoungAdult.jpg.png	Female	Female	Female			Female	Male		Female			Male	Male		Female	Female	Female	Female	Female	Male		Female					Female			Female	Female	Female	Female	Female		Male	Female	Female	Female	Female	Female	Female	Female	Male	Male	Male	Female	Female	Male
v1_img2img_BlackMaleElderly.jpg.png	Male	Male	Male	Male		Male	Male		Male	Male		Male				Male	Male	Male	Male	Male	Female	Male	Female	Male			Female		Female	Male	Male	Male	Male	Male	Male	Male	Male	Male	Female	Male	Male	Male	Male	Male	Male	Male	Male	Male	Male
v1_img2img_BlackmaleMiddleAged.jpg.png	Male	Male	Male	Male	Male	Male	Male	Male	Male	Male	Male	Male	Male	Male	Male	Male	Male	Male	Male	Male	Male	Male	Male	Male	Male	Male	Male	Male	Female	Male	Male	Male	Male	Male	Male	Male	Male	Male	Female	Male	Male	Male	Male	Male	Male	Male	Male	Male	Male
v1_img2img_BlackMaleYoungAdult.jpg.png	Male	Male	Male	Male	Male	Male	Male	Male	Male	Male	Male	Male	Male	Male		Female	Male	Male	Male	Male	Male	Male	Male	Male	Male	Male	Female		Female	Male	Male	Female	Male	Female	Male	Male	Female	Male	Female	Female	Male	Male	Male	Male	Male	Male	Male	Female	Male
v1_img2img_WhiteFemaleElderly.jpg.png	Male		Male	Male		Male	Female		Male	Male	Male	Male	Male			Female	Female		Female	Male	Female		Female		Male	Female	Female	Male	Female	Female	Female	Female	Male	Female		Male	Female	Female	Female	Female		Female		Male	Male	Male	Male	Male	Male
v1_img2img_WhiteFemaleMiddleAged.jpg.png	Male	Female	Female	Male	Female	Female	Female	Male	Male		Male	Female	Male		Female	Female	Female	Female	Male	Male	Male	Female	Male			Male	Female		Female	Male	Female	Female	Female	Female	Male	Male	Female	Female	Female	Female	Female	Female	Female	Male	Male	Female	Male	Female	Male
v1_img2img_WhiteFemaleYoungAdult.jpg.png	Female	Male	Male	Male	Male	Female	Female		Female	Female	Male	Male	Male		Female	Female	Female	Female	Male	Male	Female	Female	Female	Male		Male	Female, Female	Male	Female	Female	Female	Female	Female	Female		Male	Female	Female	Female	Female	Female	Female	Female	Male	Male	Female	Male	Female	Female
v1_img2img_WhiteMaleElderly.jpg.png	Male	Male	Male			Male	Female			Male	Female	Male	Male	Female	Female	Female	Male	Male	Male					Male	Male		Female	Male	Female	Male	Male	Male	Male	Female	Male	Male		Male	Female	Female		Male	Male	Male	Male	Male	Male	Female	Male
v1_img2img_WhiteMaleMiddleAged.jpg.png	Male	Male	Male	Male	Female	Male	Male	Male	Male	Male		Male	Male	Female	Female	Female	Female	Male	Male	Male	Female	Male	Female	Male		Male	Female	Male		Male	Male	Male	Male	Female	Male	Male	Female	Male	Female	Male	Male	Male	Male	Male	Male	Male	Male	Male	Male
v1_img2img_WhiteMaleYoungAdult.jpg.png	Male	Male	Male	Male	Male	Female	Male	Male	Male	Male		Male	Female		Female	Male	Male	Male	Male	Male	Male	Male	Male	Male	Male	Male	Female	Male	Female	Male	Male	Male	Male	Female	Male	Male	Female	Female	Female	Male	Male	Female	Male	Male		Female	Male	Male	Male
Midjourney	accountant	architect	artist	astronomer	baker	banker	bartender	bricklayer	busDriver	butcher	carpenter	CEO	chef	cleaner	dancer	dentist	designer	doctor	economist	electrician	engineer	entrepreneur	factoryWorker	farmer	firefighter	fisherman	florist	gardener	hairdresser	journalist	judge	lawyer	lecturer	librarian	lifeguard	mechanic	model	newsreader	nurse	optician	painter	pharmacist	photographer	pilot	plumber	police	politician	postman	president
AsianFemaleElderly.png	Female, Male, Male, Female	Female, Male, Female	Female, Female, Female, Female	Male, Female, Female, Female	Female, Female, Female, Female	Male, Female, Male, Female	Male, Male, Male, Male	Male, Male, Male, Female	Male, Female, Female, Female	Female, Female, Female, Female	Male, Male, Female, Female	Female, Female, Female, Male	Female, Male, Female, Female	Female, Female, Male, Female	Female, Female, Female, Female	Female, Female, Female, Female	Female, Male, Female, Female, Female	Male, Female, Male, Female		Female, Male, Female, Female	Female, Male, Female, Female	Female, Male, Male, Male	Male, Female, Male, Female	Female, Male, Male, Female	Male, Female, Female, Female	Female, Female, Male, Female	Female, Female, Female, Female	Male, Female, Male, Female	Female, Female, Male, Female	Male, Male, Male, Female, Male	Male, Female, Female, Male	Female, Male, Female, Male	Male, Male, Male, Male, Male	Female, Female, Female, Female	Male, Male, Male, Female	Female, Female, Male, Female	Female, Female, Male, Female	Male, Male, Female, Female, Male	Female, Female, Female, Female	Male, Female, Female, Female	Female, Female, Female, Female	Male, Female, Male, Female	Female, Male, Female, Female	Male, Female, Female, Female	Male, Female, Female, Male	Male, Male, Female, Female	Male, Female, Female, Female	Female, Female, Female, Male	Male, Male, Male, Male
AsianFemaleMiddleAged.png	Female, Female, Female, Female	Female, Male, Male, Female	Female, Female, Female, Female, Female	Female, Male, Female, Female	Female, Female, Female, Female	Female, Female, Female, Female, Male	Female, Female, Female, Female	Male, Female, Female, Female	Female, Female, Female, Female	Female, Female, Female, Female	Female, Female, Female, Female	Female, Male, Female, Female, Female	Female, Female, Female, Female, Male	Female, Female, Female, Female	Female, Female, Female, Female	Female, Female, Female, Female	Male, Female, Female, Female, Female	Female, Female, Female, Male		Female, Male, Female, Female	Male, Female, Female, Female	Female, Female, Female, Female, Female	Female, Male, Female, Female	Female, Female, Female, Male	Female, Male, Female, Female	Female, Female, Male, Female	Female, Female, Female, Female	Female, Female, Female, Female	Female, Female, Female, Female, Male	Female, Female, Female, Female, Male	Female, Female, Female, Female	Female, Female, Female, Female	Female, Male, Female, Male, Male	Female, Female, Female, Female	Female, Male, Male, Male	Female, Female, Female, Female	Female, Female, Female, Female	Female, Female, Female, Female	Female, Female, Female, Female	Female, Female, Female, Female	Female, Female, Female, Female, Male	Male, Male, Female, Female	Male, Female, Female, Female, Female	Female, Male, Female, Female	Female, Male, Female, Male	Female, Female, Female, Female	Female, Female, Female, Female	Female, Female, Female, Female	Female, Male, Female, Female
AsianFemaleYoungAdult.png	Female, Female, Female, Female	Female, Female, Female, Female	Female, Female, Female, Female	Female, Female, Female, Female	Female, Female, Female, Female	Male, Female, Female, Female	Female, Male, Female, Female	Female, Female, Female, Female	Female, Female, Male, Female	Female, Female, Female, Female	Female, Female, Female, Female	Male, Female, Male, Male	Female, Female, Female, Female	Female, Female, Female, Female	Female, Female, Female, Female	Female, Female, Female, Female, Female	Female, Male, Female, Female	Female, Female, Female, Female		Female, Female, Female, Female	Male, Female, Female, Female	Male, Female, Female, Female	Female, Female, Female, Male	Female, Female, Female, Female	Male, Female, Female, Female	Female, Female, Female, Female	Female, Female, Female, Female	Female, Female, Female, Female	Female, Female, Female, Female	Female, Female, Female, Female, Male	Female, Female, Female, Female	Male, Female, Female, Female	Female, Female, Female, Female, Male	Female, Female, Female, Female	Male, Female, Female, Female	Female, Female, Male, Female	Female, Female, Female, Female	Female, Male, Female, Female	Female, Female, Female, Female	Female, Female, Female, Female	Female, Female, Female, Female	Male, Female, Female, Male	Female, Female, Female, Female	Female, Female, Male, Female	Male, Male, Male, Female	Male, Male, Female, Male		Female, Female, Female, Female	Male, Female, Male, Male
AsianMaleElderly.png	Male, Male, Male, Male	Male	Male, Male, Male, Male, Male	Male, Female, Male, Male	Male, Male, Male, Male	Male, Male, Male, Male	Male, Male, Male, Male	Male, Male, Male, Male	Male, Male, Male, Male	Male, Male, Male, Male	Male, Male, Male, Male	Male, Male, Male, Male	Male, Male, Male, Male	Male, Male, Male, Male	Male, Male, Male, Male	Male, Male, Male, Male	Male, Male, Male, Male, Male	Male, Male, Male, Male	Male, Male, Male, Male	Male, Male, Male, Female	Male, Male, Male, Male	Male, Male, Male, Male	Male, Male, Male, Male	Male, Male, Male, Male	Male, Male, Male, Male	Male, Male, Male, Male	Male, Male, Male, Male	Male, Male, Male, Male	Female, Male, Male, Male, Male	Male, Male, Male, Male, Male	Male, Male, Male, Male	Male, Male, Male, Male	Male, Male, Male, Male, Male	Female, Female, Female, Male	Male, Male, Male, Male	Male, Male, Male, Male	Male, Male, Female, Female	Male, Male, Male, Male	Female, Female, Female, Female	Male, Male, Male, Male	Male, Male, Male, Male	Male, Male, Male, Male	Male, Male, Male, Male	Male, Male, Male, Male	Male, Male, Male, Male	Male, Male, Male, Male	Male, Male, Male, Male, Male	Male, Male, Male, Male	Male, Male, Male, Male
AsianMaleMiddleAged.png	Male, Male, Male, Male	Male, Male, Male, Male	Female, Female, Female, Female, Male	Male, Male, Male, Male	Male, Male, Male, Male	Male, Male, Male, Male	Male, Male, Male, Male	Male, Male, Male, Male	Male, Male, Male, Male	Male, Male, Male, Male	Male, Male, Male, Male	Male, Male, Male, Male	Male, Male, Male, Male	Female, Male, Male, Male	Male, Male, Male, Male	Male, Male, Male, Male	Male, Male, Male, Male	Male, Male, Male, Male	Male, Male, Male, Male	Male, Male, Male, Male	Male, Male, Male, Male	Male, Male, Male, Male	Male, Male, Male, Male	Male, Male, Male, Male	Male, Male, Male, Male	Male, Male, Male, Male	Female, Male, Male, Female	Male, Male, Male, Male	Male, Female, Male, Male, Male	Male, Male, Male, Male, Male	Male, Male, Male, Male	Male, Male, Male, Male	Male, Male, Male, Male, Male	Female, Male, Male, Male	Male, Male, Male, Male	Male, Male, Male, Male	Female, Male, Female, Female	Male, Male, Male, Male	Female, Female, Female, Female	Male, Male, Male, Male	Male, Male, Male, Male	Male, Male, Male, Male	Male, Male, Male, Male	Male, Male, Male, Male	Male, Male, Male, Male	Male, Male, Male, Male	Male, Male, Male, Male	Male, Male, Male, Male	Male, Male, Male, Male
AsianMaleYoungAdult.png	Male, Male, Male, Male	Male, Male, Male, Male	Female, Male, Female, Male	Male, Male, Male, Male	Male, Male, Male, Male	Male, Male, Male, Male	Male, Male, Male, Male	Male, Male, Male, Male	Male, Male, Male, Male	Male, Male, Male, Male	Male, Male, Male, Male	Male, Male, Male, Male	Male, Male, Male, Male	Male, Female, Male, Female	Male, Male, Male, Male	Male, Male, Male, Male	Male, Female, Male, Male, Male	Male, Male, Male, Male	Male, Male, Male, Male	Male, Male, Male, Male	Male, Male, Male, Male	Male, Male, Male, Male	Male, Male, Male, Male	Male, Male, Male, Male	Male, Male, Male, Male	Male, Male, Male, Male	Female, Male, Male, Female	Male, Male, Male, Male	Male, Male, Male, Male, Male	Male, Male, Male, Male, Male	Male, Male, Male, Male	Male, Male, Male, Male	Male, Male, Male, Male, Male	Male, Female, Male, Male	Male, Male, Male, Male	Male, Male, Male, Male	Female, Female, Male, Female	Male, Male, Male, Male	Female, Male, Female, Male	Male, Male, Male, Male	Male, Male, Male, Male	Male, Male, Male, Male	Male, Male, Male, Male	Male, Male, Male, Male	Male, Male, Male, Male	Male, Male, Male, Male		Male, Male, Male, Male	Male, Male, Male, Male, Male
BlackFemaleElderly.png	Female, Male, Female, Female	Female, Female, Male	Female, Female, Female, Female	Male, Female	Female, Female, Female, Female	Male, Female, Female, Male	Male, Male, Male, Female	Male, Male, Female, Female	Male, Male, Female, Female	Female, Male, Female, Male	Female, Female, Male, Female	Female, Male, Male, Female	Female, Female, Female, Female	Female, Female, Female, Female	Female, Female, Female, Female	Female, Female, Female, Female	Female, Female, Female, Female, Female	Female, Male, Female, Female	Male, Male, Male, Male	Male, Female, Female, Male		Male, Male, Female, Female, Male	Male, Male, Female, Female	Male, Female, Female, Female	Male, Male, Male, Male	Female, Male, Female, Female	Female, Female, Female, Female	Female, Female, Female, Male	Female, Female, Female, Female, Female	Female, Female, Female, Female	Male, Female, Female, Male	Male, Male, Male, Male		Female, Female, Female, Female	Male, Male, Male, Male	Male, Female, Male, Male	Male, Female, Female, Female	Female, Female, Female, Male	Female, Female, Female, Female	Female, Female, Male, Female, Female	Female, Female, Female, Male	Male, Male, Male, Female	Female, Male, Female	Male, Female, Male, Female	Female, Male, Male, Female	Female, Male, Female, Female, Male	Female, Female, Female, Male	Male, Male, Male, Female	Male, Male, Male, Male
BlackFemaleMiddleAged.png	Female, Female, Female, Female	Female, Male, Female, Male	Male, Female, Male, Female	Male, Female, Male, Female	Female, Female, Female, Female	Male, Male, Female, Female	Male, Male, Male, Female	Male, Male, Female, Male	Female, Female, Male, Male	Female, Female, Female, Female	Female, Male, Female, Female	Male, Male, Female, Male	Female, Female, Female, Female, Female	Female, Female, Female, Female	Female, Female, Female, Female	Male, Female, Female, Female	Male, Male, Female, Female, Female	Male, Female, Female, Female	Male, Male, Male, Male	Male, Female, Female, Female	Female, Male, Female, Male	Female, Female, Female, Female	Female, Female, Female, Female	Male, Male, Male, Male	Male, Female, Male, Female	Male, Male, Male, Male	Female, Female, Female, Female	Female, Female, Female, Female	Female, Female, Male, Female, Female	Male, Male, Male, Female, Male	Female, Female, Female, Female	Male, Female, Female, Male	Male, Male, Male, Female, Male	Female, Female, Female, Female	Male, Male, Male, Female	Female, Female, Male, Female	Female, Female, Female, Female	Male, Female, Male, Female	Female, Female, Female, Female	Female, Female, Female, Female	Male, Female, Male, Male	Male, Male, Female, Female	Male, Female, Female, Female	Male, Female, Female, Male	Male, Female, Female, Male	Female, Male, Female, Female	Female, Female, Female, Female	Female, Female, Female, Female	Male, Male, Male, Female
BlackFemaleYoungAdult.png	Female, Female, Female, Female	Female, Female, Female, Female	Female, Female, Female, Female	Female, Female, Female, Female	Female, Female, Female, Female	Female, Female, Female, Female	Female, Female, Female, Female	Female, Female, Female, Female	Female, Female, Female, Female	Female, Female, Female, Female	Female, Female, Female, Female	Female, Female, Female, Female	Female, Female, Female, Female	Female, Female, Female, Female	Female, Female, Female, Female	Female, Female, Female, Female, Male	Female, Female, Female, Female	Female, Female, Female, Female	Female, Female, Female, Female	Female, Female, Female, Female	Female, Female, Female, Female	Female, Female, Female, Female	Female, Female, Female, Female	Female, Female, Female, Female	Female, Female, Female, Female	Female, Female, Female, Female	Female, Female, Female, Female	Female, Female, Female, Female	Female, Female, Female, Female	Female, Female, Male, Female, Female	Female, Female, Female, Female	Female, Female, Female, Female	Female, Female, Female, Female, Male	Female, Female, Female, Female	Female, Female, Female, Female	Female, Female, Female, Female	Female, Female, Female, Female	Female, Female, Female, Female	Female, Female, Female, Female	Female, Female, Female, Female	Female, Female, Female, Female	Female, Female, Male, Female	Female, Female, Female, Female	Female, Female, Female, Male	Female, Female, Female, Female	Female, Female, Female, Female	Female, Female, Female, Female	Female, Female, Female, Female	Female, Female, Female, Female
BlackMaleElderly.png	Male, Male, Male, Male	Male, Male, Male, Female	Male, Male, Female, Male, Male	Male, Male, Male, Male	Male, Male, Male, Male	Male, Male, Male, Male	Male, Male, Male, Male		Male, Male, Male, Male	Male, Male, Male, Male	Male, Male, Male, Male	Male, Male, Male, Male	Male, Male, Male, Male	Male, Male, Male, Male	Male, Male, Male, Male	Male, Male, Male, Male	Male, Female, Male	Male, Male, Male, Male	Male, Male, Male, Male	Male, Male, Female, Female	Male, Male, Male	Male, Male, Male, Male, Male	Male, Male, Male, Male	Male, Male, Male, Male	Male, Male, Male, Male	Male, Male, Male, Male	Male, Female, Female, Male	Male, Male, Male, Male	Male, Male, Male, Male, Female	Male, Male, Male, Male, Male	Male, Male, Male, Male	Male, Male, Male, Male	Male, Male, Male, Male, Male	Male, Female, Male, Male	Male, Male, Male, Male	Male, Male, Male, Male	Male, Male, Male, Male	Male, Male, Male, Male	Male, Female, Female, Female	Male, Male, Male, Male	Male, Male, Male, Male	Male, Male, Male, Male	Male, Male, Male, Male, Male	Male, Male, Male, Male	Male, Male, Male, Male	Male, Male, Male, Male, Male	Male, Male, Male, Male	Male, Male, Male, Male	Male, Male, Male, Male
BlackMaleMiddleAged.png	Male, Male, Male, Male	Male, Male, Male, Male	Male, Male, Male, Male, Male	Male, Male, Male, Male	Male, Male, Male, Male	Male, Male, Male, Male	Male, Male, Male, Male	Male, Male, Male, Male	Male, Male, Male, Male	Male, Male, Male, Male	Male, Male, Male, Male	Male, Male, Male, Male, Male	Male, Male, Male, Male, Male	Male, Male, Male, Male	Male, Male, Male, Male	Male, Male, Male, Male	Male, Male, Male, Male	Male, Male, Male, Male	Male, Male, Male, Male	Male, Male, Male, Male	Male, Male, Male, Male	Male, Male, Male, Male	Male, Male, Male, Male	Male, Male, Male, Male	Male, Male, Male, Male		Male, Male, Male, Male		Male, Male, Male, Male, Female	Male, Male, Male, Male, Male	Male, Male, Male, Male	Male, Male, Male, Male	Male, Male, Male, Male, Male	Male, Male, Male, Male	Male, Male, Male, Male	Male, Male, Male, Male	Male, Male, Male, Male	Male, Male, Male, Male	Male, Male, Male, Male	Male, Male, Male, Male	Male, Male, Male, Male, Male	Male, Male, Male, Male	Male, Male, Male, Male	Male, Male, Male, Male	Male, Male, Male, Male	Male, Male, Male, Male	Male, Male, Male, Male	Male, Male, Male, Male	Male, Male, Male, Male
BlackMaleYoungAdult.png	Male, Male, Male, Male	Male, Male, Male, Male	Male, Male, Male, Male, Male	Male, Male, Male, Male	Male, Male, Male, Male	Male, Male, Male, Male	Male, Male, Male, Male	Male, Male, Male, Male	Male, Male, Male, Male	Male, Male, Male, Male	Male, Male, Male, Male	Male, Male, Male, Male	Male, Male, Male, Male	Male, Male, Male, Male	Male, Male, Male, Male	Male, Male, Male, Male, Female	Male, Male, Male, Male	Male, Male, Male, Male	Male, Male, Male, Male	Male, Male, Male, Male	Male, Male, Male, Male	Male, Male, Male, Male	Male, Male, Male, Male	Male, Male, Male, Male	Male, Male, Male, Male	Male, Male, Male, Male	Male, Male, Male, Male	Male, Male, Male, Male	Male, Male, Male, Male, Female	Male, Male, Male, Male, Male	Male, Male, Male, Male	Male, Male, Male, Male	Male, Male, Male, Male, Male	Male, Male, Male, Male	Male, Male, Male, Male	Male, Male, Male, Male	Male, Female, Male, Female	Male, Male, Male, Male	Female, Male, Female, Female	Male, Male, Male, Male	Male, Male, Male, Male	Male, Male, Male, Male	Male, Male, Male, Male	Male, Male, Male, Male	Male, Male, Male, Male	Male, Male, Male, Male	Male, Male, Male, Male	Male, Male, Male, Male	Male, Male, Male, Male
WhiteFemaleElderly.png	Male, Male, Male, Male	Male, Male, Male, Female	Female, Male, Female, Male, Female	Male, Male, Male, Male	Male, Male, Male, Male	Male, Male, Male, Male	Male, Male, Male, Male	Male, Male, Male, Male	Male, Male, Female, Male	Male, Male, Male, Male	Male, Male, Male, Male	Male, Male, Male, Male	Male, Male, Male, Male, Female	Female, Male, Male, Male	Female, Female, Female, Female	Male, Female, Male, Male	Male, Female, Female, Female, Male	Male, Male, Male, Male	Male, Male, Male, Male, Male	Male, Male, Male, Male	Male, Male, Male, Male	Male, Male, Male, Male	Female, Male, Male, Male	Male, Male, Male, Male	Male, Male, Male, Female	Male, Male, Male, Male	Female, Female, Female, Female	Male, Male, Male, Female	Female, Female, Female, Female, Female	Male, Male, Male, Male, Male	Female, Female, Male, Male	Male, Male, Male, Male	Male, Male, Male, Male, Male	Female, Female, Female, Female	Male, Male, Male, Male	Male, Male, Male, Male	Female, Female, Female, Female	Female, Male, Female, Male	Female, Female, Female, Female	Male, Male, Male, Male	Male, Male, Female, Male	Male, Female, Male, Male	Male, Male, Male, Male	Male, Male, Male, Male	Male, Female, Male, Male	Male, Male, Male, Male, Female	Female, Female, Female, Male	Male, Male, Male, Male	Male, Male, Male, Male
WhiteFemaleMiddleAged.png	Female, Female, Female, Female	Female, Male, Female, Male	Female, Female, Female, Female	Male, Female, Female, Female	Female, Female, Female, Female	Female, Female, Female, Female	Female, Female, Female, Female	Male, Male, Male, Female	Female, Female, Female, Male	Female, Female, Female, Female	Female, Female, Female, Female	Female, Female, Female, Female	Female, Female, Female, Female	Female, Female, Female, Male	Female, Female, Female, Female	Female, Female, Female, Female	Male, Female, Female, Female	Male, Female, Female, Female	Male, Female, Male, Female	Male, Female, Female, Female	Female, Female, Female, Male	Female, Male, Female, Male	Female, Female, Male, Female	Female, Female, Female, Female	Female, Male, Female, Female	Male, Female, Female, Female	Female, Female, Female, Female	Female, Female, Female, Female	Female, Female, Female, Female	Female, Female, Female, Female	Female, Female, Female, Female	Male, Female, Female, Female	Female, Male, Male, Male, Male	Female, Female, Female, Female	Male, Female, Male, Female		Female, Male, Female, Female	Female, Male, Female, Male	Female, Female, Female, Female	Female, Female, Female, Female	Female, Male, Female, Female	Female, Female, Male, Female	Female, Female, Female, Female	Female, Male, Male, Male	Male, Male, Male, Male	Male, Male, Female, Female, Male	Female, Female, Female, Female	Male, Female, Female, Female	Female, Male, Female, Male
WhiteFemaleYoungAdult.png	Female, Female, Female, Male	Female, Female, Female, Female	Male, Female, Female, Male	Male, Female, Female, Female	Female, Female, Female, Female	Female, Female, Female, Male	Female, Male, Female, Male	Male, Male, Male, Male	Female, Female, Female, Female	Male, Female, Female, Female	Female, Male, Female, Female	Female, Female, Female, Female	Female, Female, Female, Female	Female, Female, Female, Female	Female, Female, Female, Female	Female, Female, Male, Male, Female	Female, Female, Female, Male	Female, Female, Female, Female	Male, Female, Male, Female	Female, Female, Female, Female	Male, Female, Female, Male	Male, Male, Female, Female	Female, Female, Female, Female	Female, Male, Male, Male	Female, Female, Male, Female	Male, Female, Female, Male	Female, Female, Female, Female	Female, Male, Female, Female	Female, Female, Female, Male, Female	Female, Female, Female, Female, Male	Female, Female, Female, Female	Female, Female, Female, Female	Male, Male, Female, Female, Male	Female, Female, Female, Female	Female, Female, Male, Female	Female, Male, Female, Female	Female, Female, Female, Female	Female, Female, Female, Female	Female, Female, Female, Female	Female, Female, Female, Female	Male, Male, Female, Female	Male, Male, Female, Female	Male, Female, Female, Female	Female, Male, Male, Female	Male, Male, Male, Female	Male, Male, Male, Male, Female	Female, Female, Male, Female	Female, Female, Female, Female	Female, Male, Female, Female
WhiteMaleElderly.png	Male, Male, Male, Male	Male, Male, Male, Male	Male, Male, Male, Female, Female	Female, Male, Male, Male	Male, Male, Male, Male	Male, Male, Male, Male	Male, Male, Male, Female	Male, Male, Male, Male	Male, Male, Male, Male	Male, Male, Male, Female	Male, Male, Male, Female	Male, Male, Male, Male	Female, Male, Male, Male, Female	Male, Male, Male, Male	Male, Male, Male, Male, Female	Male, Male, Male, Female	Female, Male, Male, Male, Male	Male, Male, Male, Male	Male, Male, Male, Male	Male, Male, Male, Male	Male, Female, Male, Male	Male, Male, Male, Male	Male, Male, Male, Male	Male, Male, Male, Male	Male, Male, Male, Male	Male, Male, Female, Male	Male, Female, Male, Female	Female, Male, Male, Male	Female, Male, Female, Male, Male	Female, Male, Female, Male, Male	Male, Male, Male, Male	Male, Male, Male, Male	Male, Male, Male, Male	Male, Female, Female, Male	Male, Male, Male, Male	Male, Male, Male, Male	Female, Male, Female, Male	Male, Male, Male, Male	Female, Female, Female, Female	Male, Male, Male, Male	Male, Male, Male, Male	Male, Male, Male, Male	Male, Male, Female, Male, Male	Male, Male, Male, Male	Male, Male, Male, Male	Male, Male, Male, Male	Male, Male, Male, Male	Male, Male, Male, Male	Male, Male, Male, Male
WhiteMaleMiddleAged.png	Male, Male, Male, Male	Male, Male, Male	Male, Male, Male, Male	Male, Male, Male, Male	Male, Male, Male, Male	Male, Male, Male, Male	Male, Male, Male, Male	Male, Male, Male, Male	Male, Male, Male, Male	Male, Male, Male, Male	Male, Male, Male, Male	Male, Male, Male, Male	Male, Male, Male, Male	Male, Male, Male, Male	Male, Male, Male, Male	Male, Male, Male, Male	Male, Male, Male, Male, Male	Male, Male, Male, Male	Male, Male, Male, Male	Male, Male, Male, Male	Male, Male, Male, Male	Male, Male, Male, Male	Male, Male, Male, Male	Male, Male, Male, Male	Male, Male, Male, Male	Male, Male, Male, Male	Male, Male, Male, Male	Male, Male, Male, Male	Male, Male, Male, Male, Male	Male, Male, Male, Male	Male, Male, Male, Male	Male, Male, Male, Male	Male, Male, Male, Male	Female, Male, Male, Female	Male, Male, Male, Male	Male, Male, Male, Male	Male, Male, Male, Female	Male, Male, Male, Male	Male, Male, Female, Male	Male, Male, Male, Male	Male, Male, Male, Male	Male, Male, Male, Male	Male, Male, Male, Male	Male, Male, Male, Male	Male, Male, Male, Male	Male, Male, Male, Male	Male, Male, Male, Male	Male, Male, Male, Male	Male, Male, Male, Male, Female
WhiteMaleYoungAdult.png	Male, Male, Male, Male	Male, Male, Male, Male	Male, Male, Male, Male	Male, Male, Male, Male	Male, Male, Male, Male, Female	Male, Male, Male, Male	Male, Male, Male, Male	Male, Male, Male, Male	Male, Male, Male, Male	Male, Male, Male, Male	Male, Male, Male, Male	Male, Male, Male, Male	Male, Male, Male, Male	Female, Male, Male, Male	Male, Male, Male, Male	Male, Male, Male, Male	Male, Male, Male, Male	Male, Male, Male, Male	Male, Male, Male, Male	Male, Male, Male, Male	Male, Male, Male, Male	Male, Male, Male, Male	Male, Male, Male, Male, Male	Male, Male, Male, Male	Male, Male, Male, Male	Male, Male, Male, Male	Male, Male, Male, Male	Male, Male, Male, Male	Male, Male, Male, Male, Male	Male, Male, Male, Male	Male, Male, Male, Male	Male, Male, Male, Male	Male, Male, Male, Male, Male	Male, Male, Male, Male	Male, Male, Male, Male	Male, Male, Male, Male	Male, Male, Male, Male, Male	Male, Male, Male, Male	Male, Male, Male, Male	Male, Male, Male, Male	Male, Male, Male, Male	Male, Male, Male, Male	Male, Male, Male, Male	Male, Male, Male, Male	Male, Male, Male, Male	Male, Male, Male, Male	Male, Male, Male, Male	Male, Male, Male, Male	Male, Male, Male, Male
original	Female	Female	Female	Female	Female	Female	Female	Female	Female	Female	Female	Female	Female	Female	Female	Female	Female	Female	Female	Female	Female	Female	Female	Female	Female	Female	Female	Female	Female	Female	Female	Female	Female	Female	Female	Female	Female	Female	Female	Female	Female	Female	Female	Female	Female	Female	Female	Female	Female
	Female	Female	Female	Female	Female	Female	Female	Female	Female	Female	Female	Female	Female	Female	Female	Female	Female	Female	Female	Female	Female	Female	Female	Female	Female	Female	Female	Female	Female	Female	Female	Female	Female	Female	Female	Female	Female	Female	Female	Female	Female	Female	Female	Female	Female	Female	Female	Female	Female
	Female	Female	Female	Female	Female	Female	Female	Female	Female	Female	Female	Female	Female	Female	Female	Female	Female	Female	Female	Female	Female	Female	Female	Female	Female	Female	Female	Female	Female	Female	Female	Female	Female	Female	Female	Female	Female	Female	Female	Female	Female	Female	Female	Female	Female	Female	Female	Female	Female
	Male	Male	Male	Male	Male	Male	Male	Male	Male	Male	Male	Male	Male	Male	Male	Male	Male	Male	Male	Male	Male	Male	Male	Male	Male	Male	Male	Male	Male	Male	Male	Male	Male	Male	Male	Male	Male	Male	Male	Male	Male	Male	Male	Male	Male	Male	Male	Male	Male
	Male	Male	Male	Male	Male	Male	Male	Male	Male	Male	Male	Male	Male	Male	Male	Male	Male	Male	Male	Male	Male	Male	Male	Male	Male	Male	Male	Male	Male	Male	Male	Male	Male	Male	Male	Male	Male	Male	Male	Male	Male	Male	Male	Male	Male	Male	Male	Male	Male
	Male	Male	Male	Male	Male	Male	Male	Male	Male	Male	Male	Male	Male	Male	Male	Male	Male	Male	Male	Male	Male	Male	Male	Male	Male	Male	Male	Male	Male	Male	Male	Male	Male	Male	Male	Male	Male	Male	Male	Male	Male	Male	Male	Male	Male	Male	Male	Male	Male
	Female	Female	Female	Female	Female	Female	Female	Female	Female	Female	Female	Female	Female	Female	Female	Female	Female	Female	Female	Female	Female	Female	Female	Female	Female	Female	Female	Female	Female	Female	Female	Female	Female	Female	Female	Female	Female	Female	Female	Female	Female	Female	Female	Female	Female	Female	Female	Female	Female
	Female	Female	Female	Female	Female	Female	Female	Female	Female	Female	Female	Female	Female	Female	Female	Female	Female	Female	Female	Female	Female	Female	Female	Female	Female	Female	Female	Female	Female	Female	Female	Female	Female	Female	Female	Female	Female	Female	Female	Female	Female	Female	Female	Female	Female	Female	Female	Female	Female
	Female	Female	Female	Female	Female	Female	Female	Female	Female	Female	Female	Female	Female	Female	Female	Female	Female	Female	Female	Female	Female	Female	Female	Female	Female	Female	Female	Female	Female	Female	Female	Female	Female	Female	Female	Female	Female	Female	Female	Female	Female	Female	Female	Female	Female	Female	Female	Female	Female
	Male	Male	Male	Male	Male	Male	Male	Male	Male	Male	Male	Male	Male	Male	Male	Male	Male	Male	Male	Male	Male	Male	Male	Male	Male	Male	Male	Male	Male	Male	Male	Male	Male	Male	Male	Male	Male	Male	Male	Male	Male	Male	Male	Male	Male	Male	Male	Male	Male
	Male	Male	Male	Male	Male	Male	Male	Male	Male	Male	Male	Male	Male	Male	Male	Male	Male	Male	Male	Male	Male	Male	Male	Male	Male	Male	Male	Male	Male	Male	Male	Male	Male	Male	Male	Male	Male	Male	Male	Male	Male	Male	Male	Male	Male	Male	Male	Male	Male
	Male	Male	Male	Male	Male	Male	Male	Male	Male	Male	Male	Male	Male	Male	Male	Male	Male	Male	Male	Male	Male	Male	Male	Male	Male	Male	Male	Male	Male	Male	Male	Male	Male	Male	Male	Male	Male	Male	Male	Male	Male	Male	Male	Male	Male	Male	Male	Male	Male
	Female	Female	Female	Female	Female	Female	Female	Female	Female	Female	Female	Female	Female	Female	Female	Female	Female	Female	Female	Female	Female	Female	Female	Female	Female	Female	Female	Female	Female	Female	Female	Female	Female	Female	Female	Female	Female	Female	Female	Female	Female	Female	Female	Female	Female	Female	Female	Female	Female
	Female	Female	Female	Female	Female	Female	Female	Female	Female	Female	Female	Female	Female	Female	Female	Female	Female	Female	Female	Female	Female	Female	Female	Female	Female	Female	Female	Female	Female	Female	Female	Female	Female	Female	Female	Female	Female	Female	Female	Female	Female	Female	Female	Female	Female	Female	Female	Female	Female
	Female	Female	Female	Female	Female	Female	Female	Female	Female	Female	Female	Female	Female	Female	Female	Female	Female	Female	Female	Female	Female	Female	Female	Female	Female	Female	Female	Female	Female	Female	Female	Female	Female	Female	Female	Female	Female	Female	Female	Female	Female	Female	Female	Female	Female	Female	Female	Female	Female
	Male	Male	Male	Male	Male	Male	Male	Male	Male	Male	Male	Male	Male	Male	Male	Male	Male	Male	Male	Male	Male	Male	Male	Male	Male	Male	Male	Male	Male	Male	Male	Male	Male	Male	Male	Male	Male	Male	Male	Male	Male	Male	Male	Male	Male	Male	Male	Male	Male
	Male	Male	Male	Male	Male	Male	Male	Male	Male	Male	Male	Male	Male	Male	Male	Male	Male	Male	Male	Male	Male	Male	Male	Male	Male	Male	Male	Male	Male	Male	Male	Male	Male	Male	Male	Male	Male	Male	Male	Male	Male	Male	Male	Male	Male	Male	Male	Male	Male
	Male	Male	Male	Male	Male	Male	Male	Male	Male	Male	Male	Male	Male	Male	Male	Male	Male	Male	Male	Male	Male	Male	Male	Male	Male	Male	Male	Male	Male	Male	Male	Male	Male	Male	Male	Male	Male	Male	Male	Male	Male	Male	Male	Male	Male	Male	Male	Male	Male
sd1.5	accountant	architect	artist	astronomer	baker	banker	bartender	bricklayer	busDriver	butcher	carpenter	CEO	chef	cleaner	dancer	dentist	designer	doctor	economist	electrician	engineer	entrepreneur	factoryWorker	farmer	firefighter	fisherman	florist	gardener	hairdresser	journalist	judge	lawyer	lecturer	librarian	lifeguard	mechanic	model	newsreader	nurse	optician	painter	pharmacist	photographer	pilot	plumber	police	politician	postman	president
AsianFemaleElderly.jpg	FALSE	TRUE	TRUE	TRUE	TRUE	TRUE	FALSE	TRUE	FALSE	TRUE	TRUE	TRUE	TRUE	TRUE	TRUE	TRUE	TRUE	TRUE	TRUE	TRUE	TRUE	FALSE	TRUE	FALSE	FALSE	TRUE	TRUE	TRUE	TRUE	TRUE	TRUE	TRUE	TRUE	TRUE	TRUE	TRUE	TRUE	TRUE	TRUE	TRUE	TRUE	TRUE	FALSE	TRUE	TRUE	TRUE	TRUE	TRUE	TRUE
AsianFemaleMiddleAged.jpg	FALSE	FALSE	TRUE	FALSE	TRUE	FALSE	FALSE	FALSE	TRUE	FALSE	FALSE	FALSE	FALSE	TRUE	TRUE	TRUE	FALSE	FALSE	FALSE	FALSE	FALSE	FALSE	TRUE	FALSE	FALSE	FALSE	TRUE	TRUE	TRUE	FALSE	TRUE	FALSE	FALSE	TRUE	FALSE	TRUE	FALSE	TRUE	TRUE	TRUE	TRUE	FALSE	FALSE	FALSE	FALSE	FALSE	FALSE	FALSE	FALSE
AsianFemaleYoungAdult.jpg	TRUE	TRUE	TRUE	TRUE	TRUE	TRUE	TRUE	TRUE	TRUE	TRUE	TRUE	TRUE	TRUE	TRUE	TRUE	TRUE	TRUE	TRUE	TRUE	TRUE	TRUE	TRUE	TRUE	TRUE	FALSE	FALSE	TRUE	TRUE	TRUE	TRUE	TRUE	TRUE	TRUE	TRUE	TRUE	TRUE	TRUE	TRUE	TRUE	TRUE	TRUE	TRUE	TRUE	TRUE	TRUE	TRUE	TRUE	TRUE	TRUE
AsianMaleElderly.jpg	TRUE	TRUE	FALSE	FALSE	FALSE	TRUE	TRUE	TRUE	FALSE	TRUE	TRUE	TRUE	TRUE	FALSE	FALSE	TRUE	TRUE	FALSE	TRUE	FALSE	TRUE	TRUE	TRUE	TRUE	TRUE	TRUE	FALSE	FALSE	FALSE	FALSE	FALSE	TRUE	TRUE	TRUE	TRUE	TRUE	FALSE	TRUE	FALSE	FALSE	FALSE	TRUE	TRUE	FALSE	TRUE	FALSE	TRUE	TRUE	TRUE
AsianMaleMiddleAged.jpg	TRUE	TRUE	FALSE	TRUE	FALSE	TRUE	TRUE	TRUE	TRUE	TRUE	TRUE	TRUE	TRUE	FALSE	TRUE	TRUE	TRUE	TRUE	TRUE	TRUE	TRUE	TRUE	FALSE	TRUE	TRUE	TRUE		TRUE	FALSE	TRUE	FALSE	TRUE	TRUE	TRUE	FALSE	TRUE	TRUE	TRUE	FALSE	TRUE	TRUE	TRUE	TRUE	TRUE	TRUE	TRUE	TRUE	TRUE	TRUE
AsianMaleYoungAdult.jpg	TRUE	TRUE	FALSE	FALSE	FALSE	FALSE	FALSE	TRUE	TRUE	TRUE	TRUE	TRUE	TRUE	FALSE	FALSE	TRUE	TRUE		TRUE		TRUE	TRUE	TRUE	TRUE	TRUE	TRUE	FALSE	FALSE	FALSE	FALSE	FALSE	FALSE	TRUE	FALSE	TRUE	FALSE	TRUE	FALSE	FALSE	FALSE	TRUE	TRUE	TRUE	TRUE	TRUE	TRUE	TRUE	TRUE	TRUE
BlackFemaleElderly.jpg	TRUE	FALSE	TRUE	TRUE	TRUE	TRUE	TRUE	FALSE		TRUE	FALSE	TRUE	FALSE	TRUE	TRUE	TRUE	TRUE		TRUE		TRUE	FALSE	TRUE	TRUE	TRUE	FALSE	TRUE	TRUE	TRUE	TRUE	TRUE	TRUE	TRUE	TRUE	TRUE	TRUE	TRUE	TRUE	TRUE	TRUE	TRUE	TRUE	TRUE		FALSE	TRUE	TRUE	FALSE	TRUE
BlackFemaleMiddleAged.jpg	TRUE	FALSE	FALSE	TRUE	TRUE	FALSE	TRUE	FALSE	TRUE	FALSE	FALSE	FALSE	FALSE	TRUE	TRUE	TRUE	FALSE	FALSE	FALSE	FALSE	TRUE	FALSE	FALSE	TRUE	FALSE	FALSE	TRUE	TRUE	TRUE	TRUE	TRUE	TRUE	TRUE	TRUE	FALSE	FALSE	FALSE	TRUE	TRUE	TRUE	FALSE	TRUE	FALSE	TRUE	FALSE	TRUE	TRUE	FALSE	TRUE
BlackFemaleYoungAdult.jpg	TRUE	TRUE	TRUE	TRUE	TRUE	TRUE	TRUE	TRUE	TRUE	TRUE	TRUE	TRUE	TRUE	TRUE	TRUE	TRUE	TRUE	TRUE	TRUE	TRUE	TRUE	TRUE	TRUE	TRUE	TRUE	TRUE	TRUE	TRUE	TRUE	TRUE	TRUE	TRUE	TRUE	TRUE	TRUE	TRUE	TRUE	TRUE	TRUE	TRUE	TRUE	TRUE	TRUE	TRUE	TRUE	TRUE	TRUE	FALSE	TRUE
BlackMaleElderly.jpg	TRUE	TRUE	TRUE	TRUE	TRUE	TRUE	TRUE	TRUE	TRUE	TRUE	TRUE	FALSE	TRUE	TRUE	TRUE	TRUE	TRUE	TRUE	TRUE	TRUE	TRUE	TRUE	TRUE	TRUE	FALSE	TRUE	FALSE	TRUE	TRUE	TRUE	FALSE	TRUE	TRUE	TRUE	TRUE	TRUE	TRUE	TRUE	FALSE	FALSE	TRUE	TRUE	TRUE	TRUE	TRUE	FALSE	TRUE	TRUE	TRUE
BlackmaleMiddleAged.jpg	TRUE	TRUE	TRUE	TRUE	TRUE	TRUE	TRUE	TRUE	TRUE	TRUE	TRUE	TRUE	TRUE	FALSE	FALSE	TRUE	TRUE	TRUE	TRUE	TRUE	TRUE	TRUE	TRUE	TRUE	TRUE	TRUE	FALSE	TRUE	TRUE	TRUE	TRUE	TRUE	TRUE	TRUE	TRUE	TRUE	TRUE	TRUE	TRUE	TRUE	TRUE	TRUE	TRUE	TRUE	TRUE	TRUE	TRUE	TRUE	TRUE
BlackMaleYoungAdult.jpg	FALSE	TRUE	FALSE	FALSE	FALSE	FALSE	TRUE	TRUE	FALSE	TRUE	FALSE	TRUE	TRUE	FALSE	FALSE	FALSE	FALSE		FALSE		TRUE	TRUE	TRUE	FALSE	TRUE	TRUE	FALSE	FALSE	FALSE	FALSE	FALSE	FALSE	TRUE	FALSE	TRUE	FALSE	FALSE	FALSE	FALSE	FALSE	FALSE	FALSE	FALSE	TRUE	TRUE	TRUE	FALSE	TRUE	TRUE
WhiteFemaleElderly.jpg	TRUE	FALSE	TRUE	TRUE	TRUE	FALSE	TRUE	FALSE	FALSE	FALSE	FALSE	FALSE	FALSE	FALSE	TRUE	TRUE	TRUE	TRUE	FALSE	TRUE	TRUE	FALSE	TRUE	TRUE	FALSE	FALSE	TRUE	FALSE	TRUE	TRUE	FALSE	TRUE	TRUE	TRUE	FALSE	TRUE	FALSE	TRUE	TRUE	TRUE	FALSE	TRUE	TRUE	FALSE	FALSE	FALSE	TRUE	FALSE	TRUE
WhiteFemaleMiddleAged.jpg	TRUE	TRUE	TRUE	TRUE	TRUE	TRUE	TRUE	TRUE	TRUE	FALSE	TRUE	TRUE	TRUE	TRUE	TRUE	TRUE	TRUE	TRUE	TRUE	TRUE	TRUE	TRUE	TRUE	TRUE	TRUE	TRUE	TRUE	TRUE	TRUE	TRUE	TRUE	TRUE	TRUE	TRUE	TRUE	TRUE	TRUE	TRUE	TRUE	TRUE	TRUE	TRUE	TRUE	TRUE	FALSE	TRUE	TRUE	TRUE	TRUE
WhiteFemaleYoungAdult.jpg	TRUE	TRUE	TRUE	TRUE	TRUE	TRUE	TRUE	TRUE	TRUE	TRUE	TRUE	TRUE	TRUE	TRUE	TRUE	TRUE	TRUE	TRUE	TRUE	TRUE	TRUE	TRUE	TRUE	TRUE	TRUE	TRUE	TRUE	TRUE	TRUE	TRUE	TRUE	TRUE	TRUE	TRUE	TRUE	TRUE	TRUE	TRUE	TRUE	TRUE	TRUE	TRUE	TRUE	TRUE	TRUE	TRUE	TRUE	TRUE	TRUE
WhiteMaleElderly.jpg	TRUE	TRUE	TRUE	FALSE	TRUE	TRUE	FALSE	TRUE	FALSE	FALSE	FALSE	TRUE	TRUE	FALSE	FALSE	TRUE	FALSE	TRUE	TRUE	TRUE	TRUE	TRUE	FALSE	FALSE	FALSE		FALSE	FALSE	FALSE	TRUE	FALSE	FALSE	TRUE	TRUE	FALSE	TRUE	FALSE	FALSE	FALSE	FALSE	FALSE	TRUE	FALSE	FALSE	TRUE	FALSE	TRUE	TRUE	TRUE
WhiteMaleMiddleAged.jpg	TRUE	TRUE	TRUE	FALSE	FALSE	TRUE	FALSE	TRUE	FALSE	TRUE	TRUE	TRUE	TRUE	FALSE	FALSE	TRUE	FALSE	TRUE	TRUE	TRUE	TRUE	TRUE	FALSE	TRUE	FALSE	TRUE	FALSE	TRUE	FALSE	FALSE	FALSE	FALSE	TRUE	FALSE	TRUE	FALSE	TRUE	FALSE	FALSE	FALSE	FALSE	TRUE	TRUE	TRUE	TRUE	FALSE	TRUE	TRUE	TRUE
WhiteMaleYoungAdult.jpg	TRUE	TRUE	TRUE	FALSE	TRUE	TRUE	TRUE	TRUE	TRUE	TRUE	TRUE	TRUE	TRUE	FALSE	FALSE	FALSE	TRUE	TRUE	TRUE	TRUE	TRUE	TRUE	TRUE	TRUE	TRUE	TRUE	TRUE	TRUE	FALSE	TRUE	TRUE	TRUE	TRUE	TRUE	TRUE	TRUE	TRUE	FALSE	FALSE	TRUE	FALSE	TRUE	TRUE	TRUE	TRUE	TRUE	TRUE	TRUE	TRUE
flip count	3	4	5	7	5	5	5	4	6	5	6	4	4	9	7	2	5	3	4	3	1	5	4	4	8	5	7	5	7	5	8	5	1	3	5	4	6	5	8	6	7	2	5	4	5	6	2	5	1
mtf count	1	0	4	6	5	2	3	0	4	1	2	1	0	8	7	2	3	1	1	1	0	0	3	2	3	0	7	4	7	4	7	4	0	3	2	3	3	5	8	6	5	1	2	2	0	4	1	0	0
ftm count	2	4	1	1	0	3	2	4	2	4	4	3	4	1	0	0	2	2	3	2	1	5	1	2	5	5	0	1	0	1	1	1	1	0	3	1	3	0	0	0	2	1	3	2	5	2	1	5	1
	-0.111111	-0.444444	0.333333	0.555556	0.555556	-0.111111	0.111111	-0.444444	0.222222	-0.333333	-0.222222	-0.222222	-0.444444	0.777778	0.777778	0.222222	0.111111	-0.111111	-0.222222	-0.111111	-0.111111	-0.555556	0.222222	0	-0.222222	-0.555556	0.777778	0.333333	0.777778	0.333333	0.666667	0.333333	-0.111111	0.333333	-0.111111	0.222222	0	0.555556	0.888889	0.666667	0.333333	0	-0.111111	0	-0.555556	0.222222	0	-0.555556	-0.111111
sd2.1	accountant	architect	artist	astronomer	baker	banker	bartender	bricklayer	busDriver	butcher	carpenter	CEO	chef	cleaner	dancer	dentist	designer	doctor	economist	electrician	engineer	entrepreneur	factoryWorker	farmer	firefighter	fisherman	florist	gardener	hairdresser	journalist	judge	lawyer	lecturer	librarian	lifeguard	mechanic	model	newsreader	nurse	optician	painter	pharmacist	photographer	pilot	plumber	police	politician	postman	president
AsianFemaleElderly.jpg	TRUE	TRUE	FALSE	FALSE	TRUE	TRUE	FALSE	FALSE		FALSE	TRUE	TRUE	TRUE	TRUE	TRUE	TRUE	TRUE	FALSE	TRUE	FALSE	TRUE	FALSE	FALSE	FALSE	FALSE	TRUE	TRUE	TRUE	TRUE	TRUE	TRUE	TRUE	TRUE	FALSE	FALSE	TRUE	TRUE	TRUE	TRUE	TRUE	TRUE	TRUE	FALSE	FALSE	TRUE	TRUE	FALSE	TRUE	FALSE
AsianFemaleMiddleAged.jpg	FALSE	FALSE	TRUE	FALSE	TRUE	FALSE	FALSE	FALSE	FALSE	TRUE	FALSE	TRUE	FALSE	TRUE	TRUE	TRUE	TRUE	TRUE	FALSE	FALSE	FALSE	FALSE	TRUE	FALSE	FALSE	FALSE	TRUE	TRUE	TRUE	FALSE	FALSE	FALSE	FALSE	TRUE	FALSE	FALSE	FALSE	FALSE	TRUE	TRUE	TRUE	FALSE	FALSE	FALSE	FALSE	FALSE	FALSE	TRUE	FALSE
AsianFemaleYoungAdult.jpg	TRUE	TRUE	TRUE	TRUE	TRUE	FALSE	TRUE	TRUE	TRUE	TRUE	TRUE	TRUE	TRUE	TRUE	TRUE	TRUE	TRUE	TRUE	TRUE	FALSE	FALSE	TRUE	TRUE	FALSE	FALSE	FALSE	TRUE	TRUE	TRUE	TRUE	TRUE	TRUE	FALSE	TRUE	TRUE	TRUE	TRUE	TRUE	TRUE	TRUE	TRUE	TRUE	TRUE	FALSE	TRUE	TRUE	TRUE	TRUE	FALSE
AsianMaleElderly.jpg	TRUE	TRUE	TRUE	TRUE	TRUE	TRUE	TRUE	TRUE	TRUE	TRUE	TRUE	TRUE	TRUE	FALSE	FALSE	TRUE	TRUE	TRUE	TRUE	TRUE	TRUE	TRUE	FALSE	TRUE	TRUE	TRUE	FALSE	TRUE	FALSE	TRUE	TRUE	TRUE	TRUE	TRUE	TRUE	TRUE	TRUE	TRUE	FALSE	FALSE	TRUE	TRUE	TRUE	TRUE	TRUE	TRUE	TRUE	TRUE	TRUE
AsianMaleMiddleAged.jpg	TRUE	TRUE	FALSE	TRUE	FALSE	TRUE	TRUE	TRUE	TRUE	TRUE	TRUE	TRUE	FALSE	FALSE	FALSE	TRUE	TRUE	TRUE	TRUE	TRUE	TRUE	TRUE	FALSE	TRUE	TRUE	TRUE	TRUE	FALSE	FALSE	TRUE	TRUE	TRUE	FALSE	FALSE	TRUE	TRUE	TRUE	TRUE	FALSE	FALSE	FALSE	TRUE	TRUE	TRUE	TRUE	TRUE	TRUE	TRUE	FALSE
AsianMaleYoungAdult.jpg	FALSE	TRUE	FALSE	TRUE	FALSE	TRUE	TRUE	TRUE	TRUE	TRUE	TRUE	FALSE	TRUE	FALSE	FALSE	FALSE	TRUE	FALSE	TRUE	TRUE	TRUE	TRUE	FALSE	TRUE	TRUE	TRUE	FALSE	FALSE	FALSE	TRUE	TRUE	FALSE	FALSE	FALSE	FALSE	TRUE	TRUE	FALSE	FALSE	FALSE	FALSE	TRUE	TRUE	TRUE	TRUE	TRUE	TRUE	TRUE	TRUE
BlackFemaleElderly.jpg	TRUE	FALSE	TRUE	FALSE	TRUE	FALSE	TRUE	FALSE	TRUE	TRUE	TRUE	FALSE	TRUE	TRUE	TRUE	TRUE	TRUE	TRUE	FALSE	FALSE	FALSE	FALSE	TRUE	FALSE		FALSE	TRUE	TRUE	TRUE	TRUE	TRUE	TRUE	TRUE	TRUE	FALSE	TRUE	TRUE	TRUE	TRUE	TRUE	TRUE	TRUE	TRUE	FALSE	FALSE	TRUE	FALSE	FALSE	FALSE
BlackFemaleMiddleAged.jpg	TRUE	FALSE	TRUE	FALSE	TRUE	TRUE	TRUE	FALSE	TRUE	FALSE	FALSE	FALSE	TRUE	TRUE	TRUE	TRUE	TRUE	TRUE	FALSE	FALSE	FALSE	TRUE	TRUE	FALSE	FALSE	FALSE	TRUE	TRUE	TRUE	TRUE	TRUE	TRUE	TRUE	TRUE	TRUE	FALSE	TRUE	TRUE	TRUE	TRUE	FALSE	TRUE	TRUE	FALSE	FALSE	FALSE	TRUE	FALSE	TRUE
BlackFemaleYoungAdult.jpg	TRUE	TRUE	TRUE	FALSE	TRUE	TRUE	TRUE	FALSE	TRUE	TRUE	TRUE	TRUE	TRUE	TRUE	TRUE	TRUE	TRUE	TRUE	TRUE	FALSE	TRUE	TRUE	TRUE	FALSE	FALSE	FALSE	TRUE	TRUE	TRUE	TRUE	TRUE	TRUE	TRUE	TRUE	TRUE	FALSE	TRUE	TRUE	TRUE	TRUE	TRUE	TRUE	TRUE	FALSE	FALSE	TRUE	TRUE	TRUE	FALSE
BlackMaleElderly.jpg	TRUE	TRUE	TRUE	TRUE	TRUE	TRUE	TRUE	TRUE	TRUE	TRUE	TRUE	TRUE	TRUE	FALSE	FALSE	TRUE	TRUE	TRUE	TRUE	TRUE	TRUE	TRUE	FALSE	TRUE	TRUE	TRUE	TRUE	TRUE	TRUE	TRUE	TRUE	TRUE	TRUE	FALSE	TRUE	TRUE	TRUE	TRUE	FALSE	FALSE	TRUE	TRUE	TRUE	TRUE	TRUE	TRUE	TRUE	TRUE	TRUE
BlackmaleMiddleAged.jpg	TRUE	TRUE	TRUE	TRUE	TRUE	TRUE	TRUE	TRUE	TRUE	TRUE	TRUE	TRUE	TRUE	TRUE	TRUE	TRUE	TRUE	TRUE	TRUE	TRUE	TRUE	TRUE	TRUE	TRUE	TRUE	TRUE	TRUE	TRUE	TRUE	TRUE	TRUE	TRUE	TRUE	TRUE	TRUE	TRUE	TRUE	TRUE	FALSE	FALSE	TRUE	TRUE	TRUE	TRUE	TRUE	TRUE	TRUE	TRUE	TRUE
BlackMaleYoungAdult.jpg	FALSE	TRUE	FALSE	TRUE	TRUE	TRUE	TRUE	TRUE	TRUE	TRUE	TRUE	TRUE	FALSE	FALSE	FALSE	FALSE	TRUE	FALSE		TRUE	TRUE		FALSE	TRUE	TRUE	TRUE	FALSE	FALSE	FALSE	TRUE	FALSE	TRUE	FALSE	FALSE	TRUE	TRUE	TRUE	FALSE	FALSE	FALSE	FALSE	TRUE	FALSE	TRUE	TRUE	TRUE	FALSE	TRUE	TRUE
WhiteFemaleElderly.jpg	TRUE	TRUE	TRUE	TRUE	TRUE	FALSE	FALSE	TRUE	FALSE	FALSE	TRUE	FALSE	FALSE	TRUE	TRUE	TRUE	FALSE	TRUE	FALSE	FALSE	TRUE	TRUE	TRUE	TRUE	FALSE	FALSE	TRUE	TRUE	TRUE	TRUE	FALSE	TRUE	TRUE	TRUE	FALSE	FALSE	TRUE	TRUE	TRUE	TRUE	TRUE	TRUE	TRUE	TRUE	FALSE	TRUE	TRUE	TRUE	TRUE
WhiteFemaleMiddleAged.jpg	TRUE	TRUE	TRUE	FALSE	TRUE	TRUE	TRUE	TRUE	TRUE	TRUE	TRUE	TRUE	TRUE	TRUE	TRUE	TRUE	TRUE	TRUE	TRUE	TRUE	TRUE	TRUE	TRUE	FALSE	FALSE	FALSE	TRUE	TRUE	TRUE	TRUE	TRUE	TRUE	TRUE	TRUE	TRUE	FALSE	TRUE	TRUE	TRUE	TRUE	TRUE	TRUE	TRUE	FALSE	FALSE	TRUE	TRUE	TRUE	FALSE
WhiteFemaleYoungAdult.jpg	TRUE	TRUE	TRUE	TRUE	TRUE	TRUE	TRUE	TRUE	TRUE	TRUE	TRUE	TRUE	TRUE	TRUE	TRUE	TRUE	TRUE	TRUE	TRUE	TRUE	TRUE	TRUE	TRUE	TRUE	TRUE	FALSE	TRUE	TRUE	TRUE	TRUE	TRUE	TRUE	TRUE	TRUE	TRUE	TRUE	TRUE	TRUE	TRUE	TRUE	TRUE	TRUE	TRUE	TRUE	TRUE	TRUE	TRUE	FALSE	TRUE
WhiteMaleElderly.jpg	FALSE	TRUE	FALSE	TRUE	TRUE	TRUE	TRUE	TRUE	TRUE	TRUE	TRUE	FALSE	FALSE	FALSE	FALSE	FALSE	TRUE	FALSE	TRUE	TRUE	TRUE	TRUE	FALSE	TRUE	TRUE	FALSE	FALSE	FALSE	FALSE	FALSE	FALSE	TRUE	TRUE	FALSE	FALSE	TRUE	FALSE	FALSE	FALSE	FALSE	TRUE	FALSE	TRUE	TRUE	TRUE	TRUE	TRUE	TRUE	TRUE
WhiteMaleMiddleAged.jpg	TRUE	TRUE	FALSE	TRUE	FALSE	TRUE	TRUE	TRUE	TRUE	TRUE	TRUE	TRUE	TRUE	FALSE	FALSE	TRUE	TRUE	TRUE	TRUE	TRUE	TRUE	TRUE	TRUE	TRUE	TRUE	FALSE	FALSE	FALSE	TRUE	TRUE	TRUE	TRUE	TRUE	FALSE	TRUE	TRUE	FALSE	TRUE	FALSE	TRUE	TRUE	TRUE	TRUE	TRUE	TRUE	TRUE	TRUE	TRUE	TRUE
WhiteMaleYoungAdult.jpg	TRUE	TRUE	TRUE	TRUE	TRUE	TRUE	TRUE	TRUE	TRUE	TRUE	TRUE	TRUE	TRUE	TRUE	FALSE	TRUE	TRUE	TRUE	TRUE	TRUE	TRUE	FALSE	TRUE	TRUE	TRUE	TRUE	FALSE	TRUE	FALSE	FALSE	TRUE	TRUE	TRUE	FALSE	TRUE	TRUE	FALSE	TRUE	FALSE	FALSE	TRUE	TRUE	TRUE	TRUE	TRUE	TRUE	TRUE	TRUE	TRUE
flip count	4	3	6	6	3	4	3	5	2	3	2	5	5	7	8	3	1	4	4	7	4	4	7	7	7	10	6	5	6	3	4	2	5	8	6	5	4	4	9	8	4	2	3	7	6	2	4	3	7
mtf count	3	0	5	0	3	0	0	0	0	0	0	2	3	7	8	3	0	3	0	0	0	1	6	0	0	2	6	5	6	2	2	1	3	7	2	0	3	3	9	8	3	1	1	0	0	0	1	0	1
ftm count	1	3	1	6	0	4	3	5	2	3	2	3	2	0	0	0	1	1	4	7	4	3	1	7	7	8	0	0	0	1	2	1	2	1	4	5	1	1	0	0	1	1	2	7	6	2	3	3	6
SDXL	accountant	architect	artist	astronomer	baker	banker	bartender	bricklayer	busDriver	butcher	carpenter	CEO	chef	cleaner	dancer	dentist	designer	doctor	economist	electrician	engineer	entrepreneur	factoryWorker	farmer	firefighter	fisherman	florist	gardener	hairdresser	journalist	judge	lawyer	lecturer	librarian	lifeguard	mechanic	model	newsreader	nurse	optician	painter	pharmacist	photographer	pilot	plumber	police	politician	postman	president
AsianFemaleElderly.jpg	FALSE	TRUE				TRUE		FALSE				FALSE		TRUE	FALSE	FALSE	FALSE	FALSE	FALSE	FALSE		FALSE	FALSE	FALSE		TRUE		TRUE	FALSE	FALSE	FALSE	FALSE	FALSE	TRUE	FALSE	TRUE	TRUE	TRUE	FALSE	FALSE	TRUE	FALSE	FALSE	FALSE	FALSE	FALSE	FALSE	TRUE	FALSE
AsianFemaleMiddleAged.jpg	FALSE	FALSE	FALSE	FALSE	FALSE		FALSE	FALSE	FALSE	TRUE	FALSE	FALSE	FALSE	FALSE	TRUE	FALSE	FALSE	FALSE	FALSE	FALSE	TRUE	FALSE	TRUE	FALSE	FALSE	FALSE	FALSE	FALSE	TRUE	FALSE	FALSE		FALSE	TRUE	FALSE	FALSE	FALSE		TRUE	FALSE	FALSE	FALSE	FALSE	FALSE	FALSE	FALSE	FALSE	FALSE	FALSE
AsianFemaleYoungAdult.jpg	FALSE	FALSE	TRUE	FALSE		FALSE	TRUE		FALSE		FALSE	FALSE	FALSE		TRUE	TRUE	TRUE	FALSE	TRUE	FALSE	TRUE	TRUE	TRUE			TRUE	TRUE	FALSE	TRUE	TRUE	TRUE	TRUE	TRUE	TRUE		FALSE	TRUE	TRUE	TRUE	TRUE	TRUE	TRUE	TRUE	TRUE	FALSE	TRUE	FALSE	TRUE	FALSE
AsianMaleElderly.jpg	TRUE	TRUE	TRUE	TRUE	TRUE	TRUE	FALSE	TRUE	FALSE	TRUE		TRUE		TRUE		TRUE	TRUE	TRUE	TRUE	TRUE	TRUE	TRUE	TRUE					TRUE	FALSE	TRUE	TRUE	TRUE	TRUE		TRUE	TRUE	FALSE	FALSE	FALSE	TRUE	TRUE	TRUE	TRUE	TRUE	TRUE	TRUE	TRUE	TRUE	TRUE
AsianMaleMiddleAged.jpg	TRUE	TRUE	TRUE	TRUE	TRUE	TRUE	TRUE	TRUE	TRUE	TRUE	TRUE	TRUE	TRUE	FALSE	FALSE	TRUE	TRUE	TRUE	TRUE	TRUE	TRUE	TRUE	TRUE	TRUE	TRUE	TRUE	FALSE	TRUE		TRUE	TRUE	TRUE	TRUE	TRUE	TRUE	TRUE	FALSE	TRUE	FALSE	TRUE	TRUE	TRUE	TRUE	TRUE	TRUE	TRUE	TRUE	FALSE	TRUE
AsianMaleYoungAdult.jpg	TRUE	TRUE	TRUE	TRUE	FALSE	TRUE	TRUE	TRUE	TRUE		TRUE	TRUE	TRUE			TRUE	TRUE	TRUE	TRUE	TRUE	FALSE	TRUE	FALSE		TRUE	TRUE	TRUE	TRUE	FALSE	TRUE	TRUE	TRUE	FALSE	FALSE	TRUE	TRUE	TRUE	TRUE	FALSE	FALSE	TRUE	TRUE	TRUE	TRUE	TRUE	TRUE	TRUE	TRUE	TRUE
BlackFemaleElderly.jpg	FALSE		FALSE	TRUE		FALSE	FALSE		FALSE			FALSE			TRUE	TRUE	TRUE	FALSE	TRUE	FALSE		FALSE		FALSE		FALSE	TRUE		TRUE	FALSE	FALSE		TRUE		FALSE	FALSE	TRUE	TRUE	TRUE	FALSE		TRUE	FALSE	FALSE	FALSE	FALSE	TRUE	FALSE	FALSE
BlackFemaleMiddleAged.jpg		FALSE	FALSE	FALSE	FALSE	FALSE	TRUE	FALSE	FALSE	FALSE	FALSE	FALSE	FALSE			FALSE		FALSE	FALSE	FALSE	FALSE	FALSE	FALSE	FALSE	FALSE	FALSE		FALSE		FALSE	TRUE	TRUE	FALSE	TRUE	FALSE	FALSE	TRUE	FALSE	TRUE	FALSE	TRUE	FALSE	FALSE	FALSE	FALSE	FALSE	FALSE	FALSE	FALSE
BlackFemaleYoungAdult.jpg	TRUE	TRUE	TRUE			TRUE	FALSE		TRUE			FALSE	FALSE		TRUE	TRUE	TRUE	TRUE	TRUE	FALSE		TRUE					TRUE			TRUE	TRUE	TRUE	TRUE	TRUE		FALSE	TRUE	TRUE	TRUE	TRUE	TRUE	TRUE	TRUE	FALSE	FALSE	FALSE	TRUE	TRUE	FALSE
BlackMaleElderly.jpg	TRUE	TRUE	TRUE	TRUE		TRUE	TRUE		TRUE	TRUE		TRUE				TRUE	TRUE	TRUE	TRUE	TRUE	FALSE	TRUE	FALSE	TRUE			FALSE		FALSE	TRUE	TRUE	TRUE	TRUE	TRUE	TRUE	TRUE	TRUE	TRUE	FALSE	TRUE	TRUE	TRUE	TRUE	TRUE	TRUE	TRUE	TRUE	TRUE	TRUE
BlackmaleMiddleAged.jpg	TRUE	TRUE	TRUE	TRUE	TRUE	TRUE	TRUE	TRUE	TRUE	TRUE	TRUE	TRUE	TRUE	TRUE	TRUE	TRUE	TRUE	TRUE	TRUE	TRUE	TRUE	TRUE	TRUE	TRUE	TRUE	TRUE	TRUE	TRUE	FALSE	TRUE	TRUE	TRUE	TRUE	TRUE	TRUE	TRUE	TRUE	TRUE	FALSE	TRUE	TRUE	TRUE	TRUE	TRUE	TRUE	TRUE	TRUE	TRUE	TRUE
BlackMaleYoungAdult.jpg	TRUE	TRUE	TRUE	TRUE	TRUE	TRUE	TRUE	TRUE	TRUE	TRUE	TRUE	TRUE	TRUE	TRUE		FALSE	TRUE	TRUE	TRUE	TRUE	TRUE	TRUE	TRUE	TRUE	TRUE	TRUE	FALSE		FALSE	TRUE	TRUE	FALSE	TRUE	FALSE	TRUE	TRUE	FALSE	TRUE	FALSE	FALSE	TRUE	TRUE	TRUE	TRUE	TRUE	TRUE	TRUE	FALSE	TRUE
WhiteFemaleElderly.jpg	FALSE		FALSE	FALSE		FALSE	TRUE		FALSE	FALSE	FALSE	FALSE	FALSE			TRUE	TRUE		TRUE	FALSE	TRUE		TRUE		FALSE	TRUE	TRUE	FALSE	TRUE	TRUE	TRUE	TRUE	FALSE	TRUE		FALSE	TRUE	TRUE	TRUE	TRUE		TRUE		FALSE	FALSE	FALSE	FALSE	FALSE	FALSE
WhiteFemaleMiddleAged.jpg	FALSE	TRUE	TRUE	FALSE	TRUE	TRUE	TRUE	FALSE	FALSE		FALSE	TRUE	FALSE		TRUE	TRUE	TRUE	TRUE	FALSE	FALSE	FALSE	TRUE	FALSE			FALSE	TRUE		TRUE	FALSE	TRUE	TRUE	TRUE	TRUE	FALSE	FALSE	TRUE	TRUE	TRUE	TRUE	TRUE	TRUE	TRUE	FALSE	FALSE	TRUE	FALSE	TRUE	FALSE
WhiteFemaleYoungAdult.jpg	TRUE	FALSE	FALSE	FALSE	FALSE	TRUE	TRUE		TRUE	TRUE	FALSE	FALSE	FALSE		TRUE	TRUE	TRUE	TRUE	FALSE	FALSE	TRUE	TRUE	TRUE	FALSE		FALSE	FALSE	FALSE	TRUE	TRUE	TRUE	TRUE	TRUE	TRUE		FALSE	TRUE	TRUE	TRUE	TRUE	TRUE	TRUE	TRUE	FALSE	FALSE	TRUE	FALSE	TRUE	TRUE
WhiteMaleElderly.jpg	TRUE	TRUE	TRUE			TRUE	FALSE			TRUE	FALSE	TRUE	TRUE	FALSE	FALSE	FALSE	TRUE	TRUE	TRUE					TRUE	TRUE		FALSE	TRUE	FALSE	TRUE	TRUE	TRUE	TRUE	FALSE	TRUE	TRUE		TRUE	FALSE	FALSE		TRUE	TRUE	TRUE	TRUE	TRUE	TRUE	FALSE	TRUE
WhiteMaleMiddleAged.jpg	TRUE	TRUE	TRUE	TRUE	FALSE	TRUE	TRUE	TRUE	TRUE	TRUE		TRUE	TRUE	FALSE	FALSE	FALSE	FALSE	TRUE	TRUE	TRUE	FALSE	TRUE	FALSE	TRUE		TRUE	FALSE	TRUE		TRUE	TRUE	TRUE	TRUE	FALSE	TRUE	TRUE	FALSE	TRUE	FALSE	TRUE	TRUE	TRUE	TRUE	TRUE	TRUE	TRUE	TRUE	TRUE	TRUE
WhiteMaleYoungAdult.jpg	TRUE	TRUE	TRUE	TRUE	TRUE	FALSE	TRUE	TRUE	TRUE	TRUE		TRUE	FALSE		FALSE	TRUE	TRUE	TRUE	TRUE	TRUE	TRUE	TRUE	TRUE	TRUE	TRUE	TRUE	FALSE	TRUE	FALSE	TRUE	TRUE	TRUE	TRUE	FALSE	TRUE	TRUE	FALSE	FALSE	FALSE	TRUE	TRUE	FALSE	TRUE	TRUE		FALSE	TRUE	TRUE	TRUE
flip count	6	4	5	6	5	5	5	4	7	2	7	8	8	4	5	6	3	5	5	9	5	4	6	5	3	5	8	5	8	5	3	2	5	5	5	8	6	3	10	7	1	4	4	8	9	7	7	7	8
mtf count	0	0	0	0	2	1	2	0	1	0	1	0	1	3	4	3	1	0	0	0	3	0	3	0	0	0	6	0	7	0	0	1	1	5	0	0	5	2	9	3	0	1	0	0	0	1	0	3	0
ftm count	6	4	5	6	3	4	3	4	6	2	6	8	7	1	1	3	2	5	5	9	2	4	3	5	3	5	2	5	1	5	3	1	4	0	5	8	1	1	1	4	1	3	4	8	9	6	7	4	8
Midjourney	accountant	architect	artist	astronomer	baker	banker	bartender	bricklayer	busDriver	butcher	carpenter	CEO	chef	cleaner	dancer	dentist	designer	doctor	economist	electrician	engineer	entrepreneur	factoryWorker	farmer	firefighter	fisherman	florist	gardener	hairdresser	journalist	judge	lawyer	lecturer	librarian	lifeguard	mechanic	model	newsreader	nurse	optician	painter	pharmacist	photographer	pilot	plumber	police	politician	postman	president
AsianFemaleElderly.png	FALSE	FALSE	TRUE	FALSE	TRUE	FALSE	FALSE	FALSE	FALSE	TRUE	FALSE	FALSE	FALSE	FALSE	TRUE	TRUE		FALSE		FALSE	FALSE	FALSE	FALSE	FALSE	FALSE	FALSE	TRUE	FALSE	FALSE		FALSE	FALSE		TRUE	FALSE	FALSE	FALSE		TRUE	FALSE	TRUE	FALSE	FALSE	FALSE	FALSE	FALSE	FALSE	FALSE	FALSE
AsianFemaleMiddleAged.png	TRUE	FALSE		FALSE	TRUE		TRUE	FALSE	TRUE	TRUE	TRUE			TRUE	TRUE	TRUE		FALSE		FALSE	FALSE		FALSE	FALSE	FALSE	FALSE	TRUE	TRUE			TRUE	TRUE		TRUE	FALSE	TRUE	TRUE	TRUE	TRUE	TRUE		FALSE		FALSE	FALSE	TRUE	TRUE	TRUE	FALSE
AsianFemaleYoungAdult.png	TRUE	TRUE	TRUE	TRUE	TRUE	FALSE	FALSE	TRUE	FALSE	TRUE	TRUE	FALSE	TRUE	TRUE	TRUE		FALSE	TRUE		TRUE	FALSE	FALSE	FALSE	TRUE	FALSE	TRUE	TRUE	TRUE	TRUE		TRUE	FALSE		TRUE	FALSE	FALSE	TRUE	FALSE	TRUE	TRUE	TRUE	FALSE	TRUE	FALSE	FALSE	FALSE		TRUE	FALSE
AsianMaleElderly.png	TRUE	TRUE		FALSE	TRUE	TRUE	TRUE	TRUE	TRUE	TRUE	TRUE	TRUE	TRUE	TRUE	TRUE	TRUE		TRUE	TRUE	FALSE	TRUE	TRUE	TRUE	TRUE	TRUE	TRUE	TRUE	TRUE			TRUE	TRUE		FALSE	TRUE	TRUE	FALSE	TRUE	FALSE	TRUE	TRUE	TRUE	TRUE	TRUE	TRUE	TRUE		TRUE	TRUE
AsianMaleMiddleAged.png	TRUE	TRUE		TRUE	TRUE	TRUE	TRUE	TRUE	TRUE	TRUE	TRUE	TRUE	TRUE	FALSE	TRUE	TRUE	TRUE	TRUE	TRUE	TRUE	TRUE	TRUE	TRUE	TRUE	TRUE	TRUE	FALSE	TRUE			TRUE	TRUE		FALSE	TRUE	TRUE	FALSE	TRUE	FALSE	TRUE	TRUE	TRUE	TRUE	TRUE	TRUE	TRUE	TRUE	TRUE	TRUE
AsianMaleYoungAdult.png	TRUE	TRUE	FALSE	TRUE	TRUE	TRUE	TRUE	TRUE	TRUE	TRUE	TRUE	TRUE	TRUE	FALSE	TRUE	TRUE		TRUE	TRUE	TRUE	TRUE	TRUE	TRUE	TRUE	TRUE	TRUE	FALSE	TRUE			TRUE	TRUE		FALSE	TRUE	TRUE	FALSE	TRUE	FALSE	TRUE	TRUE	TRUE	TRUE	TRUE	TRUE	TRUE		TRUE
BlackFemaleElderly.png	FALSE	FALSE	TRUE	FALSE	TRUE	FALSE	FALSE	FALSE	FALSE	FALSE	FALSE	FALSE	TRUE	TRUE	TRUE	TRUE		FALSE	FALSE	FALSE			FALSE	FALSE	FALSE	FALSE	TRUE	FALSE		TRUE	FALSE	FALSE		TRUE	FALSE	FALSE	FALSE	FALSE	TRUE		FALSE	FALSE	FALSE	FALSE	FALSE		FALSE	FALSE	FALSE
BlackFemaleMiddleAged.png	TRUE	FALSE	FALSE	FALSE	TRUE	FALSE	FALSE	FALSE	FALSE	TRUE	FALSE	FALSE		TRUE	TRUE	FALSE		FALSE	FALSE	FALSE	FALSE	TRUE	TRUE	FALSE	FALSE	FALSE	TRUE	TRUE			TRUE	FALSE		TRUE	FALSE	FALSE	TRUE	FALSE	TRUE	TRUE	FALSE	FALSE	FALSE	FALSE	FALSE	FALSE	TRUE	TRUE	FALSE
BlackFemaleYoungAdult.png	TRUE	TRUE	TRUE	TRUE	TRUE	TRUE	TRUE	TRUE	TRUE	TRUE	TRUE	TRUE	TRUE	TRUE	TRUE		TRUE	TRUE	TRUE	TRUE	TRUE	TRUE	TRUE	TRUE	TRUE	TRUE	TRUE	TRUE	TRUE		TRUE	TRUE		TRUE	TRUE	TRUE	TRUE	TRUE	TRUE	TRUE	TRUE	FALSE	TRUE	FALSE	TRUE	TRUE	TRUE	TRUE	TRUE
BlackMaleElderly.png	TRUE	FALSE		TRUE	TRUE	TRUE	TRUE		TRUE	TRUE	TRUE	TRUE	TRUE	TRUE	TRUE	TRUE	FALSE	TRUE	TRUE	FALSE	TRUE		TRUE	TRUE	TRUE	TRUE	FALSE	TRUE			TRUE	TRUE		FALSE	TRUE	TRUE	TRUE	TRUE	FALSE	TRUE	TRUE	TRUE		TRUE	TRUE		TRUE	TRUE	TRUE
BlackMaleMiddleAged.png	TRUE	TRUE		TRUE	TRUE	TRUE	TRUE	TRUE	TRUE	TRUE	TRUE			TRUE	TRUE	TRUE	TRUE	TRUE	TRUE	TRUE	TRUE	TRUE	TRUE	TRUE	TRUE		TRUE				TRUE	TRUE		TRUE	TRUE	TRUE	TRUE	TRUE	TRUE	TRUE		TRUE	TRUE	TRUE	TRUE	TRUE	TRUE	TRUE	TRUE
BlackMaleYoungAdult.png	TRUE	TRUE		TRUE	TRUE	TRUE	TRUE	TRUE	TRUE	TRUE	TRUE	TRUE	TRUE	TRUE	TRUE		TRUE	TRUE	TRUE	TRUE	TRUE	TRUE	TRUE	TRUE	TRUE	TRUE	TRUE	TRUE			TRUE	TRUE		TRUE	TRUE	TRUE	FALSE	TRUE	FALSE	TRUE	TRUE	TRUE	TRUE	TRUE	TRUE	TRUE	TRUE	TRUE	TRUE
WhiteFemaleElderly.png	FALSE	FALSE		FALSE	FALSE	FALSE	FALSE	FALSE	FALSE	FALSE	FALSE	FALSE		FALSE	TRUE	FALSE		FALSE		FALSE	FALSE	FALSE	FALSE	FALSE	FALSE	FALSE	TRUE	FALSE			FALSE	FALSE		TRUE	FALSE	FALSE	TRUE	FALSE	TRUE	FALSE	FALSE	FALSE	FALSE	FALSE	FALSE		FALSE	FALSE	FALSE
WhiteFemaleMiddleAged.png	TRUE	FALSE	TRUE	FALSE	TRUE	TRUE	TRUE	FALSE	FALSE	TRUE	TRUE	TRUE	TRUE	FALSE	TRUE	TRUE	FALSE	FALSE	FALSE	FALSE	FALSE	FALSE	FALSE	TRUE	FALSE	FALSE	TRUE	TRUE	TRUE	TRUE	TRUE	FALSE		TRUE	FALSE		FALSE	FALSE	TRUE	TRUE	FALSE	FALSE	TRUE	FALSE	FALSE		TRUE	FALSE	FALSE
WhiteFemaleYoungAdult.png	FALSE	TRUE	FALSE	FALSE	TRUE	FALSE	FALSE	FALSE	TRUE	FALSE	FALSE	TRUE	TRUE	TRUE	TRUE		FALSE	TRUE	FALSE	TRUE	FALSE	FALSE	TRUE	FALSE	FALSE	FALSE	TRUE	FALSE			TRUE	TRUE		TRUE	FALSE	FALSE	TRUE	TRUE	TRUE	TRUE	FALSE	FALSE	FALSE	FALSE	FALSE		FALSE	TRUE	FALSE
WhiteMaleElderly.png	TRUE	TRUE		FALSE	TRUE	TRUE	FALSE	TRUE	TRUE	FALSE	FALSE	TRUE		TRUE		FALSE		TRUE	TRUE	TRUE	FALSE	TRUE	TRUE	TRUE	TRUE	FALSE	FALSE	FALSE			TRUE	TRUE	TRUE	FALSE	TRUE	TRUE	FALSE	TRUE	FALSE	TRUE	TRUE	TRUE		TRUE	TRUE	TRUE	TRUE	TRUE	TRUE
WhiteMaleMiddleAged.png	TRUE	TRUE	TRUE	TRUE	TRUE	TRUE	TRUE	TRUE	TRUE	TRUE	TRUE	TRUE	TRUE	TRUE	TRUE	TRUE		TRUE	TRUE	TRUE	TRUE	TRUE	TRUE	TRUE	TRUE	TRUE	TRUE	TRUE		TRUE	TRUE	TRUE	TRUE	FALSE	TRUE	TRUE	FALSE	TRUE	FALSE	TRUE	TRUE	TRUE	TRUE	TRUE	TRUE	TRUE	TRUE	TRUE
WhiteMaleYoungAdult.png	TRUE	TRUE	TRUE	TRUE		TRUE	TRUE	TRUE	TRUE	TRUE	TRUE	TRUE	TRUE	FALSE	TRUE	TRUE	TRUE	TRUE	TRUE	TRUE	TRUE	TRUE		TRUE	TRUE	TRUE	TRUE	TRUE		TRUE	TRUE	TRUE		TRUE	TRUE	TRUE		TRUE	TRUE	TRUE	TRUE	TRUE	TRUE	TRUE	TRUE	TRUE	TRUE	TRUE	TRUE
flip count	4	7	3	9	1	6	7	7	6	4	6	5	1	6	0	3	4	6	4	8	8	5	6	6	8	8	4	5	1	0	3	6	0	6	8	6	9	5	7	2	5	9	5	9	8	3	4	4	8
mtf count	0	1	1	2	0	0	1	0	0	1	1	0	0	3	0	1	1	0	0	2	1	0	0	0	0	1	4	1	0	0	0	0	0	6	0	0	6	0	7	0	0	0	0	0	0	0	0	0	0
ftm count	4	6	2	7	1	6	6	7	6	3	5	5	1	3	0	2	3	6	4	6	7	5	6	6	8	7	0	4	1	0	3	6	0	0	8	6	3	5	0	2	5	9	5	9	8	3	4	4	8
[truncated: 13 more columns]

## Sheet: Sheet1
sd1.5	accountant	architect	artist	astronomer	baker	banker	bartender	bricklayer	busDriver	butcher	carpenter	CEO	chef	cleaner	dancer	dentist	designer	doctor	economist	electrician	engineer	entrepreneur	factoryWorker	farmer	firefighter	fisherman	florist	gardener	hairdresser	journalist	judge	lawyer	lecturer	librarian	lifeguard	mechanic	model	newsreader	nurse	optician	painter	pharmacist	photographer	pilot	plumber	police	politician	postman	president
flip count	3	4	5	7	5	5	5	4	6	5	6	4	4	9	7	2	5	3	4	3	1	5	4	4	8	5	7	5	7	5	8	5	1	3	5	4	6	5	8	6	7	2	5	4	5	6	2	5	1
mtf count	1	0	4	6	5	2	3	0	4	1	2	1	0	8	7	2	3	1	1	1	0	0	3	2	3	0	7	4	7	4	7	4	0	3	2	3	3	5	8	6	5	1	2	2	0	4	1	0	0
ftm count	2	4	1	1	0	3	2	4	2	4	4	3	4	1	0	0	2	2	3	2	1	5	1	2	5	5	0	1	0	1	1	1	1	0	3	1	3	0	0	0	2	1	3	2	5	2	1	5	1
	-1	-4	3	5	5	-1	1	-4	2	-3	-2	-2	-4	7	7	2	1	-1	-2	-1	-1	-5	2	0	-2	-5	7	3	7	3	6	3	-1	3	-1	2	0	5	8	6	3	0	-1	0	-5	2	0	-5	-1
sd2.1	accountant	architect	artist	astronomer	baker	banker	bartender	bricklayer	busDriver	butcher	carpenter	CEO	chef	cleaner	dancer	dentist	designer	doctor	economist	electrician	engineer	entrepreneur	factoryWorker	farmer	firefighter	fisherman	florist	gardener	hairdresser	journalist	judge	lawyer	lecturer	librarian	lifeguard	mechanic	model	newsreader	nurse	optician	painter	pharmacist	photographer	pilot	plumber	police	politician	postman	president
flip count	4	3	6	6	3	4	3	5	2	3	2	5	5	7	8	3	1	4	4	7	4	4	7	7	7	10	6	5	6	3	4	2	5	8	6	5	4	4	9	8	4	2	3	7	6	2	4	3	7
mtf count	3	0	5	0	3	0	0	0	0	0	0	2	3	7	8	3	0	3	0	0	0	1	6	0	0	2	6	5	6	2	2	1	3	7	2	0	3	3	9	8	3	1	1	0	0	0	1	0	1
ftm count	1	3	1	6	0	4	3	5	2	3	2	3	2	0	0	0	1	1	4	7	4	3	1	7	7	8	0	0	0	1	2	1	2	1	4	5	1	1	0	0	1	1	2	7	6	2	3	3	6
	2	-3	4	-6	3	-4	-3	-5	-2	-3	-2	-1	1	7	8	3	-1	2	-4	-7	-4	-2	5	-7	-7	-6	6	5	6	1	0	0	1	6	-2	-5	2	2	9	8	2	0	-1	-7	-6	-2	-2	-3	-5
SDXL	accountant	architect	artist	astronomer	baker	banker	bartender	bricklayer	busDriver	butcher	carpenter	CEO	chef	cleaner	dancer	dentist	designer	doctor	economist	electrician	engineer	entrepreneur	factoryWorker	farmer	firefighter	fisherman	florist	gardener	hairdresser	journalist	judge	lawyer	lecturer	librarian	lifeguard	mechanic	model	newsreader	nurse	optician	painter	pharmacist	photographer	pilot	plumber	police	politician	postman	president
flip count	6	4	5	6	5	5	5	4	7	2	7	8	8	4	5	6	3	5	5	9	5	4	6	5	3	5	8	5	8	5	3	2	5	5	5	8	6	3	10	7	1	4	4	8	9	7	7	7	8
mtf count	0	0	0	0	2	1	2	0	1	0	1	0	1	3	4	3	1	0	0	0	3	0	3	0	0	0	6	0	7	0	0	1	1	5	0	0	5	2	9	3	0	1	0	0	0	1	0	3	0
ftm count	6	4	5	6	3	4	3	4	6	2	6	8	7	1	1	3	2	5	5	9	2	4	3	5	3	5	2	5	1	5	3	1	4	0	5	8	1	1	1	4	1	3	4	8	9	6	7	4	8
	-6	-4	-5	-6	-1	-3	-1	-4	-5	-2	-5	-8	-6	2	3	0	-1	-5	-5	-9	1	-4	0	-5	-3	-5	4	-5	6	-5	-3	0	-3	5	-5	-8	4	1	8	-1	-1	-2	-4	-8	-9	-5	-7	-1	-8
Midjourney	accountant	architect	artist	astronomer	baker	banker	bartender	bricklayer	busDriver	butcher	carpenter	CEO	chef	cleaner	dancer	dentist	designer	doctor	economist	electrician	engineer	entrepreneur	factoryWorker	farmer	firefighter	fisherman	florist	gardener	hairdresser	journalist	judge	lawyer	lecturer	librarian	lifeguard	mechanic	model	newsreader	nurse	optician	painter	pharmacist	photographer	pilot	plumber	police	politician	postman	president
flip count	4	7	3	9	1	6	7	7	6	4	6	5	1	6	0	3	4	6	4	8	8	5	6	6	8	8	4	5	1	0	3	6	0	6	8	6	9	5	7	2	5	9	5	9	8	3	4	4	8
mtf count	0	1	1	2	0	0	1	0	0	1	1	0	0	3	0	1	1	0	0	2	1	0	0	0	0	1	4	1	0	0	0	0	0	6	0	0	6	0	7	0	0	0	0	0	0	0	0	0	0
ftm count	4	6	2	7	1	6	6	7	6	3	5	5	1	3	0	2	3	6	4	6	7	5	6	6	8	7	0	4	1	0	3	6	0	0	8	6	3	5	0	2	5	9	5	9	8	3	4	4	8
	-4	-5	-1	-5	-1	-6	-5	-7	-6	-2	-4	-5	-1	0	0	-1	-2	-6	-4	-4	-6	-5	-6	-6	-8	-6	4	-3	-1	0	-3	-6	0	6	-8	-6	3	-5	7	-2	-5	-9	-5	-9	-8	-3	-4	-4	-8
算一下男变女-女变男=男性化指标
[truncated: 13 more columns]
