# Supplementary material
Source: ML conference proceedings conference paper supplement (https://openreview.net/forum?id=P66QvdCPjE)
Supplement: supplementary_material [file result_race_behavior.xlsx]

## Sheet: result_race_behavior
sd1.5	bathing	bowing	buying	clapping	climbing	cooking	crawling	crying	dancing	digging	diving	dreaming	drinking	eating	fighting	giving	hugging	jumping	kissing	knitting	laughing	listening	painting	playing	reading	riding	sewing	singing	sitting	skiing	sleeping	smelling	snoring	standing	talking	thinking	waiting	washing	writing
AsianFemaleElderly.png	127.04		147.725		125.257	104.433	122.167	107.152	123.064	142.255			144.53		117.901	153.321	142.113	125.318		143.524	156.126	125.814	139.2	125.848			118.058	139.843	127.896	123.04	137.284		168.488	139.723	131.419	146.914	134.559	137.34	139.978
AsianFemaleMiddleAged.png	162.887	139.957	148.748	132.506	158.192	134.575	135.091	146.3	141.789	146.239	168.869	107.145	126.427	137.602	139.664	161.458	140.009	154.709	139.972	167.802	138.106	144.457	134.678	112.853	135.192	126.987	139.885	146.873	136.756	127.771	136.88	146.656	168.533	141.086	142.852	142.157	148.395	129.876	136.274
AsianFemaleYoungAdult.png	170.334		173.768	165.284	173.993	159.49	163.299	160.57	143.294	169.368	182.857	159.725	175.645	145.758	163.85	166.47	163.056	171.777	164.479	176.611	162.436	173.101	177.417	138.947	150.877	150.548	160.094	144.245	171.112	144.131	147.299		182.502	164.814	156.425	172.964	155.341	155.29	165.205
AsianMaleElderly.png	148.109	127.035	140.748	126.978	156.514	123.683	120.557	132.48	144.985	131.516	127.913	114.687	126.429	143.118	107.345	143.383	139.34	143.535	117.801	152.769	144.609	140.066	128.793	127.926	130.391	130.227	107.597	153.195	121.864	133.232	130.371	149.201	128.938	135.852	128.849	138.944	136.333	127.963	140.764
AsianMaleMiddleAged.png	140.695	118.825	126.448	115.339	143.882	129.967	164.423	121.651	132.211	129.608	120.478	116.387	131.345	147.151	114.318	131.15	137.7	139.949	108.862	144.216	145.283	144.878	119.377	137.937	142.101	129.376	110.126	133.3		130.416	125.295	152.836	132.098	139.571	122.702	131.409	108.192	126.6	135.311
AsianMaleYoungAdult.png	128.368		104.458	120.11	118.142	110.46	108.952	109.42	107.454	113.148	122.002	92.0253	96.8836	118.43	108.887	122.154	131.562	125.875	89.1359	124.085	116.339	100.55	109.561	94.6118	111.672	111.261	85.4846	109.653	118.391	102.07	90.0515	110.746	135.164	117.511	123.24	120.777	112.672	127.059	104.869
BlackFemaleElderly.png	119.854		107.009	101.768	108.577	102.976	120.006	104.354	111.945	126.061		119.919		120.21	94.9347	122.161	110.42	95.4211	100.044	107.857	117.773	109.829	105.592	109.475			94.922		104.893	118.273	119.297	138.772	114.645	148.496	114.92	133.9	123.91	127.028
BlackFemaleMiddleAged.png	102.993		85.2509	89.6109	91.353	92.6366	88.9579	78.3512	88.2824	93.1129	97.2051	77.4379	88.2319	83.9485	86.0677	94.2548	105.522	106.93		104.29	100.789	90.4345	93.3135	70.088	99.4568	79.6124	59.7097	95.0867	86.5661	93.6337	85.058	98.8645	117.865	83.5951	91.114	100.102	93.6291	109.463	99.1528
BlackFemaleYoungAdult.png	143.932	129.336	130.853	117.199	132.149	122.567	120.953	133.561	134.708	142.645	119.311	112.807	122.023	132.41	114.789	138.479	146.767	126.585	124.371	133.251	131.883	126.807	140.33	120.761	133.076	122.658	107.032	126.712	126.849	137.267	115.963	137.094	152.208	138.84	128.339	139.105	126.969	140.943	125.531
BlackMaleElderly.png	154.339		116.914	103.341	138.025	118.021	113.022	122.711	128.495	126.698	115.946	108.731	117.51	128.122	102.465	141.626	125.19	127.88	102.975	120.634	124.394	132.74	126.094	97.5875	105.046	106.924	87.7827	116.835	105.055	112.104	114.202	127.82	126.751	122.665	118.622	119.807	131.907	126.061	110.679
BlackmaleMiddleAged.png	116.858	96.0679	101.257	93.4157	118.928	95.8866	98.6639	89.1539	93.308	103.549	94.2466	95.492	96.6439	100.237	93.7661	112.418	106.913	109.021	88.0441	105.166	102.775	95.4603	95.0875	82.4082	95.616	94.8061	71.9697	96.8759	92.2425	112.936	84.5904	101.507	108.739	114.649	102.998	101.433	87.6226	97.8972	93.995
BlackMaleYoungAdult.png	102.139	73.3969	92.5563	95.397	119.576	96.8477	92.6144	96.1676	77.7713	95.6481	76.0749	77.3548	80.3004	102.948	82.1336	108.372	109.769	103.52	65.894	106.101	102.684	98.1782	78.2939	76.3408	101.583	95.594	65.5131	101.136	83.6609		80.6315	88.5147	112.472	107.367	104.991	96.5863	79.3458	86.4274	89.5156
WhiteFemaleElderly.png	163.895		141.894	131.082	161.761	145.734	153.302	152.51	146.037	159.471	157.08	143.655	139.477	156.111	130.996	158.169	126.61	142.622	131.27	162.495	168.135	166.2	147.493	147.44		150.381		144.491	147.893	162.102	157.777	154.958	132.72	150.176	149.526	150.977	160.444	156.497	141.825
WhiteFemaleMiddleAged.png	162.69	147.245	155.224	134.987	155.601	123.036	146.929	143.458	155.416	143.193	151.017	152.82	129.915	135.904	149.591	164.871	152.282	167.31	141.726	170.57	130.332	169.742	154.496	147.13	150.187	146.6	145.852	154.883	167.361	159.147	139.712	166.042	158.319	149.505	154.669	151.556	145.5	150.581	143.902
WhiteFemaleYoungAdult.png	172.852	144.045	153.939	154.453	153.109	134.368	151.239	147.741	149.215	163.683	148.31	155.065	146.83	144.908	138.301	161.173	169.369	153.933	149.659	162.475	163.045	163.523	162.296	157.648	144.028	146.019	136.308	150.438	149.763	157.603	150.79	172.296	138.338	171.378	148.206	167.523	155.043	170.415	163.872
WhiteMaleElderly.png	166.009	166.846	144.819	159.317	180.321	132.003	155.351	150.279	171.388	156.64	170.935	144.562			164.224		167.301	127.602		179.521	152.841	170.895		157.787	155.015	159.536	151.647		153.074	142.448	151.906	182.453	156.909	157.013	159.452		155.462	150.522	161.165
WhiteMaleMiddleAged.png	150.2	121.988	132.273		126.887	124.64	116.543	123.084	131.692	135.797		117.127	127.137	118.948	108.111	147.826	124.293	129.52	103.772	113.954	125.566	129.62	121.335	111.458	122.157	113.829	102.183	135.226	125.745	130.12	121.052	124.876	121.251	127.553	130	131.055	125.252	123.001	123.637
WhiteMaleYoungAdult.png	170.751	165.992	153.151	154.257	155.582	141.429	161.797	140.844	152.96	152.424	152.377	140.351	134.12	166.773	152.62	163.063	160.835	160.535	144.646	169.921	162.55	161.243	150.194	151.786	161.948	150.956	134.96	158.009	143.415	156.609	149.863	164.428	161.308	159.022	158.327	158.975	157.732	164.932	163.402
sd2.1	bathing	bowing	buying	clapping	climbing	cooking	crawling	crying	dancing	digging	diving	dreaming	drinking	eating	fighting	giving	hugging	jumping	kissing	knitting	laughing	listening	painting	playing	reading	riding	sewing	singing	sitting	skiing	sleeping	smelling	snoring	standing	talking	thinking	waiting	washing	writing
AsianFemaleElderly.png	118.245	102.272		107.574	136.486	101.038	113.44	114.207				117.393	86.3802		131.418	139.087	137.515	114.989	117.188	126.868	119.896		125.838	129.166	98.7129		128.214	109.526	104.043					119.02	109.039	109.274		101.07	112.132
AsianFemaleMiddleAged.png	103.051		126.29	101.333	115.378	129.928		93.8669	85.1909	102.3		119.524	142.385	102.536	92.5378		117.514				179.166	116.063	152.552	123.446		90.9848	136.475	112.366	77.5699	135.119	114.367	110.517	116.7	94.5009	104.998			116.105	113.441
AsianFemaleYoungAdult.png		103.744	190.588	66.8944		158.58		119.484	110.231	100.788	128.196	144.702			95.2277		157.051	132.846	82.478		187.196	142.236	181.351	157.217	123.294	150.868	127.949	131.724		151.155	150.835	146.39	129.734	130.284	83.6043			147.522	137.194
AsianMaleElderly.png		109.985	134.988	127.779	128.098		105.649	96.9261		103.03	131.61	109.345	134.61	103.35	123.501	141.44		68.0665	114.033	113.516	163.745	137.153	135.691	83.7056	112.586	147.441	113.869	87.4873	119.113	127.236	112.142	90.2832	99.2069	120.102	112.468	101.921	80.694	106.928	93.6725
AsianMaleMiddleAged.png	112.601	74.8159	133.372	136.651	131.565	130.075	108.862	109.203	123.718	109.206			92.5363	121.327	111.914	120.422	144.173	120.949	115.854		152.778	135.104	147.58	119.647	92.9028	122.518	74.393	141.117	126.841	90.735	79.0383	106.64	100.403	127.015	133.11	117.152	85.6238	88.959	127.24
AsianMaleYoungAdult.png	139.639		122.78	109.563	98.2227	100.092	99.6492	84.5924	94.099		115.601			144.597	82.9186	131.426	131.184				126.248	99.6787	93.1708			129.682	93.5629		109.561		125.626	85.9664	109.32		104.838		107.815	104.051	122.953
BlackFemaleElderly.png	96.1125	75.4143	116.776	100.602		84.3905		83.9896	87.0606		98.3161	89.6299			87.1801	100.419					137.055		108.453		71.3631	112.679			57.8619	85.7711	113.312	83.1234			125.232			77.8216	85.1256
BlackFemaleMiddleAged.png	90.9018	83.123	81.1154	92.8483	83.9606	77.1382	96.3196	79.1504	65.9669	83.6894	78.9342	94.7184	76.0127	103.794	77.7801		86.6913	60.4555	72.0665	73.3149	101.007	96.643	89.6783	72.9067	88.0554	88.4616	88.9582	87.3192	75.953		87.9927	76.0608	69.6892	98.3373	80.5587		70.0864	68.2033	93.0593
BlackFemaleYoungAdult.png	111.266		130.844	121.728	111.091	108.338	112.382	65.4677	109.296	111.768	101.993	124.065	125.3		104.375		117.951	133.665	80.9305		157.957	146.749		122.962	95.3804	141.462	84.3222	111.51	113.976	137.707	113.402	121.295	106.217	140.955	139.563	127.929		111.588	108.498
BlackMaleElderly.png	103.566	102.615	108.738	104.006	118.463	94.9087	107.291	86.5823	95.4749	77.1163	114.945	72.1763	103.424	126.695	84.232	116.645	105.516	75.4971	77.2094		127.934	125.35	92.4941	115.629	99.9894		80.1136		95.7982		92.4806	91.5668	107.33	106.723	75.3308	91.0716	95.3307	83.5615	127.51
BlackmaleMiddleAged.png	98.3447	67.4978	120.058	97.087	115.035	97.6594	90.8175	94.5499	89.7736	94.9883	107.623	98.143	105.276	104.244	109.382	99.8584	106.661	86.2892	80.7066	89.2829	123.681	98.4559	90.1451		90.7866	113.823	93.4498	101.376	87.7188		77.7823	88.3357	99.1435	112.695	80.423	73.1222	73.2373	96.8368	93.6915
BlackMaleYoungAdult.png	92.0671	77.2525	99.7728	88.5147		93.9959	116.31	93.6732	81.0088	99.4965	93.4578	101.331	99.364	102.983	94.2784		109.188		96.1559		110.271	93.0803	86.5331	98.2888	93.5936	93.6626			82.1204		97.2709	99.2781	89.8061		115.391		72.134	71.5866	120.168
WhiteFemaleElderly.png	142.33		135.545			134.088	115.859	103.037	141.456	123.619	133.879			211.518	120.548	145.44					177.652	138.181	144.118	154.125	125.639	113.266			131.926		151.589	136.365		135.968	122.382			116.219	126.515
WhiteFemaleMiddleAged.png		98.1276		135.408	115.931	148.883	144.755	104.595	116.961	108.924	126.794	109.912	122.998	139.183	142.402	152.937	113.13	145.459	100.375	155.337	156.136	140.205	150.575	133.544	131.594	144.931	92.8677	113.65	130.466	157.787	136.296	115.497	132.667	148.999	73.5697			93.5993	151.433
WhiteFemaleYoungAdult.png	151.472	139.953		154.255	132.816	130.763	149.761	122.231	144.382	99.0372	128.027	151.252	163.076	176.031	137.122	146.393	165.407	154.945	100.125		171.399	151.22	157.016	144.932	133.764	135.126	115.436	149.799	146.658		152.468	143.702	114.268	150.726	148.683	106.522	111.347	139.246	154.351
WhiteMaleElderly.png		111.971			141.416	108.935	124.8		146.772	135.291			112.493	149.32	161.035			142.766			141.984	135.016	102.5		153.543	141.447		142.715	129.22	121.402			134.843	110.017	91.66			124.043	155.903
WhiteMaleMiddleAged.png	117.279	93.8592		129.731	99.5001	95.4834	101.68		96.6538	76.5108	116.113		111.862	126.649	129.315	134.964	117.066		103.923		138.347	122.886	111.428	107.229	97.4418	88.2531		104.342	105.479	113.626	120.907	106.069	116.601	115.227	98.3896	79.3453	119.635	97.5522
WhiteMaleYoungAdult.png		121.034	156.688	155.199	129.589	152.891	146.823	146.008		110.267	153.244		160.297	163.874	159.84	159.486	163.662	149.554	124.092	108.757	176.153	157.593	165.575	155.727	136.069	138.245	130.133	169.374	151.431	158.687	149.039	135.088	109.079	166.54	152.039			118.761	146.942
SDXL	bathing	bowing	buying	clapping	climbing	cooking	crawling	crying	dancing	digging	diving	dreaming	drinking	eating	fighting	giving	hugging	jumping	kissing	knitting	laughing	listening	painting	playing	reading	riding	sewing	singing	sitting	skiing	sleeping	smelling	snoring	standing	talking	thinking	waiting	washing	writing
v1_img2img_AsianFemaleElderly.jpg.png	155.258	117.601	132.72	116.419		127.804	99.0325	146.966	126.501	106.489	123.575	110.669	98.5704	119.108	89.6608	126.583	160.029		111.019	112.786	116.995	133.856	111.533	126.807	141.095			144.001	98.4093	126.259	145.378	112.321	154.645		106.122	123.799	114.529	151.055	125.051
v1_img2img_AsianFemaleMiddleAged.jpg.png	130.009	139.427	146.12	127.87		130.705	142.274	157.245	145.473	102.174	134.312	133.95	140.144	118.202	119.25	132.02	132.178	159.731	127.199	137.93	158.904	130.511	121.338	133.33	138.832	139.164	147.909	147.402	114.356	132.303	128.305	149.952	148.23	130.192	139.499	120.139	113.633	146.352	116.275
v1_img2img_AsianFemaleYoungAdult.jpg.png	174.75	148.459	169.391	142.295	134.392	135.966	153.153	156.778	144.321	120.409	124.863	155.701	169.072	157.349	130.292	131.449	136.575	139.146		140.343	131.474	146.411	161.293	141.377	142.503	150.979	180.731	156.101	144.377	147.022	173.396	149.109	175.915	142.808	158.06	135.544	165.419	165.359	143.343
v1_img2img_AsianMaleElderly.jpg.png	144.875	120.558	131.047	120.813		142.671		130.178	131.74	135.149	127.362	139.016	153.235	142.111	124.832	151.379			142.416	134.878	148.791	116.12	148.836	108.09	142.04	139.233	120.656	146.785	147.695	143.559	130.668	129.195		142.359	102.411		112.575	129.785	144.536
v1_img2img_AsianMaleMiddleAged.jpg.png		121.079	65.787	106.058	102.468	112.743	127.971	83.3296	113.395	122.08	155.623	98.7711	116.738	111.61	99.0732	90.9498			125.944	111.111	126.542	77.9767	109.408	104.647	97.0733	135.355	112	113.56	85.1318	68.6793	92.1975	108.268	124.791	102.664	81.4081	78.4084	84.2555	126.913	55.0068
v1_img2img_AsianMaleYoungAdult.jpg.png			128.377	107.583		124.284		114.87		125.935	126.825	122.888	122.882	119.44	120.979	135.943		135.48		114.966	105.702	111.7	119.333	121.987	108.91	119.754	127.784	123.662	108.579	114.634	122.476	105	116.671	112.408	110.978	121.059	138.83
v1_img2img_BlackFemaleElderly.jpg.png			104.683	104.272			135.977	121.864	148.314		123.399	122.934		134.168		103.99		123.065			119.52	104.373	116.063	117.589	133.029		131.199	113.587	98.5591	115.088	110.958	95.7378	100.992	107.689	106.89	118.754		158.388	103.919
v1_img2img_BlackFemaleMiddleAged.jpg.png	124.364		95.283	95.7553	99.5949	109.408		87.5855			103.64	102.522	86.0238	130.432	104.299		95.4928	85.4742		122.22	84.6775	97.0105	102.826	90.689	106.481	71.3582	105.759	98.8338	118.287		104.546	104.719	88.5528	110.639	88.8981	111.402	126.237	106.854	97.5754
v1_img2img_BlackFemaleYoungAdult.jpg.png	118.199	117.487	113.038	127.399	114.486	114.677	109.871	130.444	117.169	110.217	109.494	105.926	111.41	100.298	105.985	113.046		106.43		123.726	107.587	128.1	121.735	109.738	112.854	109.894	117.439	122.375	125.8	102.601	121.857	131.994	119.572	105.596	112.828	129.387	129.206	124.215	117.959
v1_img2img_BlackMaleElderly.jpg.png	121.494	153.454	123.132	134.985	134.42	134.445	140.652	113.089	123.365	123.533	135.77	108.742	115.582	149.731	120.675	134.872	126.506		142.868	133.034	118.089	123.886	138.077	159.355	141.691	102.841	114.732	117.936	121.272	133.448	126.361	108.498	129.382	133.161	138.919	144.714	112.268	159.309	119.953
v1_img2img_BlackmaleMiddleAged.jpg.png	130.369	105.554	111.499	121.416	97.1948	107.159	86.1158	91.1479	99.9047	81.3822	106.708	133.037	101.619	124.009	120.857	99.08	99.1843	136.777	122.192	107.956	104.582	113.347	99.5375	110.697	137.731	117.366	125.695	99.54	99.475	116.073	98.8832	125.787	135.417	111.596	107.468	96.5499	95.5047	131.685	116.547
v1_img2img_BlackMaleYoungAdult.jpg.png	97.4595	115.603	117.635	103.156			124.577	82.9232	125.17	128.803	115.345	130.906	130.156	141.452	119.432	83.0991	130.096		114.539	97.6006	66.1567	106.885	101.423	116.215	79.0872		133.125	110.978	142.222		94.7086	88.0993	85.077	119.68	82.9923	135.548	90.6034		103.823
v1_img2img_WhiteFemaleElderly.jpg.png			150.5	151.195		168.762	137.67	136.307		128.332	124.232	143.06	138.496	156.333	134.703	135.797	150.415			135.801	131.958	149.12	121.395	162.384	146.167		140.696	161.385	150.978	148.627		124.09	130.65		116.989	153.344			150.693
v1_img2img_WhiteFemaleMiddleAged.jpg.png	151.851	126.746	150.122	137.434	125.715	142.385	131.055	129.777	129.799	127.473	127.739	133.154	127.713	140.35	142.262	139.554	133.799	150.971	146.711	143.58	140.812	130.744	137.466	153.421	147.753	133.223	149.595	135.207	164.705	129.216	144.228	133.096	130.005	126.796	126.073	144.697	151.442	159.796	139.436
v1_img2img_WhiteFemaleYoungAdult.jpg.png	157.525		157.856	154.586	135.46	156.345	136.967	145.573	163.044	133.507	154.957	142.469	142.264	157.527	120.681	155.04	131.379	126.251		145.813	147.204	144.694	141.71	129.789	136.662	125.947	129.252	138.177	134.146		140.942	138.937	135.337	132.899	150.689	119.816	173.205	135.989	144.395
v1_img2img_WhiteMaleElderly.jpg.png			156.935			153.007		163.673	148.983	147.767		150.092	121.958	125.688							143.632	114.329	129.235		126.69	142.87	132.812	145.001		111.484	149.346	122.131	127.123	136.292	155.062	147.053	128.276
v1_img2img_WhiteMaleMiddleAged.jpg.png	152.156	123.432	147.836	128.205	129.053	141.544	141.2	126.941	149.354	119.805	148.474	136.406		122.326	124.237	134.495	135.803	124.764	142.737	122.825	99.7349	123.159	120.244	121.717	121.712	130.964	161.463	133.641	134.314	113.658	129.946	126.45	136.043	124.973	118.838	118.98	113.713	133.664	126.559
v1_img2img_WhiteMaleYoungAdult.jpg.png	145.506	142.152	169.912	133.362	156.678	161.077	142.682	154.873	122.031	138.135	141.358	168.01	124.184	161.792	135.465	151.961	161.284	161.822	152.194	130.293	129.856	157.236	166.164	142.923	134.397	139.671	130.373	153.598	154.094	160.298	143.004	149.878	152.93	130.999	134.131	136.643	146.515	149.263	133.059
midjourney	bathing	bowing	buying	clapping	climbing	cooking	crawling	crying	dancing	digging	diving	dreaming	drinking	eating	fighting	giving	hugging	jumping	kissing	knitting	laughing	listening	painting	playing	reading	riding	sewing	singing	sitting	skiing	sleeping	smelling	snoring	standing	talking	thinking	waiting	washing	writing
AsianFemaleElderly.jpg	110.413	105.311	119.775	118.958	104.38	110.118	121.968	94.5092	109.594	96.0414	122.584	124.141	113.56	111.234	94.7681	117.817	124.236	99.3653	138.236	114.886	125.736	128.71	122.141	108.335	104.866	108.74	106.155	97.1643	108.878	98.9609	114.35	114.243	122.929	112.236	121.393	120.236	102.643	111.632	90.9936
AsianFemaleMiddleAged.jpg	120.03	103.04	111.389	128.743	96.1665	96.1481	128.421	124.76	116.969	102.539	109.897	119.698	111.44	113.361	108.762	116.807	115.913	93.552	135.323	96.2496	126.958	132.419	119.551	109.046	105.059	108.838	95.6368	123.799	113.422	100.339	113.011	104.224	126.662	109.494	120.536	113.425	110.801	111.974	93.804
AsianFemaleYoungAdult.jpg	135.191	111.047	111.947	128.95	103.466	94.315	138.22	123.833	116.783	116.168	123.412	117.342	122.511	131.176	100.779	111.285	111.28	103.891	137.323	112.91	149.818	139.231	132.555	126.644	115.819	117.484	110.706	132.735	120.412	118.245	132.52	111.089	125.814	92.641	128.209	122.555	128.708	122.68	117.603
AsianMaleElderly.jpg	100.618		99.8389	114.375	84.8669	88.1194	97.7272	98.4284	92.1725	91.3222	78.9602	113.103	92.6242	88.1545	86.1944	96.11	97.0514	87.2707	113.966	88.1333	102.679	108.662	105.515	86.8009	94.7105	101.786	84.3812	89.5424	90.0059	91.2995	101.025	96.3715	116.682	93.7192	94.7804	96.6056	93.3473	93.342	99.4837
AsianMaleMiddleAged.jpg	100.134	84.0432	108.316	122.808	105.045	87.7842	103.718	102.657	115.26	99.4063	96.128	114.883	101.562	103.441	87.0455	114.722	106.456	87.9538	133.805	92.6798	118.733	115.194	117.802	100.815	98.5349	106.56	96.3983	103.813	104.882	99.4724	110.705	101.744	110.918	101.473	118.347	104.94	97.9211	104.657	93.0966
AsianMaleYoungAdult.jpg	106.879	82.4083	97.4911	122.193	90.4981	98.9342	109.188	108.872	105.43	101.641	78.0639	107.196	93.2998	92.631	79.7176	93.9108	95.9475	95.2558	118.68	91.1114	117.938	120.703	109.775	96.7632	91.9206	94.1131	84.1067	116.296	95.6121	91.5838	108.005	99.176	110.327	106.035	115.789	108.283	110.708	93.5328	71.0461
BlackFemaleElderly.jpg	89.9736	81.283	90.8224	102.662	76.7338	78.6331	101.536	100.768	89.8907	83.319	84.276	96.0561	85.3825	87.0074	87.6598	98.6736	93.5232	69.8461	117.993	82.4016	104.417	107.131	104.681	89.0205	84.5734	88.9781	79.9566	88.9321	90.2498	82.5087	93.1486	97.1337	104.535	94.3207	94.8698	93.134	94.9704	87.355
BlackFemaleMiddleAged.jpg	81.7656	69.0517	89.3832	97.2264	78.388	77.1772	82.0893	75.4854	82.2995	80.95	65.5526	84.0268	85.2782	75.6609	63.8416	94.4017	85.9224	77.7412	94.0445	83.5294	90.9053	95.1631	102.198	90.2808	80.6299	92.9034	82.6728	85.3888	80.5265	85.5271	88.0647	91.2664	83.9514	85.5372	89.1985	88.614	85.0022	97.7659	81.5768
BlackFemaleYoungAdult.jpg	94.7695	93.733	95.7635	110.138	89.3572	94.498	109.47	102.318	93.459	91.7777	96.1553	95.6245	97.6558	103.351	86.6641	102.526	105.032	86.8397	107.862	94.5529	110.194	112.533	105.832	92.5404	90.6894	99.9565	98.3517	92.6136	98.5214	96.2418	101.542	95.6883	101.74	97.0846	100.583	104.717	105.768	99.5204	93.4766
BlackMaleElderly.jpg	96.0791	82.2055	109.26	108.472	94.6606	84.2531	102.535	98.419	101.545	103.612	95.0461	97.3172	95.1611	94.2081	92.3353	101.773	95.7523	83.0606	102.524	89.6883	112.482	122.915	112.933	90.5589	94.0447	90.334	95.4275	107.07	97.767	92.8402	101.596	104.125	106.116	102.93	106.8	105.824	110.47	95.1076
BlackMaleMiddleAged.jpg	81.0515		94.748	90.4492	81.3824	80.2325	94.1171	83.5616	96.228	92.7478	82.3737	87.3454	84.1895	90.4074	87.3114	88.9727	86.6694	83.5673	97.0239	82.2121	88.4538	102.326	93.2902	90.7729	84.9732	89.2309	91.7979	89.6885	87.7624	83.2244	80.1476	84.1983	94.6579	79.317	90.6097	91.6334	95.8975	89.4943	79.1528
BlackMaleYoungAdult.jpg	87.6293	64.4372	91.5329	95.7531	74.3607	80.2146	92.7474	81.4771	85.0539	80.3586	65.6034	89.66	79.4768	86.7696	62.375	81.7981	80.1548	70.1418	100.339	68.6612	97.7412	89.805	93.7848	79.3663	75.9745	83.9211	75.2921	80.7477	90.6711	74.1463	79.2143	99.8187	91.0617	82.6168	91.2998	75.2645	95.2526	84.9586	57.299
WhiteFemaleElderly.jpg	122.132	116.281	114.18	140.462	98.5502	105.302	133.864	113.16	132.417	112.358	107.857	124.423	113.802	114.05	99.3761	109.988	120.737	110.054	144.177	116.293	133.385	132.227	125.727	121.738	111.63	109.629	117.467	124.036	117.089	115.294	111.389	113.125	115.624	104.746	123.198	120.116	119.869	120.603	101.81
WhiteFemaleMiddleAged.jpg	129.896	117.294	122.557	141.576	115.63	104.315	142.894	118.632	123.148	120.948	120.341	129.511	117.11	116.577	117.69	124.16	125.287	103.322	140.66	122.121	131.093	145.37	132.25	114.402	112.303	119.703	113.97	119.68	116.659	113.013	137.592	119.282	130.592	111.34	125.391	126.432	119.345	124.204	122.383
WhiteFemaleYoungAdult.jpg	125.13	102.355	113.416	130.338	107.989	107.187	144.184	117.686	120.025	101.588	127.375	120.195	124.526	119.879	101.404	114.776	123.967	109.341	140.366	103.539	131.114	139.203	124.993	122.29	103.071	115.091	110.666	119.514	116.918	125.516	121.255	118.313	123.366	105.321	123.497	119.736	111.859	121.939	101.956
WhiteMaleElderly.jpg	114.418		113.219	117.631	91.9106	98.9831	125.246	102.285	126.539	93.6329	118.984	113.233	107.616	108.672	90.8734	122.379	102.933	107.658	148.767	102.13	130.353	138.382	112.77	106.315	112.306	97.6109	100.748	105.212	107.061	92.8133	105.987	112.639	101.58	99.53	122.285	112.646	102.912	105.635	105.612
WhiteMaleMiddleAged.jpg	71.5912		97.0975	100.481	79.4379	78.1788	86.6674	86.1454	70.9896	79.1882	71.7125	74.5254	84.6964	82.7051	64.7393	87.0984	86.3917	69.1126	92.7626	75.4095	93.5499	99.0664	93.1162	80.7743	84.2312	86.5443	80.9467	95.2464	75.1149	80.9461	88.1472	88.0451	98.6918	66.3488	98.7558	102.032	91.6157	84.6661	79.4525
WhiteMaleYoungAdult.jpg	120.772	111.787	120.766	132.184	92.9231	93.7699	129.58	119.801	117.603	93.7481	89.1614	120.728	112.337	117.793	95.8818	112.593	116.792	94.3087	139.35	105.504	129.579	126.463	122.465	114.403	101.239	101.246	111.267	118.208	111.829	103.196	109.133	118.652	109.488	106.906	116.163	121.394	115.248	110.985	99.1049
Original
AsianFemaleElderly.jpg	128.797	128.797	128.797	128.797	128.797	128.797	128.797	128.797	128.797	128.797	128.797	128.797	128.797	128.797	128.797	128.797	128.797	128.797	128.797	128.797	128.797	128.797	128.797	128.797	128.797	128.797	128.797	128.797	128.797	128.797	128.797	128.797	128.797	128.797	128.797	128.797	128.797	128.797	128.797
AsianFemaleMiddleAged.jpg	137.39	137.39	137.39	137.39	137.39	137.39	137.39	137.39	137.39	137.39	137.39	137.39	137.39	137.39	137.39	137.39	137.39	137.39	137.39	137.39	137.39	137.39	137.39	137.39	137.39	137.39	137.39	137.39	137.39	137.39	137.39	137.39	137.39	137.39	137.39	137.39	137.39	137.39	137.39
AsianFemaleYoungAdult.jpg	115.896	115.896	115.896	115.896	115.896	115.896	115.896	115.896	115.896	115.896	115.896	115.896	115.896	115.896	115.896	115.896	115.896	115.896	115.896	115.896	115.896	115.896	115.896	115.896	115.896	115.896	115.896	115.896	115.896	115.896	115.896	115.896	115.896	115.896	115.896	115.896	115.896	115.896	115.896
AsianMaleElderly.jpg	139.617	139.617	139.617	139.617	139.617	139.617	139.617	139.617	139.617	139.617	139.617	139.617	139.617	139.617	139.617	139.617	139.617	139.617	139.617	139.617	139.617	139.617	139.617	139.617	139.617	139.617	139.617	139.617	139.617	139.617	139.617	139.617	139.617	139.617	139.617	139.617	139.617	139.617	139.617
AsianMaleMiddleAged.jpg	126.627	126.627	126.627	126.627	126.627	126.627	126.627	126.627	126.627	126.627	126.627	126.627	126.627	126.627	126.627	126.627	126.627	126.627	126.627	126.627	126.627	126.627	126.627	126.627	126.627	126.627	126.627	126.627	126.627	126.627	126.627	126.627	126.627	126.627	126.627	126.627	126.627	126.627	126.627
AsianMaleYoungAdult.jpg	118.437	118.437	118.437	118.437	118.437	118.437	118.437	118.437	118.437	118.437	118.437	118.437	118.437	118.437	118.437	118.437	118.437	118.437	118.437	118.437	118.437	118.437	118.437	118.437	118.437	118.437	118.437	118.437	118.437	118.437	118.437	118.437	118.437	118.437	118.437	118.437	118.437	118.437	118.437
BlackFemaleElderly.jpg	92.49	92.49	92.49	92.49	92.49	92.49	92.49	92.49	92.49	92.49	92.49	92.49	92.49	92.49	92.49	92.49	92.49	92.49	92.49	92.49	92.49	92.49	92.49	92.49	92.49	92.49	92.49	92.49	92.49	92.49	92.49	92.49	92.49	92.49	92.49	92.49	92.49	92.49	92.49
BlackFemaleMiddleAged.jpg	89.7912	89.7912	89.7912	89.7912	89.7912	89.7912	89.7912	89.7912	89.7912	89.7912	89.7912	89.7912	89.7912	89.7912	89.7912	89.7912	89.7912	89.7912	89.7912	89.7912	89.7912	89.7912	89.7912	89.7912	89.7912	89.7912	89.7912	89.7912	89.7912	89.7912	89.7912	89.7912	89.7912	89.7912	89.7912	89.7912	89.7912	89.7912	89.7912
BlackFemaleYoungAdult.jpg	120.413	120.413	120.413	120.413	120.413	120.413	120.413	120.413	120.413	120.413	120.413	120.413	120.413	120.413	120.413	120.413	120.413	120.413	120.413	120.413	120.413	120.413	120.413	120.413	120.413	120.413	120.413	120.413	120.413	120.413	120.413	120.413	120.413	120.413	120.413	120.413	120.413	120.413	120.413
BlackMaleElderly.jpg	114.802	114.802	114.802	114.802	114.802	114.802	114.802	114.802	114.802	114.802	114.802	114.802	114.802	114.802	114.802	114.802	114.802	114.802	114.802	114.802	114.802	114.802	114.802	114.802	114.802	114.802	114.802	114.802	114.802	114.802	114.802	114.802	114.802	114.802	114.802	114.802	114.802	114.802	114.802
BlackmaleMiddleAged.jpg	95.791	95.791	95.791	95.791	95.791	95.791	95.791	95.791	95.791	95.791	95.791	95.791	95.791	95.791	95.791	95.791	95.791	95.791	95.791	95.791	95.791	95.791	95.791	95.791	95.791	95.791	95.791	95.791	95.791	95.791	95.791	95.791	95.791	95.791	95.791	95.791	95.791	95.791	95.791
BlackMaleYoungAdult.jpg	95.4419	95.4419	95.4419	95.4419	95.4419	95.4419	95.4419	95.4419	95.4419	95.4419	95.4419	95.4419	95.4419	95.4419	95.4419	95.4419	95.4419	95.4419	95.4419	95.4419	95.4419	95.4419	95.4419	95.4419	95.4419	95.4419	95.4419	95.4419	95.4419	95.4419	95.4419	95.4419	95.4419	95.4419	95.4419	95.4419	95.4419	95.4419	95.4419
WhiteFemaleElderly.jpg	146.82	146.82	146.82	146.82	146.82	146.82	146.82	146.82	146.82	146.82	146.82	146.82	146.82	146.82	146.82	146.82	146.82	146.82	146.82	146.82	146.82	146.82	146.82	146.82	146.82	146.82	146.82	146.82	146.82	146.82	146.82	146.82	146.82	146.82	146.82	146.82	146.82	146.82	146.82
WhiteFemaleMiddleAged.jpg	141.961	141.961	141.961	141.961	141.961	141.961	141.961	141.961	141.961	141.961	141.961	141.961	141.961	141.961	141.961	141.961	141.961	141.961	141.961	141.961	141.961	141.961	141.961	141.961	141.961	141.961	141.961	141.961	141.961	141.961	141.961	141.961	141.961	141.961	141.961	141.961	141.961	141.961	141.961
WhiteFemaleYoungAdult.jpg	155.75	155.75	155.75	155.75	155.75	155.75	155.75	155.75	155.75	155.75	155.75	155.75	155.75	155.75	155.75	155.75	155.75	155.75	155.75	155.75	155.75	155.75	155.75	155.75	155.75	155.75	155.75	155.75	155.75	155.75	155.75	155.75	155.75	155.75	155.75	155.75	155.75	155.75	155.75
WhiteMaleElderly.jpg	95.3903	95.3903	95.3903	95.3903	95.3903	95.3903	95.3903	95.3903	95.3903	95.3903	95.3903	95.3903	95.3903	95.3903	95.3903	95.3903	95.3903	95.3903	95.3903	95.3903	95.3903	95.3903	95.3903	95.3903	95.3903	95.3903	95.3903	95.3903	95.3903	95.3903	95.3903	95.3903	95.3903	95.3903	95.3903	95.3903	95.3903	95.3903	95.3903
WhiteMaleMiddleAged.jpg	93.7648	93.7648	93.7648	93.7648	93.7648	93.7648	93.7648	93.7648	93.7648	93.7648	93.7648	93.7648	93.7648	93.7648	93.7648	93.7648	93.7648	93.7648	93.7648	93.7648	93.7648	93.7648	93.7648	93.7648	93.7648	93.7648	93.7648	93.7648	93.7648	93.7648	93.7648	93.7648	93.7648	93.7648	93.7648	93.7648	93.7648	93.7648	93.7648
WhiteMaleYoungAdult.jpg	153.004	153.004	153.004	153.004	153.004	153.004	153.004	153.004	153.004	153.004	153.004	153.004	153.004	153.004	153.004	153.004	153.004	153.004	153.004	153.004	153.004	153.004	153.004	153.004	153.004	153.004	153.004	153.004	153.004	153.004	153.004	153.004	153.004	153.004	153.004	153.004	153.004	153.004	153.004
sd1.5	bathing	bowing	buying	clapping	climbing	cooking	crawling	crying	dancing	digging	diving	dreaming	drinking	eating	fighting	giving	hugging	jumping	kissing	knitting	laughing	listening	painting	playing	reading	riding	sewing	singing	sitting	skiing	sleeping	smelling	snoring	standing	talking	thinking	waiting	washing	writing
AsianFemaleElderly.jpg	0		1		0	-1	0	-1	0	1			1		-1	1	1	0		1	1	0	1	0			-1	1	0	0	0		1	1	0	1	0	0	1
AsianFemaleMiddleAged.jpg	1	0	1	0	1	0	0	0	0	0	1	-1	-1	0	0	1	0	1	0	1	0	0	0	-1	0	-1	0	0	0	0	0	0	1	0	0	0	1	0	0
AsianFemaleYoungAdult.jpg	1		1	1	1	1	1	1	1	1	1	1	1	1	1	1	1	1	1	1	1	1	1	1	1	1	1	1	1	1	1		1	1	1	1	1	1	1
AsianMaleElderly.jpg	0	-1	0	-1	1	-1	-1	0	0	0	-1	-1	-1	0	-1	0	0	0	-1	1	0	0	-1	-1	0	0	-1	1	-1	0	0	0	-1	0	-1	0	0	-1	0
AsianMaleMiddleAged.jpg	1	0	0	-1	1	0	1	0	0	0	0	-1	0	1	-1	0	1	1	-1	1	1	1	0	1	1	0	-1	0		0	0	1	0	1	0	0	-1	0	0
AsianMaleYoungAdult.jpg	0		-1	0	0	0	0	0	-1	0	0	-1	-1	0	0	0	1	0	-1	0	0	-1	0	-1	0	0	-1	0	0	-1	-1	0	1	0	0	0	0	0	-1
BlackFemaleElderly.jpg	1		1	0	1	1	1	1	1	1		1		1	0	1	1	0	0	1	1	1	1	1			0		1	1	1	1	1	1	1	1	1	1
BlackFemaleMiddleAged.jpg	1		0	0	0	0	0	-1	0	0	0	-1	0	0	0	0	1	1		1	1	0	0	-1	0	-1	-1	0	0	0	0	0	1	0	0	1	0	1	0
BlackFemaleYoungAdult.jpg	1	0	1	0	1	0	0	1	1	1	0	0	0	1	0	1	1	0	0	1	1	0	1	0	1	0	-1	0	0	1	0	1	1	1	0	1	0	1	0
BlackMaleElderly.jpg	1		0	-1	1	0	0	0	1	1	0	0	0	1	-1	1	1	1	-1	0	0	1	1	-1	0	0	-1	0	0	0	0	1	1	0	0	0	1	1	0
BlackmaleMiddleAged.jpg	1	0	0	0	1	0	0	0	0	0	0	0	0	0	0	1	1	1	0	0	0	0	0	-1	0	0	-1	0	0	1	-1	0	1	1	0	0	0	0	0
BlackMaleYoungAdult.jpg	0	-1	0	0	1	0	0	0	-1	0	-1	-1	-1	0	-1	1	1	0	-1	1	0	0	-1	-1	0	0	-1	0	-1		-1	0	1	1	0	0	-1	0	0
WhiteFemaleElderly.jpg	1		0	-1	1	0	0	0	0	1	1	0	0	0	-1	1	-1	0	-1	1	1	1	0	0		0		0	0	1	1	0	-1	0	0	0	1	0	0
WhiteFemaleMiddleAged.jpg	1	0	1	0	1	-1	0	0	1	0	0	1	-1	0	0	1	1	1	0	1	-1	1	1	0	0	0	0	1	1	1	0	1	1	0	1	0	0	0	0
WhiteFemaleYoungAdult.jpg	1	-1	0	0	0	-1	0	0	0	0	0	0	0	-1	-1	0	1	0	0	0	0	0	0	0	-1	0	-1	0	0	0	0	1	-1	1	0	1	0	1	0
WhiteMaleElderly.jpg	1	1	1	1	1	1	1	1	1	1	1	1			1		1	1		1	1	1		1	1	1	1		1	1	1	1	1	1	1		1	1	1
WhiteMaleMiddleAged.jpg	1	1	1		1	1	1	1	1	1		1	1	1	1	1	1	1	1	1	1	1	1	1	1	1	0	1	1	1	1	1	1	1	1	1	1	1	1
WhiteMaleYoungAdult.jpg	1	1	0	0	0	-1	0	-1	0	0	0	-1	-1	1	0	1	0	0	0	1	0	0	0	0	0	0	-1	0	0	0	0	1	0	0	0	0	0	1	1
变浅count	14	3	8	2	13	4	5	5	7	8	4	5	3	7	3	12	14	9	2	14	9	8	7	5	5	3	2	5	5	8	5	9	13	10	5	7	7	9	5
变深count	0	3	1	4	0	4	1	2	2	0	2	7	6	1	6	0	1	0	6	0	1	1	2	7	1	2	10	0	2	1	3	0	3	0	1	0	2	1	1
sd2.1	bathing	bowing	buying	clapping	climbing	cooking	crawling	crying	dancing	digging	diving	dreaming	drinking	eating	fighting	giving	hugging	jumping	kissing	knitting	laughing	listening	painting	playing	reading	riding	sewing	singing	sitting	skiing	sleeping	smelling	snoring	standing	talking	thinking	waiting	washing	writing
AsianFemaleElderly.jpg	-1	-1		-1	0	-1	-1	-1				-1	-1		0	1	0	-1	-1	0	0		0	0	-1		0	-1	-1					0	-1	-1		-1	-1
AsianFemaleMiddleAged.jpg	-1		-1	-1	-1	0		-1	-1	-1		-1	0	-1	-1		-1				1	-1	1	-1		-1	0	-1	-1	0	-1	-1	-1	-1	-1			-1	-1
AsianFemaleYoungAdult.jpg		-1	1	-1		1		0	0	-1	1	1			-1		1	1	-1		1	1	1	1	0	1	1	1		1	1	1	1	1	-1			1	1
AsianMaleElderly.jpg		-1	0	-1	-1		-1	-1		-1	0	-1	0	-1	-1	0		-1	-1	-1	1	0	0	-1	-1	0	-1	-1	-1	-1	-1	-1	-1	-1	-1	-1	-1	-1	-1
AsianMaleMiddleAged.jpg	-1	-1	0	1	0	0	-1	-1	0	-1			-1	0	-1	0	1	0	-1		1	0	1	0	-1	0	-1	1	0	-1	-1	-1	-1	0	0	0	-1	-1	0
AsianMaleYoungAdult.jpg	1		0	0	-1	-1	-1	-1	-1		0			1	-1	1	1				0	-1	-1			1	-1		0		0	-1	0		-1		-1	-1	0
BlackFemaleElderly.jpg	0	-1	1	0		0		0	0		0	0			0	0					1		1		-1	1			-1	0	1	0			1			-1	0
BlackFemaleMiddleAged.jpg	0	0	0	0	0	-1	0	-1	-1	0	-1	0	-1	1	-1		0	-1	-1	-1	1	0	0	-1	0	0	0	0	-1		0	-1	-1	0	0		-1	-1	0
BlackFemaleYoungAdult.jpg	0		1	0	0	-1	0	-1	-1	0	-1	0	0		-1		0	1	-1		1	1		0	-1	1	-1	0	0	1	0	0	-1	1	1	0		0	-1
BlackMaleElderly.jpg	-1	-1	0	-1	0	-1	0	-1	-1	-1	0	-1	-1	1	-1	0	0	-1	-1		1	1	-1	0	-1		-1		-1		-1	-1	0	0	-1	-1	-1	-1	1
BlackmaleMiddleAged.jpg	0	-1	1	0	1	0	0	0	0	0	1	0	0	0	1	0	1	0	-1	0	1	0	0		0	1	0	0	0		-1	0	0	1	-1	-1	-1	0	0
BlackMaleYoungAdult.jpg	0	-1	0	0		0	1	0	-1	0	0	0	0	0	0		1		0		1	0	0	0	0	0			-1		0	0	0		1		-1	-1	1
WhiteFemaleElderly.jpg	0		-1			-1	-1	-1	0	-1	-1			1	-1	0					1	0	0	0	-1	-1			-1		0	-1		-1	-1			-1	-1
WhiteFemaleMiddleAged.jpg		-1		0	-1	0	0	-1	-1	-1	-1	-1	-1	0	0	1	-1	0	-1	1	1	0	0	0	-1	0	-1	-1	-1	1	0	-1	0	0	-1			-1	0
WhiteFemaleYoungAdult.jpg	0	-1		0	-1	-1	0	-1	-1	-1	-1	0	0	1	-1	0	0	0	-1		1	0	0	-1	-1	-1	-1	0	0		0	-1	-1	0	0	-1	-1	-1	0
WhiteMaleElderly.jpg		1			1	1	1		1	1			1	1	1			1			1	1	0		1	1		1	1	1			1	1	0			1	1
WhiteMaleMiddleAged.jpg	1	0		1	0	0	0		0	-1	1		1	1	1	1	1		1		1	1	1	1	0	0		1	1	1	1	1	1	1	0	-1	1	0
WhiteMaleYoungAdult.jpg		-1	0	0	-1	0	0	0		-1	0		0	1	0	0	1	0	-1	-1	1	0	1	0	-1	-1	-1	1	0	0	0	-1	-1	1	0			-1	0
变浅count	2	1	4	2	2	2	2	0	1	1	3	1	2	8	3	4	7	3	1	1	16	5	6	2	1	6	1	5	2	5	3	2	3	6	3	0	1	2	4
变深count	3	10	2	4	6	6	4	10	8	10	5	4	4	2	10	0	2	3	10	3	0	2	2	4	9	4	8	3	8	2	5	10	7	3	8	5	8	12	4
SDXL	bathing	bowing	buying	clapping	climbing	cooking	crawling	crying	dancing	digging	diving	dreaming	drinking	eating	fighting	giving	hugging	jumping	kissing	knitting	laughing	listening	painting	playing	reading	riding	sewing	singing	sitting	skiing	sleeping	smelling	snoring	standing	talking	thinking	waiting	washing	writing
v1_img2img_AsianFemaleElderly.jpg.png	1	-1	0	-1		0	-1	1	0	-1	0	-1	-1	0	-1	0	1		-1	-1	-1	0	-1	0	1			1	-1	0	1	-1	1		-1	0	-1	1	0
v1_img2img_AsianFemaleMiddleAged.jpg.png	0	0	0	0		0	0	1	0	-1	0	0	0	-1	-1	0	0	1	-1	0	1	0	-1	0	0	0	1	1	-1	0	0	1	1	0	0	-1	-1	0	-1
v1_img2img_AsianFemaleYoungAdult.jpg.png	1	1	1	1	1	1	1	1	1	0	0	1	1	1	1	1	1	1		1	1	1	1	1	1	1	1	1	1	1	1	1	1	1	1	1	1	1	1
v1_img2img_AsianMaleElderly.jpg.png	0	-1	0	-1		0		0	0	0	-1	0	1	0	-1	1			0	0	0	-1	0	-1	0	0	-1	0	0	0	0	-1		0	-1		-1	0	0
v1_img2img_AsianMaleMiddleAged.jpg.png		0	-1	-1	-1	-1	0	-1	-1	0	1	-1	0	-1	-1	-1			0	-1	0	-1	-1	-1	-1	0	-1	-1	-1	-1	-1	-1	0	-1	-1	-1	-1	0	-1
v1_img2img_AsianMaleYoungAdult.jpg.png			0	-1		0		0		0	0	0	0	0	0	1		1		0	-1	0	0	0	0	0	0	0	0	0	0	-1	0	0	0	0	1
v1_img2img_BlackFemaleElderly.jpg.png			1	1			1	1	1		1	1		1		1		1			1	1	1	1	1		1	1	0	1	1	0	0	1	1	1		1	1
v1_img2img_BlackFemaleMiddleAged.jpg.png	1		0	0	0	1		0			1	1	0	1	1		0	0		1	0	0	1	0	1	-1	1	0	1		1	1	0	1	0	1	1	1	0
v1_img2img_BlackFemaleYoungAdult.jpg.png	0	0	0	0	0	0	-1	1	0	-1	-1	-1	0	-1	-1	0		-1		0	-1	0	0	-1	0	-1	0	0	0	-1	0	1	0	-1	0	0	0	0	0
v1_img2img_BlackMaleElderly.jpg.png	0	1	0	1	1	1	1	0	0	0	1	0	0	1	0	1	1		1	1	0	0	1	1	1	-1	0	0	0	1	1	0	1	1	1	1	0	1	0
v1_img2img_BlackmaleMiddleAged.jpg.png	1	0	1	1	0	1	0	0	0	-1	1	1	0	1	1	0	0	1	1	1	0	1	0	1	1	1	1	0	0	1	0	1	1	1	1	0	0	1	1
v1_img2img_BlackMaleYoungAdult.jpg.png	0	1	1	0			1	-1	1	1	1	1	1	1	1	-1	1		1	0	-1	1	0	1	-1		1	1	1		0	0	-1	1	-1	1	0		0
v1_img2img_WhiteFemaleElderly.jpg.png			0	0		1	0	-1		-1	-1	0	0	0	-1	-1	0			-1	-1	0	-1	1	0		0	1	0	0		-1	-1		-1	0			0
v1_img2img_WhiteFemaleMiddleAged.jpg.png	0	-1	0	0	-1	0	-1	-1	-1	-1	-1	0	-1	0	0	0	0	0	0	0	0	-1	0	1	0	0	0	0	1	-1	0	0	-1	-1	-1	0	0	1	0
v1_img2img_WhiteFemaleYoungAdult.jpg.png	0		0	0	-1	0	-1	-1	0	-1	0	-1	-1	0	-1	0	-1	-1		0	0	-1	-1	-1	-1	-1	-1	-1	-1		-1	-1	-1	-1	0	-1	1	-1	-1
v1_img2img_WhiteMaleElderly.jpg.png			1			1		1	1	1		1	1	1							1	1	1		1	1	1	1		1	1	1	1	1	1	1	1
v1_img2img_WhiteMaleMiddleAged.jpg.png	1	1	1	1	1	1	1	1	1	1	1	1		1	1	1	1	1	1	1	0	1	1	1	1	1	1	1	1	1	1	1	1	1	1	1	1	1	1
v1_img2img_WhiteMaleYoungAdult.jpg.png	0	-1	1	-1	0	0	-1	0	-1	-1	-1	1	-1	0	-1	0	0	0	0	-1	-1	0	1	-1	-1	-1	-1	0	0	0	-1	0	0	-1	-1	-1	0	0	-1
变浅count	5	4	7	5	3	7	5	7	5	3	7	8	4	8	5	6	5	6	4	5	4	6	7	8	8	4	8	8	5	6	7	7	7	8	6	7	6	8	4
变深count	0	3	1	4	3	1	4	5	3	7	5	3	3	3	7	3	1	2	1	3	5	4	4	5	4	5	4	2	3	3	3	5	4	5	6	4	3	1	4
midjourney	bathing	bowing	buying	clapping	climbing	cooking	crawling	crying	dancing	digging	diving	dreaming	drinking	eating	fighting	giving	hugging	jumping	kissing	knitting	laughing	listening	painting	playing	reading	riding	sewing	singing	sitting	skiing	sleeping	smelling	snoring	standing	talking	thinking	waiting	washing	writing
AsianFemaleElderly.png	-1	-1	0	0	-1	-1	0	-1	-1	-1	0	0	-1	-1	-1	-1	0	-1	0	-1	0	0	0	-1	-1	-1	-1	-1	-1	-1	-1	-1	0	-1	0	0	-1	-1	-1
AsianFemaleMiddleAged.png	-1	-1	-1	0	-1	-1	0	-1	-1	-1	-1	-1	-1	-1	-1	-1	-1	-1	0	-1	-1	0	-1	-1	-1	-1	-1	-1	-1	-1	-1	-1	-1	-1	-1	-1	-1	-1	-1
AsianFemaleYoungAdult.png	1	0	0	1	-1	-1	1	0	0	0	0	0	0	1	-1	0	0	-1	1	0	1	1	1	1	0	0	0	1	0	0	1	0	0	-1	1	0	1	0	0
AsianMaleElderly.png	-1		-1	-1	-1	-1	-1	-1	-1	-1	-1	-1	-1	-1	-1	-1	-1	-1	-1	-1	-1	-1	-1	-1	-1	-1	-1	-1	-1	-1	-1	-1	-1	-1	-1	-1	-1	-1	-1
AsianMaleMiddleAged.png	-1	-1	-1	0	-1	-1	-1	-1	-1	-1	-1	-1	-1	-1	-1	-1	-1	-1	0	-1	0	-1	0	-1	-1	-1	-1	-1	-1	-1	-1	-1	-1	-1	0	-1	-1	-1	-1
AsianMaleYoungAdult.png	-1	-1	-1	0	-1	-1	0	0	-1	-1	-1	-1	-1	-1	-1	-1	-1	-1	0	-1	0	0	0	-1	-1	-1	-1	0	-1	-1	-1	-1	0	-1	0	-1	0	-1	-1
BlackFemaleElderly.png	0	-1	0	1	-1	-1	0	0	0	0	0	0	0	0	0	0	0	-1	1	-1	1	1	1	0	0	0	-1	0	0	0	0	0	1	0	0	0	0	0
BlackFemaleMiddleAged.png	0	-1	0	0	-1	-1	0	-1	0	0	-1	0	0	-1	-1	0	0	-1	0	0	0	0	1	0	0	0	0	0	0	0	0	0	0	0	0	0	0	0	0
BlackFemaleYoungAdult.png	-1	-1	-1	-1	-1	-1	-1	-1	-1	-1	-1	-1	-1	-1	-1	-1	-1	-1	-1	-1	-1	0	-1	-1	-1	-1	-1	-1	-1	-1	-1	-1	-1	-1	-1	-1	-1	-1	-1
BlackMaleElderly.png	-1	-1	0	0	-1	-1	-1	-1	-1	-1	-1	-1	-1	-1	-1	-1	-1	-1	-1	-1	0	0	0	-1	-1	-1	-1	0	-1	-1	-1	-1	0	-1	0	0	0	-1
BlackMaleMiddleAged.png	-1		0	0	-1	-1	0	-1	0	0	-1	0	-1	0	0	0	0	-1	0	-1	0	0	0	0	-1	0	0	0	0	-1	-1	-1	0	-1	0	0	0	0	-1
BlackMaleYoungAdult.png	0	-1	0	0	-1	-1	0	-1	-1	-1	-1	0	-1	0	-1	-1	-1	-1	0	-1	0	0	0	-1	-1	-1	-1	-1	0	-1	-1	0	0	-1	0	-1	0	-1	-1
WhiteFemaleElderly.png	-1	-1	-1	0	-1	-1	-1	-1	-1	-1	-1	-1	-1	-1	-1	-1	-1	-1	0	-1	-1	-1	-1	-1	-1	-1	-1	-1	-1	-1	-1	-1	-1	-1	-1	-1	-1	-1	-1
WhiteFemaleMiddleAged.png	-1	-1	-1	0	-1	-1	0	-1	-1	-1	-1	-1	-1	-1	-1	-1	-1	-1	0	-1	-1	0	0	-1	-1	-1	-1	-1	-1	-1	0	-1	-1	-1	-1	-1	-1	-1	-1
WhiteFemaleYoungAdult.png	-1	-1	-1	-1	-1	-1	-1	-1	-1	-1	-1	-1	-1	-1	-1	-1	-1	-1	-1	-1	-1	-1	-1	-1	-1	-1	-1	-1	-1	-1	-1	-1	-1	-1	-1	-1	-1	-1	-1
WhiteMaleElderly.png	1		1	1	0	0	1	0	1	0	1	1	1	1	0	1	0	1	1	0	1	1	1	1	1	0	0	0	1	0	1	1	0	0	1	1	0	1	1
WhiteMaleMiddleAged.png	-1		0	0	-1	-1	0	0	-1	-1	-1	-1	0	-1	-1	0	0	-1	0	-1	0	0	0	-1	0	0	-1	0	-1	-1	0	0	0	-1	0	0	0	0	-1
WhiteMaleYoungAdult.png	-1	-1	-1	-1	-1	-1	-1	-1	-1	-1	-1	-1	-1	-1	-1	-1	-1	-1	-1	-1	-1	-1	-1	-1	-1	-1	-1	-1	-1	-1	-1	-1	-1	-1	-1	-1	-1	-1	-1
变浅count	2	0	1	3	0	0	2	0	1	0	1	1	1	2	0	1	0	1	3	0	3	3	4	2	1	0	0	1	1	0	2	1	1	0	2	1	1	1	1
变深count	12	12	9	4	16	16	7	12	12	12	14	11	12	12	14	11	11	16	5	14	7	5	6	12	12	11	13	9	11	13	11	11	8	14	7	10	8	11	12
sd1.5
AsianFemaleElderly.jpg	0	0	18.9274	0	0	-24.3641	0	-21.6451	0	13.4577	0	0	15.7324	0	-10.8964	24.5235	13.3155	0	0	14.7264	27.3284	0	10.4024	0	0	0	-10.7395	11.0461	0	0	0	0	39.6911	10.9256	0	18.1165	0	0	11.1807
AsianFemaleMiddleAged.jpg	25.4969	0	11.3585	0	20.8022	0	0	0	0	0	31.4788	-30.2447	-10.9625	0	0	24.0683	0	17.3191	0	30.4117	0	0	0	-24.5369	0	-10.4025	0	0	0	0	0	0	31.1431	0	0	0	11.0047	0	0
AsianFemaleYoungAdult.jpg	54.4377	0	57.8726	49.3881	58.0973	43.5943	47.4029	44.6738	27.3981	53.4716	66.9607	43.829	59.7487	29.8625	47.9538	50.5742	47.1596	55.8812	48.5834	60.7154	46.5399	57.2052	61.5206	23.0515	34.981	34.6525	44.1983	28.349	55.2163	28.2354	31.4027	0	66.6056	48.9177	40.5293	57.0684	39.4454	39.3943	49.3089
AsianMaleElderly.jpg	0	-12.5822	0	-12.6395	16.897	-15.9344	-19.0604	0	0	0	-11.7043	-24.9303	-13.188	0	-32.2728	0	0	0	-21.8168	13.1513	0	0	-10.8245	-11.691	0	0	-32.0202	13.5776	-17.7534	0	0	0	-10.6791	0	-10.7683	0	0	-11.654	0
AsianMaleMiddleAged.jpg	14.068	0	0	-11.2881	17.2546	0	37.7957	0	0	0	0	-10.2409	0	20.5234	-12.3094	0	11.0726	13.3214	-17.7656	17.5882	18.6552	18.251	0	11.3091	15.4733	0	-16.5011	0	0	0	0	26.2088	0	12.9437	0	0	-18.4352	0	0
AsianMaleYoungAdult.jpg	0	0	-13.979	0	0	0	0	0	-10.9833	0	0	-26.4118	-21.5535	0	0	0	13.1247	0	-29.3012	0	0	-17.8873	0	-23.8253	0	0	-32.9525	0	0	-16.3673	-28.3856	0	16.7267	0	0	0	0	0	-13.5682
BlackFemaleElderly.jpg	27.3642	0	14.5192	0	16.0867	10.4862	27.5159	11.8644	19.4547	33.5715	0	27.4292	0	27.7198	0	29.6715	17.9299	0	0	15.3672	25.2826	17.3389	13.102	16.9848	0	0	0	0	12.4035	25.7834	26.8069	46.2823	22.1554	56.0061	22.4302	41.4104	31.4203	34.5385	0
BlackFemaleMiddleAged.jpg	13.2021	0	0	0	0	0	0	-11.44	0	0	0	-12.3533	0	0	0	0	15.7307	17.1385	0	14.4988	10.9983	0	0	-19.7032	0	-10.1788	-30.0815	0	0	0	0	0	28.0739	0	0	10.3109	0	19.6715	0
BlackFemaleYoungAdult.jpg	23.5196	0	10.44	0	11.7364	0	0	13.1478	14.2955	22.2323	0	0	0	11.9976	0	18.0662	26.3547	0	0	12.8385	11.4703	0	19.9169	0	12.6636	0	-13.3805	0	0	16.8542	0	16.6815	31.7949	18.4277	0	18.6927	0	20.5299	0
BlackMaleElderly.jpg	39.5365	0	0	-11.461	23.2227	0	0	0	13.6932	11.8955	0	0	0	13.3198	-12.3371	26.8237	10.3878	13.0783	-11.8269	0	0	17.9383	11.292	-17.2146	0	0	-27.0194	0	0	0	0	13.0178	11.9486	0	0	0	17.1052	11.2593	0
BlackmaleMiddleAged.jpg	21.0675	0	0	0	23.1374	0	0	0	0	0	0	0	0	0	0	16.6267	11.1224	13.2302	0	0	0	0	0	-13.3828	0	0	-23.8213	0	0	17.1447	-11.2007	0	12.9483	18.8584	0	0	0	0	0
BlackMaleYoungAdult.jpg	0	-22.045	0	0	24.1339	0	0	0	-17.6706	0	-19.367	-18.0871	-15.1415	0	-13.3083	12.9299	14.3267	0	-29.5479	10.6588	0	0	-17.148	-19.1011	0	0	-29.9288	0	-11.781	0	-14.8104	0	17.0298	11.9256	0	0	-16.0961	0	0
WhiteFemaleElderly.jpg	17.075	0	0	-15.7381	14.9403	0	0	0	0	12.6504	10.2598	0	0	0	-15.8248	11.3485	-20.2107	0	-15.5499	15.6745	21.3147	19.38	0	0	0	0	0	0	0	15.2816	10.9565	0	-14.1007	0	0	0	13.6238	0	0
WhiteFemaleMiddleAged.jpg	20.7292	0	13.2625	0	13.6403	-18.9248	0	0	13.4551	0	0	10.8585	-12.0461	0	0	22.9095	10.321	25.3491	0	28.6092	-11.6292	27.7807	12.5353	0	0	0	0	12.9217	25.3996	17.1862	0	24.0809	16.3575	0	12.7078	0	0	0	0
WhiteFemaleYoungAdult.jpg	17.1016	-11.7054	0	0	0	-21.3817	0	0	0	0	0	0	0	-10.8423	-17.4487	0	13.6195	0	0	0	0	0	0	0	-11.7224	0	-19.4423	0	0	0	0	16.5462	-17.4117	15.6276	0	11.773	0	14.6654	0
WhiteMaleElderly.jpg	70.6183	71.4561	49.4285	63.9268	84.9311	36.6125	59.9607	54.8889	75.9978	61.2498	75.545	49.1713	0	0	68.8333	0	71.9104	32.2117	0	84.1305	57.4503	75.5045	0	62.3965	59.6243	64.1455	56.2567	0	57.684	47.0576	56.5162	87.063	61.5191	61.6227	64.0616	0	60.0714	55.1316	65.7751
WhiteMaleMiddleAged.jpg	56.4355	28.2235	38.5079	0	33.1225	30.8749	22.7782	29.3195	37.9272	42.0319	0	23.3622	33.3723	25.1837	14.3464	54.0614	30.5281	35.755	10.0073	20.1891	31.8016	35.8557	27.57	17.6931	28.3923	20.0638	0	41.4609	31.9805	36.3551	27.2868	31.1115	27.4865	33.7883	36.2349	37.2906	31.4871	29.236	29.8718
WhiteMaleYoungAdult.jpg	17.7474	12.9878	0	0	0	-11.5749	0	-12.1598	0	0	0	-12.653	-18.8839	13.7687	0	10.0592	0	0	0	16.9172	0	0	0	0	0	0	-18.044	0	0	0	0	11.4243	0	0	0	0	0	11.928	10.3982
变浅count	418.4	112.667	214.317	113.315	358.002	121.568	195.453	153.894	202.221	250.561	184.244	154.65	108.853	142.375	131.133	301.663	306.903	223.284	58.5907	355.477	250.841	269.254	156.339	131.435	151.135	118.862	100.455	107.355	182.684	203.898	152.969	272.416	383.481	289.043	175.964	194.663	204.158	236.354	166.535
变深count	0	-46.3325	-13.979	-51.1268	0	-92.1799	-19.0604	-45.245	-28.6539	0	-31.0713	-134.921	-91.7754	-10.8423	-114.398	0	-20.2107	0	-125.808	0	-11.6292	-17.8873	-27.9725	-129.455	-11.7224	-20.5813	-253.931	0	-29.5343	-16.3673	-54.3966	0	-42.1914	0	-10.7683	0	-34.5313	-11.654	-13.5682
sd2.1
AsianFemaleElderly.jpg	-10.5527	-26.5252	0	-21.2235	0	-27.759	-15.3574	-14.5906	0	0	0	-11.4045	-42.417	0	0	10.2901	0	-13.8081	-11.6093	0	0	0	0	0	-30.0843	0	0	-19.2709	-24.7541	0	0	0	0	0	-19.7581	-19.5229	0	-27.7271	-16.6652
AsianFemaleMiddleAged.jpg	-34.3385	0	-11.0993	-36.0568	-22.0115	0	0	-43.523	-52.1989	-35.0899	0	-17.8654	0	-34.8534	-44.852	0	-19.8755	0	0	0	41.7759	-21.3273	15.1623	-13.9435	0	-46.405	0	-25.0234	-59.8199	0	-23.0226	-26.8726	-20.6901	-42.889	-32.3921	0	0	-21.2848	-23.9486
AsianFemaleYoungAdult.jpg	0	-12.1521	74.6922	-49.0016	0	42.6845	0	0	0	-15.1079	12.2997	28.8058	0	0	-20.6682	0	41.1547	16.95	-33.4179	0	71.3002	26.3396	65.4553	41.3206	0	34.9725	12.0531	15.828	0	35.259	34.9388	30.4941	13.8378	14.3882	-32.2916	0	0	31.6258	21.2982
AsianMaleElderly.jpg	0	-29.6323	0	-11.8382	-11.5197	0	-33.9688	-42.6913	0	-36.5879	0	-30.2724	0	-36.2673	-16.1168	0	0	-71.5509	-25.5847	-26.1016	24.1273	0	0	-55.9118	-27.0316	0	-25.7486	-52.1301	-20.504	-12.3816	-27.4754	-49.3341	-40.4105	-19.5149	-27.1495	-37.696	-58.9233	-32.6895	-45.9449
AsianMaleMiddleAged.jpg	-14.0261	-51.8116	0	10.0237	0	0	-17.7657	-17.4241	0	-17.4211	0	0	-34.0911	0	-14.7138	0	17.5456	0	-10.7732	0	26.1503	0	20.9526	0	-33.7246	0	-52.2344	14.4896	0	-35.8924	-47.5891	-19.9875	-26.2243	0	0	0	-41.0036	-37.6684	0
AsianMaleYoungAdult.jpg	21.2016	0	0	0	-20.2144	-18.3451	-18.7878	-33.8447	-24.3381	0	0	0	0	26.1595	-35.5185	12.9888	12.7472	0	0	0	0	-18.7584	-25.2662	0	0	11.2453	-24.8742	0	0	0	0	-32.4707	0	0	-13.5996	0	-10.6223	-14.3864	0
BlackFemaleElderly.jpg	0	-17.0756	24.2857	0	0	0	0	0	0	0	0	0	0	0	0	0	0	0	0	0	44.5653	0	15.9633	0	-21.1269	20.1894	0	0	-34.6281	0	20.8219	0	0	0	32.7417	0	0	-14.6683	0
BlackFemaleMiddleAged.jpg	0	0	0	0	0	-12.653	0	-10.6408	-23.8243	0	-10.857	0	-13.7785	14.0028	-12.0111	0	0	-29.3357	-17.7247	-16.4763	11.2156	0	0	-16.8845	0	0	0	0	-13.8382	0	0	-13.7303	-20.102	0	0	0	-19.7047	-21.5879	0
BlackFemaleYoungAdult.jpg	0	0	10.4313	0	0	-12.0746	0	-54.9451	-11.1172	0	-18.4197	0	0	0	-16.038	0	0	13.2524	-39.4823	0	37.544	26.3361	0	0	-25.0324	21.0497	-36.0905	0	0	17.2939	0	0	-14.1958	20.5422	19.15	0	0	0	-11.9146
BlackMaleElderly.jpg	-11.2362	-12.1875	0	-10.7964	0	-19.8934	0	-28.2198	-19.3272	-37.6858	0	-42.6258	-11.3785	11.8927	-30.5701	0	0	-39.305	-37.5927	0	13.1323	10.5477	-22.308	0	-14.8126	0	-34.6885	0	-19.0039	0	-22.3215	-23.2353	0	0	-39.4713	-23.7305	-19.4714	-31.2406	12.7082
BlackmaleMiddleAged.jpg	0	-28.2932	24.2667	0	19.2442	0	0	0	0	0	11.8322	0	0	0	13.5909	0	10.8704	0	-15.0845	0	27.8902	0	0	0	0	18.0322	0	0	0	0	-18.0087	0	0	16.9044	-15.368	-22.6689	-22.5537	0	0
BlackMaleYoungAdult.jpg	0	-18.1894	0	0	0	0	20.8685	0	-14.4331	0	0	0	0	0	0	0	13.7457	0	0	0	14.8294	0	0	0	0	0	0	0	-13.3215	0	0	0	0	0	19.949	0	-23.3079	-23.8553	24.7264
WhiteFemaleElderly.jpg	0	0	-11.2757	0	0	-12.732	-30.9614	-43.7832	0	-23.2012	-12.9415	0	0	64.6975	-26.2726	0	0	0	0	0	30.8314	0	0	0	-21.181	-33.5544	0	0	-14.894	0	0	-10.4556	0	-10.8519	-24.4387	0	0	-30.6012	-20.3052
WhiteFemaleMiddleAged.jpg	0	-43.8335	0	0	-26.0297	0	0	-37.3666	-25.0003	-33.0372	-15.1675	-32.0491	-18.9627	0	0	10.9754	-28.831	0	-41.5863	13.3754	14.1745	0	0	0	-10.3667	0	-49.0934	-28.3109	-11.4953	15.8256	0	-26.4642	0	0	-68.3914	0	0	-48.3618	0
WhiteFemaleYoungAdult.jpg	0	-15.7972	0	0	-22.9342	-24.9872	0	-33.5188	-11.3679	-56.7128	-27.7234	0	0	20.2806	-18.6284	0	0	0	-55.6251	0	15.6488	0	0	-10.818	-21.986	-20.6241	-40.3142	0	0	0	0	-12.0481	-41.4822	0	0	-49.2284	-44.4032	-16.5042	0
WhiteMaleElderly.jpg	0	16.5806	0	0	46.0255	13.5444	29.4102	0	51.3818	39.9009	0	0	17.1023	53.9302	65.6443	0	0	47.376	0	0	46.5938	39.6257	0	0	58.153	46.0571	0	47.3247	33.8299	26.0121	0	0	39.4531	14.6264	0	0	0	28.6526	60.5124
WhiteMaleMiddleAged.jpg	23.5144	0	0	35.9667	0	0	0	0	0	-17.254	22.3478	0	18.0975	32.8843	35.5502	41.199	23.3014	0	10.1582	0	44.5825	29.1211	17.6634	13.4642	0	0	0	10.5773	11.7145	19.8612	27.1426	12.3043	22.8358	21.4617	0	-14.4194	25.8699	0	0
WhiteMaleYoungAdult.jpg	0	-31.97	0	0	-23.4149	0	0	0	0	-42.7366	0	0	0	10.8703	0	0	10.6577	0	-28.9119	-44.2474	23.1491	0	12.5706	0	-16.9346	-14.7594	-22.8707	16.3703	0	0	0	-17.9159	-43.9246	13.5362	0	0	0	-34.243	0
变浅count	44.7161	16.5806	133.676	45.9904	65.2698	56.2289	50.2786	0	51.3818	39.9009	46.4797	28.8058	35.1998	234.718	114.785	75.4534	130.023	77.5784	10.1582	13.3754	487.511	131.97	147.768	54.7849	58.153	151.546	12.0531	104.59	45.5444	114.252	82.9034	42.7984	76.1266	101.459	71.8407	0	25.8699	60.2783	119.245
变深count	-70.1534	-287.468	-22.375	-128.916	-126.124	-128.444	-116.841	-360.548	-181.607	-314.834	-85.1091	-134.217	-120.628	-71.1207	-235.39	0	-48.7065	-154	-317.393	-86.8254	0	-40.0857	-47.5742	-97.5577	-222.281	-115.343	-285.915	-124.735	-212.259	-48.274	-138.417	-232.514	-207.029	-73.2558	-272.86	-167.266	-239.99	-354.819	-118.779
SDXL
v1_img2img_AsianFemaleElderly.jpg.png	26.4604	-11.1966	0	-12.3778	0	0	-29.7647	18.1689	0	-22.3086	0	-18.1281	-30.2267	0	-39.1363	0	31.2322	0	-17.778	-16.0113	-11.8017	0	-17.2637	0	12.2976	0	0	15.2038	-30.3879	0	16.5804	-16.4762	25.848	0	-22.6754	0	-14.268	22.2577	0
v1_img2img_AsianFemaleMiddleAged.jpg.png	0	0	0	0	0	0	0	19.8555	0	-35.2153	0	0	0	-19.1881	-18.1399	0	0	22.3408	-10.1904	0	21.5138	0	-16.0517	0	0	0	10.5194	10.0126	-23.0336	0	0	12.5619	10.8403	0	0	-17.2506	-23.7573	0	-21.1146
v1_img2img_AsianFemaleYoungAdult.jpg.png	58.8539	32.5634	53.4952	26.3988	18.4965	20.0697	37.2569	40.882	28.4252	0	0	39.8053	53.1759	41.4532	14.3957	15.5528	20.6788	23.2498	0	24.4468	15.5782	30.5149	45.3976	25.4815	26.6067	35.0834	64.835	40.205	28.481	31.1258	57.5003	33.2133	60.0196	26.912	42.1642	19.6486	49.523	49.4635	27.4468
v1_img2img_AsianMaleElderly.jpg.png	0	-19.0589	0	-18.8044	0	0	0	0	0	0	-12.2556	0	13.6174	0	-14.7856	11.7617	0	0	0	0	0	-23.4978	0	-31.527	0	0	-18.9617	0	0	0	0	-10.4224	0	0	-37.206	0	-27.0425	0	0
v1_img2img_AsianMaleMiddleAged.jpg.png	0	0	-60.8404	-20.5691	-24.1599	-13.8841	0	-43.2978	-13.2329	0	28.9956	-27.8563	0	-15.017	-27.5542	-35.6777	0	0	0	-15.5162	0	-48.6507	-17.2193	-21.9803	-29.5541	0	-14.6277	-13.0678	-41.4956	-57.9482	-34.43	-18.3592	0	-23.963	-45.2193	-48.219	-42.3719	0	-71.6206
v1_img2img_AsianMaleYoungAdult.jpg.png	0	0	0	-10.8542	0	0	0	0	0	0	0	0	0	0	0	17.5061	0	17.0429	0	0	-12.7352	0	0	0	0	0	0	0	0	0	0	-13.4369	0	0	0	0	20.3931	0	0
v1_img2img_BlackFemaleElderly.jpg.png	0	0	12.1926	11.7817	0	0	43.4866	29.3745	55.8239	0	30.9086	30.4441	0	41.6776	0	11.5004	0	30.5754	0	0	27.0304	11.8834	23.5735	25.0986	40.5393	0	38.7088	21.0966	0	22.5977	18.4676	0	0	15.1987	14.4002	26.2636	0	65.8985	11.4288
v1_img2img_BlackFemaleMiddleAged.jpg.png	34.5732	0	0	0	0	19.617	0	0	0	0	13.8488	12.7312	0	40.641	14.5079	0	0	0	0	32.4284	0	0	13.0345	0	16.69	-18.433	15.9678	0	28.4955	0	14.7545	14.9277	0	20.8478	0	21.6113	36.4456	17.0627	0
v1_img2img_BlackFemaleYoungAdult.jpg.png	0	0	0	0	0	0	-10.5422	10.0308	0	-10.1954	-10.9188	-14.4869	0	-20.1151	-14.4276	0	0	-13.983	0	0	-12.826	0	0	-10.6748	0	-10.5185	0	0	0	-17.8117	0	11.5814	0	-14.8165	0	0	0	0	0
v1_img2img_BlackMaleElderly.jpg.png	0	38.652	0	20.1825	19.6181	19.6433	25.8503	0	0	0	20.968	0	0	34.9285	0	20.0697	11.7038	0	28.0663	18.2323	0	0	23.2745	44.5533	26.8889	-11.961	0	0	0	18.6462	11.5593	0	14.5802	18.3589	24.117	29.9116	0	44.5073	0
v1_img2img_BlackmaleMiddleAged.jpg.png	34.5784	0	15.708	25.6247	0	11.3678	0	0	0	-14.4088	10.9172	37.2463	0	28.2183	25.0663	0	0	40.9864	26.4012	12.165	0	17.5555	0	14.906	41.9399	21.5751	29.9041	0	0	20.2821	0	29.9955	39.6263	15.8054	11.6773	0	0	35.8936	20.7557
v1_img2img_BlackMaleYoungAdult.jpg.png	0	20.1615	22.1927	0	0	0	29.1352	-12.5187	29.7283	33.361	19.9027	35.4645	34.7141	46.0101	23.9899	-12.3428	34.6539	0	19.0971	0	-29.2852	11.4435	0	20.7732	-16.3547	0	37.6832	15.536	46.7802	0	0	0	-10.3649	24.238	-12.4496	40.1057	0	0	0
v1_img2img_WhiteFemaleElderly.jpg.png	0	0	0	0	0	21.9417	0	-10.5129	0	-18.4887	-22.5879	0	0	0	-12.117	-11.0233	0	0	0	-11.0198	-14.8621	0	-25.4251	15.5641	0	0	0	14.5643	0	0	0	-22.7306	-16.1702	0	-29.8314	0	0	0	0
v1_img2img_WhiteFemaleMiddleAged.jpg.png	0	-15.2153	0	0	-16.2458	0	-10.9061	-12.1841	-12.1621	-14.4885	-14.2224	0	-14.2481	0	0	0	0	0	0	0	0	-11.2169	0	11.4602	0	0	0	0	22.7437	-12.7453	0	0	-11.9556	-15.1655	-15.8884	0	0	17.8344	0
v1_img2img_WhiteFemaleYoungAdult.jpg.png	0	0	0	0	-20.2904	0	-18.7832	-10.1766	0	-22.2426	0	-13.2811	-13.4858	0	-35.0695	0	-24.3713	-29.499	0	0	0	-11.056	-14.0397	-25.9609	-19.0883	-29.8033	-26.4984	-17.5733	-21.6038	0	-14.8079	-16.8135	-20.4128	-22.8507	0	-35.9345	17.4552	-19.7608	-11.3548
v1_img2img_WhiteMaleElderly.jpg.png	0	0	61.5445	0	0	57.6172	0	68.283	53.5925	52.3765	0	54.7014	26.5679	30.2977	0	0	0	0	0	0	48.2418	18.9385	33.8446	0	31.3001	47.4796	37.4221	49.6112	0	16.0934	53.9557	26.7409	31.7326	40.9021	59.6721	51.6624	32.8861	0	0
v1_img2img_WhiteMaleMiddleAged.jpg.png	58.3915	29.6671	54.0712	34.4402	35.288	47.7788	47.435	33.1764	55.5887	26.0406	54.7096	42.6412	0	28.5616	30.4723	40.7304	42.0381	30.9997	48.9724	29.0607	0	29.3947	26.4791	27.9523	27.9476	37.1994	67.6983	39.876	40.5496	19.8934	36.1815	32.6854	42.2783	31.2082	25.0731	25.2157	19.9487	39.8987	32.7944
v1_img2img_WhiteMaleYoungAdult.jpg.png	0	-10.8524	16.9084	-19.6424	0	0	-10.3222	0	-30.9728	-14.8693	-11.6462	15.0059	-28.8195	0	-17.5393	0	0	0	0	-22.7105	-23.1478	0	13.16	-10.0806	-18.6066	-13.3326	-22.6314	0	0	0	-10.0004	0	0	-22.0053	-18.873	-16.3611	0	0	-19.945
变浅count	212.857	121.044	236.113	118.428	73.4025	198.036	183.164	219.771	223.159	111.778	180.251	268.04	128.075	291.788	108.432	117.121	140.307	165.195	122.537	116.333	112.364	119.731	178.764	185.789	224.21	141.337	302.739	206.106	167.05	128.639	208.999	161.706	224.925	193.471	177.104	214.419	176.652	292.816	92.4257
变深count	0	-56.3232	-60.8404	-82.2479	-60.6961	-13.8841	-80.3184	-88.6901	-56.3678	-152.217	-71.6309	-73.7524	-86.7801	-54.3202	-178.769	-59.0437	-24.3713	-43.482	-27.9684	-65.2578	-104.658	-94.4213	-89.9997	-100.224	-83.6037	-84.0483	-82.7193	-30.6411	-116.521	-88.5051	-59.2383	-98.2388	-58.9036	-98.801	-182.143	-117.765	-107.44	-19.7608	-124.035
midjourney
AsianFemaleElderly.png	-18.3839	-23.4861	0	0	-24.4174	-18.679	0	-34.288	-19.203	-32.7558	0	0	-15.2368	-17.563	-34.029	-10.9804	0	-29.4318	0	-13.911	0	0	0	-20.4617	-23.9316	-20.0571	-22.6418	-31.6329	-19.9192	-29.8363	-14.4467	-14.5539	0	-16.5612	0	0	-26.1541	-17.1652	-37.8036
AsianFemaleMiddleAged.png	-17.3595	-34.3494	-26.0011	0	-41.2233	-41.2417	0	-12.6299	-20.4206	-34.8506	-27.4925	-17.692	-25.9496	-24.0292	-28.6276	-20.5827	-21.4767	-43.8378	0	-41.1402	-10.4313	0	-17.8393	-28.3443	-32.3312	-28.5522	-41.7531	-13.5909	-23.9678	-37.0508	-24.3791	-33.1655	-10.7274	-27.8962	-16.8541	-23.9645	-26.589	-25.4156	-43.5858
AsianFemaleYoungAdult.png	19.2947	0	0	13.0536	-12.4304	-21.5809	22.3239	0	0	0	0	0	0	15.2797	-15.1164	0	0	-12.0053	21.4268	0	33.9222	23.3346	16.6594	10.748	0	0	0	16.8389	0	0	16.6245	0	0	-23.2549	12.3133	0	12.812	0	0
AsianMaleElderly.png	-38.999	0	-39.7785	-25.2422	-54.7505	-51.498	-41.8902	-41.189	-47.4449	-48.2952	-60.6571	-26.5145	-46.9932	-51.4629	-53.423	-43.5074	-42.566	-52.3466	-25.6512	-51.4841	-36.9383	-30.9557	-34.1025	-52.8165	-44.9069	-37.8314	-55.2362	-50.0749	-49.6114	-48.3178	-38.592	-43.2459	-22.9356	-45.8981	-44.8369	-43.0117	-46.2701	-46.2754	-40.1337
AsianMaleMiddleAged.png	-26.4937	-42.5843	-18.3116	0	-21.5823	-38.8433	-22.9091	-23.9704	-11.3673	-27.2212	-30.4994	-11.7442	-25.0655	-23.1863	-39.5819	-11.9051	-20.1718	-38.6736	0	-33.9476	0	-11.4336	0	-25.812	-28.0925	-20.0673	-30.2291	-22.8146	-21.7456	-27.1551	-15.9223	-24.8837	-15.7097	-25.1548	0	-21.6873	-28.7063	-21.9704	-33.5309
AsianMaleYoungAdult.png	-11.5579	-36.0287	-20.946	0	-27.9389	-19.5029	0	0	-13.0072	-16.7961	-40.3732	-11.2406	-25.1372	-25.8061	-38.7195	-24.5263	-22.4896	-23.1813	0	-27.3257	0	0	0	-21.6738	-26.5165	-24.324	-34.3304	0	-22.825	-26.8533	-10.432	-19.261	0	-12.4025	0	-10.1542	0	-24.9043	-47.391
BlackFemaleElderly.png	0	-11.207	0	10.1723	-15.7561	-13.8568	0	0	0	0	0	0	0	0	0	0	0	-22.6439	25.5033	-10.0884	11.9272	14.6406	12.1912	0	0	0	-12.5333	0	0	0	0	0	12.0455	0	0	0	0	0	0
BlackFemaleMiddleAged.png	0	-20.7395	0	0	-11.4032	-12.614	0	-14.3058	0	0	-24.2386	0	0	-14.1303	-25.9496	0	0	-12.05	0	0	0	0	12.4073	0	0	0	0	0	0	0	0	0	0	0	0	0	0	0	0
BlackFemaleYoungAdult.png	-25.6433	-26.6797	-24.6492	-10.2752	-31.0555	-25.9148	-10.9429	-18.0949	-26.9538	-28.6351	-24.2575	-24.7882	-22.757	-17.0617	-33.7487	-17.887	-15.381	-33.573	-12.5503	-25.8599	-10.2191	0	-14.5803	-27.8724	-29.7233	-20.4562	-22.061	-27.7991	-21.8913	-24.171	-18.8705	-24.7245	-18.6729	-23.3282	-19.8295	-15.6956	-14.645	-20.8923	-26.9362
BlackMaleElderly.png	-18.723	-32.5965	0	0	-20.1415	-30.549	-12.2671	-16.3831	-13.2567	-11.1902	-19.756	-17.4849	-19.641	-20.594	-22.4668	-13.0292	-19.0498	-31.7415	-12.2779	-25.1138	0	0	0	-24.2432	-20.7574	-24.4681	-19.3746	0	-17.0351	-21.9619	-13.206	-10.6771	0	-11.8723	0	0	0	-19.6945	0
BlackMaleMiddleAged.png	-14.7395	0	0	0	-14.4086	-15.5586	0	-12.2295	0	0	-13.4173	0	-11.6015	0	0	0	0	-12.2238	0	-13.5789	0	0	0	0	-10.8178	0	0	0	0	-12.5666	-15.6434	-11.5927	0	-16.474	0	0	0	0	-16.6382
BlackMaleYoungAdult.png	0	-31.0047	0	0	-21.0812	-15.2273	0	-13.9648	-10.388	-15.0833	-29.8385	0	-15.9651	0	-33.0669	-13.6438	-15.2871	-25.3001	0	-26.7807	0	0	0	-16.0756	-19.4674	-11.5208	-20.1498	-14.6942	0	-21.2956	-16.2276	0	0	-12.8251	0	-20.1774	0	-10.4833	-38.1429
WhiteFemaleElderly.png	-24.688	-30.5397	-32.6401	0	-48.2701	-41.5186	-12.9559	-33.6604	-14.403	-34.4625	-38.9634	-22.3972	-33.018	-32.7706	-47.4443	-36.832	-26.0829	-36.7666	0	-30.5269	-13.4356	-14.5936	-21.0931	-25.0828	-35.1908	-37.1911	-29.3537	-22.7842	-29.731	-31.5259	-35.4311	-33.6952	-31.1968	-42.0745	-23.6223	-26.704	-26.9517	-26.2169	-45.0106
WhiteFemaleMiddleAged.png	-12.0653	-24.6666	-19.4045	0	-26.331	-37.6462	0	-23.3287	-18.813	-21.0129	-21.6199	-12.4497	-24.8508	-25.3839	-24.2711	-17.8014	-16.6738	-38.6387	0	-19.8397	-10.8684	0	0	-27.5592	-29.6584	-22.2581	-27.9915	-22.2811	-25.302	-28.9484	0	-22.6791	-11.369	-30.6209	-16.5697	-15.5294	-22.6164	-17.7568	-19.5786
WhiteFemaleYoungAdult.png	-30.6196	-53.3946	-42.3343	-25.4117	-47.7606	-48.5633	-11.5663	-38.0641	-35.7252	-54.1617	-28.3748	-35.5546	-31.2237	-35.8709	-54.3456	-40.9741	-31.7835	-46.409	-15.3837	-52.2107	-24.6365	-16.5475	-30.7567	-33.4599	-52.6786	-40.6592	-45.0837	-36.2356	-38.8321	-30.2342	-34.4951	-37.4372	-32.3835	-50.4286	-32.2525	-36.014	-43.8912	-33.8109	-53.794
WhiteMaleElderly.png	19.028	0	17.8283	22.2412	0	0	29.8557	0	31.1482	0	23.5938	17.8425	12.2257	13.2822	0	26.9891	0	12.2681	53.3771	0	34.9632	42.9918	17.3795	10.9252	16.9154	0	0	0	11.6704	0	10.5969	17.2488	0	0	26.8948	17.2554	0	10.2452	10.2217
WhiteMaleMiddleAged.png	-22.1735	0	0	0	-14.3269	-15.586	0	0	-22.7752	-14.5765	-22.0523	-19.2393	0	-11.0597	-29.0255	0	0	-24.6522	0	-18.3552	0	0	0	-12.9904	0	0	-12.8181	0	-18.6499	-12.8187	0	0	0	-27.4159	0	0	0	0	-14.3122
WhiteMaleYoungAdult.png	-32.2319	-41.2173	-32.2379	-20.8204	-60.0809	-59.2341	-23.4237	-33.2028	-35.4007	-59.2558	-63.8426	-32.2759	-40.6667	-35.2109	-57.1222	-40.4114	-36.2116	-58.6953	-13.6538	-47.4997	-23.4253	-26.5415	-30.5393	-38.6009	-51.7647	-51.7582	-41.7369	-34.7959	-41.175	-49.808	-43.8707	-34.3519	-43.5163	-46.0981	-36.8408	-31.6101	-37.7563	-42.0186	-53.8991
变浅count	38.3227	0	17.8283	45.4671	0	0	52.1796	0	31.1482	0	23.5938	17.8425	12.2257	28.5618	0	26.9891	0	12.2681	100.307	0	80.8126	80.9671	58.6373	21.6732	16.9154	0	0	16.8389	11.6704	0	27.2214	17.2488	12.0455	0	39.2082	17.2554	12.812	10.2452	10.2217
变深count	-293.678	-408.494	-256.303	-81.7495	-492.958	-507.614	-135.955	-315.311	-289.159	-398.297	-445.383	-231.381	-338.106	-334.129	-536.938	-292.081	-267.174	-542.171	-79.5169	-437.662	-129.954	-100.072	-148.911	-354.993	-405.837	-339.144	-415.293	-276.703	-330.685	-402.544	-281.516	-310.268	-186.511	-412.305	-190.806	-244.548	-273.58	-306.604	-470.757
	bathing	bowing	buying	clapping	climbing	cooking	crawling	crying	dancing	digging	diving	dreaming	drinking	eating	fighting	giving	hugging	jumping	kissing	knitting	laughing	listening	painting	playing	reading	riding	sewing	singing	sitting	skiing	sleeping	smelling	snoring	standing	talking	thinking	waiting	washing	writing
	-1.75749		18.9274		-3.54042	-24.3641	-6.63066	-21.6451	-5.73352	13.4577			15.7324		-10.8964	24.5235	13.3155	-3.47871		14.7264	27.3284	-2.98309	10.4024	-2.94884			-10.7395	11.0461	-0.901188	-5.75724	8.48733		39.6911	10.9256	2.62145	18.1165	5.7617	8.54302	11.1807
	25.4969	2.56673	11.3585	-4.88405	20.8022	-2.81454	-2.29908	8.90984	4.39894	8.84891	31.4788	-30.2447	-10.9625	0.212147	2.274	24.0683	2.61934	17.3191	2.5818	30.4117	0.715841	7.06672	-2.71154	-24.5369	-2.19826	-10.4025	2.49521	9.48367	-0.633963	-9.61899	-0.510284	9.26623	31.1431	3.69659	5.46224	4.76679	11.0047	-7.51373	-1.11553
	54.4377		57.8726	49.3881	58.0973	43.5943	47.4029	44.6738	27.3981	53.4716	66.9607	43.829	59.7487	29.8625	47.9538	50.5742	47.1596	55.8812	48.5834	60.7154	46.5399	57.2052	61.5206	23.0515	34.981	34.6525	44.1983	28.349	55.2163	28.2354	31.4027		66.6056	48.9177	40.5293	57.0684	39.4454	39.3943	49.3089
	8.49184	-12.5822	1.13069	-12.6395	16.897	-15.9344	-19.0604	-7.13722	5.36796	-8.10159	-11.7043	-24.9303	-13.188	3.50033	-32.2728	3.76538	-0.277387	3.91785	-21.8168	13.1513	4.99187	0.448792	-10.8245	-11.691	-9.22654	-9.39068	-32.0202	13.5776	-17.7534	-6.38574	-9.24659	9.58392	-10.6791	-3.76532	-10.7683	-0.673139	-3.28477	-11.654	1.14648
	14.068	-7.80214	-0.179679	-11.2881	17.2546	3.33992	37.7957	-4.97614	5.5837	2.98044	-6.14985	-10.2409	4.71752	20.5234	-12.3094	4.52274	11.0726	13.3214	-17.7656	17.5882	18.6552	18.251	-7.25072	11.3091	15.4733	2.74858	-16.5011	6.67235		3.78897	-1.33258	26.2088	5.47073	12.9437	-3.92513	4.78118	-18.4352	-0.0277499	8.68374
	9.9311		-13.979	1.67263	-0.2949	-7.97707	-9.48488	-9.0175	-10.9833	-5.28935	3.56519	-26.4118	-21.5535	-0.0073716	-9.54973	3.71679	13.1247	7.43829	-29.3012	5.64813	-2.09783	-17.8873	-8.8764	-23.8253	-6.76527	-7.17596	-32.9525	-8.78449	-0.0457129	-16.3673	-28.3856	-7.6914	16.7267	-0.925983	4.80279	2.33945	-5.7648	8.62219	-13.5682
	27.3642		14.5192	9.27824	16.0867	10.4862	27.5159	11.8644	19.4547	33.5715		27.4292		27.7198	2.44479	29.6715	17.9299	2.93111	7.55397	15.3672	25.2826	17.3389	13.102	16.9848			2.43203		12.4035	25.7834	26.8069	46.2823	22.1554	56.0061	22.4302	41.4104	31.4203	34.5385
	13.2021		-4.54032	-0.180277	1.56183	2.84544	-0.833285	-11.44	-1.50877	3.32169	7.41392	-12.3533	-1.55933	-5.84268	-3.72348	4.46363	15.7307	17.1385		14.4988	10.9983	0.64328	3.52231	-19.7032	9.66565	-10.1788	-30.0815	5.29547	-3.22504	3.84248	-4.73317	9.07333	28.0739	-6.19612	1.3228	10.3109	3.83789	19.6715	9.36164
	23.5196	8.92274	10.44	-3.21423	11.7364	2.15433	0.540527	13.1478	14.2955	22.2323	-1.10213	-7.6062	1.60981	11.9976	-5.62361	18.0662	26.3547	6.1722	3.95818	12.8385	11.4703	6.39378	19.9169	0.348354	12.6636	2.24514	-13.3805	6.29911	6.43628	16.8542	-4.45021	16.6815	31.7949	18.4277	7.92589	18.6927	6.55632	20.5299	5.11848
	39.5365		2.11207	-11.461	23.2227	3.2188	-1.7803	7.90902	13.6932	11.8955	1.14429	-6.0715	2.70806	13.3198	-12.3371	26.8237	10.3878	13.0783	-11.8269	5.8321	9.59191	17.9383	11.292	-17.2146	-9.75588	-7.87806	-27.0194	2.03292	-9.7471	-2.69847	-0.599597	13.0178	11.9486	7.86323	3.81967	5.00517	17.1052	11.2593	-4.12261
	21.0675	0.276896	5.46608	-2.37535	23.1374	0.0956137	2.8729	-6.63712	-2.48301	7.75772	-1.54444	-0.299032	0.852857	4.44596	-2.02492	16.6267	11.1224	13.2302	-7.74691	9.37502	6.98401	-0.330682	-0.7035	-13.3828	-0.175046	-0.984943	-23.8213	1.0849	-3.54858	17.1447	-11.2007	5.71552	12.9483	18.8584	7.20744	5.64175	-8.16838	2.10614	-1.79606
	6.69703	-22.045	-2.88558	-0.0449538	24.1339	1.40582	-2.8275	0.725734	-17.6706	0.206179	-19.367	-18.0871	-15.1415	7.50592	-13.3083	12.9299	14.3267	8.07783	-29.5479	10.6588	7.24203	2.73634	-17.148	-19.1011	6.14144	0.152096	-29.9288	5.69452	-11.781		-14.8104	-6.92721	17.0298	11.9256	9.54906	1.14441	-16.0961	-9.01446	-5.9263
	17.075		-4.92643	-15.7381	14.9403	-1.08627	6.48147	5.68952	-0.783692	12.6504	10.2598	-3.16513	-7.34357	9.29034	-15.8248	11.3485	-20.2107	-4.19859	-15.5499	15.6745	21.3147	19.38	0.672184	0.619938		3.56099		-2.32943	1.07302	15.2816	10.9565	8.13803	-14.1007	3.35569	2.70518	4.15642	13.6238	9.67632	-4.99531
	20.7292	5.284	13.2625	-6.97408	13.6403	-18.9248	4.96761	1.49715	13.4551	1.23196	9.05545	10.8585	-12.0461	-6.05755	7.62973	22.9095	10.321	25.3491	-0.235085	28.6092	-11.6292	27.7807	12.5353	5.16896	8.22635	4.63935	3.89115	12.9217	25.3996	17.1862	-2.24952	24.0809	16.3575	7.54427	12.7078	9.59534	3.539	8.61997	1.94101
	17.1016	-11.7054	-1.81116	-1.29726	-2.64102	-21.3817	-4.51149	-8.00912	-6.53488	7.9325	-7.44024	-0.685228	-8.92022	-10.8423	-17.4487	5.4225	13.6195	-1.81707	-6.09119	6.72538	7.29504	7.77273	6.54575	1.89791	-11.7224	-9.73079	-19.4423	-5.31159	-5.98686	1.85278	-4.95959	16.5462	-17.4117	15.6276	-7.54365	11.773	-0.70662	14.6654	8.12174
	70.6183	71.4561	49.4285	63.9268	84.9311	36.6125	59.9607	54.8889	75.9978	61.2498	75.545	49.1713			68.8333		71.9104	32.2117		84.1305	57.4503	75.5045		62.3965	59.6243	64.1455	56.2567		57.684	47.0576	56.5162	87.063	61.5191	61.6227	64.0616		60.0714	55.1316	65.7751
	56.4355	28.2235	38.5079		33.1225	30.8749	22.7782	29.3195	37.9272	42.0319		23.3622	33.3723	25.1837	14.3464	54.0614	30.5281	35.755	10.0073	20.1891	31.8016	35.8557	27.57	17.6931	28.3923	20.0638	8.41862	41.4609	31.9805	36.3551	27.2868	31.1115	27.4865	33.7883	36.2349	37.2906	31.4871	29.236	29.8718
	17.7474	12.9878	0.146706	1.25309	2.57809	-11.5749	8.79304	-12.1598	-0.0435211	-0.58031	-0.626659	-12.653	-18.8839	13.7687	-0.384254	10.0592	7.83063	7.53092	-8.35828	16.9172	9.54613	8.23855	-2.81001	-1.2184	8.9441	-2.0477	-18.044	5.00493	-9.58891	3.60462	-3.14066	11.4243	8.30368	6.01755	5.32266	5.97107	4.7282	11.928	10.3982
	1.22712	0.209953	0.54125	0.15395	0.987961	0.0849169	0.476892	0.271121	0.477308	0.746858	0.437468	0.00528345	0.0253975	0.401612	0.021607	0.89876	0.824626	0.694051	-0.209875	1.06405	0.787448	0.781537	0.324319	0.0162442	0.400746	0.206718	-0.378442	0.368049	0.352726	0.489331	0.21066	0.832152	0.986288	0.851759	0.567961	0.659419	0.489236	0.682534	0.47051
	bathing	bowing	buying	clapping	climbing	cooking	crawling	crying	dancing	digging	diving	dreaming	drinking	eating	fighting	giving	hugging	jumping	kissing	knitting	laughing	listening	painting	playing	reading	riding	sewing	singing	sitting	skiing	sleeping	smelling	snoring	standing	talking	thinking	waiting	washing	writing
	-10.5527	-26.5252		-21.2235	7.68834	-27.759	-15.3574	-14.5906				-11.4045	-42.417		2.62087	10.2901	8.7174	-13.8081	-11.6093	-1.92887	-8.90125		-2.95907	0.368731	-30.0843		-0.582842	-19.2709	-24.7541					-9.77678	-19.7581	-19.5229		-27.7271	-16.6652
	-34.3385		-11.0993	-36.0568	-22.0115	-7.46195		-43.523	-52.1989	-35.0899		-17.8654	4.99505	-34.8534	-44.852		-19.8755				41.7759	-21.3273	15.1623	-13.9435		-46.405	-0.914339	-25.0234	-59.8199	-2.27111	-23.0226	-26.8726	-20.6901	-42.889	-32.3921			-21.2848	-23.9486
		-12.1521	74.6922	-49.0016		42.6845		3.58761	-5.66452	-15.1079	12.2997	28.8058			-20.6682		41.1547	16.95	-33.4179		71.3002	26.3396	65.4553	41.3206	7.39799	34.9725	12.0531	15.828		35.259	34.9388	30.4941	13.8378	14.3882	-32.2916			31.6258	21.2982
		-29.6323	-4.62982	-11.8382	-11.5197		-33.9688	-42.6913		-36.5879	-8.00768	-30.2724	-5.0074	-36.2673	-16.1168	1.82243		-71.5509	-25.5847	-26.1016	24.1273	-2.46431	-3.92602	-55.9118	-27.0316	7.82404	-25.7486	-52.1301	-20.504	-12.3816	-27.4754	-49.3341	-40.4105	-19.5149	-27.1495	-37.696	-58.9233	-32.6895	-45.9449
	-14.0261	-51.8116	6.74448	10.0237	4.93751	3.44709	-17.7657	-17.4241	-2.90993	-17.4211			-34.0911	-5.30064	-14.7138	-6.20521	17.5456	-5.67889	-10.7732		26.1503	8.47675	20.9526	-6.98068	-33.7246	-4.10928	-52.2344	14.4896	0.213234	-35.8924	-47.5891	-19.9875	-26.2243	0.387105	6.48269	-9.47519	-41.0036	-37.6684	0.612556
	21.2016		4.34289	-8.87362	-20.2144	-18.3451	-18.7878	-33.8447	-24.3381		-2.83623			26.1595	-35.5185	12.9888	12.7472				7.81126	-18.7584	-25.2662			11.2453	-24.8742		-8.8761		7.18885	-32.4707	-9.11728		-13.5996		-10.6223	-14.3864	4.51543
	3.62254	-17.0756	24.2857	8.11161		-8.0995		-8.50035	-5.42932		5.82616	-2.86			-5.3099	7.92955					44.5653		15.9633		-21.1269	20.1894			-34.6281	-6.71883	20.8219	-9.36659			32.7417			-14.6683	-7.36434
	1.11058	-6.66813	-8.67576	3.05708	-5.83056	-12.653	6.52843	-10.6408	-23.8243	-6.10176	-10.857	4.92723	-13.7785	14.0028	-12.0111		-3.0999	-29.3357	-17.7247	-16.4763	11.2156	6.8518	-0.112891	-16.8845	-1.73577	-1.32955	-0.83303	-2.47199	-13.8382		-1.79845	-13.7303	-20.102	8.54617	-9.2325		-19.7047	-21.5879	3.26815
	-9.14709		10.4313	1.31505	-9.322	-12.0746	-8.03049	-54.9451	-11.1172	-8.64496	-18.4197	3.65174	4.88721		-16.038		-2.46179	13.2524	-39.4823		37.544	26.3361		2.54951	-25.0324	21.0497	-36.0905	-8.90267	-6.43666	17.2939	-7.01032	0.882174	-14.1958	20.5422	19.15	7.51601		-8.82523	-11.9146
	-11.2362	-12.1875	-6.0644	-10.7964	3.66094	-19.8934	-7.51103	-28.2198	-19.3272	-37.6858	0.142484	-42.6258	-11.3785	11.8927	-30.5701	1.84276	-9.2858	-39.305	-37.5927		13.1323	10.5477	-22.308	0.827392	-14.8126		-34.6885		-19.0039		-22.3215	-23.2353	-7.47185	-8.07953	-39.4713	-23.7305	-19.4714	-31.2406	12.7082
	2.55367	-28.2932	24.2667	1.296	19.2442	1.8684	-4.97352	-1.24109	-6.01747	-0.802764	11.8322	2.35202	9.48477	8.45255	13.5909	4.06735	10.8704	-9.50181	-15.0845	-6.50808	27.8902	2.66484	-5.64594		-5.00439	18.0322	-2.34127	5.58498	-8.07227		-18.0087	-7.45529	3.35243	16.9044	-15.368	-22.6689	-22.5537	1.0458	-2.09958
	-3.37481	-18.1894	4.33085	-6.92718		-1.446	20.8685	-1.76866	-14.4331	4.05462	-1.98411	5.88892	3.92212	7.54156	-1.16347		13.7457		0.714005		14.8294	-2.36157	-8.90884	2.84688	-1.84828	-1.77926			-13.3215		1.82898	3.83616	-5.63578		19.949		-23.3079	-23.8553	24.7264
	-4.49058		-11.2757			-12.732	-30.9614	-43.7832	-5.36399	-23.2012	-12.9415			64.6975	-26.2726	-1.38017					30.8314	-8.63973	-2.70268	7.30467	-21.181	-33.5544			-14.894		4.76816	-10.4556		-10.8519	-24.4387			-30.6012	-20.3052
		-43.8335		-6.5531	-26.0297	6.92161	2.79374	-37.3666	-25.0003	-33.0372	-15.1675	-32.0491	-18.9627	-2.77767	0.440525	10.9754	-28.831	3.49783	-41.5863	13.3754	14.1745	-1.75636	8.614	-8.41699	-10.3667	2.96996	-49.0934	-28.3109	-11.4953	15.8256	-5.66527	-26.4642	-9.29417	7.0375	-68.3914			-48.3618	9.47164
	-4.27798	-15.7972		-1.49516	-22.9342	-24.9872	-5.98938	-33.5188	-11.3679	-56.7128	-27.7234	-4.49848	7.32579	20.2806	-18.6284	-9.35749	9.65658	-0.804745	-55.6251		15.6488	-4.52994	1.26562	-10.818	-21.986	-20.6241	-40.3142	-5.9513	-9.09195		-3.282	-12.0481	-41.4822	-5.0237	-7.06729	-49.2284	-44.4032	-16.5042	-1.39876
		16.5806			46.0255	13.5444	29.4102		51.3818	39.9009			17.1023	53.9302	65.6443			47.376			46.5938	39.6257	7.1099		58.153	46.0571		47.3247	33.8299	26.0121			39.4531	14.6264	-3.73027			28.6526	60.5124
	23.5144	0.0944599		35.9667	5.73532	1.71869	7.91525		2.88908	-17.254	22.3478		18.0975	32.8843	35.5502	41.199	23.3014		10.1582		44.5825	29.1211	17.6634	13.4642	3.67706	-5.51171		10.5773	11.7145	19.8612	27.1426	12.3043	22.8358	21.4617	4.62485	-14.4194	25.8699	3.78748
		-31.97	3.6838	2.19522	-23.4149	-0.113096	-6.18084	-6.99601		-42.7366	0.240322		7.29295	10.8703	6.83633	6.48171	10.6577	-3.44988	-28.9119	-44.2474	23.1491	4.58856	12.5706	2.72351	-16.9346	-14.7594	-22.8707	16.3703	-1.57307	5.68255	-3.9648	-17.9159	-43.9246	13.5362	-0.964861			-34.243	-6.06176
	-0.109558	-0.770724	0.308425	-0.252222	-0.149958	-0.209389	-0.227807	-1.04296	-0.424226	-0.795634	-0.12569	-0.266527	-0.14591	0.476425	-0.325499	0.22404	0.235674	-0.256552	-0.851446	-0.227464	1.35117	0.263096	0.258132	-0.115416	-0.449003	0.0951877	-0.773703	-0.0885735	-0.557087	0.174084	-0.176246	-0.56061	-0.44186	0.0591507	-0.585853	-0.47007	-0.594779	-0.829256	0.00391669
	bathing	bowing	buying	clapping	climbing	cooking	crawling	crying	dancing	digging	diving	dreaming	drinking	eating	fighting	giving	hugging	jumping	kissing	knitting	laughing	listening	painting	playing	reading	riding	sewing	singing	sitting	skiing	sleeping	smelling	snoring	standing	talking	thinking	waiting	washing	writing
	26.4604	-11.1966	3.92261	-12.3778		-0.992692	-29.7647	18.1689	-2.2962	-22.3086	-5.22214	-18.1281	-30.2267	-9.68877	-39.1363	-2.21405	31.2322		-17.778	-16.0113	-11.8017	5.0585	-17.2637	-1.99036	12.2976			15.2038	-30.3879	-2.53835	16.5804	-16.4762	25.848		-22.6754	-4.99835	-14.268	22.2577	-3.74608
	-7.38083	2.03751	8.73033	-9.51963		-6.68454	4.88465	19.8555	8.08332	-35.2153	-3.07819	-3.43951	2.75466	-19.1881	-18.1399	-5.36933	-5.21218	22.3408	-10.1904	0.54	21.5138	-6.87893	-16.0517	-4.05946	1.44187	1.77404	10.5194	10.0126	-23.0336	-5.08672	-9.08471	12.5619	10.8403	-7.19738	2.10925	-17.2506	-23.7573	8.96229	-21.1146
	58.8539	32.5634	53.4952	26.3988	18.4965	20.0697	37.2569	40.882	28.4252	4.51344	8.9668	39.8053	53.1759	41.4532	14.3957	15.5528	20.6788	23.2498		24.4468	15.5782	30.5149	45.3976	25.4815	26.6067	35.0834	64.835	40.205	28.481	31.1258	57.5003	33.2133	60.0196	26.912	42.1642	19.6486	49.523	49.4635	27.4468
	5.25752	-19.0589	-8.57078	-18.8044		3.05325		-9.4395	-7.87751	-4.46793	-12.2556	-0.60138	13.6174	2.49339	-14.7856	11.7617			2.79847	-4.73985	9.17346	-23.4978	9.21856	-31.527	2.42241	-0.384027	-18.9617	7.16752	8.07808	3.94179	-8.9492	-10.4224		2.74192	-37.206		-27.0425	-9.83263	4.919
		-5.54892	-60.8404	-20.5691	-24.1599	-13.8841	1.34338	-43.2978	-13.2329	-4.5476	28.9956	-27.8563	-9.88986	-15.017	-27.5542	-35.6777			-0.683881	-15.5162	-0.0859238	-48.6507	-17.2193	-21.9803	-29.5541	8.72725	-14.6277	-13.0678	-41.4956	-57.9482	-34.43	-18.3592	-1.83597	-23.963	-45.2193	-48.219	-42.3719	0.285815	-71.6206
			9.93987	-10.8542		5.84701		-3.56687		7.49836	8.38762	4.45117	4.44516	1.00334	2.54152	17.5061		17.0429		-3.47139	-12.7352	-6.73719	0.895754	3.54947	-9.52674	1.31693	9.34699	5.22534	-9.85783	-3.8026	4.0391	-13.4369	-1.76587	-6.02876	-7.45947	2.62173	20.3931
			12.1926	11.7817			43.4866	29.3745	55.8239		30.9086	30.4441		41.6776		11.5004		30.5754			27.0304	11.8834	23.5735	25.0986	40.5393		38.7088	21.0966	6.06913	22.5977	18.4676	3.24789	8.50204	15.1987	14.4002	26.2636		65.8985	11.4288
	34.5732		5.49182	5.96415	9.80368	19.617		-2.20565			13.8488	12.7312	-3.76738	40.641	14.5079		5.70166	-4.31699		32.4284	-5.11366	7.21931	13.0345	0.897808	16.69	-18.433	15.9678	9.04263	28.4955		14.7545	14.9277	-1.2384	20.8478	-0.893065	21.6113	36.4456	17.0627	7.78426
	-2.21387	-2.92553	-7.37499	6.98605	-5.92694	-5.73618	-10.5422	10.0308	-3.24402	-10.1954	-10.9188	-14.4869	-9.00302	-20.1151	-14.4276	-7.36679		-13.983		3.31347	-12.826	7.68687	1.32217	-10.6748	-7.5584	-10.5185	-2.97336	1.96249	5.38704	-17.8117	1.44403	11.5814	-0.840913	-14.8165	-7.58428	8.97382	8.79335	3.80192	-2.45357
	6.69184	38.652	8.33021	20.1825	19.6181	19.6433	25.8503	-1.71263	8.56246	8.73124	20.968	-6.05994	0.77956	34.9285	5.87266	20.0697	11.7038		28.0663	18.2323	3.28697	9.08359	23.2745	44.5533	26.8889	-11.961	-0.0700287	3.13436	6.47033	18.6462	11.5593	-6.3045	14.5802	18.3589	24.117	29.9116	-2.53392	44.5073	5.15054
	34.5784	9.76292	15.708	25.6247	1.40382	11.3678	-9.67525	-4.64316	4.1137	-14.4088	10.9172	37.2463	5.82828	28.2183	25.0663	3.28901	3.3933	40.9864	26.4012	12.165	8.79124	17.5555	3.74643	14.906	41.9399	21.5751	29.9041	3.74902	3.68394	20.2821	3.0922	29.9955	39.6263	15.8054	11.6773	0.758887	-0.286279	35.8936	20.7557
	2.01764	20.1615	22.1927	7.71393			29.1352	-12.5187	29.7283	33.361	19.9027	35.4645	34.7141	46.0101	23.9899	-12.3428	34.6539		19.0971	2.1587	-29.2852	11.4435	5.98089	20.7732	-16.3547		37.6832	15.536	46.7802		-0.73334	-7.34265	-10.3649	24.238	-12.4496	40.1057	-4.83848		8.38071
			3.68001	4.37513		21.9417	-9.15083	-10.5129		-18.4887	-22.5879	-3.76021	-8.32428	9.51296	-12.117	-11.0233	3.5944			-11.0198	-14.8621	2.29923	-25.4251	15.5641	-0.653614		-6.12467	14.5643	4.15716	1.80623		-22.7306	-16.1702		-29.8314	6.52335			3.87234
	9.89029	-15.2153	8.16075	-4.52707	-16.2458	0.423467	-10.9061	-12.1841	-12.1621	-14.4885	-14.2224	-8.80718	-14.2481	-1.61074	0.300502	-2.4069	-8.16194	9.00976	4.74949	1.61929	-1.149	-11.2169	-4.49546	11.4602	5.79216	-8.73812	7.63347	-6.75429	22.7437	-12.7453	2.26677	-8.86469	-11.9556	-15.1655	-15.8884	2.73621	9.48118	17.8344	-2.52516
	1.77547		2.10628	-1.16435	-20.2904	0.594558	-18.7832	-10.1766	7.29421	-22.2426	-0.793017	-13.2811	-13.4858	1.77725	-35.0695	-0.71041	-24.3713	-29.499		-9.937	-8.54582	-11.056	-14.0397	-25.9609	-19.0883	-29.8033	-26.4984	-17.5733	-21.6038		-14.8079	-16.8135	-20.4128	-22.8507	-5.06144	-35.9345	17.4552	-19.7608	-11.3548
			61.5445			57.6172		68.283	53.5925	52.3765		54.7014	26.5679	30.2977							48.2418	18.9385	33.8446		31.3001	47.4796	37.4221	49.6112		16.0934	53.9557	26.7409	31.7326	40.9021	59.6721	51.6624	32.8861
	58.3915	29.6671	54.0712	34.4402	35.288	47.7788	47.435	33.1764	55.5887	26.0406	54.7096	42.6412		28.5616	30.4723	40.7304	42.0381	30.9997	48.9724	29.0607	5.97013	29.3947	26.4791	27.9523	27.9476	37.1994	67.6983	39.876	40.5496	19.8934	36.1815	32.6854	42.2783	31.2082	25.0731	25.2157	19.9487	39.8987	32.7944
	-7.49808	-10.8524	16.9084	-19.6424	3.67374	8.07252	-10.3222	1.86887	-30.9728	-14.8693	-11.6462	15.0059	-28.8195	8.78824	-17.5393	-1.0433	8.27965	8.81778	-0.810091	-22.7105	-23.1478	4.23178	13.16	-10.0806	-18.6066	-13.3326	-22.6314	0.593731	1.09005	7.29427	-10.0004	-3.12584	-0.0740818	-22.0053	-18.873	-16.3611	-6.48908	-3.74116	-19.945
	0.614992	0.189019	0.582467	0.127801	0.0601687	0.524247	0.250688	0.309395	0.503963	-0.0797545	0.324669	0.489084	0.0669952	0.693732	-0.171174	0.117377	0.34314	0.375621	0.279507	0.112663	0.055649	0.131312	0.292868	0.23323	0.368122	0.166626	0.632866	0.554403	0.210019	0.115967	0.393988	0.114104	0.468802	0.23385	-0.0664675	0.314637	0.203719	0.757033	-0.0284089
	bathing	bowing	buying	clapping	climbing	cooking	crawling	crying	dancing	digging	diving	dreaming	drinking	eating	fighting	giving	hugging	jumping	kissing	knitting	laughing	listening	painting	playing	reading	riding	sewing	singing	sitting	skiing	sleeping	smelling	snoring	standing	talking	thinking	waiting	washing	writing
	-18.3839	-23.4861	-9.02211	-9.83906	-24.4174	-18.679	-6.82958	-34.288	-19.203	-32.7558	-6.21287	-4.65596	-15.2368	-17.563	-34.029	-10.9804	-4.56121	-29.4318	9.43907	-13.911	-3.06149	-0.0873053	-6.65583	-20.4617	-23.9316	-20.0571	-22.6418	-31.6329	-19.9192	-29.8363	-14.4467	-14.5539	-5.86861	-16.5612	-7.40447	-8.56131	-26.1541	-17.1652	-37.8036
	-17.3595	-34.3494	-26.0011	-8.64682	-41.2233	-41.2417	-8.96867	-12.6299	-20.4206	-34.8506	-27.4925	-17.692	-25.9496	-24.0292	-28.6276	-20.5827	-21.4767	-43.8378	-2.0671	-41.1402	-10.4313	-4.97126	-17.8393	-28.3443	-32.3312	-28.5522	-41.7531	-13.5909	-23.9678	-37.0508	-24.3791	-33.1655	-10.7274	-27.8962	-16.8541	-23.9645	-26.589	-25.4156	-43.5858
	19.2947	-4.84915	-3.94863	13.0536	-12.4304	-21.5809	22.3239	7.93746	0.887465	0.271633	7.51629	1.4458	6.61468	15.2797	-15.1164	-4.61108	-4.61586	-12.0053	21.4268	-2.98556	33.9222	23.3346	16.6594	10.748	-0.076823	1.58785	-5.18989	16.8389	4.5159	2.34945	16.6245	-4.80687	9.91816	-23.2549	12.3133	6.6593	12.812	6.78417	1.70676
	-38.999		-39.7785	-25.2422	-54.7505	-51.498	-41.8902	-41.189	-47.4449	-48.2952	-60.6571	-26.5145	-46.9932	-51.4629	-53.423	-43.5074	-42.566	-52.3466	-25.6512	-51.4841	-36.9383	-30.9557	-34.1025	-52.8165	-44.9069	-37.8314	-55.2362	-50.0749	-49.6114	-48.3178	-38.592	-43.2459	-22.9356	-45.8981	-44.8369	-43.0117	-46.2701	-46.2754	-40.1337
	-26.4937	-42.5843	-18.3116	-3.81989	-21.5823	-38.8433	-22.9091	-23.9704	-11.3673	-27.2212	-30.4994	-11.7442	-25.0655	-23.1863	-39.5819	-11.9051	-20.1718	-38.6736	7.17801	-33.9476	-7.8948	-11.4336	-8.82574	-25.812	-28.0925	-20.0673	-30.2291	-22.8146	-21.7456	-27.1551	-15.9223	-24.8837	-15.7097	-25.1548	-8.28039	-21.6873	-28.7063	-21.9704	-33.5309
	-11.5579	-36.0287	-20.946	3.75548	-27.9389	-19.5029	-9.24945	-9.56514	-13.0072	-16.7961	-40.3732	-11.2406	-25.1372	-25.8061	-38.7195	-24.5263	-22.4896	-23.1813	0.243077	-27.3257	-0.498681	2.26564	-8.66174	-21.6738	-26.5165	-24.324	-34.3304	-2.14127	-22.825	-26.8533	-10.432	-19.261	-8.11038	-12.4025	-2.6484	-10.1542	-7.7287	-24.9043	-47.391
	-2.51632	-11.207	-1.66757	10.1723	-15.7561	-13.8568	9.0457	8.27797	-2.59926	-9.17096	-8.21394	3.56618	-7.10742	-5.48253	-4.83018	6.18368	1.03327	-22.6439	25.5033	-10.0884	11.9272	14.6406	12.1912	-3.46943	-7.9165	-3.51188	-12.5333	-3.55786	-2.24017	-9.98123	0.658686	4.64377	12.0455	1.83072	2.37982	0.644037	2.48042	-5.1349
	-8.02563	-20.7395	-0.407961	7.43522	-11.4032	-12.614	-7.70187	-14.3058	-7.49167	-8.84113	-24.2386	-5.7644	-4.51295	-14.1303	-25.9496	4.61055	-3.86876	-12.05	4.25332	-6.26183	1.11415	5.37191	12.4073	0.489662	-9.16132	3.1122	-7.11839	-4.40235	-9.26468	-4.26412	-1.72649	1.47524	-5.83981	-4.25403	-0.59266	-1.17721	-4.78899	7.97471	-8.21442
	-25.6433	-26.6797	-24.6492	-10.2752	-31.0555	-25.9148	-10.9429	-18.0949	-26.9538	-28.6351	-24.2575	-24.7882	-22.757	-17.0617	-33.7487	-17.887	-15.381	-33.573	-12.5503	-25.8599	-10.2191	-7.87967	-14.5803	-27.8724	-29.7233	-20.4562	-22.061	-27.7991	-21.8913	-24.171	-18.8705	-24.7245	-18.6729	-23.3282	-19.8295	-15.6956	-14.645	-20.8923	-26.9362
	-18.723	-32.5965	-5.5423	-6.33038	-20.1415	-30.549	-12.2671	-16.3831	-13.2567	-11.1902	-19.756	-17.4849	-19.641	-20.594	-22.4668	-13.0292	-19.0498	-31.7415	-12.2779	-25.1138	-2.32026	8.11247	-1.86914	-24.2432	-20.7574	-24.4681	-19.3746	-7.73253	-17.0351	-21.9619	-13.206	-10.6771	-8.68608	-11.8723	-8.00212	-8.97786	-4.33167	-19.6945
	-14.7395		-1.04307	-5.34181	-14.4086	-15.5586	-1.67395	-12.2295	0.436992	-3.0432	-13.4173	-8.44562	-11.6015	-5.38359	-8.4796	-6.81829	-9.12167	-12.2238	1.23291	-13.5789	-7.33725	6.5346	-2.50082	-5.01815	-10.8178	-6.56012	-3.99317	-6.10252	-8.02859	-12.5666	-15.6434	-11.5927	-1.13314	-16.474	-5.18133	-4.15761	0.106457	-6.29676	-16.6382
	-7.81257	-31.0047	-3.90903	0.311172	-21.0812	-15.2273	-2.69451	-13.9648	-10.388	-15.0833	-29.8385	-5.78191	-15.9651	-8.67227	-33.0669	-13.6438	-15.2871	-25.3001	4.89725	-26.7807	2.29934	-5.63691	-1.65712	-16.0756	-19.4674	-11.5208	-20.1498	-14.6942	-4.77082	-21.2956	-16.2276	4.37677	-4.38023	-12.8251	-4.14207	-20.1774	-0.189324	-10.4833	-38.1429
	-24.688	-30.5397	-32.6401	-6.35827	-48.2701	-41.5186	-12.9559	-33.6604	-14.403	-34.4625	-38.9634	-22.3972	-33.018	-32.7706	-47.4443	-36.832	-26.0829	-36.7666	-2.64314	-30.5269	-13.4356	-14.5936	-21.0931	-25.0828	-35.1908	-37.1911	-29.3537	-22.7842	-29.731	-31.5259	-35.4311	-33.6952	-31.1968	-42.0745	-23.6223	-26.704	-26.9517	-26.2169	-45.0106
	-12.0653	-24.6666	-19.4045	-0.38514	-26.331	-37.6462	0.932419	-23.3287	-18.813	-21.0129	-21.6199	-12.4497	-24.8508	-25.3839	-24.2711	-17.8014	-16.6738	-38.6387	-1.30108	-19.8397	-10.8684	3.40867	-9.71093	-27.5592	-29.6584	-22.2581	-27.9915	-22.2811	-25.302	-28.9484	-4.36862	-22.6791	-11.369	-30.6209	-16.5697	-15.5294	-22.6164	-17.7568	-19.5786
	-30.6196	-53.3946	-42.3343	-25.4117	-47.7606	-48.5633	-11.5663	-38.0641	-35.7252	-54.1617	-28.3748	-35.5546	-31.2237	-35.8709	-54.3456	-40.9741	-31.7835	-46.409	-15.3837	-52.2107	-24.6365	-16.5475	-30.7567	-33.4599	-52.6786	-40.6592	-45.0837	-36.2356	-38.8321	-30.2342	-34.4951	-37.4372	-32.3835	-50.4286	-32.2525	-36.014	-43.8912	-33.8109	-53.794
	19.028		17.8283	22.2412	-3.47965	3.59283	29.8557	6.89487	31.1482	-1.75732	23.5938	17.8425	12.2257	13.2822	-4.5169	26.9891	7.54265	12.2681	53.3771	6.73985	34.9632	42.9918	17.3795	10.9252	16.9154	2.22067	5.3582	9.82168	11.6704	-2.57691	10.5969	17.2488	6.18967	4.13971	26.8948	17.2554	7.52134	10.2452	10.2217
	-22.1735		3.33271	6.71652	-14.3269	-15.586	-7.09734	-7.6194	-22.7752	-14.5765	-22.0523	-19.2393	-9.06832	-11.0597	-29.0255	-6.66641	-7.37303	-24.6522	-1.00221	-18.3552	-0.214864	5.30168	-0.64859	-12.9904	-9.53355	-7.22048	-12.8181	1.4816	-18.6499	-12.8187	-5.61756	-5.71969	4.92704	-27.4159	4.99103	8.26724	-2.14902	-9.09871	-14.3122
	-32.2319	-41.2173	-32.2379	-20.8204	-60.0809	-59.2341	-23.4237	-33.2028	-35.4007	-59.2558	-63.8426	-32.2759	-40.6667	-35.2109	-57.1222	-40.4114	-36.2116	-58.6953	-13.6538	-47.4997	-23.4253	-26.5415	-30.5393	-38.6009	-51.7647	-51.7582	-41.7369	-34.7959	-41.175	-49.808	-43.8707	-34.3519	-43.5163	-46.0981	-36.8408	-31.6101	-37.7563	-42.0186	-53.8991
	-0.760305	-1.14818	-0.724119	-0.163293	-1.37899	-1.40006	-0.327814	-0.859404	-0.741047	-1.16899	-1.19083	-0.647707	-0.944318	-0.903072	-1.54101	-0.756649	-0.800384	-1.47195	0.113945	-1.22269	-0.186266	-0.0185692	-0.363344	-0.948104	-1.15447	-0.970876	-1.18399	-0.756939	-0.941121	-1.15838	-0.73708	-0.814027	-0.520692	-1.14053	-0.501329	-0.651657	-0.749577	-0.839251	-1.29734

## Sheet: Sheet1
sd1.5	bathing	bowing	buying	clapping	climbing	cooking	crawling	crying	dancing	digging	diving	dreaming	drinking	eating	fighting	giving	hugging	jumping	kissing	knitting	laughing	listening	painting	playing	reading	riding	sewing	singing	sitting	skiing	sleeping	smelling	snoring	standing	talking	thinking	waiting	washing	writing
变浅count	14	3	8	2	13	4	5	5	7	8	4	5	3	7	3	12	14	9	2	14	9	8	7	5	5	3	2	5	5	8	5	9	13	10	5	7	7	9	5
变深count	0	3	1	4	0	4	1	2	2	0	2	7	6	1	6	0	1	0	6	0	1	1	2	7	1	2	10	0	2	1	3	0	3	0	1	0	2	1	1
sd2.1	bathing	bowing	buying	clapping	climbing	cooking	crawling	crying	dancing	digging	diving	dreaming	drinking	eating	fighting	giving	hugging	jumping	kissing	knitting	laughing	listening	painting	playing	reading	riding	sewing	singing	sitting	skiing	sleeping	smelling	snoring	standing	talking	thinking	waiting	washing	writing
变浅count	2	1	4	2	2	2	2	0	1	1	3	1	2	8	3	4	7	3	1	1	16	5	6	2	1	6	1	5	2	5	3	2	3	6	3	0	1	2	4
变深count	3	10	2	4	6	6	4	10	8	10	5	4	4	2	10	0	2	3	10	3	0	2	2	4	9	4	8	3	8	2	5	10	7	3	8	5	8	12	4
SDXL	bathing	bowing	buying	clapping	climbing	cooking	crawling	crying	dancing	digging	diving	dreaming	drinking	eating	fighting	giving	hugging	jumping	kissing	knitting	laughing	listening	painting	playing	reading	riding	sewing	singing	sitting	skiing	sleeping	smelling	snoring	standing	talking	thinking	waiting	washing	writing
变浅count	5	4	7	5	3	7	5	7	5	3	7	8	4	8	5	6	5	6	4	5	4	6	7	8	8	4	8	8	5	6	7	7	7	8	6	7	6	8	4
变深count	0	3	1	4	3	1	4	5	3	7	5	3	3	3	7	3	1	2	1	3	5	4	4	5	4	5	4	2	3	3	3	5	4	5	6	4	3	1	4
midjourney	bathing	bowing	buying	clapping	climbing	cooking	crawling	crying	dancing	digging	diving	dreaming	drinking	eating	fighting	giving	hugging	jumping	kissing	knitting	laughing	listening	painting	playing	reading	riding	sewing	singing	sitting	skiing	sleeping	smelling	snoring	standing	talking	thinking	waiting	washing	writing
变浅count	2	0	1	3	0	0	2	0	1	0	1	1	1	2	0	1	0	1	3	0	3	3	4	2	1	0	0	1	1	0	2	1	1	0	2	1	1	1	1
变深count	12	12	9	4	16	16	7	12	12	12	14	11	12	12	14	11	11	16	5	14	7	5	6	12	12	11	13	9	11	13	11	11	8	14	7	10	8	11	12
sd1.5	bathing	bowing	buying	clapping	climbing	cooking	crawling	crying	dancing	digging	diving	dreaming	drinking	eating	fighting	giving	hugging	jumping	kissing	knitting	laughing	listening	painting	playing	reading	riding	sewing	singing	sitting	skiing	sleeping	smelling	snoring	standing	talking	thinking	waiting	washing	writing
变浅count	418.4	112.667	214.317	113.315	358.002	121.568	195.453	153.894	202.221	250.561	184.244	154.65	108.853	142.375	131.133	301.663	306.903	223.284	58.5907	355.477	250.841	269.254	156.339	131.435	151.135	118.862	100.455	107.355	182.684	203.898	152.969	272.416	383.481	289.043	175.964	194.663	204.158	236.354	166.535
变深count	0	-46.3325	-13.979	-51.1268	0	-92.1799	-19.0604	-45.245	-28.6539	0	-31.0713	-134.921	-91.7754	-10.8423	-114.398	0	-20.2107	0	-125.808	0	-11.6292	-17.8873	-27.9725	-129.455	-11.7224	-20.5813	-253.931	0	-29.5343	-16.3673	-54.3966	0	-42.1914	0	-10.7683	0	-34.5313	-11.654	-13.5682
sd2.1	bathing	bowing	buying	clapping	climbing	cooking	crawling	crying	dancing	digging	diving	dreaming	drinking	eating	fighting	giving	hugging	jumping	kissing	knitting	laughing	listening	painting	playing	reading	riding	sewing	singing	sitting	skiing	sleeping	smelling	snoring	standing	talking	thinking	waiting	washing	writing
变浅count	44.7161	16.5806	133.676	45.9904	65.2698	56.2289	50.2786	0	51.3818	39.9009	46.4797	28.8058	35.1998	234.718	114.785	75.4534	130.023	77.5784	10.1582	13.3754	487.511	131.97	147.768	54.7849	58.153	151.546	12.0531	104.59	45.5444	114.252	82.9034	42.7984	76.1266	101.459	71.8407	0	25.8699	60.2783	119.245
变深count	-70.1534	-287.468	-22.375	-128.916	-126.124	-128.444	-116.841	-360.548	-181.607	-314.834	-85.1091	-134.217	-120.628	-71.1207	-235.39	0	-48.7065	-154	-317.393	-86.8254	0	-40.0857	-47.5742	-97.5577	-222.281	-115.343	-285.915	-124.735	-212.259	-48.274	-138.417	-232.514	-207.029	-73.2558	-272.86	-167.266	-239.99	-354.819	-118.779
SDXL	bathing	bowing	buying	clapping	climbing	cooking	crawling	crying	dancing	digging	diving	dreaming	drinking	eating	fighting	giving	hugging	jumping	kissing	knitting	laughing	listening	painting	playing	reading	riding	sewing	singing	sitting	skiing	sleeping	smelling	snoring	standing	talking	thinking	waiting	washing	writing
变浅count	212.857	121.044	236.113	118.428	73.4025	198.036	183.164	219.771	223.159	111.778	180.251	268.04	128.075	291.788	108.432	117.121	140.307	165.195	122.537	116.333	112.364	119.731	178.764	185.789	224.21	141.337	302.739	206.106	167.05	128.639	208.999	161.706	224.925	193.471	177.104	214.419	176.652	292.816	92.4257
变深count	0	-56.3232	-60.8404	-82.2479	-60.6961	-13.8841	-80.3184	-88.6901	-56.3678	-152.217	-71.6309	-73.7524	-86.7801	-54.3202	-178.769	-59.0437	-24.3713	-43.482	-27.9684	-65.2578	-104.658	-94.4213	-89.9997	-100.224	-83.6037	-84.0483	-82.7193	-30.6411	-116.521	-88.5051	-59.2383	-98.2388	-58.9036	-98.801	-182.143	-117.765	-107.44	-19.7608	-124.035
midjourney	bathing	bowing	buying	clapping	climbing	cooking	crawling	crying	dancing	digging	diving	dreaming	drinking	eating	fighting	giving	hugging	jumping	kissing	knitting	laughing	listening	painting	playing	reading	riding	sewing	singing	sitting	skiing	sleeping	smelling	snoring	standing	talking	thinking	waiting	washing	writing
变浅count	38.3227	0	17.8283	45.4671	0	0	52.1796	0	31.1482	0	23.5938	17.8425	12.2257	28.5618	0	26.9891	0	12.2681	100.307	0	80.8126	80.9671	58.6373	21.6732	16.9154	0	0	16.8389	11.6704	0	27.2214	17.2488	12.0455	0	39.2082	17.2554	12.812	10.2452	10.2217
变深count	-293.678	-408.494	-256.303	-81.7495	-492.958	-507.614	-135.955	-315.311	-289.159	-398.297	-445.383	-231.381	-338.106	-334.129	-536.938	-292.081	-267.174	-542.171	-79.5169	-437.662	-129.954	-100.072	-148.911	-354.993	-405.837	-339.144	-415.293	-276.703	-330.685	-402.544	-281.516	-310.268	-186.511	-412.305	-190.806	-244.548	-273.58	-306.604	-470.757
