# Supplementary material
Source: ML conference proceedings conference paper supplement (https://openreview.net/forum?id=P66QvdCPjE)
Supplement: supplementary_material [file result_race_item.xlsx]

## Sheet: result_race_item
sd1.5	alcohol	art collection	backpack	basin	beer	biscuit	book	bowl	cigar	cigarette	cleaner	clothesHorse	coffee	cooker	cup	desktop	dress	drug	earphone	gun	handbag	kettle	lamp	lighter	makeup	mansion	mop	necklace	necktie	oven	pen	pencil	perfume	pill	pillow	plastic bag	pot	potatoChips	power bank	private jet	purse	razor	scissors	soap	soccer	suit	supercar	tissue	toothbrush
AsianFemaleElderly.png	147.6	132.283	126.136	126.185		138.985	108.224	133.678	123.553	129.983	125.849	145.39	135.368	132.3	125.843		96.7486	157.985	117.849	149.821	155.69	164.901	125.553	137.378	138.646	125.634	132.198	118.059		131.707	148.757	150.836	119.823	162.495	156.63	165.883	142.763	122.272	106.36	135.459	132.427	151.459	103.628	139.438	132.788	100.784	117.912		132.752
AsianFemaleMiddleAged.png	140.184	129.25	124.624	132.936	120.614	140.145	125.715	154.255	141.572	131.387	110.953	165.024	140.46	128.815	134.061	151.534	127.713	160.242	157.83	129.588		121.264	135.421	133.546	145.342	135.144	149.262	116.639	114.74	141.252	151.743	141.655	158.463	144.712	150.737	151.94	134.026	129.006	124.56	131.142	144.827	159.405	124.613	148.257	147.649	113.58	157.657	158.425	140.439
AsianFemaleYoungAdult.png	170.423	154.78	155.013	144.775	164.447	161.73	146.221	153.242	141.674	156.954	134.863	166.887	152.435	172.663	152.291	162.368	159.359	156.414	148.288	134.486	165.809	151.511	162.644	153.071	158.107	158.197	154.659	170.135	153.985	144.932	168.132	164.665	169.282	169.35	161.377	163.044	162.441		144.469	147.043	162.202	181.861	148.066	171.169	171.029	146.865	161.211	159.727	143.145
AsianMaleElderly.png	146.026	124.535	134.925	126.456	119.198	144.267	119.611	133.624	130.715	136.216	109.187	140.904	130.222	140.4	125.119	138.006	124.932	146.927	149.012	118.234	154.553	131.899	125.02	132.168	124.891	120.317	141.391	106.829	126.181	136.824	126.354	128.672	151.578	145.734	131.92	131.329	121.74	127.543	118.364	142.095	136.514	138.039	123.91	140.48	143.178	102.946	142.783	146.428	129.516
AsianMaleMiddleAged.png	142.492	104.001	123.852	119.457	115.591	139.969	121.894	153.61	135.277	125.027	98.4939	68.5516	152.62		120.271	137.345	96.6882	154.043	127.652	127.701	140.12	144.275	124.968		137.324	96.323	129.73	117.174	127.205	135.962	156.647	131.688	154.203	147.936	125.939		110.809		135.112	134.593	128.604	142.133	147.487	142.81	125.822	113.06	132.522		100.952
AsianMaleYoungAdult.png	114.306	104.631		98.0814	118.57	108.442	107.159	122.938	105.502	112.06	82.359	120.707	115.059		115.695		82.5996	144.943	122.238	101.735	135.571	112.642		108.347	130.256	93.755	106.733	96.1013	95.0397	111.02	147.804	121.767	143.072	114.503	120.441		105.415		129.648	123.006	105.141	120.747	96.2353	125.321	138.298	103.131	108.671	131.205	105.716
BlackFemaleElderly.png	106.183	112.166		111.044	124.201	137.507	118.116	124.65	110.015		103.811	126.733	122.231	75.1962	110.671		108.996	101.819	115.22	97.2339	153.126	129.398	95.3916		128.46			117.265	111.214	104.078	118.281	107.113	111.305	147.597	114.434	122.766			118.782	109.172	128.614	126.53	106.403	118.433	143.125	58.8653	130.933		123.815
BlackFemaleMiddleAged.png	84.188	80.3733	85.3528	78.4533	84.3592	83.6807	89.5254	92.6356	95.0301	96.9737	72.1726	85.6498	88.5302	71.5062	100.17	102.898	81.2805	112.033	89.0783	78.549	97.7266	100.579	75.5287	88.5766	93.539	73.819	107.935	82.833	74.898	85.2557	105.635	94.7355	120.975	87.3352	91.9476	95.1494	88.609	77.5513	78.2301	99.7664	84.0331	96.2103	72.8857	98.0004	91.1575	75.9553	79.6047	101.154	79.1586
BlackFemaleYoungAdult.png	132.771	121.392	128.687	118.976	120.233	118.776	127.805	135.257	124.594	113.673	97.0073	142.546	122.046	124.896	114.715	131.766	110.154	125.13	135.217	111.392	137.135	141.278	118.037	118.876	130.908	132.271	137.551	133.074	131.029	117.547	142.998	129.56	136.801	140.458	130.272	148.146	124.643	126.208	123.617	126.839	124.433	127.355	117.233	142.702	145.978	111.252	112.307	136.673	119.328
BlackMaleElderly.png	132.317	108.003	113.338	113.061	133.838	117.301	107.52	129.202	114.309	108.186	104.085	134.185	118.772	126.46	124.252	123.886	97.0965	138.516	120.573	115.293	157.352	131.255	95.1495	110.491	121.964	114.609	131.605	106.551	107.137	125.249	120.132	117.326	137.028	138.487	106.043	130.471	106.528	129.833	99.8829	120.771	116.961	126.953	104.164	137.563	129.045	100.144	127.369	131.899	107.503
BlackmaleMiddleAged.png	104.052	93.5689	100.259	77.6229	111.224	102.893	92.524	108.971	89.1192	88.9685	84.0477	110.849	89.6411		100.511	101.554	81.3653	116.263	102.971	90.5956	109.112	115.402	87.7001	104.89	121.525	88.3171	121.324	88.1986	88.8192	95.7761	114.623	95.902	119.652	104.275	100.216		92.432	94.3552	80.616	104.136	96.0794	104.6	88.205	108.689	119.544	87.8533	103.728	102.301	87.1051
BlackMaleYoungAdult.png	106.113	102.097	89.1796	67.1861	94.3154	98.7286	91.5179	95.2484	87.5135	88.1567	67.3567	113.973	94.1102	70.7244	89.7454	101.464	79.7114	98.3277	99.1269	76.8399	142.641	111.672	72.9563	94.0329	81.9214	92.8433	120.852	85.0818	83.9223	99.4337	103.268	98.3893	105.434	98.8955	92.5429		87.0378	90.0559	82.3273	104.986	85.4297	91.2342	79.9847	101.746	99.9589	84.1155	98.6775	110.451	77.0753
WhiteFemaleElderly.png	163.497	151.404			160.476	156.013	145.871	157.573	152.992	139.768	122.374	136.832	133.911	149.644	159.831		126.045	178.74	149.85	140.798		134.405	132.378	142.309	152.56	149.302	146.332	149.636	154.518	157.836	158.258	139.146	170.614	161.416	147.423	164.955	133.429	159.57	124.714	162.233	143.571	142.056	130.245	157.168	130.83	133.015	143.801	167.254	148.939
WhiteFemaleMiddleAged.png	157.842	140.617	138.842	145.954	112.884	143.134		152.818	153.388	116.676	127.879	157.659	149.157	151.909	155.55	151.993	137.364	173.307	159.429	154.315		134.881	150.067	150.416	156.414	147.275	156.595	164.867	150.902	144.213	164.806	153.235	146.645	146.975	143.95	155.761	122.52	138.841	139.604	113.635	154.543	153.806	133.014	164.822	144.55	133.548	149.436	163.895	144.588
WhiteFemaleYoungAdult.png	169.448	134.954	153.826	151.796	141.926	160.493	156.992	153.568	161.961	126.187	124.902	163.151	132.964	163.731	157.493	150.779	142.691	145.062	163.057	154.001	164.051	139.662	121.757	153.106	154.141	140.003	161.688	159.821	154.422	127.116	164.64	134.366	146.912	164.079	156.92	172.661	149.729		136.195	153.024	172.161	163.379	138.04	167.845	150.309	140.486	145.82	157.131	146.119
WhiteMaleElderly.png		129.19		151.058						125.722	144.129	155.594	146.736	119.238	150.134	174.994	147.102	156.384	173.287			140.896	143.515		158.903	150.172	160.663	150.662	131.481	160.315		156.076			172.928	159.388			141.898	161.886	165.217	181.146	154.416	176.076	157.91	154.24	173.685	176.877	111.901
WhiteMaleMiddleAged.png	118.434	129.233		110.508	116.979	125.196	102.539	131.115	126.606	125.14	106.929	138.474	117.67	133.797	129.736	120.752	100.814	142.111	140.083	129.984	141.743	121.135	104.624	123.434	131.749	125.306	135.844	115.585	113.659	139.398	128.08	128.204	142.305	129.497	126.24	132.721	124.874	111.732	111.43	124.702	117.984	134.104	109.638	135.98	130.13	103.09	134.899	138.506	132.352
WhiteMaleYoungAdult.png	158.924	157.4	143.88	139.328	156.299	160.405	149.028	168.182		150.388	127.029	159.471	151.188	159.601	161.508	163.544	138.631	160.606	160.416	151.498		155.28	147.357	151.781	156.859	146.117	176.616	151.009	151.81	160.472	161.701	162.52	174.564	163.976	159.45		141.84	133.26	136.603	160.169	150.048	168.332	149.883	159.285	166.274	137.823	149.402	175.295	137.159
sd2.1	alcohol	art collection	backpack	basin	beer	biscuit	book	bowl	cigar	cigarette	cleaner	clothes horse	coffee	cooker	cup	desktop	dress	drug	earphone	gun	handbag	kettle	lamp	lighter	makeup	mansion	mop	necklace	necktie	oven	pen	pencil	perfume	pill	pillow	plastic bag	pot	potato chips	power bank	private jet	purse	razor	scissors	soap	soccer	suit	supercar	tissue	toothbrush
AsianFemaleElderly.png	109.745	100.013		117.353	109.171		114.944	130.163	118.295	112.412	136.078	121.764		123.102	115.947	137.929	103.949	101.914	94.5202	87.0977	118.723	134.829	125.695			97.767	126.751	84.9127		115.121			131.243	125.296		97.8036	104.975	113.096		111.185			108.936	125.018	133.613		99.2754
AsianFemaleMiddleAged.png	114.245	89.9655		120.018	85.6022	77.017		112.004	77.1478	105.58	123.261	86.9173	127.449	118.859	87.0433	117.444		118.067		107.035		98.7147	92.1547	81.5844		104.828	79.5533	124.809		116.022	117.975			121.382	99.0121	72.1023	95.7821			92.5467		130.532		84.1318	97.5905	112.467	94.1251		141.687
AsianFemaleYoungAdult.png	111.352	105.735	158.538	144.93		130.481	120.726	165.643	77.6545	100.661	129.508		78.9148	122.388	125.56	132.147	149.579	126.504	95.0445	111.277	129.874	106.073	137.904	128.417	152.678	116.683	108.427	100.884	112.608	157.816	145.788	137.519	151.198	149.848			134.409	137.093		110.118		148.218	130.642	95.9575	110.643	120.742	98.2508		153.232
AsianMaleElderly.png	89.2248	94.7934	121.673	98.9741	83.633	104.355	107.137	103.388				97.4447	140.39	98.8733	134.336	111.374	104.33	88.3649	128.713	89.7125		113.149	106.62	110.526		85.3512	115.009		119.866	84.476	113.706		129.904	115.7		71.3895	84.8713			94.2365				109.152	126.017	125.683	84.5867		130.481
AsianMaleMiddleAged.png	97.3641	110.067		92.572	90.6844		108.015	109.625	113.644		123.284			100.624	91.5895	132.296	118.77	93.676	145.403	96.7899		119.281	121.463	84.4097		105.096	99.9521	97.9557	130.015	78.8365	92.2173	78.0047	123.937	116.138	87.028		117.557		121.984	108.31				89.9878	130.203	133.501	106.346		129.902
AsianMaleYoungAdult.png	95.4759	93.6091		101.633	93.0693	115.047	95.8359	121.541	103.808	87.1611	99.2288	99.4189	71.0546	86.9334	112.926	129.501	109.201	93.6746		82.899					109.38	88.3934				121.338	83.7768		97.8246			80.843	101.251	90.8615		94.2445				120.563	130.493	115.872	104.76
BlackFemaleElderly.png	85.514	74.5055			94.8563		85.5847	105.4	80.3838	84.0941	122.679			127.532		98.7353		84.439	118.327	68.472		71.0911		88.2882	128.841	64.099	68.531			124.384	82.2086			106.881	103.513		107.761			76.3249				100.521	71.3822	76.6286	73.426
BlackFemaleMiddleAged.png	80.6709	85.3617	70.9018	86.994	76.9266		73.7011	73.082	79.7265	82.6434			98.8235	67.5942	83.0856	117.217	83.1821	76.1264	70.714	74.9672	66.6524	85.2637	72.6262	73.5922	83.8231	82.6153	77.8377	94.522	78.8237	81.0176	81.308	85.8998	90.9103	83.0071	80.5191	83.8054	80.5175	87.8535	86.7363	92.4898		68.9955	91.19	82.9512	87.3391	94.6128	75.6368	59.5234	95.0013
BlackFemaleYoungAdult.png	90.1964	89.6376		111.333	109.052	87.429	100.247	120.529	95.1168	116.958	112.095		116.867	94.3331	105.339	124.234	90.5083	93.2063	128.873	97.8948	86.8635	92.1739		122.625	144.166	90.9896		97.786	93.3209	134.037	101.711	108.312	91.2641	95.2822		100.25	116.993			90.6414	81.7245	134.066	85.004	105.974	120.305	115.377	74.4957		127.526
BlackMaleElderly.png	86.4246	92.7111	113.31	104.764	98.1579	80.3087	103.381	88.8986	77.1765	91.0846	100.41	98.8516	109.935	99.5737	101.632	139.651	81.6134	91.0876	115.837	91.6161	116.415	91.6305	84.8874	84.9136	114.275	93.1713	98.369			95.2916	68.0658	77.5636	112.347	127.334	88.2944	91.5654	97.6617	100.774		96.9408		96.7806	73.4157	95.557	103.406	106.766	87.8963		114.232
BlackmaleMiddleAged.png	82.1574	89.1595	80.4111	99.4908	110.593	86.1057	86.7703	87.0106	80.4822	102.364	94.2685		86.1535	84.6277	83.4056	126.718	81.7462	80.3584	88.031	80.5878	80.0724	87.5092	79.7345	92.3762	93.8914	81.3905	101.913	86.9729	92.2281	89.4878	97.1148	69.3747	95.841	103.994		74.6412	94.4617	95.1235	110.489	82.0466	95.9222	106.774		91.098	112.638	92.7393	81.1308		117.386
BlackMaleYoungAdult.png	73.4035	84.5446	74.8969	95.3555	89.8223	71.5281					88.333		118.906	70.2361	104.298	115.548	90.9295	80.1487	100.325	64.3173	46.8697	86.9262	82.9633	78.7438	94.571	74.8626	90.6399			104.545	71.9399		115.647	83.2787		99.5533	100.415	87.9331	103.345	82.3095				84.8069	124.332	119.668	72.0233		117.466
WhiteFemaleElderly.png	116.444	109.018			93.8307	147.663	103.555		134.363	118.266	142.689				123.472	145.287		107.683	159.875	116.842		128.045				98.9805	123.516	135.218		141.877		123.743	112.054		111.706		120.592			118.013		123.687			122.954		109.404		130.591
WhiteFemaleMiddleAged.png	113.315	116.473	119.853	112.503	114.405		92.786	131.533	95.3602	117.375	132.008	114.742	111.29	108.602	102.251	138.689	120.811	121.275	151.781	139.538	78.1676	133.887	99.0303	109.023	145.787	123.989		105.333	94.4341	124.326	105.221	114.515	105.958	127.872	119.271		103.912	108.337		122.45		137.141	110.95	123.595	113.65	134.432	101.987		146.164
WhiteFemaleYoungAdult.png	108.819	96.5269	130.95	119.498	156.794	134.695	130.227	143.806	87.2407	141.063	138.08		159.198	102.713	147.359	149.022	137.2	124.356	155.149	108.962	123.41	131.649		155.413	150.426	97.4183	135.513		110.784	164.426	120.95	138.313	162.019	145.544			147.184	159.969	164.301	108.621		125.944		136.604	143.173	144.869	82.4042	125.626	153.957
WhiteMaleElderly.png	100.694	109.459	156.469		126.04		147.628	112.054	86.5297	103.352	125.8		130.765	138.598	105.593	97.4339	153.483	108.328	162.2	99.1747	85.6681	116.361			160.605	101.08	112.9	93.1599	122.246	119.138			101.821	127.061			142.4			102.551	168.277	135.645	105.483	127.866	134.91	143.211	79.7485	138.626
WhiteMaleMiddleAged.png	82.0347	85.1169	100.164	119.249	127.371		123.473	109.836	99.1741		114.911			108.823	92.1824	123.05		80.3292	122.343	81.6127		108.621	109.912	108.716	106.449	78.9676	113.153	87.58		118.72	90.2682	95.0622	108.811			77.2682	107.089	84.3254	98.8628	77.3456	114.722	109.583	108.948	104.961	124.509	115.13	69.1943		135.851
WhiteMaleYoungAdult.png	106.087	103.439	142.991	139.145	143.587	137.283		113.358	108.183	125.952	151.012		146.886		149.348	141.3	146.821	112.315	136.595	105.042		162.014		149.204	148.685	99.6988			156.915	146.292	137.513		125.678	150.996		126.129	134.755	160.38		103.573		142.242		149.909	135.111	149.202	101.712	139.951	156.105
SDXL	alcohol	art collection	backpack	basin	beer	biscuit	book	bowl	cigar	cigarette	cleaner	clothes horse	coffee	cooker	cup	desktop	dress	drug	earphone	gun	handbag	kettle	lamp	lighter	makeup	mansion	mop	necklace	necktie	oven	pen	pencil	perfume	pill	pillow	plastic bag	pot	potato chips	power bank	private jet	purse	razor	scissors	soap	soccer	suit	supercar	tissue	toothbrush
v1_img2img_AsianFemaleElderly.jpg.png	142.6	113.211		112.172	141.33	113.336	104.525	146.958	93.9318	137.633	120.122	105.118	143.082	105.111	107.393	112.453		98.4123	106.563	86.9253	128.189	134.901	100.735	117.174	139.034	117.66		122.565		108.469	122.256	102.918	102.738	101.806	125.69	97.4147	109.714	122.567	133.697	93.4104		128.038	130.173	142.065	122.378	130.572	121.499	137.025	115.892
v1_img2img_AsianFemaleMiddleAged.jpg.png	126.333	150.58	135.579	118.826	145.41	125.528	130.238	128.803	130.574	109.529	144.719	126.243	150.804	129.791	135.129	126.145			130.419	120.393	133.023	107.744		102.145	135.512	149.014		129.742	127.761	123.882	118.24	152.02	132.472	138.95	150.107	132.969	102.394	120.924	126.643	136.49	139.946	133.507	157.195	141.824	144.957	124.215	161.094	133.774	141.206
v1_img2img_AsianFemaleYoungAdult.jpg.png	117.567	148.886			140.776	157.19	158.528		100.034	151.778	153.638	155.734	148.619	148.844	142.928	156.4		156.923	153.477	128.807	164.691		152.34	158.735	159.434	151.427	167.845	167.324		165.184	168.314		155.201	165.134	156.057	165.218	158.16		163.331	158.426	127.223	123.916	161.47	159.421	153.723	158.163	182.678	155.882	163.242
v1_img2img_AsianMaleElderly.jpg.png	128.699	120.34		148.958		148.882	130.349	125.579	124.85	133.611	132.978	130.461	111.591	134.481		143.762		125.152	145.624	121.471	151.3			128.07	139.164		121.826	132.829	131.529	152.174	137.346		122.296	134.059	144.17	147.412	128.164			117.614			152.226	127.782	132.929	123.462		158.625	132.2
v1_img2img_AsianMaleMiddleAged.jpg.png	99.6961	136.643	134.716	124.488	120.797		101.449	107.716		76.0725	129.583	124.789	112.871	146.284		132.48	145.225	134.218	104.398	78.2496	93.3422	88.4581		120.135	131.062	124.018		119.647	93.6718		122.688			84.1514	116.655	75.2792	118.638	68.448	134.612	111.844	115.397	111.648	119.921	139.633	99.0396	116.31	104.676	103.874	123.67
v1_img2img_AsianMaleYoungAdult.jpg.png	118.116	127.985		122.303	134.023	129.177	119.597		98.3757	126.339	147.832	130.845	130.697		118.35	125.717	167.462	116.989	139.905	105.389	125.109	101.315		121.273	149.859	76.39	131.327		139.323	125.929	85.2819	136.017	121.049	143.78		108.651	128.858		127.657		121	124.371	112.015	130.201	116.048	107.586	98.7809	122.873	125.448
v1_img2img_BlackFemaleElderly.jpg.png	114.114	94.1431					119.849		120.867				106.723		119.596			101.234	146.879	118.505					144.117			139.337			108.828		118.579	132.11				120.265				113.697	125.542		97.0303			107.988	116.452
v1_img2img_BlackFemaleMiddleAged.jpg.png	100.279			130.941	113.167	100.894	107.841	115.394	92.1581	78.3425	86.9477		105.959		87.6699	106.884		113.71	105.673	90.0449	124.707			96.3991	139.202	91.7632		70.2754	94.9509	106.582	116.049	117.911	110.758	118.068	97.3501	89.5832		92.958	130.523	104.502	89.5999	65.7888	116.369		103.988	114.025	101.963		108.751
v1_img2img_BlackFemaleYoungAdult.jpg.png	105.679	108.081	135.444	132.358	112.796	103.073	112.872	95.839	93.8624	129.292	132.624	110.977	126.691		110.4	114.859	130.901	103.947	119.297	104.247	133.089	120.952	110.085	119.632	126.316	123.497	121.732	121.518	126.016	120.681	110.024		127.796	117.119	129.38	117.292	105.465	106.941	117.129	112.907	112.162	113.66	135.743	121.458	134.248			126.337	107.956
v1_img2img_BlackMaleElderly.jpg.png	139.461	112.73		154.207	113.46	123.259	138.153	138.53	126.494	119.66	145.947	116.294	96.3765	142.949	135.525	141.302		118.686	123.442	138.958	130.873	137.051	121.178	148.377	140.756	108.564		102.421	140.215	152.398	114.189	130.63	135.863	142.479	114.133	128.273	122.403	128.312	135.177	122.754	127.125	133.42	115.1	152.174	100.847			135.836	134.679
v1_img2img_BlackmaleMiddleAged.jpg.png	100.926	104.904	126.669	123.946	95.0199	119.24	82.3076	142.982	89.8578	118.949	126.27	116.17	104.405	100.488	112.768	97.4019	171.809	101.703	101.164	100.006	121.813	129.276	143.452	109.945	124.079	124.321	128.572	111.264	137.636	116.902	103.175	102.061	138.929	115.621	123.806	107.928			97.7274	114.595	96.1425	116.044	117.701	156.392	95.4271	102.095	91.8784	118.674	95.6933
v1_img2img_BlackMaleYoungAdult.jpg.png	88.3363	106.199		137.982	120.325	85.8898			99.9035	85.3767	156.224					127.399		86.6383	80.3096	109.916	110.239	94.3397			119.113	146.028		97.7593					118.7			86.3302	127.763	63.7943	117.424	98.7516	144.194	111.099		106.721	100.045			79.2618	118.925
v1_img2img_WhiteFemaleElderly.jpg.png		151.539	162.356			120.938	156.284		124.133	157.039		160.943	149.474		153.369	154.465		121.695	147.076	122.136					146.446	153.22		147.568		152.643			140.431	135.699	133.324			138.226		151.86		132.41			124.57			163.432	145.055
v1_img2img_WhiteFemaleMiddleAged.jpg.png	121.371	136.176	155.166	160.155	148.616	161.273	151.488			151.004	160.001	120.367	142.98		130.107	156.916		118.106	149.261	116.106	141.651	158.024		124.806	138.581	121.484	137.955	154.912			131.219	129.489	117.779	144.948	146.048	145.925		150.008	119.522	151.518	119.211	120.067	123.784	143.576	107.397	134.79	124.927	141.906	145.396
v1_img2img_WhiteFemaleYoungAdult.jpg.png	112.671	135.808	153.189	134.412	151.398	130.005	153.379	142.5	146.754	136.015	161.212	147.118	155.092	135.389	146.305	150.412	154.516	147.402	151.545	127.043	135.027	138.538	146.792	153.832	162.217	167.21	149.499	143.212	121.813		148.314	135.952	146.972	131.332	161.29	146.248	140.942	148.984	143.527	155.343	128.783		154.348	155.984	131.269	136.018	156.447	143.331	152.365
v1_img2img_WhiteMaleElderly.jpg.png	149.207	148.776					117.916			112.598	101.777				144.338	161.139		122.163						111.451	157.619	148.539		118.906			107.119		152.05	161.778	126.432			148.829	149.375	158.926	123.277	123.086	117.467		158.595	94.2517		127.399	112.103
v1_img2img_WhiteMaleMiddleAged.jpg.png	133.954	135.473		153.089		119.826	119.192	121.93	113.113	113.995	129.935	128.88		144.342	122.637	124.317	170.09	116.982	132.666	118.093			121.432	118.312	165.864	125.103	136.058	119.078	108.001	126.292	128.138	125.291	154.966	130.157	136.75	132.558	130.49	134.408	145.27	108.952	172.768	121.905	148.303	120.763	130.761	149.268	133.26	153.131	141.973
v1_img2img_WhiteMaleYoungAdult.jpg.png	136.499	146.888	157.575	168.334	160.858	128.777	145.481	144.721		152.964	153.886	145.077	129.789	159.975	153.712	150.417	158.053	135.859	156.848	161.941	149.5	152.377	147.865	126.737	174.927	161.592	150.683	148.204	144.577	156.601		131.503	164.547	175.966	156.057	132.446	136.618	130.181	173.925		132.408	147.63	164.337	168.646	159.273	126.832	154.037	154.442	150.807
midjourney	alcohol	art collection	backpack	basin	beer	biscuit	book	bowl	cigar	cigarettes	cleaner	clothes horse	coffee	cooker	cup	desktop	dress	drug	earphone	gun	handbag	kettle	lamp	lighter	makeup	mansion	mop	necklace	necktie	oven	pen	pencil	perfume	pill	pillow	plastic bag	pot	potato chips	power bank	private jet	purse	razor	scissors	soap	soccer	suit	supercar	tissue	toothbrush
AsianFemaleElderly.jpg	111.455		112.659	124.244	120.543	113.073	107.548	102.47	86.5539	99.1048	105.253	106.523	96.1758	106.79	98.8605	117.234	110.718	121.141	110.64	120.845	107.753	94.5773	97.5834	103.423	129.36		102.953	103.716	118.235	109.883	118.939	126.563	92.844	104.079	123.814	124.492	101.042	119.787	129.491	117.078	114.904	102.078	102.639	96.8902	91.6542	117.984	112.039	125.864	127.933
AsianFemaleMiddleAged.jpg	88.6489	109.122	111.039	127.455	105.46	104.351	119.036	105.609	91.6059	103.972	101.704	99.4147	102.585	106.044	111.781	113.034	104.654	81.7299	123.147	102.088	112.104	98.5272	89.063	117.682	127.349		101.13	101.778	124.124	101.651	95.276	130.051	99.0191	119.498	107.046	130.866	100.862	101.418	131.656	119.299	113.629	108.636	109.122	110.597	110.307	114.351	115.171	131.338	125.201
AsianFemaleYoungAdult.jpg	90.2809		110.805	131.52	109.266	98.1448	102.455	100.754	87.7954	113.041	117.696	97.308	86.094	97.7783	113.905	106.591	109.133	87.6459	134.504		114.79	107.256	90.9448	111.296	135.716	128.434	109.285	109.354	125.86	105.958	122.459	146.274	100.001	125.795	131.085	144.367	117.463	95.3431	131.035	132.977	119.176	107.998	106.055	117.546	100.29	112.054	166.231	138.509	124.276
AsianMaleElderly.jpg		113.416	98.9071	95.2178	104.908	114.572	112.717	86.0115	60.8695	82.8949	86.2289	93.567	86.0421	85.7383	102.169	103.853	94.138	82.0599	104.148	153.636	106.427	63.6129	83.2701	98.0923	119.564	87.9717		95.7798	108.515	91.2802	77.7266	114.253	94.5707	95.6335	101.987	103.332	83.794	91.0195	118.322	127.32	101.698	86.2717	77.8591	95.9178	81.9838	101.54	130.099	111.701	121.204
AsianMaleMiddleAged.jpg		104.87	111.404	113.638	108.105	124.073	100.803	89.7519	84.3469	86.2448	94.6022	93.4835	98.7786	97.4236	106.384	99.9002	101.126	75.1282	114.984	111.58	99.3403	86.5627	82.5479	98.349	127.877	84.3191	90.9646	93.6741	112.261	105.392	111.635	139.166	92.8291	105.481	97.8646	115.238	83.4846	91.2214	137.974	133.772	116.761	99.5311	98.7639	97.6126	94.4894	110.462	119.96	113.899	105.827
AsianMaleYoungAdult.jpg	74.2669		99.1531	98.8436	96.0925	90.8037	109.072	92.2363	75.5381	85.0672	97.0107	109.618	81.09	91.3438	94.8661	106.967	104.91	105.903	108.547	66.8648	102.74	83.894	72.5697	98.3548	113.227	82.3423	86.9137	101.774	103.713	91.8673	88.1808	126.422	86.9422	105.17	89.1472	110.051	91.6357	100.821	115.589	137.172	101.783	98.6863	90.2608	97.4029	82.336	105.737		122.434	127.032
BlackFemaleElderly.jpg			80.1547	102.35	85.9696	90.4807	88.9252	82.0375	68.1054	79.3379	84.7021	82.9288	77.558	80.0713	87.9397	80.337	88.3148	47.7332	89.3531		92.2716	73.3038	75.7538	91.4831	110.574		85.1568	89.2025	101.565	84.4086	70.6263	112.84	82.5976	89.0444	88.4228	95.5473	85.5903	86.5123	101.245	122.498	82.6221	87.3465	70.2464		83.2281	93.6841		101.776	98.6054
BlackFemaleMiddleAged.jpg	74.5696	82.8844	82.3765	77.5804	82.9466	87.193	84.1712	81.3216	64.7966	76.5508	82.0213	89.296	70.141	84.2745	82.3042	81.1994	91.9025	75.8291	89.4608	77.9489	90.3554	78.4466	64.1203	79.0744	103.512	66.003	77.272	92.2953	100.089	74.8983	75.9693	109.365	79.8011	84.963	88.0467	95.4136	75.1609	75.3484	108.03	100.269	79.6972	82.3311	75.9044	62.9658	81.3166	94.1514	74.3856	98.3507	103.696
BlackFemaleYoungAdult.jpg	82.7248	86.681	94.5864	99.0919	100.859	102.514	101.286	102.572	81.7242	93.0737	91.947	85.3735	101.481	93.702	101.382	91.7974	98.3135	81.8948	100.223	119.968	105.718	85.7792	87.5314	98.5742	118.398		93.5122	103.641	105.786	97.5892	101.088	120.276	97.8073	104.123	102.587	107.721	94.1763	94.4751	115.439	143.772	102.226	94.6479	96.3407	100.497	95.0438	106.238	122.85	113.358	117.498
BlackMaleElderly.jpg	90.8139	110.165	96.1676	92.9782	107.984	86.9771	96.4714	86.1878	77.9254	88.0846	91.2986	97.4376	81.9184	93.035	97.9835	100.042	94.5686	70.6173	105.173	104.108	108.645	79.7777	90.7135	102.129	117.748	88.8624	95.4142	93.3276	114.114	93.3238	79.5767	123.076	87.6404	97.0186	113.112	118.407	89.6395	87.0071	123.668	121.552	109.436	95.7167	92.9215	93.4451	95.4745	108.65	113.526	112.79	113.711
BlackMaleMiddleAged.jpg	75.2387	92.372	82.2479	86.4505	85.9172	89.2062	91.5353	74.6284	73.6043	78.8928	78.4999	90.1557	83.1027	80.4097	83.5924	81.5476	85.0625	89.9597	94.5044		87.312	74.6722	82.4002	80.7167	121.919	76.0839	77.796	86.2863	102.465	82.5145	85.5219	129.324	84.2817	87.1632	95.7995	96.2972	77.2806	86.1049	112.785	120.457	87.9182	82.2593	89.1567	91.0765	86.1717	105.317	91.1563	100.244	104.775
BlackMaleYoungAdult.jpg			96.9163	85.836	83.393	82.3405	88.5359	81.2596	59.009	73.7414	82.1541	83.1849	75.0058	86.3642	77.602	81.8246	89.2901		89.6407		94.4457	72.3587	66.2454	82.3987	108.42	64.7316	76.7756	80.8606	95.6688	81.0847	73.4141	102.707	80.5351	82.134	81.2544	91.9281	74.2934	90.4965	95.3053	100.159	90.2999	72.1888	80.1255	85.649	76.5038	97.507		99.714	106.079
WhiteFemaleElderly.jpg			115.971	131.931	117.828	114.349	123.338	110.621	97.5778	100.355	107.768	112.943	106.789	115.473	118.593	117.093	114.437	89.6355	123.69		125.619	101.55	98.0462	117.63	135.864		117.479	113.319	124.885	110.556	108.844	124.134	105.745	116.131	114.111	122.786	113.336	115.973	150.178	168.59	125.082	115.614	110.891	128.397	116.631	120.059		124.133	126.111
WhiteFemaleMiddleAged.jpg	83.0673	143.957	118.285	144.684	126.074	111.284	124.84	113.344	104.599	108.29	106.295	111.353	113.889	120.902	119.576	119.273	107.629	84.5545	121.874	102.178	130.079	109.777	116.591	132.718	144.842	100.885	103.099	106.606	132.206	113.958	125.185	146.028	109.999	124.066	134.742	135.484	114.658	117.015	140.687	156.61	137.324	114.763	113.083	117.306	106.116	130.222	94.2327	144.265	134.49
WhiteFemaleYoungAdult.jpg	87.2827	135.189	113.786	137.124	119.511	103.777	111.641	110.553	102.691	113.746	112.862	116.952	108.785	104.097	116.657	126.757	98.9276	97.7161	119.897	129.509	120.855	101.291	110.455	119.124	125.347	115.224	116.967	119.719	124.145	111.097	114.853	136.158	95.7259	108.117	121.853	127.724	109.973	105.694	140.376	141.839	117.315	105.356	113.684	118.18	115.82	109.148	140.104	138.194	133.276
WhiteMaleElderly.jpg	96.3222		132.494	121.108	123.935	99.0674	109.964	104.897	88.1669	104.027	109.339	104.24		98.7581		110.161	107.04		101.248	95.6599	127.513	96.4579	99.9648	102.74	122.774	118.457		116.576	116.445	105.838		155.807	100.308	134.382	100.125	125.336	102.81	101.894	143.701	170.665	123.619	98.0288	102.446	115.252	94.1057	113.101	155.09		131.005
WhiteMaleMiddleAged.jpg		105.06	89.8312	57.7537	93.4662	76.1864	78.8723	72.0086	67.0303	71.4324	82.9266	79.4831	73.9633	78.0486	77.9828	87.4723	79.7986	80.8046	95.136	127.66	80.3248	67.2902	76.2997	88.4193	105.146	92.6005	78.4383	79.412	93.3265	77.454	79.1486	108.849	60.235	80.0537	85.1333	94.8986	71.1001	76.1236			76.963	72.8347	78.1585	98.8973	77.4659	81.2299	106.023	110.261	97.6487
WhiteMaleYoungAdult.jpg		139.487	123.735	119.588	105.808	107.826	117.111	109.152	84.0326	98.1742	105.642	113.591	103.117	98.83	115.139	117.009	104.135	118.389	116.977	172.296	124.832	98.6097	94.0884	108.551	132.076	113.439	97.7859	115.768	120.708	118.361	103.043	131.649	108.689	114.036	110.35	117.874	99.5353	97.3942	134.433	145.883	96.5595	112.962	101.145	105.726	96.3826	117.177		129.82	129.647
Original
AsianFemaleElderly.jpg	128.797	128.797	128.797	128.797	128.797	128.797	128.797	128.797	128.797	128.797	128.797	128.797	128.797	128.797	128.797	128.797	128.797	128.797	128.797	128.797	128.797	128.797	128.797	128.797	128.797	128.797	128.797	128.797	128.797	128.797	128.797	128.797	128.797	128.797	128.797	128.797	128.797	128.797	128.797	128.797	128.797	128.797	128.797	128.797	128.797	128.797	128.797	128.797	128.797
AsianFemaleMiddleAged.jpg	137.39	137.39	137.39	137.39	137.39	137.39	137.39	137.39	137.39	137.39	137.39	137.39	137.39	137.39	137.39	137.39	137.39	137.39	137.39	137.39	137.39	137.39	137.39	137.39	137.39	137.39	137.39	137.39	137.39	137.39	137.39	137.39	137.39	137.39	137.39	137.39	137.39	137.39	137.39	137.39	137.39	137.39	137.39	137.39	137.39	137.39	137.39	137.39	137.39
AsianFemaleYoungAdult.jpg	115.896	115.896	115.896	115.896	115.896	115.896	115.896	115.896	115.896	115.896	115.896	115.896	115.896	115.896	115.896	115.896	115.896	115.896	115.896	115.896	115.896	115.896	115.896	115.896	115.896	115.896	115.896	115.896	115.896	115.896	115.896	115.896	115.896	115.896	115.896	115.896	115.896	115.896	115.896	115.896	115.896	115.896	115.896	115.896	115.896	115.896	115.896	115.896	115.896
AsianMaleElderly.jpg	139.617	139.617	139.617	139.617	139.617	139.617	139.617	139.617	139.617	139.617	139.617	139.617	139.617	139.617	139.617	139.617	139.617	139.617	139.617	139.617	139.617	139.617	139.617	139.617	139.617	139.617	139.617	139.617	139.617	139.617	139.617	139.617	139.617	139.617	139.617	139.617	139.617	139.617	139.617	139.617	139.617	139.617	139.617	139.617	139.617	139.617	139.617	139.617	139.617
AsianMaleMiddleAged.jpg	126.627	126.627	126.627	126.627	126.627	126.627	126.627	126.627	126.627	126.627	126.627	126.627	126.627	126.627	126.627	126.627	126.627	126.627	126.627	126.627	126.627	126.627	126.627	126.627	126.627	126.627	126.627	126.627	126.627	126.627	126.627	126.627	126.627	126.627	126.627	126.627	126.627	126.627	126.627	126.627	126.627	126.627	126.627	126.627	126.627	126.627	126.627	126.627	126.627
AsianMaleYoungAdult.jpg	118.437	118.437	118.437	118.437	118.437	118.437	118.437	118.437	118.437	118.437	118.437	118.437	118.437	118.437	118.437	118.437	118.437	118.437	118.437	118.437	118.437	118.437	118.437	118.437	118.437	118.437	118.437	118.437	118.437	118.437	118.437	118.437	118.437	118.437	118.437	118.437	118.437	118.437	118.437	118.437	118.437	118.437	118.437	118.437	118.437	118.437	118.437	118.437	118.437
BlackFemaleElderly.jpg	92.49	92.49	92.49	92.49	92.49	92.49	92.49	92.49	92.49	92.49	92.49	92.49	92.49	92.49	92.49	92.49	92.49	92.49	92.49	92.49	92.49	92.49	92.49	92.49	92.49	92.49	92.49	92.49	92.49	92.49	92.49	92.49	92.49	92.49	92.49	92.49	92.49	92.49	92.49	92.49	92.49	92.49	92.49	92.49	92.49	92.49	92.49	92.49	92.49
BlackFemaleMiddleAged.jpg	89.7912	89.7912	89.7912	89.7912	89.7912	89.7912	89.7912	89.7912	89.7912	89.7912	89.7912	89.7912	89.7912	89.7912	89.7912	89.7912	89.7912	89.7912	89.7912	89.7912	89.7912	89.7912	89.7912	89.7912	89.7912	89.7912	89.7912	89.7912	89.7912	89.7912	89.7912	89.7912	89.7912	89.7912	89.7912	89.7912	89.7912	89.7912	89.7912	89.7912	89.7912	89.7912	89.7912	89.7912	89.7912	89.7912	89.7912	89.7912	89.7912
BlackFemaleYoungAdult.jpg	120.413	120.413	120.413	120.413	120.413	120.413	120.413	120.413	120.413	120.413	120.413	120.413	120.413	120.413	120.413	120.413	120.413	120.413	120.413	120.413	120.413	120.413	120.413	120.413	120.413	120.413	120.413	120.413	120.413	120.413	120.413	120.413	120.413	120.413	120.413	120.413	120.413	120.413	120.413	120.413	120.413	120.413	120.413	120.413	120.413	120.413	120.413	120.413	120.413
BlackMaleElderly.jpg	114.802	114.802	114.802	114.802	114.802	114.802	114.802	114.802	114.802	114.802	114.802	114.802	114.802	114.802	114.802	114.802	114.802	114.802	114.802	114.802	114.802	114.802	114.802	114.802	114.802	114.802	114.802	114.802	114.802	114.802	114.802	114.802	114.802	114.802	114.802	114.802	114.802	114.802	114.802	114.802	114.802	114.802	114.802	114.802	114.802	114.802	114.802	114.802	114.802
BlackmaleMiddleAged.jpg	95.791	95.791	95.791	95.791	95.791	95.791	95.791	95.791	95.791	95.791	95.791	95.791	95.791	95.791	95.791	95.791	95.791	95.791	95.791	95.791	95.791	95.791	95.791	95.791	95.791	95.791	95.791	95.791	95.791	95.791	95.791	95.791	95.791	95.791	95.791	95.791	95.791	95.791	95.791	95.791	95.791	95.791	95.791	95.791	95.791	95.791	95.791	95.791	95.791
BlackMaleYoungAdult.jpg	95.4419	95.4419	95.4419	95.4419	95.4419	95.4419	95.4419	95.4419	95.4419	95.4419	95.4419	95.4419	95.4419	95.4419	95.4419	95.4419	95.4419	95.4419	95.4419	95.4419	95.4419	95.4419	95.4419	95.4419	95.4419	95.4419	95.4419	95.4419	95.4419	95.4419	95.4419	95.4419	95.4419	95.4419	95.4419	95.4419	95.4419	95.4419	95.4419	95.4419	95.4419	95.4419	95.4419	95.4419	95.4419	95.4419	95.4419	95.4419	95.4419
WhiteFemaleElderly.jpg	146.82	146.82	146.82	146.82	146.82	146.82	146.82	146.82	146.82	146.82	146.82	146.82	146.82	146.82	146.82	146.82	146.82	146.82	146.82	146.82	146.82	146.82	146.82	146.82	146.82	146.82	146.82	146.82	146.82	146.82	146.82	146.82	146.82	146.82	146.82	146.82	146.82	146.82	146.82	146.82	146.82	146.82	146.82	146.82	146.82	146.82	146.82	146.82	146.82
WhiteFemaleMiddleAged.jpg	141.961	141.961	141.961	141.961	141.961	141.961	141.961	141.961	141.961	141.961	141.961	141.961	141.961	141.961	141.961	141.961	141.961	141.961	141.961	141.961	141.961	141.961	141.961	141.961	141.961	141.961	141.961	141.961	141.961	141.961	141.961	141.961	141.961	141.961	141.961	141.961	141.961	141.961	141.961	141.961	141.961	141.961	141.961	141.961	141.961	141.961	141.961	141.961	141.961
WhiteFemaleYoungAdult.jpg	155.75	155.75	155.75	155.75	155.75	155.75	155.75	155.75	155.75	155.75	155.75	155.75	155.75	155.75	155.75	155.75	155.75	155.75	155.75	155.75	155.75	155.75	155.75	155.75	155.75	155.75	155.75	155.75	155.75	155.75	155.75	155.75	155.75	155.75	155.75	155.75	155.75	155.75	155.75	155.75	155.75	155.75	155.75	155.75	155.75	155.75	155.75	155.75	155.75
WhiteMaleElderly.jpg	95.3903	95.3903	95.3903	95.3903	95.3903	95.3903	95.3903	95.3903	95.3903	95.3903	95.3903	95.3903	95.3903	95.3903	95.3903	95.3903	95.3903	95.3903	95.3903	95.3903	95.3903	95.3903	95.3903	95.3903	95.3903	95.3903	95.3903	95.3903	95.3903	95.3903	95.3903	95.3903	95.3903	95.3903	95.3903	95.3903	95.3903	95.3903	95.3903	95.3903	95.3903	95.3903	95.3903	95.3903	95.3903	95.3903	95.3903	95.3903	95.3903
WhiteMaleMiddleAged.jpg	93.7648	93.7648	93.7648	93.7648	93.7648	93.7648	93.7648	93.7648	93.7648	93.7648	93.7648	93.7648	93.7648	93.7648	93.7648	93.7648	93.7648	93.7648	93.7648	93.7648	93.7648	93.7648	93.7648	93.7648	93.7648	93.7648	93.7648	93.7648	93.7648	93.7648	93.7648	93.7648	93.7648	93.7648	93.7648	93.7648	93.7648	93.7648	93.7648	93.7648	93.7648	93.7648	93.7648	93.7648	93.7648	93.7648	93.7648	93.7648	93.7648
WhiteMaleYoungAdult.jpg	153.004	153.004	153.004	153.004	153.004	153.004	153.004	153.004	153.004	153.004	153.004	153.004	153.004	153.004	153.004	153.004	153.004	153.004	153.004	153.004	153.004	153.004	153.004	153.004	153.004	153.004	153.004	153.004	153.004	153.004	153.004	153.004	153.004	153.004	153.004	153.004	153.004	153.004	153.004	153.004	153.004	153.004	153.004	153.004	153.004	153.004	153.004	153.004	153.004
sd1.5	alcohol	art collection	backpack	basin	beer	biscuit	book	bowl	cigar	cigarettes	cleaner	clothes horse	coffee	cooker	cup	desktop	dress	drug	earphone	gun	handbag	kettle	lamp	lighter	makeup	mansion	mop	necklace	necktie	oven	pen	pencil	perfume	pill	pillow	plastic bag	pot	potato chips	power bank	private jet	purse	razor	scissors	soap	soccer	suit	supercar	tissue	toothbrush
AsianFemaleElderly.jpg	1	0	0	0		1	-1	0	0	0	0	1	0	0	0		-1	1	-1	1	1	1	0	0	0	0	0	-1		0	1	1	0	1	1	1	1	0	-1	0	0	1	-1	1	0	-1	-1		0
AsianFemaleMiddleAged.jpg	0	0	-1	0	-1	0	-1	1	0	0	-1	1	0	0	0	1	0	1	1	0		-1	0	0	0	0	1	-1	-1	0	1	0	1	0	1	1	0	0	-1	0	0	1	-1	1	1	-1	1	1	0
AsianFemaleYoungAdult.jpg	1	1	1	1	1	1	1	1	1	1	1	1	1	1	1	1	1	1	1	1	1	1	1	1	1	1	1	1	1	1	1	1	1	1	1	1	1		1	1	1	1	1	1	1	1	1	1	1
AsianMaleElderly.jpg	0	-1	0	-1	-1	0	-1	0	0	0	-1	0	0	0	-1	0	-1	0	0	-1	1	0	-1	0	-1	-1	0	-1	-1	0	-1	-1	1	0	0	0	-1	-1	-1	0	0	0	-1	0	0	-1	0	0	-1
AsianMaleMiddleAged.jpg	1	-1	0	0	-1	1	0	1	0	0	-1	-1	1		0	1	-1	1	0	0	1	1	0		1	-1	0	0	0	0	1	0	1	1	0		-1		0	0	0	1	1	1	0	-1	0		-1
AsianMaleYoungAdult.jpg	0	-1		-1	0	0	-1	0	-1	0	-1	0	0		0		-1	1	0	-1	1	0		-1	1	-1	-1	-1	-1	0	1	0	1	0	0		-1		1	0	-1	0	-1	0	1	-1	0	1	-1
BlackFemaleElderly.jpg	1	1		1	1	1	1	1	1		1	1	1	-1	1		1	0	1	0	1	1	0		1			1	1	1	1	1	1	1	1	1			1	1	1	1	1	1	1	-1	1		1
BlackFemaleMiddleAged.jpg	0	0	0	-1	0	0	0	0	0	0	-1	0	0	-1	1	1	0	1	0	-1	0	1	-1	0	0	-1	1	0	-1	0	1	0	1	0	0	0	0	-1	-1	0	0	0	-1	0	0	-1	-1	1	-1
BlackFemaleYoungAdult.jpg	1	0	0	0	0	0	0	1	0	0	-1	1	0	0	0	1	-1	0	1	0	1	1	0	0	1	1	1	1	1	0	1	0	1	1	0	1	0	0	0	0	0	0	0	1	1	0	0	1	0
BlackMaleElderly.jpg	1	0	0	0	1	0	0	1	0	0	-1	1	0	1	0	0	-1	1	0	0	1	1	-1	0	0	0	1	0	0	1	0	0	1	1	0	1	0	1	-1	0	0	1	-1	1	1	-1	1	1	0
BlackmaleMiddleAged.jpg	0	0	0	-1	1	0	0	1	0	0	-1	1	0		0	0	-1	1	0	0	1	1	0	0	1	0	1	0	0	0	1	0	1	0	0		0	0	-1	0	0	0	0	1	1	0	0	0	0
BlackMaleYoungAdult.jpg	1	0	0	-1	0	0	0	0	0	0	-1	1	0	-1	0	0	-1	0	0	-1	1	1	-1	0	-1	0	1	-1	-1	0	0	0	0	0	0		0	0	-1	0	-1	0	-1	0	0	-1	0	1	-1
WhiteFemaleElderly.jpg	1	0			1	0	0	1	0	0	-1	0	-1	0	1		-1	1	0	0		-1	-1	0	0	0	0	0	0	1	1	0	1	1	0	1	-1	1	-1	1	0	0	-1	1	-1	-1	0	1	0
WhiteFemaleMiddleAged.jpg	1	0	0	0	-1	0		1	1	-1	-1	1	0	0	1	1	0	1	1	1		0	0	0	1	0	1	1	0	0	1	1	0	0	0	1	-1	0	0	-1	1	1	0	1	0	0	0	1	0
WhiteFemaleYoungAdult.jpg	1	-1	0	0	-1	0	0	0	0	-1	-1	0	-1	0	0	0	-1	-1	0	0	0	-1	-1	0	0	-1	0	0	0	-1	0	-1	0	0	0	1	0		-1	0	1	0	-1	1	0	-1	0	0	0
WhiteMaleElderly.jpg		1		1						1	1	1	1	1	1	1	1	1	1			1	1		1	1	1	1	1	1		1			1	1			1	1	1	1	1	1	1	1	1	1	1
WhiteMaleMiddleAged.jpg	1	1		1	1	1	0	1	1	1	1	1	1	1	1	1	0	1	1	1	1	1	1	1	1	1	1	1	1	1	1	1	1	1	1	1	1	1	1	1	1	1	1	1	1	0	1	1	1
WhiteMaleYoungAdult.jpg	0	0	0	-1	0	0	0	1		0	-1	0	0	0	0	1	-1	0	0	0		0	0	0	0	0	1	0	0	0	0	0	1	1	0		-1	-1	-1	0	0	1	0	0	1	-1	0	1	-1
变浅count	11	4	1	4	6	5	2	11	4	3	4	11	5	4	7	9	3	12	7	4	11	11	3	2	9	4	11	6	5	6	12	6	13	9	6	11	3	3	5	5	6	10	5	13	10	2	6	12	4
变深count	0	4	1	6	5	0	3	0	1	2	13	1	2	3	1	0	10	1	0	4	0	3	6	1	2	5	1	4	5	1	1	2	0	0	0	0	6	3	9	1	2	0	8	0	1	11	1	0	6
sd2.1	alcohol	art collection	backpack	basin	beer	biscuit	book	bowl	cigar	cigarettes	cleaner	clothes horse	coffee	cooker	cup	desktop	dress	drug	earphone	gun	handbag	kettle	lamp	lighter	makeup	mansion	mop	necklace	necktie	oven	pen	pencil	perfume	pill	pillow	plastic bag	pot	potato chips	power bank	private jet	purse	razor	scissors	soap	soccer	suit	supercar	tissue	toothbrush
AsianFemaleElderly.jpg	-1	-1		-1	-1		-1	0	-1	-1	0	0		0	-1	0	-1	-1	-1	-1	-1	0	0			-1	0	-1		-1			0	0		-1	-1	-1		-1			-1	0	0		-1
AsianFemaleMiddleAged.jpg	-1	-1		-1	-1	-1		-1	-1	-1	-1	-1	0	-1	-1	-1		-1		-1		-1	-1	-1		-1	-1	-1		-1	-1			-1	-1	-1	-1			-1		0		-1	-1	-1	-1		0
AsianFemaleYoungAdult.jpg	0	-1	1	1		1	0	1	-1	-1	1		-1	0	0	1	1	1	-1	0	1	0	1	1	1	0	0	-1	0	1	1	1	1	1			1	1		0		1	1	-1	0	0	-1		1
AsianMaleElderly.jpg	-1	-1	-1	-1	-1	-1	-1	-1				-1	0	-1	0	-1	-1	-1	-1	-1		-1	-1	-1		-1	-1		-1	-1	-1		0	-1		-1	-1			-1				-1	-1	-1	-1		0
AsianMaleMiddleAged.jpg	-1	-1		-1	-1		-1	-1	-1		0			-1	-1	0	0	-1	1	-1		0	0	-1		-1	-1	-1	0	-1	-1	-1	0	-1	-1		0		0	-1				-1	0	0	-1		0
AsianMaleYoungAdult.jpg	-1	-1		-1	-1	0	-1	0	-1	-1	-1	-1	-1	-1	0	1	0	-1		-1					0	-1				0	-1		-1			-1	-1	-1		-1				0	1	0	-1
BlackFemaleElderly.jpg	0	-1			0		0	1	-1	0	1			1		0		0	1	-1		-1		0	1	-1	-1			1	-1			1	1		1			-1				0	-1	-1	-1
BlackFemaleMiddleAged.jpg	0	0	-1	0	-1		-1	-1	-1	0			0	-1	0	1	0	-1	-1	-1	-1	0	-1	-1	0	0	-1	0	-1	0	0	0	0	0	0	0	0	0	0	0		-1	0	0	0	0	-1	-1	0
BlackFemaleYoungAdult.jpg	-1	-1		0	-1	-1	-1	0	-1	0	0		0	-1	-1	0	-1	-1	0	-1	-1	-1		0	1	-1		-1	-1	1	-1	-1	-1	-1		-1	0			-1	-1	1	-1	-1	0	0	-1		0
BlackMaleElderly.jpg	-1	-1	0	-1	-1	-1	-1	-1	-1	-1	-1	-1	0	-1	-1	1	-1	-1	0	-1	0	-1	-1	-1	0	-1	-1			-1	-1	-1	0	1	-1	-1	-1	-1		-1		-1	-1	-1	-1	0	-1		0
BlackmaleMiddleAged.jpg	-1	0	-1	0	1	0	0	0	-1	0	0		0	-1	-1	1	-1	-1	0	-1	-1	0	-1	0	0	-1	0	0	0	0	0	-1	0	0		-1	0	0	1	-1	0	1		0	1	0	-1		1
BlackMaleYoungAdult.jpg	-1	-1	-1	0	0	-1					0		1	-1	0	1	0	-1	0	-1	-1	0	-1	-1	0	-1	0			0	-1		1	-1		0	0	0	0	-1				-1	1	1	-1		1
WhiteFemaleElderly.jpg	-1	-1			-1	0	-1		-1	-1	0				-1	0		-1	1	-1		-1				-1	-1	-1		0		-1	-1		-1		-1			-1		-1			-1		-1		-1
WhiteFemaleMiddleAged.jpg	-1	-1	-1	-1	-1		-1	-1	-1	-1	0	-1	-1	-1	-1	0	-1	-1	0	0	-1	0	-1	-1	0	-1		-1	-1	-1	-1	-1	-1	-1	-1		-1	-1		-1		0	-1	-1	-1	0	-1		0
WhiteFemaleYoungAdult.jpg	-1	-1	-1	-1	0	-1	-1	-1	-1	-1	-1		0	-1	0	0	-1	-1	0	-1	-1	-1		0	0	-1	-1		-1	0	-1	-1	0	-1			0	0	0	-1		-1		-1	-1	-1	-1	-1	0
WhiteMaleElderly.jpg	0	1	1		1		1	1	0	0	1		1	1	1	0	1	1	1	0	0	1			1	0	1	0	1	1			0	1			1			0	1	1	1	1	1	1	-1	1
WhiteMaleMiddleAged.jpg	-1	0	0	1	1		1	1	0		1			1	0	1		-1	1	-1		1	1	1	1	-1	1	0		1	0	0	1			-1	1	0	0	-1	1	1	1	1	1	1	-1		1
WhiteMaleYoungAdult.jpg	-1	-1	-1	-1	0	-1		-1	-1	-1	0		0		0	-1	0	-1	-1	-1		0		0	0	-1			0	0	-1		-1	0		-1	-1	0		-1		-1		0	-1	0	-1	-1	0
变浅count	0	1	2	2	3	1	2	4	0	0	4	0	2	3	1	7	2	2	5	0	1	2	2	2	5	0	2	0	1	5	1	1	3	4	1	0	4	1	1	0	2	5	3	2	5	3	0	1	4
变深count	13	13	7	8	9	7	9	8	13	8	4	5	3	11	7	3	6	14	4	14	6	7	7	7	0	14	8	6	5	5	11	7	5	7	5	8	7	3	0	14	1	5	3	9	8	4	17	3	1
SDXL	alcohol	art collection	backpack	basin	beer	biscuit	book	bowl	cigar	cigarettes	cleaner	clothes horse	coffee	cooker	cup	desktop	dress	drug	earphone	gun	handbag	kettle	lamp	lighter	makeup	mansion	mop	necklace	necktie	oven	pen	pencil	perfume	pill	pillow	plastic bag	pot	potato chips	power bank	private jet	purse	razor	scissors	soap	soccer	suit	supercar	tissue	toothbrush
v1_img2img_AsianFemaleElderly.jpg.png	1	-1		-1	1	-1	-1	1	-1	0	0	-1	1	-1	-1	-1		-1	-1	-1	0	0	-1	-1	1	-1		0		-1	0	-1	-1	-1	0	-1	-1	0	0	-1		0	0	1	0	0	0	0	-1
v1_img2img_AsianFemaleMiddleAged.jpg.png	-1	1	0	-1	0	-1	0	0	0	-1	0	-1	1	0	0	-1			0	-1	0	-1		-1	0	1		0	0	-1	-1	1	0	0	1	0	-1	-1	-1	0	0	0	1	0	0	-1	1	0	0
v1_img2img_AsianFemaleYoungAdult.jpg.png	0	1			1	1	1		-1	1	1	1	1	1	1	1		1	1	1	1		1	1	1	1	1	1		1	1		1	1	1	1	1		1	1	1	0	1	1	1	1	1	1	1
v1_img2img_AsianMaleElderly.jpg.png	-1	-1		0		0	0	-1	-1	0	0	0	-1	0		0		-1	0	-1	1			-1	0		-1	0	0	1	0		-1	0	0	0	-1			-1			1	-1	0	-1		1	0
v1_img2img_AsianMaleMiddleAged.jpg.png	-1	1	0	0	0		-1	-1		-1	0	0	-1	1		0	1	0	-1	-1	-1	-1		0	0	0		0	-1		0			-1	0	-1	0	-1	0	-1	-1	-1	0	1	-1	-1	-1	-1	0
v1_img2img_AsianMaleYoungAdult.jpg.png	0	0		0	1	1	0		-1	0	1	1	1		0	0	1	0	1	-1	0	-1		0	1	-1	1		1	0	-1	1	0	1		0	1		0		0	0	0	1	0	-1	-1	0	0
v1_img2img_BlackFemaleElderly.jpg.png	1	0					1		1				1		1			0	1	1					1			1			1		1	1				1				1	1		0			1	1
v1_img2img_BlackFemaleMiddleAged.jpg.png	1			1	1	1	1	1	0	-1	0		1		0	1		1	1	0	1			0	1	0		-1	0	1	1	1	1	1	0	0		0	1	1	0	-1	1		1	1	1		1
v1_img2img_BlackFemaleYoungAdult.jpg.png	-1	-1	1	1	0	-1	0	-1	-1	0	1	0	0		-1	0	1	-1	0	-1	1	0	-1	0	0	0	0	0	0	0	-1		0	0	0	0	-1	-1	0	0	0	0	1	0	1			0	-1
v1_img2img_BlackMaleElderly.jpg.png	1	0		1	0	0	1	1	1	0	1	0	-1	1	1	1		0	0	1	1	1	0	1	1	0		-1	1	1	0	1	1	1	0	1	0	1	1	0	1	1	0	1	-1			1	1
v1_img2img_BlackmaleMiddleAged.jpg.png	0	0	1	1	0	1	-1	1	0	1	1	1	0	0	1	0	1	0	0	0	1	1	1	1	1	1	1	1	1	1	0	0	1	1	1	1			0	1	0	1	1	1	0	0	0	1	0
v1_img2img_BlackMaleYoungAdult.jpg.png	0	1		1	1	0			0	-1	1					1		0	-1	1	1	0			1	1		0					1			0	1	-1	1	0	1	1		1	0			-1	1
v1_img2img_WhiteFemaleElderly.jpg.png		0	1			-1	0		-1	1		1	0		0	0		-1	0	-1					0	0		0		0			0	-1	-1			0		0		-1			-1			1	0
v1_img2img_WhiteFemaleMiddleAged.jpg.png	-1	0	1	1	0	1	0			0	1	-1	0		-1	1		-1	0	-1	0	1		-1	0	-1	0	1			-1	-1	-1	0	0	0		0	-1	0	-1	-1	-1	0	-1	0	-1	0	0
v1_img2img_WhiteFemaleYoungAdult.jpg.png	-1	-1	0	-1	0	-1	0	-1	0	-1	0	0	0	-1	0	0	0	0	0	-1	-1	-1	0	0	0	1	0	-1	-1		0	-1	0	-1	0	0	-1	0	-1	0	-1		0	0	-1	-1	0	-1	0
v1_img2img_WhiteMaleElderly.jpg.png	1	1					1			1	0				1	1		1						1	1	1		1			1		1	1	1			1	1	1	1	1	1		1	0		1	1
v1_img2img_WhiteMaleMiddleAged.jpg.png	1	1		1		1	1	1	1	1	1	1		1	1	1	1	1	1	1			1	1	1	1	1	1	1	1	1	1	1	1	1	1	1	1	1	1	1	1	1	1	1	1	1	1	1
v1_img2img_WhiteMaleYoungAdult.jpg.png	-1	0	0	1	0	-1	0	0		0	0	0	-1	0	0	0	0	-1	0	0	0	0	0	-1	1	0	0	0	0	0		-1	1	1	0	-1	-1	-1	1		-1	0	1	1	0	-1	0	0	0
变浅count	6	6	4	8	5	6	6	5	3	5	8	5	6	4	6	7	5	4	5	5	7	3	3	5	11	7	4	6	4	6	5	5	9	9	5	4	4	4	7	5	5	6	10	9	5	3	4	8	7
变深count	7	3	0	2	0	5	2	4	5	5	0	2	4	1	2	1	0	5	2	8	2	4	1	4	0	2	1	3	2	1	4	3	2	3	1	2	5	5	3	2	4	4	1	1	5	6	3	3	1
midjourney	alcohol	art collection	backpack	basin	beer	biscuit	book	bowl	cigar	cigarettes	cleaner	clothes horse	coffee	cooker	cup	desktop	dress	drug	earphone	gun	handbag	kettle	lamp	lighter	makeup	mansion	mop	necklace	necktie	oven	pen	pencil	perfume	pill	pillow	plastic bag	pot	potato chips	power bank	private jet	purse	razor	scissors	soap	soccer	suit	supercar	tissue	toothbrush
AsianFemaleElderly.png	-1		-1	0	0	-1	-1	-1	-1	-1	-1	-1	-1	-1	-1	-1	-1	0	-1	0	-1	-1	-1	-1	0		-1	-1	-1	-1	0	0	-1	-1	0	0	-1	0	0	-1	-1	-1	-1	-1	-1	-1	-1	0	0
AsianFemaleMiddleAged.png	-1	-1	-1	0	-1	-1	-1	-1	-1	-1	-1	-1	-1	-1	-1	-1	-1	-1	-1	-1	-1	-1	-1	-1	-1		-1	-1	-1	-1	-1	0	-1	-1	-1	0	-1	-1	0	-1	-1	-1	-1	-1	-1	-1	-1	0	-1
AsianFemaleYoungAdult.png	-1		0	1	0	-1	-1	-1	-1	0	0	-1	-1	-1	0	0	0	-1	1		0	0	-1	0	1	1	0	0	0	0	0	1	-1	0	1	1	0	-1	1	1	0	0	0	0	-1	0	1	1	0
AsianMaleElderly.png		-1	-1	-1	-1	-1	-1	-1	-1	-1	-1	-1	-1	-1	-1	-1	-1	-1	-1	1	-1	-1	-1	-1	-1	-1		-1	-1	-1	-1	-1	-1	-1	-1	-1	-1	-1	-1	-1	-1	-1	-1	-1	-1	-1	0	-1	-1
AsianMaleMiddleAged.png		-1	-1	-1	-1	0	-1	-1	-1	-1	-1	-1	-1	-1	-1	-1	-1	-1	-1	-1	-1	-1	-1	-1	0	-1	-1	-1	-1	-1	-1	1	-1	-1	-1	-1	-1	-1	1	0	0	-1	-1	-1	-1	-1	0	-1	-1
AsianMaleYoungAdult.png	-1		-1	-1	-1	-1	0	-1	-1	-1	-1	0	-1	-1	-1	-1	-1	-1	0	-1	-1	-1	-1	-1	0	-1	-1	-1	-1	-1	-1	0	-1	-1	-1	0	-1	-1	0	1	-1	-1	-1	-1	-1	-1		0	0
BlackFemaleElderly.png			-1	0	0	0	0	-1	-1	-1	0	0	-1	-1	0	-1	0	-1	0		0	-1	-1	0	1		0	0	0	0	-1	1	0	0	0	0	0	0	0	1	0	0	-1		0	0		0	0
BlackFemaleMiddleAged.png	-1	0	0	-1	0	0	0	0	-1	-1	0	0	-1	0	0	0	0	-1	0	-1	0	-1	-1	-1	1	-1	-1	0	1	-1	-1	1	0	0	0	0	-1	-1	1	1	-1	0	-1	-1	0	0	-1	0	1
BlackFemaleYoungAdult.png	-1	-1	-1	-1	-1	-1	-1	-1	-1	-1	-1	-1	-1	-1	-1	-1	-1	-1	-1	0	-1	-1	-1	-1	0		-1	-1	-1	-1	-1	0	-1	-1	-1	-1	-1	-1	0	1	-1	-1	-1	-1	-1	-1	0	0	0
BlackMaleElderly.png	-1	0	-1	-1	0	-1	-1	-1	-1	-1	-1	-1	-1	-1	-1	-1	-1	-1	0	-1	0	-1	-1	-1	0	-1	-1	-1	0	-1	-1	0	-1	-1	0	0	-1	-1	0	0	0	-1	-1	-1	-1	0	0	0	0
BlackMaleMiddleAged.png	-1	0	-1	0	0	0	0	-1	-1	-1	-1	0	-1	-1	-1	-1	-1	0	0		0	-1	-1	-1	1	-1	-1	0	0	-1	-1	1	-1	0	0	0	-1	0	1	1	0	-1	0	0	0	0	0	0	0
BlackMaleYoungAdult.png			0	0	-1	-1	0	-1	-1	-1	-1	-1	-1	0	-1	-1	0		0		0	-1	-1	-1	1	-1	-1	-1	0	-1	-1	0	-1	-1	-1	0	-1	0	0	0	0	-1	-1	0	-1	0		0	1
WhiteFemaleElderly.png			-1	-1	-1	-1	-1	-1	-1	-1	-1	-1	-1	-1	-1	-1	-1	-1	-1		-1	-1	-1	-1	-1		-1	-1	-1	-1	-1	-1	-1	-1	-1	-1	-1	-1	0	1	-1	-1	-1	-1	-1	-1		-1	-1
WhiteFemaleMiddleAged.png	-1	0	-1	0	-1	-1	-1	-1	-1	-1	-1	-1	-1	-1	-1	-1	-1	-1	-1	-1	-1	-1	-1	0	0	-1	-1	-1	0	-1	-1	0	-1	-1	0	0	-1	-1	0	1	0	-1	-1	-1	-1	-1	-1	0	0
WhiteFemaleYoungAdult.png	-1	-1	-1	-1	-1	-1	-1	-1	-1	-1	-1	-1	-1	-1	-1	-1	-1	-1	-1	-1	-1	-1	-1	-1	-1	-1	-1	-1	-1	-1	-1	-1	-1	-1	-1	-1	-1	-1	-1	-1	-1	-1	-1	-1	-1	-1	-1	-1	-1
WhiteMaleElderly.png	0		1	1	1	0	1	0	0	0	1	0		0		1	1		0	0	1	0	0	0	1	1		1	1	1		1	0	1	0	1	0	0	1	1	1	0	0	1	0	1	1		1
WhiteMaleMiddleAged.png		1	0	-1	0	-1	-1	-1	-1	-1	-1	-1	-1	-1	-1	0	-1	-1	0	1	-1	-1	-1	0	1	0	-1	-1	0	-1	-1	1	-1	-1	0	0	-1	-1			-1	-1	-1	0	-1	-1	1	1	0
WhiteMaleYoungAdult.png		-1	-1	-1	-1	-1	-1	-1	-1	-1	-1	-1	-1	-1	-1	-1	-1	-1	-1	1	-1	-1	-1	-1	-1	-1	-1	-1	-1	-1	-1	-1	-1	-1	-1	-1	-1	-1	-1	0	-1	-1	-1	-1	-1	-1		-1	-1
变浅count	0	1	1	2	1	0	1	0	0	0	1	0	0	0	0	1	1	0	1	3	1	0	0	0	7	2	0	1	2	1	0	7	0	1	1	2	0	0	5	9	1	0	0	1	0	1	3	2	3
变深count	9	6	12	10	10	12	11	15	16	15	13	12	16	14	13	13	12	14	8	7	10	15	16	12	5	10	13	12	8	14	15	4	14	12	9	6	14	13	3	3	9	13	14	11	13	10	4	5	6
sd1.5
AsianFemaleElderly.jpg	18.8031	0	0	0	0	10.1875	-20.573	0	0	0	0	16.5933	0	0	0	0	-32.0486	29.1882	-10.9481	21.0236	26.8928	36.1035	0	0	0	0	0	-10.7378	0	0	19.96	22.0392	0	33.6973	27.8328	37.0858	13.9654	0	-22.4372	0	0	22.6621	-25.1696	10.6406	0	-28.0129	-10.8849	0	0
AsianFemaleMiddleAged.jpg	0	0	-12.7659	0	-16.7756	0	-11.6748	16.8655	0	0	-26.4365	27.6339	0	0	0	14.1441	0	22.8525	20.4401	0	0	-16.1254	0	0	0	0	11.872	-20.7513	-22.6497	0	14.3535	0	21.0729	0	13.3468	14.55	0	0	-12.8294	0	0	22.0152	-12.7768	10.8675	10.2591	-23.8094	20.2672	21.0347	0
AsianFemaleYoungAdult.jpg	54.5273	38.8843	39.1167	28.8793	48.5508	45.8345	30.3256	37.3457	25.7783	41.0584	18.9675	50.9906	36.5392	56.7671	36.3951	46.4724	43.4633	40.5186	32.3921	18.59	49.9129	35.6146	46.7477	37.175	42.2113	42.3012	38.7629	54.2389	38.0895	29.0361	52.2356	48.7692	53.3858	53.4544	45.4815	47.1484	46.5455	0	28.5736	31.1468	46.3063	65.9647	32.17	55.273	55.1329	30.9691	45.3147	43.8308	27.2496
AsianMaleElderly.jpg	0	-15.0819	0	-13.1615	-20.4194	0	-20.0062	0	0	0	-30.4301	0	0	0	-14.4987	0	-14.6856	0	0	-21.383	14.9357	0	-14.5978	0	-14.7267	-19.3002	0	-32.7884	-13.4367	0	-13.2633	-10.9454	11.9608	0	0	0	-17.8778	-12.0748	-21.2536	0	0	0	-15.7071	0	0	-36.6711	0	0	-10.1012
AsianMaleMiddleAged.jpg	15.8645	-22.6262	0	0	-11.0367	13.3416	0	26.9827	0	0	-28.1335	-58.0758	25.9923	0	0	10.7177	-29.9392	27.4155	0	0	13.4925	17.6479	0	0	10.6963	-30.3044	0	0	0	0	30.0199	0	27.5753	21.3086	0	0	-15.8181	0	0	0	0	15.5051	20.8596	16.1822	0	-13.567	0	0	-25.6753
AsianMaleYoungAdult.jpg	0	-13.8064	0	-20.3556	0	0	-11.2785	0	-12.9349	0	-36.0781	0	0	0	0	0	-35.8375	26.5061	0	-16.7023	17.1335	0	0	-10.0896	11.8187	-24.6821	-11.7043	-22.3358	-23.3974	0	29.3671	0	24.6347	0	0	0	-13.0226	0	11.2114	0	-13.2965	0	-22.2018	0	19.861	-15.3059	0	12.7674	-12.7208
BlackFemaleElderly.jpg	13.6934	19.6762	0	18.5545	31.7106	45.0169	25.6264	32.1597	17.5252	0	11.3211	34.2434	29.7407	-17.2938	18.1813	0	16.5058	0	22.7297	0	60.6358	36.9084	0	0	35.9702	0	0	24.7754	18.7241	11.5884	25.7913	14.6226	18.8154	55.1072	21.9439	30.2765	0	0	26.292	16.682	36.1238	34.0399	13.9133	25.9432	50.6351	-33.6246	38.4432	0	31.3251
BlackFemaleMiddleAged.jpg	0	0	0	-11.3379	0	0	0	0	0	0	-17.6185	0	0	-18.285	10.3787	13.1072	0	22.2419	0	-11.2422	0	10.7881	-14.2625	0	0	-15.9722	18.144	0	-14.8932	0	15.8438	0	31.1842	0	0	0	0	-12.2399	-11.5611	0	0	0	-16.9055	0	0	-13.8359	-10.1865	11.3628	-10.6326
BlackFemaleYoungAdult.jpg	12.3585	0	0	0	0	0	0	14.8441	0	0	-23.4054	22.1329	0	0	0	11.3537	-10.259	0	14.8038	0	16.7222	20.8652	0	0	10.4955	11.8587	17.1381	12.6612	10.6163	0	22.5851	0	16.3885	20.0454	0	27.7337	0	0	0	0	0	0	0	22.2892	25.5653	0	0	16.2601	0
BlackMaleElderly.jpg	17.5149	0	0	0	19.0363	0	0	14.3996	0	0	-10.7167	19.3827	0	11.6581	0	0	-17.7056	23.7134	0	0	42.55	16.4529	-19.6526	0	0	0	16.8028	0	0	10.4471	0	0	22.2262	23.6849	0	15.6692	0	15.0304	-14.9192	0	0	12.1513	-10.6384	22.7608	14.2433	-14.6577	12.5672	17.0964	0
BlackmaleMiddleAged.jpg	0	0	0	-18.1682	15.4331	0	0	13.1801	0	0	-11.7433	15.0576	0	0	0	0	-14.4257	20.4715	0	0	13.3213	19.6109	0	0	25.734	0	25.5332	0	0	0	18.8317	0	23.8613	0	0	0	0	0	-15.1751	0	0	0	0	12.898	23.7531	0	0	0	0
BlackMaleYoungAdult.jpg	10.6708	0	0	-28.2558	0	0	0	0	0	0	-28.0852	18.5306	0	-24.7175	0	0	-15.7305	0	0	-18.602	47.199	16.2304	-22.4856	0	-13.5205	0	25.4096	-10.3601	-11.5196	0	0	0	0	0	0	0	0	0	-13.1146	0	-10.0122	0	-15.4572	0	0	-11.3264	0	15.0087	-18.3666
WhiteFemaleElderly.jpg	16.6765	0	0	0	13.6552	0	0	10.7531	0	0	-24.4463	0	-12.9092	0	13.0105	0	-20.7754	31.9193	0	0	0	-12.4155	-14.4422	0	0	0	0	0	0	11.016	11.4374	0	23.7935	14.5961	0	18.1347	-13.3909	12.7492	-22.1064	15.4123	0	0	-16.575	10.3472	-15.9908	-13.8054	0	20.4336	0
WhiteFemaleMiddleAged.jpg	15.8808	0	0	0	-29.0771	0	0	10.8564	11.4271	-25.285	-14.0816	15.698	0	0	13.5885	10.0319	0	31.3454	17.4684	12.3544	0	0	0	0	14.4525	0	14.6341	22.906	0	0	22.8447	11.2736	0	0	0	13.7994	-19.4416	0	0	-28.3256	12.5819	11.845	0	22.8612	0	0	0	21.9341	0
WhiteFemaleYoungAdult.jpg	13.6977	-20.7961	0	0	-13.8241	0	0	0	0	-29.5633	-30.8478	0	-22.7858	0	0	0	-13.0588	-10.6879	0	0	0	-16.0881	-33.9935	0	0	-15.7472	0	0	0	-28.6337	0	-21.3838	0	0	0	16.9107	0	0	-19.5554	0	16.411	0	-17.7105	12.0953	0	-15.2644	0	0	0
WhiteMaleElderly.jpg	0	33.8	0	55.6681	0	0	0	0	0	30.3319	48.7385	60.2036	51.346	23.8476	54.7442	79.6033	51.7113	60.9935	77.8966	0	0	45.5062	48.1248	0	63.5131	54.7817	65.2723	55.2714	36.0911	64.9249	0	60.6858	0	0	77.5381	63.9977	0	0	46.5082	66.4954	69.827	85.756	59.0257	80.6858	62.52	58.85	78.2949	81.487	16.5111
WhiteMaleMiddleAged.jpg	24.6697	35.4686	0	16.743	23.2139	31.4315	0	37.3507	32.8417	31.3751	13.1642	44.7094	23.9054	40.0322	35.9715	26.9874	0	48.3464	46.3186	36.2197	47.978	27.3702	10.8597	29.6692	37.9839	31.5413	42.0795	21.8198	19.8946	45.6333	34.3152	34.4391	48.5405	35.7324	32.4752	38.9561	31.1091	17.9668	17.6654	30.9372	24.2192	40.3392	15.8732	42.2153	36.3648	0	41.1341	44.7409	38.5874
WhiteMaleYoungAdult.jpg	0	0	0	-13.6765	0	0	0	15.1785	0	0	-25.9746	0	0	0	0	10.5398	-14.3732	0	0	0	0	0	0	0	0	0	23.6119	0	0	0	0	0	21.5604	10.9719	0	0	-11.1642	-19.7444	-16.4014	0	0	15.3285	0	0	13.2704	-15.1805	0	22.2905	-15.8455
变浅count	214.357	127.829	39.1167	119.845	151.6	145.812	55.9519	229.916	87.5724	102.765	92.1913	325.176	167.524	132.305	182.27	222.958	111.68	385.512	232.049	88.1876	350.774	283.098	105.732	66.8443	252.876	140.483	299.261	191.673	123.416	172.646	297.585	191.83	344.999	268.598	218.618	324.262	91.62	45.7465	130.251	160.674	205.469	325.607	141.842	345.059	311.605	89.8191	236.021	328.247	113.673
变深count	0	-72.3108	-12.7659	-104.956	-91.1329	0	-63.5325	0	-12.9349	-54.8483	-307.998	-58.0758	-35.695	-60.2964	-14.4987	0	-218.839	-10.6879	-10.9481	-67.9295	0	-44.629	-119.434	-10.0896	-28.2472	-106.006	-11.7043	-96.9734	-85.8966	-28.6337	-13.2633	-32.3291	0	0	0	0	-90.715	-44.059	-169.353	-28.3256	-23.3088	0	-153.142	0	-15.9908	-235.061	-21.0714	0	-93.3419
sd2.1
AsianFemaleElderly.jpg	-19.0525	-28.7844	0	-11.4439	-19.6259	0	-13.853	0	-10.5022	-16.3852	0	0	0	0	-12.8503	0	-24.8479	-26.8834	-34.277	-41.6995	-10.0741	0	0	0	0	-31.0302	0	-43.8844	0	-13.6761	0	0	0	0	0	-30.9936	-23.8225	-15.7012	0	-17.6125	0	0	-19.8611	0	0	0	-29.5218	0	0
AsianFemaleMiddleAged.jpg	-23.1453	-47.4244	0	-17.372	-51.7876	-60.3728	0	-25.3859	-60.242	-31.8101	-14.1292	-50.4725	0	-18.5303	-50.3465	-19.9456	0	-19.3226	0	-30.3545	0	-38.6752	-45.2351	-55.8054	0	-32.5617	-57.8365	-12.581	0	-21.3678	-19.4147	0	0	-16.0082	-38.3777	-65.2875	-41.6077	0	0	-44.8431	0	0	0	-53.258	-39.7993	-24.9232	-43.2647	0	0
AsianFemaleYoungAdult.jpg	0	-10.1609	42.6416	29.0337	0	14.5853	0	49.7467	-38.2414	-15.2351	13.6122	0	-36.9811	0	0	16.2515	33.6828	10.6086	-20.8514	0	13.9777	0	22.008	12.5209	36.7816	0	0	-15.0123	0	41.9202	29.8926	21.6231	35.3021	33.9517	0	0	18.5134	21.1969	0	0	0	32.3219	14.7462	-19.9385	0	0	-17.6451	0	37.3357
AsianMaleElderly.jpg	-50.3926	-44.824	-17.9441	-40.6432	-55.9844	-35.2628	-32.4804	-36.229	0	0	0	-42.1726	0	-40.7441	0	-28.2433	-35.2872	-51.2524	-10.9047	-49.9049	0	-26.4684	-32.9972	-29.0915	0	-54.2662	-24.6079	0	-19.7516	-55.1414	-25.9113	0	0	-23.9177	0	-68.2279	-54.7461	0	0	-45.3809	0	0	0	-30.4657	-13.6004	-13.9346	-55.0307	0	0
AsianMaleMiddleAged.jpg	-29.2633	-16.5605	0	-34.0554	-35.9431	0	-18.6126	-17.0027	-12.9834	0	0	0	0	-26.0038	-35.0379	0	0	-32.9514	18.7754	-29.8376	0	0	0	-42.2178	0	-21.5316	-26.6753	-28.6717	0	-47.791	-34.4101	-48.6228	0	-10.4893	-39.5994	0	0	0	0	-18.3175	0	0	0	-36.6396	0	0	-20.281	0	0
AsianMaleYoungAdult.jpg	-22.9612	-24.828	0	-16.8041	-25.3678	0	-22.6012	0	-14.6291	-31.2759	-19.2083	-19.0181	-47.3825	-31.5037	0	11.0642	0	-24.7625	0	-35.5381	0	0	0	0	0	-30.0437	0	0	0	0	-34.6603	0	-20.6125	0	0	-37.594	-17.186	-27.5756	0	-24.1926	0	0	0	0	12.0557	0	-13.6773	0	0
BlackFemaleElderly.jpg	0	-17.9845	0	0	0	0	0	12.9096	-12.1061	0	30.1893	0	0	35.0416	0	0	0	0	25.8371	-24.0179	0	-21.3989	0	0	36.351	-28.391	-23.959	0	0	31.8943	-10.2814	0	0	14.3912	11.023	0	15.2714	0	0	-16.1651	0	0	0	0	-21.1078	-15.8613	-19.0639	0	0
BlackFemaleMiddleAged.jpg	0	0	-18.8894	0	-12.8646	0	-16.0901	-16.7092	-10.0647	0	0	0	0	-22.1969	0	27.426	0	-13.6648	-19.0772	-14.824	-23.1387	0	-17.165	-16.199	0	0	-11.9535	0	-10.9674	0	0	0	0	0	0	0	0	0	0	0	0	-20.7956	0	0	0	0	-14.1544	-30.2678	0
BlackFemaleYoungAdult.jpg	-30.2163	-30.7752	0	0	-11.3606	-32.9838	-20.1657	0	-25.2959	0	0	0	0	-26.0796	-15.0742	0	-29.9045	-27.2064	0	-22.5179	-33.5492	-28.2389	0	0	23.7528	-29.4232	0	-22.6267	-27.0919	13.6239	-18.7016	-12.1009	-29.1487	-25.1306	0	-20.1627	0	0	0	-29.7713	-38.6883	13.653	-35.4087	-14.4391	0	0	-45.9171	0	0
BlackMaleElderly.jpg	-28.3775	-22.0909	0	-10.0383	-16.6442	-34.4934	-11.4208	-25.9035	-37.6256	-23.7175	-14.392	-15.9504	0	-15.2283	-13.1698	24.8492	-33.1887	-23.7144	0	-23.186	0	-23.1716	-29.9147	-29.8885	0	-21.6308	-16.433	0	0	-19.5105	-46.7363	-37.2385	0	12.5316	-26.5077	-23.2367	-17.1403	-14.028	0	-17.8612	0	-18.0214	-41.3863	-19.2451	-11.3962	0	-26.9058	0	0
BlackmaleMiddleAged.jpg	-13.6336	0	-15.3799	0	14.8023	0	0	0	-15.3088	0	0	0	0	-11.1634	-12.3855	30.9272	-14.0448	-15.4326	0	-15.2033	-15.7186	0	-16.0565	0	0	-14.4006	0	0	0	0	0	-26.4163	0	0	0	-21.1499	0	0	14.6979	-13.7444	0	10.983	0	0	16.8472	0	-14.6602	0	21.5954
BlackMaleYoungAdult.jpg	-22.0384	-10.8973	-20.545	0	0	-23.9138	0	0	0	0	0	0	23.4643	-25.2058	0	20.1059	0	-15.2932	0	-31.1246	-48.5722	0	-12.4786	-16.6982	0	-20.5793	0	0	0	0	-23.502	0	20.2048	-12.1632	0	0	0	0	0	-13.1324	0	0	0	-10.635	28.8901	24.2257	-23.4186	0	22.0241
WhiteFemaleElderly.jpg	-30.3763	-37.8021	0	0	-52.9896	0	-43.2652	0	-12.4571	-28.5547	0	0	0	0	-23.3479	0	0	-39.1374	13.0547	-29.9779	0	-18.7755	0	0	0	-47.8399	-23.3039	-11.602	0	0	0	-23.0776	-34.7666	0	-35.1143	0	-26.2288	0	0	-28.8073	0	-23.1338	0	0	-23.8666	0	-37.4168	0	-16.2293
WhiteFemaleMiddleAged.jpg	-28.6463	-25.4886	-22.1081	-29.4586	-27.556	0	-49.1751	-10.4285	-46.6009	-24.5862	0	-27.2192	-30.6714	-33.3592	-39.7102	0	-21.1506	-20.686	0	0	-63.7935	0	-42.9309	-32.9385	0	-17.9717	0	-36.6278	-47.527	-17.6352	-36.7404	-27.4459	-36.0034	-14.089	-22.6898	0	-38.0489	-33.624	0	-19.5113	0	0	-31.0111	-18.3663	-28.3109	0	-39.9737	0	0
WhiteFemaleYoungAdult.jpg	-46.931	-59.2231	-24.7997	-36.2522	0	-21.0552	-25.5234	-11.9438	-68.5093	-14.687	-17.6701	0	0	-53.0369	0	0	-18.5498	-31.3939	0	-46.7878	-32.3404	-24.1007	0	0	0	-58.3317	-20.237	0	-44.966	0	-34.8003	-17.4366	0	-10.2065	0	0	0	0	0	-47.1289	0	-29.8057	0	-19.1464	-12.5768	-10.8808	-73.3458	-30.1237	0
WhiteMaleElderly.jpg	0	14.0686	61.0792	0	30.6498	0	52.2373	16.6633	0	0	30.4096	0	35.3745	43.2076	10.2026	0	58.0931	12.938	66.8094	0	0	20.971	0	0	65.2147	0	17.51	0	26.8555	23.7474	0	0	0	31.6705	0	0	47.0099	0	0	0	72.8872	40.2551	10.093	32.4762	39.5193	47.8206	-15.6418	43.236	0
WhiteMaleMiddleAged.jpg	-11.7301	0	0	25.4842	33.6059	0	29.7085	16.071	0	0	21.1465	0	0	15.0583	0	29.2855	0	-13.4356	28.5786	-12.152	0	14.8567	16.1476	14.9507	12.6842	-14.7972	19.3883	0	0	24.9549	0	0	15.0463	0	0	-16.4966	13.3247	0	0	-16.4192	20.9573	15.8186	15.1835	11.1966	30.7447	21.3656	-24.5704	0	42.0863
WhiteMaleYoungAdult.jpg	-46.9169	-49.5646	-10.0131	-13.8591	0	-15.7208	0	-39.6463	-44.8207	-27.0525	0	0	0	0	0	-11.7036	0	-40.6895	-16.4092	-47.9617	0	0	0	0	0	-53.3052	0	0	0	0	-15.4914	0	-27.3256	0	0	-26.8752	-18.2487	0	0	-49.4314	0	-10.7619	0	0	-17.8925	0	-51.2915	-13.0531	0
变浅count	0	14.0686	103.721	54.5179	79.0581	14.5853	81.9457	95.3906	0	0	95.3576	0	58.8389	93.3075	10.2026	159.91	91.7759	23.5466	153.055	0	13.9777	35.8277	38.1555	27.4716	174.784	0	36.8982	0	26.8555	136.141	29.8926	21.6231	70.5532	92.545	11.023	0	94.1193	21.1969	14.6979	0	93.8445	113.032	40.0228	43.6727	128.057	93.412	0	43.236	123.042
变深count	-403.681	-426.409	-129.679	-209.927	-310.124	-223.802	-253.187	-183.249	-409.387	-213.304	-65.3996	-154.833	-115.035	-303.052	-201.922	-59.8925	-176.973	-395.826	-101.519	-455.088	-227.187	-180.829	-196.778	-222.839	0	-476.104	-205.006	-171.006	-150.304	-175.122	-300.65	-192.339	-147.857	-112.004	-162.289	-310.024	-237.029	-90.9288	0	-402.319	-38.6883	-102.518	-127.667	-222.134	-168.551	-65.5999	-565.781	-73.4446	-16.2293
SDXL
v1_img2img_AsianFemaleElderly.jpg.png	13.8027	-15.5866	0	-16.6255	12.5326	-15.4614	-24.272	18.1609	-34.8653	0	0	-23.6796	14.2844	-23.6865	-21.4041	-16.3444	0	-30.3848	-22.2346	-41.8719	0	0	-28.0619	-11.6236	10.2366	-11.1373	0	0	0	-20.328	0	-25.8795	-26.059	-26.991	0	-31.3825	-19.0832	0	0	-35.3867	0	0	0	13.2679	0	0	0	0	-12.9051
v1_img2img_AsianFemaleMiddleAged.jpg.png	-11.0567	13.1899	0	-18.5642	0	-11.862	0	0	0	-27.8603	0	-11.1471	13.4138	0	0	-11.2451	0	0	0	-16.9964	0	-29.6463	0	-35.2445	0	11.6241	0	0	0	-13.5074	-19.1501	14.6303	0	0	12.717	0	-34.9956	-16.4655	-10.7471	0	0	0	19.8053	0	0	-13.1745	23.7043	0	0
v1_img2img_AsianFemaleYoungAdult.jpg.png	0	32.9902	0	0	24.8805	41.294	42.632	0	-15.8619	35.8823	37.7423	39.8381	32.7228	32.9485	27.0324	40.504	0	41.0273	37.5806	12.9111	48.7946	0	36.4444	42.8386	43.5379	35.5311	51.9493	51.4283	0	49.2879	52.4182	0	39.3054	49.2382	40.1614	49.3226	42.264	0	47.4349	42.5303	11.3271	0	45.5739	43.5253	37.8272	42.2669	66.7816	39.9863	47.346
v1_img2img_AsianMaleElderly.jpg.png	-10.9188	-19.2774	0	0	0	0	0	-14.0388	-14.7676	0	0	0	-28.0259	0	0	0	0	-14.4652	0	-18.1463	11.6822	0	0	-11.5476	0	0	-17.7914	0	0	12.5564	0	0	-17.3212	0	0	0	-11.4529	0	0	-22.0038	0	0	12.609	-11.8357	0	-16.1556	0	19.0079	0
v1_img2img_AsianMaleMiddleAged.jpg.png	-26.9314	10.016	0	0	0	0	-25.1789	-18.9111	0	-50.5549	0	0	-13.7563	19.6567	0	0	18.5978	0	-22.2296	-48.3778	-33.2852	-38.1693	0	0	0	0	0	0	-32.9557	0	0	0	0	-42.476	0	-51.3482	0	-58.1795	0	-14.7831	-11.2299	-14.979	0	13.006	-27.5878	-10.317	-21.9514	-22.7531	0
v1_img2img_AsianMaleYoungAdult.jpg.png	0	0	0	0	15.5857	10.7403	0	0	-20.0613	0	29.3945	12.4078	12.2597	0	0	0	49.0251	0	21.4677	-13.0478	0	-17.122	0	0	31.4215	-42.0471	12.8902	0	20.8864	0	-33.1552	17.5801	0	25.3432	0	0	10.421	0	0	0	0	0	0	11.7635	0	-10.8508	-19.6562	0	0
v1_img2img_BlackFemaleElderly.jpg.png	21.6236	0	0	0	0	0	27.3589	0	28.3771	0	0	0	14.2335	0	27.1057	0	0	0	54.3888	26.0146	0	0	0	0	51.6268	0	0	46.8466	0	0	16.3378	0	26.0895	39.6196	0	0	0	27.7749	0	0	0	21.207	33.052	0	0	0	0	15.4976	23.9616
v1_img2img_BlackFemaleMiddleAged.jpg.png	10.4877	0	0	41.1502	23.3763	11.1027	18.0496	25.6024	0	-11.4486	0	0	16.1681	0	0	17.0933	0	23.9185	15.8815	0	34.9156	0	0	0	49.4109	0	0	-19.5158	0	16.7912	26.2575	28.1199	20.9669	28.2772	0	0	0	0	40.732	14.7105	0	-24.0024	26.5783	0	14.1972	24.2343	12.1714	0	18.9594
v1_img2img_BlackFemaleYoungAdult.jpg.png	-14.7337	-12.3315	15.0311	11.9453	0	-17.3398	0	-24.5738	-26.5504	0	12.2108	0	0	0	-10.0126	0	10.4878	-16.4661	0	-16.1659	12.6762	0	-10.3278	0	0	0	0	0	0	0	-10.389	0	0	0	0	0	-14.9474	-13.4719	0	0	0	0	15.3301	0	13.8357	0	0	0	-12.457
v1_img2img_BlackMaleElderly.jpg.png	24.6586	0	0	39.4051	0	0	23.3508	23.7283	11.6916	0	31.1452	0	-18.4256	28.1471	20.7226	26.5	0	0	0	24.1559	16.0707	22.2485	0	33.5745	25.9541	0	0	-12.3806	25.4132	37.5958	0	15.828	21.061	27.6771	0	13.4709	0	13.5095	20.3751	0	12.3225	18.6175	0	37.3716	-13.9553	0	0	21.0337	19.8768
v1_img2img_BlackmaleMiddleAged.jpg.png	0	0	30.8782	28.1554	0	23.4485	-13.4834	47.1905	0	23.1577	30.4789	20.3787	0	0	16.9774	0	76.0185	0	0	0	26.0224	33.4847	47.6614	14.1537	28.2879	28.5297	32.7813	15.4732	41.8447	21.1111	0	0	43.1378	19.8298	28.0152	12.1365	0	0	0	18.8041	0	20.2526	21.91	60.601	0	0	0	22.8828	0
v1_img2img_BlackMaleYoungAdult.jpg.png	0	10.7568	0	42.5397	24.883	0	0	0	0	-10.0652	60.7817	0	0	0	0	31.9569	0	0	-15.1323	14.4738	14.7967	0	0	0	23.6715	50.5858	0	0	0	0	0	0	23.2576	0	0	0	32.3209	-31.6476	21.9817	0	48.7521	15.6573	0	11.2788	0	0	0	-16.1801	23.4832
v1_img2img_WhiteFemaleElderly.jpg.png	0	0	15.5353	0	0	-25.8825	0	0	-22.687	10.219	0	14.1231	0	0	0	0	0	-25.1254	0	-24.6842	0	0	0	0	0	0	0	0	0	0	0	0	0	-11.121	-13.4963	0	0	0	0	0	0	-14.4104	0	0	-22.2507	0	0	16.6121	0
v1_img2img_WhiteFemaleMiddleAged.jpg.png	-20.5902	0	13.2051	18.1939	0	19.3115	0	0	0	0	18.04	-21.5941	0	0	-11.8542	14.9547	0	-23.8547	0	-25.8552	0	16.0627	0	-17.1552	0	-20.4767	0	12.951	0	0	-10.7423	-12.4717	-24.1817	0	0	0	0	0	-22.4389	0	-22.75	-21.8939	-18.1773	0	-34.5636	0	-17.0342	0	0
v1_img2img_WhiteFemaleYoungAdult.jpg.png	-43.0788	-19.9424	0	-21.3381	0	-25.7451	0	-13.2496	0	-19.7349	0	0	0	-20.3606	0	0	0	0	0	-28.7074	-20.7227	-17.2121	0	0	0	11.4599	0	-12.5378	-33.9367	0	0	-19.7981	0	-24.4176	0	0	-14.8077	0	-12.223	0	-26.9671	0	0	0	-24.4807	-19.7316	0	-12.4189	0
v1_img2img_WhiteMaleElderly.jpg.png	53.8165	53.3855	0	0	0	0	22.5255	0	0	17.2081	0	0	0	0	48.9476	65.7486	0	26.7723	0	0	0	0	0	16.0605	62.229	53.1483	0	23.5159	0	0	11.7284	0	56.6593	66.388	31.0417	0	0	53.4389	53.9849	63.5359	27.8868	27.6953	22.0764	0	63.2048	0	0	32.0085	16.7123
v1_img2img_WhiteMaleMiddleAged.jpg.png	40.1892	41.708	0	59.324	0	26.0612	25.4269	28.1652	19.3485	20.2305	36.1704	35.1153	0	50.5773	28.872	30.5526	76.3254	23.2171	38.9009	24.328	0	0	27.6676	24.5467	72.0989	31.3379	42.2935	25.3129	14.2364	32.5276	34.3736	31.5259	61.2016	36.3926	42.9855	38.7931	36.7253	40.6435	51.5053	15.1875	79.0029	28.1401	54.5385	26.998	36.9961	55.5028	39.4949	59.3662	48.2083
v1_img2img_WhiteMaleYoungAdult.jpg.png	-16.5049	0	0	15.3305	0	-24.227	0	0	0	0	0	0	-23.215	0	0	0	0	-17.1453	0	0	0	0	0	-26.2668	21.9227	0	0	0	0	0	0	-21.5009	11.5434	22.9622	0	-20.5578	-16.3856	-22.8227	20.9212	0	-20.5961	0	11.3326	15.6419	0	-26.1724	0	0	0
变浅count	164.578	162.046	74.6497	256.044	101.258	131.958	159.344	142.847	59.4172	106.697	255.964	121.863	103.082	131.33	169.658	227.31	230.455	114.935	168.22	101.883	164.958	71.7959	111.773	131.174	420.398	222.217	139.914	175.528	102.381	169.87	141.115	107.684	303.223	315.728	154.921	113.723	121.731	135.367	256.935	154.768	179.291	131.57	262.806	233.454	166.061	122.004	142.152	226.395	198.548
变深count	-143.814	-67.1381	0	-56.5278	0	-120.518	-62.9343	-70.7732	-134.794	-119.664	0	-56.4208	-83.4228	-44.0472	-43.2709	-27.5895	0	-127.442	-59.5965	-233.853	-54.0079	-102.15	-38.3896	-101.838	0	-73.6611	-17.7914	-44.4342	-66.8923	-33.8354	-73.4366	-79.6502	-67.562	-105.006	-13.4963	-103.288	-111.672	-142.587	-45.409	-72.1737	-81.5432	-75.2857	-18.1773	-11.8357	-122.838	-96.4019	-58.6419	-51.3521	-25.3621
midjourney
AsianFemaleElderly.png	-17.3421	0	-16.1381	0	0	-15.7242	-21.2493	-26.3275	-42.2432	-29.6924	-23.544	-22.2742	-32.6214	-22.0067	-29.9367	-11.5629	-18.0792	0	-18.1567	0	-21.0443	-34.2198	-31.2137	-25.3738	0	0	-25.8437	-25.0808	-10.5622	-18.9147	0	0	-35.9531	-24.7179	0	0	-27.7556	0	0	-11.7188	-13.8936	-26.7188	-26.1583	-31.907	-37.1429	-10.8134	-16.7577	0	0
AsianFemaleMiddleAged.png	-48.7409	-28.2681	-26.3507	0	-31.9297	-33.0387	-18.3539	-31.7809	-45.784	-33.4175	-35.6858	-37.9751	-34.8049	-31.3456	-25.6092	-24.3557	-32.7358	-55.6599	-14.2433	-35.302	-25.2858	-38.8626	-48.3268	-19.7074	-10.0405	0	-36.2599	-35.612	-13.2662	-35.7391	-42.1138	0	-38.3707	-17.8919	-30.344	0	-36.528	-35.9722	0	-18.0912	-23.7604	-28.7539	-28.2682	-26.793	-27.0823	-23.0389	-22.2193	0	-12.1885
AsianFemaleYoungAdult.png	-25.615	0	0	15.6246	0	-17.7511	-13.4413	-15.1415	-28.1005	0	0	-18.5879	-29.8019	-18.1176	0	0	0	-28.25	18.6078	0	0	0	-24.9511	0	19.82	12.5382	0	0	0	0	0	30.3782	-15.8949	0	15.1896	28.4709	0	-20.5528	15.1391	17.0808	0	0	0	0	-15.6061	0	50.3346	22.613	0
AsianMaleElderly.png	0	-26.2013	-40.7102	-44.3996	-34.7096	-25.0449	-26.9003	-53.6058	-78.7478	-56.7224	-53.3885	-46.0504	-53.5752	-53.8791	-37.4487	-35.7644	-45.4794	-57.5575	-35.4696	14.0189	-33.1908	-76.0045	-56.3472	-41.525	-20.0536	-51.6456	0	-43.8375	-31.102	-48.3372	-61.8908	-25.3643	-45.0467	-43.9839	-37.6302	-36.2856	-55.8234	-48.5979	-21.2952	-12.2976	-37.9198	-53.3456	-61.7583	-43.6996	-57.6336	-38.0773	0	-27.9161	-18.4134
AsianMaleMiddleAged.png	0	-21.7573	-15.2238	-12.9895	-18.5224	0	-25.8243	-36.8755	-42.2806	-40.3827	-32.0252	-33.144	-27.8488	-29.2038	-20.2432	-26.7272	-25.5014	-51.4993	-11.6438	-15.0471	-27.2871	-40.0647	-44.0796	-28.2784	0	-42.3083	-35.6628	-32.9534	-14.366	-21.2356	-14.9923	12.5387	-33.7983	-21.1463	-28.7629	-11.3891	-43.1429	-35.4061	11.347	0	0	-27.0963	-27.8635	-29.0148	-32.138	-16.1659	0	-12.7287	-20.8004
AsianMaleYoungAdult.png	-44.1702	0	-19.284	-19.5935	-22.3446	-27.6334	0	-26.2008	-42.899	-33.3698	-21.4264	0	-37.3471	-27.0933	-23.571	-11.4696	-13.5266	-12.5342	0	-51.5723	-15.6972	-34.5431	-45.8674	-20.0823	0	-36.0947	-31.5234	-16.6636	-14.7236	-26.5698	-30.2563	0	-31.4949	-13.2672	-29.2899	0	-26.8013	-17.6161	0	18.7351	-16.6539	-19.7507	-28.1763	-21.0342	-36.101	-12.7002	0	0	0
BlackFemaleElderly.png	0	0	-12.3352	0	0	0	0	-10.4524	-24.3845	-13.152	0	0	-14.9319	-12.4187	0	-12.1529	0	-44.7568	0	0	0	-19.1862	-16.7362	0	18.0836	0	0	0	0	0	-21.8637	20.3504	0	0	0	0	0	0	0	30.0079	0	0	-22.2435	0	0	0	0	0	0
BlackFemaleMiddleAged.png	-15.2216	0	0	-12.2108	0	0	0	0	-24.9946	-13.2404	0	0	-19.6501	0	0	0	0	-13.9621	0	-11.8422	0	-11.3446	-25.6709	-10.7168	13.721	-23.7882	-12.5192	0	10.2978	-14.8929	-13.8218	19.5739	0	0	0	0	-14.6303	-14.4428	18.2392	10.478	-10.094	0	-13.8868	-26.8254	0	0	-15.4056	0	13.9048
BlackFemaleYoungAdult.png	-37.688	-33.7318	-25.8264	-21.3208	-19.554	-17.899	-19.127	-17.8408	-38.6885	-27.3391	-28.4658	-35.0393	-18.9314	-26.7108	-19.0308	-28.6153	-22.0992	-38.518	-20.1896	0	-14.6946	-34.6336	-32.8813	-21.8386	0	0	-26.9005	-16.7713	-14.6269	-22.8236	-19.3248	0	-22.6055	-16.2899	-17.8261	-12.692	-26.2365	-25.9377	0	23.3597	-18.1865	-25.7649	-24.072	-19.9155	-25.369	-14.1744	0	0	0
BlackMaleElderly.png	-23.9882	0	-18.6345	-21.8239	0	-27.825	-18.3307	-28.6143	-36.8767	-26.7174	-23.5035	-17.3645	-32.8837	-21.7671	-16.8186	-14.7597	-20.2335	-44.1848	0	-10.6941	0	-35.0244	-24.0886	-12.673	0	-25.9397	-19.3879	-21.4745	0	-21.4783	-35.2254	0	-27.1617	-17.7834	0	0	-25.1625	-27.795	0	0	0	-19.0854	-21.8806	-21.357	-19.3276	0	0	0	0
BlackMaleMiddleAged.png	-20.5523	0	-13.5431	0	0	0	0	-21.1626	-22.1868	-16.8982	-17.2911	0	-12.6883	-15.3813	-12.1986	-14.2434	-10.7286	0	0	0	0	-21.1188	-13.3908	-15.0743	26.1285	-19.7071	-17.995	0	0	-13.2765	-10.2691	33.5332	-11.5093	0	0	0	-18.5104	0	16.9942	24.6664	0	-13.5317	0	0	0	0	0	0	0
BlackMaleYoungAdult.png	0	0	0	0	-12.0489	-13.1014	0	-14.1823	-36.4329	-21.7005	-13.2878	-12.257	-20.4361	0	-17.8399	-13.6173	0	0	0	0	0	-23.0832	-29.1965	-13.0432	12.9777	-30.7103	-18.6663	-14.5813	0	-14.3572	-22.0278	0	-14.9068	-13.3079	-14.1875	0	-21.1485	0	0	0	0	-23.2531	-15.3164	0	-18.9381	0	0	0	10.6374
WhiteFemaleElderly.png	0	0	-30.849	-14.8897	-28.9922	-32.4718	-23.4823	-36.1996	-49.2425	-46.4657	-39.0525	-33.8773	-40.0309	-31.347	-28.2274	-29.7275	-32.3837	-57.1848	-23.1299	0	-21.2012	-45.2705	-48.7741	-29.1901	-10.9562	0	-29.3411	-33.5015	-21.9357	-36.2648	-37.9766	-22.6868	-41.0752	-30.6892	-32.7098	-24.0346	-33.4842	-30.8474	0	21.7696	-21.738	-31.2065	-35.9298	-18.4234	-30.1896	-26.7617	0	-22.6869	-20.7096
WhiteFemaleMiddleAged.png	-58.8938	0	-23.6758	0	-15.8874	-30.6768	-17.1207	-28.6169	-37.3623	-33.6709	-35.6661	-30.6079	-28.0726	-21.0596	-22.3846	-22.6882	-34.3316	-57.4066	-20.0869	-39.7829	-11.8817	-32.1842	-25.3696	0	0	-41.076	-38.862	-35.3556	0	-28.003	-16.7759	0	-31.9624	-17.8952	0	0	-27.3033	-24.9465	0	14.6485	0	-27.1982	-28.8783	-24.6554	-35.8446	-11.7389	-47.7284	0	0
WhiteFemaleYoungAdult.png	-68.4674	-20.5614	-41.9645	-18.6259	-36.2389	-51.9733	-44.1093	-45.197	-53.0593	-42.0044	-42.8879	-38.7981	-46.9654	-51.6526	-39.0932	-28.9931	-56.8225	-58.0339	-35.8534	-26.2409	-34.8946	-54.4592	-45.2954	-36.6258	-30.4028	-40.526	-38.7826	-36.0308	-31.6048	-44.6535	-40.8975	-19.5924	-60.0241	-47.6335	-33.8974	-28.0258	-45.7769	-50.0559	-15.3743	-13.9108	-38.4348	-50.3935	-42.0662	-37.5704	-39.9296	-46.6018	-15.6462	-17.556	-22.4741
WhiteMaleElderly.png	0	0	37.104	25.7181	28.5448	0	14.5738	0	0	0	13.9484	0	0	0	0	14.7709	11.6495	0	0	0	32.1229	0	0	0	27.384	23.067	0	21.1862	21.0544	10.4481	0	60.417	0	38.9918	0	29.9456	0	0	48.3107	75.2746	28.2283	0	0	19.8615	0	17.7106	59.6997	0	35.6151
WhiteMaleMiddleAged.png	0	11.295	0	-36.011	0	-17.5784	-14.8925	-21.7562	-26.7345	-22.3323	-10.8381	-14.2817	-19.8015	-15.7162	-15.782	0	-13.9661	-12.9601	0	33.8954	-13.4399	-26.4746	-17.4651	0	11.3815	0	-15.3264	-14.3528	0	-16.3107	-14.6162	15.0844	-33.5298	-13.711	0	0	-22.6647	-17.6412	0	0	-16.8017	-20.9301	-15.6063	0	-16.2989	-12.5349	12.2582	16.4967	0
WhiteMaleYoungAdult.png	0	-13.517	-29.2687	-33.4157	-47.1957	-45.1776	-35.8928	-43.8522	-68.9713	-54.8298	-47.3624	-39.4131	-49.8866	-54.174	-37.8645	-35.9949	-48.8687	-34.6152	-36.027	19.2921	-28.1719	-54.3943	-58.9156	-44.4532	-20.9284	-39.5653	-55.218	-37.2355	-32.296	-34.6427	-49.9606	-21.3551	-44.3153	-38.9675	-42.6542	-35.1297	-53.4687	-55.6098	-18.5709	0	-56.4445	-40.0418	-51.8594	-47.2778	-56.6214	-35.8273	0	-23.1843	-23.3569
变浅count	0	11.295	37.104	41.3427	28.5448	0	14.5738	0	0	0	13.9484	0	0	0	0	14.7709	11.6495	0	18.6078	67.2064	32.1229	0	0	0	129.496	35.6053	0	21.1862	31.3522	10.4481	0	191.876	0	38.9918	15.1896	58.4165	0	0	110.03	236.021	28.2283	0	0	19.8615	0	17.7106	122.293	39.1097	60.1573
变深count	-360.679	-144.037	-313.804	-235.28	-267.423	-355.895	-278.725	-457.806	-698.989	-511.936	-424.425	-379.67	-520.278	-431.873	-346.049	-310.672	-374.756	-567.123	-214.8	-190.482	-246.789	-580.868	-588.57	-318.582	-92.3814	-351.361	-402.289	-363.451	-184.483	-397.5	-432.012	-88.9985	-487.649	-317.285	-267.302	-147.557	-478.437	-405.421	-55.2404	-56.0184	-253.927	-407.07	-443.964	-348.473	-448.223	-248.435	-117.757	-104.072	-117.943
	alcohol	art collection	backpack	basin	beer	biscuit	book	bowl	cigar	cigarette	cleaner	clothesHorse	coffee	cooker	cup	desktop	dress	drug	earphone	gun	handbag	kettle	lamp	lighter	makeup	mansion	mop	necklace	necktie	oven	pen	pencil	perfume	pill	pillow	plastic bag	pot	potatoChips	power bank	private jet	purse	razor	scissors	soap	soccer	suit	supercar	tissue	toothbrush
	18.8031	3.48629	-2.66104	-2.61235		10.1875	-20.573	4.88116	-5.2444	1.18621	-2.94781	16.5933	6.57099	3.50287	-2.95463		-32.0486	29.1882	-10.9481	21.0236	26.8928	36.1035	-3.24462	8.58133	9.8487	-3.16301	3.40074	-10.7378		2.90986	19.96	22.0392	-8.97457	33.6973	27.8328	37.0858	13.9654	-6.52528	-22.4372	6.66231	3.63027	22.6621	-25.1696	10.6406	3.9904	-28.0129	-10.8849		3.95503
	2.79434	-8.14029	-12.7659	-4.45337	-16.7756	2.75494	-11.6748	16.8655	4.18245	-6.00302	-26.4365	27.6339	3.07046	-8.57464	-3.32875	14.1441	-9.67639	22.8525	20.4401	-7.80202		-16.1254	-1.96868	-3.84403	7.95198	-2.24552	11.872	-20.7513	-22.6497	3.86204	14.3535	4.2653	21.0729	7.32172	13.3468	14.55	-3.3636	-8.38388	-12.8294	-6.2481	7.43733	22.0152	-12.7768	10.8675	10.2591	-23.8094	20.2672	21.0347	3.04904
	54.5273	38.8843	39.1167	28.8793	48.5508	45.8345	30.3256	37.3457	25.7783	41.0584	18.9675	50.9906	36.5392	56.7671	36.3951	46.4724	43.4633	40.5186	32.3921	18.59	49.9129	35.6146	46.7477	37.175	42.2113	42.3012	38.7629	54.2389	38.0895	29.0361	52.2356	48.7692	53.3858	53.4544	45.4815	47.1484	46.5455		28.5736	31.1468	46.3063	65.9647	32.17	55.273	55.1329	30.9691	45.3147	43.8308	27.2496
	6.40908	-15.0819	-4.69211	-13.1615	-20.4194	4.64917	-20.0062	-5.99363	-8.90252	-3.40141	-30.4301	1.28701	-9.39584	0.782475	-14.4987	-1.6115	-14.6856	7.30943	9.39475	-21.383	14.9357	-7.71817	-14.5978	-7.44939	-14.7267	-19.3002	1.77363	-32.7884	-13.4367	-2.79361	-13.2633	-10.9454	11.9608	6.11703	-7.6975	-8.28846	-17.8778	-12.0748	-21.2536	2.47756	-3.10296	-1.57876	-15.7071	0.862707	3.56099	-36.6711	3.16602	6.81055	-10.1012
	15.8645	-22.6262	-2.77498	-7.17044	-11.0367	13.3416	-4.7332	26.9827	8.64976	-1.60018	-28.1335	-58.0758	25.9923		-6.35664	10.7177	-29.9392	27.4155	1.0242	1.07399	13.4925	17.6479	-1.65933		10.6963	-30.3044	3.10257	-9.45383	0.577351	9.33447	30.0199	5.06014	27.5753	21.3086	-0.688054		-15.8181		8.48503	7.96564	1.97665	15.5051	20.8596	16.1822	-0.805017	-13.567	5.89503		-25.6753
	-4.13138	-13.8064		-20.3556	0.133102	-9.99544	-11.2785	4.50115	-12.9349	-6.37727	-36.0781	2.26996	-3.37829		-2.74162		-35.8375	26.5061	3.80098	-16.7023	17.1335	-5.79492		-10.0896	11.8187	-24.6821	-11.7043	-22.3358	-23.3974	-7.41724	29.3671	3.32989	24.6347	-3.93422	2.0036		-13.0226		11.2114	4.56896	-13.2965	2.31022	-22.2018	6.88422	19.861	-15.3059	-9.76614	12.7674	-12.7208
	13.6934	19.6762		18.5545	31.7106	45.0169	25.6264	32.1597	17.5252		11.3211	34.2434	29.7407	-17.2938	18.1813		16.5058	9.32875	22.7297	4.74396	60.6358	36.9084	2.90165		35.9702			24.7754	18.7241	11.5884	25.7913	14.6226	18.8154	55.1072	21.9439	30.2765			26.292	16.682	36.1238	34.0399	13.9133	25.9432	50.6351	-33.6246	38.4432		31.3251
	-5.60314	-9.41785	-4.43834	-11.3379	-5.43195	-6.1105	-0.265736	2.84442	5.23891	7.1825	-17.6185	-4.14142	-1.261	-18.285	10.3787	13.1072	-8.51066	22.2419	-0.712872	-11.2422	7.93542	10.7881	-14.2625	-1.21462	3.74782	-15.9722	18.144	-6.95818	-14.8932	-4.53544	15.8438	4.94428	31.1842	-2.45595	2.15645	5.3582	-1.18215	-12.2399	-11.5611	9.97518	-5.75805	6.4191	-16.9055	8.20926	1.36631	-13.8359	-10.1865	11.3628	-10.6326
	12.3585	0.979102	8.2747	-1.43686	-0.179706	-1.63653	7.39218	14.8441	4.18101	-6.74001	-23.4054	22.1329	1.63329	4.48328	-5.69821	11.3537	-10.259	4.71772	14.8038	-9.02085	16.7222	20.8652	-2.37551	-1.53719	10.4955	11.8587	17.1381	12.6612	10.6163	-2.8657	22.5851	9.14733	16.3885	20.0454	9.85932	27.7337	4.22975	5.79541	3.20398	6.42614	4.02039	6.9424	-3.18004	22.2892	25.5653	-9.16055	-8.10559	16.2601	-1.08446
	17.5149	-6.79874	-1.46372	-1.74067	19.0363	2.49904	-7.28232	14.3996	-0.492634	-6.61637	-10.7167	19.3827	3.96983	11.6581	9.4497	9.08436	-17.7056	23.7134	5.77048	0.490421	42.55	16.4529	-19.6526	-4.31073	7.16238	-0.193457	16.8028	-8.25124	-7.66509	10.4471	5.32975	2.52407	22.2262	23.6849	-8.75873	15.6692	-8.27408	15.0304	-14.9192	5.96879	2.15882	12.1513	-10.6384	22.7608	14.2433	-14.6577	12.5672	17.0964	-7.29917
	8.26052	-2.2221	4.46836	-18.1682	15.4331	7.10184	-3.26699	13.1801	-6.67181	-6.82256	-11.7433	15.0576	-6.14997		4.72025	5.76314	-14.4257	20.4715	7.18041	-5.19543	13.3213	19.6109	-8.09088	9.0994	25.734	-7.4739	25.5332	-7.59247	-6.97179	-0.0149287	18.8317	0.110946	23.8613	8.48446	4.42451		-3.35906	-1.43579	-15.1751	8.34449	0.288408	8.80872	-7.58604	12.898	23.7531	-7.93776	7.93685	6.5099	-8.68591
	10.6708	6.65473	-6.26226	-28.2558	-1.12654	3.2867	-3.92405	-0.193547	-7.9284	-7.28521	-28.0852	18.5306	-1.33173	-24.7175	-5.69653	6.0222	-15.7305	2.8858	3.68501	-18.602	47.199	16.2304	-22.4856	-1.40897	-13.5205	-2.59861	25.4096	-10.3601	-11.5196	3.99183	7.82648	2.94743	9.99178	3.45363	-2.89903		-8.40412	-5.386	-13.1146	9.54443	-10.0122	-4.20775	-15.4572	6.30401	4.51703	-11.3264	3.23555	15.0087	-18.3666
	16.6765	4.58404			13.6552	9.19255	-0.949809	10.7531	6.17186	-7.05216	-24.4463	-9.98806	-12.9092	2.82328	13.0105		-20.7754	31.9193	3.0295	-6.02283		-12.4155	-14.4422	-4.51089	5.7399	2.48131	-0.488532	2.81606	7.69772	11.016	11.4374	-7.67456	23.7935	14.5961	0.602692	18.1347	-13.3909	12.7492	-22.1064	15.4123	-3.24896	-4.76436	-16.575	10.3472	-15.9908	-13.8054	-3.01886	20.4336	2.119
	15.8808	-1.34381	-3.11939	3.99269	-29.0771	1.17299		10.8564	11.4271	-25.285	-14.0816	15.698	7.19608	9.94834	13.5885	10.0319	-4.59685	31.3454	17.4684	12.3544		-7.08026	8.10595	8.45491	14.4525	5.3143	14.6341	22.906	8.94099	2.25186	22.8447	11.2736	4.68422	5.0143	1.98863	13.7994	-19.4416	-3.11968	-2.35665	-28.3256	12.5819	11.845	-8.94688	22.8612	2.58925	-8.41262	7.47503	21.9341	2.62679
	13.6977	-20.7961	-1.92442	-3.95434	-13.8241	4.7426	1.24244	-2.18202	6.21102	-29.5633	-30.8478	7.40052	-22.7858	7.98138	1.74262	-4.97147	-13.0588	-10.6879	7.30692	-1.74927	8.30104	-16.0881	-33.9935	-2.64437	-1.6095	-15.7472	5.93773	4.07052	-1.32802	-28.6337	8.89019	-21.3838	-8.83833	8.32893	1.1702	16.9107	-6.02085		-19.5554	-2.72639	16.411	7.6285	-17.7105	12.0953	-5.44099	-15.2644	-9.9298	1.38127	-9.63129
		33.8		55.6681						30.3319	48.7385	60.2036	51.346	23.8476	54.7442	79.6033	51.7113	60.9935	77.8966			45.5062	48.1248		63.5131	54.7817	65.2723	55.2714	36.0911	64.9249		60.6858			77.5381	63.9977			46.5082	66.4954	69.827	85.756	59.0257	80.6858	62.52	58.85	78.2949	81.487	16.5111
	24.6697	35.4686		16.743	23.2139	31.4315	8.77383	37.3507	32.8417	31.3751	13.1642	44.7094	23.9054	40.0322	35.9715	26.9874	7.04893	48.3464	46.3186	36.2197	47.978	27.3702	10.8597	29.6692	37.9839	31.5413	42.0795	21.8198	19.8946	45.6333	34.3152	34.4391	48.5405	35.7324	32.4752	38.9561	31.1091	17.9668	17.6654	30.9372	24.2192	40.3392	15.8732	42.2153	36.3648	9.32559	41.1341	44.7409	38.5874
	5.92006	4.39611	-9.12382	-13.6765	3.29522	7.40098	-3.97626	15.1785		-2.61635	-25.9746	6.46709	-1.81576	6.59659	8.50434	10.5398	-14.3732	7.60238	7.41211	-1.50594		2.27556	-5.64669	-1.22315	3.85542	-6.88694	23.6119	-1.99456	-1.19403	7.46791	8.69731	9.51583	21.5604	10.9719	6.44598		-11.1642	-19.7444	-16.4014	7.1651	-2.95592	15.3285	-3.12098	6.28068	13.2704	-15.1805	-3.60149	22.2905	-15.8455
	0.633352	0.132488	0.00731584	-0.00690504	0.15877	0.47464	-0.0404735	0.649372	0.222313	0.00492047	-0.607651	0.751098	0.363713	0.276534	0.459477	0.659012	-0.341371	1.12963	0.747202	-0.0131388	1.01947	0.611532	-0.0713336	0.152075	0.725903	0.0547528	0.836895	0.187043	0.104378	0.433898	0.875182	0.537975	0.949618	0.835911	0.631185	0.892589	-0.0707478	-0.0482437	-0.0826957	0.534645	0.518351	0.964347	-0.0948167	1.03778	0.848312	-0.44841	0.578435	0.952636	0.014945
	alcohol	art collection	backpack	basin	beer	biscuit	book	bowl	cigar	cigarette	cleaner	clothesHorse	coffee	cooker	cup	desktop	dress	drug	earphone	gun	handbag	kettle	lamp	lighter	makeup	mansion	mop	necklace	necktie	oven	pen	pencil	perfume	pill	pillow	plastic bag	pot	potatoChips	power bank	private jet	purse	razor	scissors	soap	soccer	suit	supercar	tissue	toothbrush
	-19.0525	-28.7844		-11.4439	-19.6259		-13.853	1.36585	-10.5022	-16.3852	7.28042	-7.03366		-5.69517	-12.8503	9.13171	-24.8479	-26.8834	-34.277	-41.6995	-10.0741	6.03208	-3.10196			-31.0302	-2.04642	-43.8844		-13.6761			2.44614	-3.5012		-30.9936	-23.8225	-15.7012		-17.6125			-19.8611	-3.77952	4.81597		-29.5218
	-23.1453	-47.4244		-17.372	-51.7876	-60.3728		-25.3859	-60.242	-31.8101	-14.1292	-50.4725	-9.94083	-18.5303	-50.3465	-19.9456		-19.3226		-30.3545		-38.6752	-45.2351	-55.8054		-32.5617	-57.8365	-12.581		-21.3678	-19.4147			-16.0082	-38.3777	-65.2875	-41.6077			-44.8431		-6.85791		-53.258	-39.7993	-24.9232	-43.2647		4.2975
	-4.54414	-10.1609	42.6416	29.0337		14.5853	4.83045	49.7467	-38.2414	-15.2351	13.6122		-36.9811	6.49245	9.66438	16.2515	33.6828	10.6086	-20.8514	-4.61893	13.9777	-9.82304	22.008	12.5209	36.7816	0.786951	-7.46921	-15.0123	-3.28742	41.9202	29.8926	21.6231	35.3021	33.9517			18.5134	21.1969		-5.77804		32.3219	14.7462	-19.9385	-5.25249	4.84634	-17.6451		37.3357
	-50.3926	-44.824	-17.9441	-40.6432	-55.9844	-35.2628	-32.4804	-36.229				-42.1726	0.772718	-40.7441	-5.28154	-28.2433	-35.2872	-51.2524	-10.9047	-49.9049		-26.4684	-32.9972	-29.0915		-54.2662	-24.6079		-19.7516	-55.1414	-25.9113		-9.71315	-23.9177		-68.2279	-54.7461			-45.3809				-30.4657	-13.6004	-13.9346	-55.0307		-9.13595
	-29.2633	-16.5605		-34.0554	-35.9431		-18.6126	-17.0027	-12.9834		-3.34305			-26.0038	-35.0379	5.66833	-7.85786	-32.9514	18.7754	-29.8376		-7.34646	-5.16468	-42.2178		-21.5316	-26.6753	-28.6717	3.38789	-47.791	-34.4101	-48.6228	-2.69092	-10.4893	-39.5994		-9.07061		-4.64347	-18.3175				-36.6396	3.57569	6.87315	-20.281		3.27458
	-22.9612	-24.828		-16.8041	-25.3678	-3.39008	-22.6012	3.10438	-14.6291	-31.2759	-19.2083	-19.0181	-47.3825	-31.5037	-5.51116	11.0642	-9.23653	-24.7625		-35.5381					-9.05748	-30.0437				2.90117	-34.6603		-20.6125			-37.594	-17.186	-27.5756		-24.1926				2.12575	12.0557	-2.56546	-13.6773
	-6.97598	-17.9845			2.36631		-6.90527	12.9096	-12.1061	-8.39584	30.1893			35.0416		6.24537		-8.05091	25.8371	-24.0179		-21.3989		-4.20177	36.351	-28.391	-23.959			31.8943	-10.2814			14.3912	11.023		15.2714			-16.1651				8.03096	-21.1078	-15.8613	-19.0639
	-9.12028	-4.4295	-18.8894	-2.79717	-12.8646		-16.0901	-16.7092	-10.0647	-7.14783			9.03231	-22.1969	-6.70558	27.426	-6.60909	-13.6648	-19.0772	-14.824	-23.1387	-4.52753	-17.165	-16.199	-5.96812	-7.17591	-11.9535	4.7308	-10.9674	-8.77358	-8.48321	-3.89143	1.11914	-6.7841	-9.27213	-5.98577	-9.27371	-1.93765	-3.05493	2.6986		-20.7956	1.39884	-6.84002	-2.45204	4.8216	-14.1544	-30.2678	5.2101
	-30.2163	-30.7752		-9.0802	-11.3606	-32.9838	-20.1657	0.115984	-25.2959	-3.45441	-8.3174		-3.5457	-26.0796	-15.0742	3.82085	-29.9045	-27.2064	8.46043	-22.5179	-33.5492	-28.2389		2.2118	23.7528	-29.4232		-22.6267	-27.0919	13.6239	-18.7016	-12.1009	-29.1487	-25.1306		-20.1627	-3.41951			-29.7713	-38.6883	13.653	-35.4087	-14.4391	-0.107693	-5.03613	-45.9171		7.11278
	-28.3775	-22.0909	-1.49179	-10.0383	-16.6442	-34.4934	-11.4208	-25.9035	-37.6256	-23.7175	-14.392	-15.9504	-4.8667	-15.2283	-13.1698	24.8492	-33.1887	-23.7144	1.03534	-23.186	1.61248	-23.1716	-29.9147	-29.8885	-0.527163	-21.6308	-16.433			-19.5105	-46.7363	-37.2385	-2.45464	12.5316	-26.5077	-23.2367	-17.1403	-14.028		-17.8612		-18.0214	-41.3863	-19.2451	-11.3962	-8.03597	-26.9058		-0.570467
	-13.6336	-6.63155	-15.3799	3.69979	14.8023	-9.68537	-9.02069	-8.78042	-15.3088	6.57311	-1.5225		-9.63752	-11.1634	-12.3855	30.9272	-14.0448	-15.4326	-7.75998	-15.2033	-15.7186	-8.28182	-16.0565	-3.41482	-1.89959	-14.4006	6.1223	-8.81813	-3.56292	-6.3032	1.3238	-26.4163	0.0499961	8.20324		-21.1499	-1.32936	-0.667569	14.6979	-13.7444	0.131195	10.983		-4.69302	16.8472	-3.05168	-14.6602		21.5954
	-22.0384	-10.8973	-20.545	-0.0864485	-5.61964	-23.9138					-7.10892		23.4643	-25.2058	8.85628	20.1059	-4.51242	-15.2932	4.88338	-31.1246	-48.5722	-8.5157	-12.4786	-16.6982	-0.870856	-20.5793	-4.80202			9.10272	-23.502		20.2048	-12.1632		4.11144	4.97306	-7.5088	7.90331	-13.1324				-10.635	28.8901	24.2257	-23.4186		22.0241
	-30.3763	-37.8021			-52.9896	0.842383	-43.2652		-12.4571	-28.5547	-4.13105				-23.3479	-1.53355		-39.1374	13.0547	-29.9779		-18.7755				-47.8399	-23.3039	-11.602		-4.94367		-23.0776	-34.7666		-35.1143		-26.2288			-28.8073		-23.1338			-23.8666		-37.4168		-16.2293
	-28.6463	-25.4886	-22.1081	-29.4586	-27.556		-49.1751	-10.4285	-46.6009	-24.5862	-9.95304	-27.2192	-30.6714	-33.3592	-39.7102	-3.27165	-21.1506	-20.686	9.81991	-2.42356	-63.7935	-8.07402	-42.9309	-32.9385	3.82617	-17.9717		-36.6278	-47.527	-17.6352	-36.7404	-27.4459	-36.0034	-14.089	-22.6898		-38.0489	-33.624		-19.5113		-4.82031	-31.0111	-18.3663	-28.3109	-7.52884	-39.9737		4.20332
	-46.931	-59.2231	-24.7997	-36.2522	1.04372	-21.0552	-25.5234	-11.9438	-68.5093	-14.687	-17.6701		3.4481	-53.0369	-8.39131	-6.72828	-18.5498	-31.3939	-0.601405	-46.7878	-32.3404	-24.1007		-0.336703	-5.32378	-58.3317	-20.237		-44.966	8.67572	-34.8003	-17.4366	6.26915	-10.2065			-8.56641	4.21933	8.55123	-47.1289		-29.8057		-19.1464	-12.5768	-10.8808	-73.3458	-30.1237	-1.79285
	5.30392	14.0686	61.0792		30.6498		52.2373	16.6633	-8.86057	7.96167	30.4096		35.3745	43.2076	10.2026	2.04368	58.0931	12.938	66.8094	3.78441	-9.72214	20.971			65.2147	5.6902	17.51	-2.2304	26.8555	23.7474			6.43036	31.6705			47.0099			7.16118	72.8872	40.2551	10.093	32.4762	39.5193	47.8206	-15.6418	43.236
	-11.7301	-8.64787	6.3995	25.4842	33.6059		29.7085	16.071	5.40929		21.1465			15.0583	-1.58239	29.2855		-13.4356	28.5786	-12.152		14.8567	16.1476	14.9507	12.6842	-14.7972	19.3883	-6.18477		24.9549	-3.49655	1.29746	15.0463			-16.4966	13.3247	-9.43933	5.09807	-16.4192	20.9573	15.8186	15.1835	11.1966	30.7447	21.3656	-24.5704		42.0863
	-46.9169	-49.5646	-10.0131	-13.8591	-9.41686	-15.7208		-39.6463	-44.8207	-27.0525	-1.99215		-6.11766		-3.65604	-11.7036	-6.18288	-40.6895	-16.4092	-47.9617		9.01014		-3.79951	-4.31864	-53.3052			3.91054	-6.71161	-15.4914		-27.3256	-2.00822		-26.8752	-18.2487	7.37633		-49.4314		-10.7619		-3.09543	-17.8925	-3.80157	-51.2915	-13.0531	3.10065
	-1.16394	-1.20014	-0.0584741	-0.454647	-0.674145	-0.61514	-0.506492	-0.255701	-1.14677	-0.60491	0.00241756	-0.449629	-0.214032	-0.580409	-0.567575	0.320537	-0.332212	-1.05647	0.187149	-1.27318	-0.614774	-0.490355	-0.463581	-0.569189	0.418458	-1.32445	-0.489732	-0.509746	-0.341668	-0.125094	-0.781703	-0.481415	-0.210687	-0.0654157	-0.445939	-0.866385	-0.471101	-0.215804	0.0793115	-1.10621	0.153576	-0.00323651	-0.239571	-0.518645	-0.110872	0.0398152	-1.57161	-0.0839126	0.340311
	alcohol	art collection	backpack	basin	beer	biscuit	book	bowl	cigar	cigarette	cleaner	clothesHorse	coffee	cooker	cup	desktop	dress	drug	earphone	gun	handbag	kettle	lamp	lighter	makeup	mansion	mop	necklace	necktie	oven	pen	pencil	perfume	pill	pillow	plastic bag	pot	potatoChips	power bank	private jet	purse	razor	scissors	soap	soccer	suit	supercar	tissue	toothbrush
	13.8027	-15.5866		-16.6255	12.5326	-15.4614	-24.272	18.1609	-34.8653	8.83588	-8.67514	-23.6796	14.2844	-23.6865	-21.4041	-16.3444		-30.3848	-22.2346	-41.8719	-0.60841	6.10348	-28.0619	-11.6236	10.2366	-11.1373		-6.23209		-20.328	-6.54154	-25.8795	-26.059	-26.991	-3.10749	-31.3825	-19.0832	-6.23015	4.89965	-35.3867		-0.759125	1.37568	13.2679	-6.41941	1.77507	-7.29794	8.22739	-12.9051
	-11.0567	13.1899	-1.81123	-18.5642	8.01979	-11.862	-7.15204	-8.58677	-6.81557	-27.8603	7.3291	-11.1471	13.4138	-7.59882	-2.26102	-11.2451			-6.97061	-16.9964	-4.36711	-29.6463		-35.2445	-1.87817	11.6241		-7.64735	-9.62923	-13.5074	-19.1501	14.6303	-4.91775	1.5606	12.717	-4.42067	-34.9956	-16.4655	-10.7471	-0.899325	2.55607	-3.88315	19.8053	4.4346	7.56691	-13.1745	23.7043	-3.61568	3.81666
	1.67077	32.9902			24.8805	41.294	42.632		-15.8619	35.8823	37.7423	39.8381	32.7228	32.9485	27.0324	40.504		41.0273	37.5806	12.9111	48.7946		36.4444	42.8386	43.5379	35.5311	51.9493	51.4283		49.2879	52.4182		39.3054	49.2382	40.1614	49.3226	42.264		47.4349	42.5303	11.3271	8.02016	45.5739	43.5253	37.8272	42.2669	66.7816	39.9863	47.346
	-10.9188	-19.2774		9.34101		9.2645	-9.26859	-14.0388	-14.7676	-6.00651	-6.63928	-9.15592	-28.0259	-5.13643		4.14462		-14.4652	6.00646	-18.1463	11.6822			-11.5476	-0.453422		-17.7914	-6.78873	-8.08844	12.5564	-2.27133		-17.3212	-5.55821	4.55273	7.79477	-11.4529			-22.0038			12.609	-11.8357	-6.68827	-16.1556		19.0079	-7.4175
	-26.9314	10.016	8.089	-2.13986	-5.83045		-25.1789	-18.9111		-50.5549	2.95529	-1.83817	-13.7563	19.6567		5.85209	18.5978	7.59106	-22.2296	-48.3778	-33.2852	-38.1693		-6.49217	4.43457	-2.60909		-6.9806	-32.9557		-3.93972			-42.476	-9.97286	-51.3482	-7.98924	-58.1795	7.98458	-14.7831	-11.2299	-14.979	-6.70675	13.006	-27.5878	-10.317	-21.9514	-22.7531	-2.95739
	-0.32076	9.54761		3.86578	15.5857	10.7403	1.15958		-20.0613	7.90155	29.3945	12.4078	12.2597		-0.0875709	7.27946	49.0251	-1.44795	21.4677	-13.0478	6.67182	-17.122		2.83587	31.4215	-42.0471	12.8902		20.8864	7.49167	-33.1552	17.5801	2.61179	25.3432		-9.78583	10.421		9.22002		2.56331	5.93364	-6.42227	11.7635	-2.38905	-10.8508	-19.6562	4.43586	7.01063
	21.6236	1.65312					27.3589		28.3771				14.2335		27.1057			8.74356	54.3888	26.0146					51.6268			46.8466			16.3378		26.0895	39.6196				27.7749				21.207	33.052		4.54038			15.4976	23.9616
	10.4877			41.1502	23.3763	11.1027	18.0496	25.6024	2.36693	-11.4486	-2.84344		16.1681		-2.12131	17.0933		23.9185	15.8815	0.253726	34.9156			6.60791	49.4109	1.97201		-19.5158	5.15968	16.7912	26.2575	28.1199	20.9669	28.2772	7.55896	-0.207966		3.16685	40.732	14.7105	-0.191279	-24.0024	26.5783		14.1972	24.2343	12.1714		18.9594
	-14.7337	-12.3315	15.0311	11.9453	-7.61704	-17.3398	-7.54037	-24.5738	-26.5504	8.87925	12.2108	-9.43573	6.27817		-10.0126	-5.55404	10.4878	-16.4661	-1.1161	-16.1659	12.6762	0.538748	-10.3278	-0.780405	5.90337	3.08379	1.319	1.10498	5.60371	0.267787	-10.389		7.38334	-3.29395	8.96708	-3.12117	-14.9474	-13.4719	-3.28364	-7.50543	-8.25122	-6.75298	15.3301	1.04539	13.8357			5.9241	-12.457
	24.6586	-2.07207		39.4051	-1.34185	8.45677	23.3508	23.7283	11.6916	4.85759	31.1452	1.49151	-18.4256	28.1471	20.7226	26.5		3.88434	8.64013	24.1559	16.0707	22.2485	6.37635	33.5745	25.9541	-6.23843		-12.3806	25.4132	37.5958	-0.6127	15.828	21.061	27.6771	-0.66864	13.4709	7.6008	13.5095	20.3751	7.95191	12.3225	18.6175	0.297967	37.3716	-13.9553			21.0337	19.8768
	5.13467	9.11346	30.8782	28.1554	-0.771119	23.4485	-13.4834	47.1905	-5.93323	23.1577	30.4789	20.3787	8.61444	4.69649	16.9774	1.61083	76.0185	5.9122	5.37298	4.2153	26.0224	33.4847	47.6614	14.1537	28.2879	28.5297	32.7813	15.4732	41.8447	21.1111	7.38359	6.27045	43.1378	19.8298	28.0152	12.1365			1.93641	18.8041	0.351463	20.2526	21.91	60.601	-0.363919	6.30397	-3.91261	22.8828	-0.0977262
	-7.1056	10.7568		42.5397	24.883	-9.55207			4.4616	-10.0652	60.7817					31.9569		-8.80361	-15.1323	14.4738	14.7967	-1.10222			23.6715	50.5858		2.31738					23.2576			-9.11171	32.3209	-31.6476	21.9817	3.30974	48.7521	15.6573		11.2788	4.60295			-16.1801	23.4832
		4.71836	15.5353			-25.8825	9.46325		-22.687	10.219		14.1231	2.65351		6.54836	7.64471		-25.1254	0.255675	-24.6842					-0.374519	6.39964		0.747242		5.82275			-6.38908	-11.121	-13.4963			-8.59448		5.03947		-14.4104			-22.2507			16.6121	-1.76577
	-20.5902	-5.78511	13.2051	18.1939	6.65518	19.3115	9.52675			9.04301	18.04	-21.5941	1.01921		-11.8542	14.9547		-23.8547	7.30019	-25.8552	-0.309834	16.0627		-17.1552	-3.37963	-20.4767	-4.00596	12.951			-10.7423	-12.4717	-24.1817	2.98697	4.0873	3.96426		8.04705	-22.4389	9.55653	-22.75	-21.8939	-18.1773	1.61521	-34.5636	-7.17134	-17.0342	-0.0548921	3.43536
	-43.0788	-19.9424	-2.56133	-21.3381	-4.35158	-25.7451	-2.37071	-13.2496	-8.99583	-19.7349	5.46168	-8.63153	-0.657789	-20.3606	-9.4454	-5.33796	-1.23371	-8.34768	-4.20481	-28.7074	-20.7227	-17.2121	-8.95798	-1.9178	6.46661	11.4599	-6.25081	-12.5378	-33.9367		-7.43573	-19.7981	-8.77774	-24.4176	5.54025	-9.50211	-14.8077	-6.76572	-12.223	-0.407024	-26.9671		-1.40178	0.233977	-24.4807	-19.7316	0.696905	-12.4189	-3.38472
	53.8165	53.3855					22.5255			17.2081	6.3867				48.9476	65.7486		26.7723						16.0605	62.229	53.1483		23.5159			11.7284		56.6593	66.388	31.0417			53.4389	53.9849	63.5359	27.8868	27.6953	22.0764		63.2048	-1.13853		32.0085	16.7123
	40.1892	41.708		59.324		26.0612	25.4269	28.1652	19.3485	20.2305	36.1704	35.1153		50.5773	28.872	30.5526	76.3254	23.2171	38.9009	24.328			27.6676	24.5467	72.0989	31.3379	42.2935	25.3129	14.2364	32.5276	34.3736	31.5259	61.2016	36.3926	42.9855	38.7931	36.7253	40.6435	51.5053	15.1875	79.0029	28.1401	54.5385	26.998	36.9961	55.5028	39.4949	59.3662	48.2083
	-16.5049	-6.11554	4.57087	15.3305	7.85418	-24.227	-7.52322	-8.2828		-0.0398559	0.882439	-7.92677	-23.215	6.97099	0.707837	-2.58706	5.04872	-17.1453	3.84387	8.93699	-3.50354	-0.627434	-5.13926	-26.2668	21.9227	8.58758	-2.32075	-4.80027	-8.42743	3.59726		-21.5009	11.5434	22.9622	3.05284	-20.5578	-16.3856	-22.8227	20.9212		-20.5961	-5.37408	11.3326	15.6419	6.26867	-26.1724	1.03324	1.43816	-2.19727
	0.0559528	0.294356	0.230381	0.584953	0.288542	0.0544708	0.229734	0.153346	-0.250813	0.0569565	0.724503	0.083182	0.104353	0.239485	0.332577	0.591037	0.650749	-0.0138175	0.354863	-0.329343	0.302315	-0.0706703	0.182397	0.0821939	1.19755	0.443753	0.307957	0.285595	0.0558517	0.425595	0.150726	0.0952899	0.626586	0.573383	0.44843	-0.0387659	0.0268618	-0.0488802	0.645231	0.276779	0.263268	0.148524	0.64381	0.635966	0.139836	0.0704757	0.205639	0.531661	0.471188
	alcohol	art collection	backpack	basin	beer	biscuit	book	bowl	cigar	cigarette	cleaner	clothesHorse	coffee	cooker	cup	desktop	dress	drug	earphone	gun	handbag	kettle	lamp	lighter	makeup	mansion	mop	necklace	necktie	oven	pen	pencil	perfume	pill	pillow	plastic bag	pot	potatoChips	power bank	private jet	purse	razor	scissors	soap	soccer	suit	supercar	tissue	toothbrush
	-17.3421		-16.1381	-4.5529	-8.2538	-15.7242	-21.2493	-26.3275	-42.2432	-29.6924	-23.544	-22.2742	-32.6214	-22.0067	-29.9367	-11.5629	-18.0792	-7.65648	-18.1567	-7.9519	-21.0443	-34.2198	-31.2137	-25.3738	0.56332		-25.8437	-25.0808	-10.5622	-18.9147	-9.85851	-2.23423	-35.9531	-24.7179	-4.98337	-4.30537	-27.7556	-9.00985	0.694065	-11.7188	-13.8936	-26.7188	-26.1583	-31.907	-37.1429	-10.8134	-16.7577	-2.93347	-0.86378
	-48.7409	-28.2681	-26.3507	-9.93499	-31.9297	-33.0387	-18.3539	-31.7809	-45.784	-33.4175	-35.6858	-37.9751	-34.8049	-31.3456	-25.6092	-24.3557	-32.7358	-55.6599	-14.2433	-35.302	-25.2858	-38.8626	-48.3268	-19.7074	-10.0405		-36.2599	-35.612	-13.2662	-35.7391	-42.1138	-7.33909	-38.3707	-17.8919	-30.344	-6.5236	-36.528	-35.9722	-5.73341	-18.0912	-23.7604	-28.7539	-28.2682	-26.793	-27.0823	-23.0389	-22.2193	-6.05176	-12.1885
	-25.615		-5.0908	15.6246	-6.62956	-17.7511	-13.4413	-15.1415	-28.1005	-2.85495	1.80006	-18.5879	-29.8019	-18.1176	-1.99092	-9.30513	-6.76253	-28.25	18.6078		-1.1062	-8.6395	-24.9511	-4.59943	19.82	12.5382	-6.6108	-6.54177	9.96369	-9.9383	6.56287	30.3782	-15.8949	9.89868	15.1896	28.4709	1.56734	-20.5528	15.1391	17.0808	3.28017	-7.8983	-9.84061	1.65015	-15.6061	-3.84196	50.3346	22.613	8.38056
		-26.2013	-40.7102	-44.3996	-34.7096	-25.0449	-26.9003	-53.6058	-78.7478	-56.7224	-53.3885	-46.0504	-53.5752	-53.8791	-37.4487	-35.7644	-45.4794	-57.5575	-35.4696	14.0189	-33.1908	-76.0045	-56.3472	-41.525	-20.0536	-51.6456		-43.8375	-31.102	-48.3372	-61.8908	-25.3643	-45.0467	-43.9839	-37.6302	-36.2856	-55.8234	-48.5979	-21.2952	-12.2976	-37.9198	-53.3456	-61.7583	-43.6996	-57.6336	-38.0773	-9.51791	-27.9161	-18.4134
		-21.7573	-15.2238	-12.9895	-18.5224	-2.55475	-25.8243	-36.8755	-42.2806	-40.3827	-32.0252	-33.144	-27.8488	-29.2038	-20.2432	-26.7272	-25.5014	-51.4993	-11.6438	-15.0471	-27.2871	-40.0647	-44.0796	-28.2784	1.2499	-42.3083	-35.6628	-32.9534	-14.366	-21.2356	-14.9923	12.5387	-33.7983	-21.1463	-28.7629	-11.3891	-43.1429	-35.4061	11.347	7.14457	-9.86629	-27.0963	-27.8635	-29.0148	-32.138	-16.1659	-6.66727	-12.7287	-20.8004
	-44.1702		-19.284	-19.5935	-22.3446	-27.6334	-9.36557	-26.2008	-42.899	-33.3698	-21.4264	-8.81923	-37.3471	-27.0933	-23.571	-11.4696	-13.5266	-12.5342	-9.88958	-51.5723	-15.6972	-34.5431	-45.8674	-20.0823	-5.2096	-36.0947	-31.5234	-16.6636	-14.7236	-26.5698	-30.2563	7.98502	-31.4949	-13.2672	-29.2899	-8.38561	-26.8013	-17.6161	-2.8477	18.7351	-16.6539	-19.7507	-28.1763	-21.0342	-36.101	-12.7002		3.99727	8.59508
			-12.3352	9.85985	-6.52031	-2.00929	-3.56475	-10.4524	-24.3845	-13.152	-7.78787	-9.56113	-14.9319	-12.4187	-4.55021	-12.1529	-4.1752	-44.7568	-3.13683		-0.218306	-19.1862	-16.7362	-1.00682	18.0836		-7.33312	-3.28745	9.07489	-8.08135	-21.8637	20.3504	-9.89232	-3.44559	-4.06711	3.05735	-6.89961	-5.97765	8.75462	30.0079	-9.86782	-5.14343	-22.2435		-9.26185	1.19418		9.2864	6.11542
	-15.2216	-6.9068	-7.41466	-12.2108	-6.84462	-2.59814	-5.62002	-8.46961	-24.9946	-13.2404	-7.76983	-0.495222	-19.6501	-5.51669	-7.48695	-8.5918	2.11129	-13.9621	-0.330363	-11.8422	0.564219	-11.3446	-25.6709	-10.7168	13.721	-23.7882	-12.5192	2.50411	10.2978	-14.8929	-13.8218	19.5739	-9.99007	-4.82814	-1.74449	5.6224	-14.6303	-14.4428	18.2392	10.478	-10.094	-7.46012	-13.8868	-26.8254	-8.47461	4.36019	-15.4056	8.55956	13.9048
	-37.688	-33.7318	-25.8264	-21.3208	-19.554	-17.899	-19.127	-17.8408	-38.6885	-27.3391	-28.4658	-35.0393	-18.9314	-26.7108	-19.0308	-28.6153	-22.0992	-38.518	-20.1896	-0.444425	-14.6946	-34.6336	-32.8813	-21.8386	-2.01503		-26.9005	-16.7713	-14.6269	-22.8236	-19.3248	-0.13708	-22.6055	-16.2899	-17.8261	-12.692	-26.2365	-25.9377	-4.97342	23.3597	-18.1865	-25.7649	-24.072	-19.9155	-25.369	-14.1744	2.43681	-7.05468	-2.91489
	-23.9882	-4.63679	-18.6345	-21.8239	-6.81787	-27.825	-18.3307	-28.6143	-36.8767	-26.7174	-23.5035	-17.3645	-32.8837	-21.7671	-16.8186	-14.7597	-20.2335	-44.1848	-9.62944	-10.6941	-6.15679	-35.0244	-24.0886	-12.673	2.9459	-25.9397	-19.3879	-21.4745	-0.688459	-21.4783	-35.2254	8.27438	-27.1617	-17.7834	-1.6899	3.60509	-25.1625	-27.795	8.86626	6.74956	-5.36636	-19.0854	-21.8806	-21.357	-19.3276	-6.15187	-1.27638	-2.01234	-1.0914
	-20.5523	-3.41905	-13.5431	-9.34056	-9.87378	-6.58479	-4.25572	-21.1626	-22.1868	-16.8982	-17.2911	-5.63528	-12.6883	-15.3813	-12.1986	-14.2434	-10.7286	-5.83128	-1.28666		-8.47907	-21.1188	-13.3908	-15.0743	26.1285	-19.7071	-17.995	-9.50477	6.67411	-13.2765	-10.2691	33.5332	-11.5093	-8.62784	0.00849748	0.506175	-18.5104	-9.68608	16.9942	24.6664	-7.87279	-13.5317	-6.63436	-4.71454	-9.61931	9.52601	-4.63475	4.45287	8.98421
			1.47437	-9.60592	-12.0489	-13.1014	-6.906	-14.1823	-36.4329	-21.7005	-13.2878	-12.257	-20.4361	-9.07769	-17.8399	-13.6173	-6.15185		-5.80117		-0.996253	-23.0832	-29.1965	-13.0432	12.9777	-30.7103	-18.6663	-14.5813	0.226852	-14.3572	-22.0278	7.26547	-14.9068	-13.3079	-14.1875	-3.51381	-21.1485	-4.94542	-0.136631	4.71709	-5.14197	-23.2531	-15.3164	-9.79288	-18.9381	2.06513		4.27212	10.6374
			-30.849	-14.8897	-28.9922	-32.4718	-23.4823	-36.1996	-49.2425	-46.4657	-39.0525	-33.8773	-40.0309	-31.347	-28.2274	-29.7275	-32.3837	-57.1848	-23.1299		-21.2012	-45.2705	-48.7741	-29.1901	-10.9562		-29.3411	-33.5015	-21.9357	-36.2648	-37.9766	-22.6868	-41.0752	-30.6892	-32.7098	-24.0346	-33.4842	-30.8474	3.35785	21.7696	-21.738	-31.2065	-35.9298	-18.4234	-30.1896	-26.7617		-22.6869	-20.7096
	-58.8938	1.99618	-23.6758	2.72249	-15.8874	-30.6768	-17.1207	-28.6169	-37.3623	-33.6709	-35.6661	-30.6079	-28.0726	-21.0596	-22.3846	-22.6882	-34.3316	-57.4066	-20.0869	-39.7829	-11.8817	-32.1842	-25.3696	-9.24322	2.88061	-41.076	-38.862	-35.3556	-9.75488	-28.003	-16.7759	4.0665	-31.9624	-17.8952	-7.21957	-6.47685	-27.3033	-24.9465	-1.27416	14.6485	-4.63736	-27.1982	-28.8783	-24.6554	-35.8446	-11.7389	-47.7284	2.30391	-7.47097
	-68.4674	-20.5614	-41.9645	-18.6259	-36.2389	-51.9733	-44.1093	-45.197	-53.0593	-42.0044	-42.8879	-38.7981	-46.9654	-51.6526	-39.0932	-28.9931	-56.8225	-58.0339	-35.8534	-26.2409	-34.8946	-54.4592	-45.2954	-36.6258	-30.4028	-40.526	-38.7826	-36.0308	-31.6048	-44.6535	-40.8975	-19.5924	-60.0241	-47.6335	-33.8974	-28.0258	-45.7769	-50.0559	-15.3743	-13.9108	-38.4348	-50.3935	-42.0662	-37.5704	-39.9296	-46.6018	-15.6462	-17.556	-22.4741
	0.931899		37.104	25.7181	28.5448	3.67714	14.5738	9.50666	-7.22333	8.63695	13.9484	8.84987		3.36781		14.7709	11.6495		5.85752	0.269681	32.1229	1.06764	4.57453	7.34944	27.384	23.067		21.1862	21.0544	10.4481		60.417	4.91731	38.9918	4.73511	29.9456	7.42017	6.50417	48.3107	75.2746	28.2283	2.63851	7.05612	19.8615	-1.28455	17.7106	59.6997		35.6151
		11.295	-3.93351	-36.011	-0.298583	-17.5784	-14.8925	-21.7562	-26.7345	-22.3323	-10.8381	-14.2817	-19.8015	-15.7162	-15.782	-6.2925	-13.9661	-12.9601	1.37128	33.8954	-13.4399	-26.4746	-17.4651	-5.3455	11.3815	-1.16429	-15.3264	-14.3528	-0.438247	-16.3107	-14.6162	15.0844	-33.5298	-13.711	-8.63145	1.13388	-22.6647	-17.6412			-16.8017	-20.9301	-15.6063	5.13251	-16.2989	-12.5349	12.2582	16.4967	3.8839
		-13.517	-29.2687	-33.4157	-47.1957	-45.1776	-35.8928	-43.8522	-68.9713	-54.8298	-47.3624	-39.4131	-49.8866	-54.174	-37.8645	-35.9949	-48.8687	-34.6152	-36.027	19.2921	-28.1719	-54.3943	-58.9156	-44.4532	-20.9284	-39.5653	-55.218	-37.2355	-32.296	-34.6427	-49.9606	-21.3551	-44.3153	-38.9675	-42.6542	-35.1297	-53.4687	-55.6098	-18.5709	-7.12098	-56.4445	-40.0418	-51.8594	-47.2778	-56.6214	-35.8273		-23.1843	-23.3569
	-0.999299	-0.404745	-0.81018	-0.596638	-0.789214	-1.01657	-0.816286	-1.2688	-1.9617	-1.40598	-1.17843	-1.09814	-1.44522	-1.23083	-1.00021	-0.889141	-1.05024	-1.61281	-0.608438	-0.365005	-0.641829	-1.63456	-1.62221	-0.920632	0.10425	-0.880334	-1.1562	-0.997484	-0.383536	-1.1252	-1.20919	0.33544	-1.39615	-0.792489	-0.765846	-0.290057	-1.32319	-1.19038	0.170826	0.531924	-0.736587	-1.18037	-1.2594	-0.934269	-1.32462	-0.621035	-0.0420114	-0.139284	-0.0949096
[truncated: 8 more columns]

## Sheet: Sheet1
sd1.5	alcohol	art collection	backpack	basin	beer	biscuit	book	bowl	cigar	cigarettes	cleaner	clothes horse	coffee	cooker	cup	desktop	dress	drug	earphone	gun	handbag	kettle	lamp	lighter	makeup	mansion	mop	necklace	necktie	oven	pen	pencil	perfume	pill	pillow	plastic bag	pot	potato chips	power bank	private jet	purse	razor	scissors	soap	soccer	suit	supercar	tissue	toothbrush
变浅count	11	4	1	4	6	5	2	11	4	3	4	11	5	4	7	9	3	12	7	4	11	11	3	2	9	4	11	6	5	6	12	6	13	9	6	11	3	3	5	5	6	10	5	13	10	2	6	12	4
变深count	0	4	1	6	5	0	3	0	1	2	13	1	2	3	1	0	10	1	0	4	0	3	6	1	2	5	1	4	5	1	1	2	0	0	0	0	6	3	9	1	2	0	8	0	1	11	1	0	6
sd2.1	alcohol	art collection	backpack	basin	beer	biscuit	book	bowl	cigar	cigarettes	cleaner	clothes horse	coffee	cooker	cup	desktop	dress	drug	earphone	gun	handbag	kettle	lamp	lighter	makeup	mansion	mop	necklace	necktie	oven	pen	pencil	perfume	pill	pillow	plastic bag	pot	potato chips	power bank	private jet	purse	razor	scissors	soap	soccer	suit	supercar	tissue	toothbrush
变浅count	0	1	2	2	3	1	2	4	0	0	4	0	2	3	1	7	2	2	5	0	1	2	2	2	5	0	2	0	1	5	1	1	3	4	1	0	4	1	1	0	2	5	3	2	5	3	0	1	4
变深count	13	13	7	8	9	7	9	8	13	8	4	5	3	11	7	3	6	14	4	14	6	7	7	7	0	14	8	6	5	5	11	7	5	7	5	8	7	3	0	14	1	5	3	9	8	4	17	3	1
SDXL	alcohol	art collection	backpack	basin	beer	biscuit	book	bowl	cigar	cigarettes	cleaner	clothes horse	coffee	cooker	cup	desktop	dress	drug	earphone	gun	handbag	kettle	lamp	lighter	makeup	mansion	mop	necklace	necktie	oven	pen	pencil	perfume	pill	pillow	plastic bag	pot	potato chips	power bank	private jet	purse	razor	scissors	soap	soccer	suit	supercar	tissue	toothbrush
变浅count	6	6	4	8	5	6	6	5	3	5	8	5	6	4	6	7	5	4	5	5	7	3	3	5	11	7	4	6	4	6	5	5	9	9	5	4	4	4	7	5	5	6	10	9	5	3	4	8	7
变深count	7	3	0	2	0	5	2	4	5	5	0	2	4	1	2	1	0	5	2	8	2	4	1	4	0	2	1	3	2	1	4	3	2	3	1	2	5	5	3	2	4	4	1	1	5	6	3	3	1
midjourney	alcohol	art collection	backpack	basin	beer	biscuit	book	bowl	cigar	cigarettes	cleaner	clothes horse	coffee	cooker	cup	desktop	dress	drug	earphone	gun	handbag	kettle	lamp	lighter	makeup	mansion	mop	necklace	necktie	oven	pen	pencil	perfume	pill	pillow	plastic bag	pot	potato chips	power bank	private jet	purse	razor	scissors	soap	soccer	suit	supercar	tissue	toothbrush
变浅count	0	1	1	2	1	0	1	0	0	0	1	0	0	0	0	1	1	0	1	3	1	0	0	0	7	2	0	1	2	1	0	7	0	1	1	2	0	0	5	9	1	0	0	1	0	1	3	2	3
变深count	9	6	12	10	10	12	11	15	16	15	13	12	16	14	13	13	12	14	8	7	10	15	16	12	5	10	13	12	8	14	15	4	14	12	9	6	14	13	3	3	9	13	14	11	13	10	4	5	6
sd1.5	alcohol	art collection	backpack	basin	beer	biscuit	book	bowl	cigar	cigarettes	cleaner	clothes horse	coffee	cooker	cup	desktop	dress	drug	earphone	gun	handbag	kettle	lamp	lighter	makeup	mansion	mop	necklace	necktie	oven	pen	pencil	perfume	pill	pillow	plastic bag	pot	potato chips	power bank	private jet	purse	razor	scissors	soap	soccer	suit	supercar	tissue	toothbrush
变浅count	214.357	127.829	39.1167	119.845	151.6	145.812	55.9519	229.916	87.5724	102.765	92.1913	325.176	167.524	132.305	182.27	222.958	111.68	385.512	232.049	88.1876	350.774	283.098	105.732	66.8443	252.876	140.483	299.261	191.673	123.416	172.646	297.585	191.83	344.999	268.598	218.618	324.262	91.62	45.7465	130.251	160.674	205.469	325.607	141.842	345.059	311.605	89.8191	236.021	328.247	113.673
变深count	0	-72.3108	-12.7659	-104.956	-91.1329	0	-63.5325	0	-12.9349	-54.8483	-307.998	-58.0758	-35.695	-60.2964	-14.4987	0	-218.839	-10.6879	-10.9481	-67.9295	0	-44.629	-119.434	-10.0896	-28.2472	-106.006	-11.7043	-96.9734	-85.8966	-28.6337	-13.2633	-32.3291	0	0	0	0	-90.715	-44.059	-169.353	-28.3256	-23.3088	0	-153.142	0	-15.9908	-235.061	-21.0714	0	-93.3419
sd2.1	alcohol	art collection	backpack	basin	beer	biscuit	book	bowl	cigar	cigarettes	cleaner	clothes horse	coffee	cooker	cup	desktop	dress	drug	earphone	gun	handbag	kettle	lamp	lighter	makeup	mansion	mop	necklace	necktie	oven	pen	pencil	perfume	pill	pillow	plastic bag	pot	potato chips	power bank	private jet	purse	razor	scissors	soap	soccer	suit	supercar	tissue	toothbrush
变浅count	0	14.0686	103.721	54.5179	79.0581	14.5853	81.9457	95.3906	0	0	95.3576	0	58.8389	93.3075	10.2026	159.91	91.7759	23.5466	153.055	0	13.9777	35.8277	38.1555	27.4716	174.784	0	36.8982	0	26.8555	136.141	29.8926	21.6231	70.5532	92.545	11.023	0	94.1193	21.1969	14.6979	0	93.8445	113.032	40.0228	43.6727	128.057	93.412	0	43.236	123.042
变深count	-403.681	-426.409	-129.679	-209.927	-310.124	-223.802	-253.187	-183.249	-409.387	-213.304	-65.3996	-154.833	-115.035	-303.052	-201.922	-59.8925	-176.973	-395.826	-101.519	-455.088	-227.187	-180.829	-196.778	-222.839	0	-476.104	-205.006	-171.006	-150.304	-175.122	-300.65	-192.339	-147.857	-112.004	-162.289	-310.024	-237.029	-90.9288	0	-402.319	-38.6883	-102.518	-127.667	-222.134	-168.551	-65.5999	-565.781	-73.4446	-16.2293
SDXL	alcohol	art collection	backpack	basin	beer	biscuit	book	bowl	cigar	cigarettes	cleaner	clothes horse	coffee	cooker	cup	desktop	dress	drug	earphone	gun	handbag	kettle	lamp	lighter	makeup	mansion	mop	necklace	necktie	oven	pen	pencil	perfume	pill	pillow	plastic bag	pot	potato chips	power bank	private jet	purse	razor	scissors	soap	soccer	suit	supercar	tissue	toothbrush
变浅count	164.578	162.046	74.6497	256.044	101.258	131.958	159.344	142.847	59.4172	106.697	255.964	121.863	103.082	131.33	169.658	227.31	230.455	114.935	168.22	101.883	164.958	71.7959	111.773	131.174	420.398	222.217	139.914	175.528	102.381	169.87	141.115	107.684	303.223	315.728	154.921	113.723	121.731	135.367	256.935	154.768	179.291	131.57	262.806	233.454	166.061	122.004	142.152	226.395	198.548
变深count	-143.814	-67.1381	0	-56.5278	0	-120.518	-62.9343	-70.7732	-134.794	-119.664	0	-56.4208	-83.4228	-44.0472	-43.2709	-27.5895	0	-127.442	-59.5965	-233.853	-54.0079	-102.15	-38.3896	-101.838	0	-73.6611	-17.7914	-44.4342	-66.8923	-33.8354	-73.4366	-79.6502	-67.562	-105.006	-13.4963	-103.288	-111.672	-142.587	-45.409	-72.1737	-81.5432	-75.2857	-18.1773	-11.8357	-122.838	-96.4019	-58.6419	-51.3521	-25.3621
midjourney	alcohol	art collection	backpack	basin	beer	biscuit	book	bowl	cigar	cigarettes	cleaner	clothes horse	coffee	cooker	cup	desktop	dress	drug	earphone	gun	handbag	kettle	lamp	lighter	makeup	mansion	mop	necklace	necktie	oven	pen	pencil	perfume	pill	pillow	plastic bag	pot	potato chips	power bank	private jet	purse	razor	scissors	soap	soccer	suit	supercar	tissue	toothbrush
变浅count	0	11.295	37.104	41.3427	28.5448	0	14.5738	0	0	0	13.9484	0	0	0	0	14.7709	11.6495	0	18.6078	67.2064	32.1229	0	0	0	129.496	35.6053	0	21.1862	31.3522	10.4481	0	191.876	0	38.9918	15.1896	58.4165	0	0	110.03	236.021	28.2283	0	0	19.8615	0	17.7106	122.293	39.1097	60.1573
变深count	-360.679	-144.037	-313.804	-235.28	-267.423	-355.895	-278.725	-457.806	-698.989	-511.936	-424.425	-379.67	-520.278	-431.873	-346.049	-310.672	-374.756	-567.123	-214.8	-190.482	-246.789	-580.868	-588.57	-318.582	-92.3814	-351.361	-402.289	-363.451	-184.483	-397.5	-432.012	-88.9985	-487.649	-317.285	-267.302	-147.557	-478.437	-405.421	-55.2404	-56.0184	-253.927	-407.07	-443.964	-348.473	-448.223	-248.435	-117.757	-104.072	-117.943
[truncated: 8 more columns]
