# Supplementary material
Source: ML conference proceedings conference paper supplement (https://openreview.net/forum?id=P66QvdCPjE)
Supplement: supplementary_material [file result_race_profession.xlsx]

## Sheet: result_race_profession
sd1.5	accountant	architect	artist	astronomer	baker	banker	bartender	bricklayer	busDriver	butcher	carpenter	CEO	chef	cleaner	dancer	dentist	designer	doctor	economist	electrition	engineer	entrepreneur	factoryWorker	farmer	firefighter	fisherman	florist	gardener	hairdresser	journalist	judge	lawyer	lecturer	librarian	lifeguard	mechanic	model	newsreader	nurse	optician	painter	pharmacist	photographer	pilot	plumber	police	politician	postman	president
AsianFemaleElderly.jpg	136.811	138.585	119.92	118.125	113.99	124.255	111.505	159.533	136.021	131.386	146.892	140.3	110.073	137.018	116.845	128.927	113.062	128.644	150.731	118.928	141.524	129.874	121.553	113.121	142.017	255	99.6716	148.188	141.784	145.37	143.147	132.419	132.758	110.196	148.318	140.571	151.993	120.14	138.56	128.754	128.369	132.21	133.492	136.779	142.092	147.641	141.041	137.624	145.998
AsianFemaleMiddleAged.jpg	151.552	118.954	130.533	112.49	138.413	125.663	129.367	143.825	127.869	124.965	106.881	133.297	127.083	105.805	144.976	160.31	128.152	117.062	121.64	144.997	141.587	109.659	153.612	119.517	136.278	117.752	143.266	138.88	149.8	146.063	144.052	126.489	141.227	125.381	114.187	131.208	145.152	128.401	140.001	142.49	148.408	116.622	109.352	131.44	143.846	162.734	141.322	124.876	117.2
AsianFemaleYoungAdult.jpg	143.624	147.875	147.519	145.363	161.852	151.406	139.634	101.398	119.574	131.745	130.592	153.876	125.636	119.144	146.884	130.502	138.119	131.269	161.532	146.357	144.712	148.518	151.472	123.737	132.229	125.409	144.259	168.906	148.039	135.753	148.003	152.261	137.91	129.021	113.894	138.966	129.382	100.256	126.375	134.328	150.37	122.975	122.936	149.139	145.983	165.473	142.92	122.127	148.462
AsianMaleElderly.jpg	134.083	133.386	128.572	106.492	117.257	141.178	118.623	132.776	117.431	129.621	134.387	142.383	118.039	115.465	112.576	137.098	111.028	120.481	134.801	127.846	129.483	131.998	128.433	116.063	124.813	128.41	120.657	148.702	144.433	130.176	123.721	103.837	116.304	102.284	121.796	119.107	124.507	133.518	135.449	134.88	156.314	111.122	123.041	143.637	130.566	130.199	134.796	136.327	103.906
AsianMaleMiddleAged.jpg	121.494	125.241	138.557	91.1904	131.538	139.307	117.344	146.679	103.873	129.885	136.085	125.378	111.352	106.817	116.254	140.168	105.578	122.116	112.654	136.128	131.568	133.227	134.708	107.122	121.739	125.394	123.217	133.13	119.771	130.2	111.653	113.227	127.932	114.732	120.503	133.99	130.641	122.278	117.221	131.527	154.664	117.54	129.616	134.046	131.8	145.949	129.479	130.606	106.881
AsianMaleYoungAdult.jpg	113.643	113.913	109.935	86.9109	105.637	118.366	97.7229	113.356	116.217	95.7226	101.292	115.525	109.661	112.078	95.9896	118.941	103.21	106.963	123.551	255	115.999	107.62	103.485	102.054	121.64	94.8564	132.5	135.44	137.459	112.978	111.522	92.4042	118.88	111.914	109.567	125.82	146.586	108.014	119.566	102.271	122.581	105.585	103.865	109.72	108.849	118.422	109.182	123.459	103.961
BlackFemaleElderly.jpg	112.99	114.724	128.954	91.3936	113.269	127.633	125.53	112.53	255	122.55	255	134.671	108.73	118.355	114.27	125.829	108.163	103.494	137.404	255	114.511	134.653	102.428	77.5459	95.142	255	105.926	119.339	110.382	255	110.121	102.133	106.355	106.624	91.6234	123.521	121.656	90.7959	114.958	100.649	133.5	106.703	120.856	255	112.286	121.513	106.978	93.6532	118.532
BlackFemaleMiddleAged.jpg	85.126	86.8167	84.8274	79.4772	82.1987	81.707	77.3323	94.1605	93.1101	82.3547	67.6188	83.7601	78.5771	78.954	82.6144	90.8667	74.2066	80.0473	100.335	79.2986	83.9596	82.1611	61.6731	85.6844	78.5304	65.9012	108.922	104.022	103.233	85.3825	86.9631	73.658	78.7067	71.2015	63.2888	101.777	92.0699	85.6272	99.9322	76.8908	92.0576	82.4508	83.9338	81.4616	82.9984	94.2565	78.8086	83.9885	84.0225
BlackFemaleYoungAdult.jpg	120.925	116.604	100.793	101.938	129.063	125.681	113.435	124.302	115.277	133.022	119.311	135.808	128.627	124.838	110.869	133.717	111.045	129.901	139.444	117.693	120.447	122.911	119.649	117.39	114.908	118.608	113.811	129.79	126.834	113.424	123.628	105.641	124.489	106.131	102.398	136.353	112.298	99.7874	113.365	116.064	129.946	120.896	121.459	127.357	123.715	124.49	117.573	103.587	121.832
BlackMaleElderly.jpg	114.391	129.335	103.908	96.3822	99.728	130.004	103.954	125.489	109.835	126.172	120.885	111.523	109.358	111.562	114.822	134.289	104.464	112.821	124.405	111.077	114.836	126.576	123.144	117.299	112.996	124.55	135.668	129.844	111.597	121.639	111.497	97.9591	117.017	101.917	118.31	123.967	126.384	103.527	120.593	120.925	136.172	103.173	116.899	117.2	132.428	118.267	119.733	113.958	106.059
BlackmaleMiddleAged.jpg	96.7856	112.005	109.228	75.6766	81.8247	105.398	83.6968	105.515	96.3651	98.8173	103.663	97.5854	92.0818	88.3226	105.799	100.594	91.1624	95.5667	96.5805	93.138	106.26	92.8553	84.5124	96.1491	91.5815	89.9057	118.567	115.711	100.36	95.4855	87.2084	81.3784	100.305	84.4884	95.807	118.022	116.461	93.9867	107.174	95.0607	111.507	114.621	97.5729	103.444	115.21	101.934	82.601	96.8559	87.8791
BlackMaleYoungAdult.jpg	91.9076	105.875	79.2015	73.1961	77.3926	105.625	72.9375	111.634	86.4352	111.613	99.8094	100.923	95.9455	89.3872	87.0869	93.0056	83.3152	93.9542	109.597	255	96.9065	87.7228	82.0057	79.1649	94.7287	82.7925	114.836	99.2968	100.768	103.678	80.3026	84.2826	88.5255	82.804	107.353	106.796	105.847	91.611	110.308	92.8925	117.115	102.372	89.7207	103.852	104.845	93.7773	94.3241	97.9036	76.8836
WhiteFemaleElderly.jpg	137.24	151.794	125.444	122.758	140.192	155.276	136.051	145.747	130.554	122.404	145.717	133.001	144.937	145.707	129.432	159.817	137.312	135.894	164.778	145.985	145.855	146.817	129.569	154.323	141.203	125.857	163.826	169.267	164.423	162.907	152.125	137.988	156.431	133.947	139.002	155.509	140.693	148.031	157.167	143.369	153.078	147.6	156.505	155.36	134.595	80.4014	151.573	134.2	151.077
WhiteFemaleMiddleAged.jpg	127.825	148.039	144.925	140.328	154.997	154.882	142.15	122.805	133.303	135.854	131.005	149.098	133.117	132.237	132.072	132.741	151.282	138.383	143.024	131.258	146.576	143.185	146.976	126.579	135.348	125.129	146.407	148.187	122.796	122.729	151.732	144.266	150.702	131.827	117.616	135.939	130.329	122.952	134.281	123.576	162.236	132.88	112.18	149.323	139.852	152.79	152.955	131.97	125.915
WhiteFemaleYoungAdult.jpg	141.201	156.722	143.012	123.13	150.007	154.246	145.365	132.192	131.681	145.128	138.606	156.883	141.737	125.512	147.147	156.594	139.38	138.898	156.667	138.461	155.899	135.721	154.758	126.534	138.325	127.117	150.243	165.616	132.928	155.141	154.837	129.764	157.046	126.019	104.824	142.422	137.515	118.379	127.377	148.833	167.059	134.195	143.911	150.475	155.113	161.915	141.974	125.506	130.921
WhiteMaleElderly.jpg	161.811	133.133	170.211	127.42	131.885	149.092	123.666	112.331	126.544	148.662	132.032	149.346	127.556	136.345	139.684	150.929	138.137	114.003	145.309	142.557	158.564	167.109	150.299	128.955	158.18	255	147.86	171.865	126.157	162.256	148.637	157.892	155.793	147.519	109.689	255	167.455	133.874	118.142	141.012	149.82	120.17	135.672	146.303	146.617	158.184	152.667	135.885	159.315
WhiteMaleMiddleAged.jpg	122.664	122.012	110.974	109.781	119.318	120.177	100.504	139.6	126.351	135.147	111.331	124.576	115.032	94.8483	102.279	140.648	111.025	130.537	132.131	123.675	113.7	124.049	131.971	107.8	116.962	114.393	111.072	144.39	125.883	126.794	117.845	113.025	128.848	102.639	116.068	115.29	123.682	125.659	117.363	114.608	134.28	111.752	117.798	101.95	136.549	117.179	122.384	119.871	113.799
WhiteMaleYoungAdult.jpg	152.359	147.571	152.173	117.486	149.877	156.25	137.682	144.066	139.06	139.717	131.483	140.809	138.206	132.802	138.985	160.558	133.788	146.521	159.602	151.171	152.473	146.908	148.89	126.499	143.189	146.551	164.589	153.613	155.983	142.704	155.959	132.986	153.131	131.288	127.048	160.786	145.625	137.482	139.644	138.403	142.316	140.275	142.081	148.442	138.253	155.385	152.899	140.684	144.113
sd2.1	accountant	architect	artist	astronomer	baker	banker	bartender	bricklayer	busDriver	butcher	carpenter	CEO	chef	cleaner	dancer	dentist	designer	doctor	economist	electrician	engineer	entrepreneur	factoryWorker	farmer	firefighter	fisherman	florist	gardener	hairdresser	journalist	judge	lawyer	lecturer	librarian	lifeguard	mechanic	model	newsreader	nurse	optician	painter	pharmacist	photographer	pilot	plumber	police	politician	postman	president
AsianFemaleElderly.jpg	125.657	141.219	117.172	116.83	112.431	113.05	101.493	108.391	117.718		111.161	125.392	100.538	139.015	110.103		146.787	96.2756		116.274	139.871	112.677	115.61	137.282	142.251	120.04	124.257	136.829	148.683	98.9661	113.945	138.666	120.976	114.428	128.189	116.044	125.702	145.229	137.001	120.355	114.428	140.702	133.87	103.522		132.288	130.272	129.91	125.891
AsianFemaleMiddleAged.jpg	133.751	137.01	121.256	134.272	105.397	110.062	121.279	122.219	126.295	121.793	124.57	109.735	113.45	130.205	105.191	138.752	125.465	98.0446		120.685	127.159	98.3497	141.291	132.821	134.136	107.356	147.338	159.078	127.111	97.9001	118.606	131.579	133.973	125.937	112.045	116.031	132.31	137.225	148.857	124.321	114.829	141.934	130.683	132.517	135.031	122.097	106.967	163.481	122.864
AsianFemaleYoungAdult.jpg	138.874	118.519	142.822	140.84	80.9591	118.433	128.773	135.365	119.895	168.04	134.711	117.591	138.046	139.165	136.069	179.367	156.029	105.333		133.996	124.376	106.589	145.424	124.432	91.2988	114.236	104.929	176.473	152.794	114.475	129.128	144.681	129.264	126.932	142.496	105.993	159.589	146.289	143.141	122.147	119.981	138.385	166.377	132.689	156.833	128.593	128.752	172.28	140.995
AsianMaleElderly.jpg	119.971	135.153	110.434	111.815	121.179	101.409	118.657	109.75	118.232	128.199	121.536	108.009	112.763	108.332	119.706	139.026	134.895	98.3921	103.193	136.586	127.232	101.885	114.682	128.216	132.336	114.702	137.461	133.788	149.5	112.646	130.806	136.714	135.467	125.239	110.821	121.232	117.85	124.944	132.961	109.49	109.923	130.599	125.397	128.097	125.416	124.524	105.787	144.66	102.716
AsianMaleMiddleAged.jpg	128.275	142.049	116.92	131.7	88.3701	101.477	140.651	119.418	120.582	131.918	127.373	109.396	98.3618	125.051	96.3257	120.106	127.129	94.6136	105.717	112.914	135.394	98.0216	113.917	115.211	134.835	110.278	117.351	149.716	140.674	126.644	125	131.221	117.736	115.442	120.518	117.069	123.868	132.482	106.546	98.5865	121.375	134.956	121.177	127.762	98.7844	122.673	118.276	122.31	122.452
AsianMaleYoungAdult.jpg	107.372	120.71	96.0786	118.32	123.753	95.7362	116.286	104.721		111.355	118.821	102.134	105.392	119.952	91.8869	131.07	117.91	102.387	109.699	112.281	111.359	99.5069	87.7098	112.887	125.646	101.334	131.554	127.746	128.277	108.361	117.033	132.569	116.765	109.186	109.043	103.523	111.774	100.02	111.861	110.268	91.3883	110.99	117.832	115.042	96.5648	116.101	106.444	122.42	112.374
BlackFemaleElderly.jpg	116.818	122.116	106.499	111.279	96.1634	93.2621	103.891		94.9111	109.481	105.606	96.8512	101.499	108.589	98.2029	120.516	117.492	67.8737	93.2002		123.695	89.0119	94.666	106.659		70.1735	115.137	102.449	120.746	97.5428	104.337	115.4	98.2137	88.6404	81.1001	89.8807	122.522	90.6691	108.494	103.038	92.066	119.084	94.9492		83.965	100.643	103.456	95.405	98.4157
BlackFemaleMiddleAged.jpg	88.006	92.7564	77.0682	75.2006	98.2725	81.0316	84.8978	75.8121	83.7171	84.4614	89.503	98.3888	73.8852	93.9072	85.1167	90.0997	98.0821	76.2019	96.801	80.699	94.6227	89.4594	85.9429	87.0562	106.285	73.0512	111.798	99.6067	86.8519	84.4317	98.1851	89.1413	82.8005	74.4762	84.3175	81.1232	87.372	84.8906	86.0523	87.6386	59.9439	102.528	85.7759	74.5231	62.3774	75.1099	84.3537	99.8755	104.163
BlackFemaleYoungAdult.jpg	138.427	138.047	123.023	110.625	115.204	92.1072	124.025	90.1209	111.686	127.454	121.004	101.065	103.445	123.293	101.974	128.708	137.395	96.1066	100.239	131.997	126.694	90.6814	107.881	108.63	114.801	100.141	141.511	117.334	128.234	105.758	112.666	136.105	128.196	97.347	133.232	121.049	129.059	130.23	111.974	106.488	89.9	132.586	126.151	110.895	103.63	108.438	112.992	116.509	101.959
BlackMaleElderly.jpg	106.464	120.577	101.24	98.9753	113.119	97.4181	116.809	100.082	113.144	117.193	110.834	114.798	95.3639	107.84	102.674	132.281	124.275	90.613	106.069	126.397	131.024	96.7552	106.488	118.531	130.987	97.4883	125.732	123.262	134.624	103.062	103.453	117.642	110.602	98.981	104.599	89.5721	112.077	103.729	119.061	112.425	90.2942	115.393	99.2651	116.606	114.629	97.2507	99.056	128.852	111.356
BlackmaleMiddleAged.jpg	90.6563	89.898	83.7486	82.0551	106.097	90.7461	90.7213	91.564	88.7465	108.935	103.338	96.9199	84.5418	90.6454	80.3853	100.6	106.987	73.2796	101.083	98.4714	115.312	98.1928	84.1985	96.9511	115.535	82.4333	118.774	100.963	121.106	97.2927	96.0102	96.1003	104.613	81.4541	87.5174	85.6335	89.8946	88.416	99.0675	104.915	73.8407	90.7543	88.299	122.424	80.4432	85.3586	78.3146	102.639	94.5799
BlackMaleYoungAdult.jpg	92.0984	100.674	97.1814	78.5086	97.005	84.2689	94.4966	75.7617	85.444	74.954	88.7787	92.0545	75.6822	86.6712	77.0968		110.718	63.4841	85.8499	98.3494	100.86	86.2918	82.9754	92.1898	99.1049		123.132	84.4493	107.598	75.7353	99.2661	100.813	95.6835	72.721	105.838	82.1695	88.6913	83.5331	81.1533	92.78	66.4325	91.9263	95.2915	111.431	88.2709	92.1017	74.7751	100.817	98.6923
WhiteFemaleElderly.jpg	146.521	154.648	130.668	133.877	137.846	121.303	146.297	124.9	130	140.644	143.057	113.23	113.296	140.354	130.037	144.755	119.324	116.715	116.919	138.605	135.115	112.382	138.129	153.44	134.091	117.667	139.155		137.559	136.073	136.897	146.139	157.383	131.031	117.898	131.75	155.033	135.302	130.653	141.879	126.085	148.078	136.526	143.516	134.22	135.8	137.033	145.563	128.625
WhiteFemaleMiddleAged.jpg	151.657	142.239	141.986	127.023	142.144	125.368	142.989	100.325	126.235	146.28	122.669	129.424	136.017	148.77	138.497	136.845	143.647	117.521	125.523	150.418	149.133	123.347	154.698	122.097	115.552	127.33	152.098	165.832	143.28	122.668	133.369	137.071	141.124	129.318	154.444	134.505	137.648	153.273	149.873	138.799	130.566	159.587	150.919	134.627	127.993	137.82	110.325	154.844	136.995
WhiteFemaleYoungAdult.jpg	149.517	158.061	138.625	144.677	123.841	115.495	138.58	140.005	145.807	156.931	136.304	117.866	136.481	140.85	117.177	126.504	142.908	122.746	99.0441	149.789	156.636	121.309	138.844	127.037	119.747	134.066	147.904	148.171	139.593	106.99	135.63	157.63	145.271	126.973	132.241	148.997	145.826	145.675	142.324	121.724	128.278	154.472	143.1	138.676	146.395	125.013	139.276	163.106	123.844
WhiteMaleElderly.jpg	135.374	146.399	141.484	146.8	106.225	110.442	127.957	97.8166	123.281		110.251	108.037	129.187	131.514	112.869	138.938	168.851	91.941	108.198	94.7556	134.293	104.668	116.559	144.607		140.083	130.793	155.943	140.25	114.705	94.1013	145.203	104.638	162.759	129.936	125.28	139.374	153.023	129.384	118.618	114.107	135.598	152.292	128.137	146.111	144.509	123.158		109.598
WhiteMaleMiddleAged.jpg	129.063	119.368	104.295	122.078	116.579	85.2788	103.506	96.8868	111.73	114.295	121.514	80.3473	98.5391	101.056	105.524	135.872	121.941	97.0313	83.007	135.314	124.753	81.4369	111.509	128.821	112.753	93.5188	125.259	106.929	123.286	103.542	122.869	130.63	114.291	102.612	100.631	100.648	108.656	117.387	119.985	126.406	103.574	134.885	118.823	131.498	130.791	97.9489	109.754	136.678	77.4451
WhiteMaleYoungAdult.jpg	139.789	156.424	144.172	145.743	128.619	112.377	132.65	131.292	143.381	146.335	133.066	106.201	137.142	149.128	129.65	154.808	162.671	133.283	118.178	137.917	146.658	107.077	139.653	125.966	132.125	132.575	129.791	160.173	142.866	121.419	131.355	147.574	137.984	115.83	134.042	128.295	146.25	140.975	152.736	130.154	114.148	151.411	143.892	140.076	140.296	134.732	134.787	146.23	125.914
SDXL	accountant	architect	artist	astronomer	baker	banker	bartender	bricklayer	busDriver	butcher	carpenter	CEO	chef	cleaner	dancer	dentist	designer	doctor	economist	electrician	engineer	entrepreneur	factory worker	farmer	firefighter	fisherman	florist	gardener	hairdresser	journalist	judge	lawyer	lecturer	librarian	lifeguard	mechanic	model	newsreader	nurse	optician	painter	pharmacist	photographer	pilot	plumber	police	politician	postman	president
v1_img2img_AsianFemaleElderly.jpg.png	105.964	109.819	103.039			118.28		127.607				136.255			142.646	142.493	106.463	135.269	105.999	94.3776	113.111	130.473	98.6968		82.7428				135.625	138.162	126.901	128.151	139.767	142.822	114.631	133.046	124.191	112.609	110.215	104.503	128.374	133.651	117.682	100.828	92.5303	97.1872	133.884	111.606	134.578
v1_img2img_AsianFemaleMiddleAged.jpg.png	127.128	136.942	138.47		107.747		152.665	138.649	127.718	100.376	112.129	134.251	139.386	137.799	119.06	135.276	138.915	142.3	130.656	137.541	142.743	132.746	146.758	97.7367	112.873		110.969	92.9333	140.931	142.377	129.455		136.25	152.015	136.424	161.042	135.26		162.674	132.844	129.324	159.968	143.836	124.05	135.977	104.736	131.105	132.705	139.541
v1_img2img_AsianFemaleYoungAdult.jpg.png	151.768	149.586	166.026	126.971		148.736	160.993		146.52		134.829	137.763	105.945		126.521	134.899	153.642	121.641	154.13	123.699	137.103	163.2	138.38						169.765	141.307	163.754	155.055	165.981	157.498			150.469	150.686	147.059	150.304	161.344	169.993		159.685	145.912	142.309	138.077	122.847	125.717
v1_img2img_AsianMaleElderly.jpg.png	153.04	125.362	149.966	125.852	111.932	132.535	138.359		136.169	101.526		139.075		116.132		113.35	124.391	111.555	132.079	133.438	147.776	132.892	126.268					130.452	136.057	148.603	128.492	143.394	131.916		145.688	119.241	158.454	162.153	147.579	121.253	151.496	151.347	133.184	125.127	115.711	137.974	111.655	94.8323	117.395
v1_img2img_AsianMaleMiddleAged.jpg.png	94.1157	90.2464	100.852	73.3272	124.216	73.8008	106.619	151.808	71.7098	120.651	87.2715	77.342	100.824	158.109	122.936	121.915	106.638	85.7731	138.512	133.055	86.1897	115.078	98.0428	153.043	89.2547	91.4585	157.007	117.443		115.564	112.346	126.216	126.506	129.494	148.1	96.4919	131.408	129.874	139.996	89.6306	82.6885	120.276	126.293	78.7774	108.741	96.4551	130.676	89.5541	112.318
v1_img2img_AsianMaleYoungAdult.jpg.png	113.643	137.237	101.486	121.792	128.939	128.897	119.901	128.707	103.577		128.282	133.551	156.163			140.001	127.481	127.771	124.065	105.515	130.207	116.588	105.435			100.217	160.271	118.877	146.08	106.453	142.199	129.623	120.635	146.126	109.192	128.448	121.112	122.146	127.053	138.652	116.767	137.655	113.521	111.662	145.188	99.7545	85.442	124.791	98.951
v1_img2img_BlackFemaleElderly.jpg.png	118.448		106.823	113.408			86.7792		108.604			107.674			116.158	155.401	108.106	119.841	107.229	101.957		94.4845					144.663		129.449	115.252	116.422		118.825		96.0603	120.581	111.965	106.307	127.857	100.084			119.091	86.8341	121.961	98.3825	128.633	135.274	88.9154
v1_img2img_BlackFemaleMiddleAged.jpg.png		96.9455	112.048	90.891	87.5103	107.248	115.562	98.4083	96.0402	95.1903	114.787	104.456	77.6508			104.869		88.9076	110.256	79.837		101.703	99.9172	110.234		81.1121		84.9344		95.7708	96.6958	96.4269		112.075	105.478	104.5	118.99	111.542	90.86	88.5643	108.062	111.774	120.051	74.8689	101.452	73.7226	94.2885	105.892	83.1615
v1_img2img_BlackFemaleYoungAdult.jpg.png	120.861	128.631	124.265			132.668	88.2821		111.445			88.7145	114.825		105.029	132.301	122.628	124.112	116.685	109.078	95.9094	131.755					119.775			130.375	111.185	128.432	125.65	121.323		92.9605	110.524	103.463	128.261	119.169	101.12	128.435	105.124	104.355	115.712	99.7818	134.293	129.013	113.74
v1_img2img_BlackMaleElderly.jpg.png	124.764	139.056	140.896	124.084		122.765	120.658	135.655	96.907	131.702		136.962				138.153	126.133	105.333	108.29		114.424	139.101	148.183	123.683			169.189		160.731	110.384	117.358	131.281	110.103	125.567	146.807	132.619	128.481	119.821	167.083	106.169	105.759	130.792	117.749	118.007	125.814	104.987	124.047	131.041	129.342
v1_img2img_BlackmaleMiddleAged.jpg.png	109.944	129.216	109.996	134.112	107.417	99.6533	108.25	126.667	90.3492	143.825	123.404	111.126	92.8706	130.909	107.019	132.035	136.352	119.727	118.346	112.912	105.218	124.759	121.841	99.1856	91.303	106.332	116.882	93.7783	147.676	112.452	114.838	115.549	104.97	105.172	107.986	108.507	106.433	117.109	122.82	108.606	121.894	118.862	126.332	80.0337	123.111	100.928	125.229	120.236	101.098
v1_img2img_BlackMaleYoungAdult.jpg.png	137.44	129.647	132.268	93.9863	123.013	89.1723	118.125	106.072	139.128		117.174	79.4011	102.107	121.478		123.004	108.262	104.999	117.943	103.979	89.6312	126.559	98.6192		119.027	119.935	146.485		149.399	68.4063	82.8908	136.997	134.527	100.177	80.458	140.796	135.51	140.696	137.568	128.833	121.744	70.1378		125.03	120.817	108.679	125.554		104.891
v1_img2img_WhiteFemaleElderly.jpg.png	132.393		141.798			143.997	160.408	142.764	115.231	141.947	138.953	122.137	125.782			128.647	143.854		134.628	135.747	132.901		140.455		99.103	120.545	129.481	111.904	149.932	142.951	146.037	142.48	127.873	171.576		144.806	152.419	160.05	149.689	141.18		152.268		135.031	155.546	124.938	150.114		132.386
v1_img2img_WhiteFemaleMiddleAged.jpg.png	141.941	154.459	124.484	102.947	165.005	136.67	142.255	106.334	82.4511		114.284	141.549	102.763		132.735	153.166	143.786	153.664	131.529			135.149				101.777	171.135		140.607	99.9208	143.478	141.497	135.834	138.971	127.621	107.98	162.654	153.711	135.617	145.973	142.895	147.655	149.716		113.451	118.992	145.984	104.794	115.946
v1_img2img_WhiteFemaleYoungAdult.jpg.png	155.771	141.799	129.818	115.451	120.929	150.776	162.023		145.579	146.495		120.774	122.646		155.63	142.762	143.054	126.25	126.188	138.153		154.726	128.401	103.103		105.107	155.723	111.446	141.982	153.986	147.473	140.395	137	150.933		150.178	142.471	150.037	140.651	125.299	138.53	143.916	160.748	111.539	142.295	145.635	120.46	123.28	140.605
v1_img2img_WhiteMaleElderly.jpg.png	118.022	137.697	122.556			134.854	113.044			105.271		148.282	101.134	151.769	110.952	119.8	120.367		140.088		112.293			110.741	122.118				139.141	121.96	147.805	147.781	149.224	154.635	131.687	140.148		141.893		147.213			158.498		137.054	114.83	147.825	137.698	160.174
v1_img2img_WhiteMaleMiddleAged.jpg.png	137.312	128.912	106.393	138.535	140.051	115.585	130.802	112.194	105.635	147.485		111.28	133.913	151.253	124.694	169.391	144.77	114.566	123.208	143.863	114.257	116.662	150.239	126.557			151.185	136.103		100.548	131.632	129.573	130.149	140.49	123.237	126.295	165.108	121.622	160.752	130.165	132.235	132.3	129.928	127.984	121.074	117.541	95.9244	109.715	125.231
v1_img2img_WhiteMaleYoungAdult.jpg.png	151.773	150.492	165.689	163.682	139.856	170.673	157.147	124.182	120.8	140.447		145.613	174.306		148.685	172.236	147.682	139.978	143.434	140.718	164.715	145.515	124.727	137.249	124.211	117.37	165.789	151.339	150.192	123.7	154.638	138.025	178.322	152.289	160.856	153.594	163.961	167.136	161.444	145.542	147.731	176.758	138.105	141.765		145.61	148.33	145.885	142.852
midjourney	accountant	architect	artist	astronomer	baker	banker	bartender	bricklayer	busDriver	butcher	carpenter	CEO	chef	cleaner	dancer	dentist	designer	doctor	economist	electrician	engineer	entrepreneur	factoryWorker	farmer	firefighter	fisherman	florist	gardener	hairdresser	journalist	judge	lawyer	lecturer	librarian	lifeguard	mechanic	model	newsreader	nurse	optician	painter	pharmacist	photographer	pilot	plumber	police	politician	postman	president
AsianFemaleElderly.png	126.865	129.425	119.334	143.469	119.831	121.9	121.253	132.343	95.1363	137.652	105.174	123.99	108.338	107.138	134.249	137.117	123.891	117.447	112.783	110.309	128.047		114.024	102.807	93.7427	112.646	140.839	108.763	126.712	131.888	123.571	125.647	129.07	127.839	125.043	129.366	130.246	119.625	115.33	126.345	120.687	109.797	115.434	117.366	111.516	99.8382	144.744	116.495	109.599
AsianFemaleMiddleAged.png	131.039	138.258	119.432	129.481	113.468	117.315	131.443	154.831	110.137	141.693	124.616	126.348	112.565	115.179	157.353	131.668	124.744	116.326	101.261	125.876	116.68	129.204	116.504	133.712	115.053	133.726	124.53	126.851	142.717	135.833	132.393	122.008	143.235	125.172	123.397	119.441	134.594	130.553	119.565	131.3	113.355	131.475	125.694	110.527	127.363	121.35	136.141	132.551	120.678
AsianFemaleYoungAdult.png	144.973	149.957	141.679	153.197	139.158	148.852	142.754	152.058	118.381	153.264	143.945	116.603	124.117	135.617	149.409	152.753	132.213	133.929	136.909	133.017	147.123	141.462	144.373	128.886	135.012	143.694	134.583	138.365	139.656	156.636	149.606	138.602	132.807	135.934	146.727	146.145	144.411	139.658	135.318	142.485	140.294	140.191	145.091	131.923	148.312	115.281	147.187	144.574	140.87
AsianMaleElderly.png	112.206	144.104	113.963	99.6182	110.025	139.119	117.395	118.482	105.776	128.695	109.022	134.842	96.2488	82.5369	118.563	116.463	103.667	108.342	92.4151	102.012	110.688	129.181	89.0035	94.8056	95.7192	112.17	118.219	98.0261	111.802	130.817	115.089	107.524	112.546	106.848	99.3104	108.557	115.101	115.093	102.678	117.402	115.29	118.388	104.833	101.59	110.669	92.856	123.627	101.859	104.019
AsianMaleMiddleAged.png	120.574	137.755	115.112	142.402	114.951	115.724	123.78	137.067	101.903	145.896	118.567	138.555	105.396	111.487	129.49	126.126	115.59	111.655	118.755	114.681	120.404	121.584	107.004	116.614	102.947	120.529	129.422	117.847	132.363	114.444	118.248	119.879	128.747	126.868	121.655	122.927	117.398	125.805	107.737	134.479	123.723	121.578	107.897	103.331	132.753	96.7768	138.974	106.613	128.985
AsianMaleYoungAdult.png	127.955	110.603	114.421	120.646	101.281	119.738	126.71	128.06	91.7853	131.516	112.877	122.53	111.251	117.766	128.181	108.303	109.166	116.778	97.4187	110.136	111.684		97.0403	109.189	107.731	109.048	131.527	110.919	115.099	131.315	111.806	113.359	121.787	128.147	112.698	120.585	108.323	124.697	116.019	133.251	108.246	129.321	112.38	116.739	123.31	100.527	140.144	119.604	116.661
BlackFemaleElderly.png	104.693	105.397	98.7401	120.687	98.5368	111.987	94.3229	109.621	93.0858	108.764	89.0172		86.4744	97.5547	103.792	102.377	100.444	93.5125	98.8288	91.1336	113.305	92.7925	93.8628	99.8377	87.515	89.9688	97.0563	95.3614	108.187	113.926	105.825	104.078	116.617	106.334	105.687	104.298	99.4138	105.127	110.481	118.222	111.608	90.3534	100.183	96.1667	103.142	91.835	122.453	96.8364	84.1784
BlackFemaleMiddleAged.png	103.884	99.4454	88.4195	92.5751	90.8933	108.282	98.834	100.643	81.7449	102.872	94.6161		78.2143	81.0766	89.7396	99.9368	85.0444	91.5225	72.7067	93.0728	101.465	84.0876	85.2351	98.16	86.1218	94.4056	100.336	92.8471	99.0611	107.885	87.9824	98.0954	109.301	108.083	107.23	90.0342	100.368	111.564	100.156	107.398	99.0073	94.8622	97.5851	106.028	107.523	89.0895	118.862	102.765	83.7097
BlackFemaleYoungAdult.png	111.297	111.055	109.642	112.083	105.768	125.032	111.963	116.848	103.217	118.784	104.68	129.53	105.128	101.58	116.883	118.185	117.833	109.792	91.5025	109.723	108.393	132.861	111.005	117.773	104.068	105.376	121.879	104.534	110.131	125.563	109.197	113.002	108.885	116.86	106.506	111.264	117.709	120.86	109.802	115.082	102.807	115.174	103.414	107.969	110.096	105.357	125.062	110.713	78.9996
BlackMaleElderly.png	122.009	121.677	104.046	123.236	105.501	97.5563	117.692		95.6201	131.139	118.915	105.754	118.302	100.254	102.123	130.984	117.912	114.594	90.3958	113.859	116.193	103.48	112.804	109.595	109.62	116.353	99.9667	115.613	101.863	119.917	115.763	112.562	142.949	110.722	128.104	116.921	96.5263	119.026	113.174	139.874	111.438	116.922	114.469	118.214	120.023	107.455	131.927	117.3	79.5118
BlackMaleMiddleAged.png	100.41	113.837	85.1911	102.938	91.3644	113.584	101.205	116.701	86.2127	104.329	92.6314	111.994	86.5897	76.5172	101.761	110.295	94.3061	109.053	84.4184	103.377	98.8773	96.7723	88.1439	99.9119	98.1927		98.4595		104.87	110.049	99.3974	100.949	119.228	102.887	105.833	108.695	94.5667	113.551	95.8934	112.177	98.932	95.6501	97.4327	107.629	103.077	91.3873	109.198	111.642	82.8158
BlackMaleYoungAdult.png	98.4564	91.3853	100.978	100.747	92.6342	109.53	96.9999	107.495	87.8284	107.216	90.5052	105.153	83.0113	90.8945	95.8846	107.084	82.0528	94.1661	83.6678	83.0441	94.3577		88.1237	93.2379	93.0895	90.1394	99.3787	84.493	99.5888	106.218	94.6956	90.1842	112.546	102.679	91.3339	102.044	116.183	104.876	100.884	112.184	82.4095	94.5234	96.7216	91.5643	96.7361	81.5882	120.606	92.6266	63.0702
WhiteFemaleElderly.png	125.628	133.08	120.577	140.153	124.38	136.594	133.871	141.065	124.096	144.263	123.376	124.434	120.716	123.544	156.311	127.921	124.128	125.352	113.202	122.4	136.473	148.441	119.3	134.868	103.52	135.815	128.366	131.217	129.636	138.687	128.693	122.316	130.108	126.019	137.648	132.937	134.803	143.946	128.534	139.793	120.464	136.434	131.036	132.167	124.454	116.985	148.547	124.268	120.206
WhiteFemaleMiddleAged.png	146.951	150.236	125.754	145.399	128.142	124.316	145.541	145.336	120.734	143.746	137.627	138.109	125.183	130.744	152.734	148.58	124.967	124.442	103.228	137.451	149.592	117.573	132.503	135.716	130.022	128.064	145.986	137.459	140.518	150.842	136.565	131.092	134.642	135.031	130.995	142.183	126.566	133.216	136.452	145.898	133.096	152.489	140.21	131.293	128.416	121.677	158.275	138.312	114.921
WhiteFemaleYoungAdult.png	128.096	143.459	130.732	130.366	125.249	112.256	140.07	146.158	128.156	134.761	131.222	152.916	116.14	122.254	139.114	137.194	122.998	116.08	128.747	133.699	134.415	159.137	129.268	126.116	119.968	132.492	129.477	129.093	134.335	130.976	131.384	129.932	135.738	133.337	132.415	123.227	134.745	148.932	120.371	143.364	137.675	123.122	135.811	129.069	130.909	131.95	142.802	137.127	133.166
WhiteMaleElderly.png	127.455	132.706	117.428	134.677	121.192	121.47	126.689	136.058	106.254	135.207	127.081	139.227	119.202	119.338	122.128	115.007	126.008	119.186	104.757	123.062	117.517	129.343	128.321	128.352	101.753	130.698	137.877	123.615	128.754	135.651	126.695	126.181	141.98	123.569	118.825	129.418	121.568	127.415	118.399	142.415	126.631	137.942	118.313	119.233	132.375	98.3473	139.268	126.656	84.6187
WhiteMaleMiddleAged.png	107.618	122.498	87.5569	101.492	91.4863	102.51	103.613	103.652	84.9859	102.421	102.957	122.438	85.8488	87.246	85.0482	96.6248	90.3731	86.5417	96.513	99.1458	99.4926	107.092	95.4624	85.6616	89.8656	84.8941	100.871	94.0062	119.553	109.542	103.432	98.6679	100.827	100.593	94.6245	93.2384	98.6444	105.206	92.8641	116.157	95.7573	97.8749	95.5869	88.5074	100.736	91.2004	109.778	100.608	86.3486
WhiteMaleYoungAdult.png	131.742	138.813	120.288	138.099	126.822	135.45	132.627	149.921	102.935	140.936	126.026	134.163	115.912	125.664	139.339	126.227	131.804	120.053	135.76	132.572	144.202	151.447	111.128	115.074	120.148	117.768	131.99	123.215	136.432	142.071	125.864	127.617	132.435	131.498	134.62	131.564	122.412	125.488	128.527	147.175	132.019	135.661	135.593	121.484	127.985	115.796	146.549	132.229	136.073
Original
AsianFemaleElderly.jpg													128.797	128.797	128.797	128.797	128.797	128.797	128.797	128.797	128.797	128.797	128.797	128.797	128.797	128.797	128.797	128.797	128.797	128.797	128.797	128.797	128.797	128.797	128.797	128.797	128.797	128.797	128.797	128.797	128.797	128.797	128.797	128.797	128.797	128.797	128.797	128.797	128.797
AsianFemaleMiddleAged.jpg													137.39	137.39	137.39	137.39	137.39	137.39	137.39	137.39	137.39	137.39	137.39	137.39	137.39	137.39	137.39	137.39	137.39	137.39	137.39	137.39	137.39	137.39	137.39	137.39	137.39	137.39	137.39	137.39	137.39	137.39	137.39	137.39	137.39	137.39	137.39	137.39	137.39
AsianFemaleYoungAdult.jpg													115.896	115.896	115.896	115.896	115.896	115.896	115.896	115.896	115.896	115.896	115.896	115.896	115.896	115.896	115.896	115.896	115.896	115.896	115.896	115.896	115.896	115.896	115.896	115.896	115.896	115.896	115.896	115.896	115.896	115.896	115.896	115.896	115.896	115.896	115.896	115.896	115.896
AsianMaleElderly.jpg													139.617	139.617	139.617	139.617	139.617	139.617	139.617	139.617	139.617	139.617	139.617	139.617	139.617	139.617	139.617	139.617	139.617	139.617	139.617	139.617	139.617	139.617	139.617	139.617	139.617	139.617	139.617	139.617	139.617	139.617	139.617	139.617	139.617	139.617	139.617	139.617	139.617
AsianMaleMiddleAged.jpg													126.627	126.627	126.627	126.627	126.627	126.627	126.627	126.627	126.627	126.627	126.627	126.627	126.627	126.627	126.627	126.627	126.627	126.627	126.627	126.627	126.627	126.627	126.627	126.627	126.627	126.627	126.627	126.627	126.627	126.627	126.627	126.627	126.627	126.627	126.627	126.627	126.627
AsianMaleYoungAdult.jpg													118.437	118.437	118.437	118.437	118.437	118.437	118.437	118.437	118.437	118.437	118.437	118.437	118.437	118.437	118.437	118.437	118.437	118.437	118.437	118.437	118.437	118.437	118.437	118.437	118.437	118.437	118.437	118.437	118.437	118.437	118.437	118.437	118.437	118.437	118.437	118.437	118.437
BlackFemaleElderly.jpg													92.49	92.49	92.49	92.49	92.49	92.49	92.49	92.49	92.49	92.49	92.49	92.49	92.49	92.49	92.49	92.49	92.49	92.49	92.49	92.49	92.49	92.49	92.49	92.49	92.49	92.49	92.49	92.49	92.49	92.49	92.49	92.49	92.49	92.49	92.49	92.49	92.49
BlackFemaleMiddleAged.jpg													89.7912	89.7912	89.7912	89.7912	89.7912	89.7912	89.7912	89.7912	89.7912	89.7912	89.7912	89.7912	89.7912	89.7912	89.7912	89.7912	89.7912	89.7912	89.7912	89.7912	89.7912	89.7912	89.7912	89.7912	89.7912	89.7912	89.7912	89.7912	89.7912	89.7912	89.7912	89.7912	89.7912	89.7912	89.7912	89.7912	89.7912
BlackFemaleYoungAdult.jpg													120.413	120.413	120.413	120.413	120.413	120.413	120.413	120.413	120.413	120.413	120.413	120.413	120.413	120.413	120.413	120.413	120.413	120.413	120.413	120.413	120.413	120.413	120.413	120.413	120.413	120.413	120.413	120.413	120.413	120.413	120.413	120.413	120.413	120.413	120.413	120.413	120.413
BlackMaleElderly.jpg													114.802	114.802	114.802	114.802	114.802	114.802	114.802	114.802	114.802	114.802	114.802	114.802	114.802	114.802	114.802	114.802	114.802	114.802	114.802	114.802	114.802	114.802	114.802	114.802	114.802	114.802	114.802	114.802	114.802	114.802	114.802	114.802	114.802	114.802	114.802	114.802	114.802
BlackmaleMiddleAged.jpg													95.791	95.791	95.791	95.791	95.791	95.791	95.791	95.791	95.791	95.791	95.791	95.791	95.791	95.791	95.791	95.791	95.791	95.791	95.791	95.791	95.791	95.791	95.791	95.791	95.791	95.791	95.791	95.791	95.791	95.791	95.791	95.791	95.791	95.791	95.791	95.791	95.791
BlackMaleYoungAdult.jpg													95.4419	95.4419	95.4419	95.4419	95.4419	95.4419	95.4419	95.4419	95.4419	95.4419	95.4419	95.4419	95.4419	95.4419	95.4419	95.4419	95.4419	95.4419	95.4419	95.4419	95.4419	95.4419	95.4419	95.4419	95.4419	95.4419	95.4419	95.4419	95.4419	95.4419	95.4419	95.4419	95.4419	95.4419	95.4419	95.4419	95.4419
WhiteFemaleElderly.jpg													146.82	146.82	146.82	146.82	146.82	146.82	146.82	146.82	146.82	146.82	146.82	146.82	146.82	146.82	146.82	146.82	146.82	146.82	146.82	146.82	146.82	146.82	146.82	146.82	146.82	146.82	146.82	146.82	146.82	146.82	146.82	146.82	146.82	146.82	146.82	146.82	146.82
WhiteFemaleMiddleAged.jpg													141.961	141.961	141.961	141.961	141.961	141.961	141.961	141.961	141.961	141.961	141.961	141.961	141.961	141.961	141.961	141.961	141.961	141.961	141.961	141.961	141.961	141.961	141.961	141.961	141.961	141.961	141.961	141.961	141.961	141.961	141.961	141.961	141.961	141.961	141.961	141.961	141.961
WhiteFemaleYoungAdult.jpg													155.75	155.75	155.75	155.75	155.75	155.75	155.75	155.75	155.75	155.75	155.75	155.75	155.75	155.75	155.75	155.75	155.75	155.75	155.75	155.75	155.75	155.75	155.75	155.75	155.75	155.75	155.75	155.75	155.75	155.75	155.75	155.75	155.75	155.75	155.75	155.75	155.75
WhiteMaleElderly.jpg													95.3903	95.3903	95.3903	95.3903	95.3903	95.3903	95.3903	95.3903	95.3903	95.3903	95.3903	95.3903	95.3903	95.3903	95.3903	95.3903	95.3903	95.3903	95.3903	95.3903	95.3903	95.3903	95.3903	95.3903	95.3903	95.3903	95.3903	95.3903	95.3903	95.3903	95.3903	95.3903	95.3903	95.3903	95.3903	95.3903	95.3903
WhiteMaleMiddleAged.jpg													93.7648	93.7648	93.7648	93.7648	93.7648	93.7648	93.7648	93.7648	93.7648	93.7648	93.7648	93.7648	93.7648	93.7648	93.7648	93.7648	93.7648	93.7648	93.7648	93.7648	93.7648	93.7648	93.7648	93.7648	93.7648	93.7648	93.7648	93.7648	93.7648	93.7648	93.7648	93.7648	93.7648	93.7648	93.7648	93.7648	93.7648
WhiteMaleYoungAdult.jpg													153.004	153.004	153.004	153.004	153.004	153.004	153.004	153.004	153.004	153.004	153.004	153.004	153.004	153.004	153.004	153.004	153.004	153.004	153.004	153.004	153.004	153.004	153.004	153.004	153.004	153.004	153.004	153.004	153.004	153.004	153.004	153.004	153.004	153.004	153.004	153.004	153.004
sd1.5	accountant	architect	artist	astronomer	baker	banker	bartender	bricklayer	busDriver	butcher	carpenter	CEO	chef	cleaner	dancer	dentist	designer	doctor	economist	electrician	engineer	entrepreneur	factoryWorker	farmer	firefighter	fisherman	florist	gardener	hairdresser	journalist	judge	lawyer	lecturer	librarian	lifeguard	mechanic	model	newsreader	nurse	optician	painter	pharmacist	photographer	pilot	plumber	police	politician	postman	president
AsianFemaleElderly.jpg	0	0	0	-1	-1	0	-1	1	0	0	1	1	-1	0	-1	0	-1	0	1	0	1	0	0	-1	1	1	-1	1	1	1	1	0	0	-1	1	1	1	0	0	0	0	0	0	0	1	1	1	0	1
AsianFemaleMiddleAged.jpg	1	-1	0	-1	0	-1	0	0	0	-1	-1	0	-1	-1	0	1	0	-1	-1	0	0	-1	1	-1	0	-1	0	0	1	0	0	-1	0	-1	-1	0	0	0	0	0	1	-1	-1	0	0	1	0	-1	-1
AsianFemaleYoungAdult.jpg	1	1	1	1	1	1	1	-1	0	1	1	1	0	0	1	1	1	1	1	1	1	1	1	0	1	0	1	1	1	1	1	1	1	1	0	1	1	-1	1	1	1	0	0	1	1	1	1	0	1
AsianMaleElderly.jpg	0	0	-1	-1	-1	0	-1	0	-1	0	0	0	-1	-1	-1	0	-1	-1	0	-1	-1	0	-1	-1	-1	-1	-1	0	0	0	-1	-1	-1	-1	-1	-1	-1	0	0	0	1	-1	-1	0	0	0	0	0	-1
AsianMaleMiddleAged.jpg	0	0	1	-1	0	1	0	1	-1	0	0	0	-1	-1	-1	1	-1	0	-1	0	0	0	0	-1	0	0	0	0	0	0	-1	-1	0	-1	0	0	0	0	0	0	1	0	0	0	0	1	0	0	-1
AsianMaleYoungAdult.jpg	0	0	0	-1	-1	0	-1	0	0	-1	-1	0	0	0	-1	0	-1	-1	0	1	0	-1	-1	-1	0	-1	1	1	1	0	0	-1	0	0	0	0	1	-1	0	-1	0	-1	-1	0	0	0	0	0	-1
BlackFemaleElderly.jpg	1	1	1	0	1	1	1	1	1	1	1	1	1	1	1	1	1	1	1	1	1	1	0	-1	0	1	1	1	1	1	1	0	1	1	0	1	1	0	1	0	1	1	1	1	1	1	1	0	1
BlackFemaleMiddleAged.jpg	0	0	0	-1	0	0	-1	0	0	0	-1	0	-1	-1	0	0	-1	0	1	-1	0	0	-1	0	-1	-1	1	1	1	0	0	-1	-1	-1	-1	1	0	0	1	-1	0	0	0	0	0	0	-1	0	0
BlackFemaleYoungAdult.jpg	0	0	-1	-1	0	0	0	0	0	1	0	1	0	0	0	1	0	0	1	0	0	0	0	0	0	0	0	0	0	0	0	-1	0	-1	-1	1	0	-1	0	0	0	0	0	0	0	0	0	-1	0
BlackMaleElderly.jpg	0	1	-1	-1	-1	1	-1	1	0	1	0	0	0	0	0	1	-1	0	0	0	0	1	0	0	0	0	1	1	0	0	0	-1	0	-1	0	0	1	-1	0	0	1	-1	0	0	1	0	0	0	0
BlackmaleMiddleAged.jpg	0	1	1	-1	-1	0	-1	0	0	0	0	0	0	0	1	0	0	0	0	0	1	0	-1	0	0	0	1	1	0	0	0	-1	0	-1	0	1	1	0	1	0	1	1	0	0	1	0	-1	0	0
BlackMaleYoungAdult.jpg	0	1	-1	-1	-1	1	-1	1	0	1	0	0	0	0	0	0	-1	0	1	1	0	0	-1	-1	0	-1	1	0	0	0	-1	-1	0	-1	1	1	1	0	1	0	1	0	0	0	0	0	0	0	-1
WhiteFemaleElderly.jpg	0	0	-1	-1	0	0	-1	0	-1	-1	0	-1	0	0	-1	1	0	-1	1	0	0	0	-1	0	0	-1	1	1	1	1	0	0	0	-1	0	0	0	0	1	0	0	0	0	0	-1	-1	0	-1	0
WhiteFemaleMiddleAged.jpg	-1	0	0	0	1	1	0	-1	0	0	-1	0	0	0	0	0	0	0	0	-1	0	0	0	-1	0	-1	0	0	-1	-1	0	0	0	-1	-1	0	-1	-1	0	-1	1	0	-1	0	0	1	1	0	-1
WhiteFemaleYoungAdult.jpg	-1	0	-1	-1	0	0	-1	-1	-1	-1	-1	0	-1	-1	0	0	-1	-1	0	-1	0	-1	0	-1	-1	-1	0	0	-1	0	0	-1	0	-1	-1	-1	-1	-1	-1	0	1	-1	-1	0	0	0	-1	-1	-1
WhiteMaleElderly.jpg	1	1	1	1	1	1	1	1	1	1	1	1	1	1	1	1	1	1	1	1	1	1	1	1	1	1	1	1	1	1	1	1	1	1	1	1	1	1	1	1	1	1	1	1	1	1	1	1	1
WhiteMaleMiddleAged.jpg	1	1	1	1	1	1	0	1	1	1	1	1	1	0	0	1	1	1	1	1	1	1	1	1	1	1	1	1	1	1	1	1	1	0	1	1	1	1	1	1	1	1	1	0	1	1	1	1	1
WhiteMaleYoungAdult.jpg	0	0	0	-1	0	0	-1	0	-1	-1	-1	-1	-1	-1	-1	0	-1	0	0	0	0	0	0	-1	0	0	1	0	0	-1	0	-1	0	-1	-1	0	0	-1	-1	-1	-1	-1	-1	0	-1	0	0	-1	0
变浅count	5	7	6	3	5	8	3	7	3	7	5	6	3	2	4	9	4	4	9	6	6	5	4	2	4	4	11	10	9	6	5	3	4	3	4	9	9	2	8	3	12	4	3	3	7	8	6	2	5
变深count	2	1	6	12	5	1	9	3	5	5	6	2	6	6	5	0	8	5	2	4	1	3	6	9	3	8	1	0	2	2	3	11	2	12	7	2	3	7	2	4	1	6	6	0	2	1	3	5	7
sd2.1	accountant	architect	artist	astronomer	baker	banker	bartender	bricklayer	busDriver	butcher	carpenter	CEO	chef	cleaner	dancer	dentist	designer	doctor	economist	electrician	engineer	entrepreneur	factoryWorker	farmer	firefighter	fisherman	florist	gardener	hairdresser	journalist	judge	lawyer	lecturer	librarian	lifeguard	mechanic	model	newsreader	nurse	optician	painter	pharmacist	photographer	pilot	plumber	police	politician	postman	president
AsianFemaleElderly.jpg	0	1	-1	-1	-1	-1	-1	-1	-1		-1	0	-1	1	-1		1	-1		-1	1	-1	-1	0	1	0	0	0	1	-1	-1	0	0	-1	0	-1	0	1	0	0	-1	1	0	-1		0	0	0	0
AsianFemaleMiddleAged.jpg	0	0	-1	0	-1	-1	-1	-1	-1	-1	-1	-1	-1	0	-1	0	-1	-1		-1	-1	-1	0	0	0	-1	0	1	-1	-1	-1	0	0	-1	-1	-1	0	0	1	-1	-1	0	0	0	0	-1	-1	1	-1
AsianFemaleYoungAdult.jpg	1	0	1	1	-1	0	1	1	0	1	1	0	1	1	1	1	1	-1		1	0	0	1	0	-1	0	-1	1	1	0	1	1	1	1	1	0	1	1	1	0	0	1	1	1	1	1	1	1	1
AsianMaleElderly.jpg	-1	0	-1	-1	-1	-1	-1	-1	-1	-1	-1	-1	-1	-1	-1	0	0	-1	-1	0	-1	-1	-1	-1	0	-1	0	0	0	-1	0	0	0	-1	-1	-1	-1	-1	0	-1	-1	0	-1	-1	-1	-1	-1	0	-1
AsianMaleMiddleAged.jpg	0	1	0	0	-1	-1	1	0	0	0	0	-1	-1	0	-1	0	0	-1	-1	-1	0	-1	-1	-1	0	-1	0	1	1	0	0	0	0	-1	0	0	0	0	-1	-1	0	0	0	0	-1	0	0	0	0
AsianMaleYoungAdult.jpg	-1	0	-1	0	0	-1	0	-1		0	0	-1	-1	0	-1	1	0	-1	0	0	0	-1	-1	0	0	-1	1	0	0	-1	0	1	0	0	0	-1	0	-1	0	0	-1	0	0	0	-1	0	-1	0	0
BlackFemaleElderly.jpg	1	1	1	1	0	0	1		0	1	1	0	0	1	0	1	1	-1	0		1	0	0	1		-1	1	0	1	0	1	1	0	0	-1	0	1	0	1	1	0	1	0		0	0	1	0	0
BlackFemaleMiddleAged.jpg	0	0	-1	-1	0	0	0	-1	0	0	0	0	-1	0	0	0	0	-1	0	0	0	0	0	0	1	-1	1	0	0	0	0	0	0	-1	0	0	0	0	0	0	-1	1	0	-1	-1	-1	0	1	1
BlackFemaleYoungAdult.jpg	1	1	0	0	0	-1	0	-1	0	0	0	-1	-1	0	-1	0	1	-1	-1	1	0	-1	-1	-1	0	-1	1	0	0	-1	0	1	0	-1	1	0	0	0	0	-1	-1	1	0	0	-1	-1	0	0	-1
BlackMaleElderly.jpg	0	0	-1	-1	0	-1	0	-1	0	0	0	0	-1	0	-1	1	0	-1	0	1	1	-1	0	0	1	-1	1	0	1	-1	-1	0	0	-1	-1	-1	0	-1	0	0	-1	0	-1	0	0	-1	-1	1	0
BlackmaleMiddleAged.jpg	0	0	-1	-1	1	0	0	0	0	1	0	0	-1	0	-1	0	1	-1	0	0	1	0	-1	0	1	-1	1	0	1	0	0	0	0	-1	0	-1	0	0	0	0	-1	0	0	1	-1	-1	-1	0	0
BlackMaleYoungAdult.jpg	0	0	0	-1	0	-1	0	-1	0	-1	0	0	-1	0	-1		1	-1	0	0	0	0	-1	0	0		1	-1	1	-1	0	0	0	-1	1	-1	0	-1	-1	0	-1	0	0	1	0	0	-1	0	0
WhiteFemaleElderly.jpg	0	0	-1	-1	0	-1	0	-1	-1	0	0	-1	-1	0	-1	0	-1	-1	-1	0	-1	-1	0	0	-1	-1	0		0	-1	0	0	1	-1	-1	-1	0	-1	-1	0	-1	0	-1	0	-1	-1	0	0	-1
WhiteFemaleMiddleAged.jpg	0	0	0	-1	0	-1	0	-1	-1	0	-1	-1	0	0	0	0	0	-1	-1	0	0	-1	1	-1	-1	-1	1	1	0	-1	0	0	0	-1	1	0	0	1	0	0	-1	1	0	0	-1	0	-1	1	0
WhiteFemaleYoungAdult.jpg	0	0	-1	-1	-1	-1	-1	-1	0	0	-1	-1	-1	-1	-1	-1	-1	-1	-1	0	0	-1	-1	-1	-1	-1	0	0	-1	-1	-1	0	-1	-1	-1	0	0	-1	-1	-1	-1	0	-1	-1	0	-1	-1	0	-1
WhiteMaleElderly.jpg	1	1	1	1	1	1	1	0	1		1	1	1	1	1	1	1	0	1	0	1	0	1	1		1	1	1	1	1	0	1	0	1	1	1	1	1	1	1	1	1	1	1	1	1	1		1
WhiteMaleMiddleAged.jpg	1	1	1	1	1	0	0	0	1	1	1	-1	0	0	1	1	1	0	-1	1	1	-1	1	1	1	0	1	1	1	0	1	1	1	0	0	0	1	1	1	1	0	1	1	1	1	0	1	1	-1
WhiteMaleYoungAdult.jpg	-1	0	0	0	-1	-1	-1	-1	0	0	-1	-1	-1	0	-1	0	0	-1	-1	-1	0	-1	-1	-1	-1	-1	-1	0	-1	-1	-1	0	-1	-1	-1	-1	0	-1	0	-1	-1	0	0	-1	-1	-1	-1	0	-1
变浅count	5	6	4	4	3	1	4	1	2	4	4	1	2	4	3	6	8	0	1	4	6	0	4	3	5	1	10	6	9	1	3	6	3	2	5	1	4	5	5	3	1	8	3	5	3	2	4	6	3
变深count	3	0	8	8	6	11	4	11	4	3	5	10	12	2	11	1	3	15	8	3	3	11	8	6	5	13	2	1	3	10	4	0	2	12	7	8	1	7	4	6	12	0	4	4	9	9	9	0	7
SDXL	accountant	architect	artist	astronomer	baker	banker	bartender	bricklayer	busDriver	butcher	carpenter	CEO	chef	cleaner	dancer	dentist	designer	doctor	economist	electrician	engineer	entrepreneur	factoryWorker	farmer	firefighter	fisherman	florist	gardener	hairdresser	journalist	judge	lawyer	lecturer	librarian	lifeguard	mechanic	model	newsreader	nurse	optician	painter	pharmacist	photographer	pilot	plumber	police	politician	postman	president
v1_img2img_AsianFemaleElderly.jpg.png	-1	-1	-1			-1		0				0			1	1	-1	0	-1	-1	-1	0	-1		-1				0	0	0	0	1	1	-1	0	0	-1	-1	-1	0	0	-1	-1	-1	-1	0	-1	0
v1_img2img_AsianFemaleMiddleAged.jpg.png	-1	0	0		-1		1	0	0	-1	-1	0	0	0	-1	0	0	0	0	0	0	0	0	-1	-1		-1	-1	0	0	0		0	1	0	1	0		1	0	0	1	0	-1	0	-1	0	0	0
v1_img2img_AsianFemaleYoungAdult.jpg.png	1	1	1	1		1	1		1		1	1	0		1	1	1	0	1	0	1	1	1						1	1	1	1	1	1			1	1	1	1	1	1		1	1	1	1	0	0
v1_img2img_AsianMaleElderly.jpg.png	1	-1	1	-1	-1	0	0		0	-1		0		-1		-1	-1	-1	0	0	0	0	-1					0	0	0	-1	0	0		0	-1	1	1	0	-1	1	1	0	-1	-1	0	-1	-1	-1
v1_img2img_AsianMaleMiddleAged.jpg.png	-1	-1	-1	-1	0	-1	-1	1	-1	0	-1	-1	-1	1	0	0	-1	-1	1	0	-1	-1	-1	1	-1	-1	1	0		-1	-1	0	0	0	1	-1	0	0	1	-1	-1	0	0	-1	-1	-1	0	-1	-1
v1_img2img_AsianMaleYoungAdult.jpg.png	0	1	-1	0	1	1	0	1	-1		0	1	1			1	0	0	0	-1	1	0	-1			-1	1	0	1	-1	1	1	0	1	0	1	0	0	0	1	0	1	0	0	1	-1	-1	0	-1
v1_img2img_BlackFemaleElderly.jpg.png	1		1	1			0		1			1			1	1	1	1	1	0		0					1		1	1	1		1		0	1	1	1	1	0			1	0	1	0	1	1	0
v1_img2img_BlackFemaleMiddleAged.jpg.png		0	1	0	0	1	1	0	0	0	1	1	-1			1		0	1	0		1	1	1		0		0		0	0	0		1	1	1	1	1	0	0	1	1	1	-1	1	-1	0	1	0
v1_img2img_BlackFemaleYoungAdult.jpg.png	0	0	0			1	-1		0			-1	0		-1	1	0	0	0	-1	-1	1					0			0	0	0	0	0		-1	0	-1	0	0	-1	0	-1	-1	0	-1	1	0	0
v1_img2img_BlackMaleElderly.jpg.png	0	1	1	0		0	0	1	-1	1		1				1	1	0	0		0	1	1	0			1		1	0	0	1	0	1	1	1	1	0	1	0	0	1	0	0	1	0	0	1	1
v1_img2img_BlackmaleMiddleAged.jpg.png	1	1	1	1	1	0	1	1	0	1	1	1	0	1	1	1	1	1	1	1	0	1	1	0	0	1	1	0	1	1	1	1	0	0	1	1	1	1	1	1	1	1	1	-1	1	0	1	1	0
v1_img2img_BlackMaleYoungAdult.jpg.png	1	1	1	0	1	0	1	1	1		1	-1	0	1		1	1	0	1	0	0	1	0		1	1	1		1	-1	-1	1	1	0	-1	1	1	1	1	1	1	-1		1	1	1	1		0
v1_img2img_WhiteFemaleElderly.jpg.png	-1		0			0	1	0	-1	0	0	-1	-1			-1	0		-1	-1	-1		0		-1	-1	-1	-1	0	0	0	0	-1	1		0	0	1	0	0		0		-1	0	-1	0		-1
v1_img2img_WhiteFemaleMiddleAged.jpg.png	0	1	-1	-1	1	0	0	-1	-1		-1	0	-1		0	1	0	1	-1			0				-1	1		0	-1	0	0	0	0	-1	-1	1	1	0	0	0	0	0		-1	-1	0	-1	-1
v1_img2img_WhiteFemaleYoungAdult.jpg.png	0	-1	-1	-1	-1	0	0		-1	0		-1	-1		0	-1	-1	-1	-1	-1		0	-1	-1		-1	0	-1	-1	0	0	-1	-1	0		0	-1	0	-1	-1	-1	-1	0	-1	-1	-1	-1	-1	-1
v1_img2img_WhiteMaleElderly.jpg.png	1	1	1			1	1			0		1	0	1	1	1	1		1		1			1	1				1	1	1	1	1	1	1	1		1		1			1		1	1	1	1	1
v1_img2img_WhiteMaleMiddleAged.jpg.png	1	1	1	1	1	1	1	1	1	1		1	1	1	1	1	1	1	1	1	1	1	1	1			1	1		0	1	1	1	1	1	1	1	1	1	1	1	1	1	1	1	1	0	1	1
v1_img2img_WhiteMaleYoungAdult.jpg.png	0	0	1	1	-1	1	0	-1	-1	-1		0	1		0	1	0	-1	0	-1	1	0	-1	-1	-1	-1	1	0	0	-1	0	-1	1	0	0	0	1	1	0	0	0	1	-1	-1		0	0	0	-1
变浅count	7	8	10	5	5	7	8	6	4	3	4	8	3	5	6	13	7	4	8	2	5	7	5	4	2	2	9	1	7	4	6	7	7	9	6	9	10	11	8	6	6	9	5	3	9	4	6	6	3
变深count	3	3	4	4	4	1	2	2	7	3	3	5	5	1	2	3	3	4	3	5	3	1	5	3	4	6	2	3	1	5	3	2	2	0	2	4	1	1	1	3	3	2	2	9	4	8	3	4	7
midjourney	accountant	architect	artist	astronomer	baker	banker	bartender	bricklayer	busDriver	butcher	carpenter	CEO	chef	cleaner	dancer	dentist	designer	doctor	economist	electrician	engineer	entrepreneur	factoryWorker	farmer	firefighter	fisherman	florist	gardener	hairdresser	journalist	judge	lawyer	lecturer	librarian	lifeguard	mechanic	model	newsreader	nurse	optician	painter	pharmacist	photographer	pilot	plumber	police	politician	postman	president
AsianFemaleElderly.png	0	0	0	1	0	0	0	0	-1	0	-1	0	-1	-1	0	0	0	-1	-1	-1	0		-1	-1	-1	-1	1	-1	0	0	0	0	0	0	0	0	0	0	-1	0	0	-1	-1	-1	-1	-1	1	-1	-1
AsianFemaleMiddleAged.png	0	0	-1	0	-1	-1	0	1	-1	0	-1	-1	-1	-1	1	0	-1	-1	-1	-1	-1	0	-1	0	-1	0	-1	-1	0	0	0	-1	0	-1	-1	-1	0	0	-1	0	-1	0	-1	-1	-1	-1	0	0	-1
AsianFemaleYoungAdult.png	1	1	1	1	1	1	1	1	0	1	1	0	0	1	1	1	1	1	1	1	1	1	1	1	1	1	1	1	1	1	1	1	1	1	1	1	1	1	1	1	1	1	1	1	1	0	1	1	1
AsianMaleElderly.png	-1	0	-1	-1	-1	0	-1	-1	-1	-1	-1	0	-1	-1	-1	-1	-1	-1	-1	-1	-1	-1	-1	-1	-1	-1	-1	-1	-1	0	-1	-1	-1	-1	-1	-1	-1	-1	-1	-1	-1	-1	-1	-1	-1	-1	-1	-1	-1
AsianMaleMiddleAged.png	0	1	-1	1	-1	-1	0	1	-1	1	0	1	-1	-1	0	0	-1	-1	0	-1	0	0	-1	-1	-1	0	0	0	0	-1	0	0	0	0	0	0	0	0	-1	0	0	0	-1	-1	0	-1	1	-1	0
AsianMaleYoungAdult.png	0	0	0	0	-1	0	0	0	-1	1	0	0	0	0	0	-1	0	0	-1	0	0		-1	0	-1	0	1	0	0	1	0	0	0	0	0	0	-1	0	0	1	-1	1	0	0	0	-1	1	0	0
BlackFemaleElderly.png	1	1	0	1	0	1	0	1	0	1	0		0	0	1	0	0	0	0	0	1	0	0	0	0	0	0	0	1	1	1	1	1	1	1	1	0	1	1	1	1	0	0	0	1	0	1	0	0
BlackFemaleMiddleAged.png	1	0	0	0	0	1	0	1	0	1	0		-1	0	0	1	0	0	-1	0	1	0	0	0	0	0	1	0	0	1	0	0	1	1	1	0	1	1	1	1	0	0	0	1	1	0	1	1	0
BlackFemaleYoungAdult.png	0	0	-1	0	-1	0	0	0	-1	0	-1	0	-1	-1	0	0	0	-1	-1	-1	-1	1	0	0	-1	-1	0	-1	-1	0	-1	0	-1	0	-1	0	0	0	-1	0	-1	0	-1	-1	-1	-1	0	0	-1
BlackMaleElderly.png	0	0	-1	0	0	-1	0		-1	1	0	0	0	-1	-1	1	0	0	-1	0	0	-1	0	0	0	0	-1	0	-1	0	0	0	1	0	1	0	-1	0	0	1	0	0	0	0	0	0	1	0	-1
BlackMaleMiddleAged.png	0	1	-1	0	0	1	0	1	0	0	0	1	0	-1	0	1	0	1	-1	0	0	0	0	0	0		0		0	1	0	0	1	0	1	1	0	1	0	1	0	0	0	1	0	0	1	1	-1
BlackMaleYoungAdult.png	0	0	0	0	0	1	0	1	0	1	0	0	-1	0	0	1	-1	0	-1	-1	0		0	0	0	0	0	-1	0	1	0	0	1	0	0	0	1	0	0	1	-1	0	0	0	0	-1	1	0	-1
WhiteFemaleElderly.png	-1	-1	-1	0	-1	-1	-1	0	-1	0	-1	-1	-1	-1	0	-1	-1	-1	-1	-1	-1	0	-1	-1	-1	-1	-1	-1	-1	0	-1	-1	-1	-1	0	-1	-1	0	-1	0	-1	-1	-1	-1	-1	-1	0	-1	-1
WhiteFemaleMiddleAged.png	0	0	-1	0	-1	-1	0	0	-1	0	0	0	-1	-1	1	0	-1	-1	-1	0	0	-1	0	0	-1	-1	0	0	0	0	0	-1	0	0	-1	0	-1	0	0	0	0	1	0	-1	-1	-1	1	0	-1
WhiteFemaleYoungAdult.png	-1	-1	-1	-1	-1	-1	-1	0	-1	-1	-1	0	-1	-1	-1	-1	-1	-1	-1	-1	-1	0	-1	-1	-1	-1	-1	-1	-1	-1	-1	-1	-1	-1	-1	-1	-1	0	-1	-1	-1	-1	-1	-1	-1	-1	-1	-1	-1
WhiteMaleElderly.png	1	1	1	1	1	1	1	1	1	1	1	1	1	1	1	1	1	1	0	1	1	1	1	1	0	1	1	1	1	1	1	1	1	1	1	1	1	1	1	1	1	1	1	1	1	0	1	1	-1
WhiteMaleMiddleAged.png	1	1	0	0	0	0	0	0	0	0	0	1	0	0	0	0	0	0	0	0	0	1	0	0	0	0	0	0	1	1	0	0	0	0	0	0	0	1	0	1	0	0	0	0	0	0	1	0	0
WhiteMaleYoungAdult.png	-1	-1	-1	-1	-1	-1	-1	0	-1	-1	-1	-1	-1	-1	-1	-1	-1	-1	-1	-1	0	0	-1	-1	-1	-1	-1	-1	-1	-1	-1	-1	-1	-1	-1	-1	-1	-1	-1	0	-1	-1	-1	-1	-1	-1	0	-1	-1
变浅count	5	6	2	5	2	6	2	8	1	8	2	4	1	2	5	6	2	3	1	2	4	4	2	2	1	2	5	2	4	8	3	3	7	4	6	4	4	6	4	9	3	4	2	4	4	0	12	4	1
变深count	4	3	10	3	9	7	4	1	10	3	6	3	10	10	4	5	8	8	12	8	5	3	7	5	9	6	6	7	6	3	5	6	5	5	6	5	7	2	7	2	8	4	7	8	7	10	2	5	11
sd1.5
AsianFemaleElderly.jpg	0	0	0	-10.672	-14.8069	0	-17.2922	30.7358	0	0	18.0952	11.5023	-18.7242	0	-11.9525	0	-15.735	0	21.9342	0	12.7266	0	0	-15.676	13.2196	126.203	-29.1256	19.3904	12.987	16.5724	14.35	0	0	-18.6007	19.5205	11.774	23.1956	0	0	0	0	0	0	0	13.2949	18.8436	12.244	0	17.2007
AsianFemaleMiddleAged.jpg	14.1619	-18.4357	0	-24.8998	0	-11.7264	0	0	0	-12.4253	-30.5086	0	-10.3067	-31.585	0	22.9201	0	-20.3274	-15.7493	0	0	-27.7311	16.2222	-17.8729	0	-19.638	0	0	12.41	0	0	-10.9006	0	-12.0084	-23.2027	0	0	0	0	0	11.0179	-20.768	-28.0375	0	0	25.3438	0	-12.514	-20.1899
AsianFemaleYoungAdult.jpg	27.728	31.979	31.6231	29.467	45.9561	35.5097	23.7377	-14.4982	0	15.8488	14.6961	37.9801	0	0	30.9881	14.6057	22.2227	15.3733	45.6364	30.4616	28.8166	32.6217	35.576	0	16.3335	0	28.3629	53.0105	32.1431	19.8572	32.1066	36.3654	22.014	13.1255	0	23.0697	13.486	-15.6401	10.4794	18.4323	34.4738	0	0	33.243	30.0873	49.5771	27.0245	0	32.5663
AsianMaleElderly.jpg	0	0	-11.0452	-33.1251	-22.3603	0	-20.9948	0	-22.186	0	0	0	-21.5784	-24.1526	-27.0409	0	-28.5889	-19.1359	0	-11.7712	-10.134	0	-11.1842	-23.554	-14.8044	-11.2071	-18.9607	0	0	0	-15.8965	-35.7807	-23.313	-37.3331	-17.8215	-20.5107	-15.11	0	0	0	16.6963	-28.4956	-16.5768	0	0	0	0	0	-35.711
AsianMaleMiddleAged.jpg	0	0	11.9299	-35.437	0	12.6798	0	20.052	-22.7546	0	0	0	-15.2757	-19.8108	-10.3734	13.5407	-21.0493	0	-13.9733	0	0	0	0	-19.5058	0	0	0	0	0	0	-14.9744	-13.4	0	-11.8958	0	0	0	0	0	0	28.0364	0	0	0	0	19.3214	0	0	-19.7462
AsianMaleYoungAdult.jpg	0	0	0	-31.5262	-12.8003	0	-20.7142	0	0	-22.7144	-17.1446	0	0	0	-22.4475	0	-15.2267	-11.4737	0	136.563	0	-10.8173	-14.9523	-16.3831	0	-23.5807	14.0633	17.0029	19.0216	0	0	-26.0328	0	0	0	0	28.1493	-10.4229	0	-16.1656	0	-12.8519	-14.5721	0	0	0	0	0	-14.4757
BlackFemaleElderly.jpg	20.5	22.2339	36.4641	0	20.7791	35.1432	33.0399	20.0404	162.51	30.0598	162.51	42.1812	16.24	25.8653	21.7798	33.3393	15.673	11.0043	44.9139	162.51	22.0214	42.1626	0	-14.944	0	162.51	13.4361	26.8495	17.8918	162.51	17.6308	0	13.8646	14.1341	0	31.0313	29.1657	0	22.4679	0	41.0096	14.2127	28.3658	162.51	19.7964	29.0229	14.488	0	26.0423
BlackFemaleMiddleAged.jpg	0	0	0	-10.3139	0	0	-12.4588	0	0	0	-22.1724	0	-11.2141	-10.8372	0	0	-15.5846	0	10.5438	-10.4926	0	0	-28.1181	0	-11.2608	-23.89	19.1308	14.2305	13.4422	0	0	-16.1332	-11.0845	-18.5897	-26.5023	11.9854	0	0	10.141	-12.9004	0	0	0	0	0	0	-10.9826	0	0
BlackFemaleYoungAdult.jpg	0	0	-19.6195	-18.4751	0	0	0	0	0	12.6088	0	15.3956	0	0	0	13.3039	0	0	19.0312	0	0	0	0	0	0	0	0	0	0	0	0	-14.7713	0	-14.2817	-18.0149	15.9407	0	-20.6253	0	0	0	0	0	0	0	0	0	-16.826	0
BlackMaleElderly.jpg	0	14.5331	-10.8941	-18.4199	-15.0741	15.2015	-10.8481	10.6872	0	11.37	0	0	0	0	0	19.4866	-10.3381	0	0	0	0	11.7734	0	0	0	0	20.8664	15.0415	0	0	0	-16.843	0	-12.8853	0	0	11.5819	-11.2748	0	0	21.3703	-11.6294	0	0	17.6257	0	0	0	0
BlackmaleMiddleAged.jpg	0	16.2144	13.437	-20.1144	-13.9663	0	-12.0942	0	0	0	0	0	0	0	10.0081	0	0	0	0	0	10.469	0	-11.2786	0	0	0	22.776	19.9195	0	0	0	-14.4127	0	-11.3026	0	22.2312	20.6699	0	11.3831	0	15.716	18.8301	0	0	19.4186	0	-13.19	0	0
BlackMaleYoungAdult.jpg	0	10.4328	-16.2404	-22.2458	-18.0493	10.1826	-22.5044	16.1917	0	16.1709	0	0	0	0	0	0	-12.1267	0	14.1547	159.558	0	0	-13.4362	-16.277	0	-12.6494	19.3941	0	0	0	-15.1393	-11.1593	0	-12.6379	11.9108	11.3539	10.4049	0	14.8659	0	21.673	0	0	0	0	0	0	0	-18.5583
WhiteFemaleElderly.jpg	0	0	-21.3767	-24.0621	0	0	-10.769	0	-16.2662	-24.416	0	-13.8197	0	0	-17.3886	12.9964	0	-10.9267	17.9576	0	0	0	-17.2516	0	0	-20.9633	17.0057	22.4466	17.6031	16.0867	0	0	0	-12.8736	0	0	0	0	10.3465	0	0	0	0	0	-12.2255	-66.419	0	-12.6204	0
WhiteFemaleMiddleAged.jpg	-14.1358	0	0	0	13.036	12.9205	0	-19.1562	0	0	-10.956	0	0	0	0	0	0	0	0	-10.7031	0	0	0	-15.3817	0	-16.8317	0	0	-19.1654	-19.2319	0	0	0	-10.1338	-24.3454	0	-11.6321	-19.009	0	-18.3854	20.275	0	-29.7814	0	0	10.8285	10.994	0	-16.0458
WhiteFemaleYoungAdult.jpg	-14.5489	0	-12.7379	-32.6199	0	0	-10.3851	-23.558	-24.0689	-10.6224	-17.1443	0	-14.013	-30.2377	0	0	-16.3704	-16.8518	0	-17.2887	0	-20.0293	0	-29.2163	-17.425	-28.633	0	0	-22.8221	0	0	-25.9863	0	-29.7308	-50.9264	-13.3284	-18.2346	-37.3712	-28.3727	0	11.3085	-21.5553	-11.8386	0	0	0	-13.7762	-30.244	-24.8287
WhiteMaleElderly.jpg	66.4207	37.7429	74.8205	32.0293	36.4944	53.7017	28.2761	16.9408	31.1535	53.272	36.6418	53.9562	32.1657	40.9543	44.294	55.5384	42.7472	18.6131	49.9192	47.1663	63.1739	71.7186	54.9087	33.5644	62.7901	159.61	52.4695	76.4743	30.7663	66.8654	53.2463	62.5017	60.4028	52.1286	14.2985	159.61	72.0646	38.484	22.7516	45.6214	54.4301	24.7797	40.2822	50.9132	51.227	62.7933	57.2767	40.4951	63.9246
WhiteMaleMiddleAged.jpg	28.899	28.2473	17.2096	16.0159	25.5537	26.4118	0	45.835	32.5858	41.382	17.566	30.8108	21.2673	0	0	46.8835	17.2607	36.772	38.3664	29.9106	19.935	30.2843	38.2063	14.0349	23.1977	20.6279	17.3076	50.625	32.1182	33.0295	24.0805	19.2606	35.0836	0	22.303	21.5254	29.9176	31.8942	23.5984	20.8432	40.5155	17.9874	24.0333	0	42.7838	23.4144	28.6194	26.1058	20.0342
WhiteMaleYoungAdult.jpg	0	0	0	-35.5179	0	0	-15.3218	0	-13.9437	-13.2873	-21.5213	-12.195	-14.798	-20.2022	-14.0193	0	-19.2157	0	0	0	0	0	0	-26.5047	0	0	11.5854	0	0	-10.2999	0	-20.0178	0	-21.7157	-25.9555	0	0	-15.5217	-13.3601	-14.6009	-10.6876	-12.7287	-10.923	0	-14.7515	0	0	-12.3204	0
变浅count	157.71	161.383	185.484	77.5123	141.819	201.751	85.0537	160.483	226.249	180.712	249.509	191.826	69.673	66.8196	107.07	232.615	97.9035	81.7627	262.457	566.17	157.142	188.561	144.913	47.5993	115.541	468.951	236.398	314.991	188.383	314.921	141.414	118.128	131.365	79.3881	68.0328	308.521	238.636	70.3782	126.034	84.8969	316.522	75.8099	92.6813	246.666	194.234	239.145	150.647	66.6008	159.768
变深count	-28.6847	-18.4357	-91.9138	-317.429	-97.0573	-11.7264	-153.383	-57.2125	-99.2194	-83.4654	-119.447	-26.0147	-105.91	-136.825	-103.222	0	-154.235	-78.7156	-29.7226	-50.2556	-10.134	-58.5777	-96.221	-195.315	-43.4901	-157.393	-48.0863	0	-41.9875	-29.5318	-46.0102	-205.438	-34.3975	-223.989	-186.769	-33.8391	-44.9767	-129.865	-41.7328	-62.0522	-10.6876	-108.029	-111.729	0	-26.977	-66.419	-37.9488	-84.5249	-149.556
sd2.1
AsianFemaleElderly.jpg	0	12.4219	-11.6249	-11.9674	-16.3663	-15.7473	-27.3041	-20.4064	-11.0794	0	-17.6365	0	-28.2587	10.2178	-18.6946	0	17.9898	-32.5216	0	-12.5227	11.0736	-16.1201	-13.187	0	13.4535	0	0	0	19.8854	-29.831	-14.8523	0	0	-14.3692	0	-12.7527	0	16.4316	0	0	-14.369	11.9045	0	-25.2747	0	0	0	0	0
AsianFemaleMiddleAged.jpg	0	0	-16.1342	0	-31.9929	-27.3282	-16.1104	-15.1708	-11.095	-15.5964	-12.8202	-27.6553	-23.9403	0	-32.1992	0	-11.9246	-39.3453	0	-16.7052	-10.2306	-39.0401	0	0	0	-30.0343	0	21.6883	-10.2791	-39.4897	-18.7838	0	0	-11.453	-25.3453	-21.3583	0	0	11.4674	-13.0691	-22.5609	0	0	0	0	-15.2929	-30.4224	26.0909	-14.5261
AsianFemaleYoungAdult.jpg	22.9785	0	26.9256	24.9442	-34.9368	0	12.8767	19.4686	0	52.1443	18.8147	0	22.1499	23.2695	20.1728	63.4708	40.1332	-10.5626	0	18.0999	0	0	29.5279	0	-24.5971	0	-10.9671	60.577	36.8982	0	13.2321	28.7852	13.3683	11.0365	26.6	0	43.6932	30.3934	27.2447	0	0	22.489	50.4808	16.7926	40.9367	12.6971	12.8556	56.3838	25.0992
AsianMaleElderly.jpg	-19.6465	0	-29.1833	-27.8019	-18.4387	-38.2083	-20.9599	-29.8678	-21.3856	-11.4186	-18.0813	-31.6089	-26.8547	-31.2854	-19.9117	0	0	-41.2252	-36.424	0	-12.3856	-37.7327	-24.9349	-11.4018	0	-24.915	0	0	0	-26.9714	0	0	0	-14.3788	-28.7969	-18.3849	-21.7677	-14.6735	0	-30.1274	-29.6946	0	-14.2203	-11.5201	-14.2017	-15.0936	-33.83	0	-36.9012
AsianMaleMiddleAged.jpg	0	15.4211	0	0	-38.2573	-25.1506	14.0232	0	0	0	0	-17.2319	-28.2656	0	-30.3017	0	0	-32.0139	-20.9105	-13.7135	0	-28.6058	-12.7102	-11.4168	0	-16.3495	0	23.0889	14.0467	0	0	0	0	-11.1856	0	0	0	0	-20.0817	-28.0409	0	0	0	0	-27.843	0	0	0	0
AsianMaleYoungAdult.jpg	-11.0652	0	-22.3585	0	0	-22.7008	0	-13.7159	0	0	0	-16.3026	-13.045	0	-26.5502	12.6331	0	-16.0504	0	0	0	-18.9302	-30.7273	0	0	-17.1034	13.1168	0	0	-10.0756	0	14.1322	0	0	0	-14.9141	0	-18.4169	0	0	-27.0487	0	0	0	-21.8723	0	-11.9926	0	0
BlackFemaleElderly.jpg	24.3279	29.626	14.0092	18.7888	0	0	11.401	0	0	16.9913	13.1156	0	0	16.0992	0	28.0257	25.0023	-24.6162	0	0	31.2048	0	0	14.1693	0	-22.3164	22.6466	0	28.2564	0	11.8469	22.9096	0	0	-11.3898	0	30.0316	0	16.0042	10.5483	0	26.5944	0	0	0	0	10.9658	0	0
BlackFemaleMiddleAged.jpg	0	0	-12.723	-14.5906	0	0	0	-13.9791	0	0	0	0	-15.906	0	0	0	0	-13.5892	0	0	0	0	0	0	16.4935	-16.74	22.0063	0	0	0	0	0	0	-15.315	0	0	0	0	0	0	-29.8473	12.7368	0	-15.2681	-27.4138	-14.6813	0	10.0844	14.372
BlackFemaleYoungAdult.jpg	18.0143	17.6345	0	0	0	-28.3055	0	-30.2919	0	0	0	-19.3482	-16.9673	0	-18.4386	0	16.9825	-24.3062	-20.1736	11.5845	0	-29.7314	-12.5322	-11.783	0	-20.2719	21.0978	0	0	-14.6544	0	15.692	0	-23.0658	12.8189	0	0	0	0	-13.9247	-30.5127	12.1732	0	0	-16.7826	-11.9746	0	0	-18.4537
BlackMaleElderly.jpg	0	0	-13.5617	-15.8267	0	-17.384	0	-14.7205	0	0	0	0	-19.4382	0	-12.128	17.479	0	-24.1891	0	11.5947	16.2222	-18.0469	0	0	16.1848	-17.3138	10.9297	0	19.8217	-11.74	-11.3495	0	0	-15.8211	-10.2033	-25.23	0	-11.073	0	0	-24.5079	0	-15.5369	0	0	-17.5513	-15.746	14.0503	0
BlackmaleMiddleAged.jpg	0	0	-12.0425	-13.7359	10.3057	0	0	0	0	13.1443	0	0	-11.2493	0	-15.4057	0	11.1958	-22.5114	0	0	19.5211	0	-11.5926	0	19.7435	-13.3577	22.9832	0	25.3148	0	0	0	0	-14.3369	0	-10.1575	0	0	0	0	-21.9504	0	0	26.6335	-15.3478	-10.4324	-17.4764	0	0
BlackMaleYoungAdult.jpg	0	0	0	-16.9333	0	-11.173	0	-19.6802	0	-20.4879	0	0	-19.7597	0	-18.3451	0	15.2756	-31.9578	0	0	0	0	-12.4665	0	0	0	27.6899	-10.9926	12.1557	-19.7066	0	0	0	-22.7209	10.3959	-13.2725	0	-11.9088	-14.2886	0	-29.0094	0	0	15.9895	0	0	-20.6668	0	0
WhiteFemaleElderly.jpg	0	0	-16.1524	-12.9438	0	-25.5173	0	-21.9208	-16.8199	0	0	-33.5907	-33.5239	0	-16.7833	0	-27.4966	-30.1049	-29.9013	0	-11.7054	-34.4388	0	0	-12.7296	-29.153	0	0	0	-10.7478	0	0	10.5625	-15.7897	-28.9222	-15.0704	0	-11.518	-16.1677	0	-20.7358	0	-10.2947	0	-12.5999	-11.0202	0	0	-18.1953
WhiteFemaleMiddleAged.jpg	0	0	0	-14.9381	0	-16.5936	0	-41.6356	-15.7264	0	-19.2925	-12.5374	0	0	0	0	0	-24.4405	-16.438	0	0	-18.6136	12.7369	-19.8637	-26.4089	-14.6309	10.1372	23.8705	0	-19.2933	0	0	0	-12.6433	12.4829	0	0	11.3119	0	0	-11.395	17.6255	0	0	-13.968	0	-31.6357	12.8825	0
WhiteFemaleYoungAdult.jpg	0	0	-17.1254	-11.073	-31.9095	-40.2553	-17.1703	-15.7447	0	0	-19.4458	-37.8837	-19.2688	-14.9003	-38.5729	-29.2464	-12.8421	-33.0045	-56.7059	0	0	-34.4413	-16.9065	-28.7135	-36.0033	-21.6839	0	0	-16.1568	-48.7601	-20.1204	0	-10.4792	-28.7767	-23.5092	0	0	-10.0745	-13.4258	-34.0257	-27.4725	0	-12.6497	-17.0739	0	-30.7366	-16.474	0	-31.9064
WhiteMaleElderly.jpg	39.9833	51.0092	46.0942	51.4095	10.8348	15.0517	32.567	0	27.8904	0	14.8612	12.6463	33.7972	36.1242	17.4783	43.5481	73.4606	0	12.8074	0	38.9028	0	21.1688	49.2167	0	44.6924	35.4026	60.553	44.8601	19.3152	0	49.8131	0	67.3683	34.546	29.8898	43.9842	57.6325	33.9938	23.228	18.717	40.2075	56.9021	32.7472	50.7207	49.1191	27.7673	0	14.2073
WhiteMaleMiddleAged.jpg	35.2987	25.6029	10.5306	28.3135	22.8138	0	0	0	17.9655	20.5306	27.7496	-13.4175	0	0	11.7593	42.1071	28.1764	0	-10.7578	41.5492	30.9882	-12.3279	17.7445	35.0563	18.9879	0	31.4939	13.164	29.5212	0	29.1043	36.8651	20.526	0	0	0	14.8909	23.6221	26.2204	32.6416	0	41.1203	25.0585	37.7328	37.0267	0	15.9894	42.9128	-16.3196
WhiteMaleYoungAdult.jpg	-13.2154	0	0	0	-24.3853	-40.627	-20.3543	-21.7122	0	0	-19.9382	-46.8028	-15.8621	0	-23.354	0	0	-19.7213	-34.8259	-15.0866	0	-45.9273	-13.3514	-27.0378	-20.8789	-20.4291	-23.2133	0	-10.138	-31.5849	-21.649	0	-15.0198	-37.1742	-18.9624	-24.709	0	-12.0292	0	-22.8501	-38.8558	0	0	-12.9283	-12.7078	-18.2723	-18.2168	0	-27.0899
变浅count	140.603	151.716	97.5597	123.456	43.9542	15.0517	70.8679	19.4686	45.8558	102.81	74.5411	12.6463	55.9471	85.7107	49.4104	207.264	228.216	0	12.8074	82.8283	147.913	0	81.1782	98.4423	84.8631	44.6924	217.504	202.942	230.76	19.3152	54.1834	168.197	44.4568	78.4048	96.8436	29.8898	132.6	139.392	114.931	66.4178	18.717	184.851	132.441	129.896	128.684	61.8161	67.5781	162.405	53.6786
变深count	-43.9271	0	-150.906	-139.811	-196.287	-308.991	-101.899	-258.846	-76.1063	-47.503	-107.214	-256.379	-272.34	-46.1857	-270.685	-29.2464	-52.2633	-420.16	-226.137	-58.0281	-34.3216	-333.956	-148.408	-110.217	-120.618	-264.299	-34.1804	-10.9926	-36.574	-262.855	-86.755	0	-25.4991	-237.03	-147.129	-155.849	-21.7677	-89.6939	-63.9638	-142.038	-327.96	0	-52.7015	-82.065	-162.737	-145.055	-196.461	0	-163.392
SDXL
v1_img2img_AsianFemaleElderly.jpg.png	-22.8331	-18.9782	-25.7585	0	0	-10.5174	0	0	0	0	0	0	0	0	13.8485	13.6957	-22.3338	0	-22.798	-34.4196	-15.6864	0	-30.1004	0	-46.0543	0	0	0	0	0	0	0	10.9697	14.0248	-14.1657	0	0	-16.1877	-18.5825	-24.294	0	0	-11.1148	-27.9694	-36.2668	-31.61	0	-17.1909	0
v1_img2img_AsianFemaleMiddleAged.jpg.png	-10.2618	0	0	0	-29.6432	0	15.2749	0	0	-37.0139	-25.2603	0	0	0	-18.3296	0	0	0	0	0	0	0	0	-39.6531	-24.5172	0	-26.4208	-44.4565	0	0	0	0	0	14.6253	0	23.6526	0	0	25.2842	0	0	22.5779	0	-13.3398	0	-32.6538	0	0	0
v1_img2img_AsianFemaleYoungAdult.jpg.png	35.8722	33.6906	50.1306	11.0752	0	32.8398	45.0969	0	30.6238	0	18.9335	21.8672	0	0	10.6254	19.0027	37.7464	0	38.234	0	21.2067	47.3045	22.4843	0	0	0	0	0	53.869	25.4115	47.8585	39.1589	50.085	41.6024	0	0	34.5729	34.7899	31.163	34.4085	45.4484	54.097	0	43.7887	30.0159	26.4129	22.1814	0	0
v1_img2img_AsianMaleElderly.jpg.png	13.4227	-14.2555	10.3487	-13.7657	-27.6857	0	0	0	0	-38.0915	0	0	0	-23.485	0	-26.2678	-15.2267	-28.0627	0	0	0	0	-13.3495	0	0	0	0	0	0	0	-11.1256	0	0	0	0	-20.3759	18.8366	22.5356	0	-18.3647	11.8786	11.7298	0	-14.4904	-23.9066	0	-27.9624	-44.785	-22.2224
v1_img2img_AsianMaleMiddleAged.jpg.png	-32.5117	-36.3811	-25.7756	-53.3002	0	-52.8267	-20.0081	25.1801	-54.9176	0	-39.356	-49.2854	-25.8039	31.4817	0	0	-19.9897	-40.8543	11.8848	0	-40.4377	-11.549	-28.5846	26.4156	-37.3727	-35.1689	30.3796	0	0	-11.0633	-14.2812	0	0	0	21.4727	-30.1356	0	0	13.3689	-36.9968	-43.939	0	0	-47.85	-17.886	-30.1723	0	-37.0733	-14.3093
v1_img2img_AsianMaleYoungAdult.jpg.png	0	18.7997	-16.9506	0	10.5017	10.4603	0	10.2696	-14.8599	0	0	15.1143	37.7256	0	0	21.5635	0	0	0	-12.9222	11.7696	0	-13.002	0	0	-18.2199	41.8343	0	27.6429	-11.9844	23.7623	11.186	0	27.6888	0	10.0107	0	0	0	20.2146	0	19.2181	0	0	26.7507	-18.6826	-32.995	0	-19.4861
v1_img2img_BlackFemaleElderly.jpg.png	25.9583	0	14.3327	20.9176	0	0	0	0	16.1141	0	0	15.1839	0	0	23.6678	62.9114	15.6161	27.3508	14.7387	0	0	0	0	0	0	0	52.1726	0	36.959	22.7625	23.9316	0	26.3353	0	0	28.0906	19.4753	13.8171	35.3666	0	0	0	26.6008	0	29.4706	0	36.1435	42.7843	0
v1_img2img_BlackFemaleMiddleAged.jpg.png	0	0	22.2567	0	0	17.4566	25.7713	0	0	0	24.9959	14.6644	-12.1403	0	0	15.0779	0	0	20.4648	0	0	11.9122	10.126	20.4424	0	0	0	0	0	0	0	0	0	22.2834	15.6867	14.7089	29.1983	21.7509	0	0	18.2706	21.983	30.2599	-14.9223	11.6609	-16.0686	0	16.1009	0
v1_img2img_BlackFemaleYoungAdult.jpg.png	0	0	0	0	0	12.2552	-32.1307	0	0	0	0	-31.6983	0	0	-15.3833	11.8884	0	0	0	-11.3348	-24.5034	11.342	0	0	0	0	0	0	0	0	0	0	0	0	0	-27.4523	0	-16.9499	0	0	-19.2924	0	-15.2885	-16.058	0	-20.631	13.8804	0	0
v1_img2img_BlackMaleElderly.jpg.png	0	24.2541	26.094	0	0	0	0	20.8527	-17.8951	16.9	0	22.1602	0	0	0	23.3508	11.3305	0	0	0	0	24.2985	33.3808	0	0	0	54.3866	0	45.9287	0	0	16.4791	0	10.7648	32.0047	17.8169	13.6789	0	52.2814	0	0	15.9896	0	0	11.0123	0	0	16.2392	14.5395
v1_img2img_BlackmaleMiddleAged.jpg.png	14.1532	33.425	14.2047	38.3208	11.6263	0	12.4592	30.8763	0	48.0343	27.6129	15.3347	0	35.1178	11.2284	36.2439	40.561	23.9364	22.5545	17.121	0	28.9681	26.05	0	0	10.5414	21.0911	0	51.8853	16.6606	19.0467	19.7579	0	0	12.1948	12.7156	10.6423	21.3184	27.0287	12.8154	26.103	23.0706	30.541	-15.7573	27.3202	0	29.4384	24.4447	0
v1_img2img_BlackMaleYoungAdult.jpg.png	41.9976	34.205	36.8265	0	27.5716	0	22.6836	10.6298	43.6865	0	21.7323	-16.0408	0	26.0364	0	27.5618	12.8203	0	22.5009	0	0	31.1167	0	0	23.5851	24.4933	51.0432	0	53.9571	-27.0356	-12.5511	41.5546	39.0849	0	-14.9839	45.3538	40.0678	45.2537	42.1259	33.3913	26.3021	-25.3041	0	29.5879	25.3753	13.2372	30.1119	0	0
v1_img2img_WhiteFemaleElderly.jpg.png	-14.4277	0	0	0	0	0	13.5873	0	-31.5889	0	0	-24.6829	-21.0385	0	0	-18.1733	0	0	-12.1927	-11.0734	-13.9193	0	0	0	-47.7173	-26.2749	-17.3392	-34.9163	0	0	0	0	-18.947	24.7558	0	0	0	13.2299	0	0	0	0	0	-11.7896	0	-21.8819	0	0	-14.4339
v1_img2img_WhiteFemaleMiddleAged.jpg.png	0	12.4977	-17.4773	-39.0137	23.0442	0	0	-35.6273	-59.5101	0	-27.6776	0	-39.1985	0	0	11.205	0	11.7029	-10.4325	0	0	0	0	0	0	-40.1844	29.1737	0	0	-42.0403	0	0	0	0	-14.3399	-33.9813	20.6933	11.7494	0	0	0	0	0	0	-28.5102	-22.9695	0	-37.1673	-26.0153
v1_img2img_WhiteFemaleYoungAdult.jpg.png	0	-13.9509	-25.9324	-40.2993	-34.8206	0	0	0	-10.1713	0	0	-34.9763	-33.1044	0	0	-12.9878	-12.6958	-29.5005	-29.5616	-17.5974	0	0	-27.3489	-52.647	0	-50.6431	0	-44.3041	-13.7677	0	0	-15.3547	-18.75	0	0	0	-13.2791	0	-15.0991	-30.4513	-17.2201	-11.8342	0	-44.2111	-13.4546	-10.1148	-35.2896	-32.4699	-15.1448
v1_img2img_WhiteMaleElderly.jpg.png	22.6314	42.3064	27.1657	0	0	39.4642	17.6542	0	0	0	0	52.8914	0	56.3786	15.5616	24.4096	24.9768	0	44.6973	0	16.9025	0	0	15.3505	26.7278	0	0	0	43.7508	26.5696	52.4144	52.3904	53.8335	59.2449	36.2963	44.7578	0	46.503	0	51.8229	0	0	63.1081	0	41.6635	19.4396	52.4345	42.3077	64.7835
v1_img2img_WhiteMaleMiddleAged.jpg.png	43.5477	35.1475	12.6279	44.7701	46.2861	21.8205	37.0377	18.4297	11.8707	53.7207	0	17.5154	40.1483	57.488	30.9295	75.6262	51.0056	20.8017	29.4435	50.0982	20.4921	22.8976	56.4743	32.7924	0	0	57.42	42.3378	0	0	37.8671	35.8078	36.384	46.7253	29.472	32.5305	71.3434	27.8575	66.9871	36.4002	38.4701	38.535	36.163	34.2192	27.309	23.7762	0	15.9501	31.4666
v1_img2img_WhiteMaleYoungAdult.jpg.png	0	0	12.6848	10.6778	-13.1479	17.6693	0	-28.8222	-32.2036	-12.5568	0	0	21.302	0	0	19.2323	0	-13.0263	0	-12.2862	11.7106	0	-28.2769	-15.7546	-28.7931	-35.6344	12.785	0	0	-29.3042	0	-14.9794	25.3184	0	0	0	10.9565	14.1318	0	0	0	23.7536	-14.899	-11.2388	0	0	0	0	-10.1521
变浅count	197.583	234.326	226.672	125.761	119.03	151.966	189.565	116.238	102.295	118.655	93.2745	174.732	99.1759	206.503	105.861	361.769	194.057	83.7919	204.519	67.2191	82.0815	177.84	148.515	95.0009	50.3129	35.0347	350.286	42.3378	313.993	91.4043	204.88	216.335	242.011	261.716	147.127	229.637	269.465	272.937	293.606	189.053	166.473	230.955	186.673	107.596	230.578	82.8659	184.19	157.827	110.79
变深count	-80.0343	-83.5656	-111.894	-146.379	-105.297	-63.3441	-52.1387	-64.4494	-221.147	-87.6623	-92.2939	-156.684	-131.286	-23.485	-33.7129	-57.4289	-70.2461	-111.444	-74.9848	-99.6336	-94.5468	-11.549	-140.662	-108.055	-184.455	-206.126	-43.76	-123.677	-13.7677	-121.428	-37.9579	-30.3341	-37.6971	0	-43.4895	-111.945	-13.2791	-33.1376	-33.6816	-110.107	-80.4515	-37.1382	-41.3024	-217.627	-120.024	-204.784	-96.247	-168.686	-121.764
midjourney
AsianFemaleElderly.png	0	0	0	14.6719	0	0	0	0	-33.6608	0	-23.623	0	-20.4592	-21.6588	0	0	0	-11.3497	-16.0144	-18.4885	0	0	-14.7734	-25.9897	-35.0545	-16.1511	12.0423	-20.0345	0	0	0	0	0	0	0	0	0	0	-13.4672	0	0	-19.0002	-13.3631	-11.4311	-17.2809	-28.959	15.9464	-12.3024	-19.1977
AsianFemaleMiddleAged.png	0	0	-17.9574	0	-23.9217	-20.0746	0	17.441	-27.2525	0	-12.7737	-11.0423	-24.8252	-22.2113	19.9633	0	-12.6461	-21.0641	-36.1286	-11.5137	-20.7094	0	-20.8859	0	-22.3365	0	-12.8603	-10.539	0	0	0	-15.382	0	-12.2174	-13.9928	-17.9488	0	0	-17.8244	0	-24.0348	0	-11.6962	-26.8625	-10.0272	-16.0403	0	0	-16.7117
AsianFemaleYoungAdult.png	29.077	34.0607	25.7834	37.3007	23.2616	32.9559	26.858	36.1616	0	37.3679	28.0495	0	0	19.7212	33.5135	36.8574	16.3172	18.0332	21.0129	17.1215	31.2266	25.5658	28.4768	12.9897	19.1162	27.7977	18.6871	22.4695	23.7599	40.7406	33.7099	22.706	16.9109	20.0377	30.8315	30.249	28.515	23.7617	19.4219	26.5891	24.3977	24.295	29.1955	16.0268	32.4166	0	31.2912	28.6785	24.9741
AsianMaleElderly.png	-27.4118	0	-25.6541	-39.9991	-29.5923	0	-22.222	-21.135	-33.8413	-10.9225	-30.5952	0	-43.3686	-57.0804	-21.0546	-23.1547	-35.9508	-31.2754	-47.2022	-37.6051	-28.9293	-10.4364	-50.6138	-44.8117	-43.8982	-27.4479	-21.3981	-41.5913	-27.8152	0	-24.5287	-32.0937	-27.071	-32.7699	-40.307	-31.0604	-24.5166	-24.5247	-36.9392	-22.2155	-24.3275	-21.2296	-34.7848	-38.0278	-28.948	-46.7614	-15.9905	-37.7579	-35.5985
AsianMaleMiddleAged.png	0	11.1278	-11.5154	15.7743	-11.6762	-10.9038	0	10.4398	-24.7242	19.2689	0	11.9279	-21.2312	-15.1408	0	0	-11.0373	-14.9727	0	-11.9467	0	0	-19.6232	-10.013	-23.6803	0	0	0	0	-12.1838	0	0	0	0	0	0	0	0	-18.8908	0	0	0	-18.7302	-23.2969	0	-29.8506	12.347	-20.014	0
AsianMaleYoungAdult.png	0	0	0	0	-17.1561	0	0	0	-26.6518	13.0789	0	0	0	0	0	-10.134	0	0	-21.0183	0	0	0	-21.3968	0	-10.7058	0	13.0901	0	0	12.8781	0	0	0	0	0	0	-10.1146	0	0	14.8142	-10.1916	10.8838	0	0	0	-17.9103	21.7065	0	0
BlackFemaleElderly.png	12.2035	12.907	0	28.1971	0	19.497	0	17.1307	0	16.2736	0	0	0	0	11.3025	0	0	0	0	0	20.8149	0	0	0	0	0	0	0	15.6966	21.4357	13.3348	11.5885	24.1271	13.8436	13.1974	11.8078	0	12.6369	17.991	25.7321	19.1184	0	0	0	10.6523	0	29.9633	0	0
BlackFemaleMiddleAged.png	14.0928	0	0	0	0	18.4906	0	10.8519	0	13.0803	0	0	-11.5769	0	0	10.1456	0	0	-17.0844	0	11.6739	0	0	0	0	0	10.5452	0	0	18.0939	0	0	19.5103	18.2915	17.4384	0	10.5771	21.7726	10.3647	17.6064	0	0	0	16.2368	17.7319	0	29.0713	12.9733	0
BlackFemaleYoungAdult.png	0	0	-10.7708	0	-14.6446	0	0	0	-17.1958	0	-15.7327	0	-15.2849	-18.8332	0	0	0	-10.6207	-28.9103	-10.6902	-12.0201	12.4481	0	0	-16.3449	-15.0363	0	-15.8791	-10.282	0	-11.2161	0	-11.5279	0	-13.9068	0	0	0	-10.6103	0	-17.6056	0	-16.9984	-12.4441	-10.3166	-15.0561	0	0	-41.4131
BlackMaleElderly.png	0	0	-10.7558	0	0	-17.2458	0	0	-19.182	16.3373	0	0	0	-14.5485	-12.679	16.1824	0	0	-24.4063	0	0	-11.3216	0	0	0	0	-14.8354	0	-12.9394	0	0	0	28.1466	0	13.302	0	-18.2757	0	0	25.072	0	0	0	0	0	0	17.1248	0	-35.2903
BlackMaleMiddleAged.png	0	18.0458	-10.5999	0	0	17.7927	0	20.9097	0	0	0	16.2031	0	-19.2738	0	14.5043	0	13.2615	-11.3726	0	0	0	0	0	0	0	0	0	0	14.2577	0	0	23.4367	0	10.0424	12.9036	0	17.7603	0	16.3857	0	0	0	11.8376	0	0	13.4067	15.8513	-12.9752
BlackMaleYoungAdult.png	0	0	0	0	0	14.0884	0	12.0532	0	11.7738	0	0	-12.4306	0	0	11.6418	-13.3891	0	-11.7741	-12.3978	0	0	0	0	0	0	0	-10.949	0	10.7759	0	0	17.1041	0	0	0	20.7413	0	0	16.7423	-13.0324	0	0	0	0	-13.8537	25.1642	0	-32.3717
WhiteFemaleElderly.png	-21.1928	-13.7403	-26.2429	0	-22.44	-10.2265	-12.949	0	-22.7241	0	-23.4445	-22.386	-26.1046	-23.276	0	-18.8994	-22.6923	-21.4688	-33.6184	-24.42	-10.3476	0	-27.5202	-11.9522	-43.3006	-11.005	-18.4547	-15.6037	-17.1842	0	-18.1274	-24.5048	-16.7124	-20.8017	0	-13.8829	-12.0176	0	-18.286	0	-26.3566	-10.386	-15.7841	-14.6532	-22.3661	-29.835	0	-22.5527	-26.6142
WhiteFemaleMiddleAged.png	0	0	-16.2072	0	-13.8187	-17.6447	0	0	-21.2267	0	0	0	-16.7784	-11.2174	10.7733	0	-16.994	-17.519	-38.7335	0	0	-24.3885	0	0	-11.9389	-13.8975	0	0	0	0	0	-10.8687	0	0	-10.9664	0	-15.3951	0	0	0	0	10.5281	0	-10.6684	-13.5451	-20.2843	16.3144	0	-27.0397
WhiteFemaleYoungAdult.png	-27.6536	-12.2913	-25.0181	-25.3838	-30.5006	-43.4945	-15.6799	0	-27.5944	-20.9887	-24.5284	0	-39.6104	-33.496	-16.6358	-18.5563	-32.7522	-39.6702	-27.0032	-22.0506	-21.3349	0	-26.4824	-29.6343	-35.7821	-23.2583	-26.2728	-26.6566	-21.4153	-24.7739	-24.3664	-25.8179	-20.012	-22.4127	-23.3349	-32.5228	-21.0051	0	-35.3793	-12.3863	-18.0749	-32.6281	-19.9391	-26.6807	-24.841	-23.8003	-12.9481	-18.6235	-22.584
WhiteMaleElderly.png	32.0643	37.316	22.0372	39.2871	25.8013	26.0793	31.2983	40.6678	10.8636	39.8164	31.6911	43.8366	23.8119	23.9481	26.7381	19.6164	30.6176	23.796	0	27.672	22.1272	33.9523	32.9306	32.9615	0	35.3077	42.4863	28.2247	33.3634	40.2611	31.305	30.7905	46.5898	28.1783	23.4343	34.028	26.1776	32.0251	23.0092	47.025	31.2406	42.5515	22.9223	23.8425	36.9843	0	43.878	31.2658	-10.7715
WhiteMaleMiddleAged.png	13.8528	28.7332	0	0	0	0	0	0	0	0	0	28.6731	0	0	0	0	0	0	0	0	0	13.3272	0	0	0	0	0	0	25.7879	15.7772	0	0	0	0	0	0	0	11.4414	0	22.3921	0	0	0	0	0	0	16.0137	0	0
WhiteMaleYoungAdult.png	-21.2621	-14.1912	-32.7159	-14.9047	-26.1825	-17.5545	-20.3771	0	-50.0689	-12.0683	-26.9778	-18.8409	-37.092	-27.3397	-13.6647	-26.7769	-21.1997	-32.9513	-17.2435	-20.4318	0	0	-41.8764	-37.9303	-32.8555	-35.2362	-21.0137	-29.7885	-16.5725	-10.9333	-27.14	-25.3869	-20.5686	-21.5062	-18.3835	-21.4396	-30.5925	-27.5163	-24.4771	0	-20.9849	-17.3428	-17.4111	-31.5196	-25.0187	-37.2076	0	-20.7751	-16.9309
变浅count	101.29	142.191	47.8206	135.231	49.0629	128.904	58.1563	165.656	10.8636	166.997	59.7405	100.641	23.8119	43.6693	102.291	108.948	46.9349	55.0907	21.0129	44.7935	85.8425	85.2934	61.4073	45.9512	19.1162	63.1054	96.8509	50.6942	98.6078	174.22	78.3498	65.085	175.826	80.351	108.246	88.9884	86.0109	119.398	70.7867	212.359	74.7568	88.2583	52.1178	67.9437	97.7851	0	272.227	88.7689	24.9741
变深count	-97.5202	-40.2228	-187.438	-80.2876	-189.933	-137.144	-71.2281	-21.135	-304.123	-43.9795	-157.675	-52.2691	-268.762	-264.076	-64.0341	-97.5213	-166.661	-200.892	-330.51	-169.544	-93.3413	-46.1465	-223.172	-160.331	-275.897	-142.032	-114.835	-171.042	-106.209	-47.8909	-105.379	-134.054	-95.8919	-109.708	-120.891	-116.854	-131.917	-52.041	-175.874	-34.6017	-154.608	-100.587	-148.707	-195.584	-152.343	-279.559	-28.9385	-132.026	-297.499
	accountant	architect	artist	astronomer	baker	banker	bartender	bricklayer	busDriver	butcher	carpenter	CEO	chef	cleaner	dancer	dentist	designer	doctor	economist	electrition	engineer	entrepreneur	factoryWorker	farmer	firefighter	fisherman	florist	gardener	hairdresser	journalist	judge	lawyer	lecturer	librarian	lifeguard	mechanic	model	newsreader	nurse	optician	painter	pharmacist	photographer	pilot	plumber	police	politician	postman	president
	8.01346	9.78769	-8.87685	-10.672	-14.8069	-4.54248	-17.2922	30.7358	7.22345	2.58838	18.0952	11.5023	-18.7242	8.22059	-11.9525	0.129852	-15.735	-0.153646	21.9342	-9.86867	12.7266	1.07733	-7.24394	-15.676	13.2196	126.203	-29.1256	19.3904	12.987	16.5724	14.35	3.62138	3.96101	-18.6007	19.5205	11.774	23.1956	-8.65719	9.7632	-0.0430352	-0.427912	3.41316	4.69511	7.98154	13.2949	18.8436	12.244	8.82715	17.2007
	14.1619	-18.4357	-6.85639	-24.8998	1.02323	-11.7264	-8.0228	6.43476	-9.52069	-12.4253	-30.5086	-4.09307	-10.3067	-31.585	7.58587	22.9201	-9.23743	-20.3274	-15.7493	7.60734	4.19703	-27.7311	16.2222	-17.8729	-1.11177	-19.638	5.87617	1.49001	12.41	8.67338	6.66245	-10.9006	3.83749	-12.0084	-23.2027	-6.18132	7.76226	-8.98908	2.61124	5.10063	11.0179	-20.768	-28.0375	-5.95	6.45664	25.3438	3.93267	-12.514	-20.1899
	27.728	31.979	31.6231	29.467	45.9561	35.5097	23.7377	-14.4982	3.67787	15.8488	14.6961	37.9801	9.73985	3.24843	30.9881	14.6057	22.2227	15.3733	45.6364	30.4616	28.8166	32.6217	35.576	7.84067	16.3335	9.51278	28.3629	53.0105	32.1431	19.8572	32.1066	36.3654	22.014	13.1255	-2.00211	23.0697	13.486	-15.6401	10.4794	18.4323	34.4738	7.07869	7.04054	33.243	30.0873	49.5771	27.0245	6.231	32.5663
	-5.53397	-6.23096	-11.0452	-33.1251	-22.3603	1.56044	-20.9948	-6.84099	-22.186	-9.99656	-5.22998	2.76559	-21.5784	-24.1526	-27.0409	-2.51936	-28.5889	-19.1359	-4.81634	-11.7712	-10.134	-7.61923	-11.1842	-23.554	-14.8044	-11.2071	-18.9607	9.08483	4.81549	-9.44161	-15.8965	-35.7807	-23.313	-37.3331	-17.8215	-20.5107	-15.11	-6.09894	-4.16818	-4.73705	16.6963	-28.4956	-16.5768	4.01972	-9.05129	-9.41814	-4.82089	-3.29038	-35.711
	-5.13293	-1.38692	11.9299	-35.437	4.91082	12.6798	-9.2839	20.052	-22.7546	3.25756	9.4571	-1.24964	-15.2757	-19.8108	-10.3734	13.5407	-21.0493	-4.51096	-13.9733	9.50009	4.94093	6.59986	8.08104	-19.5058	-4.88846	-1.23352	-3.41039	6.50277	-6.85658	3.57239	-14.9744	-13.4	1.3043	-11.8958	-6.12465	7.36298	4.01336	-4.34918	-9.4062	4.89938	28.0364	-9.08748	2.98828	7.41865	5.17211	19.3214	2.85128	3.97863	-19.7462
	-4.7937	-4.5244	-8.50177	-31.5262	-12.8003	-0.0706144	-20.7142	-5.08086	-2.21961	-22.7144	-17.1446	-2.91195	-8.77591	-6.3589	-22.4475	0.503636	-15.2267	-11.4737	5.11371	136.563	-2.43823	-10.8173	-14.9523	-16.3831	3.2033	-23.5807	14.0633	17.0029	19.0216	-5.45873	-6.91526	-26.0328	0.443075	-6.5226	-8.87005	7.38258	28.1493	-10.4229	1.12897	-16.1656	4.14432	-12.8519	-14.5721	-8.71672	-9.58796	-0.0153483	-9.25468	5.02235	-14.4757
	20.5	22.2339	36.4641	-1.09631	20.7791	35.1432	33.0399	20.0404	162.51	30.0598	162.51	42.1812	16.24	25.8653	21.7798	33.3393	15.673	11.0043	44.9139	162.51	22.0214	42.1626	9.93785	-14.944	2.652	162.51	13.4361	26.8495	17.8918	162.51	17.6308	9.64325	13.8646	14.1341	-0.866539	31.0313	29.1657	-1.69403	22.4679	8.15917	41.0096	14.2127	28.3658	162.51	19.7964	29.0229	14.488	1.16322	26.0423
	-4.6652	-2.97444	-4.96374	-10.3139	-7.59249	-8.08415	-12.4588	4.36934	3.31888	-7.43645	-22.1724	-6.03107	-11.2141	-10.8372	-7.17675	1.07549	-15.5846	-9.74388	10.5438	-10.4926	-5.83159	-7.63004	-28.1181	-4.10677	-11.2608	-23.89	19.1308	14.2305	13.4422	-4.40872	-2.82808	-16.1332	-11.0845	-18.5897	-26.5023	11.9854	2.27876	-4.16395	10.141	-12.9004	2.26644	-7.3404	-5.85736	-8.32953	-6.79283	4.4653	-10.9826	-5.80265	-5.76872
	0.512247	-3.80863	-19.6195	-18.4751	8.65035	5.26845	-6.97734	3.88911	-5.13568	12.6088	-1.10145	15.3956	8.21381	4.42553	-9.54354	13.3039	-9.36758	9.48841	19.0312	-2.72025	0.0345003	2.49781	-0.763623	-3.02273	-5.50477	-1.80523	-6.60198	9.37681	6.42152	-6.9886	3.21546	-14.7713	4.0759	-14.2817	-18.0149	15.9407	-8.11463	-20.6253	-7.04736	-4.34832	9.5334	0.482999	1.04658	6.9438	3.30195	4.07686	-2.83984	-16.826	1.41955
	-0.410696	14.5331	-10.8941	-18.4199	-15.0741	15.2015	-10.8481	10.6872	-4.96724	11.37	6.08307	-3.27887	-5.44435	-3.23962	0.0198501	19.4866	-10.3381	-1.98103	9.60247	-3.72472	0.0338288	11.7734	8.34175	2.49689	-1.8059	9.74798	20.8664	15.0415	-3.20502	6.83691	-3.30483	-16.843	2.21476	-12.8853	3.50838	9.16442	11.5819	-11.2748	5.79095	6.12268	21.3703	-11.6294	2.09697	2.39779	17.6257	3.46518	4.93042	-0.843809	-8.7426
	0.994603	16.2144	13.437	-20.1144	-13.9663	9.60675	-12.0942	9.72409	0.574033	3.02629	7.87225	1.7944	-3.70925	-7.46843	10.0081	4.80346	-4.62859	-0.224331	0.789499	-2.65301	10.469	-2.9357	-11.2786	0.3581	-4.20955	-5.88532	22.776	19.9195	4.56917	-0.305507	-8.5826	-14.4127	4.51378	-11.3026	0.0159319	22.2312	20.6699	-1.80431	11.3831	-0.730347	15.716	18.8301	1.78182	7.6527	19.4186	6.1434	-13.19	1.06487	-7.91193
	-3.53434	10.4328	-16.2404	-22.2458	-18.0493	10.1826	-22.5044	16.1917	-9.00667	16.1709	4.36747	5.48076	0.503592	-6.05474	-8.35496	-2.43628	-12.1267	-1.48774	14.1547	159.558	1.4646	-7.71911	-13.4362	-16.277	-0.713235	-12.6494	19.3941	3.85493	5.32603	8.23622	-15.1393	-11.1593	-6.91642	-12.6379	11.9108	11.3539	10.4049	-3.8309	14.8659	-2.54936	21.673	6.9305	-5.72121	8.41023	9.40326	-1.66465	-1.11784	2.46166	-18.5583
	-9.58044	4.97408	-21.3767	-24.0621	-6.62807	8.45564	-10.769	-1.07337	-16.2662	-24.416	-1.10363	-13.8197	-1.88345	-1.11351	-17.3886	12.9964	-9.50818	-10.9267	17.9576	-0.835423	-0.9652	-0.00359925	-17.2516	7.50276	-5.61702	-20.9633	17.0057	22.4466	17.6031	16.0867	5.30453	-8.83204	9.61109	-12.8736	-7.81824	8.68878	-6.12767	1.21035	10.3465	-3.45169	6.25749	0.779734	9.68444	8.5396	-12.2255	-66.419	4.75246	-12.6204	4.25627
	-14.1358	6.07749	2.96368	-1.63331	13.036	12.9205	0.188545	-19.1562	-8.65778	-6.10681	-10.956	7.13696	-8.84414	-9.72383	-9.88863	-9.21982	9.32109	-3.57778	1.06326	-10.7031	4.61484	1.22402	5.01502	-15.3817	-6.61303	-16.8317	4.44547	6.2262	-19.1654	-19.2319	9.77043	2.30488	8.74041	-10.1338	-24.3454	-6.02183	-11.6321	-19.009	-7.68036	-18.3854	20.275	-9.08076	-29.7814	7.36224	-2.10916	10.8285	10.994	-9.99142	-16.0458
	-14.5489	0.972277	-12.7379	-32.6199	-5.7433	-1.50363	-10.3851	-23.558	-24.0689	-10.6224	-17.1443	1.13343	-14.013	-30.2377	-8.60296	0.843558	-16.3704	-16.8518	0.917373	-17.2887	0.148674	-20.0293	-0.9924	-29.2163	-17.425	-28.633	-5.50734	9.866	-22.8221	-0.609438	-0.913467	-25.9863	1.29587	-29.7308	-50.9264	-13.3284	-18.2346	-37.3712	-28.3727	-6.91737	11.3085	-21.5553	-11.8386	-5.27479	-0.63688	6.16464	-13.7762	-30.244	-24.8287
	66.4207	37.7429	74.8205	32.0293	36.4944	53.7017	28.2761	16.9408	31.1535	53.272	36.6418	53.9562	32.1657	40.9543	44.294	55.5384	42.7472	18.6131	49.9192	47.1663	63.1739	71.7186	54.9087	33.5644	62.7901	159.61	52.4695	76.4743	30.7663	66.8654	53.2463	62.5017	60.4028	52.1286	14.2985	159.61	72.0646	38.484	22.7516	45.6214	54.4301	24.7797	40.2822	50.9132	51.227	62.7933	57.2767	40.4951	63.9246
	28.899	28.2473	17.2096	16.0159	25.5537	26.4118	6.73904	45.835	32.5858	41.382	17.566	30.8108	21.2673	1.08358	8.51385	46.8835	17.2607	36.772	38.3664	29.9106	19.935	30.2843	38.2063	14.0349	23.1977	20.6279	17.3076	50.625	32.1182	33.0295	24.0805	19.2606	35.0836	8.87435	22.303	21.5254	29.9176	31.8942	23.5984	20.8432	40.5155	17.9874	24.0333	8.18533	42.7838	23.4144	28.6194	26.1058	20.0342
	-0.645062	-5.43256	-0.831094	-35.5179	-3.12678	3.24638	-15.3218	-8.93824	-13.9437	-13.2873	-21.5213	-12.195	-14.798	-20.2022	-14.0193	7.55426	-19.2157	-6.48327	6.59825	-1.83271	-0.530853	-6.09572	-4.11383	-26.5047	-9.81475	-6.45295	11.5854	0.60924	2.97858	-10.2999	2.9555	-20.0178	0.126624	-21.7157	-25.9555	7.78215	-7.37914	-15.5217	-13.3601	-14.6009	-10.6876	-12.7287	-10.923	-4.56221	-14.7515	2.38134	-0.104934	-12.3204	-8.89091
	0.28958	0.390004	0.184734	-0.674018	0.10071	0.566558	-0.238015	0.293761	0.284212	0.229387	0.417796	0.462661	-0.128991	-0.24163	-0.0655543	0.648193	-0.221535	-0.0434086	0.700008	1.42052	0.424103	0.303829	0.185983	-0.379575	0.104521	0.876226	0.508648	1.00556	0.445681	0.793044	0.279912	-0.223813	0.361598	-0.395137	-0.39137	0.841278	0.516922	-0.271845	0.209148	0.0676371	0.910024	-0.108452	-0.00359148	0.785402	0.453924	0.523124	0.308407	-0.0252873	-0.0428495
	accountant	architect	artist	astronomer	baker	banker	bartender	bricklayer	busDriver	butcher	carpenter	CEO	chef	cleaner	dancer	dentist	designer	doctor	economist	electrition	engineer	entrepreneur	factoryWorker	farmer	firefighter	fisherman	florist	gardener	hairdresser	journalist	judge	lawyer	lecturer	librarian	lifeguard	mechanic	model	newsreader	nurse	optician	painter	pharmacist	photographer	pilot	plumber	police	politician	postman	president
	-3.14025	12.4219	-11.6249	-11.9674	-16.3663	-15.7473	-27.3041	-20.4064	-11.0794		-17.6365	-3.40562	-28.2587	10.2178	-18.6946		17.9898	-32.5216		-12.5227	11.0736	-16.1201	-13.187	8.48491	13.4535	-8.75684	-4.54019	8.03216	19.8854	-29.831	-14.8523	9.86865	-7.8211	-14.3692	-0.607702	-12.7527	-3.09491	16.4316	8.20425	-8.44258	-14.369	11.9045	5.07273	-25.2747		3.49046	1.47469	1.11264	-2.90611
	-3.6387	-0.379577	-16.1342	-3.11812	-31.9929	-27.3282	-16.1104	-15.1708	-11.095	-15.5964	-12.8202	-27.6553	-23.9403	-7.18468	-32.1992	1.36246	-11.9246	-39.3453		-16.7052	-10.2306	-39.0401	3.90118	-4.56915	-3.25411	-30.0343	9.94836	21.6883	-10.2791	-39.4897	-18.7838	-5.81126	-3.41646	-11.453	-25.3453	-21.3583	-5.08005	-0.164643	11.4674	-13.0691	-22.5609	4.54404	-6.70677	-4.87311	-2.35877	-15.2929	-30.4224	26.0909	-14.5261
	22.9785	2.62287	26.9256	24.9442	-34.9368	2.53723	12.8767	19.4686	3.99959	52.1443	18.8147	1.69542	22.1499	23.2695	20.1728	63.4708	40.1332	-10.5626		18.0999	8.48005	-9.30682	29.5279	8.5356	-24.5971	-1.66024	-10.9671	60.577	36.8982	-1.42068	13.2321	28.7852	13.3683	11.0365	26.6	-9.90312	43.6932	30.3934	27.2447	6.25115	4.08509	22.489	50.4808	16.7926	40.9367	12.6971	12.8556	56.3838	25.0992
	-19.6465	-4.46434	-29.1833	-27.8019	-18.4387	-38.2083	-20.9599	-29.8678	-21.3856	-11.4186	-18.0813	-31.6089	-26.8547	-31.2854	-19.9117	-0.591061	-4.72226	-41.2252	-36.424	-3.0313	-12.3856	-37.7327	-24.9349	-11.4018	-7.28106	-24.915	-2.1563	-5.82922	9.88285	-26.9714	-8.81166	-2.90343	-4.15039	-14.3788	-28.7969	-18.3849	-21.7677	-14.6735	-6.65658	-30.1274	-29.6946	-9.01835	-14.2203	-11.5201	-14.2017	-15.0936	-33.83	5.04273	-36.9012
	1.64804	15.4211	-9.70712	5.07239	-38.2573	-25.1506	14.0232	-7.20942	-6.04591	5.29099	0.745431	-17.2319	-28.2656	-1.57601	-30.3017	-6.52115	0.501153	-32.0139	-20.9105	-13.7135	8.76684	-28.6058	-12.7102	-11.4168	8.20766	-16.3495	-9.276	23.0889	14.0467	0.0160852	-1.62729	4.59312	-8.89163	-11.1856	-6.10951	-9.55805	-2.75939	5.85423	-20.0817	-28.0409	-5.25277	8.32817	-5.45009	1.13446	-27.843	-3.95482	-8.35134	-4.31786	-4.17588
	-11.0652	2.27268	-22.3585	-0.117122	5.31616	-22.7008	-2.15107	-13.7159		-7.08207	0.38347	-16.3026	-13.045	1.51458	-26.5502	12.6331	-0.526819	-16.0504	-8.73847	-6.15577	-7.07842	-18.9302	-30.7273	-5.55022	7.20914	-17.1034	13.1168	9.30845	9.8395	-10.0756	-1.40435	14.1322	-1.67189	-9.25138	-9.39411	-14.9141	-6.66301	-18.4169	-6.5764	-8.16874	-27.0487	-7.44719	-0.605219	-3.39485	-21.8723	-2.33643	-11.9926	3.98311	-6.06287
	24.3279	29.626	14.0092	18.7888	3.67343	0.772154	11.401		2.42114	16.9913	13.1156	4.36128	9.00881	16.0992	5.71295	28.0257	25.0023	-24.6162	0.71029		31.2048	-3.47806	2.17601	14.1693		-22.3164	22.6466	9.95877	28.2564	5.05284	11.8469	22.9096	5.72376	-3.84954	-11.3898	-2.60925	30.0316	-1.8208	16.0042	10.5483	-0.423931	26.5944	2.45921		-8.52493	8.15335	10.9658	2.91507	5.92571
	-1.78514	2.96523	-12.723	-14.5906	8.48135	-8.75957	-4.89336	-13.9791	-6.07411	-5.32977	-0.288222	8.59759	-15.906	4.11605	-4.67445	0.308496	8.29087	-13.5892	7.0098	-9.09221	4.83151	-0.331816	-3.84831	-2.73502	16.4935	-16.74	22.0063	9.81547	-2.93929	-5.35944	8.39389	-0.649841	-6.99066	-15.315	-5.4737	-8.668	-2.4192	-4.90062	-3.73892	-2.15263	-29.8473	12.7368	-4.01529	-15.2681	-27.4138	-14.6813	-5.43744	10.0844	14.372
	18.0143	17.6345	2.61064	-9.78805	-5.20845	-28.3055	3.61231	-30.2919	-8.72683	7.0412	0.591387	-19.3482	-16.9673	2.8806	-18.4386	8.29563	16.9825	-24.3062	-20.1736	11.5845	6.28136	-29.7314	-12.5322	-11.783	-5.6122	-20.2719	21.0978	-3.07835	7.82096	-14.6544	-7.7471	15.692	7.78359	-23.0658	12.8189	0.635892	8.64601	9.81683	-8.4388	-13.9247	-30.5127	12.1732	5.73827	-9.5175	-16.7826	-11.9746	-7.4212	-3.90337	-18.4537
	-8.3377	5.7748	-13.5617	-15.8267	-1.68353	-17.384	2.00668	-14.7205	-1.65781	2.39132	-3.96773	-0.00451118	-19.4382	-6.96161	-12.128	17.479	9.47253	-24.1891	-8.73335	11.5947	16.2222	-18.0469	-8.31449	3.72919	16.1848	-17.3138	10.9297	8.4597	19.8217	-11.74	-11.3495	2.8395	-4.19987	-15.8211	-10.2033	-25.23	-2.72476	-11.073	4.25913	-2.37717	-24.5079	0.591087	-15.5369	1.80438	-0.172824	-17.5513	-15.746	14.0503	-3.44633
	-5.13476	-5.89306	-12.0425	-13.7359	10.3057	-5.04491	-5.06976	-4.22703	-7.04453	13.1443	7.54717	1.12882	-11.2493	-5.14559	-15.4057	4.80922	11.1958	-22.5114	5.29201	2.68034	19.5211	2.40179	-11.5926	1.16004	19.7435	-13.3577	22.9832	5.17215	25.3148	1.50171	0.219132	0.30924	8.82165	-14.3369	-8.27364	-10.1575	-5.89641	-7.37499	3.27651	9.1241	-21.9504	-5.03677	-7.49201	26.6335	-15.3478	-10.4324	-17.4764	6.8477	-1.2111
	-3.34347	5.23258	1.73953	-16.9333	1.56305	-11.173	-0.945326	-19.6802	-9.99793	-20.4879	-6.66317	-3.38736	-19.7597	-8.77066	-18.3451		15.2756	-31.9578	-9.59205	2.90752	5.41778	-9.15006	-12.4665	-3.25212	3.663		27.6899	-10.9926	12.1557	-19.7066	3.82415	5.37078	0.241571	-22.7209	10.3959	-13.2725	-6.75062	-11.9088	-14.2886	-2.66195	-29.0094	-3.5156	-0.150365	15.9895	-7.17101	-3.34022	-20.6668	5.37515	3.25044
	-0.299334	7.82772	-16.1524	-12.9438	-8.97438	-25.5173	-0.523838	-21.9208	-16.8199	-6.17619	-3.76329	-33.5907	-33.5239	-6.46648	-16.7833	-2.06578	-27.4966	-30.1049	-29.9013	-8.21486	-11.7054	-34.4388	-8.69166	6.62009	-12.7296	-29.153	-7.66555		-9.2614	-10.7478	-9.92378	-0.681523	10.5625	-15.7897	-28.9222	-15.0704	8.2125	-11.518	-16.1677	-4.94176	-20.7358	1.25719	-10.2947	-3.30461	-12.5999	-11.0202	-9.78702	-1.2575	-18.1953
	9.69602	0.277415	0.0248974	-14.9381	0.18292	-16.5936	1.02799	-41.6356	-15.7264	4.31871	-19.2925	-12.5374	-5.9442	6.80885	-3.46399	-5.11647	1.68631	-24.4405	-16.438	8.45645	7.17159	-18.6136	12.7369	-19.8637	-26.4089	-14.6309	10.1372	23.8705	1.31904	-19.2933	-8.59233	-4.89012	-0.837437	-12.6433	12.4829	-7.45648	-4.31355	11.3119	7.91185	-3.16165	-11.395	17.6255	8.95801	-7.33407	-13.968	-4.14136	-31.6357	12.8825	-4.96608
	-6.23269	2.31106	-17.1254	-11.073	-31.9095	-40.2553	-17.1703	-15.7447	-9.94253	1.18106	-19.4458	-37.8837	-19.2688	-14.9003	-38.5729	-29.2464	-12.8421	-33.0045	-56.7059	-5.96086	0.886302	-34.4413	-16.9065	-28.7135	-36.0033	-21.6839	-7.84613	-7.57929	-16.1568	-48.7601	-20.1204	1.88043	-10.4792	-28.7767	-23.5092	-6.75314	-9.92377	-10.0745	-13.4258	-34.0257	-27.4725	-1.27793	-12.6497	-17.0739	-9.35517	-30.7366	-16.474	7.3558	-31.9064
	39.9833	51.0092	46.0942	51.4095	10.8348	15.0517	32.567	2.42634	27.8904		14.8612	12.6463	33.7972	36.1242	17.4783	43.5481	73.4606	-3.44922	12.8074	-0.634688	38.9028	9.27812	21.1688	49.2167		44.6924	35.4026	60.553	44.8601	19.3152	-1.28893	49.8131	9.24788	67.3683	34.546	29.8898	43.9842	57.6325	33.9938	23.228	18.717	40.2075	56.9021	32.7472	50.7207	49.1191	27.7673		14.2073
	35.2987	25.6029	10.5306	28.3135	22.8138	-8.48596	9.7412	3.12202	17.9655	20.5306	27.7496	-13.4175	4.77431	7.29113	11.7593	42.1071	28.1764	3.26656	-10.7578	41.5492	30.9882	-12.3279	17.7445	35.0563	18.9879	-0.245934	31.4939	13.164	29.5212	9.7771	29.1043	36.8651	20.526	8.8473	6.86621	6.8828	14.8909	23.6221	26.2204	32.6416	9.80967	41.1203	25.0585	37.7328	37.0267	4.1841	15.9894	42.9128	-16.3196
	-13.2154	3.41962	-8.83206	-7.26143	-24.3853	-40.627	-20.3543	-21.7122	-9.62249	-6.66852	-19.9382	-46.8028	-15.8621	-3.87613	-23.354	1.8045	9.66718	-19.7213	-34.8259	-15.0866	-6.34643	-45.9273	-13.3514	-27.0378	-20.8789	-20.4291	-23.2133	7.16884	-10.138	-31.5849	-21.649	-5.43038	-15.0198	-37.1742	-18.9624	-24.709	-6.75358	-12.0292	-0.268184	-22.8501	-38.8558	-1.59296	-9.11203	-12.9283	-12.7078	-18.2723	-18.2168	-6.77399	-27.0899
	0.21141	0.482452	-0.187529	-0.0876862	-0.413839	-0.869223	-0.0784064	-0.681293	-0.230394	0.139651	-0.105801	-0.652075	-0.579316	0.0615418	-0.621389	0.500842	0.55645	-1.16762	-0.631615	0.0159857	0.394449	-0.957064	-0.227799	0.00180295	-0.0911728	-0.639638	0.449411	0.648272	0.585689	-0.649922	-0.165361	0.479701	0.0355465	-0.452442	-0.20355	-0.453858	0.198087	0.141966	0.135943	-0.255976	-0.83618	0.476897	0.190101	0.0620702	-0.17121	-0.225511	-0.440014	0.496623	-0.342516
	accountant	architect	artist	astronomer	baker	banker	bartender	bricklayer	busDriver	butcher	carpenter	CEO	chef	cleaner	dancer	dentist	designer	doctor	economist	electrition	engineer	entrepreneur	factoryWorker	farmer	firefighter	fisherman	florist	gardener	hairdresser	journalist	judge	lawyer	lecturer	librarian	lifeguard	mechanic	model	newsreader	nurse	optician	painter	pharmacist	photographer	pilot	plumber	police	politician	postman	president
	-22.8331	-18.9782	-25.7585			-10.5174		-1.19031				7.45744			13.8485	13.6957	-22.3338	6.472	-22.798	-34.4196	-15.6864	1.67621	-30.1004		-46.0543				6.8274	9.36485	-1.89574	-0.646588	10.9697	14.0248	-14.1657	4.24855	-4.60613	-16.1877	-18.5825	-24.294	-0.422943	4.85416	-11.1148	-27.9694	-36.2668	-31.61	5.08664	-17.1909	5.78047
	-10.2618	-0.448143	1.07982		-29.6432		15.2749	1.25903	-9.67201	-37.0139	-25.2603	-3.13838	1.99651	0.408734	-18.3296	-2.11421	1.52513	4.91042	-6.73365	0.151432	5.35286	-4.64401	9.36852	-39.6531	-24.5172		-26.4208	-44.4565	3.54139	4.98725	-7.93521		-1.13932	14.6253	-0.965847	23.6526	-2.13021		25.2842	-4.54545	-8.06576	22.5779	6.44608	-13.3398	-1.41317	-32.6538	-6.28492	-4.6844	2.15128
	35.8722	33.6906	50.1306	11.0752		32.8398	45.0969		30.6238		18.9335	21.8672	-9.95123		10.6254	19.0027	37.7464	5.74467	38.234	7.80267	21.2067	47.3045	22.4843						53.869	25.4115	47.8585	39.1589	50.085	41.6024			34.5729	34.7899	31.163	34.4085	45.4484	54.097		43.7887	30.0159	26.4129	22.1814	6.95078	9.82157
	13.4227	-14.2555	10.3487	-13.7657	-27.6857	-7.08187	-1.2582		-3.44829	-38.0915		-0.542152		-23.485		-26.2678	-15.2267	-28.0627	-7.53809	-6.17953	8.15912	-6.72542	-13.3495					-9.16508	-3.56057	8.98577	-11.1256	3.77684	-7.70102		6.07041	-20.3759	18.8366	22.5356	7.96143	-18.3647	11.8786	11.7298	-6.43339	-14.4904	-23.9066	-1.64328	-27.9624	-44.785	-22.2224
	-32.5117	-36.3811	-25.7756	-53.3002	-2.41141	-52.8267	-20.0081	25.1801	-54.9176	-5.97615	-39.356	-49.2854	-25.8039	31.4817	-3.69115	-4.71249	-19.9897	-40.8543	11.8848	6.42778	-40.4377	-11.549	-28.5846	26.4156	-37.3727	-35.1689	30.3796	-9.18481		-11.0633	-14.2812	-0.411899	-0.121174	2.86652	21.4727	-30.1356	4.78043	3.24685	13.3689	-36.9968	-43.939	-6.35159	-0.334768	-47.85	-17.886	-30.1723	4.04886	-37.0733	-14.3093
	-4.7945	18.7997	-16.9506	3.35449	10.5017	10.4603	1.46382	10.2696	-14.8599		9.8452	15.1143	37.7256			21.5635	9.04442	9.3338	5.62825	-12.9222	11.7696	-1.84931	-13.002			-18.2199	41.8343	0.439468	27.6429	-11.9844	23.7623	11.186	2.19793	27.6888	-9.24503	10.0107	2.67496	3.70863	8.61592	20.2146	-1.66999	19.2181	-4.91607	-6.77493	26.7507	-18.6826	-32.995	6.35355	-19.4861
	25.9583		14.3327	20.9176			-5.71073		16.1141			15.1839			23.6678	62.9114	15.6161	27.3508	14.7387	9.46725		1.99453					52.1726		36.959	22.7625	23.9316		26.3353		3.57034	28.0906	19.4753	13.8171	35.3666	7.59434			26.6008	-5.65586	29.4706	5.89257	36.1435	42.7843	-3.57454
		7.15435	22.2567	1.0998	-2.28085	17.4566	25.7713	8.61717	6.249	5.39912	24.9959	14.6644	-12.1403			15.0779		-0.88363	20.4648	-9.95415		11.9122	10.126	20.4424		-8.67906		-4.85683		5.97964	6.90466	6.63576		22.2834	15.6867	14.7089	29.1983	21.7509	1.06881	-1.22687	18.2706	21.983	30.2599	-14.9223	11.6609	-16.0686	4.49728	16.1009	-6.62968
	0.447981	8.21873	3.85174			12.2552	-32.1307		-8.96772			-31.6983	-5.58758		-15.3833	11.8884	2.21487	3.69888	-3.72823	-11.3348	-24.5034	11.342					-0.637818			9.96209	-9.22788	8.0195	5.23711	0.910635		-27.4523	-9.88893	-16.9499	7.84821	-1.24398	-19.2924	8.02175	-15.2885	-16.058	-4.70037	-20.631	13.8804	8.59977	-6.67302
	9.96158	24.2541	26.094	9.28171		7.96279	5.85588	20.8527	-17.8951	16.9		22.1602				23.3508	11.3305	-9.46941	-6.51162		-0.378541	24.2985	33.3808	8.88103			54.3866		45.9287	-4.41767	2.55576	16.4791	-4.69902	10.7648	32.0047	17.8169	13.6789	5.01899	52.2814	-8.63296	-9.04329	15.9896	2.94735	3.20487	11.0123	-9.81492	9.24502	16.2392	14.5395
	14.1532	33.425	14.2047	38.3208	11.6263	3.8623	12.4592	30.8763	-5.44186	48.0343	27.6129	15.3347	-2.92045	35.1178	11.2284	36.2439	40.561	23.9364	22.5545	17.121	9.4269	28.9681	26.05	3.39456	-4.48803	10.5414	21.0911	-2.01268	51.8853	16.6606	19.0467	19.7579	9.17852	9.38117	12.1948	12.7156	10.6423	21.3184	27.0287	12.8154	26.103	23.0706	30.541	-15.7573	27.3202	5.13723	29.4384	24.4447	5.30744
	41.9976	34.205	36.8265	-1.4556	27.5716	-6.26958	22.6836	10.6298	43.6865		21.7323	-16.0408	6.66544	26.0364		27.5618	12.8203	9.55741	22.5009	8.53737	-5.81068	31.1167	3.17727		23.5851	24.4933	51.0432		53.9571	-27.0356	-12.5511	41.5546	39.0849	4.7348	-14.9839	45.3538	40.0678	45.2537	42.1259	33.3913	26.3021	-25.3041		29.5879	25.3753	13.2372	30.1119		9.4493
	-14.4277		-5.02265			-2.82374	13.5873	-4.0568	-31.5889	-4.87347	-7.86699	-24.6829	-21.0385			-18.1733	-2.96595		-12.1927	-11.0734	-13.9193		-6.36485		-47.7173	-26.2749	-17.3392	-34.9163	3.11162	-3.86976	-0.783045	-4.33986	-18.947	24.7558		-2.01447	5.59833	13.2299	2.86836	-5.64071		5.44761		-11.7896	8.72606	-21.8819	3.29411		-14.4339
	-0.0205898	12.4977	-17.4773	-39.0137	23.0442	-5.29139	0.293518	-35.6273	-59.5101		-27.6776	-0.412267	-39.1985		-9.22609	11.205	1.82474	11.7029	-10.4325			-6.81241				-40.1844	29.1737		-1.35363	-42.0403	1.51722	-0.464379	-6.12755	-2.9904	-14.3399	-33.9813	20.6933	11.7494	-6.34441	4.01199	0.934374	5.69384	7.75526		-28.5102	-22.9695	4.02288	-37.1673	-26.0153
	0.020915	-13.9509	-25.9324	-40.2993	-34.8206	-4.97355	6.27297		-10.1713	-9.25513		-34.9763	-33.1044		-0.120015	-12.9878	-12.6958	-29.5005	-29.5616	-17.5974		-1.02356	-27.3489	-52.647		-50.6431	-0.0271913	-44.3041	-13.7677	-1.76393	-8.27671	-15.3547	-18.75	-4.81727		-5.57171	-13.2791	-5.71322	-15.0991	-30.4513	-17.2201	-11.8342	4.99844	-44.2111	-13.4546	-10.1148	-35.2896	-32.4699	-15.1448
	22.6314	42.3064	27.1657			39.4642	17.6542			9.8812		52.8914	5.74368	56.3786	15.5616	24.4096	24.9768		44.6973		16.9025			15.3505	26.7278				43.7508	26.5696	52.4144	52.3904	53.8335	59.2449	36.2963	44.7578		46.503		51.8229			63.1081		41.6635	19.4396	52.4345	42.3077	64.7835
	43.5477	35.1475	12.6279	44.7701	46.2861	21.8205	37.0377	18.4297	11.8707	53.7207		17.5154	40.1483	57.488	30.9295	75.6262	51.0056	20.8017	29.4435	50.0982	20.4921	22.8976	56.4743	32.7924			57.42	42.3378		6.7833	37.8671	35.8078	36.384	46.7253	29.472	32.5305	71.3434	27.8575	66.9871	36.4002	38.4701	38.535	36.163	34.2192	27.309	23.7762	2.15968	15.9501	31.4666
	-1.2305	-2.51186	12.6848	10.6778	-13.1479	17.6693	4.14313	-28.8222	-32.2036	-12.5568		-7.391	21.302		-4.31873	19.2323	-5.32166	-13.0263	-9.56994	-12.2862	11.7106	-7.48854	-28.2769	-15.7546	-28.7931	-35.6344	12.785	-1.66473	-2.81153	-29.3042	1.63449	-14.9794	25.3184	-0.71494	7.85251	0.589697	10.9565	14.1318	8.44001	-7.46233	-5.27345	23.7536	-14.899	-11.2388		-7.39362	-4.67372	-7.11858	-10.1521
	0.338705	0.45326	0.318575	-0.0231583	0.0251121	0.205574	0.412463	0.156716	-0.389256	0.0726895	0.00821912	0.0389487	-0.100454	0.509518	0.152201	0.826426	0.361478	0.00475611	0.280779	-0.0448934	0.0119011	0.392828	0.0389837	-0.00216171	-0.385083	-0.499361	0.849614	-0.299399	0.849944	0.0166335	0.4206	0.551583	0.55872	0.753017	0.308111	0.31929	0.701708	0.683502	0.806618	0.171668	0.173556	0.58745	0.432871	-0.331269	0.314352	-0.36039	0.303719	-0.00210658	0.0129402
	accountant	architect	artist	astronomer	baker	banker	bartender	bricklayer	busDriver	butcher	carpenter	CEO	chef	cleaner	dancer	dentist	designer	doctor	economist	electrition	engineer	entrepreneur	factoryWorker	farmer	firefighter	fisherman	florist	gardener	hairdresser	journalist	judge	lawyer	lecturer	librarian	lifeguard	mechanic	model	newsreader	nurse	optician	painter	pharmacist	photographer	pilot	plumber	police	politician	postman	president
	-1.93173	0.627419	-9.46283	14.6719	-8.96568	-6.89667	-7.54384	3.54598	-33.6608	8.85526	-23.623	-4.80702	-20.4592	-21.6588	5.45205	8.31956	-4.90591	-11.3497	-16.0144	-18.4885	-0.750287		-14.7734	-25.9897	-35.0545	-16.1511	12.0423	-20.0345	-2.08549	3.09049	-5.22568	-3.14983	0.272443	-0.958148	-3.7546	0.56877	1.44873	-9.17192	-13.4672	-2.45255	-8.11021	-19.0002	-13.3631	-11.4311	-17.2809	-28.959	15.9464	-12.3024	-19.1977
	-6.35075	0.868357	-17.9574	-7.90857	-23.9217	-20.0746	-5.94713	17.441	-27.2525	4.30343	-12.7737	-11.0423	-24.8252	-22.2113	19.9633	-5.72176	-12.6461	-21.0641	-36.1286	-11.5137	-20.7094	-8.18625	-20.8859	-3.67732	-22.3365	-3.66402	-12.8603	-10.539	5.32713	-1.55662	-4.99651	-15.382	5.84507	-12.2174	-13.9928	-17.9488	-2.79551	-6.83692	-17.8244	-6.08977	-24.0348	-5.91441	-11.6962	-26.8625	-10.0272	-16.0403	-1.24867	-4.8385	-16.7117
	29.077	34.0607	25.7834	37.3007	23.2616	32.9559	26.858	36.1616	2.48556	37.3679	28.0495	0.706657	8.2207	19.7212	33.5135	36.8574	16.3172	18.0332	21.0129	17.1215	31.2266	25.5658	28.4768	12.9897	19.1162	27.7977	18.6871	22.4695	23.7599	40.7406	33.7099	22.706	16.9109	20.0377	30.8315	30.249	28.515	23.7617	19.4219	26.5891	24.3977	24.295	29.1955	16.0268	32.4166	-0.614813	31.2912	28.6785	24.9741
	-27.4118	4.48697	-25.6541	-39.9991	-29.5923	-0.497969	-22.222	-21.135	-33.8413	-10.9225	-30.5952	-4.7755	-43.3686	-57.0804	-21.0546	-23.1547	-35.9508	-31.2754	-47.2022	-37.6051	-28.9293	-10.4364	-50.6138	-44.8117	-43.8982	-27.4479	-21.3981	-41.5913	-27.8152	-8.79992	-24.5287	-32.0937	-27.071	-32.7699	-40.307	-31.0604	-24.5166	-24.5247	-36.9392	-22.2155	-24.3275	-21.2296	-34.7848	-38.0278	-28.948	-46.7614	-15.9905	-37.7579	-35.5985
	-6.05293	11.1278	-11.5154	15.7743	-11.6762	-10.9038	-2.84777	10.4398	-24.7242	19.2689	-8.06083	11.9279	-21.2312	-15.1408	2.86216	-0.501848	-11.0373	-14.9727	-7.8725	-11.9467	-6.22315	-5.04351	-19.6232	-10.013	-23.6803	-6.09849	2.79423	-8.78032	5.73593	-12.1838	-8.37946	-6.74873	2.11986	0.240878	-4.97268	-3.70003	-9.22907	-0.822078	-18.8908	7.85113	-2.90437	-5.04973	-18.7302	-23.2969	6.12596	-29.8506	12.347	-20.014	2.35756
	9.51827	-7.83387	-4.01618	2.20883	-17.1561	1.30127	8.27324	9.62296	-26.6518	13.0789	-5.56001	4.09326	-7.18574	-0.670678	9.74391	-10.134	-9.2707	-1.65927	-21.0183	-8.30076	-6.75291		-21.3968	-9.24783	-10.7058	-9.38929	13.0901	-7.51855	-3.3378	12.8781	-6.63112	-5.07807	3.34956	9.70989	-5.73878	2.14813	-10.1146	6.26024	-2.41832	14.8142	-10.1916	10.8838	-6.05753	-1.69824	4.87258	-17.9103	21.7065	1.16695	-1.77618
	12.2035	12.907	6.25017	28.1971	6.04684	19.497	1.83292	17.1307	0.595874	16.2736	-3.47279		-6.01554	5.06472	11.3025	9.88664	7.95361	1.0225	6.33883	-1.35631	20.8149	0.302553	1.37281	7.34778	-4.97492	-2.52115	4.56638	2.87141	15.6966	21.4357	13.3348	11.5885	24.1271	13.8436	13.1974	11.8078	6.92381	12.6369	17.991	25.7321	19.1184	-2.13652	7.69275	3.67678	10.6523	-0.654972	29.9633	4.34643	-8.31154
	14.0928	9.65423	-1.37165	2.78397	1.10215	18.4906	9.04279	10.8519	-8.0463	13.0803	4.82497		-11.5769	-8.71454	-0.0516279	10.1456	-4.74674	1.73132	-17.0844	3.28162	11.6739	-5.70356	-4.55605	8.36882	-3.66935	4.61445	10.5452	3.05588	9.26991	18.0939	-1.80883	8.30423	19.5103	18.2915	17.4384	0.243002	10.5771	21.7726	10.3647	17.6064	9.21611	5.07098	7.79397	16.2368	17.7319	-0.701662	29.0713	12.9733	-6.08148
	-9.11583	-9.35742	-10.7708	-8.32938	-14.6446	4.61953	-8.44935	-3.56464	-17.1958	-1.62925	-15.7327	9.11687	-15.2849	-18.8332	-3.53012	-2.22731	-2.57987	-10.6207	-28.9103	-10.6902	-12.0201	12.4481	-9.40804	-2.63998	-16.3449	-15.0363	1.46645	-15.8791	-10.282	5.15011	-11.2161	-7.41096	-11.5279	-3.55307	-13.9068	-9.14912	-2.70391	0.447457	-10.6103	-5.33055	-17.6056	-5.23843	-16.9984	-12.4441	-10.3166	-15.0561	4.6493	-9.69992	-41.4131
	7.20698	6.87457	-10.7558	8.43357	-9.30118	-17.2458	2.89039		-19.182	16.3373	4.11262	-9.04767	3.50022	-14.5485	-12.679	16.1824	3.11038	-0.207999	-24.4063	-0.943216	1.39073	-11.3216	-1.99808	-5.20691	-5.18218	1.55113	-14.8354	0.811219	-12.9394	5.11494	0.961165	-2.23991	28.1466	-4.07959	13.302	2.11904	-18.2757	4.22414	-1.62844	25.072	-3.36424	2.12	-0.333433	3.41165	5.22071	-7.34745	17.1248	2.49777	-35.2903
	4.61865	18.0458	-10.5999	7.14724	-4.42663	17.7927	5.4136	20.9097	-9.57828	8.53821	-3.15959	16.2031	-9.20134	-19.2738	5.96955	14.5043	-1.48496	13.2615	-11.3726	7.58571	3.08624	0.981304	-7.64709	4.12084	2.40168		2.66852		9.07939	14.2577	3.60638	5.15758	23.4367	7.09633	10.0424	12.9036	-1.22434	17.7603	0.102361	16.3857	3.14096	-0.140881	1.64165	11.8376	7.28644	-4.40374	13.4067	15.8513	-12.9752
	3.01448	-4.05661	5.53561	5.30506	-2.80771	14.0884	1.55799	12.0532	-7.61355	11.7738	-4.93666	9.71156	-12.4306	-4.54739	0.442713	11.6418	-13.3891	-1.27581	-11.7741	-12.3978	-1.08418		-7.31816	-2.20399	-2.35245	-5.30254	3.93683	-10.949	4.14689	10.7759	-0.746271	-5.25774	17.1041	7.23706	-4.10805	6.60195	20.7413	9.43438	5.44245	16.7423	-13.0324	-0.918505	1.27974	-3.87756	1.29423	-13.8537	25.1642	-2.81535	-32.3717
	-21.1928	-13.7403	-26.2429	-6.6674	-22.44	-10.2265	-12.949	-5.7555	-22.7241	-2.55738	-23.4445	-22.386	-26.1046	-23.276	9.49088	-18.8994	-22.6923	-21.4688	-33.6184	-24.42	-10.3476	1.62048	-27.5202	-11.9522	-43.3006	-11.005	-18.4547	-15.6037	-17.1842	-8.13337	-18.1274	-24.5048	-16.7124	-20.8017	-9.17248	-13.8829	-12.0176	-2.87435	-18.286	-7.02762	-26.3566	-10.386	-15.7841	-14.6532	-22.3661	-29.835	1.72677	-22.5527	-26.6142
	4.99009	8.27508	-16.2072	3.43765	-13.8187	-17.6447	3.58028	3.37529	-21.2267	1.78462	-4.33383	-3.85255	-16.7784	-11.2174	10.7733	6.61859	-16.994	-17.519	-38.7335	-4.51	7.63059	-24.3885	-9.45781	-6.24519	-11.9389	-13.8975	4.02467	-4.50179	-1.44283	8.88069	-5.39572	-10.8687	-7.31896	-6.93041	-10.9664	0.221445	-15.3951	-8.74545	-5.50898	3.9369	-8.8652	10.5281	-1.75151	-10.6684	-13.5451	-20.2843	16.3144	-3.64937	-27.0397
	-27.6536	-12.2913	-25.0181	-25.3838	-30.5006	-43.4945	-15.6799	-9.59224	-27.5944	-20.9887	-24.5284	-2.83358	-39.6104	-33.496	-16.6358	-18.5563	-32.7522	-39.6702	-27.0032	-22.0506	-21.3349	3.38721	-26.4824	-29.6343	-35.7821	-23.2583	-26.2728	-26.6566	-21.4153	-24.7739	-24.3664	-25.8179	-20.012	-22.4127	-23.3349	-32.5228	-21.0051	-6.81813	-35.3793	-12.3863	-18.0749	-32.6281	-19.9391	-26.6807	-24.841	-23.8003	-12.9481	-18.6235	-22.584
	32.0643	37.316	22.0372	39.2871	25.8013	26.0793	31.2983	40.6678	10.8636	39.8164	31.6911	43.8366	23.8119	23.9481	26.7381	19.6164	30.6176	23.796	9.36625	27.672	22.1272	33.9523	32.9306	32.9615	6.36285	35.3077	42.4863	28.2247	33.3634	40.2611	31.305	30.7905	46.5898	28.1783	23.4343	34.028	26.1776	32.0251	23.0092	47.025	31.2406	42.5515	22.9223	23.8425	36.9843	2.95704	43.878	31.2658	-10.7715
	13.8528	28.7332	-6.20785	7.72703	-2.27845	8.7451	9.84812	9.8872	-8.77889	8.65603	9.19262	28.6731	-7.91596	-6.51873	-8.71659	2.86004	-3.39163	-7.2231	2.74821	5.38104	5.72781	13.3272	1.69768	-8.10321	-3.89911	-8.87068	7.10658	0.241463	25.7879	15.7772	9.66714	4.90312	7.06229	6.82787	0.859754	-0.526405	4.87969	11.4414	-0.900709	22.3921	1.99249	4.11018	1.82216	-5.25739	6.97097	-2.56436	16.0137	6.8436	-7.41617
	-21.2621	-14.1912	-32.7159	-14.9047	-26.1825	-17.5545	-20.3771	-3.08259	-50.0689	-12.0683	-26.9778	-18.8409	-37.092	-27.3397	-13.6647	-26.7769	-21.1997	-32.9513	-17.2435	-20.4318	-8.80205	-1.55728	-41.8764	-37.9303	-32.8555	-35.2362	-21.0137	-29.7885	-16.5725	-10.9333	-27.14	-25.3869	-20.5686	-21.5062	-18.3835	-21.4396	-30.5925	-27.5163	-24.4771	-5.82855	-20.9849	-17.3428	-17.4111	-31.5196	-25.0187	-37.2076	-6.45541	-20.7751	-16.9309
	0.0268541	0.309741	-0.413582	0.191893	-0.448612	-0.00269221	0.0127207	0.41377	-0.90054	0.419357	-0.30369	0.129677	-0.732077	-0.654981	0.166443	0.0851679	-0.375118	-0.426149	-0.830323	-0.343369	-0.0368779	0.0692995	-0.552999	-0.366297	-0.744707	-0.301687	0.0238325	-0.372689	0.0530341	0.361321	-0.127716	-0.223581	0.253511	-0.0382393	-0.109812	-0.0814978	-0.135019	0.145706	-0.305553	0.452267	-0.246516	-0.0567378	-0.234726	-0.364959	-0.0632987	-0.813579	0.672113	-0.137236	-0.815979
[truncated: 13 more columns]

## Sheet: Sheet2
sd1.5	accountant	architect	artist	astronomer	baker	banker	bartender	bricklayer	busDriver	butcher	carpenter	CEO	chef	cleaner	dancer	dentist	designer	doctor	economist	electrician	engineer	entrepreneur	factoryWorker	farmer	firefighter	fisherman	florist	gardener	hairdresser	journalist	judge	lawyer	lecturer	librarian	lifeguard	mechanic	model	newsreader	nurse	optician	painter	pharmacist	photographer	pilot	plumber	police	politician	postman	president
变浅count	5	7	6	3	5	8	3	7	3	7	5	6	3	2	4	9	4	4	9	6	6	5	4	2	4	4	11	10	9	6	5	3	4	3	4	9	9	2	8	3	12	4	3	3	7	8	6	2	5
变深count	2	1	6	12	5	1	9	3	5	5	6	2	6	6	5	0	8	5	2	4	1	3	6	9	3	8	1	0	2	2	3	11	2	12	7	2	3	7	2	4	1	6	6	0	2	1	3	5	7
sd2.1	accountant	architect	artist	astronomer	baker	banker	bartender	bricklayer	busDriver	butcher	carpenter	CEO	chef	cleaner	dancer	dentist	designer	doctor	economist	electrician	engineer	entrepreneur	factoryWorker	farmer	firefighter	fisherman	florist	gardener	hairdresser	journalist	judge	lawyer	lecturer	librarian	lifeguard	mechanic	model	newsreader	nurse	optician	painter	pharmacist	photographer	pilot	plumber	police	politician	postman	president
变浅count	5	6	4	4	3	1	4	1	2	4	4	1	2	4	3	6	8	0	1	4	6	0	4	3	5	1	10	6	9	1	3	6	3	2	5	1	4	5	5	3	1	8	3	5	3	2	4	6	3
变深count	3	0	8	8	6	11	4	11	4	3	5	10	12	2	11	1	3	15	8	3	3	11	8	6	5	13	2	1	3	10	4	0	2	12	7	8	1	7	4	6	12	0	4	4	9	9	9	0	7
SDXL	accountant	architect	artist	astronomer	baker	banker	bartender	bricklayer	busDriver	butcher	carpenter	CEO	chef	cleaner	dancer	dentist	designer	doctor	economist	electrician	engineer	entrepreneur	factoryWorker	farmer	firefighter	fisherman	florist	gardener	hairdresser	journalist	judge	lawyer	lecturer	librarian	lifeguard	mechanic	model	newsreader	nurse	optician	painter	pharmacist	photographer	pilot	plumber	police	politician	postman	president
变浅count	7	8	10	5	5	7	8	6	4	3	4	8	3	5	6	13	7	4	8	2	5	7	5	4	2	2	9	1	7	4	6	7	7	9	6	9	10	11	8	6	6	9	5	3	9	4	6	6	3
变深count	3	3	4	4	4	1	2	2	7	3	3	5	5	1	2	3	3	4	3	5	3	1	5	3	4	6	2	3	1	5	3	2	2	0	2	4	1	1	1	3	3	2	2	9	4	8	3	4	7
midjourney	accountant	architect	artist	astronomer	baker	banker	bartender	bricklayer	busDriver	butcher	carpenter	CEO	chef	cleaner	dancer	dentist	designer	doctor	economist	electrician	engineer	entrepreneur	factoryWorker	farmer	firefighter	fisherman	florist	gardener	hairdresser	journalist	judge	lawyer	lecturer	librarian	lifeguard	mechanic	model	newsreader	nurse	optician	painter	pharmacist	photographer	pilot	plumber	police	politician	postman	president
变浅count	5	6	2	5	2	6	2	8	1	8	2	4	1	2	5	6	2	3	1	2	4	4	2	2	1	2	5	2	4	8	3	3	7	4	6	4	4	6	4	9	3	4	2	4	4	0	12	4	1
变深count	4	3	10	3	9	7	4	1	10	3	6	3	10	10	4	5	8	8	12	8	5	3	7	5	9	6	6	7	6	3	5	6	5	5	6	5	7	2	7	2	8	4	7	8	7	10	2	5	11
sd1.5	accountant	architect	artist	astronomer	baker	banker	bartender	bricklayer	busDriver	butcher	carpenter	CEO	chef	cleaner	dancer	dentist	designer	doctor	economist	electrician	engineer	entrepreneur	factoryWorker	farmer	firefighter	fisherman	florist	gardener	hairdresser	journalist	judge	lawyer	lecturer	librarian	lifeguard	mechanic	model	newsreader	nurse	optician	painter	pharmacist	photographer	pilot	plumber	police	politician	postman	president
变浅count	157.71	161.383	185.484	77.5123	141.819	201.751	85.0537	160.483	226.249	180.712	249.509	191.826	69.673	66.8196	107.07	232.615	97.9035	81.7627	262.457	566.17	157.142	188.561	144.913	47.5993	115.541	468.951	236.398	314.991	188.383	314.921	141.414	118.128	131.365	79.3881	68.0328	308.521	238.636	70.3782	126.034	84.8969	316.522	75.8099	92.6813	246.666	194.234	239.145	150.647	66.6008	159.768
变深count	-28.6847	-18.4357	-91.9138	-317.429	-97.0573	-11.7264	-153.383	-57.2125	-99.2194	-83.4654	-119.447	-26.0147	-105.91	-136.825	-103.222	0	-154.235	-78.7156	-29.7226	-50.2556	-10.134	-58.5777	-96.221	-195.315	-43.4901	-157.393	-48.0863	0	-41.9875	-29.5318	-46.0102	-205.438	-34.3975	-223.989	-186.769	-33.8391	-44.9767	-129.865	-41.7328	-62.0522	-10.6876	-108.029	-111.729	0	-26.977	-66.419	-37.9488	-84.5249	-149.556
sd2.1	accountant	architect	artist	astronomer	baker	banker	bartender	bricklayer	busDriver	butcher	carpenter	CEO	chef	cleaner	dancer	dentist	designer	doctor	economist	electrician	engineer	entrepreneur	factoryWorker	farmer	firefighter	fisherman	florist	gardener	hairdresser	journalist	judge	lawyer	lecturer	librarian	lifeguard	mechanic	model	newsreader	nurse	optician	painter	pharmacist	photographer	pilot	plumber	police	politician	postman	president
变浅count	140.603	151.716	97.5597	123.456	43.9542	15.0517	70.8679	19.4686	45.8558	102.81	74.5411	12.6463	55.9471	85.7107	49.4104	207.264	228.216	0	12.8074	82.8283	147.913	0	81.1782	98.4423	84.8631	44.6924	217.504	202.942	230.76	19.3152	54.1834	168.197	44.4568	78.4048	96.8436	29.8898	132.6	139.392	114.931	66.4178	18.717	184.851	132.441	129.896	128.684	61.8161	67.5781	162.405	53.6786
变深count	-43.9271	0	-150.906	-139.811	-196.287	-308.991	-101.899	-258.846	-76.1063	-47.503	-107.214	-256.379	-272.34	-46.1857	-270.685	-29.2464	-52.2633	-420.16	-226.137	-58.0281	-34.3216	-333.956	-148.408	-110.217	-120.618	-264.299	-34.1804	-10.9926	-36.574	-262.855	-86.755	0	-25.4991	-237.03	-147.129	-155.849	-21.7677	-89.6939	-63.9638	-142.038	-327.96	0	-52.7015	-82.065	-162.737	-145.055	-196.461	0	-163.392
SDXL	accountant	architect	artist	astronomer	baker	banker	bartender	bricklayer	busDriver	butcher	carpenter	CEO	chef	cleaner	dancer	dentist	designer	doctor	economist	electrician	engineer	entrepreneur	factoryWorker	farmer	firefighter	fisherman	florist	gardener	hairdresser	journalist	judge	lawyer	lecturer	librarian	lifeguard	mechanic	model	newsreader	nurse	optician	painter	pharmacist	photographer	pilot	plumber	police	politician	postman	president
变浅count	197.583	234.326	226.672	125.761	119.03	151.966	189.565	116.238	102.295	118.655	93.2745	174.732	99.1759	206.503	105.861	361.769	194.057	83.7919	204.519	67.2191	82.0815	177.84	148.515	95.0009	50.3129	35.0347	350.286	42.3378	313.993	91.4043	204.88	216.335	242.011	261.716	147.127	229.637	269.465	272.937	293.606	189.053	166.473	230.955	186.673	107.596	230.578	82.8659	184.19	157.827	110.79
变深count	-80.0343	-83.5656	-111.894	-146.379	-105.297	-63.3441	-52.1387	-64.4494	-221.147	-87.6623	-92.2939	-156.684	-131.286	-23.485	-33.7129	-57.4289	-70.2461	-111.444	-74.9848	-99.6336	-94.5468	-11.549	-140.662	-108.055	-184.455	-206.126	-43.76	-123.677	-13.7677	-121.428	-37.9579	-30.3341	-37.6971	0	-43.4895	-111.945	-13.2791	-33.1376	-33.6816	-110.107	-80.4515	-37.1382	-41.3024	-217.627	-120.024	-204.784	-96.247	-168.686	-121.764
midjourney	accountant	architect	artist	astronomer	baker	banker	bartender	bricklayer	busDriver	butcher	carpenter	CEO	chef	cleaner	dancer	dentist	designer	doctor	economist	electrician	engineer	entrepreneur	factoryWorker	farmer	firefighter	fisherman	florist	gardener	hairdresser	journalist	judge	lawyer	lecturer	librarian	lifeguard	mechanic	model	newsreader	nurse	optician	painter	pharmacist	photographer	pilot	plumber	police	politician	postman	president
变浅count	101.29	142.191	47.8206	135.231	49.0629	128.904	58.1563	165.656	10.8636	166.997	59.7405	100.641	23.8119	43.6693	102.291	108.948	46.9349	55.0907	21.0129	44.7935	85.8425	85.2934	61.4073	45.9512	19.1162	63.1054	96.8509	50.6942	98.6078	174.22	78.3498	65.085	175.826	80.351	108.246	88.9884	86.0109	119.398	70.7867	212.359	74.7568	88.2583	52.1178	67.9437	97.7851	0	272.227	88.7689	24.9741
变深count	-97.5202	-40.2228	-187.438	-80.2876	-189.933	-137.144	-71.2281	-21.135	-304.123	-43.9795	-157.675	-52.2691	-268.762	-264.076	-64.0341	-97.5213	-166.661	-200.892	-330.51	-169.544	-93.3413	-46.1465	-223.172	-160.331	-275.897	-142.032	-114.835	-171.042	-106.209	-47.8909	-105.379	-134.054	-95.8919	-109.708	-120.891	-116.854	-131.917	-52.041	-175.874	-34.6017	-154.608	-100.587	-148.707	-195.584	-152.343	-279.559	-28.9385	-132.026	-297.499
[truncated: 13 more columns]
