# Supplementary material
Source: ML conference proceedings conference paper supplement (https://openreview.net/forum?id=P66QvdCPjE)
Supplement: supplementary_material [file sd15_age_behavior.xlsx]

## Sheet: Sheet1
-47	-52	8	-37	-10	-16	-4	2	-13	14	-44	-53	-12	-53	-53	-52	15	-15	-26	20	-35	-22	-34	-42	-30	-38	15	-36	10	-39	-11	-37	-38	-18	-14	-21	1	-54	13
-36	-37	-37	-42	-26	-37	-36	-27	-39	-31	-20	-39	-31	-32	-56	-41	-40	-15	-4	2	-30	-12	-29	-37	-24	-16	-5	-30	-35	-33	-36	-33	-25	-34	-31	-29	-24	-32	-31
5	-13	-10	-11	-32	14	-1	12	-16	11	-3	-6	-9	-5	-11	-11	5	0	13	-4	-12	-2	11	-28	5	17	24	4	-5	20	-3	-7	-9	8	3	-4	-4	0	28
-21	-43	-35	-31	-43	-37	-44	-27	-36	-29	-45	-26	-28	-35	-40	-39	-34	-42	-41	-38	-37	-14	-23	-42	-29	-15	11	-25	-38	-31	-27	-41	-41	-31	-37	-36	-16	-34	-15
-36	-44	-17	-5	-34	-27	-52	1	-33	-16	-34	-31	-37	-29	-39	-26	-16	-38	-31	17	-32	1	5	-48	-5	-24	-18	-33	-45	-22	-46	-27	-17	-31	-30	-31	5	-42	-20
3	-22	22	21	3	-8	-9	44	6	22	5	-3	2	7	-16	-14	-2	14	5	42	6	53	2	3	32	11	45	-1	16	24	-2	-2	6	7	16	25	42	-1	7
-33	-64	-37	-34	-38	-22	-21	-9	-38	-40	-33	-37	-41	-35	-32	-4	0	-23	-39	3	-33	3	-6	-55	-49	-50	-8	-35	2	-10	-43	-36	-28	-34	-22	-41	7	-36	-64
-14	-16	-12	-7	-18	-16	10	13	-10	14	-17	-16	8	-16	-18	0	-14	-16	-11	4	-4	26	5	-15	23	-18	21	-8	26	-9	-1	-9	1	-17	20	-11	15	-6	1
5	15	-5	-4	-10	-1	-9	37	-8	9	-12	-5	11	2	-8	-2	-2	-2	-8	1	-1	-2	-1	-5	6	5	-2	-6	-10	5	-7	-4	2	-4	-6	-4	1	-1	3
-50	-77	-52	-54	-48	-38	-52	-24	-45	-52	-57	-54	-46	-53	-58	-47	-50	-47	-51	-15	-57	-46	-49	-28	-40	-50	-54	-52	-47	-51	-53	-46	-54	-48	-54	-50	-18	-39	-47
-12	0	-9	-17	-11	-11	-14	0	-12	-15	-19	-14	-13	-10	-14	9	-15	-10	-17	11	-12	-3	-16	-5	-6	6	-10	-10	-14	-6	-14	-11	-13	-15	-12	-13	-13	-4	-13
-3	-10	6	-2	1	-5	-8	16	-1	-4	2	-6	4	-1	-7	-2	0	-1	-5	-1	2	-2	0	-5	-3	-11	37	-5	-15	30	1	2	20	-4	4	1	-3	-1	11
-53	-61	-55	-58	-55	-38	-57	-25	-56	-58	-54	-52	2	-53	-45	-18	0	-39	0	-54	-39	17	-3	-56	-32	-58	-19	-7	-58	-37	-56	-38	-3	-57	13	-9	14	-56	0
-3	-9	-14	-10	-18	-1	-6	17	-11	5	5	-17	13	-2	-31	-16	-14	2	6	28	-5	17	15	-9	2	-4	13	7	-16	9	-14	-13	-2	-11	-5	-13	4	-11	-2
1	-20	-9	-7	8	5	-3	27	2	24	-9	-5	18	15	-8	23	14	1	5	17	1	13	19	-1	17	20	17	1	0	8	2	9	-1	14	0	6	-1	21	19
-64	-32	-58	-4	-60	-27	-48	-52	-50	-21	-12	-13	-78	-74	-7	-78	-15	-29	-50	-71	-51	-10	-53	-16	-4	-15	-7	-21	-6	-18	-59	-47	-19	-9	-14	-65	-10	-39	-75
-28	-23	-32	-31	-32	-30	-22	-16	-32	-25	-43	-26	-22	-29	-30	-31	-30	-33	-29	-14	-30	-30	-21	-25	-12	-30	33	-32	-30	-25	-34	-27	-19	-25	-29	-31	0	-32	-30
19	13	0	-5	4	1	6	12	-5	-1	-7	-2	1	-3	-7	-2	-3	0	-6	29	-7	-1	0	0	-5	-7	13	-2	-4	10	-4	-3	2	1	-4	-4	10	-3	-6
