# Supplementary material
Source: ML conference proceedings conference paper supplement (https://openreview.net/forum?id=P66QvdCPjE)
Supplement: supplementary_material [file sd15_age_item.xlsx]

## Sheet: Sheet1
4	16	-29	-37	-23	13	-18	-10	-31	-31	7	-45	-17	17	-37	-58	-34	-3	4	-45	12	15	4	-31	-19	1	6	-28	-9	6	10	10	-12	-28	-28	-15	-32	-32	-36	7	9	-19	-35	1	-29	-15	-24	-27	-33	-35
-37	-10	-29	-36	-27	-22	-38	-29	-40	-40	-38	-29	-24	-39	-38	-36	-26	5	-37	-24	-62	-30	-22	-36	-36	-29	-37	-37	-33	-34	-30	-30	-35	-31	-31	-37	-39	-39	-38	-33	-34	-32	-36	-35	-29	-40	-35	-32	-28	-41
-7	12	-14	-14	-11	-7	2	-3	2	2	-5	6	-6	9	-12	-4	9	-2	-1	-5	19	2	1	16	-11	4	-11	-3	10	-12	9	9	-14	-5	-5	-11	-14	-14	-5	2	-7	5	-8	-7	-8	-11	-9	-7	3	-14
-38	-37	-46	-31	-43	-41	-32	-31	-41	-41	-33	-41	-43	-31	-43	-40	-38	-41	-31	-34	-32	-24	-30	-19	-45	-40	-35	-41	-32	-23	-37	-37	-44	-41	-41	-42	-37	-37	-43	-29	-27	-38	-40	-44	-43	-39	-43	-38	-40	-38
-32	-25	-36	-35	-25	-18	-8	9	-23	-23	-4	-3	2	-59	-34	-16	-38	-34	-28	-35	-23	3	-5	-29	-35	-13	10	-33	-16	-26	-33	-33	-34	-30	-30	21	-36	-36	-36	-2	-28	-37	-21	-33	-29	-34	-35	-29	-38	-33
8	43	-15	13	10	11	10	3	5	5	51	2	8	-22	5	15	48	39	6	-1	7	43	40	-2	12	30	23	18	13	30	8	8	2	33	33	10	-1	-1	4	9	36	9	6	38	1	-1	1	13	5	-5
-44	5	-64	-28	-19	-40	-37	-32	-13	-13	-11	-46	-24	-38	-7	-64	-2	-41	-24	-31	-26	-14	-32	-42	-41	-64	-64	-23	-38	-31	-39	-39	-29	-32	-32	-8	-44	-44	-45	4	-14	-33	-41	-39	-32	-35	-41	-33	-43	-34
-14	14	-13	6	3	-3	-5	-6	-16	-16	21	-17	-5	12	-8	4	2	-17	-13	-10	-9	-12	-11	-16	-11	6	-10	1	0	-6	-9	-9	-12	-14	-14	1	-17	-17	-16	-14	4	-12	-11	-1	-15	4	-15	-8	-20	-3
-1	23	-10	-3	-7	-4	-4	-6	-2	-2	2	1	0	5	-11	-5	12	-3	-4	1	4	3	7	1	-7	-4	1	-7	5	10	-2	-2	7	-10	-10	-7	-11	-11	-11	0	-2	2	-1	-4	7	3	5	-8	3	-6
-50	-53	-45	-49	-54	-77	-57	-45	-55	-55	-55	-52	-52	-54	-45	-46	-49	-52	-50	-38	-48	-49	-49	-55	-49	-53	-45	-52	-45	-48	-48	-48	-56	-55	-55	-51	-56	-56	-49	-55	-48	-53	-55	-51	-54	-53	-51	-50	-52	-54
-12	-3	-19	-4	-16	-10	-13	-10	-15	-15	5	-6	-12	-16	-7	-12	-10	-14	-13	-14	-15	-7	3	-15	-14	-13	-13	-12	-9	-8	-12	-12	-15	-11	-11	-13	-9	-9	-16	-12	-11	-17	-10	-14	-12	-15	-14	-3	-9	-15
0	4	5	-1	-5	-1	-2	-2	-4	-4	15	3	3	3	-2	4	6	-1	-3	1	15	9	8	-2	-2	1	4	6	4	3	-4	-4	-2	3	3	0	-1	-1	-1	-3	2	-2	1	-3	-5	4	-1	1	-6	1
-36	12	-61	-61	-36	-58	-27	-59	-38	-38	-4	-56	-32	-50	-1	-61	12	-36	0	-51	-35	11	19	-29	-37	6	5	-2	-48	-4	-57	-57	-39	-54	-54	8	-38	-38	0	-12	-26	-44	-32	-33	-37	-58	-37	-40	-50	-53
-5	8	-16	-13	-17	-2	-7	9	-8	-8	-6	-6	8	19	-8	18	3	-6	20	-9	10	0	-11	17	-8	3	-10	-5	-5	0	0	0	1	-9	-9	-5	-12	-12	-12	-8	-15	1	-15	-10	-8	-16	-16	7	6	-12
24	0	2	-7	-8	-3	-5	1	-1	-1	10	16	-1	13	2	4	14	1	3	13	1	20	1	27	-6	-1	16	18	19	-1	9	9	50	16	16	23	-8	-8	-7	29	22	4	1	-2	-5	10	-7	29	7	0
-78	-26	-78	-25	-78	-78	-78	-78	-43	-43	-8	-8	-38	-43	-6	-37	-30	-57	-78	-47	-78	-4	-19	-78	-42	-13	-20	-10	-50	-38	-72	-72	-44	-75	-75	-36	-53	-53	-39	-9	-17	-30	-43	-50	-1	-13	0	-44	-55	-71
-25	-21	-53	-22	-29	-29	-28	-26	-32	-32	-22	-26	-29	-26	-26	-29	-19	-22	-27	-31	-23	-5	-32	-31	-28	-30	26	-28	-26	-19	-31	-31	-30	10	10	-27	-32	-32	-33	-32	-30	-24	-31	-32	-30	-29	-25	-28	-32	-31
-4	11	0	-4	-1	-3	-5	3	-2	-2	-6	-4	11	-3	-4	-8	7	-8	1	0	-28	8	11	4	-3	-2	-3	16	-7	-4	11	11	-6	-5	-5	17	-2	-2	-3	-5	-3	-5	15	-1	-4	-7	-1	7	-5	-7
[truncated: 7 more columns]
