# Supplementary material
Source: ML conference proceedings conference paper supplement (https://openreview.net/forum?id=P66QvdCPjE)
Supplement: supplementary_material [file sd15_age_personality.xlsx]

## Sheet: Sheet1
11	-51	20	17	-22	13	23	1	19	-56	3	17	20	17	6	-46	-8	-24	7	21	25	17	17	-48	21	21	6	19	-55	22	16	25	24	-52	18	19	8	-53	22	21	18	18	-3	17	-13	18	-54	14	21	23
17	19	17	-8	1	20	26	-19	-6	-46	-62	18	27	-31	11	22	20	-31	16	25	26	21	16	8	20	18	12	15	16	22	13	17	20	11	20	-3	16	15	22	21	27	-37	-40	18	17	22	16	-9	-2	9
12	-8	21	18	23	-23	49	5	-8	-16	33	-10	14	-29	29	32	-22	-5	24	36	28	39	37	-22	-29	36	2	46	35	-12	41	45	45	26	35	27	2	46	32	-6	35	18	-17	43	30	42	-1	-23	6	-27
-10	18	9	-7	-4	-19	24	-39	-27	-43	7	-2	8	30	10	8	13	25	12	2	3	17	0	1	17	10	10	15	14	11	10	14	27	-6	14	13	18	10	17	19	10	14	-41	10	11	15	14	2	-1	13
24	22	23	6	-44	5	28	-33	20	-50	14	16	16	22	19	24	27	24	17	27	30	19	23	10	22	19	22	22	32	36	18	17	23	1	21	20	19	23	24	20	23	21	-38	19	23	20	19	16	15	34
28	58	61	61	43	56	62	1	26	18	20	51	56	15	54	46	56	-9	59	51	53	60	62	7	58	59	59	66	62	61	46	63	61	60	53	55	61	53	59	64	56	54	0	56	63	56	57	31	61	37
26	19	25	12	17	15	22	-35	17	-53	12	10	9	20	13	17	23	21	14	11	26	21	19	-16	18	16	13	20	16	22	9	15	19	8	14	8	16	7	15	21	8	13	-8	14	19	14	10	11	16	16
20	37	34	29	16	29	44	-7	-6	-15	9	25	34	37	37	22	41	36	40	32	41	36	34	35	43	39	22	46	37	38	41	30	41	21	29	36	30	33	41	45	35	40	-9	35	42	44	33	-4	32	41
2	47	43	18	3	37	54	-10	21	-6	33	32	34	50	33	34	55	43	53	47	50	46	44	1	53	51	41	43	45	44	35	40	60	42	37	37	45	16	47	52	39	48	0	40	53	38	35	40	34	36
-40	-6	-12	-38	-12	-31	3	-53	-42	-53	-37	-38	-31	-8	-5	-32	-5	-26	-9	4	-3	-6	-51	-45	5	-5	-2	-4	-11	-3	-17	0	0	-14	-42	-6	-17	-20	-17	2	-19	-27	-54	-10	-32	-16	-6	-7	-19	-21
-3	7	20	-4	-2	14	41	-14	-8	-16	7	-1	8	14	-3	14	40	-2	45	20	28	28	-2	4	42	40	26	35	18	38	32	31	41	6	26	-3	13	22	20	12	30	-3	-14	40	16	37	4	28	-1	18
-4	0	40	23	50	-5	62	-2	-5	-11	36	8	-2	53	23	0	55	-17	50	56	39	30	64	35	59	54	40	60	38	58	27	57	49	32	53	54	-2	50	3	23	51	38	-4	53	59	46	5	34	-4	53
17	0	19	18	-5	10	24	-55	17	-48	-18	20	-52	25	22	9	21	21	29	20	29	24	19	-52	30	18	21	22	9	19	16	13	16	16	18	17	22	15	24	21	21	13	-35	19	21	16	21	9	21	24
26	20	29	4	24	32	42	2	21	-15	15	37	39	40	32	29	40	-11	34	32	35	42	34	-1	42	39	30	30	0	37	22	39	41	18	31	4	2	-33	42	42	27	20	-16	36	34	21	19	8	39	16
5	46	38	33	38	34	52	-2	34	0	39	36	35	33	34	46	50	51	46	44	44	53	40	23	52	49	39	47	47	48	30	50	51	32	38	43	-16	34	50	53	38	52	-3	49	52	45	39	29	40	47
3	1	10	0	-4	2	9	-51	-2	-76	0	6	6	4	6	5	11	2	12	0	5	14	-6	-1	0	3	6	10	3	9	4	3	0	-6	2	-2	3	3	0	3	1	0	-24	2	-2	1	3	-13	-1	7
-15	31	2	4	4	27	29	-25	15	-26	26	-16	5	23	10	15	27	8	19	27	27	21	23	9	28	30	10	25	20	31	24	28	24	-15	22	21	6	21	33	18	16	7	-30	20	26	18	29	16	14	17
9	44	14	35	8	34	54	-4	-1	-12	6	47	-15	36	33	47	43	15	53	47	44	-4	35	52	54	47	39	59	46	60	-6	48	53	46	28	46	39	-7	51	57	44	51	-4	52	49	50	38	44	51	54
[truncated: 18 more columns]
