# Supplementary material
Source: ML conference proceedings conference paper supplement (https://openreview.net/forum?id=P66QvdCPjE)
Supplement: supplementary_material [file sd15_age_profession.xlsx]

## Sheet: Sheet1
-23	24	11	3	19	-13	-25	15	-14	-33	-27	-5	-14	-31	-34	-17	18	-54	-15	-1	-2	-31	11	-18	12	-17	-18	-25	11	9	-9	2	13	-35	-17	-30	10	7	12	14	-24	6	-52	-23	2	15	14	7	15	-13
-38	-33	21	-23	15	-36	-4	-39	14	-33	-34	-32	-33	-33	3	-18	-28	-33	-35	-33	-36	-34	-10	-16	-23	-35	-39	-29	-37	-33	-1	-29	-32	-8	-36	-20	-36	1	-23	-31	-18	-31	-34	-14	-37	-23	-21	4	-10	-37
-7	9	36	19	36	14	19	6	15	-4	-9	14	-3	16	-14	1	12	-12	17	-12	6	8	-6	-9	-11	21	-12	-5	-4	4	23	17	-1	20	-6	3	-4	21	-2	-13	8	-12	-3	13	-3	13	20	20	36	21
-27	-26	16	-37	13	-39	-6	-32	-17	-31	-35	-36	-44	-40	-33	-43	-41	-37	-19	-37	-35	-29	-39	-17	-26	-15	-32	-11	-41	-26	-12	-37	-36	-40	-36	-38	-39	-35	-23	-38	-38	-34	-31	-31	-37	-34	-25	-26	-18	-39
-35	-34	25	-37	28	-31	18	-33	3	-31	-28	-18	-35	-35	-40	-32	-37	-29	-36	-29	-31	-33	13	18	-29	3		-25	-17	-24	-15	-22	-19	-24	-35	-34	-35	-23	-2	-33	-14	-35	-19	-24	-36	-37	-33	-4	-8	-26
1	7	64	41	54	32	37	0	39	42	25	19	4	31	36	17	5		14		2	2	2	20	14	39	20	4	8	23	-2	20	22	44	2	19	-3	42	22	10	46	2	14	13	12	24	26	42	30	11
-34	-27	21	-19	11	-31	-18	-41		-40	-32	-23	-40	-32	10	-37	-45		-15		-26	-36	-19	-2	-22	4	-28	-36	-36	-37	1	-34	-18	-23	-41	-28	-42	5	-1	-26	6	-30	-40		-37	-13	9	-14	5	-13
-14	-11	44	9	7	-19	17	-14	26	-14	-11	-10	-12	15	21	3	-7	0	-14	0	-16	-17	-17	14	-19	16	2	4	-11	-12	25	-10	24	6	-17	-12	-18	-2	-10	-11	-6	3	-13	-10	-17	3	12	11	11	-6
1	20	50	2	41	7	20	-2	12	-4	4	2	8	-3	-2	-7	-4	1	3	1	15	-3	-5	11	6	17	-8	10	1	-6	23	11	8	9	-1	0	-5	12	11	2	3	0	-5	4	-6	13	13	32	12	11
-49	-50	-4	-53	-7	-52	-50	-45	-31	-53	-52	-52	-49	-55	-52	-53	-51	-52	-52	-52	-51	-50	-53	-48	-40	-39	-53	-47	-52	-47	-45	-53	-36	-49	-50	-49	-54	-54	-23	-53	-53	-49	-49	-54	-52	-38	-49	-53	-31	-47
-14	-9	22	-7	38	-15	3	-13	-9	-14	-13	-14	-10	-7	-6	-15	-8	-13	-14	-13	-15	-15	-9	5	-10	-3	-1	-13	-14	-7	3	-9	-9	-7	-13	-15	-16	-15	-13	-12	-16	-11	-15	-10	-12	-15	-11	0	7	-9
-1	4	57	-4	40	-2	4	9	32	-2	3	-2	2	1	25	-3	2		5		-5	-4	4	17	1	19	3	-3	5	4	21	7	-1	20	-4	-1	4	16	11	3	16	-1	6	1	-3	-6	14	32	7	3
-22	-30	30	-35	16	-23	8	-34	-61	-20	-40	0	-34	-27	12	-35	6	-5	-27	-5	-41	-34	6	12	-22	-14	-38	-40	-31	-33	-28	-33	5	-16	-38	-31	-56	-22	-12	-3	-51	-8	-12	-54	-33	-61	7	-61	8	-6
-1	-9	38	18	33	2	13	14	15	-38	-8	15	-17	-6	-11	-2	6	-3	13	-3	-9	8	-15	12	-1	12	-3	-7	-5	5	24	2	1	21	-2	6	-19	12	-6	-10	-5	-12	-6	-6	-14	7	20	23	4	9
24	26	48	21	46	15	22	-8	33	6	-3	29	15	-2	-20	15	-3	11	23	11	14	10	10	13	3	18	-2	27	-3	6	36	-2	32	-6	-7	23	-6	30	16	6	32	11	16	17	16	9	17	4	15	20
-42	-47	6	-13	4	-51	-2	-39	-4	-24	-45	-45	-51	-6	1	-52	-9	-48	-14	-48	-51	-32	-10	-11	-37		-41	-55	-44	-24	-9	-31	-29	-30	-38	-46	-46	-33	-22	-5	-1	-24	-9	-37	-54	-52	-25	-11	-7	-47
-30	-25	20	-32	14	-28	-3	-25	0	-30	-26	-31	-28	-21	-17	-24	-33	-31	-19	-31	-33	-30	-33	-7	-30	-32	-27	-29	-29	-24	-20	-27	-31	-17	-31	-29	-29	-30	-26	-29	-27	-26	-32	-30	-31	-28	-22	-22	-20	-28
-1	3	52	-6	43	6	9	-3	-1	2	-4	-3	-4	1	10	4	-2	0	1	0	-2	-4	-5	6	16	12	-5	-4	-2	1	-19	5	12	1	-4	-5	-8	25	22	-6	23	7	-5	1	-3	1	15	-4	20	5
[truncated: 12 more columns]
