# Supplementary material
Source: ML conference proceedings conference paper supplement (https://openreview.net/forum?id=P66QvdCPjE)
Supplement: supplementary_material [file sd15_race_behavior.xlsx]

## Sheet: Sheet1
127.04		147.725		125.257	104.433	122.167	107.152	123.064	142.255			144.53		117.901	153.321	142.113	125.318		143.524	156.126	125.814	139.2	125.848			118.058	139.843	127.896	123.04	137.284		168.488	139.723	131.419	146.914	134.559	137.34	139.978
162.887	139.957	148.748	132.506	158.192	134.575	135.091	146.3	141.789	146.239	168.869	107.145	126.427	137.602	139.664	161.458	140.009	154.709	139.972	167.802	138.106	144.457	134.678	112.853	135.192	126.987	139.885	146.873	136.756	127.771	136.88	146.656	168.533	141.086	142.852	142.157	148.395	129.876	136.274
170.334		173.768	165.284	173.993	159.49	163.299	160.57	143.294	169.368	182.857	159.725	175.645	145.758	163.85	166.47	163.056	171.777	164.479	176.611	162.436	173.101	177.417	138.947	150.877	150.548	160.094	144.245	171.112	144.131	147.299		182.502	164.814	156.425	172.964	155.341	155.29	165.205
148.109	127.035	140.748	126.978	156.514	123.683	120.557	132.48	144.985	131.516	127.913	114.687	126.429	143.118	107.345	143.383	139.34	143.535	117.801	152.769	144.609	140.066	128.793	127.926	130.391	130.227	107.597	153.195	121.864	133.232	130.371	149.201	128.938	135.852	128.849	138.944	136.333	127.963	140.764
140.695	118.825	126.448	115.339	143.882	129.967	164.423	121.651	132.211	129.608	120.478	116.387	131.345	147.151	114.318	131.15	137.7	139.949	108.862	144.216	145.283	144.878	119.377	137.937	142.101	129.376	110.126	133.3		130.416	125.295	152.836	132.098	139.571	122.702	131.409	108.192	126.6	135.311
128.368		104.458	120.11	118.142	110.46	108.952	109.42	107.454	113.148	122.002	92.0253	96.8836	118.43	108.887	122.154	131.562	125.875	89.1359	124.085	116.339	100.55	109.561	94.6118	111.672	111.261	85.4846	109.653	118.391	102.07	90.0515	110.746	135.164	117.511	123.24	120.777	112.672	127.059	104.869
119.854		107.009	101.768	108.577	102.976	120.006	104.354	111.945	126.061		119.919		120.21	94.9347	122.161	110.42	95.4211	100.044	107.857	117.773	109.829	105.592	109.475			94.922		104.893	118.273	119.297	138.772	114.645	148.496	114.92	133.9	123.91	127.028
102.993		85.2509	89.6109	91.353	92.6366	88.9579	78.3512	88.2824	93.1129	97.2051	77.4379	88.2319	83.9485	86.0677	94.2548	105.522	106.93		104.29	100.789	90.4345	93.3135	70.088	99.4568	79.6124	59.7097	95.0867	86.5661	93.6337	85.058	98.8645	117.865	83.5951	91.114	100.102	93.6291	109.463	99.1528
143.932	129.336	130.853	117.199	132.149	122.567	120.953	133.561	134.708	142.645	119.311	112.807	122.023	132.41	114.789	138.479	146.767	126.585	124.371	133.251	131.883	126.807	140.33	120.761	133.076	122.658	107.032	126.712	126.849	137.267	115.963	137.094	152.208	138.84	128.339	139.105	126.969	140.943	125.531
154.339		116.914	103.341	138.025	118.021	113.022	122.711	128.495	126.698	115.946	108.731	117.51	128.122	102.465	141.626	125.19	127.88	102.975	120.634	124.394	132.74	126.094	97.5875	105.046	106.924	87.7827	116.835	105.055	112.104	114.202	127.82	126.751	122.665	118.622	119.807	131.907	126.061	110.679
116.858	96.0679	101.257	93.4157	118.928	95.8866	98.6639	89.1539	93.308	103.549	94.2466	95.492	96.6439	100.237	93.7661	112.418	106.913	109.021	88.0441	105.166	102.775	95.4603	95.0875	82.4082	95.616	94.8061	71.9697	96.8759	92.2425	112.936	84.5904	101.507	108.739	114.649	102.998	101.433	87.6226	97.8972	93.995
102.139	73.3969	92.5563	95.397	119.576	96.8477	92.6144	96.1676	77.7713	95.6481	76.0749	77.3548	80.3004	102.948	82.1336	108.372	109.769	103.52	65.894	106.101	102.684	98.1782	78.2939	76.3408	101.583	95.594	65.5131	101.136	83.6609		80.6315	88.5147	112.472	107.367	104.991	96.5863	79.3458	86.4274	89.5156
163.895		141.894	131.082	161.761	145.734	153.302	152.51	146.037	159.471	157.08	143.655	139.477	156.111	130.996	158.169	126.61	142.622	131.27	162.495	168.135	166.2	147.493	147.44		150.381		144.491	147.893	162.102	157.777	154.958	132.72	150.176	149.526	150.977	160.444	156.497	141.825
162.69	147.245	155.224	134.987	155.601	123.036	146.929	143.458	155.416	143.193	151.017	152.82	129.915	135.904	149.591	164.871	152.282	167.31	141.726	170.57	130.332	169.742	154.496	147.13	150.187	146.6	145.852	154.883	167.361	159.147	139.712	166.042	158.319	149.505	154.669	151.556	145.5	150.581	143.902
172.852	144.045	153.939	154.453	153.109	134.368	151.239	147.741	149.215	163.683	148.31	155.065	146.83	144.908	138.301	161.173	169.369	153.933	149.659	162.475	163.045	163.523	162.296	157.648	144.028	146.019	136.308	150.438	149.763	157.603	150.79	172.296	138.338	171.378	148.206	167.523	155.043	170.415	163.872
166.009	166.846	144.819	159.317	180.321	132.003	155.351	150.279	171.388	156.64	170.935	144.562			164.224		167.301	127.602		179.521	152.841	170.895		157.787	155.015	159.536	151.647		153.074	142.448	151.906	182.453	156.909	157.013	159.452		155.462	150.522	161.165
150.2	121.988	132.273		126.887	124.64	116.543	123.084	131.692	135.797		117.127	127.137	118.948	108.111	147.826	124.293	129.52	103.772	113.954	125.566	129.62	121.335	111.458	122.157	113.829	102.183	135.226	125.745	130.12	121.052	124.876	121.251	127.553	130	131.055	125.252	123.001	123.637
170.751	165.992	153.151	154.257	155.582	141.429	161.797	140.844	152.96	152.424	152.377	140.351	134.12	166.773	152.62	163.063	160.835	160.535	144.646	169.921	162.55	161.243	150.194	151.786	161.948	150.956	134.96	158.009	143.415	156.609	149.863	164.428	161.308	159.022	158.327	158.975	157.732	164.932	163.402
