# Supplementary material
Source: ML conference proceedings conference paper supplement (https://openreview.net/forum?id=P66QvdCPjE)
Supplement: supplementary_material [file sd15_race_item.xlsx]

## Sheet: Sheet1
147.6	132.283	126.136	126.185		138.985	108.224	133.678	123.553	129.983	125.849	145.39	135.368	132.3	125.843		96.7486	157.985	117.849	149.821	155.69	164.901	125.553	137.378	138.646	125.634	132.198	118.059		131.707	148.757	150.836	119.823	162.495	156.63	165.883	142.763	122.272	106.36	135.459	132.427	151.459	103.628	139.438	132.788	100.784	117.912		132.752	125.794
140.184	129.25	124.624	132.936	120.614	140.145	125.715	154.255	141.572	131.387	110.953	165.024	140.46	128.815	134.061	151.534	127.713	160.242	157.83	129.588		121.264	135.421	133.546	145.342	135.144	149.262	116.639	114.74	141.252	151.743	141.655	158.463	144.712	150.737	151.94	134.026	129.006	124.56	131.142	144.827	159.405	124.613	148.257	147.649	113.58	157.657	158.425	140.439	151.293
170.423	154.78	155.013	144.775	164.447	161.73	146.221	153.242	141.674	156.954	134.863	166.887	152.435	172.663	152.291	162.368	159.359	156.414	148.288	134.486	165.809	151.511	162.644	153.071	158.107	158.197	154.659	170.135	153.985	144.932	168.132	164.665	169.282	169.35	161.377	163.044	162.441		144.469	147.043	162.202	181.861	148.066	171.169	171.029	146.865	161.211	159.727	143.145	156.26
146.026	124.535	134.925	126.456	119.198	144.267	119.611	133.624	130.715	136.216	109.187	140.904	130.222	140.4	125.119	138.006	124.932	146.927	149.012	118.234	154.553	131.899	125.02	132.168	124.891	120.317	141.391	106.829	126.181	136.824	126.354	128.672	151.578	145.734	131.92	131.329	121.74	127.543	118.364	142.095	136.514	138.039	123.91	140.48	143.178	102.946	142.783	146.428	129.516	138.933
142.492	104.001	123.852	119.457	115.591	139.969	121.894	153.61	135.277	125.027	98.4939	68.5516	152.62		120.271	137.345	96.6882	154.043	127.652	127.701	140.12	144.275	124.968		137.324	96.323	129.73	117.174	127.205	135.962	156.647	131.688	154.203	147.936	125.939		110.809		135.112	134.593	128.604	142.133	147.487	142.81	125.822	113.06	132.522		100.952	149.79
114.306	104.631		98.0814	118.57	108.442	107.159	122.938	105.502	112.06	82.359	120.707	115.059		115.695		82.5996	144.943	122.238	101.735	135.571	112.642		108.347	130.256	93.755	106.733	96.1013	95.0397	111.02	147.804	121.767	143.072	114.503	120.441		105.415		129.648	123.006	105.141	120.747	96.2353	125.321	138.298	103.131	108.671	131.205	105.716	114.938
106.183	112.166		111.044	124.201	137.507	118.116	124.65	110.015		103.811	126.733	122.231	75.1962	110.671		108.996	101.819	115.22	97.2339	153.126	129.398	95.3916		128.46			117.265	111.214	104.078	118.281	107.113	111.305	147.597	114.434	122.766			118.782	109.172	128.614	126.53	106.403	118.433	143.125	58.8653	130.933		123.815	109.612
84.188	80.3733	85.3528	78.4533	84.3592	83.6807	89.5254	92.6356	95.0301	96.9737	72.1726	85.6498	88.5302	71.5062	100.17	102.898	81.2805	112.033	89.0783	78.549	97.7266	100.579	75.5287	88.5766	93.539	73.819	107.935	82.833	74.898	85.2557	105.635	94.7355	120.975	87.3352	91.9476	95.1494	88.609	77.5513	78.2301	99.7664	84.0331	96.2103	72.8857	98.0004	91.1575	75.9553	79.6047	101.154	79.1586	99.7463
132.771	121.392	128.687	118.976	120.233	118.776	127.805	135.257	124.594	113.673	97.0073	142.546	122.046	124.896	114.715	131.766	110.154	125.13	135.217	111.392	137.135	141.278	118.037	118.876	130.908	132.271	137.551	133.074	131.029	117.547	142.998	129.56	136.801	140.458	130.272	148.146	124.643	126.208	123.617	126.839	124.433	127.355	117.233	142.702	145.978	111.252	112.307	136.673	119.328	129.785
132.317	108.003	113.338	113.061	133.838	117.301	107.52	129.202	114.309	108.186	104.085	134.185	118.772	126.46	124.252	123.886	97.0965	138.516	120.573	115.293	157.352	131.255	95.1495	110.491	121.964	114.609	131.605	106.551	107.137	125.249	120.132	117.326	137.028	138.487	106.043	130.471	106.528	129.833	99.8829	120.771	116.961	126.953	104.164	137.563	129.045	100.144	127.369	131.899	107.503	133.426
104.052	93.5689	100.259	77.6229	111.224	102.893	92.524	108.971	89.1192	88.9685	84.0477	110.849	89.6411		100.511	101.554	81.3653	116.263	102.971	90.5956	109.112	115.402	87.7001	104.89	121.525	88.3171	121.324	88.1986	88.8192	95.7761	114.623	95.902	119.652	104.275	100.216		92.432	94.3552	80.616	104.136	96.0794	104.6	88.205	108.689	119.544	87.8533	103.728	102.301	87.1051	105.756
106.113	102.097	89.1796	67.1861	94.3154	98.7286	91.5179	95.2484	87.5135	88.1567	67.3567	113.973	94.1102	70.7244	89.7454	101.464	79.7114	98.3277	99.1269	76.8399	142.641	111.672	72.9563	94.0329	81.9214	92.8433	120.852	85.0818	83.9223	99.4337	103.268	98.3893	105.434	98.8955	92.5429		87.0378	90.0559	82.3273	104.986	85.4297	91.2342	79.9847	101.746	99.9589	84.1155	98.6775	110.451	77.0753	104.75
163.497	151.404			160.476	156.013	145.871	157.573	152.992	139.768	122.374	136.832	133.911	149.644	159.831		126.045	178.74	149.85	140.798		134.405	132.378	142.309	152.56	149.302	146.332	149.636	154.518	157.836	158.258	139.146	170.614	161.416	147.423	164.955	133.429	159.57	124.714	162.233	143.571	142.056	130.245	157.168	130.83	133.015	143.801	167.254	148.939	159.4
157.842	140.617	138.842	145.954	112.884	143.134		152.818	153.388	116.676	127.879	157.659	149.157	151.909	155.55	151.993	137.364	173.307	159.429	154.315		134.881	150.067	150.416	156.414	147.275	156.595	164.867	150.902	144.213	164.806	153.235	146.645	146.975	143.95	155.761	122.52	138.841	139.604	113.635	154.543	153.806	133.014	164.822	144.55	133.548	149.436	163.895	144.588	158
169.448	134.954	153.826	151.796	141.926	160.493	156.992	153.568	161.961	126.187	124.902	163.151	132.964	163.731	157.493	150.779	142.691	145.062	163.057	154.001	164.051	139.662	121.757	153.106	154.141	140.003	161.688	159.821	154.422	127.116	164.64	134.366	146.912	164.079	156.92	172.661	149.729		136.195	153.024	172.161	163.379	138.04	167.845	150.309	140.486	145.82	157.131	146.119	142.596
	129.19		151.058						125.722	144.129	155.594	146.736	119.238	150.134	174.994	147.102	156.384	173.287			140.896	143.515		158.903	150.172	160.663	150.662	131.481	160.315		156.076			172.928	159.388			141.898	161.886	165.217	181.146	154.416	176.076	157.91	154.24	173.685	176.877	111.901	164.992
118.434	129.233		110.508	116.979	125.196	102.539	131.115	126.606	125.14	106.929	138.474	117.67	133.797	129.736	120.752	100.814	142.111	140.083	129.984	141.743	121.135	104.624	123.434	131.749	125.306	135.844	115.585	113.659	139.398	128.08	128.204	142.305	129.497	126.24	132.721	124.874	111.732	111.43	124.702	117.984	134.104	109.638	135.98	130.13	103.09	134.899	138.506	132.352	137.413
158.924	157.4	143.88	139.328	156.299	160.405	149.028	168.182		150.388	127.029	159.471	151.188	159.601	161.508	163.544	138.631	160.606	160.416	151.498		155.28	147.357	151.781	156.859	146.117	176.616	151.009	151.81	160.472	161.701	162.52	174.564	163.976	159.45		141.84	133.26	136.603	160.169	150.048	168.332	149.883	159.285	166.274	137.823	149.402	175.295	137.159	173.897
[truncated: 7 more columns]
