# Supplementary material
Source: ML conference proceedings conference paper supplement (https://openreview.net/forum?id=P66QvdCPjE)
Supplement: supplementary_material [file sd15_race_personality.xlsx]

## Sheet: Sheet1
103.64	120.197	134.79	133.178	114.775		158.042	125.207	126.843	109.826		121.886	138.028	91.5582	128.333	99.087	133.885	111.047	132.806	120.408	126.277	129.153	104.517	140.225	130.252	130.843	144.421	122.483	107.969	138.359	107.111	135.714	122.838	104.137	113.382	109.585	130.741	130.496	139.34	133.853	130.919	147.626	147.999	111.741	144.563	129.872	126.837	140.105	105.494	128.647
148.195	149.278	149.958	133.335	114.437	133.372	150.104	162.732	121.615	137.315	168.863	125.068	138.42	116.57	120.207	107.179	124.976	143.641	122.775	124.551	133.64	146.567	134.548	147.046	141.901	126.925	133.891	117.046	155.018	130.616	120.559	163.5	127.413	116.778	117.303	137.773	128.532	116.731	148.862	134.217	133.023	135.839	149.413	131.302	136.264	152.423	133.385	133.41	140.845	128.314
182.999	175.08	181.71	149.211	139.251	161.974	169.465	166.148	153.229	147.201	179.869	139.273	177.811	127.993	123.448	151.735	145.599	139.679	149.072	140.971	152.138	153.295	151.743	172.953	157.768	151.389	168.241	139.356	161.624	168.674	142.644	161.531	147.488	132.538	151.827	151.412	166.474	156.704	154.106	134.403	146.666	165.76	175.512	158.843	145.031	174.024	150.984	155.486	129.833	146.368
135.472	120.47	130.402	128.742	107.144	122.222	136.971	146.334	116.56	120.902	170.43	111.676	143.361	111.713	132.432	116.626	132.349	114.27	126.831	115.694	103.674	129.112	109.009	138.112	130.378	118.65	125.472	97.1578	135.649	141.027	105.331	142.2	134.244	111.443	108.635	116.94	116.508	137.354	128.881	114.714	111.575	135.484	146.284	106.281	118.144	131.976	115.488	138.961	116.976	116.451
135.976	132.162	120.062	130.693	100.297	113.37	142.116	136.755	125.618	120.706	153.309	112.088	129.212	105.028	115.348	108.059	147.069	123.448	134.094	123.223	119.798	138.984	117.936	119.187	136.731	123.682	120.136	109.414	130.974	149.834	108.998	142.836	142.637	100.936	96.335	121.681	117.662	135.206	137.462	121.568	103.38	139.558	148.641	116.725	124.385	129.028	131.037	134.881	100.458	120.012
104.596	126.865	122.876	110.129	101.914	121.88	113.807	106.875	78.3654	93.6134	146.075	109.894	118.754	97.9517	119.056	83.9125	122.857	119.742	103.215	100.091	102.397	122.535	98.6122	114.589	114.846	107.917	95.4182	113.441	111.546	113.99	101.086	134.62	122.826	109.951	94.0779	104.573	91.09	100.897	118.193	115.918	93.0964	138.704	143.101	90.921	101.719	122.697	111.045	126.43	101.727	95.8665
90.3591	112.418	142.703	120.086	114.317	130.511	135.849	115.86	120.048	119.457	125.913	105.975	120.351	84.1955	90.3855	112.684	129.757	117.509		100.384	91.0053	99.0021		97.3363	132.129	123.335	115.988	99.2655	115.694	110.511	96.5177	136.339	125.253	102.081	107.054	98.4258	105.233	94.3874	123.964	96.7492	111.842	125.877	124.609	117.827	109.949	122.157	111.787	118.912	87.0292	108.733
78.2417	96.3617	94.5718	86.2299	73.1878	86.3264	97.32	101.144	85.5546	74.7764	117.692	97.485	104.827	70.3379	86.9773	67.237	96.7012	79.405	83.6572	77.0867	79.0011	83.7866	75.5711	97.1954	80.6758	86.0787	79.4883	78.7793	76.7181	90.7264	69.1756	103.35	89.1445	89.2634	67.9389	95.9651	71.2419	81.0822	98.3956	87.345	79.7895	100.635	98.2134	64.83	81.417	93.7839	92.6443	103.679	86.5399	76.527
119.822	129.074	135.386	108.335	106.001	113.409	123.387	134.713	106.505	120.24	156.34	121.621	137.985	111.489	130.83	100.167	138.002	142.254	115.39	107.188	108.492	126.534	132.225	131.797	125.995	131.297	122.407	107.461	121.569	109.807	111.384	146.112	140.981	111.403	106.162	111.835	129.896	111.34	134.267	109.985	116.208	114.215	152.509	115.321	125.159	123.308	116.953	117.955	97.4486	112.994
116.284	107.056	114.424	106.3	100.323	108.285	108.488	135.884	105.084	91.3822	165.925	91.765	119.684	98.6264	110.025	97.3311	110.161	102.242	110.333	92.5597	100.863	109.962	97.9602	114.808	108.903	130.134	108.039	97.838	120.741	117.926	84.8808	123.103	116.885	101.87	98.6066	100.928	101.118	115.485	115.377	107.837	97.8988	121.412	117.944	115.243	106.238	119.168	98.8328	128.157	97.3026	102.579
96.2368	97.8476	100.072	99.2373	82.8692	96.3022	98.0227	104.744	87.5212	82.7997	130.852	90.8753	98.8612	89.779	96.8416	74.1806	103.071	82.4009	88.3455	82.7212	82.1013	96.9459	77.5025	94.1554	97.7296	100.071	85.6646	78.0784	96.3079	94.2082	69.2481	108.336	101.472	79.1222	80.8415	90.0213	91.8121	106.509	113.385	91.2964	78.5728	108.929	124.456	84.4176	89.7878	104.834	91.02	106.577	88.0289	90.1382
96.0294	93.6158	95.2141	106.99	74.6241	88.559	99.6128	104.174	77.9659	73.2997	141.586	83.0663	104.797	75.6031	107.062	65.3326	110.416	83.2145	92.7523	80.0389	73.9233	90.1747	84.0505	79.3403	85.2295	89.1474	81.4921	68.2519	97.7087	94.5331	90.2994	100.984	96.0303	67.2346	73.4311	92.4734	75.0339	87.4959	95.4256	90.123	75.2733	95.7474	120.492	72.7839	78.8579	88.6481	89.165	116.173	80.0261	75.6287
145.298	157.355	135.192	147.818	124.357	147.23	142.026	140.806	128.28	143.308	169.03	145.111	159.187	131.493	134.378	137.494	129.961	131.012	135.303	131.572	123.269	133.926	145.845	138.13	152.452	158.344	138.747	122.257	141.527	150.504	123.711	143.991	152.712	130.955	125.774	132.922	131.723	132.596	150.519	138.719	124.555	150.647	141.595	156.362	134.733	146.885	129.821	142.122	124.873	140.132
145.914	168.039	157.476	136.995	123.724	135.566	124.395	165.401	135.691	132.618	179.485	146.714	164.123	121.174	147.208	121.836	160.114	140.007	143.675	134.067	134.749	151.374	160.226	149.676	126.959	152.578	138.357	129.306	138.783	151.582	135.876	164.86	150.733	134.335	134.09	157.058	142.52	111.085	151.859	138.112	119.043	150.46	167.397	148.681	156.968	139.201	144.182	137.82	132.986	132.727
165.279	156.666	159.26	142.921	125.916	136.511	151.713	162.813	151.18	141.871	170.609	133.501	165.58	135.003	142.4	135.671	152.308	153.341	149.514	140.95	145.06	152.67	139.8	163.684	145.119	163.285	156.212	141.101	153.282	158.048	130.861	162.457	158.142	135.812	122.187	150.479	143.356	150.466	153.224	140.785	151.002	155.581	177.67	133.645	144.96	155.816	143.374	146.829	134.355	147.75
164.676	156.403	148.947	151.003	146.519	167.317	126.695	145.963	151.905	158.671	174.414	151.962	175.835	135.081	143.202	148.027	145.82	155.996	155.69	126.633	139.795	170.139	157.836	175.248	152.063	158.235	167.261	161.109	162.097	155.178	142.314	173.535	157.708	138.535	158.785	157.584	155.445	147.68	138.23	158.524	147.329	170.433	160.575	139.275	157.346	154.608	165.116	169.767	134.192	147.609
105.296	136.468	130.463	121.148	106.073	119.522	117.151	131.556	114.813	103.498	145.964	118.418	111.584	92.1915	135.218	112.501	114.556	111.748	112.468	110.143	112.609	128.288	103.753	127.247	138.495	133.219	114.856	104.649	123.614	122.536	99.1661	128.97	132.614	116.535	114.961	117.994	119.241	120.651	120.535	121.674	112.544	131.051	138.439	117.429	115.008	124.031	120.08	129.028	114.653	111.7
149.859	159.236	157.751	158.694	139.992	138.463	151.731	147.385	156.208	153.813	167.459	154.809	165.696	132.565	145.134	130.045	154.038	141.561	146.647	131.432	158.162	159.87	136.58	159.026	144.805	163.62	148.494	136.966	146.312	161.847	138.637	168.202	158.293	135.336	133.6	148.271	143.914	146.279	157.271	140.716	144.115	165.665	173.531	135.003	143.018	157.348	145.42	151.464	138.176	152.061
[truncated: 20 more columns]
