# Supplementary material
Source: ML conference proceedings conference paper supplement (https://openreview.net/forum?id=P66QvdCPjE)
Supplement: supplementary_material [file sd15_race_profession.xlsx]

## Sheet: Sheet1
136.811	138.585	119.92	118.125	113.99	124.255	111.505	159.533	136.021	131.386	146.892	140.3	110.073	137.018	116.845	128.927	113.062	128.644	150.731	118.928	141.524	129.874	121.553	113.121	142.017	255	99.6716	148.188	141.784	145.37	143.147	132.419	132.758	110.196	148.318	140.571	151.993	120.14	138.56	128.754	128.369	132.21	133.492	136.779	142.092	147.641	141.041	137.624	145.998	126.889
151.552	118.954	130.533	112.49	138.413	125.663	129.367	143.825	127.869	124.965	106.881	133.297	127.083	105.805	144.976	160.31	128.152	117.062	121.64	144.997	141.587	109.659	153.612	119.517	136.278	117.752	143.266	138.88	149.8	146.063	144.052	126.489	141.227	125.381	114.187	131.208	145.152	128.401	140.001	142.49	148.408	116.622	109.352	131.44	143.846	162.734	141.322	124.876	117.2	123.085
143.624	147.875	147.519	145.363	161.852	151.406	139.634	101.398	119.574	131.745	130.592	153.876	125.636	119.144	146.884	130.502	138.119	131.269	161.532	146.357	144.712	148.518	151.472	123.737	132.229	125.409	144.259	168.906	148.039	135.753	148.003	152.261	137.91	129.021	113.894	138.966	129.382	100.256	126.375	134.328	150.37	122.975	122.936	149.139	145.983	165.473	142.92	122.127	148.462	118.996
134.083	133.386	128.572	106.492	117.257	141.178	118.623	132.776	117.431	129.621	134.387	142.383	118.039	115.465	112.576	137.098	111.028	120.481	134.801	127.846	129.483	131.998	128.433	116.063	124.813	128.41	120.657	148.702	144.433	130.176	123.721	103.837	116.304	102.284	121.796	119.107	124.507	133.518	135.449	134.88	156.314	111.122	123.041	143.637	130.566	130.199	134.796	136.327	103.906	126.106
121.494	125.241	138.557	91.1904	131.538	139.307	117.344	146.679	103.873	129.885	136.085	125.378	111.352	106.817	116.254	140.168	105.578	122.116	112.654	136.128	131.568	133.227	134.708	107.122	121.739	125.394	123.217	133.13	119.771	130.2	111.653	113.227	127.932	114.732	120.503	133.99	130.641	122.278	117.221	131.527	154.664	117.54	129.616	134.046	131.8	145.949	129.479	130.606	106.881	136.429
113.643	113.913	109.935	86.9109	105.637	118.366	97.7229	113.356	116.217	95.7226	101.292	115.525	109.661	112.078	95.9896	118.941	103.21	106.963	123.551	255	115.999	107.62	103.485	102.054	121.64	94.8564	132.5	135.44	137.459	112.978	111.522	92.4042	118.88	111.914	109.567	125.82	146.586	108.014	119.566	102.271	122.581	105.585	103.865	109.72	108.849	118.422	109.182	123.459	103.961	119.641
112.99	114.724	128.954	91.3936	113.269	127.633	125.53	112.53	255	122.55	255	134.671	108.73	118.355	114.27	125.829	108.163	103.494	137.404	255	114.511	134.653	102.428	77.5459	95.142	255	105.926	119.339	110.382	255	110.121	102.133	106.355	106.624	91.6234	123.521	121.656	90.7959	114.958	100.649	133.5	106.703	120.856	255	112.286	121.513	106.978	93.6532	118.532	121.874
85.126	86.8167	84.8274	79.4772	82.1987	81.707	77.3323	94.1605	93.1101	82.3547	67.6188	83.7601	78.5771	78.954	82.6144	90.8667	74.2066	80.0473	100.335	79.2986	83.9596	82.1611	61.6731	85.6844	78.5304	65.9012	108.922	104.022	103.233	85.3825	86.9631	73.658	78.7067	71.2015	63.2888	101.777	92.0699	85.6272	99.9322	76.8908	92.0576	82.4508	83.9338	81.4616	82.9984	94.2565	78.8086	83.9885	84.0225	86.5588
120.925	116.604	100.793	101.938	129.063	125.681	113.435	124.302	115.277	133.022	119.311	135.808	128.627	124.838	110.869	133.717	111.045	129.901	139.444	117.693	120.447	122.911	119.649	117.39	114.908	118.608	113.811	129.79	126.834	113.424	123.628	105.641	124.489	106.131	102.398	136.353	112.298	99.7874	113.365	116.064	129.946	120.896	121.459	127.357	123.715	124.49	117.573	103.587	121.832	120.583
114.391	129.335	103.908	96.3822	99.728	130.004	103.954	125.489	109.835	126.172	120.885	111.523	109.358	111.562	114.822	134.289	104.464	112.821	124.405	111.077	114.836	126.576	123.144	117.299	112.996	124.55	135.668	129.844	111.597	121.639	111.497	97.9591	117.017	101.917	118.31	123.967	126.384	103.527	120.593	120.925	136.172	103.173	116.899	117.2	132.428	118.267	119.733	113.958	106.059	118.804
96.7856	112.005	109.228	75.6766	81.8247	105.398	83.6968	105.515	96.3651	98.8173	103.663	97.5854	92.0818	88.3226	105.799	100.594	91.1624	95.5667	96.5805	93.138	106.26	92.8553	84.5124	96.1491	91.5815	89.9057	118.567	115.711	100.36	95.4855	87.2084	81.3784	100.305	84.4884	95.807	118.022	116.461	93.9867	107.174	95.0607	111.507	114.621	97.5729	103.444	115.21	101.934	82.601	96.8559	87.8791	95.9439
91.9076	105.875	79.2015	73.1961	77.3926	105.625	72.9375	111.634	86.4352	111.613	99.8094	100.923	95.9455	89.3872	87.0869	93.0056	83.3152	93.9542	109.597	255	96.9065	87.7228	82.0057	79.1649	94.7287	82.7925	114.836	99.2968	100.768	103.678	80.3026	84.2826	88.5255	82.804	107.353	106.796	105.847	91.611	110.308	92.8925	117.115	102.372	89.7207	103.852	104.845	93.7773	94.3241	97.9036	76.8836	117.966
137.24	151.794	125.444	122.758	140.192	155.276	136.051	145.747	130.554	122.404	145.717	133.001	144.937	145.707	129.432	159.817	137.312	135.894	164.778	145.985	145.855	146.817	129.569	154.323	141.203	125.857	163.826	169.267	164.423	162.907	152.125	137.988	156.431	133.947	139.002	155.509	140.693	148.031	157.167	143.369	153.078	147.6	156.505	155.36	134.595	80.4014	151.573	134.2	151.077	156.21
127.825	148.039	144.925	140.328	154.997	154.882	142.15	122.805	133.303	135.854	131.005	149.098	133.117	132.237	132.072	132.741	151.282	138.383	143.024	131.258	146.576	143.185	146.976	126.579	135.348	125.129	146.407	148.187	122.796	122.729	151.732	144.266	150.702	131.827	117.616	135.939	130.329	122.952	134.281	123.576	162.236	132.88	112.18	149.323	139.852	152.79	152.955	131.97	125.915	121.9
141.201	156.722	143.012	123.13	150.007	154.246	145.365	132.192	131.681	145.128	138.606	156.883	141.737	125.512	147.147	156.594	139.38	138.898	156.667	138.461	155.899	135.721	154.758	126.534	138.325	127.117	150.243	165.616	132.928	155.141	154.837	129.764	157.046	126.019	104.824	142.422	137.515	118.379	127.377	148.833	167.059	134.195	143.911	150.475	155.113	161.915	141.974	125.506	130.921	135.311
161.811	133.133	170.211	127.42	131.885	149.092	123.666	112.331	126.544	148.662	132.032	149.346	127.556	136.345	139.684	150.929	138.137	114.003	145.309	142.557	158.564	167.109	150.299	128.955	158.18	255	147.86	171.865	126.157	162.256	148.637	157.892	155.793	147.519	109.689	255	167.455	133.874	118.142	141.012	149.82	120.17	135.672	146.303	146.617	158.184	152.667	135.885	159.315	140.117
122.664	122.012	110.974	109.781	119.318	120.177	100.504	139.6	126.351	135.147	111.331	124.576	115.032	94.8483	102.279	140.648	111.025	130.537	132.131	123.675	113.7	124.049	131.971	107.8	116.962	114.393	111.072	144.39	125.883	126.794	117.845	113.025	128.848	102.639	116.068	115.29	123.682	125.659	117.363	114.608	134.28	111.752	117.798	101.95	136.549	117.179	122.384	119.871	113.799	147.722
152.359	147.571	152.173	117.486	149.877	156.25	137.682	144.066	139.06	139.717	131.483	140.809	138.206	132.802	138.985	160.558	133.788	146.521	159.602	151.171	152.473	146.908	148.89	126.499	143.189	146.551	164.589	153.613	155.983	142.704	155.959	132.986	153.131	131.288	127.048	160.786	145.625	137.482	139.644	138.403	142.316	140.275	142.081	148.442	138.253	155.385	152.899	140.684	144.113	154.636
[truncated: 12 more columns]
